# Supplementary material
Source: PubMed Central journal article supplement (PMC2938120)
Supplement: supp_M110.000349_mcp.M110.000349-1.pdf [file supp_M110.000349_mcp.M110.000349-1.pdf]

## Supplemental Tables

Supplemental Table 1. Primers used for RT- or QRT-PCR and other analyses

| Genes          | Sequences                                                    | Annealing Temp. (°C) | Length of amplified fragments (bp) |
|----------------|--------------------------------------------------------------|----------------------|------------------------------------|
| I <sup>a</sup> |                                                              |                      |                                    |
| Gh <i>UER1</i> | 5'-CACTTGAGTCCGACATAGCCAAC<br>5'-TCCTTAAACCCGATACCCGTT       | 58.4                 | 247                                |
| Gh <i>UGP1</i> | 5'-GTCGGTTCAAGACAATCCCAAG<br>5'-TCCGCAAGACCACAAAGCAG         | 59.2                 | 300                                |
| Gh <i>UGP2</i> | 5'-CAATTTGTGGGTCAACCTGAATGC<br>5'-CAACACACCAAATCGGGGAAAC     | 62.6                 | 572                                |
| Gh <i>UGD1</i> | 5'-GACCCGCAGGTGACCGAAGA<br>5'-TGAATCAAACCTGACCCGGACTCC       | 63.2                 | 400                                |
| Gh <i>RHM1</i> | 5'-ATGGCTAAAAGGAACTTGAACG<br>5'-CAGACTAGGATACTGCTTGGTGC      | 56.6                 | 479                                |
| Gh <i>RHM2</i> | 5'-ATCTCACAAAACAGAAACAATTCGTG<br>5'-GAAATCTTGGTGATGAAGTTGCGT | 57.1                 | 209                                |
| Gh <i>RHM3</i> | 5'-GGAAGAACAAGCCAAGGTGATC<br>5'-TGAAACTAAACAGATGCGGAGG       | 58.4                 | 286                                |
| Gh <i>RHM4</i> | 5'-GTGTTGTGAGCCACAATGAGATACTG<br>5'-AACAAACAACACCACCTGGATGAG | 59.5                 | 315                                |
| Gh <i>GAE1</i> | 5'-ACGCCAGGGAAGTTCAAGGTCG<br>5'-GCCGTGGCTGTTAAGCAGGGAT       | 65.0                 | 386                                |
| Gh <i>GAE2</i> | 5'-TAGCCAAAGCAGCCAATCCTC<br>5'-GAAGAAATAAGCCATGTCGGGTC       | 57.8                 | 443                                |
| Gh <i>GAE3</i> | 5'-TGAAAGGTTGTTTAGGAGCGTTAGAC<br>5'-ACCCAGAAGATAAATCCGTGGTG  | 58.6                 | 279                                |
| Gh <i>GAE4</i> | 5'-TAGCTGCATTGGATACTGCTGAG<br>5'-CCCGTTCCGTGGTAACTTCATA      | 58.2                 | 185                                |
| Gh <i>GAE5</i> | 5'-GGGATATTATGAAGTTGCCACGAA<br>5'-TCTTCCCACCATTATAGTAACCAAGA | 57.3                 | 159                                |
| Gh <i>UBQ7</i> | 5'-GAAGGCATTCCACCTGACCAAC<br>5'-CTTGACCTTCTTCTTGTGCTTG       | 57.2                 | 198                                |
| At <i>UER1</i> | 5'-CTCGGTATGAGAAAGTTGTGGACA<br>5'-TTCTTGTTGGGCTCAAACACGAAC   | 58.0                 | 334                                |
| At <i>GAE6</i> | 5'-CAATCCTCAACAGCCAAACGAC<br>5'-ACTCGCTGGTTGGTCTGTTCCG       | 60.0                 | 480                                |
| At <i>UBQ5</i> | 5'-GGTGCTAAGAAGAGGAAGAAT<br>5'-CTCCTTCTTTCTGGTAAACGT         | 58.1                 | 237                                |
| II             |                                                              |                      |                                    |
| Gh <i>UER1</i> | 5'-GGATCCATGGGGTTTCCGGCAAATG                                 | 63.1                 | 913                                |

|                            |                                         |      |      |
|----------------------------|-----------------------------------------|------|------|
|                            | 5'-TCGACCTGATCAAGCTCCACCAGTCTTC         |      |      |
| Gh <i>UGP1</i>             | 5'-GATCCATGGAGAACTCGATCATATCAAATCTC     | 62.3 | 1413 |
|                            | 5'-CTCGAGGCTGGATAAGTCTCCGGGGCCATT       |      |      |
| Gh <i>UGP2</i>             | 5'-GGATCCATGGAAAAGCTGGAACACCTCAA        | 63.1 | 1407 |
|                            | 5'-CTCGAGGATGTCTTCGGGGACATTAATTTT       |      |      |
| Gh <i>UGD1</i>             | 5'-GCTAGCATGAAGATCTGTTGCATTGGAGC        | 61.3 | 1452 |
|                            | 5'-GAGCTCTTATGCTACTGCAGGCATGTCC         |      |      |
| Gh <i>GAE3</i>             | 5'- GGATCCATGCCAACAGATAACAAGCAA         | 56.1 | 1391 |
|                            | 5'- GAATTCCATGGAAATGAAAATATGAAAGC       |      |      |
| III                        |                                         |      |      |
| At <i>UER1g</i>            | 5'-GCCTGCAGCATACTAATTACACTGCTAAGACA     | 61.7 | 5028 |
|                            | 5'- GCGAATTCAGCTTAATTAACACATGAAAGA      |      |      |
| Gh <i>UER1c</i>            | 5'- GCAAGCTTCATACTAATTACACTGCTAAGACA    | 61.8 | 2935 |
|                            | 5'- GCGTCGACTCAAGCTCCACCAGTCTTCT        |      |      |
| At <i>GAE6g</i>            | 5'-GCCGAATTCTGTTTAACTTATTCGCATTTTTGTCG  | 58.0 | 4717 |
|                            | 5'-GCCCTGCAGTTACATGATTCGGTATGAGATAGTTTG |      |      |
| Gh <i>GAE3c</i>            | 5'-GCGGTACCATGCCAACAGATAACAAGCAA        | 56.1 | 1391 |
|                            | 5'-GCTCTAGACATGGAAATGAAAATATGAAAGC      |      |      |
| IV                         |                                         |      |      |
| FP                         | 5'-TTGTGTGAATTGTTGAGTTTTG               | 59.1 |      |
| RP                         | 5'-TGGAAGCTCTGGCAATGTTTC                | 58.5 |      |
| LBb1                       | 5'-GCGTGGACCGCTTGCTGCAACT               | 58.0 |      |
| V                          |                                         |      |      |
| FP'                        | 5'-CATAGGCCTAATTTGGGGATC                | 59.7 |      |
| RP'                        | 5'-TTGGTCTGTTCCGGTGTCTTC                | 60.1 |      |
| LBb1.3                     | 5'-ATTTTGCCGATTTCCGGAAC                 | 56.0 |      |
| <sup>b</sup> <i>NPT-II</i> | 5'-GTTGTCACTGAAGCGGGAAGGGA              | 65.0 | 533  |
|                            | 5'-AGAAGGCGATAGAAGGCGATGCG              |      |      |

<sup>a</sup>I, primers for QRT-PCR. Primers named At *UER1* and At *GAE6* were also used for RT-PCR analysis.

II, primers used for protein expression. III, primers for plant genetic transformation. IV, primers for identification of SALK\_100812. V, primers for identification of SALK\_104454C.

<sup>b</sup>*NPT-II* primers were used in Southern blotting experiments for probe synthesis.

Supplemental Table 2. Detailed information regarding all identified peptides

| Spot no. | Protein name             | Accession no. | Start | End | Observed | MW(Exp.) <sup>a</sup> | MW(Theo.) <sup>b</sup> | ppm | Miss | Sequence                           | Modification  |
|----------|--------------------------|---------------|-------|-----|----------|-----------------------|------------------------|-----|------|------------------------------------|---------------|
| 1        | profilin                 | ABO43717      | 48    | 73  | 2762.54  | 2761.54               | 2761.375               | 59  | 1    | EITDIMKDFDEPG<br>HLAPTGLHLGGAK     |               |
|          |                          |               | 48    | 73  | 2778.55  | 2777.54               | 2777.369               | 61  | 1    | EITDIMKDFDEPG<br>HLAPTGLHLGGAK     | Oxidation (M) |
|          |                          |               | 55    | 73  | 1932.09  | 1931.08               | 1930.954               | 68  | 0    | DFDEPGHLAPTGL<br>HLGGAK            |               |
|          |                          |               | 74    | 86  | 1416.87  | 1415.86               | 1415.76                | 73  | 0    | FMVIQGEPGAVIR                      |               |
|          |                          |               | 74    | 86  | 1432.9   | 1431.89               | 1431.754               | 93  | 0    | FMVIQGEPGAVIR                      | Oxidation (M) |
|          |                          |               | 98    | 123 | 2936.66  | 2935.65               | 2935.457               | 67  | 1    | PVTPGQCNMVVE<br>R                  |               |
|          |                          |               | 98    | 123 | 2952.68  | 2951.67               | 2951.452               | 75  | 1    | KTAQALVFGIYEE<br>PVTPGQCNMVVE<br>R | Oxidation (M) |
|          |                          |               | 99    | 123 | 2808.55  | 2807.55               | 2807.362               | 65  | 0    | TAQALVFGIYEEL<br>VTPGQCNMVVER      |               |
|          |                          |               | 99    | 123 | 2824.58  | 2823.57               | 2823.357               | 75  | 0    | TAQALVFGIYEEL<br>VTPGQCNMVVER      | Oxidation (M) |
|          |                          |               | 124   | 133 | 1078.6   | 1077.59               | 1077.534               | 54  | 0    | LGDYLAEQGL                         |               |
| 2        | major latex-like protein | FJ415202      | 26    | 40  | 1722.91  | 1721.91               | 1721.83                | 46  | 0    | DSTTIFPQALSHD<br>YK                |               |
|          |                          |               | 41    | 56  | 1612.96  | 1611.95               | 1611.86                | 55  | 1    | SIQVLEGDGKAPG<br>SVR               |               |
|          |                          |               | 57    | 68  | 1303.81  | 1302.8                | 1302.72                | 61  | 0    | LINYAEGSPIVK                       |               |

|   |           |          |     |     |         |         |          |    |   |                              |               |
|---|-----------|----------|-----|-----|---------|---------|----------|----|---|------------------------------|---------------|
|   |           |          | 83  | 95  | 1526.92 | 1525.91 | 1525.84  | 45 | 1 | KYVYSIIDGDLLK                |               |
|   |           |          | 84  | 95  | 1398.83 | 1397.82 | 1397.74  | 57 | 0 | YVYSIIDGDLLK                 |               |
|   |           |          | 117 | 123 | 985.49  | 984.48  | 984.4    | 81 | 0 | WSCEFEK                      |               |
|   |           |          | 124 | 135 | 1284.75 | 1283.74 | 1283.66  | 62 | 0 | ASEEIPDPSVIK                 |               |
|   |           |          | 124 | 140 | 1859.05 | 1858.04 | 1857.97  | 37 | 1 | ASEEIPDPSVIKEF<br>AVK        |               |
|   |           |          | 141 | 152 | 1478.8  | 1477.79 | 1477.72  | 47 | 1 | NFKEIDDYLHGK                 |               |
|   |           |          | 144 | 153 | 1160.65 | 1159.64 | 1159.55  | 77 | 1 | EIDDYLHGKA                   |               |
| 3 | annexin 1 | AAR13288 | 6   | 22  | 1844.05 | 1843.04 | 1842.959 | 47 | 1 | VPAHVPAPSEDAE<br>QLRK        |               |
|   |           |          | 22  | 41  | 2311.29 | 2310.28 | 2310.212 | 30 | 1 | KAFEGWGTNEQLI<br>IDILAHR     |               |
|   |           |          | 23  | 41  | 2183.2  | 2182.19 | 2182.117 | 33 | 0 | AFEGWGTNEQLII<br>DILAHR      |               |
|   |           |          | 23  | 46  | 2723.5  | 2722.49 | 2722.394 | 36 | 1 | AFEGWGTNEQLII<br>DILAHRNAAQR |               |
|   |           |          | 52  | 63  | 1457.81 | 1456.81 | 1456.72  | 60 | 1 | TYREAYGEDLLK                 |               |
|   |           |          | 55  | 75  | 2445.22 | 2444.21 | 2444.123 | 35 | 1 | EAYGEDLLKSLDE<br>ELSSDFER    |               |
|   |           |          | 76  | 87  | 1330.81 | 1329.81 | 1329.729 | 58 | 0 | AVVLFTLDP AER                |               |
|   |           |          | 76  | 97  | 2414.35 | 2413.34 | 2413.264 | 32 | 1 | AVVLFTLDP AERD<br>AFLAHEATK  |               |
|   |           |          | 88  | 98  | 1258.72 | 1257.71 | 1257.647 | 53 | 1 | DAFLAHEATKR                  |               |
|   |           |          | 98  | 113 | 1994.06 | 1993.05 | 1992.966 | 41 | 1 | RFTSSHWVLMEIA<br>CTR         |               |
|   |           |          | 98  | 113 | 2010.01 | 2009    | 2008.961 | 21 | 1 | RFTSSHWVLMEIA<br>CTR         | Oxidation (M) |
|   |           |          | 99  | 113 | 1837.96 | 1836.95 | 1836.865 | 47 | 0 | FTSSHWVLMEIAC                |               |

|   |         |          |     |     |         |         |          |    |    |                |               |
|---|---------|----------|-----|-----|---------|---------|----------|----|----|----------------|---------------|
|   |         |          |     |     |         |         |          |    | TR |                |               |
|   |         |          | 99  | 113 | 1853.95 | 1852.94 | 1852.86  | 44 | 0  | FTSSHWVLMEIAC  | Oxidation (M) |
|   |         |          |     |     |         |         |          |    |    | TR             |               |
|   |         |          | 114 | 123 | 1216.71 | 1215.7  | 1215.636 | 52 | 1  | SSHELFNVRK     |               |
|   |         |          | 124 | 131 | 1037.56 | 1036.55 | 1036.534 | 19 | 1  | AYHDLYKK       |               |
|   |         |          | 132 | 142 | 1265.68 | 1264.67 | 1264.605 | 51 | 0  | SLEEDVAHHTK    |               |
|   |         |          |     |     |         |         |          |    |    | SLEEDVAHHTKGD  |               |
|   |         |          | 132 | 146 | 1756.91 | 1755.9  | 1755.818 | 49 | 1  | YR             |               |
|   |         |          | 158 | 169 | 1426.71 | 1425.71 | 1425.656 | 36 | 0  | YQGEEVNMTLAR   | Oxidation (M) |
|   |         |          |     |     |         |         |          |    |    | QAINKLGTDDEWAL |               |
|   |         |          | 252 | 266 | 1715.95 | 1714.95 | 1714.9   | 27 | 1  | TR             |               |
|   |         |          | 306 | 316 | 1088.59 | 1087.58 | 1087.595 | -9 | 0  | MLLALIGAGDV    | Oxidation (M) |
| 6 | annexin | AAB67993 | 21  | 40  | 2184.26 | 2183.25 | 2183.149 | 46 | 1  | KAFSGWGTNEGLI  |               |
|   |         |          |     |     |         |         |          |    |    | IDILGHR        |               |
|   |         |          | 22  | 40  | 2056.18 | 2055.17 | 2055.054 | 57 | 0  | AFSGWGTNEGLII  |               |
|   |         |          |     |     |         |         |          |    |    | DILGHR         |               |
|   |         |          | 22  | 45  | 2654.49 | 2653.48 | 2653.336 | 53 | 1  | AFSGWGTNEGLII  |               |
|   |         |          |     |     |         |         |          |    |    | DILGHRNAEQR    |               |
|   |         |          | 50  | 62  | 1530.91 | 1529.9  | 1529.761 | 92 | 1  | KTYAETYGEDLLK  |               |
|   |         |          | 51  | 62  | 1402.8  | 1401.79 | 1401.666 | 91 | 0  | TYAETYGEDLLK   |               |
|   |         |          | 63  | 74  | 1436.83 | 1435.82 | 1435.694 | 88 | 1  | ALDKELSNDFER   |               |
|   |         |          | 75  | 86  | 1395.92 | 1394.91 | 1394.792 | 85 | 0  | LVLLWALDPAER   |               |
|   |         |          |     |     |         |         |          |    |    | LVLLWALDPAERD  |               |
|   |         |          | 75  | 96  | 2422.45 | 2421.44 | 2421.327 | 48 | 1  | ALLANEATK      |               |
|   |         |          |     |     |         |         |          |    |    | WTSSNQVLMEIAC  |               |
|   |         |          | 98  | 112 | 1795.98 | 1794.97 | 1794.839 | 75 | 0  | TR             |               |
|   |         |          |     |     |         |         |          |    |    | WTSSNQVLMEIAC  |               |
|   |         |          | 98  | 112 | 1811.98 | 1810.97 | 1810.834 | 77 | 0  | TR             | Oxidation (M) |

|    |               |          |     |     |         |         |          |    |   |                              |
|----|---------------|----------|-----|-----|---------|---------|----------|----|---|------------------------------|
|    |               |          | 113 | 121 | 1009.62 | 1008.61 | 1008.546 | 61 | 0 | SANQLLHAR                    |
|    |               |          | 130 | 146 | 1951.05 | 1950.04 | 1949.923 | 61 | 1 | KSLEEDVAHHTTG<br>DFHK        |
|    |               |          | 131 | 146 | 1822.97 | 1821.96 | 1821.828 | 74 | 0 | SLEEDVAHHTTGD<br>FHK         |
| 18 | annexin       | FJ415173 | 25  | 40  | 1738.98 | 1737.97 | 1737.92  | 34 | 1 | GWGTDEKAIISVL<br>GHR         |
|    |               |          | 32  | 40  | 965.6   | 964.59  | 964.58   | 10 | 0 | AISVLGHR                     |
|    |               |          | 50  | 62  | 1612.89 | 1611.89 | 1611.8   | 49 | 0 | LAYEDLYQEDLIK                |
|    |               |          | 50  | 63  | 1768.99 | 1767.98 | 1767.9   | 45 | 1 | LAYEDLYQEDLIK<br>R           |
|    |               |          | 63  | 74  | 1409.76 | 1408.75 | 1408.68  | 49 | 1 | RLESELGDFEK                  |
|    |               |          | 79  | 96  | 1980.15 | 1979.14 | 1979.08  | 30 | 1 | WILDPADRDAVLA<br>NVAIK       |
|    |               |          | 87  | 96  | 1013.59 | 1012.58 | 1012.59  | -9 | 0 | DAVLANVAIK                   |
|    |               |          | 97  | 112 | 1891.06 | 1890.05 | 1889.98  | 37 | 1 | KLSPDHHVIVEISC<br>TR         |
|    |               |          | 98  | 112 | 1762.97 | 1761.96 | 1761.88  | 45 | 0 | LSPDHHVIVEISCT<br>R          |
|    |               |          | 98  | 121 | 2757.51 | 2756.5  | 2756.43  | 25 | 1 | LSPDHHVIVEISCT<br>RSPEELLAVR |
|    |               |          | 113 | 122 | 1169.71 | 1168.71 | 1168.66  | 42 | 1 | SPEELLAVRR                   |
|    |               |          | 128 | 141 | 1627.9  | 1626.89 | 1626.8   | 55 | 1 | YKHSLEEDVAAHT<br>K           |
|    |               |          | 147 | 156 | 1088.71 | 1087.7  | 1087.68  | 27 | 0 | LLVALVSAFR                   |
|    |               |          | 180 | 190 | 1429.77 | 1428.76 | 1428.7   | 48 | 1 | DKEFNHEEIIIR                 |
| 5  | fiber annexin | AAC33305 | 22  | 41  | 2184.21 | 2183.2  | 2183.149 | 23 | 1 | KAFSGWGTNEGLI<br>IDILGHR     |

|   |                                        |          |     |     |         |         |          |    |   |                                            |               |
|---|----------------------------------------|----------|-----|-----|---------|---------|----------|----|---|--------------------------------------------|---------------|
|   |                                        |          | 23  | 41  | 2056.11 | 2055.11 | 2055.054 | 25 | 0 | AFSGWGTNEGLII<br>DILGHR                    |               |
|   |                                        |          | 51  | 63  | 1530.83 | 1529.83 | 1529.761 | 42 | 1 | KTYAETYGEDLLK                              |               |
|   |                                        |          | 52  | 63  | 1402.75 | 1401.74 | 1401.666 | 55 | 0 | TYAETYGEDLLK                               |               |
|   |                                        |          | 64  | 75  | 1436.75 | 1435.75 | 1435.694 | 37 | 1 | ALDKELSNDFER                               |               |
|   |                                        |          | 76  | 87  | 1395.87 | 1394.86 | 1394.792 | 47 | 0 | LVLLWALDPAER<br>LVLLWALDPAERD              |               |
|   |                                        |          | 76  | 97  | 2422.38 | 2421.37 | 2421.327 | 18 | 1 | ALLANEATK<br>RWTSSNQVLMEDIA                |               |
|   |                                        |          | 98  | 113 | 1952.01 | 1951    | 1950.94  | 31 | 1 | CTR                                        |               |
|   |                                        |          | 98  | 113 | 1967.98 | 1966.98 | 1966.935 | 21 | 1 | RWTSSNQVLMEDIA<br>CTR                      | Oxidation (M) |
|   |                                        |          | 99  | 113 | 1795.92 | 1794.91 | 1794.839 | 40 | 0 | WTSSNQVLMEDIA<br>TR                        |               |
|   |                                        |          | 99  | 113 | 1811.92 | 1810.91 | 1810.834 | 43 | 0 | WTSSNQVLMEDIA<br>TR                        | Oxidation (M) |
|   |                                        |          | 114 | 122 | 1009.56 | 1008.55 | 1008.546 | 1  | 0 | SANQLLHAR                                  |               |
|   |                                        |          | 132 | 146 | 1713.85 | 1712.85 | 1712.775 | 41 | 0 | SLEEDVAHHTTGD<br>FR                        |               |
|   |                                        |          | 132 | 147 | 1841.96 | 1840.95 | 1840.87  | 46 | 1 | SLEEDVAHHTTGD<br>FRK                       |               |
|   |                                        |          | 294 | 305 | 1375.81 | 1374.8  | 1374.678 | 87 | 1 | AIVKDTHGDIYEK<br>AVAVLSSNEGVSG             |               |
| 4 | copper/zinc<br>superoxide<br>dismutase | FJ415203 | 4   | 38  | 3425.82 | 3424.81 | 3424.7   | 32 | 0 | TVFFSQEGDGPTT<br>VTGNLSGLK<br>AGLHGFHVHALG |               |
|   |                                        |          | 39  | 68  | 3100.52 | 3099.51 | 3099.46  | 16 | 0 | DITNGCMSTGPHF<br>NPAGK                     |               |

|   |                                        |          |     |     |         |         |         |    |   |                                            |               |
|---|----------------------------------------|----------|-----|-----|---------|---------|---------|----|---|--------------------------------------------|---------------|
|   |                                        |          | 39  | 68  | 3116.53 | 3115.52 | 3115.45 | 22 | 0 | AGLHGFHVHALG<br>DITNGCMSTGPHF<br>NPAGK     | Oxidation (M) |
|   |                                        |          | 69  | 78  | 1153.52 | 1152.51 | 1152.48 | 26 | 0 | EHGAPEDENR<br>EHGAPEDENRHA                 |               |
|   |                                        |          | 69  | 101 | 3470.63 | 3469.63 | 3469.51 | 34 | 1 | GDLGNVTVGDDG<br>CASFSITDK                  |               |
|   |                                        |          | 79  | 101 | 2336.07 | 2335.07 | 2335.04 | 12 | 0 | HAGDLGNVTVGD<br>DGCASFSITDK                |               |
|   |                                        |          | 102 | 114 | 1365.81 | 1364.8  | 1364.78 | 21 | 0 | QIPLTGPNIIIGR                              |               |
|   |                                        |          | 115 | 127 | 1335.72 | 1334.71 | 1334.68 | 14 | 0 | AVVVHADPDDLK<br>K                          |               |
|   |                                        |          | 115 | 134 | 2044.05 | 2043.05 | 2043.04 | 4  | 1 | AVVVHADPDDLK<br>KGGHELK                    |               |
|   |                                        |          | 143 | 152 | 987.56  | 986.55  | 986.52  | 30 | 0 | VACGIIGLQG<br>AVAVLSSNEGVSG                |               |
| 7 | copper/zinc<br>superoxide<br>dismutase | FJ415203 | 4   | 38  | 3425.75 | 3424.74 | 3424.7  | 11 | 0 | TVFFSQEGDGPTT<br>VTGNLSGLK<br>AGLHGFHVHALG |               |
|   |                                        |          | 39  | 68  | 3100.46 | 3099.46 | 3099.46 | 0  | 0 | DITNGCMSTGPHF<br>NPAGK                     |               |
|   |                                        |          | 39  | 68  | 3116.47 | 3115.46 | 3115.45 | 3  | 0 | AGLHGFHVHALG<br>DITNGCMSTGPHF<br>NPAGK     | Oxidation (M) |
|   |                                        |          | 69  | 78  | 1153.5  | 1152.49 | 1152.48 | 8  | 0 | EHGAPEDENR<br>EHGAPEDENRHA                 |               |
|   |                                        |          | 69  | 101 | 3470.57 | 3469.56 | 3469.51 | 14 | 1 | GDLGNVTVGDDG<br>CASFSITDK                  |               |



|   |                     |          |     |     |         |         |         |    |   |                                                         |
|---|---------------------|----------|-----|-----|---------|---------|---------|----|---|---------------------------------------------------------|
|   |                     |          | 79  | 101 | 2336.05 | 2335.04 | 2335.04 | 0  | 0 | HAGDLGNVTVGD<br>DGCASFSITDK                             |
|   |                     |          | 102 | 114 | 1365.8  | 1364.79 | 1364.78 | 7  | 0 | QIPLTGPNSIIGR                                           |
|   |                     |          | 115 | 127 | 1335.7  | 1334.69 | 1334.68 | 7  | 0 | AVVVHADPDDLK<br>K                                       |
|   |                     |          | 115 | 134 | 2044.04 | 2043.03 | 2043.04 | -4 | 1 | AVVVHADPDDLK<br>KGGHELK                                 |
|   |                     |          | 143 | 152 | 987.55  | 986.54  | 986.52  | 20 | 0 | VACGIIGLQG<br>APIAVGDVLPDGT                             |
| 8 | peroxiredoxin       | FJ415174 | 2   | 36  | 3598.12 | 3597.11 | 3596.84 | 75 | 1 | LSYFDADDKLQV<br>SVHSLAAGK<br>KVIIFGVPGAFTPT<br>CSLK     |
|   |                     |          | 37  | 54  | 1935.13 | 1934.12 | 1934.07 | 25 | 1 | VIIFGVPGAFTPT<br>SLK                                    |
|   |                     |          | 38  | 54  | 1807.05 | 1806.04 | 1805.97 | 33 | 0 | HVPGFIEK<br>FLADGSATYTHAL<br>GLELNLGDK<br>FLADGSATYTHAL |
|   |                     |          | 55  | 62  | 926.51  | 925.5   | 925.5   | 0  | 0 | FLADGSATYTHAL<br>GLELNLGDK<br>FLADGSATYTHAL             |
|   |                     |          | 100 | 121 | 2306.21 | 2305.21 | 2305.16 | 21 | 0 | GLELNLGDK<br>KGLGT<br>R                                 |
|   |                     |          | 100 | 126 | 2790.52 | 2789.51 | 2789.43 | 28 | 1 | RFALLVDDLK                                              |
|   |                     |          | 129 | 138 | 1189.75 | 1188.75 | 1188.69 | 50 | 1 | FALLVDDLK                                               |
|   |                     |          | 130 | 138 | 1033.61 | 1032.6  | 1032.59 | 19 | 0 | FALLVDDLKVK                                             |
|   |                     |          | 130 | 140 | 1260.81 | 1259.8  | 1259.75 | 39 | 1 | AANVESGGEFTVS<br>SADDILK                                |
|   |                     |          | 141 | 160 | 2010.04 | 2009.03 | 2008.96 | 34 | 0 | ALQPIFQIYGR                                             |
| 9 | dimethylmenaquinone | FJ415179 | 24  | 34  | 1305.8  | 1304.79 | 1304.72 | 53 | 0 |                                                         |

|    |                        | methyltransferase |     |     |         |         |          |     |   |                              |
|----|------------------------|-------------------|-----|-----|---------|---------|----------|-----|---|------------------------------|
|    |                        |                   | 35  | 46  | 1313.88 | 1312.88 | 1312.79  | 68  | 0 | RPVFSGPIVTLK                 |
|    |                        |                   | 47  | 55  | 1104.65 | 1103.65 | 1103.6   | 45  | 0 | VFEDNVLIR                    |
|    |                        |                   | 66  | 76  | 1071.65 | 1070.64 | 1070.61  | 28  | 0 | VLVVDGGGSLR                  |
|    |                        |                   | 104 | 116 | 1461.76 | 1460.75 | 1460.66  | 61  | 0 | DVDEINGCDIGVR                |
|    |                        |                   | 134 | 143 | 1064.66 | 1063.65 | 1063.61  | 37  | 0 | HVPITIAGTR                   |
|    |                        |                   | 144 | 161 | 2055.04 | 2054.03 | 2053.97  | 34  | 0 | ICDGEWLYADTDG<br>ILVSK       |
| 10 | benzoquinone reductase | ABN12321          | 5   | 18  | 1750.84 | 1749.83 | 1749.844 | -6  | 0 | VYIVYYSMYGHVE<br>K           |
|    |                        |                   | 58  | 81  | 2564.27 | 2563.26 | 2563.26  | 2   | 0 | SDVPVITPNDLAE<br>ADGFVFGFPTR |
|    |                        |                   | 91  | 101 | 1206.63 | 1205.63 | 1205.619 | 6   | 0 | AFLDATGGLWR                  |
|    |                        |                   | 160 | 175 | 1472.65 | 1471.65 | 1471.633 | 10  | 0 | GGSPYGAGTYAG<br>DGSR         |
|    |                        |                   | 176 | 190 | 1685.81 | 1684.81 | 1684.824 | -11 | 0 | MPSELELAQAFHQ<br>GK          |
| 13 | benzoquinone reductase | ABN12321          | 37  | 51  | 1717.94 | 1716.93 | 1716.893 | 22  | 0 | LWQVSETLSEEVL<br>GK          |
|    |                        |                   | 58  | 81  | 2564.34 | 2563.33 | 2563.26  | 28  | 0 | SDVPVITPNDLAE<br>ADGFVFGFPTR |
|    |                        |                   | 91  | 101 | 1206.67 | 1205.66 | 1205.619 | 34  | 0 | AFLDATGGLWR                  |
|    |                        |                   | 160 | 175 | 1472.7  | 1471.69 | 1471.633 | 42  | 0 | GGSPYGAGTYAG<br>DGSR         |
|    |                        |                   | 176 | 190 | 1685.88 | 1684.88 | 1684.824 | 31  | 0 | MPSELELAQAFHQ<br>GK          |
| 14 | benzoquinone reductase | ABN12320          | 5   | 18  | 1750.79 | 1749.78 | 1749.844 | -37 | 0 | VYIVYYSMYGHVE<br>K           |

|    |                        |          |     |     |         |         |          |     |   |                              |                 |
|----|------------------------|----------|-----|-----|---------|---------|----------|-----|---|------------------------------|-----------------|
| 88 | benzoquinone reductase | FJ415183 | 37  | 51  | 1727.86 | 1726.85 | 1726.914 | -35 | 0 | LWQVPETLSDEIL<br>GK          |                 |
|    |                        |          | 82  | 90  | 1046.51 | 1045.5  | 1045.473 | 26  | 0 | FGMMSAQFK                    |                 |
|    |                        |          | 91  | 101 | 1224.54 | 1223.53 | 1223.576 | -35 | 0 | AFMDATGGLWR                  |                 |
|    |                        |          | 176 | 190 | 1719.75 | 1718.75 | 1718.809 | -36 | 0 | MPSELEFAQAFH<br>QGK          |                 |
|    |                        |          | 5   | 18  | 1764.87 | 1763.86 | 1763.86  | 0   | 0 | LYIVYYSMYGHVE<br>K           |                 |
|    |                        |          | 5   | 18  | 1780.87 | 1779.87 | 1779.85  | 0   | 0 | LYIVYYSMYGHVE<br>K           | Oxidation (M)   |
|    |                        |          | 37  | 51  | 1727.94 | 1726.93 | 1726.91  | 5   | 0 | LWQVPETLSDEIL<br>GK          |                 |
|    |                        |          | 58  | 81  | 2615.35 | 2614.34 | 2614.31  | -86 | 0 | SDVPIITPHDLAEA<br>DGFIFGFPTR |                 |
|    |                        |          | 82  | 90  | 1046.49 | 1045.48 | 1045.47  | 11  | 0 | FGMMSAQFK                    |                 |
|    |                        |          | 82  | 90  | 1062.48 | 1061.47 | 1061.47  | 9   | 0 | FGMMSAQFK                    | Oxidation (M)   |
|    |                        |          | 82  | 90  | 1078.47 | 1077.47 | 1077.46  | 0   | 0 | FGMMSAQFK                    | 2 Oxidation (M) |
|    |                        |          | 82  | 101 | 2300.16 | 2299.15 | 2299.02  | 0   | 1 | FGMMSAQFKAFM<br>DATGGLWR     | 3 Oxidation (M) |
|    |                        |          | 91  | 101 | 1224.6  | 1223.59 | 1223.58  | 56  | 0 | AFMDATGGLWR                  |                 |
|    |                        |          | 91  | 101 | 1240.59 | 1239.58 | 1239.57  | 8   | 0 | AFMDATGGLWR                  | Oxidation (M)   |
| 11 | ascorbate peroxidase   | ABR18607 | 160 | 175 | 1486.67 | 1485.66 | 1485.65  | 8   | 0 | GGSPYGAGTYAG<br>DGTR         |                 |
|    |                        |          | 182 | 190 | 999.54  | 998.53  | 998.53   | 6   | 0 | LAQAFHQGK                    |                 |
|    |                        |          | 39  | 50  | 1331.76 | 1330.75 | 1330.667 | 0   | 0 | LAWHSAGTFDVK                 |                 |
|    |                        |          | 39  | 52  | 1560.92 | 1559.91 | 1559.81  | 63  | 1 | LAWHSAGTFDVK<br>TK           |                 |

|    |                      |          |     |     |         |         |          |    |   |                                |               |
|----|----------------------|----------|-----|-----|---------|---------|----------|----|---|--------------------------------|---------------|
| 12 | ascorbate peroxidase | ABR18607 | 62  | 79  | 1869.03 | 1868.02 | 1867.965 | 28 | 0 | HPAELAHAANGL<br>DIAVR          | Oxidation (M) |
|    |                      |          | 120 | 130 | 1258.68 | 1257.67 | 1257.61  | 50 | 0 | EDKPHPPPEGR                    |               |
|    |                      |          | 131 | 142 | 1309.76 | 1308.75 | 1308.679 | 54 | 1 | LPDATKGSDDLH                   |               |
|    |                      |          | 143 | 167 | 2625.33 | 2624.32 | 2624.313 | 4  | 0 | QVFS AQMGLSDQ<br>HIVALSGGHTLGR |               |
|    |                      |          | 173 | 192 | 2320.16 | 2319.16 | 2319.085 | 31 | 0 | SGFEGPWTTNPLI<br>FDNSYFK       |               |
|    |                      |          | 210 | 223 | 1612.02 | 1611.01 | 1610.94  | 47 | 0 | VLLSDPVFRPLVE<br>K             |               |
|    |                      |          | 224 | 241 | 2076.98 | 2075.97 | 2075.911 | 30 | 0 | YAADEDAFFADYT<br>EAHLK         |               |
|    |                      |          | 53  | 61  | 895.471 | 894.464 | 894.427  | 42 | 0 | TGGPFGTMK                      |               |
|    |                      |          | 62  | 79  | 1869.02 | 1868.01 | 1867.965 | 25 | 0 | HPAELAHAANGL<br>DIAVR          |               |
|    |                      |          | 120 | 130 | 1258.67 | 1257.66 | 1257.61  | 38 | 0 | EDKPHPPPEGR                    |               |
| 15 | ascorbate peroxidase | ABR18607 | 143 | 167 | 2609.42 | 2608.41 | 2608.318 | 37 | 0 | QVFS AQMGLSDQ<br>HIVALSGGHTLGR |               |
|    |                      |          | 173 | 192 | 2320.17 | 2319.16 | 2319.085 | 33 | 0 | SGFEGPWTTNPLI<br>FDNSYFK       |               |
|    |                      |          | 200 | 209 | 1113.65 | 1112.64 | 1112.608 | 28 | 0 | EGLLQLPTDK                     |               |
|    |                      |          | 224 | 241 | 2076.98 | 2075.97 | 2075.911 | 28 | 0 | YAADEDAFFADYT<br>EAHLK         |               |
|    |                      |          | 53  | 61  | 895.481 | 894.474 | 894.427  | 53 | 0 | TGGPFGTMK                      |               |
|    |                      |          | 86  | 119 | 3733.04 | 3732.03 | 3731.862 | 46 | 0 | EQFPNLTYADFYQ<br>LAGVVAVEITGGP |               |

|    |                      |          |     |     |         |         |          |     |   |               |               |
|----|----------------------|----------|-----|-----|---------|---------|----------|-----|---|---------------|---------------|
|    |                      |          |     |     |         |         |          |     |   | EIPFHPGR      |               |
|    |                      |          | 120 | 130 | 1258.68 | 1257.68 | 1257.61  | 53  | 0 | EDKPHPPPEGR   |               |
|    |                      |          | 143 | 167 | 2609.43 | 2608.42 | 2608.318 | 39  | 0 | QVFS AQMGLSDQ |               |
|    |                      |          |     |     |         |         |          |     |   | HIVALSGGHTLGR |               |
|    |                      |          | 173 | 192 | 2320.18 | 2319.17 | 2319.085 | 37  | 0 | SGFEGPWTTNPLI |               |
|    |                      |          |     |     |         |         |          |     |   | FDNSYFK       |               |
|    |                      |          | 224 | 241 | 2076.99 | 2075.98 | 2075.911 | 34  | 0 | YAADEDAFFADYT |               |
|    |                      |          |     |     |         |         |          |     |   | EHLK          |               |
| 16 | ascorbate peroxidase | ABR18607 | 39  | 50  | 1331.66 | 1330.65 | 1330.67  | -7  | 0 | LAWHSAGTFDVK  |               |
|    |                      |          |     |     |         |         |          |     |   | TGGPFGTMKHPA  |               |
|    |                      |          | 53  | 79  | 2761.33 | 2760.32 | 2760.38  | -18 | 1 | ELAHAANGLDIA  | Oxidation (M) |
|    |                      |          |     |     |         |         |          |     |   | VR            |               |
|    |                      |          | 62  | 79  | 1868.95 | 1867.94 | 1867.97  | -10 | 0 | HPAELAHAANGL  |               |
|    |                      |          |     |     |         |         |          |     |   | DI AVR        |               |
|    |                      |          | 120 | 130 | 1258.62 | 1257.61 | 1257.61  | 0   | 0 | EDKPHPPPEGR   |               |
|    |                      |          | 173 | 192 | 2320.06 | 2319.06 | 2319.08  | -12 | 0 | SGFEGPWTTNPLI |               |
|    |                      |          |     |     |         |         |          |     |   | FDNSYFK       |               |
|    |                      |          | 193 | 209 | 1869.97 | 1868.97 | 1869.01  | -21 | 1 | ELLSGEKEGLLQL |               |
|    |                      |          |     |     |         |         |          |     |   | PTDK          |               |
|    |                      |          | 200 | 209 | 1113.62 | 1112.62 | 1112.61  | 8   | 0 | EGLLQLPTDK    |               |
|    |                      |          | 210 | 223 | 1611.95 | 1610.94 | 1610.94  | 0   | 0 | VLLSDPVFRPLVE |               |
|    |                      |          |     |     |         |         |          |     |   | K             |               |
|    |                      |          | 224 | 241 | 2076.9  | 2075.89 | 2075.91  | -9  | 0 | YAADEDAFFADYT |               |
|    |                      |          |     |     |         |         |          |     |   | EHLK          |               |
| 19 | ascorbate peroxidase | ABR18607 | 39  | 50  | 1331.71 | 1330.7  | 1330.667 | 27  | 0 | LAWHSAGTFDVK  |               |
|    |                      |          | 53  | 79  | 2761.41 | 2760.4  | 2760.377 | 9   | 1 | TGGPFGTMKHPA  | Oxidation (M) |

|    |                         |          |     |         |         |          |          |    |                                    |                    |  |
|----|-------------------------|----------|-----|---------|---------|----------|----------|----|------------------------------------|--------------------|--|
|    |                         |          |     |         |         |          |          |    | ELAHAANGLDIA<br>VR                 |                    |  |
|    |                         | 62       | 79  | 1869.02 | 1868.01 | 1867.965 | 25       | 0  | HPAELAHAANGL<br>DIAVR              |                    |  |
|    |                         | 120      | 130 | 1258.66 | 1257.65 | 1257.61  | 34       | 0  | EDKPHPPPEGR                        |                    |  |
|    |                         | 131      | 142 | 1309.73 | 1308.72 | 1308.679 | 34       | 1  | LPDATKGS DHLR                      |                    |  |
|    |                         | 173      | 192 | 2320.1  | 2319.09 | 2319.085 | 3        | 0  | SGFEGPWTTNPLI<br>FDNSYFK           |                    |  |
|    |                         | 200      | 223 | 2706.63 | 2705.62 | 2705.537 | 32       | 1  | EGLLQLPTDKVLL<br>SDPVFRPLVEK       |                    |  |
|    |                         | 210      | 223 | 1612    | 1610.99 | 1610.94  | 33       | 0  | VLLSDPVFRPLVE<br>K                 |                    |  |
|    |                         | 224      | 241 | 2076.96 | 2075.95 | 2075.911 | 20       | 0  | YAADEDAFFADYT<br>EAHLK             |                    |  |
| 20 | ascorbate<br>peroxidase | ABR18607 | 25  | 38      | 1585.89 | 1584.88  | 1584.848 | 22 | 1                                  | GLIAEKNCAPLML<br>R |  |
|    |                         | 39       | 50  | 1331.71 | 1330.7  | 1330.667 | 27       | 0  | LAWHSAGTFDVK<br>TGGPFGTMKHPA       |                    |  |
|    |                         | 53       | 79  | 2745.42 | 2744.41 | 2744.382 | 11       | 1  | ELAHAANGLDIA<br>VR                 |                    |  |
|    |                         | 53       | 79  | 2761.41 | 2760.4  | 2760.377 | 9        | 1  | TGGPFGTMKHPA<br>ELAHAANGLDIA<br>VR | Oxidation (M)      |  |
|    |                         | 62       | 79  | 1869.02 | 1868.01 | 1867.965 | 25       | 0  | HPAELAHAANGL<br>DIAVR              |                    |  |
|    |                         | 120      | 130 | 1258.64 | 1257.63 | 1257.61  | 18       | 0  | EDKPHPPPEGR                        |                    |  |
|    |                         | 131      | 142 | 1309.73 | 1308.72 | 1308.679 | 34       | 1  | LPDATKGS DHLR                      |                    |  |
|    |                         | 137      | 167 | 3274.73 | 3273.72 | 3273.643 | 24       | 1  | GSDHLRQVFS AQ                      |                    |  |

|    |                      |          |     |         |         |          |          |    |               |               |  |
|----|----------------------|----------|-----|---------|---------|----------|----------|----|---------------|---------------|--|
|    |                      |          |     |         |         |          |          |    | MGLSDQHIVALSG |               |  |
|    |                      |          |     |         |         |          |          |    | GHTLGR        |               |  |
|    |                      |          |     |         |         |          |          |    | GSDHLRQVFSQAQ |               |  |
|    |                      | 137      | 167 | 3290.72 | 3289.71 | 3289.638 | 23       | 1  | MGLSDQHIVALSG | Oxidation (M) |  |
|    |                      |          |     |         |         |          |          |    | GHTLGR        |               |  |
|    |                      | 143      | 167 | 2609.31 | 2608.3  | 2608.318 | -6       | 0  | QVFS AQMGLSDQ |               |  |
|    |                      |          |     |         |         |          |          |    | HIVALSGGHTLGR |               |  |
|    |                      | 143      | 167 | 2625.33 | 2624.32 | 2624.313 | 4        | 0  | QVFS AQMGLSDQ | Oxidation (M) |  |
|    |                      |          |     |         |         |          |          |    | HIVALSGGHTLGR |               |  |
|    |                      | 173      | 192 | 2320.1  | 2319.09 | 2319.085 | 3        | 0  | SGFEGPWTTNPLI |               |  |
|    |                      |          |     |         |         |          |          |    | FDNSYFK       |               |  |
|    |                      | 210      | 223 | 1612    | 1610.99 | 1610.94  | 33       | 0  | VLLSDPVFRPLVE |               |  |
|    |                      |          |     |         |         |          |          |    | K             |               |  |
|    |                      | 224      | 241 | 2076.96 | 2075.95 | 2075.911 | 20       | 0  | YAADEDAFFADYT |               |  |
|    |                      |          |     |         |         |          |          |    | EAHLK         |               |  |
|    |                      | 224      | 250 | 2980.44 | 2979.43 | 2979.345 | 29       | 1  | YAADEDAFFADYT |               |  |
|    |                      |          |     |         |         |          |          |    | EAHLKLSELGFAD |               |  |
|    |                      |          |     |         |         |          |          |    | A             |               |  |
| 21 | ascorbate peroxidase | ABR18607 | 39  | 50      | 1331.73 | 1330.72  | 1330.667 | 43 | 0             | LAWHSAGTFDVK  |  |
|    |                      |          | 39  | 52      | 1560.86 | 1559.85  | 1559.81  | 29 | 1             | LAWHSAGTFDVK  |  |
|    |                      |          |     |         |         |          |          |    | TK            |               |  |
|    |                      |          | 53  | 79      | 2736.42 | 2735.41  | 2735.381 | 10 | 1             | TGGPFGTMKQPA  |  |
|    |                      |          |     |         |         |          |          |    | ELAHAANGLDIA  |               |  |
|    |                      |          |     |         |         |          |          |    | VR            |               |  |
|    |                      |          | 53  | 79      | 2752.43 | 2751.42  | 2751.376 | 17 | 1             | TGGPFGTMKQPA  |  |
|    |                      |          |     |         |         |          |          |    | ELAHAANGLDIA  | Oxidation (M) |  |
|    |                      |          |     |         |         |          |          |    | VR            |               |  |

|    |                                 |          |     |     |         |         |          |     |   |                                          |                   |
|----|---------------------------------|----------|-----|-----|---------|---------|----------|-----|---|------------------------------------------|-------------------|
|    |                                 |          | 62  | 79  | 1860.01 | 1859    | 1858.965 | 20  | 0 | QPAELAHAANGL<br>DIAVR                    |                   |
|    |                                 |          | 120 | 130 | 1258.67 | 1257.66 | 1257.61  | 41  | 0 | EDKPHPPPEGR                              |                   |
|    |                                 |          | 131 | 142 | 1293.7  | 1292.7  | 1292.647 | 38  | 0 | LPNATEGADHLR                             |                   |
|    |                                 |          | 143 | 167 | 2630.32 | 2629.31 | 2629.292 | 8   | 0 | QVFSNQMGSLDQ<br>DIVALSGGHTLGR            |                   |
|    |                                 |          | 143 | 167 | 2646.34 | 2645.33 | 2645.287 | 17  | 0 | QVFSNQMGSLDQ<br>DIVALSGGHTLGR            | Oxidation (M)     |
|    |                                 |          | 173 | 192 | 2320.13 | 2319.12 | 2319.085 | 16  | 0 | SGFEGPWTTNPLI<br>FDNSYFK                 |                   |
|    |                                 |          | 210 | 241 | 3655.97 | 3654.96 | 3654.825 | 38  | 1 | VLLSDPVFRPLVD<br>KYAADEDAFFADY<br>TEAHLK |                   |
|    |                                 |          | 224 | 241 | 2076.95 | 2075.95 | 2075.911 | 17  | 0 | YAADEDAFFADYT<br>EAHLK                   |                   |
|    |                                 |          | 242 | 250 | 922.438 | 921.431 | 921.4444 | -14 | 0 | LSELGFADA<br>EQLPILSYADFYQL              |                   |
| 17 | ascorbate<br>peroxidase         | FJ415185 | 86  | 119 | 3683.56 | 3682.55 | 3682.9   | -95 | 0 | AGVVAVEITGGPEI<br>PFHPGR                 |                   |
|    |                                 |          | 120 | 130 | 1258.54 | 1257.53 | 1257.61  | -63 | 0 | EDKPHPPPEGR                              |                   |
|    |                                 |          | 131 | 142 | 1293.58 | 1292.57 | 1292.65  | -61 | 0 | LPNATEGADHLR                             |                   |
|    |                                 |          | 173 | 192 | 2319.92 | 2318.91 | 2319.08  | -73 | 0 | SGFEGPWTTNPLI<br>FDNSYFK                 |                   |
|    |                                 |          | 224 | 241 | 2076.77 | 2075.77 | 2075.91  | -72 | 0 | YAADEDAFFADYT<br>EAHLK                   |                   |
| 38 | stromal ascorbate<br>peroxidase | FJ415186 | 131 | 138 | 1613.77 | 1612.76 | 1612.74  | 12  | 0 | FCHPILVR                                 | TMPP <sup>c</sup> |
|    |                                 |          | 139 | 149 | 1261.54 | 1260.54 | 1260.59  | -39 | 0 | LGWHDAGTYNK                              |                   |



|    |                                 |          |     |     |         |         |         |     |   |                               |      |
|----|---------------------------------|----------|-----|-----|---------|---------|---------|-----|---|-------------------------------|------|
|    |                                 |          | 150 | 156 | 1515.66 | 1514.65 | 1514.64 | 6   | 0 | NIEEWPR                       | TMPP |
|    |                                 |          | 166 | 171 | 1336.63 | 1335.62 | 1335.59 | 22  | 0 | FEVELK                        | TMPP |
|    |                                 |          | 192 | 216 | 3131.36 | 3130.35 | 3130.43 | -25 | 0 | YSGVTYADLFQLA<br>SATAIEEAGGPK | TMPP |
|    |                                 |          | 238 | 251 | 1970.94 | 1969.93 | 1969.92 | 5   | 0 | LPAAGPPSPADHL<br>R            | TMPP |
|    |                                 |          | 252 | 256 | 1285.57 | 1284.56 | 1284.53 | 23  | 0 | EVFYR                         | TMPP |
|    |                                 |          | 293 | 309 | 2356.03 | 2355.02 | 2355.05 | -12 | 0 | DGPGAPGGQSWT<br>VQWLK         | TMPP |
|    |                                 |          | 323 | 342 | 2835.27 | 2834.26 | 2834.31 | -17 | 0 | DEDLLVLPTDAVL<br>FEDPSFK      | TMPP |
|    |                                 |          | 343 | 347 | 1181.4  | 1180.39 | 1180.5  | -93 | 0 | VYAEK                         | TMPP |
|    |                                 |          | 348 | 357 | 1277.54 | 1276.53 | 1276.56 | -23 | 0 | YAEDQETFFK                    |      |
|    |                                 |          | 348 | 357 | 1849.75 | 1848.74 | 1848.74 | 0   | 0 | YAEDQETFFK                    | TMPP |
|    |                                 |          | 366 | 372 | 1274.62 | 1273.61 | 1273.59 | 23  | 0 | LSNLGAK                       | TMPP |
| 40 | stromal ascorbate<br>peroxidase | FJ415186 | 2   | 15  | 1448.83 | 1447.82 | 1447.84 | -13 | 0 | ADPVVASHLSLVL<br>K            |      |
|    |                                 |          | 131 | 138 | 1041.6  | 1040.59 | 1040.56 | 28  | 0 | FCHPILVR                      |      |
|    |                                 |          | 139 | 149 | 1261.64 | 1260.63 | 1260.59 | 31  | 0 | LGWHDAGTYNK                   |      |
|    |                                 |          | 150 | 156 | 943.49  | 942.48  | 942.46  | 21  | 0 | NIEEWPR                       |      |
|    |                                 |          | 224 | 237 | 1544.72 | 1543.71 | 1543.66 | 38  | 0 | VDVSGPNECPEE<br>GR            |      |
|    |                                 |          | 238 | 251 | 1398.79 | 1397.78 | 1397.74 | 28  | 0 | LPAAGPPSPADHL<br>R            |      |
|    |                                 |          | 323 | 342 | 2263.19 | 2262.18 | 2262.13 | 22  | 0 | DEDLLVLPTDAVL<br>FEDPSFK      |      |
|    |                                 |          | 348 | 357 | 1277.61 | 1276.61 | 1276.56 | 39  | 0 | YAEDQETFFK                    |      |
|    |                                 |          | 358 | 365 | 904.44  | 903.43  | 903.41  | 22  | 0 | DYAEAHAK                      |      |

|    |                                    |          |     |     |         |         |         |     |   |                             |             |
|----|------------------------------------|----------|-----|-----|---------|---------|---------|-----|---|-----------------------------|-------------|
| 22 | $\alpha$ -1,4 glucan phosphorylase | FJ415211 | 153 | 176 | 2807.39 | 2806.38 | 2806.39 | -3  | 1 | LASCFLDSLATLN               |             |
|    |                                    |          |     |     |         |         |         |     |   |                             | YPAWGYGLRYR |
|    |                                    |          | 216 | 227 | 1329.76 | 1328.75 | 1328.66 | 67  | 1 | FYGKVLTDSDGK                |             |
|    |                                    |          | 344 | 362 | 2225.22 | 2224.21 | 2224.08 | 58  | 0 | VAVQMNDTHPTL<br>CIPELMR     |             |
|    |                                    |          | 578 | 588 | 1261.59 | 1260.58 | 1260.66 | -63 | 1 | FQNKTNGVTPR                 |             |
|    |                                    |          | 713 | 721 | 998.53  | 997.52  | 997.52  | 0   | 0 | AFATYVQAK                   |             |
|    |                                    |          | 713 | 722 | 1154.65 | 1153.64 | 1153.62 | 17  | 1 | AFATYVQAKR                  |             |
|    |                                    |          | 726 | 745 | 2140.15 | 2139.14 | 2139.08 | 28  | 0 | FITDVGATVNHDP<br>DIGDLLK    |             |
|    |                                    |          | 805 | 818 | 1615.82 | 1614.81 | 1614.76 | 37  | 0 | EEVGEENFFLFGA<br>K          |             |
|    |                                    |          | 805 | 826 | 2463.22 | 2462.21 | 2462.22 | -4  | 1 | EEVGEENFFLFGA<br>KAHEIAGLR  |             |
|    |                                    |          | 819 | 827 | 994.59  | 993.58  | 993.57  | 10  | 1 | AHEIAGLRK                   |             |
|    |                                    |          | 834 | 845 | 1462.83 | 1461.83 | 1461.75 | 54  | 1 | FVPDPQFEEVKK                |             |
|    |                                    |          | 849 | 872 | 2490.23 | 2489.22 | 2489.15 | 28  | 0 | SGVFGSSNYNELL<br>GSLEGNEGFR |             |
|    |                                    |          | 873 | 880 | 912.49  | 911.48  | 911.48  | 0   | 0 | ADYFLVGK                    |             |
|    |                                    |          | 873 | 891 | 2309.13 | 2308.13 | 2308.07 | 21  | 1 | ADYFLVGKDFPSY<br>IECQEK     |             |
|    |                                    |          | 881 | 891 | 1415.68 | 1414.68 | 1414.61 | 49  | 0 | DFPSYIECQEK                 |             |
|    |                                    |          | 881 | 897 | 2151.16 | 2150.15 | 2149.95 | 93  | 1 | DFPSYIECQEKVD<br>ETYK       |             |
|    |                                    |          | 905 | 920 | 1780.84 | 1779.83 | 1779.76 | 39  | 0 | MSIMNTAGSYNFS<br>SDR        |             |
|    |                                    |          | 921 | 927 | 889.45  | 888.44  | 888.45  | 0   | 0 | TIHEYAR                     |             |
|    |                                    |          | 928 | 938 | 1337.82 | 1336.82 | 1336.74 | 59  | 0 | EIWNIKPVLP                  |             |

|    |                                  |          |     |     |         |         |         |     |   |                                 |
|----|----------------------------------|----------|-----|-----|---------|---------|---------|-----|---|---------------------------------|
| 23 | s-formylglutathione<br>hydrolase | FJ415188 | 73  | 89  | 1625.84 | 1624.84 | 1624.84 | -6  | 0 | AASAEGVALIAPD<br>TSPR           |
|    |                                  |          | 119 | 128 | 1373.58 | 1372.57 | 1372.66 | -65 | 1 | NWRMYDYVVK                      |
|    |                                  |          | 133 | 145 | 1491.72 | 1490.72 | 1490.76 | -33 | 0 | LLENFPQLDTSK<br>SASAFAPIANPINC  |
|    |                                  |          | 171 | 189 | 2028.91 | 2027.9  | 2027.99 | -44 | 0 | PWGQK                           |
|    |                                  |          | 200 | 212 | 1569.67 | 1568.66 | 1568.72 | -31 | 0 | AAWEEYDATCLIK<br>FHNVSATILIDQGE |
|    |                                  |          | 214 | 230 | 1901.85 | 1900.85 | 1900.92 | -36 | 0 | DDK                             |
|    |                                  |          | 231 | 240 | 1212.63 | 1211.63 | 1211.67 | -33 | 0 | FLHDQLLAQK                      |
|    |                                  |          | 241 | 255 | 1802.86 | 1801.85 | 1801.95 | -55 | 1 | FEEACRSVNVPLL<br>LR             |
|    |                                  |          | 247 | 255 | 1010.6  | 1009.59 | 1009.63 | -29 | 0 | SVNVPLLLR                       |
|    |                                  |          | 256 | 276 | 2571.09 | 2570.08 | 2570.22 | -54 | 0 | LQPGYDHSYFFIS<br>TFIDHIR        |
| 24 | triosephosphate<br>isomerase     | FJ415177 | 4   | 12  | 1082.59 | 1081.58 | 1081.57 | 9   | 1 | KFFVGGNWK                       |
|    |                                  |          | 5   | 12  | 954.51  | 953.5   | 953.48  | 31  | 0 | FFVGGNWK<br>IVSTLNAGEVPSQ       |
|    |                                  |          | 23  | 53  | 3278.89 | 3277.88 | 3277.82 | 18  | 0 | DVVEVVVSPPFVF<br>LPLVK          |
|    |                                  |          | 54  | 70  | 2028.96 | 2027.95 | 2028    | -24 | 0 | TSLRPDFHVAQN<br>CWVK            |
|    |                                  |          | 71  | 99  | 3097.67 | 3096.66 | 3096.61 | 19  | 1 | KGGAFTGEVSAE<br>MLVNLSIPWVIIGH  |
|    |                                  |          | 105 | 123 | 2053.03 | 2052.02 | 2052.05 | -14 | 1 | SER<br>ESNEFVADKVAYA<br>LAQGLK  |

|    |                                       |          |     |     |         |         |         |     |   |                                 |
|----|---------------------------------------|----------|-----|-----|---------|---------|---------|-----|---|---------------------------------|
|    |                                       |          | 114 | 123 | 1033.63 | 1032.62 | 1032.6  | 29  | 0 | VAYALAQGLK                      |
|    |                                       |          | 124 | 135 | 1388.73 | 1387.72 | 1387.71 | 7   | 0 | VIACIGETLEQR                    |
|    |                                       |          | 155 | 175 | 2319.17 | 2318.16 | 2318.19 | -12 | 0 | ISNWTDVVLAYEP<br>VWAIGTGK       |
|    |                                       |          | 176 | 190 | 1708.84 | 1707.83 | 1707.84 | 0   | 0 | VATPAQAQEVHC<br>ELR             |
|    |                                       |          | 176 | 191 | 1836.91 | 1835.9  | 1835.93 | -16 | 1 | VATPAQAQEVHC<br>ELRK            |
|    |                                       |          | 191 | 206 | 1756.92 | 1755.91 | 1755.93 | -5  | 1 | KWLQANVSPEVA<br>ASTR            |
|    |                                       |          | 192 | 206 | 1628.82 | 1627.81 | 1627.83 | -12 | 0 | WLQANVSPEVAA<br>STR             |
|    |                                       |          | 207 | 219 | 1353.69 | 1352.68 | 1352.68 | 7   | 0 | IYGGSVTANCK                     |
|    |                                       |          | 220 | 246 | 2842.45 | 2841.44 | 2841.52 | -24 | 0 | ELAAQPDVDGFLV<br>GGASLKPEFIDIIK |
| 25 | 20S proteasome<br>subunit $\alpha$ -1 | FJ415181 | 4   | 21  | 1905.96 | 1904.95 | 1904.91 | 20  | 1 | GSGGGYDRHITIF<br>SPEGR          |
|    |                                       |          | 12  | 21  | 1156.64 | 1155.63 | 1155.6  | 25  | 0 | HITIFSPEGR                      |
|    |                                       |          | 22  | 30  | 1144.62 | 1143.61 | 1143.6  | 17  | 0 | LFQVEYAFK                       |
|    |                                       |          | 22  | 33  | 1442.86 | 1441.85 | 1441.8  | 41  | 1 | LFQVEYAFKAVK                    |
|    |                                       |          | 75  | 88  | 1436.82 | 1435.81 | 1435.75 | 41  | 0 | FLGLLATGMTADA<br>R              |
|    |                                       |          | 89  | 102 | 1632.9  | 1631.89 | 1631.84 | 30  | 1 | TLVQQARNEAAEF<br>R              |
|    |                                       |          | 96  | 104 | 1139.59 | 1138.58 | 1138.55 | 26  | 1 | NEAAEFRFR                       |
|    |                                       |          | 103 | 116 | 1703.9  | 1702.89 | 1702.84 | 29  | 1 | FRYGYEMPVDVL<br>SK              |
|    |                                       |          | 154 | 164 | 1288.6  | 1287.59 | 1287.55 | 38  | 0 | CDPAGHFYGHK                     |

|    |                          |          |     |     |         |         |         |    |   |                                  |
|----|--------------------------|----------|-----|-----|---------|---------|---------|----|---|----------------------------------|
|    |                          |          | 165 | 181 | 1822.96 | 1821.95 | 1821.91 | 21 | 1 | ATSAGSKEQEAIN<br>FLEK            |
|    |                          |          | 229 | 246 | 2057.05 | 2056.04 | 2056    | 24 | 1 | VLSTEEIDEHLTAI<br>SERD           |
| 26 | heat shock protein<br>70 | FJ415196 | 5   | 28  | 2588.28 | 2587.27 | 2587.21 | 23 | 0 | GEGPAIGIDLGTTY<br>SCVGVWQHDR     |
|    |                          |          | 29  | 39  | 1228.68 | 1227.67 | 1227.62 | 40 | 0 | VEIANDQGNR                       |
|    |                          |          | 40  | 52  | 1473.74 | 1472.74 | 1472.68 | 40 | 0 | TTPSYVGFTDTER                    |
|    |                          |          | 117 | 130 | 1565.88 | 1564.87 | 1564.82 | 31 | 0 | QFAAEEISSMVLK                    |
|    |                          |          | 133 | 144 | 1340.72 | 1339.72 | 1339.7  | 7  | 0 | EIAEAYLGFTVK                     |
|    |                          |          | 145 | 159 | 1680.89 | 1679.89 | 1679.83 | 35 | 0 | NAVVTVPAYFNDS<br>QR              |
|    |                          |          | 164 | 175 | 1215.7  | 1214.69 | 1214.64 | 41 | 0 | DAGVIAGLNVMR                     |
|    |                          |          | 227 | 242 | 1675.79 | 1674.78 | 1674.72 | 29 | 0 | ATAGDTHLGGED<br>FDNR             |
|    |                          |          | 243 | 252 | 1278.71 | 1277.71 | 1277.62 | 62 | 0 | MVNHFVQEFK                       |
| 68 | heat shock protein<br>70 | FJ415196 | 243 | 253 | 1434.74 | 1433.73 | 1433.72 | 6  | 1 | MVNHFVQEFKR                      |
|    |                          |          | 258 | 267 | 1098.62 | 1097.61 | 1097.59 | 18 | 1 | DISGNPRALR                       |
|    |                          |          | 278 | 305 | 3195.7  | 3194.69 | 3194.6  | 28 | 1 | RTLSSTAQTTIEID<br>SLYEGIDFYTTITR |
|    |                          |          | 279 | 305 | 3039.57 | 3038.56 | 3038.5  | 23 | 0 | TLSSTAQTTIEIDS<br>LYEGIDFYTTITR  |
|    |                          |          | 306 | 317 | 1540.79 | 1539.78 | 1539.75 | 19 | 1 | ARFEELNMDLFR                     |
|    |                          |          | 308 | 317 | 1313.64 | 1312.63 | 1312.61 | 15 | 0 | FEELNMDLFR                       |
|    |                          |          | 308 | 318 | 1441.74 | 1440.74 | 1440.71 | 20 | 1 | FEELNMDLFRK                      |
|    |                          |          | 332 | 348 | 1786.94 | 1785.93 | 1785.9  | 16 | 1 | MDKSSVHDVVLV<br>GGSTR            |

|     |                          |          |         |         |         |         |                        |     |   |                                                 |
|-----|--------------------------|----------|---------|---------|---------|---------|------------------------|-----|---|-------------------------------------------------|
| 63  | heat shock protein<br>70 | FJ415199 | 335     | 348     | 1412.77 | 1411.76 | 1411.74                | 14  | 0 | SSVHDVVLVGGST<br>R                              |
|     |                          |          | 352     | 363     | 1436.78 | 1435.77 | 1435.75                | 13  | 0 | VQQLLQDFFNK                                     |
|     |                          |          | 431     | 453     | 2658.27 | 2657.27 | 2657.26                | 0   | 0 | EQVFSTYSDNQP<br>GVLIQVYEGER                     |
|     |                          |          | 476     | 499     | 2575.37 | 2574.36 | 2574.26                | 38  | 0 | GVPQITVCFDIDA<br>NGILNVSAEDK                    |
|     |                          |          | 507     | 515     | 1017.58 | 1016.57 | 1016.56                | 9   | 1 | ITITNDKGR                                       |
|     |                          |          | 546     | 556     | 1374.63 | 1373.62 | 1373.6                 | 14  | 0 | NSLENYAYNMR                                     |
|     |                          |          | 604     | 615     | 1386.74 | 1385.73 | 1385.72                | 7   | 0 | ELESICNPIIAK                                    |
|     |                          |          | 308     | 317     | 1313.68 | 1312.67 | 1312.61                | 45  | 0 | FEELNMDLFR                                      |
|     |                          |          | 335     | 348     | 1412.8  | 1411.79 | 1411.74                | 35  | 0 | SSVHDVVLVGGST<br>R                              |
|     |                          |          | 368     | 393     | 2574.33 | 2573.32 | 2573.26                | 23  | 0 | SINPDEAVAYGAA<br>VQAAILSSEGNEK<br>VQDLLLDVTPLSL |
|     |                          |          | 394     | 422     | 3033.5  | 3032.5  | 3032.72                | -72 | 0 | GLETAGGVMTVLI<br>PR                             |
|     |                          |          | 431     | 453     | 2658.34 | 2657.33 | 2657.26                | 26  | 0 | EQVFSTYSDNQP<br>GVLIQVYEGER                     |
|     |                          |          | 546     | 556     | 1358.66 | 1357.65 | 1357.61                | 29  | 0 | NALENYAYNMR                                     |
|     |                          |          | 576     | 601     | 2905.4  | 2904.39 | 2904.33                | 20  | 0 | IEDAIDGAIQWLDG<br>NQLAEAEDEFEDK                 |
|     |                          |          | 604     | 615     | 1386.79 | 1385.78 | 1385.72                | 43  | 0 | ELESICNPIIAK<br>MYQGAGADMGG                     |
| 616 | 643                      | 2612.14  | 2611.13 | 2611.06 | 26      | 0       | GMDDEDAPPTGGS<br>SAGPK |     |   |                                                 |

|    |                          |          |     |     |         |         |         |     |   |                                                 |
|----|--------------------------|----------|-----|-----|---------|---------|---------|-----|---|-------------------------------------------------|
| 67 | heat shock protein<br>70 | FJ415194 | 306 | 317 | 1540.83 | 1539.82 | 1539.75 | 45  | 1 | ARFEELNMDLFR                                    |
|    |                          |          | 308 | 318 | 1441.78 | 1440.77 | 1440.71 | 41  | 1 | FEELNMDLFRK                                     |
|    |                          |          | 335 | 348 | 1426.83 | 1425.82 | 1425.76 | 49  | 0 | STVHDVVLVGGST<br>R                              |
|    |                          |          | 352 | 367 | 1967.09 | 1966.08 | 1966    | 40  | 1 | VQQLLQDFFNGK<br>ELCK                            |
|    |                          |          | 368 | 393 | 2571.3  | 2570.29 | 2570.23 | 23  | 0 | SINPDEAVACGAA<br>VQAAILSSEGNEK<br>VQDLLLLDVTPLS |
|    |                          |          | 394 | 422 | 3007.77 | 3006.76 | 3006.67 | 29  | 0 | SGLETAGGVMTVL<br>IPR                            |
|    |                          |          | 431 | 453 | 2658.33 | 2657.33 | 2657.26 | 22  | 0 | EQVFSTYSDNQP<br>GVLIQVYEGER                     |
|    |                          |          | 431 | 455 | 2915.51 | 2914.51 | 2914.41 | 34  | 1 | EQVFSTYSDNQP<br>GVLIQVYEGERTR                   |
| 90 | heat shock protein<br>70 | FJ415194 | 546 | 556 | 1358.68 | 1357.67 | 1357.61 | 44  | 0 | NALENYAYNMR                                     |
|    |                          |          | 5   | 28  | 2588.14 | 2587.13 | 2587.21 | -30 | 0 | GEGPAIGIDLGTTY<br>SCVGVWQHDR                    |
|    |                          |          | 29  | 39  | 1228.6  | 1227.59 | 1227.62 | -24 | 0 | VEIANDQGNR                                      |
|    |                          |          | 40  | 52  | 1473.67 | 1472.66 | 1472.68 | -13 | 0 | TTPSYVGFTDTER<br>NQVAMNPINTVFD                  |
|    |                          |          | 60  | 74  | 1661.82 | 1660.81 | 1660.82 | -6  | 0 | AK                                              |
|    |                          |          | 97  | 112 | 1718.78 | 1717.78 | 1717.89 | -64 | 0 | VIAGPGDKPMICV<br>AYK                            |
|    |                          |          | 145 | 159 | 1680.81 | 1679.81 | 1679.83 | -11 | 0 | NAVVTVPAYFNDS<br>QR                             |
|    |                          |          | 164 | 175 | 1215.62 | 1214.61 | 1214.64 | -24 | 0 | DAGVIAGLNVMR                                    |

|    |                          |          |     |     |         |         |         |     |   |                               |
|----|--------------------------|----------|-----|-----|---------|---------|---------|-----|---|-------------------------------|
|    |                          |          | 227 | 242 | 1675.71 | 1674.7  | 1674.72 | -11 | 0 | ATAGDTHLGGED                  |
|    |                          |          |     |     |         |         |         |     |   | FDNR                          |
|    |                          |          | 243 | 252 | 1278.66 | 1277.66 | 1277.62 | 31  | 0 | MVNHFVQEFK                    |
| 73 | heat shock protein<br>70 | FJ415195 | 306 | 317 | 1540.81 | 1539.8  | 1539.75 | 32  | 1 | ARFEELNMDLFR                  |
|    |                          |          | 335 | 348 | 1412.76 | 1411.76 | 1411.74 | 7   | 0 | SSVHDVVLVGGST<br>R            |
|    |                          |          | 352 | 367 | 1967.06 | 1966.05 | 1966    | 25  | 1 | VQQLLQDFFNGK<br>ELCK          |
|    |                          |          | 431 | 453 | 2658.3  | 2657.29 | 2657.26 | 11  | 0 | EQVFSTYSDNQP<br>GVLIQVYEGER   |
|    |                          |          | 431 | 455 | 2915.48 | 2914.47 | 2914.41 | 20  | 1 | EQVFSTYSDNQP<br>GVLIQVYEGERTR |
|    |                          |          | 507 | 515 | 1017.56 | 1016.55 | 1016.56 | -9  | 1 | ITITNDKGR                     |
|    |                          |          | 546 | 556 | 1358.66 | 1357.65 | 1357.61 | 29  | 0 | NALENYAYNMR                   |
|    |                          |          | 546 | 560 | 1800.99 | 1799.98 | 1799.86 | 66  | 1 | NALENYAYNMRN<br>TVK           |
| 27 | catalase                 | FJ415187 | 92  | 102 | 1150.7  | 1149.69 | 1149.69 | 0   | 0 | APGVQTPVILR                   |
|    |                          |          | 118 | 129 | 1456.81 | 1455.8  | 1455.76 | 27  | 2 | DPRGFAVKFYTR                  |
|    |                          |          | 151 | 163 | 1493.88 | 1492.88 | 1492.79 | 60  | 0 | FPDMVHALKPNPK                 |
|    |                          |          | 292 | 305 | 1620.99 | 1619.99 | 1619.87 | 74  | 0 | TWPEDILPLQPVG<br>R            |
|    |                          |          | 340 | 353 | 1712.06 | 1711.05 | 1710.91 | 81  | 1 | LLQTRIFSYADTQ<br>R            |
|    |                          |          | 356 | 369 | 1495.95 | 1494.94 | 1494.82 | 80  | 0 | LGPNYLQLPANAP<br>K            |
|    |                          |          | 387 | 396 | 1269.65 | 1268.64 | 1268.57 | 55  | 0 | DEEINYFPSR                    |
|    |                          |          | 387 | 401 | 1900.05 | 1899.05 | 1898.88 | 89  | 1 | DEEINYFPSRYDP                 |



|    |                                        |          |     |     |         |         |         |    |    |                             |               |
|----|----------------------------------------|----------|-----|-----|---------|---------|---------|----|----|-----------------------------|---------------|
|    |                                        |          |     |     |         |         |         |    | VR |                             |               |
|    |                                        |          | 397 | 416 | 2329.31 | 2328.31 | 2328.11 | 81 | 1  | YDPVRHAEMFPIP<br>PAVCTGR    | Oxidation (M) |
|    |                                        |          | 402 | 416 | 1682.95 | 1681.94 | 1681.81 | 77 | 0  | HAEMFPIPPAVCT<br>GR         |               |
|    |                                        |          | 402 | 416 | 1698.95 | 1697.94 | 1697.8  | 82 | 0  | HAEMFPIPPAVCT<br>GR         | Oxidation (M) |
|    |                                        |          | 420 | 434 | 1862.04 | 1861.03 | 1860.92 | 64 | 2  | CIIEKENNFKQPG<br>ER         |               |
|    |                                        |          | 435 | 445 | 1437.83 | 1436.82 | 1436.69 | 90 | 2  | YRSWAADRQER                 |               |
|    |                                        |          | 437 | 445 | 1118.62 | 1117.61 | 1117.53 | 80 | 1  | SWAADRQER                   |               |
|    |                                        |          | 450 | 458 | 1072.65 | 1071.64 | 1071.53 | 93 | 0  | WVEALSDPR                   |               |
|    |                                        |          | 450 | 464 | 1808.07 | 1807.06 | 1806.94 | 66 | 1  | WVEALSDPRVTH<br>EIR         |               |
| 28 | serine<br>hydroxymethyltransf<br>erase | FJ415180 | 59  | 67  | 1010.46 | 1009.45 | 1009.43 | 19 | 0  | YSEGMPGNR                   |               |
|    |                                        |          | 68  | 83  | 1991.98 | 1990.98 | 1990.87 | 50 | 0  | YYGGNEFIDEIENL<br>CR        |               |
|    |                                        |          | 86  | 96  | 1240.75 | 1239.74 | 1239.66 | 64 | 0  | AIQAFHLDPTK<br>WGVNVQPYSGSP |               |
|    |                                        |          | 97  | 123 | 2945.58 | 2944.57 | 2944.43 | 50 | 0  | ANFAAYTAVLQPH<br>DR         |               |
|    |                                        |          | 124 | 145 | 2261.19 | 2260.18 | 2260.09 | 39 | 0  | IMGLDLPSGGHLT<br>HGYYTSGGK  |               |
|    |                                        |          | 147 | 160 | 1618.92 | 1617.91 | 1617.83 | 49 | 0  | ISATSIYFESLPYK              |               |
|    |                                        |          | 177 | 183 | 846.48  | 845.48  | 845.48  | 0  | 0  | ALDFRPK                     |               |
|    |                                        |          | 184 | 194 | 1206.7  | 1205.69 | 1205.62 | 58 | 0  | LIICGGSAYPR                 |               |

|    |                                        |          |     |     |         |         |         |     |   |                                     |               |
|----|----------------------------------------|----------|-----|-----|---------|---------|---------|-----|---|-------------------------------------|---------------|
|    |                                        |          | 195 | 200 | 825.34  | 824.34  | 824.35  | -12 | 0 | DWDYAR                              |               |
| 31 | serine<br>hydroxymethyltransf<br>erase | FJ415180 | 59  | 67  | 1010.43 | 1009.42 | 1009.43 | -9  | 0 | YSEGMPGNR                           |               |
|    |                                        |          | 68  | 83  | 1991.86 | 1990.86 | 1990.87 | -10 | 0 | YYGGNEFIDEIENL<br>CR                |               |
|    |                                        |          | 86  | 96  | 1240.64 | 1239.63 | 1239.66 | -24 | 0 | AIQAFHLDPTK<br>WGVNVQPYSGSP         |               |
|    |                                        |          | 97  | 123 | 2945.42 | 2944.41 | 2944.43 | -3  | 0 | ANFAAYTAVLQPH<br>DR                 |               |
|    |                                        |          | 124 | 145 | 2261.08 | 2260.08 | 2260.09 | -8  | 0 | IMGLDLPSGGHLT<br>HGYYTSGGK          |               |
|    |                                        |          | 124 | 145 | 2277.07 | 2276.07 | 2276.09 | -8  | 0 | IMGLDLPSGGHLT<br>HGYYTSGGK          | Oxidation (M) |
|    |                                        |          | 147 | 160 | 1618.84 | 1617.83 | 1617.83 | 0   | 0 | ISATSIYFESLPYK                      |               |
|    |                                        |          | 161 | 176 | 1874.89 | 1873.88 | 1873.89 | -5  | 1 | VNSTTGYIDYDKL<br>EEK                |               |
|    |                                        |          | 184 | 194 | 1206.63 | 1205.63 | 1205.62 | 0   | 0 | LIICGGSAYPR                         |               |
|    |                                        |          | 195 | 200 | 825.34  | 824.33  | 824.35  | -12 | 0 | DWDYAR                              |               |
|    |                                        |          | 265 | 278 | 1640.81 | 1639.81 | 1639.74 | 42  | 1 | KGQPEDAVYDFE<br>DK                  |               |
|    |                                        |          | 333 | 359 | 2951.44 | 2950.43 | 2950.57 | -47 | 0 | GYQLVTGGTENH<br>LVLWDLRPLGLTG<br>NK |               |
| 29 | lactoylglutathione<br>lyase            | FJ415204 | 40  | 48  | 1182.48 | 1181.48 | 1181.49 | -8  | 0 | FYTECFGMK                           |               |
|    |                                        |          | 40  | 48  | 1198.48 | 1197.47 | 1197.48 | -16 | 0 | FYTECFGMK                           | Oxidation (M) |
|    |                                        |          | 126 | 147 | 2411.22 | 2410.22 | 2410.25 | -16 | 1 | GGSSVIAFVKDPD                       |               |



|    |      |     |     |         |         |         |     |   |                |
|----|------|-----|-----|---------|---------|---------|-----|---|----------------|
|    |      |     |     |         |         |         |     |   | ISLESDIANVKPTH |
|    |      | 50  | 83  | 3748.79 | 3747.78 | 3747.84 | -16 | 0 | VFNAAGVTGRPN   |
|    |      |     |     |         |         |         |     |   | VDWCESHK       |
|    |      | 89  | 102 | 1518.81 | 1517.8  | 1517.79 | 6   | 0 | TNVVGTTLTADVC  |
|    |      |     |     |         |         |         |     |   | R              |
|    |      | 89  | 104 | 1761.92 | 1760.91 | 1760.91 | 5   | 1 | TNVVGTTLTADVC  |
|    |      |     |     |         |         |         |     |   | RDK            |
|    |      | 133 | 146 | 1633.8  | 1632.79 | 1632.73 | 36  | 0 | EEDTPNFIGSFYS  |
|    |      |     |     |         |         |         |     |   | K              |
|    |      | 149 | 156 | 932.45  | 931.44  | 931.5   | -64 | 0 | AMVEELLK       |
|    |      | 157 | 165 | 1168.51 | 1167.5  | 1167.53 | -25 | 0 | NYENVCTLR      |
|    |      | 166 | 178 | 1455.78 | 1454.77 | 1454.77 | 6   | 1 | VRMPISSDLANPR  |
|    |      | 168 | 178 | 1200.58 | 1199.57 | 1199.6  | -25 | 0 | MPISSDLANPR    |
|    |      | 214 | 237 | 2804.31 | 2803.3  | 2803.38 | -24 | 0 | NLTGIWNFTNPGV  |
|    |      |     |     |         |         |         |     |   | VSHNEILEMYR    |
|    |      | 238 | 247 | 1298.61 | 1297.6  | 1297.6  | 7   | 0 | DYIDPNFTWK     |
|    |      | 248 | 256 | 1092.49 | 1091.49 | 1091.52 | -36 | 0 | NFNLEEQAK      |
|    |      | 248 | 262 | 1727.98 | 1726.98 | 1726.94 | 23  | 1 | NFNLEEQAKVIVA  |
|    |      |     |     |         |         |         |     |   | PR             |
|    |      | 272 | 283 | 1417.84 | 1416.83 | 1416.82 | 0   | 1 | LKTEFPELLSIK   |
|    |      | 274 | 283 | 1176.64 | 1175.63 | 1175.64 | -17 | 0 | TEFPELLSIK     |
|    |      | 289 | 295 | 896.42  | 895.41  | 895.44  | -44 | 0 | YVFEPNK        |
|    |      | 289 | 296 | 1024.49 | 1023.49 | 1023.54 | -48 | 1 | YVFEPNKK       |
| 33 | UER1 |     |     |         |         |         |     |   |                |
|    |      | 21  | 30  | 1001.55 | 1000.54 | 1000.57 | -29 | 0 | TGWIGLLGK      |
|    |      | 31  | 45  | 1733.79 | 1732.79 | 1732.74 | 28  | 0 | LCESQGIDYEYGS  |
|    |      |     |     |         |         |         |     |   | GR             |
|    |      | 50  | 83  | 3748.88 | 3747.87 | 3747.84 | 8   | 0 | ISLESDIANVKPTH |
|    |      |     |     |         |         |         |     |   | VFNAAGVTGRPN   |

|    |              |          |    |    |         |         |         |    |                |                |
|----|--------------|----------|----|----|---------|---------|---------|----|----------------|----------------|
|    |              |          |    |    |         |         |         |    | VDWCESHK       |                |
|    |              |          |    |    |         |         |         |    | TNVVGTTLADVC   |                |
|    |              |          |    |    |         |         |         |    | R              |                |
|    |              |          |    |    |         |         |         |    | TNVVGTTLADVC   |                |
|    |              |          |    |    |         |         |         |    | RDK            |                |
|    |              |          |    |    |         |         |         |    | AMVEELLK       |                |
|    |              |          |    |    |         |         |         |    | NYENVCTLR      |                |
|    |              |          |    |    |         |         |         |    | VRMPISSDLANPR  |                |
|    |              |          |    |    |         |         |         |    | MPISSDLANPR    |                |
|    |              |          |    |    |         |         |         |    | VVNIPNSMTILDEL |                |
|    |              |          |    |    |         |         |         |    | LPISIEMGKR     |                |
|    |              |          |    |    |         |         |         |    | NLTGIWNFTNPGV  |                |
|    |              |          |    |    |         |         |         |    | VSHNEILEMYR    |                |
|    |              |          |    |    |         |         |         |    | DYIDPNFTWK     |                |
|    |              |          |    |    |         |         |         |    | NFNLEEQAK      |                |
|    |              |          |    |    |         |         |         |    | LKTEFPELLSIK   |                |
|    |              |          |    |    |         |         |         |    | YVFEPNKK       |                |
| 34 | fructokinase | FJ415169 | 41 | 55 | 1334.78 | 1333.78 | 1333.75 | 22 | 0              | APGGAPANVAIAV  |
|    |              |          |    |    |         |         |         |    |                | AR             |
|    |              |          |    |    |         |         |         |    |                | APGGAPANVAIAV  |
|    |              |          |    |    |         |         |         |    |                | ARLGGK         |
|    |              |          |    |    |         |         |         |    |                | QNGVSGDGILFDQ  |
|    |              |          |    |    |         |         |         |    |                | GAR            |
|    |              |          |    |    |         |         |         |    |                | TALAFVTLR      |
|    |              |          |    |    |         |         |         |    |                | ADGEREFMFYR    |
|    |              |          |    |    |         |         |         |    |                | VFHYGSISLIVEPC |
|    |              |          |    |    |         |         |         |    |                | R              |
|    |              |          |    |    |         |         |         |    |                | GAGALLSYDPNLR  |

|    |         |          |     |     |         |         |          |     |   |                                                                                                                                                                |
|----|---------|----------|-----|-----|---------|---------|----------|-----|---|----------------------------------------------------------------------------------------------------------------------------------------------------------------|
|    |         |          | 178 | 188 | 1254.68 | 1253.67 | 1253.64  | 23  | 0 | LPLWPSADEAR                                                                                                                                                    |
|    |         |          | 178 | 189 | 1382.78 | 1381.78 | 1381.74  | 28  | 1 | LPLWPSADEARK                                                                                                                                                   |
|    |         |          | 190 | 202 | 1528.9  | 1527.89 | 1527.87  | 13  | 1 | QILSIWDKADIVK                                                                                                                                                  |
|    |         |          | 203 | 216 | 1537.8  | 1536.8  | 1536.77  | 19  | 0 | VSDVELEFLTGSN<br>K                                                                                                                                             |
|    |         |          | 217 | 224 | 908.38  | 907.37  | 907.4    | -33 | 0 | VDEETAMK                                                                                                                                                       |
|    |         |          | 225 | 240 | 1900.16 | 1899.15 | 1899.1   | 26  | 0 | LWRPNFTLLLVTL<br>GEK<br>NFRGAVDAFHVN                                                                                                                           |
|    |         |          | 248 | 277 | 3139.74 | 3138.74 | 3138.52  | 70  | 1 | TVDTTGAGDSFV<br>GALLCK<br>GAVDAFHVNTVDT                                                                                                                        |
|    |         |          | 251 | 277 | 2722.33 | 2721.32 | 2721.31  | 7   | 0 | TGAGDSFVGALLC<br>K                                                                                                                                             |
|    |         |          | 278 | 292 | 1740    | 1738.99 | 1738.95  | 23  | 1 | IVENPTILEDEAKL<br>R                                                                                                                                            |
| 35 | enolase | ABW21688 | 206 | 227 | 2323.92 | 2322.91 | 2323.035 | -54 | 0 | YGQDATNVGDEG<br>GFAPNIQENK<br>VIGMDVAASEFY<br>GTDK<br>SFVAEYPIVSIEDP<br>FDQDDWEHYSK<br>VQIVGDDLLVTNP<br>K<br>VNQIGSVTESIEAV<br>K<br>SGETEDTFIADLS<br>VGLATGQIK |
|    |         |          | 246 | 262 | 1801.8  | 1800.79 | 1800.86  | -37 | 0 |                                                                                                                                                                |
|    |         |          | 290 | 314 | 3016.2  | 3015.2  | 3015.345 | -49 | 0 |                                                                                                                                                                |
|    |         |          | 323 | 336 | 1510.8  | 1509.8  | 1509.84  | -30 | 0 |                                                                                                                                                                |
|    |         |          | 354 | 368 | 1573.8  | 1572.79 | 1572.836 | -29 | 0 |                                                                                                                                                                |
|    |         |          | 383 | 404 | 2252.02 | 2251.01 | 2251.122 | -48 | 0 |                                                                                                                                                                |

|    |       |          |     |     |         |         |          |     |   |                                        |                 |
|----|-------|----------|-----|-----|---------|---------|----------|-----|---|----------------------------------------|-----------------|
|    |       |          | 423 | 439 | 1811.81 | 1810.81 | 1810.874 | -38 | 0 | IEEELGAEAVYAG<br>ASFR                  |                 |
| 36 | actin | AAP73454 | 21  | 30  | 976.47  | 975.463 | 975.441  | 22  | 0 | AGFAGDDAPR                             |                 |
|    |       |          | 42  | 52  | 1176.55 | 1175.54 | 1175.543 | 0   | 0 | HTGVMVGMGQK                            | 2 Oxidation (M) |
|    |       |          | 87  | 97  | 1515.76 | 1514.75 | 1514.742 | 7   | 0 | IWHHTFYNELR                            |                 |
|    |       |          | 98  | 115 | 1954.07 | 1953.06 | 1953.057 | 3   | 0 | VAPEEHPVLLTEA<br>PLNPK                 |                 |
|    |       |          | 150 | 179 | 3151.68 | 3150.67 | 3150.635 | 12  | 0 | TTGIVLDSGDGVS<br>HTVPIYEGYALPH<br>AILR |                 |
|    |       |          | 194 | 208 | 1804.96 | 1803.95 | 1803.883 | 39  | 1 | ILTERGYMFTTTA<br>ER                    | Oxidation (M)   |
|    |       |          | 199 | 208 | 1192.57 | 1191.56 | 1191.523 | 33  | 0 | GYMFTTTAER                             | Oxidation (M)   |
|    |       |          | 218 | 233 | 1855.91 | 1854.9  | 1854.925 | -12 | 0 | LAYVALDYEQELE<br>TAK                   |                 |
|    |       |          | 234 | 256 | 2479.2  | 2478.19 | 2478.224 | -13 | 1 | SSSSVEKKNYELPD<br>GQVITIGAER           |                 |
|    |       |          | 241 | 256 | 1774.9  | 1773.89 | 1773.89  | 2   | 0 | NYELPDGQVITIGA<br>ER                   |                 |
|    |       |          | 287 | 314 | 3014.59 | 3013.58 | 3013.453 | 43  | 1 | CDVDITKDLYGNIV<br>LSGGSTMFPGIAD<br>R   |                 |
|    |       |          | 362 | 374 | 1445.68 | 1444.67 | 1444.658 | 10  | 0 | GEYDESGPSIVHR<br>YPIEHGIVSNWDD         |                 |
| 52 | actin | AAP73452 | 71  | 86  | 1932.81 | 1931.81 | 1931.87  | -36 | 0 | MEK                                    |                 |
|    |       |          | 87  | 97  | 1515.73 | 1514.73 | 1514.74  | -13 | 0 | IWHHTFYNELR                            |                 |
|    |       |          | 98  | 115 | 1954.01 | 1953    | 1953.06  | -25 | 0 | VAPEEHPVLLTEA<br>PLNPK                 |                 |

|    |       |          |     |     |         |         |          |     |   |                                       |                 |
|----|-------|----------|-----|-----|---------|---------|----------|-----|---|---------------------------------------|-----------------|
|    |       |          | 218 | 233 | 1855.9  | 1854.89 | 1854.93  | -16 | 0 | LAYVALDYEQELE<br>TAK                  |                 |
|    |       |          | 241 | 256 | 1774.87 | 1773.86 | 1773.89  | -16 | 0 | NYELPDGQVITIGA<br>ER                  |                 |
|    |       |          | 294 | 314 | 2183.02 | 2182.01 | 2182.07  | -27 | 0 | DLYGNIVLSGGST<br>MFPGIADR             |                 |
|    |       |          | 362 | 374 | 1445.65 | 1444.64 | 1444.66  | -6  | 0 | GEYDESGPSIVHR                         |                 |
| 53 | actin | AAP73457 | 42  | 52  | 1176.56 | 1175.55 | 1175.543 | 8   | 0 | HTGVMVGMGQK                           | 2 Oxidation (M) |
|    |       |          | 53  | 64  | 1338.66 | 1337.65 | 1337.621 | 24  | 1 | DAYVGDEAQSQR                          |                 |
|    |       |          | 71  | 86  | 1932.89 | 1931.88 | 1931.872 | 5   | 0 | YPIEHGIVSNWDD<br>MEK                  |                 |
|    |       |          | 71  | 86  | 1948.9  | 1947.89 | 1947.867 | 13  | 0 | YPIEHGIVSNWDD<br>MEK                  | Oxidation (M)   |
|    |       |          | 71  | 97  | 3445.53 | 3444.52 | 3444.599 | -22 | 1 | YPIEHGIVSNWDD<br>MEKIWHHTFYNEL<br>R   | Oxidation (M)   |
|    |       |          | 87  | 97  | 1515.78 | 1514.77 | 1514.742 | 20  | 0 | IWHHTFYNELR                           |                 |
|    |       |          | 98  | 115 | 1954.08 | 1953.07 | 1953.057 | 8   | 0 | VAPEEHPVLLTEA<br>PLNPK                |                 |
|    |       |          | 150 | 179 | 3151.61 | 3150.6  | 3150.635 | -10 | 0 | TTGIVLDSDGVS<br>HTVPIYEGYALPH<br>AILR |                 |
|    |       |          | 180 | 193 | 1547.78 | 1546.77 | 1546.803 | -19 | 1 | LDLAGRDLTDSL<br>K                     |                 |
|    |       |          | 180 | 193 | 1563.83 | 1562.82 | 1562.797 | 16  | 1 | LDLAGRDLTDSL<br>K                     | Oxidation (M)   |
|    |       |          | 186 | 193 | 922.5   | 921.493 | 921.4477 | 49  | 0 | DLTDSL<br>MK                          |                 |
|    |       |          | 199 | 208 | 1192.57 | 1191.56 | 1191.523 | 33  | 0 | GYMFTTTAER                            | Oxidation (M)   |



|    |       |          |     |     |         |         |          |    |   |                                |               |
|----|-------|----------|-----|-----|---------|---------|----------|----|---|--------------------------------|---------------|
|    |       |          | 199 | 212 | 1673.9  | 1672.89 | 1672.824 | 41 | 1 | GYMFTTTAEREIV<br>R             |               |
|    |       |          | 199 | 212 | 1689.85 | 1688.84 | 1688.819 | 14 | 1 | GYMFTTTAEREIV<br>R             | Oxidation (M) |
|    |       |          | 218 | 233 | 1855.94 | 1854.93 | 1854.925 | 4  | 0 | LAYVALDYEQELE<br>TAK           |               |
|    |       |          | 234 | 256 | 2479.22 | 2478.21 | 2478.224 | -4 | 1 | SSSSVEKNYELPD<br>GQVITIGAER    |               |
|    |       |          | 241 | 256 | 1774.9  | 1773.89 | 1773.89  | 2  | 0 | NYELPDGQVITIGA<br>ER           |               |
|    |       |          | 287 | 293 | 905.5   | 904.493 | 904.4436 | 54 | 1 | CDVDIRK                        |               |
|    |       |          | 293 | 314 | 2311.16 | 2310.15 | 2310.168 | -7 | 1 | KDLYGNIVLSGGS<br>TMFPGIADR     |               |
|    |       |          | 293 | 314 | 2327.15 | 2326.14 | 2326.163 | -9 | 1 | KDLYGNIVLSGGS<br>TMFPGIADR     | Oxidation (M) |
|    |       |          | 294 | 314 | 2183.08 | 2182.07 | 2182.073 | 0  | 0 | DLYGNIVLSGGST<br>MFPGIADR      |               |
|    |       |          | 294 | 314 | 2199.08 | 2198.07 | 2198.068 | 2  | 0 | DLYGNIVLSGGST<br>MFPGIADR      | Oxidation (M) |
|    |       |          | 318 | 328 | 1147.63 | 1146.62 | 1146.595 | 24 | 0 | EITALAPSSMK                    |               |
|    |       |          | 318 | 328 | 1163.63 | 1162.62 | 1162.59  | 28 | 0 | EITALAPSSMK                    | Oxidation (M) |
|    |       |          | 329 | 337 | 1008.64 | 1007.63 | 1007.613 | 20 | 1 | IKVVAPPER                      |               |
|    |       |          | 331 | 338 | 895.54  | 894.533 | 894.5287 | 5  | 1 | VVAPPERK                       |               |
|    |       |          | 362 | 374 | 1445.69 | 1444.68 | 1444.658 | 17 | 0 | GEYDESGPSIVHR<br>GEYDESGPSIVHR |               |
|    |       |          | 362 | 375 | 1573.8  | 1572.79 | 1572.753 | 25 | 1 | K                              |               |
| 71 | actin | AAP73460 | 21  | 30  | 976.5   | 975.493 | 975.441  | 53 | 0 | AGFAGDDAPR                     |               |
|    |       |          | 31  | 41  | 1198.79 | 1197.78 | 1197.698 | 71 | 0 | AVFPSIVGRPR                    |               |

|     |     |         |         |          |     |   |                                        |                 |
|-----|-----|---------|---------|----------|-----|---|----------------------------------------|-----------------|
| 42  | 52  | 1144.62 | 1143.61 | 1143.553 | 52  | 0 | HTGVMVGMGQK                            |                 |
| 42  | 52  | 1160.64 | 1159.63 | 1159.548 | 73  | 0 | HTGVMVGMGQK                            | Oxidation (M)   |
| 42  | 52  | 1176.6  | 1175.59 | 1175.543 | 43  | 0 | HTGVMVGMGQK                            | 2 Oxidation (M) |
| 53  | 64  | 1338.71 | 1337.7  | 1337.621 | 61  | 1 | DAYVGDEAQSKR                           |                 |
| 87  | 97  | 1515.83 | 1514.82 | 1514.742 | 53  | 0 | IWHHTFYNELR                            |                 |
| 98  | 115 | 1954.16 | 1953.15 | 1953.057 | 49  | 0 | VAPEEHPVLLTEA<br>PLNPK                 |                 |
| 150 | 179 | 3151.76 | 3150.75 | 3150.635 | 37  | 0 | TTGIVLDSGDGVS<br>HTVPIYEGYALPH<br>AILR |                 |
| 180 | 193 | 1531.88 | 1530.87 | 1530.808 | 43  | 1 | LDLAGRDLTDALM<br>K                     |                 |
| 180 | 193 | 1547.89 | 1546.88 | 1546.803 | 52  | 1 | LDLAGRDLTDALM<br>K                     | Oxidation (M)   |
| 199 | 208 | 1192.61 | 1191.6  | 1191.523 | 67  | 0 | GYMFTTTAER                             | Oxidation (M)   |
| 199 | 212 | 1673.91 | 1672.9  | 1672.824 | 47  | 1 | GYMFTTTAEREIV<br>R                     |                 |
| 218 | 233 | 1856.02 | 1855.01 | 1854.925 | 47  | 0 | LAYVALDYEQELE<br>TAK                   |                 |
| 234 | 256 | 2479.3  | 2478.29 | 2478.224 | 28  | 1 | SSSSVEKNYELPD<br>GQVITIGAER            |                 |
| 241 | 256 | 1774.98 | 1773.97 | 1773.89  | 47  | 0 | NYELPDGQVITIGA<br>ER                   |                 |
| 241 | 258 | 2077.88 | 2076.87 | 2077.059 | -90 | 1 | NYELPDGQVITIGA<br>ERFR                 |                 |
| 294 | 314 | 2183.16 | 2182.15 | 2182.073 | 37  | 0 | DLYGNIVLSGGST<br>MFPGIADR              |                 |
| 294 | 314 | 2199.16 | 2198.15 | 2198.068 | 39  | 0 | DLYGNIVLSGGST                          | Oxidation (M)   |

|    |                                  |          |     |         |         |          |         |     |                    |                               |
|----|----------------------------------|----------|-----|---------|---------|----------|---------|-----|--------------------|-------------------------------|
|    |                                  |          |     |         |         |          |         |     | MFPGIADR           |                               |
|    |                                  | 329      | 337 | 1008.67 | 1007.66 | 1007.613 | 50      | 1   | IKVVAPPER          |                               |
|    |                                  | 362      | 374 | 1445.75 | 1444.74 | 1444.658 | 58      | 0   | GEYDESGPSIVHR      |                               |
|    |                                  | 362      | 375 | 1573.86 | 1572.85 | 1572.753 | 63      | 1   | GEYDESGPSIVHR<br>K |                               |
| 37 | granule bound<br>starch synthase | FJ415189 | 336 | 344     | 1028.57 | 1027.57  | 1027.57 | 0   | 0                  | K.GVELDNIIR.K                 |
|    |                                  |          | 386 | 398     | 1443.67 | 1442.66  | 1442.68 | -13 | 0                  | K.EAIQGEVGLPC<br>DR.D         |
|    |                                  |          | 399 | 408     | 1086.62 | 1085.61  | 1085.62 | -9  | 0                  | R.DVPLIGFIGR.L                |
|    |                                  |          | 414 | 424     | 1113.59 | 1112.59  | 1112.61 | -17 | 0                  | K.GSDILAEAIK.L                |
|    |                                  |          | 425 | 439     | 1572.78 | 1571.77  | 1571.83 | -38 | 0                  | K.LAAENCQIVVLG<br>TGK.K       |
|    |                                  |          | 441 | 458     | 2205.97 | 2204.96  | 2205.04 | -36 | 0                  | K.AMENQIEQLEIQ<br>YPDNRV.A    |
|    |                                  |          | 463 | 483     | 2313.14 | 2312.13  | 2312.24 | -43 | 0                  | K.FNVPLAHMIIAG<br>ADYILVPSR.F |
|    |                                  |          | 497 | 514     | 1776.93 | 1775.92  | 1775.97 | -28 | 0                  | R.YGTVPIVASTGG<br>LVDTVK.E    |
| 39 | granule bound<br>starch synthase | FJ415205 | 131 | 142     | 1361.82 | 1360.81  | 1360.69 | 95  | 0                  | DAWDTSVLVDLK                  |
|    |                                  |          | 318 | 335     | 1998.04 | 1997.03  | 1997    | 15  | 0                  | VLTVSPYYAQELV<br>SGEDK        |
|    |                                  |          | 336 | 344     | 1028.59 | 1027.59  | 1027.57 | 19  | 0                  | GVELDNIIR                     |
|    |                                  |          | 346 | 366     | 2232.07 | 2231.06  | 2231.05 | 4   | 0                  | TGITGIVNGMDVQ<br>EWNPASDK     |
|    |                                  |          | 372 | 379     | 928.49  | 927.49   | 927.44  | 53  | 0                  | YDATTVMK                      |
|    |                                  |          | 386 | 408     | 2426.28 | 2425.27  | 2425.23 | 16  | 0                  | EALQAEVGLPCD                  |



|    |                      |          |     |     |         |         |         |     |   |  | GADK           |
|----|----------------------|----------|-----|-----|---------|---------|---------|-----|---|--|----------------|
|    |                      |          |     |     |         |         |         |     |   |  | WPLGWPVGGFPG   |
|    |                      |          | 141 | 165 | 2662.29 | 2661.28 | 2661.25 | 15  | 0 |  | PQGPYYCGVGAD   |
|    |                      |          |     |     |         |         |         |     |   |  | K              |
|    |                      |          | 166 | 177 | 1423.74 | 1422.73 | 1422.69 | 28  | 1 |  | SFGRDIVDSHYK   |
|    |                      |          | 269 | 276 | 899.58  | 898.57  | 898.56  | 11  | 1 |  | AIEKLGLR       |
|    |                      |          | 277 | 290 | 1610.8  | 1609.79 | 1609.76 | 18  | 1 |  | HKEHIAAYGEGNE  |
|    |                      |          |     |     |         |         |         |     |   |  | R              |
| 42 | malate dehydrogenase | FJ415192 | 56  | 67  | 1918.89 | 1917.88 | 1917.91 | -15 | 0 |  | MELVDAAFPLLK   |
|    |                      |          | 101 | 105 | 1151.36 | 1150.35 | 1150.45 | -86 | 0 |  | DVMSK          |
|    |                      |          | 106 | 111 | 1295.64 | 1294.63 | 1294.58 | 46  | 0 |  | NVSIYK         |
|    |                      |          | 143 | 151 | 1531.69 | 1530.69 | 1530.69 | -6  | 0 |  | EFAPSIPAK      |
|    |                      |          | 164 | 171 | 1417.64 | 1416.63 | 1416.65 | -14 | 0 |  | ALGQISEK       |
|    |                      |          | 172 | 180 | 1573.74 | 1572.73 | 1572.74 | 0   | 0 |  | LNVQVSDVK      |
|    |                      |          | 216 | 231 | 2465.13 | 2464.12 | 2464.09 | 12  | 0 |  | DDAWLNGEFITTV  |
|    |                      |          |     |     |         |         |         |     |   |  | QQR            |
|    |                      |          | 232 | 237 | 1144.57 | 1143.56 | 1143.55 | 8   | 0 |  | GAAIIK         |
|    |                      |          | 313 | 324 | 1947.84 | 1946.84 | 1946.87 | -15 | 0 |  | LDLTGQELTEEK   |
|    |                      |          | 325 | 332 | 1514.61 | 1513.6  | 1513.6  | 0   | 0 |  | ELAYSCLS       |
| 56 | malate dehydrogenase | FJ415192 | 56  | 67  | 1346.72 | 1345.71 | 1345.73 | -14 | 0 |  | MELVDAAFPLLK   |
|    |                      |          |     |     |         |         |         |     |   |  | GVVATTDVVEACT  |
|    |                      |          | 68  | 93  | 2605.2  | 2604.19 | 2604.3  | -42 | 0 |  | GVNVAVMVGFP    |
|    |                      |          |     |     |         |         |         |     |   |  | R              |
|    |                      |          | 127 | 142 | 1649.97 | 1648.96 | 1648.99 | -18 | 0 |  | VLVVANPANTNALI |
|    |                      |          |     |     |         |         |         |     |   |  | LK             |
|    |                      |          | 143 | 151 | 959.53  | 958.52  | 958.51  | 10  | 0 |  | EFAPSIPAK      |

|    |                                                               |          |     |     |         |         |          |     |   |               |               |
|----|---------------------------------------------------------------|----------|-----|-----|---------|---------|----------|-----|---|---------------|---------------|
|    |                                                               |          | 181 | 211 | 3420.49 | 3419.49 | 3419.67  | -52 | 0 | NVIIWGNHSSSQY |               |
|    |                                                               |          |     |     |         |         |          |     |   | PDVNHATVMTPS  |               |
|    |                                                               |          |     |     |         |         |          |     |   | GEKPVR        |               |
|    |                                                               |          | 216 | 231 | 1892.85 | 1891.84 | 1891.91  | -31 | 0 | DDAWLNGEFITTV |               |
|    |                                                               |          |     |     |         |         |          |     |   | QQR           |               |
|    |                                                               |          | 241 | 256 | 1629.77 | 1628.76 | 1628.79  | -18 | 0 | LSSALSAASAACD |               |
|    |                                                               |          |     |     |         |         |          |     |   | HIR           |               |
|    |                                                               |          | 294 | 310 | 1934.9  | 1933.89 | 1933.95  | -31 | 0 | NGEWTIVQGLAID |               |
|    |                                                               |          |     |     |         |         |          |     |   | EFSR          |               |
| 43 | phenylcoumaran<br>benzylic ether<br>reductase-like<br>protein | ABN12322 | 19  | 36  | 2034.14 | 2033.13 | 2033.074 | 27  | 1 | FIVEASAKEGHPT |               |
|    |                                                               |          |     |     |         |         |          |     |   | FVFVR         |               |
|    |                                                               |          | 27  | 36  | 1188.65 | 1187.65 | 1187.609 | 31  | 0 | EGHPTFVFVR    |               |
|    |                                                               |          | 48  | 72  | 2885.57 | 2884.56 | 2884.479 | 29  | 1 | LVDNFKNLGVHLL | Oxidation (M) |
|    |                                                               |          |     |     |         |         |          |     |   | LGDMYDHESLVK  |               |
|    |                                                               |          | 54  | 72  | 2169.13 | 2168.12 | 2168.094 | 13  | 0 | NLGVHLLLGDMYD | Oxidation (M) |
|    |                                                               |          |     |     |         |         |          |     |   | HESLVK        |               |
|    |                                                               |          | 73  | 94  | 2368.21 | 2367.2  | 2367.32  | -49 | 1 | AIKQVDVVISVVG |               |
|    |                                                               |          |     |     |         |         |          |     |   | QMQLADQVK     |               |
|    |                                                               |          | 108 | 119 | 1434.67 | 1433.66 | 1433.617 | 31  | 0 | FFPSEFGMDVDK  | Oxidation (M) |
|    |                                                               |          | 108 | 127 | 2242.1  | 2241.09 | 2241.041 | 23  | 1 | FFPSEFGMDVDK  |               |
|    |                                                               |          |     |     |         |         |          |     |   | NNAVEPAK      |               |
|    |                                                               |          | 108 | 127 | 2258.08 | 2257.07 | 2257.036 | 14  | 1 | FFPSEFGMDVDK  | Oxidation (M) |
|    |                                                               |          |     |     |         |         |          |     |   | NNAVEPAK      |               |
|    |                                                               |          | 120 | 127 | 842.474 | 841.467 | 841.4294 | 44  | 0 | NNAVEPAK      |               |
|    |                                                               |          | 219 | 232 | 1727.95 | 1726.94 | 1726.857 | 48  | 0 | NTYSFNELIALWE |               |
|    |                                                               |          |     |     |         |         |          |     |   | K             |               |

|    |                                                               |          |     |         |         |          |          |     |            |                                              |               |
|----|---------------------------------------------------------------|----------|-----|---------|---------|----------|----------|-----|------------|----------------------------------------------|---------------|
|    |                                                               | 241      | 250 | 1205.69 | 1204.68 | 1204.634 | 41       | 0   | TYVPEDQLLK |                                              |               |
| 51 | phenylcoumaran<br>benzylic ether<br>reductase-like<br>protein | ABN12322 | 19  | 26      | 864.43  | 863.423  | 863.4752 | -61 | 0          | FIVEASAK                                     |               |
|    |                                                               |          | 19  | 36      | 2034.06 | 2033.05  | 2033.074 | -10 | 1          | FIVEASAKEGHPT<br>FVFVR                       |               |
|    |                                                               |          | 27  | 36      | 1188.61 | 1187.6   | 1187.609 | -5  | 0          | EGHPTFVFVR                                   |               |
|    |                                                               |          | 54  | 72      | 2153.07 | 2152.06  | 2152.099 | -17 | 0          | NLGVHLLLGDMYD<br>HESLVK                      |               |
|    |                                                               |          | 54  | 72      | 2169.07 | 2168.06  | 2168.094 | -14 | 0          | NLGVHLLLGDMYD<br>HESLVK                      | Oxidation (M) |
|    |                                                               |          | 76  | 94      | 2056.06 | 2055.05  | 2055.104 | -25 | 0          | QVDVVISVVGQM<br>QLADQVK                      |               |
|    |                                                               |          | 76  | 94      | 2072.07 | 2071.06  | 2071.098 | -17 | 0          | QVDVVISVVGQM<br>QLADQVK                      | Oxidation (M) |
|    |                                                               |          | 108 | 119     | 1434.65 | 1433.64  | 1433.617 | 18  | 0          | FFPSEFGMDVDK                                 | Oxidation (M) |
|    |                                                               |          | 108 | 127     | 2242.01 | 2241     | 2241.041 | -17 | 1          | FFPSEFGMDVDK<br>NNAVEPAK                     |               |
|    |                                                               |          | 120 | 127     | 842.44  | 841.433  | 841.4294 | 4   | 0          | NNAVEPAK<br>RAVEAEGIPYTYV                    |               |
|    |                                                               |          | 138 | 173     | 3897.91 | 3896.9   | 3896.92  | -4  | 1          | PANCFAGYFLPTL<br>SQPGATSPPR<br>AVEAEGIPYTYVP |               |
|    |                                                               |          | 139 | 173     | 3741.73 | 3740.72  | 3740.819 | -26 | 0          | ANCFAGYFLPTLS<br>QPGATSPPR                   |               |
|    |                                                               |          | 176 | 185     | 1011.55 | 1010.54  | 1010.576 | -33 | 0          | VVILGDGNPK                                   |               |
|    |                                                               |          | 186 | 200     | 1678.85 | 1677.84  | 1677.836 | 4   | 0          | AVFNHEADIGTYTI                               |               |





|    |                     |     |     |         |         |          |    |   |               |               |
|----|---------------------|-----|-----|---------|---------|----------|----|---|---------------|---------------|
|    |                     |     |     |         |         |          |    |   | VCHSLGGGTGSG  |               |
|    |                     |     |     |         |         |          |    |   | MGTLLISK      |               |
|    |                     |     |     |         |         |          |    |   | EAENCDCLQGfq  |               |
|    |                     | 123 | 154 | 3399.58 | 3398.58 | 3398.5   | 22 | 0 | VCHSLGGGTGSG  | Oxidation (M) |
|    |                     |     |     |         |         |          |    |   | MGTLLISK      |               |
|    |                     | 155 | 162 | 1077.53 | 1076.53 | 1076.525 | 1  | 1 | IREEYPDR      |               |
|    |                     | 163 | 174 | 1384.76 | 1383.75 | 1383.693 | 39 | 0 | MMLTFSVFPSPK  |               |
|    |                     | 163 | 174 | 1400.74 | 1399.74 | 1399.688 | 34 | 0 | MMLTFSVFPSPK  | Oxidation (M) |
|    |                     |     |     |         |         |          |    |   | TLKLTPSFGDLN  |               |
|    |                     | 214 | 241 | 3093.59 | 3092.58 | 3092.546 | 13 | 1 | HLISATMSGVTCC |               |
|    |                     |     |     |         |         |          |    |   | LR            |               |
|    |                     | 242 | 251 | 1146.62 | 1145.61 | 1145.583 | 23 | 0 | FPGQLNSDLR    |               |
|    |                     | 242 | 252 | 1274.73 | 1273.72 | 1273.678 | 32 | 1 | FPGQLNSDLRK   |               |
|    |                     | 252 | 262 | 1267.82 | 1266.81 | 1266.781 | 21 | 1 | KLAVNLIPFPR   |               |
|    |                     | 253 | 262 | 1139.73 | 1138.72 | 1138.686 | 30 | 0 | LAVNLIPFPR    |               |
|    |                     | 263 | 276 | 1622.89 | 1621.88 | 1621.844 | 23 | 0 | LHFFMVGfAPLTS |               |
|    |                     |     |     |         |         |          |    |   | R             |               |
|    |                     | 263 | 276 | 1638.89 | 1637.89 | 1637.839 | 29 | 0 | LHFFMVGfAPLTS | Oxidation (M) |
|    |                     |     |     |         |         |          |    |   | R             |               |
|    |                     | 283 | 297 | 1730.92 | 1729.92 | 1729.871 | 26 | 0 | ALTVPELTQQMW  |               |
|    |                     |     |     |         |         |          |    |   | DAK           |               |
|    |                     | 283 | 297 | 1746.91 | 1745.9  | 1745.866 | 19 | 0 | ALTVPELTQQMW  | Oxidation (M) |
|    |                     |     |     |         |         |          |    |   | DAK           |               |
|    |                     | 298 | 309 | 1431.66 | 1430.66 | 1430.597 | 41 | 1 | NMMCAADPRHGR  | Oxidation (M) |
| 46 | $\alpha$ -tubulin 4 |     |     |         |         |          |    |   | TVGGGDDAFNTF  |               |
|    |                     | 41  | 60  | 1977.93 | 1976.92 | 1976.875 | 21 | 0 | FSETGAGK      |               |
|    |                     | 41  | 64  | 2467.2  | 2466.19 | 2466.156 | 14 | 1 | TVGGGDDAFNTF  |               |
|    |                     |     |     |         |         |          |    |   | FSETGAGKHVPR  |               |

|     |     |         |         |          |    |   |                                           |               |
|-----|-----|---------|---------|----------|----|---|-------------------------------------------|---------------|
| 65  | 79  | 1701.96 | 1700.95 | 1700.899 | 33 | 0 | AVFVDLEPTVIDEVR                           |               |
| 85  | 96  | 1396.8  | 1395.79 | 1395.751 | 28 | 0 | QLFHPEQLISGK                              |               |
| 85  | 105 | 2385.22 | 2384.21 | 2384.187 | 9  | 1 | QLFHPEQLISGKE<br>DAANNFAR                 |               |
| 106 | 121 | 1889    | 1887.99 | 1887.951 | 22 | 1 | GHYTIGKEIVDLCLDR                          |               |
| 113 | 121 | 1132.59 | 1131.58 | 1131.559 | 17 | 0 | EIVDLCLDR                                 |               |
| 113 | 123 | 1401.79 | 1400.78 | 1400.745 | 27 | 1 | EIVDLCLDRIR<br>KLADNCTGLQGFL              |               |
| 124 | 156 | 3321.85 | 3320.84 | 3320.719 | 36 | 1 | VFNAVGGGTGSLG<br>LGSLLER<br>LADNCTGLQGFLV |               |
| 125 | 156 | 3193.73 | 3192.72 | 3192.624 | 32 | 0 | FNAVGGGTGSLG<br>GSLLER                    |               |
| 215 | 229 | 1848.01 | 1847    | 1846.965 | 18 | 1 | RSLDIERPTYTNLNR                           |               |
| 216 | 229 | 1691.92 | 1690.91 | 1690.864 | 27 | 0 | SLDIERPTYTNLNR                            |               |
| 230 | 243 | 1473.91 | 1472.9  | 1472.856 | 32 | 0 | LVSQVISSLTASLR                            |               |
| 244 | 264 | 2395.22 | 2394.21 | 2394.186 | 10 | 0 | FDGALNVDVTEFQ<br>TNLVYPYPR                |               |
| 265 | 280 | 1792.95 | 1791.95 | 1791.923 | 13 | 0 | IHFMLSSYAPVISA<br>EK                      |               |
| 265 | 280 | 1808.97 | 1807.96 | 1807.918 | 25 | 0 | IHFMLSSYAPVISA<br>EK                      | Oxidation (M) |
| 281 | 304 | 2641.26 | 2640.26 | 2640.22  | 14 | 0 | AYHEQLSVAEITN<br>SAFEPSSMMAK              |               |

|    |                     |          |     |     |         |         |          |    |   |                                                           |                 |
|----|---------------------|----------|-----|-----|---------|---------|----------|----|---|-----------------------------------------------------------|-----------------|
|    |                     |          | 281 | 304 | 2657.28 | 2656.27 | 2656.215 | 22 | 0 | AYHEQLSVAEITN<br>SAFEPSSMMAK                              | Oxidation (M)   |
|    |                     |          | 281 | 304 | 2673.35 | 2672.35 | 2672.21  | 51 | 0 | AYHEQLSVAEITN<br>SAFEPSSMMAK                              | 2 Oxidation (M) |
| 49 | $\alpha$ -tubulin 4 | AAN33000 | 65  | 79  | 1702.01 | 1701    | 1700.899 | 61 | 0 | AVFVDLEPTVIDEV<br>R                                       |                 |
|    |                     |          | 85  | 96  | 1396.84 | 1395.83 | 1395.751 | 59 | 0 | QLFHPEQLISGK                                              |                 |
|    |                     |          | 85  | 105 | 2385.33 | 2384.32 | 2384.187 | 57 | 1 | QLFHPEQLISGKE<br>DAANNFAR                                 |                 |
|    |                     |          | 106 | 121 | 1889.06 | 1888.05 | 1887.951 | 54 | 1 | GHYTIGKEIVDLCL<br>DR                                      |                 |
|    |                     |          | 113 | 121 | 1132.62 | 1131.61 | 1131.559 | 47 | 0 | EIVDLCLDR                                                 |                 |
|    |                     |          | 124 | 156 | 3321.9  | 3320.89 | 3320.719 | 52 | 1 | KLADNCTGLQGFL<br>VFNAVGGGTGSG<br>LGSLLER<br>LADNCTGLQGFLV |                 |
|    |                     |          | 125 | 156 | 3193.87 | 3192.86 | 3192.624 | 75 | 0 | FNAVGGGTGSL<br>GSLLER                                     |                 |
|    |                     |          | 215 | 229 | 1848.07 | 1847.06 | 1846.965 | 53 | 1 | RSLDIERPTYTNL<br>NR                                       |                 |
|    |                     |          | 216 | 229 | 1691.96 | 1690.95 | 1690.864 | 53 | 0 | SLDIERPTYTNLN<br>R                                        |                 |
|    |                     |          | 244 | 264 | 2395.33 | 2394.32 | 2394.186 | 57 | 0 | FDGALNVDVTEFQ<br>TNLVPYPR                                 |                 |
|    |                     |          | 265 | 280 | 1793.03 | 1792.02 | 1791.923 | 56 | 0 | IHFMLSSYAPVISA<br>EK                                      |                 |
|    |                     |          | 265 | 280 | 1809.04 | 1808.03 | 1807.918 | 64 | 0 | IHFMLSSYAPVISA<br>EK                                      | Oxidation (M)   |

|    |                   |          |     |     |         |         |          |    |   |                                           |               |
|----|-------------------|----------|-----|-----|---------|---------|----------|----|---|-------------------------------------------|---------------|
| 48 | $\alpha$ -tubulin | ABO47738 | 65  | 79  | 1701.98 | 1700.97 | 1700.899 | 41 | 0 | AVFVDLEPTVIDEVR                           |               |
|    |                   |          | 85  | 96  | 1396.81 | 1395.8  | 1395.751 | 38 | 0 | QLFHPEQLISGK                              |               |
|    |                   |          | 85  | 105 | 2385.26 | 2384.25 | 2384.187 | 28 | 1 | QLFHPEQLISGKE<br>DAANNFAR                 |               |
|    |                   |          | 106 | 121 | 1889    | 1888    | 1887.951 | 24 | 1 | GHYTIGKEIVDLCLDR                          |               |
|    |                   |          | 113 | 121 | 1132.62 | 1131.61 | 1131.559 | 44 | 0 | EIVDLCLDR<br>KLADNCTGLQGF                 |               |
|    |                   |          | 124 | 156 | 3339.83 | 3338.83 | 3338.675 | 45 | 1 | MVFNAVGGGTGS<br>GLGSLLLER<br>KLADNCTGLQGF |               |
|    |                   |          | 124 | 156 | 3355.79 | 3354.78 | 3354.67  | 34 | 1 | MVFNAVGGGTGS<br>GLGSLLLER<br>LADNCTGLQGF  | Oxidation (M) |
|    |                   |          | 125 | 156 | 3211.69 | 3210.68 | 3210.58  | 31 | 0 | VFNAVGGGTGSG<br>LGSLLLER<br>LADNCTGLQGF   |               |
|    |                   |          | 125 | 156 | 3227.7  | 3226.7  | 3226.575 | 37 | 0 | VFNAVGGGTGSG<br>LGSLLLER                  | Oxidation (M) |
|    |                   |          | 215 | 229 | 1848.02 | 1847.01 | 1846.965 | 24 | 1 | RSLDIERPTYTNLNR                           |               |
|    |                   |          | 216 | 229 | 1691.93 | 1690.92 | 1690.864 | 35 | 0 | SLDIERPTYTNLNR                            |               |
|    |                   |          | 230 | 243 | 1519.9  | 1518.9  | 1518.862 | 22 | 0 | LISQTISSLTTSR                             |               |
|    |                   |          | 244 | 264 | 2409.25 | 2408.25 | 2408.201 | 19 | 0 | FDGAINVDITEFQTNLVPYPR                     |               |
|    |                   |          | 265 | 280 | 1792.99 | 1791.98 | 1791.923 | 31 | 0 | IHFMLSSYAPVISA                            |               |

|    |                                                    |          |     |     |         |         |          |    |   |                               |                 |
|----|----------------------------------------------------|----------|-----|-----|---------|---------|----------|----|---|-------------------------------|-----------------|
|    |                                                    |          | 265 | 280 | 1809    | 1807.99 | 1807.918 | 39 | 0 | EK<br>IHFMLSSYAPVISA<br>EK    | Oxidation (M)   |
|    |                                                    |          | 281 | 304 | 2679.35 | 2678.34 | 2678.272 | 26 | 0 | AYHEQISVPEITNA<br>VFEPSSMMAK  |                 |
|    |                                                    |          | 281 | 304 | 2695.34 | 2694.33 | 2694.267 | 24 | 0 | AYHEQISVPEITNA<br>VFEPSSMMAK  | Oxidation (M)   |
|    |                                                    |          | 281 | 304 | 2711.34 | 2710.33 | 2710.262 | 26 | 0 | AYHEQISVPEITNA<br>VFEPSSMMAK  | 2 Oxidation (M) |
|    |                                                    |          | 353 | 373 | 2239.19 | 2238.18 | 2238.158 | 11 | 1 | CGINYQPPAVVPG<br>GDLAKVQR     |                 |
| 50 | glyceraldehyde-3-phosphate dehydrogenase C subunit | FJ415206 | 49  | 57  | 1119.56 | 1118.55 | 1118.51  | 35 | 0 | YDSVHGQWK                     |                 |
|    |                                                    |          | 83  | 107 | 2738.37 | 2737.36 | 2737.28  | 29 | 0 | NPEEIPWAEAGAE<br>YVVESTGVFTDK |                 |
|    |                                                    |          | 129 | 140 | 1305.7  | 1304.69 | 1304.64  | 30 | 0 | DAPMFVVGVNEK                  |                 |
|    |                                                    |          | 170 | 188 | 2033.14 | 2032.13 | 2032.07  | 34 | 0 | FGIVEGLMTTVHSI<br>TATQK       |                 |
|    |                                                    |          | 237 | 250 | 1498.91 | 1497.91 | 1497.84  | 46 | 0 | VPTVDVSVDLTV<br>R             |                 |
|    |                                                    |          | 274 | 293 | 2198.12 | 2197.11 | 2197.05  | 27 | 0 | GILGYVDEDLVST<br>DFIGDNR      |                 |
|    |                                                    |          | 312 | 325 | 1775.86 | 1774.85 | 1774.8   | 33 | 0 | LVTWYDNEWGYS<br>SR            |                 |
| 54 | 2-nitropropane dioxygenase                         | FJ415176 | 60  | 77  | 1994.16 | 1993.15 | 1993.1   | 25 | 0 | ELTDKPFVGVVLL<br>PFPHK        |                 |

|     |     |         |         |         |    |   |                                                |
|-----|-----|---------|---------|---------|----|---|------------------------------------------------|
| 60  | 81  | 2478.44 | 2477.44 | 2477.37 | 28 | 1 | ELTDKPFVGVLL<br>PFPKNIK                        |
| 88  | 100 | 1446.81 | 1445.8  | 1445.73 | 48 | 0 | VAVLQVAWGECS<br>K                              |
| 101 | 125 | 2647.45 | 2646.44 | 2646.4  | 15 | 1 | ELVLEAHNAGVMV<br>VPQVGSLEEAKK<br>KVIDAGVDIIVQG |
| 125 | 157 | 3347.98 | 3346.98 | 3346.84 | 41 | 1 | HEAGGHVLGQDG<br>LISLLPR<br>VIDAGVDIIVQGH       |
| 126 | 157 | 3219.9  | 3218.9  | 3218.74 | 46 | 0 | EAGGHVLGQDGLI<br>SLLPR<br>VDAVADHDIPVIA        |
| 158 | 179 | 2173.22 | 2172.21 | 2172.15 | 27 | 0 | AGGIVDAR                                       |
| 180 | 190 | 1033.62 | 1032.62 | 1032.6  | 19 | 0 | GYVAALALGAK                                    |
| 203 | 211 | 1095.55 | 1094.54 | 1094.5  | 36 | 0 | ESYAHPTYK                                      |
| 212 | 228 | 2094.07 | 2093.06 | 2093.01 | 28 | 1 | QKLIHDETEYTDI<br>FGR                           |
| 214 | 228 | 1837.92 | 1836.91 | 1836.85 | 32 | 0 | LIEHDETEYTDIFG<br>R                            |
| 229 | 237 | 995.58  | 994.57  | 994.53  | 30 | 0 | ALWPGAPQR                                      |
| 241 | 248 | 1052.53 | 1051.52 | 1051.48 | 38 | 0 | TPFVCDWK                                       |
| 265 | 276 | 1413.78 | 1412.77 | 1412.71 | 42 | 0 | SLIHGMETEIQR<br>FSASDPNPTTTGE                  |
| 277 | 305 | 3011.55 | 3010.55 | 3010.46 | 29 | 0 | IENMALYAGQSVG<br>LIK                           |
| 306 | 316 | 1210.77 | 1209.76 | 1209.71 | 41 | 1 | EILPAGEVVKR                                    |
| 316 | 326 | 1291.81 | 1290.8  | 1290.75 | 38 | 1 | RLVEGAQHLIR                                    |

|    |                           |          |     |     |         |         |         |    |   |                                                 |
|----|---------------------------|----------|-----|-----|---------|---------|---------|----|---|-------------------------------------------------|
|    |                           |          | 317 | 326 | 1135.69 | 1134.68 | 1134.65 | 26 | 0 | LVEGAQHILIR                                     |
| 55 | quinone<br>oxidoreductase | FJ415175 | 14  | 22  | 1114.56 | 1113.56 | 1113.51 | 35 | 0 | AWTYPEYGK                                       |
|    |                           |          | 29  | 39  | 1237.77 | 1236.76 | 1236.68 | 64 | 0 | LQSDVVVPQPR                                     |
|    |                           |          | 40  | 58  | 2055.18 | 2054.18 | 2054.1  | 34 | 0 | DDQVLLQVVAAGI<br>NPIDFK                         |
|    |                           |          | 40  | 59  | 2211.27 | 2210.26 | 2210.21 | 27 | 1 | DDQVLLQVVAAGI<br>NPIDFKR                        |
|    |                           |          | 66  | 85  | 2066.21 | 2065.2  | 2065.15 | 24 | 0 | NIDSPLPIIPGYDV<br>AGVVVK                        |
|    |                           |          | 93  | 106 | 1641.85 | 1640.85 | 1640.77 | 48 | 1 | FKEGDQVYGDINE<br>K                              |
|    |                           |          | 95  | 106 | 1366.74 | 1365.73 | 1365.6  | 87 | 0 | EGDQVYGDINEK                                    |
|    |                           |          | 107 | 126 | 2160.17 | 2159.16 | 2159.09 | 32 | 0 | AVDHPTQFGTIAE<br>FTVVAEK                        |
|    |                           |          | 107 | 133 | 2923.71 | 2922.7  | 2922.62 | 27 | 1 | AVDHPTQFGTIAE<br>FTVVAEKLLALKP<br>K             |
|    |                           |          | 134 | 156 | 2521.39 | 2520.38 | 2520.31 | 27 | 0 | NLSFVEAASLPLVI<br>ETAYEGLER                     |
|    |                           |          | 157 | 163 | 806.37  | 805.36  | 805.35  | 12 | 0 | CHFSAGK                                         |
|    |                           |          | 164 | 183 | 1898.16 | 1897.15 | 1897.11 | 21 | 0 | SILVLGGAGGVGT<br>MIIQLAK                        |
|    |                           |          | 200 | 225 | 2961.57 | 2960.56 | 2960.5  | 20 | 1 | LDLLKSLGADLPID<br>YTNQNFEDLPEK<br>SLGADLPIDYTNQ |
|    |                           |          | 205 | 238 | 3918.1  | 3917.09 | 3916.81 | 71 | 1 | NFEDLPEKFDVVY<br>DAVGQCER                       |

|    |                             |          |     |     |         |         |          |    |   |                                 |               |
|----|-----------------------------|----------|-----|-----|---------|---------|----------|----|---|---------------------------------|---------------|
|    |                             |          | 226 | 238 | 1557.78 | 1556.77 | 1556.69  | 44 | 0 | FDVVYDAVGQCE<br>R               |               |
|    |                             |          | 284 | 310 | 3025.61 | 3024.6  | 3024.51  | 33 | 0 | VKPMIDPNGIFPFS<br>ETPQAFAYLETGR |               |
| 57 | gibberellin<br>20-oxidase 1 | ABA01482 | 14  | 28  | 1790.96 | 1789.95 | 1789.896 | 32 | 1 | TLQASFVRDEDER<br>PK             |               |
|    |                             |          | 29  | 52  | 2550.31 | 2549.3  | 2549.265 | 15 | 0 | VAYNQFSNDIPVIS<br>LAGIDDVDGK    |               |
|    |                             |          | 59  | 80  | 2531.25 | 2530.24 | 2530.216 | 9  | 1 | KIVEACEDWGVFQ<br>VVDHGVDTK      |               |
|    |                             |          | 60  | 80  | 2403.17 | 2402.16 | 2402.121 | 16 | 0 | IVEACEDWGVFQV<br>VDHGVDTK       |               |
|    |                             |          | 91  | 100 | 1180.63 | 1179.63 | 1179.581 | 39 | 0 | EFFALPAEEK                      |               |
|    |                             |          | 91  | 102 | 1449.84 | 1448.83 | 1448.766 | 42 | 1 | EFFALPAEEKLR                    |               |
|    |                             |          | 111 | 128 | 1986.01 | 1985    | 1984.976 | 13 | 0 | GGFIVSSHLQGEA<br>VQDWR          |               |
|    |                             |          | 129 | 139 | 1387.78 | 1386.77 | 1386.718 | 38 | 0 | EIVTYFSYPLR                     |               |
|    |                             |          | 142 | 158 | 2092.05 | 2091.04 | 2091.006 | 18 | 1 | DYSRWPKPEGW<br>VEVTK            |               |
|    |                             |          | 146 | 158 | 1570.84 | 1569.83 | 1569.783 | 31 | 0 | WPKPEGWVEVT<br>K                |               |
|    |                             |          | 146 | 163 | 2207.1  | 2206.09 | 2206.058 | 17 | 1 | WPKPEGWVEVT<br>KEYSEK           |               |
|    |                             |          | 164 | 183 | 2221.15 | 2220.15 | 2220.157 | -5 | 1 | LMGLACKLLEVL<br>EAMGLEK         | Oxidation (M) |
|    |                             |          | 171 | 183 | 1431.8  | 1430.79 | 1430.769 | 16 | 0 | LLEVELSEAMGLEK                  |               |
|    |                             |          | 171 | 183 | 1447.84 | 1446.83 | 1446.764 | 44 | 0 | LLEVELSEAMGLEK                  | Oxidation (M) |
|    |                             |          | 171 | 188 | 1990.11 | 1989.11 | 1989.07  | 18 | 1 | LLEVELSEAMGLEK                  | Oxidation (M) |



|    |                         |          |     |         |         |          |          |     |               |               |               |
|----|-------------------------|----------|-----|---------|---------|----------|----------|-----|---------------|---------------|---------------|
|    |                         |          |     |         |         |          |          |     | EALTK         |               |               |
|    |                         | 197      | 204 | 965.563 | 964.556 | 964.5382 | 18       | 0   | VVVFYYPK      |               |               |
|    |                         | 205      | 215 | 1241.71 | 1240.71 | 1240.649 | 46       | 0   | CPQPDLTLGLK   |               |               |
|    |                         | 205      | 216 | 1397.81 | 1396.8  | 1396.75  | 37       | 1   | CPQPDLTLGLKR  |               |               |
|    |                         | 216      | 238 | 2490.38 | 2489.37 | 2489.335 | 15       | 1   | RHTDPGTITLLLQ |               |               |
|    |                         |          |     |         |         |          |          |     | DQVGGLQATR    |               |               |
|    |                         | 217      | 238 | 2334.28 | 2333.28 | 2333.234 | 18       | 0   | HTDPGTITLLLQD |               |               |
|    |                         |          |     |         |         |          |          |     | QVGGLQATR     |               |               |
|    |                         | 270      | 285 | 1847.89 | 1846.88 | 1846.838 | 23       | 1   | FKNADHQAVVNS  |               |               |
|    |                         |          |     |         |         |          |          |     | DCSR          |               |               |
|    |                         |          |     |         |         |          |          |     | NADHQAVVNSDC  |               |               |
|    |                         | 272      | 304 | 3599.89 | 3598.89 | 3598.747 | 38       | 1   | SRLSIATFQNPAP |               |               |
|    |                         |          |     |         |         |          |          |     | DATVYPLK      |               |               |
|    |                         | 286      | 304 | 2046.12 | 2045.11 | 2045.083 | 13       | 0   | LSIATFQNPAPDA |               |               |
|    |                         |          |     |         |         |          |          |     | TVYPLK        |               |               |
|    |                         | 358      | 368 | 1225.72 | 1224.71 | 1224.697 | 10       | 0   | LEAKPLEEILA   |               |               |
| 58 | flavanone-3-hydroxylase | ABM64799 | 2   | 13      | 1230.68 | 1229.67  | 1229.65  | 18  | 0             | APSTLTALAEK   |               |
|    |                         |          | 14  | 21      | 921.5   | 920.493  | 920.508  | -17 | 0             | TLQASFVR      |               |
|    |                         |          | 14  | 28      | 1790.9  | 1789.89  | 1789.896 | -2  | 1             | TLQASFVRDEDER |               |
|    |                         |          |     |         |         |          |          |     | PK            |               |               |
|    |                         |          | 60  | 80      | 2403.13 | 2402.12  | 2402.121 | 1   | 0             | IVEACEDWGVFQV |               |
|    |                         |          |     |         |         |          |          |     | VDHGVDTK      |               |               |
|    |                         |          | 81  | 87      | 835.41  | 834.403  | 834.4269 | -29 | 0             | LVSEMTR       |               |
|    |                         |          | 81  | 87      | 851.4   | 850.393  | 850.4218 | -34 | 0             | LVSEMTR       | Oxidation (M) |
|    |                         |          | 91  | 100     | 1180.59 | 1179.58  | 1179.581 | 1   | 0             | EFFALPAEEK    |               |
|    |                         |          | 101 | 109     | 1026.5  | 1025.49  | 1025.496 | -4  | 1             | LRFDMMSGGK    | Oxidation (M) |
|    |                         |          | 111 | 128     | 1985.95 | 1984.94  | 1984.976 | -17 | 0             | GGFIVSSHLQGEA |               |

|     |     |         |         |          |     |   |                                           | VQDWR |               |  |
|-----|-----|---------|---------|----------|-----|---|-------------------------------------------|-------|---------------|--|
| 129 | 139 | 1359.74 | 1358.73 | 1358.712 | 15  | 0 | EIVTYFSYPLK                               |       |               |  |
| 129 | 141 | 1602.86 | 1601.85 | 1601.845 | 5   | 1 | EIVTYFSYPLKSR                             |       |               |  |
| 142 | 158 | 2106.01 | 2105    | 2105.022 | -9  | 1 | DYSRWPDKPEGW<br>IEVTK                     |       |               |  |
| 146 | 158 | 1584.83 | 1583.82 | 1583.798 | 15  | 0 | WPDKPEGWIEVT<br>K                         |       |               |  |
| 164 | 170 | 808.37  | 807.363 | 807.3983 | -44 | 0 | LMGLACK                                   |       | Oxidation (M) |  |
| 171 | 183 | 1431.79 | 1430.78 | 1430.769 | 10  | 0 | LLEVELSEAMGLEK                            |       |               |  |
| 197 | 204 | 965.54  | 964.533 | 964.5382 | -6  | 0 | VVVNFYPK                                  |       |               |  |
| 205 | 215 | 1241.67 | 1240.66 | 1240.649 | 11  | 0 | CPQPDLTLGLK                               |       |               |  |
| 205 | 216 | 1397.77 | 1396.76 | 1396.75  | 9   | 1 | CPQPDLTLGLKR                              |       |               |  |
| 216 | 238 | 2490.34 | 2489.33 | 2489.335 | -1  | 1 | RHTDPGTITLLLQ<br>DQVGGLQATR               |       |               |  |
| 217 | 238 | 2334.22 | 2333.21 | 2333.234 | -9  | 0 | HTDPGTITLLLQD<br>QVGGLQATR                |       |               |  |
| 272 | 285 | 1571.78 | 1570.77 | 1570.691 | 52  | 0 | NADHQAVVNSNC<br>SR                        |       |               |  |
| 272 | 304 | 3599.02 | 3598.01 | 3597.763 | 69  | 1 | NADHQAVVNSNC<br>SRLSIATFQNPAP<br>DATVYPLK |       |               |  |
| 286 | 304 | 2046.09 | 2045.08 | 2045.083 | 0   | 0 | LSIATFQNPAPDA<br>TVYPLK                   |       |               |  |
| 307 | 324 | 2152.07 | 2151.06 | 2151.056 | 3   | 0 | EGEKPILEEPITFA<br>EMYR                    |       |               |  |
| 307 | 324 | 2168.06 | 2167.05 | 2167.051 | 1   | 0 | EGEKPILEEPITFA<br>EMYR                    |       | Oxidation (M) |  |
| 358 | 368 | 1225.7  | 1224.69 | 1224.697 | -3  | 0 | LEAKPLEEILA                               |       |               |  |

|     |                           |          |         |         |         |         |             |    |   |                               |               |
|-----|---------------------------|----------|---------|---------|---------|---------|-------------|----|---|-------------------------------|---------------|
| 59  | mannitol<br>dehydrogenase | FJ415191 | 13      | 32      | 2158.06 | 2157.05 | 2157.03     | 9  | 0 | AFGWAATDNSGIL<br>SPFNFSR      |               |
|     |                           |          | 44      | 58      | 1843.92 | 1842.91 | 1842.89     | 10 | 0 | ILYCGVCHSDLHT<br>LR           |               |
|     |                           |          | 59      | 80      | 2435.25 | 2434.24 | 2434.2      | 16 | 0 | NDWGFSFYVVP<br>GHEISGVVTK     |               |
|     |                           |          | 94      | 104     | 1074.62 | 1073.61 | 1073.59     | 18 | 0 | VGVGVLVGSK                    |               |
|     |                           |          | 105     | 119     | 2033.76 | 2032.76 | 2032.74     | 9  | 0 | TCECCEQDLENY<br>CPR           |               |
|     |                           |          | 120     | 133     | 1632.8  | 1631.8  | 1631.78     | 6  | 0 | IIFTYNSYNDGK<br>NYGGYSMDIVVD  |               |
|     |                           |          | 134     | 147     | 1616.77 | 1615.76 | 1615.73     | 18 | 0 | QR                            |               |
|     |                           |          | 152     | 176     | 2676.42 | 2675.41 | 2675.33     | 29 | 0 | FPDNLPLDAGAPL<br>LCAGITVYSPMK | Oxidation (M) |
|     |                           |          | 186     | 201     | 1500.9  | 1499.89 | 1499.86     | 20 | 0 | HLGVSGLGGLGH<br>VAVK          |               |
|     |                           |          | 227     | 240     | 1491.77 | 1490.76 | 1490.73     | 20 | 0 | LGADSFLVSNDPE<br>K            |               |
|     |                           |          | 274     | 295     | 2389.42 | 2388.42 | 2388.4      | 8  | 0 | LTVGLPNKPLEL<br>PVFPLVMGR     |               |
|     |                           |          | 274     | 295     | 2405.44 | 2404.43 | 2404.39     | 16 | 0 | LTVGLPNKPLEL<br>PVFPLVMGR     | Oxidation (M) |
|     |                           |          | 308     | 318     | 1371.62 | 1370.61 | 1370.58     | 21 | 0 | ETQEMLDCAK                    |               |
|     |                           |          | 308     | 318     | 1387.62 | 1386.61 | 1386.58     | 21 | 0 | ETQEMLDCAK                    | Oxidation (M) |
|     |                           |          | 319     | 329     | 1294.74 | 1293.73 | 1293.7      | 23 | 0 | HNITADIELIR                   |               |
| 349 | 359                       | 1192.64  | 1191.64 | 1191.61 | 16      | 0       | FVIDVANSLSQ |    |   |                               |               |
| 60  | adenosine kinase          | FJ415170 | 43      | 69      | 2977.49 | 2976.48 | 2976.45     | 13 | 0 | HLPYQEMASKP<br>NVEYIAGGATQNS  |               |

|    |                  |          |     |     |         |         |         |    |    |               |
|----|------------------|----------|-----|-----|---------|---------|---------|----|----|---------------|
|    |                  |          |     |     |         |         |         |    | IK |               |
|    |                  |          | 70  | 89  | 2163.16 | 2162.15 | 2162.1  | 23 | 0  | VAQWMLQIPGAT  |
|    |                  |          |     |     |         |         |         |    |    | GYIGCIGK      |
|    |                  |          |     |     |         |         |         |    |    | AAGVNVQYLEDET |
|    |                  |          | 102 | 129 | 2923.4  | 2922.39 | 2922.35 | 13 | 0  | APTGTCAVCVVG  |
|    |                  |          |     |     |         |         |         |    |    | GER           |
|    |                  |          | 130 | 142 | 1424.77 | 1423.76 | 1423.71 | 35 | 0  | SLIANLSAANCYK |
|    |                  |          | 186 | 203 | 2179.12 | 2178.11 | 2178.06 | 22 | 1  | NKVFSMNLSPFI  |
|    |                  |          |     |     |         |         |         |    |    | CEFFK         |
|    |                  |          | 188 | 203 | 1936.97 | 1935.96 | 1935.93 | 20 | 0  | VFSMNLSPFICE  |
|    |                  |          |     |     |         |         |         |    |    | FFK           |
|    |                  |          | 188 | 208 | 2508.2  | 2507.19 | 2507.19 | 3  | 1  | VFSMNLSPFICE  |
|    |                  |          |     |     |         |         |         |    |    | FFKDAQEK      |
|    |                  |          | 209 | 224 | 1859.92 | 1858.91 | 1858.86 | 32 | 0  | ALPYMDFVFGNET |
|    |                  |          |     |     |         |         |         |    |    | EAR           |
|    |                  |          | 229 | 243 | 1682.89 | 1681.88 | 1681.83 | 29 | 0  | VHWETDDVAEIA  |
|    |                  |          |     |     |         |         |         |    |    | LK            |
|    |                  |          | 275 | 285 | 1281.87 | 1280.86 | 1280.82 | 31 | 1  | VKQFPVILLPK   |
|    |                  |          | 277 | 285 | 1054.69 | 1053.68 | 1053.66 | 18 | 0  | QFPVILLPK     |
|    |                  |          | 286 | 310 | 2550.32 | 2549.31 | 2549.31 | 0  | 1  | EKLVDNAGDAF   |
|    |                  |          |     |     |         |         |         |    |    | VGGFLSQLVQGK  |
|    |                  |          | 288 | 310 | 2293.19 | 2292.18 | 2292.17 | 4  | 0  | LVDTNAGDAFV   |
|    |                  |          |     |     |         |         |         |    |    | GGFLSQLVQGK   |
|    |                  |          | 318 | 329 | 1351.73 | 1350.72 | 1350.67 | 37 | 0  | AGCYASNVIQR   |
|    |                  |          | 330 | 341 | 1442.69 | 1441.68 | 1441.65 | 20 | 0  | SGCTYPEKPEFK  |
|    |                  |          |     |     |         |         |         |    |    | HLPYQEMASKP   |
| 61 | adenosine kinase | FJ415170 | 43  | 69  | 2977.46 | 2976.45 | 2976.45 | 0  | 0  | NVEYIAGGATQNS |
|    |                  |          |     |     |         |         |         |    |    | IK            |

|     |     |         |         |         |    |   |   |                |                 |
|-----|-----|---------|---------|---------|----|---|---|----------------|-----------------|
|     |     |         |         |         |    |   |   | HLPMYQEMASKP   |                 |
| 43  | 69  | 2993.46 | 2992.45 | 2992.44 | 3  | 0 | 0 | NVEYIAGGATQNS  | Oxidation (M)   |
|     |     |         |         |         |    |   |   | IK             |                 |
|     |     |         |         |         |    |   |   | HLPMYQEMASKP   |                 |
| 43  | 69  | 3009.44 | 3008.44 | 3008.44 | 0  | 0 | 0 | NVEYIAGGATQNS  | 2 Oxidation (M) |
|     |     |         |         |         |    |   |   | IK             |                 |
|     |     |         |         |         |    |   |   | VAQWMLQIPGAT   |                 |
| 70  | 89  | 2163.11 | 2162.11 | 2162.1  | 0  | 0 | 0 | GYIGCIGK       |                 |
|     |     |         |         |         |    |   |   | VAQWMLQIPGAT   |                 |
| 70  | 89  | 2179.12 | 2178.11 | 2178.1  | 4  | 0 | 0 | GYIGCIGK       | Oxidation (M)   |
|     |     |         |         |         |    |   |   | AAGVNVQYLEDET  |                 |
| 102 | 129 | 2923.36 | 2922.36 | 2922.35 | 3  | 0 | 0 | APTGTCAVCVVG   |                 |
|     |     |         |         |         |    |   |   | GER            |                 |
| 130 | 142 | 1424.74 | 1423.73 | 1423.71 | 14 | 0 | 0 | SLIANLSAANCYK  |                 |
| 148 | 157 | 1213.66 | 1212.66 | 1212.65 | 0  | 0 | 0 | KPENWALVEK     |                 |
|     |     |         |         |         |    |   |   | ALPYMDFVFGNET  |                 |
| 209 | 224 | 1859.88 | 1858.87 | 1858.86 | 5  | 0 | 0 | EAR            |                 |
|     |     |         |         |         |    |   |   | ALPYMDFVFGNET  |                 |
| 209 | 224 | 1875.88 | 1874.87 | 1874.85 | 10 | 0 | 0 | EAR            | Oxidation (M)   |
|     |     |         |         |         |    |   |   | VHGWETDDVAEIA  |                 |
| 229 | 243 | 1682.86 | 1681.85 | 1681.83 | 11 | 0 | 0 | LK             |                 |
|     |     |         |         |         |    |   |   | TTVITQGADPVIVA |                 |
| 257 | 274 | 1813.96 | 1812.96 | 1812.95 | 5  | 0 | 0 | EDGK           |                 |
|     |     |         |         |         |    |   |   | TTVITQGADPVIVA |                 |
| 257 | 276 | 2041.12 | 2040.11 | 2040.11 | 0  | 1 | 1 | EDGKVK         |                 |
|     |     |         |         |         |    |   |   | VKQFPVILLPK    |                 |
| 275 | 285 | 1281.83 | 1280.82 | 1280.82 | 0  | 1 | 1 | QFPVILLPK      |                 |
| 277 | 285 | 1054.68 | 1053.67 | 1053.66 | 9  | 0 | 0 | QFPVILLPK      |                 |
| 311 | 329 | 2211.1  | 2210.09 | 2210.06 | 18 | 1 | 1 | SIEDCVRAGCYAS  |                 |

|    |                                |          |     |     |         |         |         |    |   |                                         |
|----|--------------------------------|----------|-----|-----|---------|---------|---------|----|---|-----------------------------------------|
|    |                                |          |     |     |         |         |         |    |   | NVIIQR                                  |
|    |                                |          | 318 | 329 | 1351.7  | 1350.7  | 1350.67 | 14 | 0 | AGCYASNVIQR                             |
|    |                                |          | 330 | 341 | 1442.69 | 1441.68 | 1441.65 | 20 | 0 | SGCTYPEKPEFK                            |
| 62 | phosphoglycerate dehydrogenase | FJ415190 | 270 | 278 | 1068.53 | 1067.52 | 1067.5  | 28 | 0 | MLNDETFAK                               |
|    |                                |          | 291 | 301 | 1157.66 | 1156.66 | 1156.61 | 43 | 0 | GGVIDEEALVR<br>VTVTPHLGASTME            |
|    |                                |          | 333 | 363 | 3091.71 | 3090.7  | 3090.63 | 25 | 0 | AQEGVAIEIAEAVV<br>GALK<br>GELAATAVNAPMV |
|    |                                |          | 364 | 393 | 3153.75 | 3152.74 | 3152.67 | 22 | 0 | PAEVLTELKPYVE<br>LAEK                   |
|    |                                |          | 491 | 502 | 1256.64 | 1255.63 | 1255.58 | 47 | 0 | FASAMSESGEIK                            |
|    |                                |          | 517 | 534 | 1980.1  | 1979.09 | 1979    | 45 | 0 | VGSFEVDVSLEGS<br>IILCR<br>QVDQPGMIGTVG  |
|    |                                |          | 535 | 563 | 3020.55 | 3019.54 | 3019.47 | 23 | 0 | SILGEENVNVSFM<br>SVGR                   |
| 65 | phosphoglycerate dehydrogenase | FJ415190 | 270 | 278 | 1068.57 | 1067.56 | 1067.5  | 65 | 0 | MLNDETFAK                               |
|    |                                |          | 291 | 301 | 1157.68 | 1156.68 | 1156.61 | 60 | 0 | GGVIDEEALVR<br>VTVTPHLGASTME            |
|    |                                |          | 333 | 363 | 3091.78 | 3090.77 | 3090.63 | 48 | 0 | AQEGVAIEIAEAVV<br>GALK<br>GELAATAVNAPMV |
|    |                                |          | 364 | 393 | 3153.84 | 3152.83 | 3152.67 | 53 | 0 | PAEVLTELKPYVE<br>LAEK                   |
|    |                                |          | 467 | 490 | 2566.48 | 2565.47 | 2565.35 | 46 | 0 | ILLDGSPESPLESI                          |

|    |                                               |          |     |     |         |         |          |     |   |   |                                    |
|----|-----------------------------------------------|----------|-----|-----|---------|---------|----------|-----|---|---|------------------------------------|
|    |                                               |          |     |     |         |         |          |     |   |   | QVQIANVESK                         |
|    |                                               |          | 491 | 502 | 1256.66 | 1255.65 | 1255.58  | 63  | 0 | 0 | FASAMSESGEIK                       |
|    |                                               |          | 517 | 534 | 1980.12 | 1979.12 | 1979     | 55  | 0 | 0 | VGSFEVDVSLEGS                      |
|    |                                               |          |     |     |         |         |          |     |   |   | IILCR                              |
|    |                                               |          | 535 | 563 | 3020.63 | 3019.62 | 3019.47  | 49  | 0 | 0 | QVDQPGMIGTVG                       |
|    |                                               |          |     |     |         |         |          |     |   |   | SILGEENVNVFSM                      |
|    |                                               |          |     |     |         |         |          |     |   |   | SVGR                               |
| 64 | pyruvate<br>dehydrogenase $\alpha$<br>subunit | FJ415197 | 63  | 69  | 925.53  | 924.52  | 924.51   | 10  | 0 | 0 | ELLTFFR                            |
|    |                                               |          | 92  | 113 | 2367.06 | 2366.05 | 2366.1   | -21 | 0 | 0 | GFCHLYDGQEAV<br>AVGMEAAITK         |
|    |                                               |          | 115 | 122 | 1011.5  | 1010.49 | 1010.49  | 0   | 0 | 0 | DCIITAYR                           |
|    |                                               |          | 123 | 130 | 1021.46 | 1020.45 | 1020.44  | 9   | 0 | 0 | DHCTFVSR                           |
|    |                                               |          | 131 | 144 | 1492.76 | 1491.76 | 1491.78  | -13 | 0 | 0 | GGTLLEVFAELMG<br>R                 |
|    |                                               |          | 162 | 187 | 2663.21 | 2662.2  | 2662.3   | -33 | 0 | 0 | DSNFYGGHGIVGA<br>QVPLGCGLAFAQ<br>K |
|    |                                               |          | 281 | 292 | 1421.7  | 1420.69 | 1420.7   | -7  | 0 | 0 | NGPIILEMDTYR                       |
|    |                                               |          | 293 | 306 | 1594.65 | 1593.64 | 1593.66  | -12 | 0 | 0 | YHGHSMSDPGST<br>YR                 |
|    |                                               |          | 376 | 386 | 1107.54 | 1106.54 | 1106.54  | 0   | 0 | 0 | GLGVESFGADR                        |
| 66 | anthocyanidin<br>reductase                    | ABM64802 | 10  | 26  | 1719.95 | 1718.94 | 1718.95  | -4  | 1 | 1 | RACVVGSGFVA<br>SLLVK               |
|    |                                               |          | 32  | 40  | 980.5   | 979.493 | 979.5087 | -16 | 0 | 0 | GYAVNTTVR                          |
|    |                                               |          | 32  | 46  | 1677.82 | 1676.81 | 1676.812 | 1   | 1 | 1 | GYAVNTTVRDPD<br>NQK                |

|    |                            |          |     |     |         |         |          |     |   |                               |
|----|----------------------------|----------|-----|-----|---------|---------|----------|-----|---|-------------------------------|
|    |                            |          | 47  | 61  | 1693.98 | 1692.97 | 1692.977 | -3  | 1 | KISHLVTLQELGDL<br>K           |
|    |                            |          | 48  | 61  | 1565.89 | 1564.88 | 1564.882 | 0   | 0 | ISHLVTLQELGDLK                |
|    |                            |          | 125 | 149 | 2535.31 | 2534.3  | 2534.315 | -5  | 0 | VVLTSSAAAVSINT<br>LDGTDLVMTEK |
|    |                            |          | 150 | 171 | 2496.24 | 2495.23 | 2495.201 | 13  | 0 | DWTDIEFLSSAKP<br>PTWGYPAK     |
|    |                            |          | 248 | 255 | 914.5   | 913.493 | 913.5021 | -10 | 0 | AHVFLAEK                      |
|    |                            |          | 248 | 261 | 1501.77 | 1500.76 | 1500.769 | -4  | 1 | AHVFLAEKESASG<br>R            |
|    |                            |          | 256 | 276 | 2239.15 | 2238.14 | 2238.095 | 21  | 1 | ESASGRYICSAVN<br>TSVPELAK     |
|    |                            |          | 262 | 276 | 1651.85 | 1650.84 | 1650.829 | 9   | 0 | YICSAVNTSVPEL<br>AK           |
|    |                            |          | 281 | 286 | 825.41  | 824.403 | 824.4181 | -19 | 1 | RYPDFK                        |
|    |                            |          | 282 | 299 | 2085.03 | 2084.02 | 2084.026 | -1  | 1 | YPDFKVPTDFGDF<br>PSKPK        |
|    |                            |          | 287 | 299 | 1434.72 | 1433.71 | 1433.719 | -4  | 0 | VPTDFGDFPSKPK                 |
|    |                            |          | 307 | 315 | 1027.54 | 1026.53 | 1026.539 | -6  | 0 | LISEGFSFK                     |
|    |                            |          | 316 | 330 | 1862.91 | 1861.9  | 1861.899 | 2   | 0 | YGIEEIIDQTVEYL<br>K           |
| 69 | luminal binding<br>protein | FJ415200 | 314 | 331 | 2052.96 | 2051.96 | 2052.01  | -24 | 0 | VEIESLFDGVDFS<br>EPLTR        |
|    |                            |          | 332 | 343 | 1523.74 | 1522.73 | 1522.75  | -13 | 1 | ARFEELNNDLFR                  |
|    |                            |          | 334 | 343 | 1296.6  | 1295.6  | 1295.61  | -15 | 0 | FEELNNDLFR                    |
|    |                            |          | 361 | 374 | 1473.77 | 1472.77 | 1472.78  | -13 | 0 | SQIDEIVLVGGSTR                |
|    |                            |          | 384 | 393 | 1212.54 | 1211.53 | 1211.55  | -8  | 1 | DYFDGKEPNK                    |
|    |                            |          | 394 | 421 | 2661.2  | 2660.2  | 2660.26  | -22 | 0 | GVNPDEAVAYGA                  |



|    |                         |          |     |         |         |         |         |    |   |                |               |
|----|-------------------------|----------|-----|---------|---------|---------|---------|----|---|----------------|---------------|
|    |                         |          |     |         |         |         |         |    |   | AVQGGILSGEGG   |               |
|    |                         |          |     |         |         |         |         |    |   | DETK           |               |
|    |                         | 456      | 479 | 2819.34 | 2818.33 | 2818.38 | -17     | 1  |   | KSQVFTTYQDQQ   |               |
|    |                         |          |     |         |         |         |         |    |   | TTVSIQVFEGER   |               |
|    |                         | 457      | 479 | 2691.24 | 2690.24 | 2690.28 | -18     | 0  |   | SQVFTTYQDQQT   |               |
|    |                         |          |     |         |         |         |         |    |   | TVSIQVFEGER    |               |
|    |                         | 487      | 501 | 1594.91 | 1593.91 | 1593.92 | -12     | 1  |   | LLGKFDLTGIPPAP |               |
|    |                         |          |     |         |         |         |         |    |   | R              |               |
|    |                         | 491      | 501 | 1183.63 | 1182.62 | 1182.64 | -16     | 0  |   | FDLTGIPPAPR    |               |
|    |                         | 542      | 549 | 1003.47 | 1002.46 | 1002.5  | -29     | 0  |   | LSQEEIER       |               |
|    |                         | 553      | 563 | 1324.57 | 1323.56 | 1323.58 | -15     | 1  |   | EAEFEAEEDKK    |               |
|    |                         | 572      | 582 | 1391.63 | 1390.62 | 1390.64 | -14     | 0  |   | NSLETYIYNMK    | Oxidation (M) |
|    |                         | 609      | 628 | 2441.01 | 2440.01 | 2440.06 | -20     | 1  |   | EALEWLDDNQSA   |               |
|    |                         |          |     |         |         |         |         |    |   | EKEDYEK        |               |
|    |                         | 629      | 646 | 2103.08 | 2102.08 | 2102.12 | -19     | 1  |   | LKEVEAVCNPIITA |               |
|    |                         |          |     |         |         |         |         |    |   | VYQR           |               |
|    |                         | 631      | 646 | 1861.91 | 1860.9  | 1860.94 | -21     | 0  |   | EVEAVCNPIITAVY |               |
|    |                         |          |     |         |         |         |         |    |   | QR             |               |
|    |                         | 647      | 666 | 1931.85 | 1930.84 | 1930.73 | 56      | 0  |   | SGGAPGGGSTEE   |               |
|    |                         |          |     |         |         |         |         |    |   | DDDSHDEL       |               |
| 70 | luminal binding protein | FJ415200 | 314 | 331     | 2053.1  | 2052.09 | 2052.01 | 43 | 0 | VEIESLFDGVDFS  |               |
|    |                         |          |     |         |         |         |         |    |   | EPLTR          |               |
|    |                         |          |     |         |         |         |         |    |   | FEELNNDLFR     |               |
|    |                         |          |     |         |         |         |         |    |   | SQIDEIVLVGGSTR |               |
|    |                         |          |     |         |         |         |         |    |   | GVNPDEAVAYGA   |               |
|    |                         | 394      | 421 | 2661.36 | 2660.35 | 2660.26 | 33      | 0  |   | AVQGGILSGEGG   |               |
|    |                         |          |     |         |         |         |         |    |   | DETK           |               |
|    |                         | 457      | 479 | 2691.41 | 2690.4  | 2690.28 | 44      | 0  |   | SQVFTTYQDQQT   |               |

|    |                         |          |     |     |         |         |         |    |   |                |
|----|-------------------------|----------|-----|-----|---------|---------|---------|----|---|----------------|
|    |                         |          |     |     |         |         |         |    |   | TVSIQVFEGER    |
|    |                         |          | 502 | 521 | 2144.2  | 2143.2  | 2143.12 | 37 | 0 | GTPQIEVTFEVDA  |
|    |                         |          |     |     |         |         |         |    |   | NGILNVK        |
|    |                         |          | 542 | 549 | 1003.58 | 1002.57 | 1002.5  | 79 | 0 | LSQEEIER       |
|    |                         |          | 631 | 646 | 1862.02 | 1861.02 | 1860.94 | 42 | 0 | EVEAVCNPIITAVY |
|    |                         |          |     |     |         |         |         |    |   | QR             |
|    |                         |          | 647 | 666 | 1931.84 | 1930.84 | 1930.73 | 56 | 0 | SGGAPGGGSTE    |
|    |                         |          |     |     |         |         |         |    |   | DDDSHDEL       |
| 72 | luminal binding protein | FJ415200 | 314 | 331 | 2053.05 | 2052.05 | 2052.01 | 19 | 0 | VEIESLFDGVD    |
|    |                         |          |     |     |         |         |         |    |   | FS             |
|    |                         |          |     |     |         |         |         |    |   | EPLTR          |
|    |                         |          | 334 | 343 | 1296.67 | 1295.66 | 1295.61 | 38 | 0 | FEELNNDLFR     |
|    |                         |          | 361 | 374 | 1473.84 | 1472.83 | 1472.78 | 33 | 0 | SQIDEIVLVGG    |
|    |                         |          |     |     |         |         |         |    |   | STR            |
|    |                         |          |     |     |         |         |         |    |   | GVNPDEAVAYGA   |
|    |                         |          | 394 | 421 | 2661.31 | 2660.31 | 2660.26 | 18 | 0 | AVQGGILSGEGG   |
|    |                         |          |     |     |         |         |         |    |   | DETK           |
|    |                         |          | 457 | 479 | 2691.36 | 2690.35 | 2690.28 | 26 | 0 | SQVFTTYQDQQT   |
|    |                         |          |     |     |         |         |         |    |   | TVSIQVFEGER    |
|    |                         |          | 502 | 521 | 2144.14 | 2143.13 | 2143.12 | 9  | 0 | GTPQIEVTFEVDA  |
|    |                         |          |     |     |         |         |         |    |   | NGILNVK        |
|    |                         |          | 542 | 549 | 1003.54 | 1002.53 | 1002.5  | 29 | 0 | LSQEEIER       |
|    |                         |          | 609 | 622 | 1647.8  | 1646.79 | 1646.74 | 30 | 0 | EALEWLDDNQSA   |
|    |                         |          |     |     |         |         |         |    |   | EK             |
|    |                         |          | 631 | 646 | 1861.98 | 1860.98 | 1860.94 | 21 | 0 | EVEAVCNPIITAVY |
|    |                         |          |     |     |         |         |         |    |   | QR             |
|    |                         |          | 647 | 666 | 1931.77 | 1930.77 | 1930.73 | 20 | 0 | SGGAPGGGSTE    |
|    |                         |          |     |     |         |         |         |    |   | DDDSHDEL       |
| 74 | phosphoglycerate kinase | FJ415172 | 20  | 41  | 2577.38 | 2576.37 | 2576.29 | 31 | 1 | VFVRVDLNVPLDD  |
|    |                         |          |     |     |         |         |         |    |   | NFNITDDTR      |

|    |                                   |          |     |     |         |         |          |    |   |                                      |
|----|-----------------------------------|----------|-----|-----|---------|---------|----------|----|---|--------------------------------------|
|    |                                   |          | 24  | 41  | 2076.06 | 2075.05 | 2074.98  | 33 | 0 | VDLNVPLDDNFNI<br>TDDTR               |
|    |                                   |          | 51  | 69  | 2080.2  | 2079.19 | 2079.14  | 24 | 1 | YLMGHGSKVILSS<br>HLGRPK              |
|    |                                   |          | 59  | 69  | 1206.8  | 1205.79 | 1205.72  | 58 | 0 | VILSSHLGRPK                          |
|    |                                   |          | 75  | 83  | 1072.71 | 1071.7  | 1071.64  | 46 | 0 | YSLKPLVPR                            |
|    |                                   |          | 75  | 93  | 2140.34 | 2139.34 | 2139.27  | 32 | 1 | YSLKPLVPRLSELL<br>GVEVK              |
|    |                                   |          | 84  | 93  | 1086.66 | 1085.65 | 1085.63  | 18 | 0 | LSELLGVEVK                           |
|    |                                   |          | 106 | 122 | 1767.07 | 1766.06 | 1765.98  | 50 | 0 | MVAALPDGGVLLL<br>ENVR                |
|    |                                   |          | 137 | 155 | 2062.15 | 2061.14 | 2061.06  | 38 | 1 | KLASLADLYVNDA<br>FGTAHR              |
|    |                                   |          | 138 | 155 | 1934.04 | 1933.04 | 1932.97  | 36 | 0 | LASLADLYVNDAF<br>GTAHR               |
|    |                                   |          | 138 | 165 | 2885.57 | 2884.56 | 2884.45  | 38 | 1 | LASLADLYVNDAF<br>GTAHRAHASTEG<br>VAK |
|    |                                   |          | 233 | 257 | 2610.45 | 2609.45 | 2609.35  | 34 | 1 | AQGHAVGSSLVE<br>EDKLDLATSLEK         |
|    |                                   |          | 262 | 284 | 2316.33 | 2315.32 | 2315.24  | 38 | 1 | GVLLLLPSDVVVA<br>DKFAADANSK          |
|    |                                   |          | 343 | 366 | 2272.3  | 2271.29 | 2271.23  | 26 | 1 | LAELSGKGVTTIIG<br>GGDSVAAVEK         |
| 75 | chloroplast biotin<br>carboxylase | ABP98813 | 12  | 25  | 1473.87 | 1472.86 | 1472.81  | 33 | 1 | SVTSPGLFLGRS<br>R                    |
|    |                                   |          | 72  | 83  | 1310.89 | 1309.88 | 1309.783 | 75 | 1 | ILVANRGEIAVR                         |
|    |                                   |          | 167 | 178 | 1342.81 | 1341.8  | 1341.704 | 70 | 0 | INFIGPNPDSIR                         |

|    |                                   |          |     |     |         |         |          |    |   |                              |                 |
|----|-----------------------------------|----------|-----|-----|---------|---------|----------|----|---|------------------------------|-----------------|
|    |                                   |          | 214 | 225 | 1370.86 | 1369.85 | 1369.743 | 80 | 0 | LAHEIGFPVMIK                 | Oxidation (M)   |
|    |                                   |          | 247 | 268 | 2323.32 | 2322.31 | 2322.186 | 54 | 1 | LLQQAKSEAAAAF<br>GNDGVYLEK   |                 |
|    |                                   |          | 253 | 268 | 1641.89 | 1640.88 | 1640.768 | 67 | 0 | SEAAAAFGNDGV<br>YLEK         |                 |
|    |                                   |          | 305 | 319 | 1636    | 1635    | 1634.888 | 67 | 0 | LLEEAPSPALTPEL<br>R          |                 |
|    |                                   |          | 305 | 320 | 1764.11 | 1763.11 | 1762.983 | 70 | 1 | LLEEAPSPALTPEL<br>RK         |                 |
|    |                                   |          | 349 | 359 | 1414.66 | 1413.66 | 1413.569 | 62 | 0 | GSFYFMENR                    | 2 Oxidation (M) |
|    |                                   |          | 360 | 381 | 2565.43 | 2564.43 | 2564.316 | 43 | 0 | IQVEHPVTEMISSV<br>DLIEEQIR   |                 |
|    |                                   |          | 360 | 381 | 2581.41 | 2580.4  | 2580.311 | 34 | 0 | IQVEHPVTEMISSV<br>DLIEEQIR   | Oxidation (M)   |
|    |                                   |          | 390 | 398 | 1163.73 | 1162.72 | 1162.635 | 71 | 1 | YKQEDIVLR                    |                 |
|    |                                   |          | 399 | 405 | 858.412 | 857.405 | 857.3814 | 27 | 0 | GHSIECR                      |                 |
|    |                                   |          | 406 | 421 | 1732.01 | 1731    | 1730.885 | 66 | 1 | INAEDAFKGFPRG<br>PGR         |                 |
|    |                                   |          | 414 | 421 | 843.484 | 842.477 | 842.4511 | 30 | 0 | GFRPGPGR                     |                 |
|    |                                   |          | 422 | 434 | 1393.85 | 1392.85 | 1392.74  | 77 | 0 | ITSYLPSSGGPFVR               |                 |
|    |                                   |          | 456 | 463 | 955.623 | 954.616 | 954.5651 | 53 | 0 | LIVWAPTR                     |                 |
|    |                                   |          | 456 | 465 | 1212.83 | 1211.82 | 1211.703 | 99 | 1 | LIVWAPTR                     |                 |
|    |                                   |          | 491 | 499 | 1133.7  | 1132.69 | 1132.613 | 72 | 0 | LILDIEDFR                    |                 |
| 77 | chloroplast biotin<br>carboxylase | ABP98813 | 72  | 83  | 1310.79 | 1309.79 | 1309.783 | 2  | 1 | ILVANRGEIAVR                 |                 |
|    |                                   |          | 87  | 110 | 2655.32 | 2654.31 | 2654.32  | -4 | 1 | TAHEMGIPCVAVY<br>STIDKDALHVK |                 |
|    |                                   |          | 87  | 110 | 2671.37 | 2670.37 | 2670.315 | 19 | 1 | TAHEMGIPCVAVY                | Oxidation (M)   |

|     |     |         |         |          |    |   |   |                |                 |
|-----|-----|---------|---------|----------|----|---|---|----------------|-----------------|
|     |     |         |         |          |    |   |   | STIDKDALHVK    |                 |
|     |     |         |         |          |    |   |   | LADESVGIGEAPS  |                 |
| 111 | 140 | 3160.73 | 3159.72 | 3159.612 | 34 | 0 | 0 | SQSYLLIPNVLSSA |                 |
|     |     |         |         |          |    |   |   | ISR            |                 |
| 141 | 163 | 2732.27 | 2731.26 | 2731.202 | 22 | 0 | 0 | NCTMLHPGYGFL   |                 |
|     |     |         |         |          |    |   |   | SENAVFEVEMCR   |                 |
| 167 | 178 | 1342.71 | 1341.7  | 1341.704 | -3 | 0 | 0 | INFIGPNPDSIR   |                 |
| 192 | 213 | 2183.13 | 2182.12 | 2182.112 | 5  | 0 | 0 | NAGVPTVPGSDG   |                 |
|     |     |         |         |          |    |   |   | LLQSTEEAIK     |                 |
| 214 | 225 | 1354.75 | 1353.74 | 1353.748 | -2 | 0 | 0 | LAHEIGFPVMIK   |                 |
| 214 | 225 | 1370.76 | 1369.75 | 1369.743 | 8  | 0 | 0 | LAHEIGFPVMIK   | Oxidation (M)   |
| 253 | 268 | 1641.79 | 1640.78 | 1640.768 | 6  | 0 | 0 | SEAAAAFGNDGV   |                 |
|     |     |         |         |          |    |   |   | YLEK           |                 |
| 285 | 294 | 1177.59 | 1176.59 | 1176.568 | 15 | 0 | 0 | YGNVVHFGER     |                 |
| 285 | 300 | 1936.92 | 1935.91 | 1935.901 | 6  | 1 | 1 | YGNVVHFGERDC   |                 |
|     |     |         |         |          |    |   |   | SIQR           |                 |
| 305 | 319 | 1635.9  | 1634.89 | 1634.888 | 4  | 0 | 0 | LLEEAPSPALTPEL |                 |
|     |     |         |         |          |    |   |   | R              |                 |
| 305 | 320 | 1764.01 | 1763    | 1762.983 | 11 | 1 | 1 | LLEEAPSPALTPEL |                 |
|     |     |         |         |          |    |   |   | RK             |                 |
|     |     |         |         |          |    |   |   | KAMGDAAVAAAA   |                 |
| 320 | 348 | 2911.64 | 2910.63 | 2910.48  | 52 | 1 | 1 | SIGYIGVGTVEFL  | Oxidation (M)   |
|     |     |         |         |          |    |   |   | DER            |                 |
| 349 | 359 | 1382.59 | 1381.59 | 1381.58  | 5  | 0 | 0 | GSFYFMEMNTR    |                 |
| 349 | 359 | 1398.6  | 1397.59 | 1397.574 | 13 | 0 | 0 | GSFYFMEMNTR    | Oxidation (M)   |
| 349 | 359 | 1414.6  | 1413.59 | 1413.569 | 13 | 0 | 0 | GSFYFMEMNTR    | 2 Oxidation (M) |
| 360 | 381 | 2581.33 | 2580.33 | 2580.311 | 6  | 0 | 0 | IQVEHPVTEMISSV |                 |
|     |     |         |         |          |    |   |   | DLIEEQIR       | Oxidation (M)   |

|    |                                   |          |     |     |         |         |          |    |   |                                     |
|----|-----------------------------------|----------|-----|-----|---------|---------|----------|----|---|-------------------------------------|
|    |                                   |          | 390 | 398 | 1163.65 | 1162.65 | 1162.635 | 10 | 1 | YKQEDIVLR                           |
|    |                                   |          | 414 | 421 | 843.463 | 842.456 | 842.4511 | 5  | 0 | GFRPGPGR                            |
|    |                                   |          | 422 | 434 | 1393.76 | 1392.75 | 1392.74  | 9  | 0 | ITSYLPSGGPFVR                       |
|    |                                   |          | 435 | 455 | 2372.14 | 2371.13 | 2371.104 | 12 | 0 | MDSHVYSDYVVP<br>PSYDSLLGK           |
|    |                                   |          | 456 | 463 | 955.57  | 954.563 | 954.5651 | -2 | 0 | LIVWAPTR                            |
|    |                                   |          | 491 | 499 | 1133.63 | 1132.62 | 1132.613 | 9  | 0 | LILDIEDFR                           |
|    |                                   |          | 503 | 520 | 2023.08 | 2022.07 | 2022.042 | 16 | 1 | VDTAFIPKHEEELA<br>APQK              |
| 76 | dihydrolipoamide<br>dehydrogenase | FJ415193 | 116 | 130 | 1666.86 | 1665.85 | 1665.81  | 24 | 0 | FSSVEIDLPA<br>MMQA<br>QK            |
|    |                                   |          | 159 | 178 | 2051.09 | 2050.08 | 2050.05  | 19 | 0 | FISPSEVSVDTIEG<br>GSTVVK            |
|    |                                   |          | 238 | 260 | 2474.3  | 2473.29 | 2473.24  | 20 | 0 | LGSEVTVVEFAPD<br>IVPSMDAEIR         |
|    |                                   |          | 292 | 316 | 2469.32 | 2468.32 | 2468.28  | 16 | 0 | LTVEPAAGGDQTT<br>LEADVVLVSAGR       |
|    |                                   |          | 317 | 327 | 1105.61 | 1104.6  | 1104.58  | 18 | 0 | SPFTAGLGLDK                         |
|    |                                   |          | 367 | 381 | 1594.79 | 1593.78 | 1593.73  | 31 | 0 | AEEDGVACVEFIA<br>GK                 |
|    |                                   |          | 422 | 429 | 951.53  | 950.52  | 950.5    | 31 | 0 | FPFLANSR                            |
|    |                                   |          | 497 | 509 | 1459.76 | 1458.75 | 1458.72  | 27 | 0 | EAAMATYDKPIHI<br>SAVAALSEISENE<br>K |
| 78 | UGP2                              | FJ415165 | 9   | 22  | 1447.77 | 1446.76 | 1446.72  | 27 | 0 | NGFINLVSR                           |
|    |                                   |          | 23  | 31  | 1019.55 | 1018.55 | 1018.56  | -9 | 0 | YLSGEAQHIEWSK                       |
|    |                                   |          | 32  | 44  | 1547.8  | 1546.79 | 1546.74  | 32 | 0 | IQTPTDEVVVPYD<br>TLSPSPDDPAETK      |
|    |                                   |          | 45  | 70  | 2814.34 | 2813.33 | 2813.35  | -7 | 0 |                                     |







|     |     |         |         |         |     |   |                                     |               |
|-----|-----|---------|---------|---------|-----|---|-------------------------------------|---------------|
| 81  | 95  | 1463.81 | 1462.8  | 1462.69 | 75  | 0 | LNGGLGTTMGCT<br>GPK                 |               |
| 96  | 119 | 2789.79 | 2788.79 | 2788.51 | 100 | 1 | SVIEVRNGFTFLDL<br>IVQQIENLNK        |               |
| 102 | 120 | 2234.29 | 2233.29 | 2233.21 | 35  | 1 | NGFTFLDLIVQQIE<br>NLNKK             |               |
| 121 | 141 | 2438.31 | 2437.3  | 2437.14 | 65  | 0 | YGCNVPLVLMNSF<br>NTHDDTLK           |               |
| 121 | 141 | 2454.31 | 2453.3  | 2453.14 | 69  | 0 | YGCNVPLVLMNSF<br>NTHDDTLK           | Oxidation (M) |
| 142 | 163 | 2636.52 | 2635.51 | 2635.31 | 75  | 1 | IVDKYANSNIQIHT<br>FNQSQYPR          |               |
| 146 | 163 | 2181.19 | 2180.19 | 2180.04 | 68  | 0 | YANSNIQIHTFNQ<br>SQYPR              |               |
| 164 | 175 | 1423.82 | 1422.81 | 1422.69 | 84  | 0 | LVAEDFTPFPCK<br>DGWYPPGHGDVF        |               |
| 181 | 200 | 2145.13 | 2144.12 | 2143.98 | 65  | 0 | PALMNSGK<br>DGWYPPGHGDVF            |               |
| 181 | 200 | 2161.13 | 2160.12 | 2159.97 | 64  | 0 | DGWYPPGHGDVF<br>PALMNSGK            | Oxidation (M) |
| 201 | 227 | 2942.68 | 2941.67 | 2941.51 | 54  | 1 | LATFLSQDKEYAF<br>VANSNDLGAIVDL<br>K |               |
| 235 | 246 | 1512.82 | 1511.81 | 1511.67 | 92  | 1 | NKNEYCMEVTPK<br>VQLLEIAQVPDAH       |               |
| 263 | 280 | 2050.23 | 2049.22 | 2049.09 | 63  | 0 | VNEFK<br>IFNTNNLWLNINA              |               |
| 287 | 301 | 1774.06 | 1773.05 | 1772.96 | 56  | 0 | VK                                  |               |
| 325 | 337 | 1312.88 | 1311.87 | 1311.75 | 91  | 0 | VLQLETAAGAAIR                       |               |

|    |      |          |     |     |         |         |         |    |   |                                 |
|----|------|----------|-----|-----|---------|---------|---------|----|---|---------------------------------|
|    |      |          | 338 | 349 | 1399.87 | 1398.87 | 1398.74 | 92 | 0 | FFEHAIGINVPR                    |
|    |      |          | 357 | 378 | 2412.44 | 2411.43 | 2411.26 | 70 | 0 | ATSDLLLQSDLY<br>TLVDGFVSR       |
|    |      |          | 383 | 397 | 1699.96 | 1698.96 | 1698.81 | 88 | 0 | ENPENPSIELGPE<br>FK             |
|    |      |          | 383 | 398 | 1828.05 | 1827.05 | 1826.9  | 76 | 1 | ENPENPSIELGPE<br>FKK            |
| 81 | UGD1 | FJ415166 | 23  | 37  | 1668.94 | 1667.93 | 1667.86 | 47 | 0 | CPDIEAVVDISVP<br>R              |
|    |      |          | 38  | 58  | 2285.24 | 2284.24 | 2284.17 | 26 | 0 | IAAWNSDQLPIYE<br>PGLDGVVK       |
|    |      |          | 64  | 73  | 1199.65 | 1198.64 | 1198.59 | 41 | 0 | NLFFSTDVEK<br>EADIVFVSVNTPT     |
|    |      |          | 77  | 90  | 1519.87 | 1518.86 | 1518.79 | 46 | 0 | K                               |
|    |      |          | 99  | 110 | 1353.72 | 1352.72 | 1352.64 | 59 | 0 | AADLTYWESAAR<br>GIKFQILSNPEFLA  |
|    |      |          | 146 | 172 | 3033.67 | 3032.66 | 3032.56 | 32 | 1 | EGTAIQDLFNPDR<br>FQILSNPEFLAEGT |
|    |      |          | 149 | 172 | 2735.46 | 2734.45 | 2734.36 | 32 | 0 | AIQDLFNPDR<br>AVQALKEVYAHW      |
|    |      |          | 186 | 202 | 2025.12 | 2024.11 | 2024.05 | 34 | 1 | VPEER                           |
|    |      |          | 192 | 202 | 1414.75 | 1413.75 | 1413.67 | 56 | 0 | EYAHWVPEER                      |
|    |      |          | 203 | 215 | 1475.87 | 1474.86 | 1474.8  | 40 | 0 | ILTTNLWSAELSK<br>ILTTNLWSAELSKL |
|    |      |          | 203 | 225 | 2531.46 | 2530.45 | 2530.39 | 23 | 1 | AANAFLAQR                       |
|    |      |          | 216 | 225 | 1074.66 | 1073.65 | 1073.6  | 46 | 0 | LAANAFLAQR<br>FLNASVGGSCF       |
|    |      |          | 260 | 274 | 1618.86 | 1617.85 | 1617.76 | 55 | 0 | QK                              |

|    |      |          |     |     |         |         |         |     |   |                                 |
|----|------|----------|-----|-----|---------|---------|---------|-----|---|---------------------------------|
|    |      |          | 275 | 300 | 3166.74 | 3165.73 | 3165.59 | 44  | 1 | DILNLYVYICECNGL<br>PEVAEYWKQVIK |
|    |      |          | 326 | 334 | 979.61  | 978.6   | 978.59  | 10  | 0 | IAILGFAFK                       |
|    |      |          | 326 | 335 | 1107.73 | 1106.73 | 1106.69 | 36  | 1 | IAILGFAFKK                      |
|    |      |          | 359 | 373 | 1790.97 | 1789.96 | 1789.88 | 44  | 0 | LSIYDPQVTEQV<br>QR              |
|    |      |          | 374 | 397 | 2837.48 | 2836.47 | 2836.37 | 38  | 1 | DLSMKNKFDWDHP<br>LHLQPMSPPTVK   |
|    |      |          | 411 | 425 | 1833.91 | 1832.9  | 1832.84 | 32  | 0 | DAHGICILTEWDE<br>FK             |
|    |      |          | 411 | 426 | 1962.01 | 1961    | 1960.94 | 35  | 1 | DAHGICILTEWDE<br>FKK            |
|    |      |          | 432 | 446 | 1800.95 | 1799.94 | 1799.87 | 38  | 0 | IYDNMQKPAFVFD<br>GR             |
|    |      |          | 447 | 455 | 1043.57 | 1042.56 | 1042.54 | 19  | 0 | NIVNADEL                        |
|    |      |          | 456 | 473 | 2075.22 | 2074.22 | 2074.15 | 33  | 0 | EIGFIVYSIGKPLD<br>PWLK          |
| 83 | UGD1 | FJ415166 | 3   | 22  | 2050.97 | 2049.96 | 2050.04 | -39 | 0 | ICCIGAGYVGGPT<br>MAVIALK        |
|    |      |          | 23  | 37  | 1668.82 | 1667.81 | 1667.86 | -23 | 0 | CPDIEAVVDISVP<br>R              |
|    |      |          | 38  | 58  | 2285.11 | 2284.1  | 2284.17 | -35 | 0 | IAAWNSDQLPIYE<br>PGLDGVVK       |
|    |      |          | 64  | 73  | 1199.56 | 1198.55 | 1198.59 | -25 | 0 | NLFFSTDVEK                      |
|    |      |          | 99  | 110 | 1353.62 | 1352.61 | 1352.64 | -22 | 0 | AADLTYWESAAR                    |
|    |      |          | 149 | 172 | 2735.32 | 2734.31 | 2734.36 | -18 | 0 | FQILSNPEFLAEGT<br>AIQDLFNPDR    |
|    |      |          | 192 | 202 | 1414.66 | 1413.65 | 1413.67 | -14 | 0 | EVYAHWWPEER                     |

|    |                                       |          |     |     |         |         |         |     |   |                              |
|----|---------------------------------------|----------|-----|-----|---------|---------|---------|-----|---|------------------------------|
|    |                                       |          | 203 | 215 | 1475.78 | 1474.77 | 1474.8  | -20 | 0 | ILTTNLWSAELSK                |
|    |                                       |          | 216 | 225 | 1074.58 | 1073.57 | 1073.6  | -27 | 0 | LAANAFLAQR                   |
|    |                                       |          | 260 | 274 | 1618.73 | 1617.72 | 1617.76 | -24 | 0 | FLNASVGFGGSCF<br>QK          |
|    |                                       |          | 275 | 296 | 2698.22 | 2697.21 | 2697.28 | -25 | 0 | DILNLVYICECNGL<br>PEVAEYWK   |
|    |                                       |          | 326 | 334 | 979.56  | 978.55  | 978.59  | -40 | 0 | IAILGFAFK                    |
|    |                                       |          | 359 | 373 | 1790.85 | 1789.84 | 1789.88 | -27 | 0 | LSIYDPQVTEDQV<br>QR          |
|    |                                       |          | 380 | 397 | 2148.98 | 2147.98 | 2148.05 | -32 | 0 | FDWDHPLHLQPM<br>SPTTVK       |
|    |                                       |          | 411 | 425 | 1833.79 | 1832.78 | 1832.84 | -32 | 0 | DAHGICILTEWDE<br>FK          |
|    |                                       |          | 411 | 426 | 1961.88 | 1960.88 | 1960.94 | -30 | 1 | DAHGICILTEWDE<br>FKK         |
|    |                                       |          | 432 | 446 | 1800.83 | 1799.82 | 1799.87 | -22 | 0 | IYDNMQKPAFVFD<br>GR          |
|    |                                       |          | 447 | 455 | 1043.53 | 1042.52 | 1042.54 | -19 | 0 | NIVNADELK                    |
| 82 | myo-inositol-1-<br>phosphate synthase | FJ415168 | 1   | 7   | 928.46  | 927.45  | 927.45  | 0   | 0 | MFIENFK                      |
|    |                                       |          | 1   | 14  | 1681.85 | 1680.84 | 1680.85 | -5  | 1 | MFIENFKVESPNV<br>K           |
|    |                                       |          | 48  | 54  | 914.48  | 913.47  | 913.49  | -21 | 1 | TVKYEFK                      |
|    |                                       |          | 51  | 61  | 1376.72 | 1375.71 | 1375.71 | 0   | 1 | YEFKTDIHVPK                  |
|    |                                       |          | 62  | 85  | 2315.17 | 2314.16 | 2314.21 | -21 | 0 | LGVMLVGWGGNN<br>GSTLTGGVIANK |
|    |                                       |          | 86  | 93  | 891.44  | 890.43  | 890.45  | -22 | 0 | EGISWATK                     |
|    |                                       |          | 94  | 112 | 2127.07 | 2126.06 | 2126.08 | -9  | 1 | DKVQQANYFGSL                 |

|     |     |         |         |         |     |   |   |                |
|-----|-----|---------|---------|---------|-----|---|---|----------------|
|     |     |         |         |         |     |   |   | TQASTIR        |
| 96  | 112 | 1883.96 | 1882.95 | 1882.95 | 0   | 0 | 0 | VQQANYFGSLTQ   |
|     |     |         |         |         |     |   |   | ASTIR          |
| 113 | 126 | 1587.76 | 1586.75 | 1586.76 | -6  | 0 | 0 | IGSYNGEEIYAPFK |
| 156 | 165 | 1176.65 | 1175.64 | 1175.65 | -8  | 1 | 1 | AKVFDIDLQK     |
|     |     |         |         |         |     |   |   | QLRPYMESMVPL   |
| 166 | 193 | 3207.49 | 3206.49 | 3206.55 | -21 | 0 | 0 | PGIYDPDFIAANQ  |
|     |     |         |         |         |     |   |   | GER            |
| 204 | 214 | 1327.74 | 1326.73 | 1326.75 | -15 | 1 | 1 | EQVQQVIKDIK    |
| 225 | 235 | 1287.71 | 1286.7  | 1286.7  | 0   | 0 | 0 | VVLWTANTER     |
| 299 | 308 | 1138.51 | 1137.5  | 1137.51 | -8  | 0 | 0 | NCLIGGDDFK     |
|     |     |         |         |         |     |   |   | NCLIGGDDFKSGQ  |
| 299 | 313 | 1639.79 | 1638.78 | 1638.77 | 6   | 1 | 1 | TK             |
| 388 | 396 | 1027.5  | 1026.49 | 1026.5  | -9  | 0 | 0 | YVPYVGDSK      |
| 388 | 397 | 1183.61 | 1182.6  | 1182.6  | 0   | 1 | 1 | YVPYVGDSKR     |
|     |     |         |         |         |     |   |   | RAMDEYTSEIFMG  |
| 397 | 411 | 1734.78 | 1733.77 | 1733.78 | 0   | 1 | 1 | GK             |
|     |     |         |         |         |     |   |   | AMDEYTSEIFMGG  |
| 398 | 411 | 1578.68 | 1577.68 | 1577.67 | 0   | 0 | 0 | K              |
|     |     |         |         |         |     |   |   | NTIVLHNTCEDSLL |
| 412 | 442 | 3417.97 | 3416.96 | 3416.86 | 29  | 0 | 0 | AAPILDLVLLAELS |
|     |     |         |         |         |     |   |   | TR             |
|     |     |         |         |         |     |   |   | FHSFHPVATILSYL |
| 453 | 468 | 1860.97 | 1859.97 | 1859.99 | -16 | 0 | 0 | TK             |
|     |     |         |         |         |     |   |   | APLVPPGTPVVNA  |
| 469 | 484 | 1559.91 | 1558.9  | 1558.91 | -6  | 0 | 0 | LSK            |
| 487 | 494 | 959.51  | 958.5   | 958.53  | -31 | 0 | 0 | AMLENILR       |
| 495 | 510 | 1762.91 | 1761.9  | 1761.9  | 0   | 0 | 0 | ASIGLAPENNMILE |

| 84 | acyltransferase-like protein | AAL67994 | 40  | 52  | 1423.65 | 1422.64 | 1422.626 | 12  | 1 | YK            |               |
|----|------------------------------|----------|-----|-----|---------|---------|----------|-----|---|---------------|---------------|
|    |                              |          |     |     |         |         |          |     |   | NDGGGEFEDKVE  |               |
|    |                              |          |     |     |         |         |          |     |   | K             |               |
|    |                              |          | 59  | 70  | 1381.75 | 1380.74 | 1380.729 | 10  | 0 | VVLEEFYQLGGK  |               |
|    |                              |          | 71  | 80  | 1087.59 | 1086.58 | 1086.567 | 15  | 1 | LGKDDDGVLK    |               |
|    |                              |          | 213 | 221 | 1012.5  | 1011.49 | 1011.492 | 1   | 0 | QGQPAPQMR     |               |
|    |                              |          | 213 | 221 | 1028.52 | 1027.51 | 1027.487 | 25  | 0 | QGQPAPQMR     | Oxidation (M) |
|    |                              |          | 227 | 236 | 1107.62 | 1106.61 | 1106.597 | 14  | 1 | FSEAAVDKIK    |               |
|    |                              |          | 239 | 264 | 2855.43 | 2854.42 | 2854.44  | -6  | 0 | VNSTPPPSDGSKP |               |
|    |                              |          |     |     |         |         |          |     |   | FSTFQSLAVHIWR |               |
|    |                              |          | 271 | 287 | 2074.99 | 2073.98 | 2073.983 | 0   | 0 | NLKPEDYTVFTVF |               |
|    |                              |          |     |     |         |         |          |     |   | ADCR          |               |
|    |                              |          | 271 | 288 | 2203.08 | 2202.07 | 2202.078 | -2  | 1 | NLKPEDYTVFTVF |               |
|    |                              |          |     |     |         |         |          |     |   | ADCRK         |               |
|    |                              |          | 330 | 337 | 870.45  | 869.443 | 869.4243 | 21  | 0 | AIESHDAK      |               |
|    |                              |          | 352 | 370 | 2052.07 | 2051.06 | 2051.026 | 18  | 1 | IFQFKDAGVNCVA |               |
|    |                              |          |     |     |         |         |          |     |   | VGSSPR        |               |
|    |                              |          | 357 | 370 | 1388.67 | 1387.66 | 1387.651 | 8   | 0 | DAGVNCVAVGSS  |               |
|    |                              |          |     |     |         |         |          |     |   | PR            |               |
|    |                              |          | 371 | 387 | 1983.02 | 1982.01 | 1982.041 | -14 | 1 | FKVYEVDGFWGK  |               |
|    |                              |          |     |     |         |         |          |     |   | PVGVR         |               |
|    |                              |          | 373 | 387 | 1707.87 | 1706.86 | 1706.878 | -9  | 0 | VYEVDGFWGKPV  |               |
|    |                              |          |     |     |         |         |          |     |   | GVR           |               |
|    |                              |          | 388 | 404 | 1935.89 | 1934.88 | 1934.895 | -6  | 1 | SGSNNRFDGMVY  |               |
|    |                              |          |     |     |         |         |          |     |   | LYQGK         |               |
|    |                              |          | 388 | 404 | 1951.89 | 1950.88 | 1950.889 | -3  | 1 | SGSNNRFDGMVY  | Oxidation (M) |
|    |                              |          |     |     |         |         |          |     |   | LYQGK         |               |
|    |                              |          | 394 | 404 | 1320.65 | 1319.64 | 1319.622 | 16  | 0 | FDGMVYLYQGK   |               |

|    |                                 |          |     |     |         |         |          |     |   |                                |                 |
|----|---------------------------------|----------|-----|-----|---------|---------|----------|-----|---|--------------------------------|-----------------|
|    |                                 |          | 394 | 404 | 1336.63 | 1335.62 | 1335.617 | 4   | 0 | FDGMVYLYQQGK                   | Oxidation (M)   |
|    |                                 |          | 409 | 423 | 1694.8  | 1693.79 | 1693.79  | 1   | 0 | SIDVEITMEAQAM<br>EK            |                 |
|    |                                 |          | 409 | 423 | 1726.81 | 1725.8  | 1725.78  | 13  | 0 | SIDVEITMEAQAM<br>EK            | 2 Oxidation (M) |
|    |                                 |          | 409 | 426 | 2065.03 | 2064.02 | 2064.012 | 5   | 1 | SIDVEITMEAQAM<br>EKLEK         |                 |
|    |                                 |          | 409 | 426 | 2097.01 | 2096    | 2096.002 | 0   | 1 | SIDVEITMEAQAM<br>EKLEK         | 2 Oxidation (M) |
| 85 | acyltransferase-like<br>protein | AAL67994 | 59  | 70  | 1381.77 | 1380.76 | 1380.729 | 24  | 0 | VVLEEFYQLGGK                   |                 |
|    |                                 |          | 116 | 140 | 2814.56 | 2813.55 | 2813.617 | -23 | 0 | ELIPFNGVLNLEGL<br>HRPLLSIQLTK  |                 |
|    |                                 |          | 213 | 221 | 1012.53 | 1011.52 | 1011.492 | 30  | 0 | QGQPAPQMR                      |                 |
|    |                                 |          | 213 | 221 | 1028.54 | 1027.53 | 1027.487 | 45  | 0 | QGQPAPQMR                      | Oxidation (M)   |
|    |                                 |          | 227 | 236 | 1107.62 | 1106.61 | 1106.597 | 14  | 1 | FSEAAVDKIK<br>SRVNSTPPPSDG     |                 |
|    |                                 |          | 237 | 264 | 3098.85 | 3097.84 | 3097.573 | 87  | 1 | SKPFSTFQSLAVHI<br>WR           |                 |
|    |                                 |          | 239 | 264 | 2855.4  | 2854.39 | 2854.44  | -17 | 0 | VNSTPPPSDGSKP<br>FSTFQSLAVHIWR |                 |
|    |                                 |          | 271 | 287 | 2074.97 | 2073.96 | 2073.983 | -10 | 0 | NLKPEDYTVFTVF<br>ADCR          |                 |
|    |                                 |          | 271 | 288 | 2203.08 | 2202.07 | 2202.078 | -2  | 1 | NLKPEDYTVFTVF<br>ADCRK         |                 |
|    |                                 |          | 357 | 370 | 1388.7  | 1387.69 | 1387.651 | 30  | 0 | DAGVNCVAVGSS<br>PR             |                 |
|    |                                 |          | 371 | 387 | 1983.03 | 1982.02 | 1982.041 | -9  | 1 | FKVYEVDGFWGK                   |                 |

|    |                                     |          |     |     |         |         |          |     |   |  |                |               |
|----|-------------------------------------|----------|-----|-----|---------|---------|----------|-----|---|--|----------------|---------------|
|    |                                     |          |     |     |         |         |          |     |   |  | PVGVR          |               |
|    |                                     |          | 373 | 387 | 1707.85 | 1706.84 | 1706.878 | -21 | 0 |  | VYEVDGFWGKPV   |               |
|    |                                     |          |     |     |         |         |          |     |   |  | GVR            |               |
|    |                                     |          | 388 | 404 | 1935.88 | 1934.87 | 1934.895 | -11 | 1 |  | SGSNNRFDGMVY   |               |
|    |                                     |          |     |     |         |         |          |     |   |  | LYQGK          |               |
|    |                                     |          | 388 | 404 | 1951.89 | 1950.88 | 1950.889 | -3  | 1 |  | SGSNNRFDGMVY   | Oxidation (M) |
|    |                                     |          |     |     |         |         |          |     |   |  | LYQGK          |               |
|    |                                     |          | 405 | 423 | 2052    | 2050.99 | 2050.966 | 13  | 1 |  | SGGRSIDVEITME  |               |
|    |                                     |          |     |     |         |         |          |     |   |  | AQAMEK         |               |
| 86 | pyruvate<br>decarboxylase           | FJ415201 | 111 | 127 | 1951.05 | 1950.04 | 1949.97  | 35  | 0 |  | GDFQELDQIEAVK  |               |
|    |                                     |          |     |     |         |         |          |     |   |  | PFSK           |               |
|    |                                     |          | 137 | 144 | 959.51  | 958.5   | 958.45   | 52  | 0 |  | EIPDCVAR       |               |
|    |                                     |          | 236 | 247 | 1258.75 | 1257.74 | 1257.68  | 47  | 0 |  | TGIPFLPTPMGK   |               |
|    |                                     |          | 248 | 262 | 1538.83 | 1537.82 | 1537.75  | 45  | 0 |  | GLVNDDHELAASA  |               |
|    |                                     |          |     |     |         |         |          |     |   |  | AR             |               |
|    |                                     |          | 269 | 278 | 1059.62 | 1058.61 | 1058.55  | 56  | 0 |  | CDVALVVGAR     |               |
|    |                                     |          | 297 | 308 | 1420.83 | 1419.82 | 1419.75  | 49  | 0 |  | FILVDVSEEEIK   |               |
|    |                                     |          | 381 | 405 | 2411.31 | 2410.3  | 2410.22  | 33  | 0 |  | DAILGVGSPAPVV  |               |
|    |                                     |          |     |     |         |         |          |     |   |  | VSEGANTMDVGR   |               |
|    |                                     |          | 468 | 485 | 1875.08 | 1874.08 | 1874     | 37  | 0 |  | LPVVVIVFNNGGV  |               |
|    |                                     |          |     |     |         |         |          |     |   |  | YGGDR          |               |
|    |                                     |          | 497 | 520 | 2461.3  | 2460.29 | 2460.2   | 40  | 0 |  | DDPAPTSFVPGAA  |               |
|    |                                     |          |     |     |         |         |          |     |   |  | YHTLIEAFGGK    |               |
|    |                                     |          | 532 | 541 | 1054.57 | 1053.56 | 1053.51  | 47  | 0 |  | SALSESFSAR     |               |
|    |                                     |          | 542 | 560 | 1982.18 | 1981.18 | 1981.1   | 40  | 0 |  | KPVVINVIIDPFAG |               |
|    |                                     |          |     |     |         |         |          |     |   |  | AESGR          |               |
| 87 | glycine-rich<br>RNA-binding protein | FJ415184 | 10  | 22  | 1467.69 | 1466.68 | 1466.66  | 13  | 0 |  | CFVGGLAWATDD   |               |
|    |                                     |          |     |     |         |         |          |     |   |  | R              |               |



|    |                                      |          |     |     |         |         |          |    |   |                            |               |
|----|--------------------------------------|----------|-----|-----|---------|---------|----------|----|---|----------------------------|---------------|
|    |                                      |          | 39  | 47  | 1073.58 | 1072.57 | 1072.56  | 9  | 1 | IINDRETGR                  |               |
|    |                                      |          | 50  | 57  | 930.5   | 929.5   | 929.48   | 21 | 0 | GFGFVTFR                   |               |
|    |                                      |          | 50  | 60  | 1302.67 | 1301.66 | 1301.64  | 15 | 1 | GFGFVTFRDEK                |               |
|    |                                      |          | 64  | 77  | 1489.69 | 1488.68 | 1488.66  | 13 | 0 | DAIEGMNGQNLD<br>GR         |               |
|    |                                      |          | 64  | 77  | 1505.68 | 1504.67 | 1504.66  | 13 | 0 | DAIEGMNGQNLD<br>GR         | Oxidation (M) |
|    |                                      |          | 78  | 87  | 1131.6  | 1130.59 | 1130.57  | 17 | 0 | NITVNEAQRS                 |               |
|    |                                      |          | 89  | 105 | 1400.63 | 1399.62 | 1399.59  | 21 | 0 | SGGGGGGFGGG<br>NGGYSR      |               |
|    |                                      |          | 116 | 124 | 907.46  | 906.46  | 906.44   | 11 | 1 | QGGYGGGRR                  |               |
|    |                                      |          | 144 | 154 | 1110.52 | 1109.51 | 1109.48  | 27 | 1 | REGGYGDGGSR                |               |
|    |                                      |          | 145 | 154 | 954.4   | 953.4   | 953.38   | 10 | 0 | EGGYGDGGSR                 |               |
|    |                                      |          | 158 | 167 | 990.44  | 989.44  | 989.43   | 0  | 0 | GGGASEGNWR                 |               |
|    |                                      |          | 158 | 168 | 1077.48 | 1076.48 | 1076.46  | 9  | 1 | GGGASEGNWRS                |               |
| 89 | manganese<br>superoxide<br>dismutase | AAC78469 | 26  | 36  | 1418.81 | 1417.81 | 1417.674 | 93 | 0 | HHQTYITNYNK                |               |
|    |                                      |          | 26  | 47  | 2679.56 | 2678.55 | 2678.356 | 73 | 1 | HHQTYITNYNKAL<br>EQLHEAIQK |               |
|    |                                      |          | 37  | 47  | 1279.82 | 1278.81 | 1278.693 | 92 | 0 | ALEQLHEAIQK                |               |
|    |                                      |          | 37  | 55  | 2053.25 | 2052.25 | 2052.085 | 78 | 1 | ALEQLHEAIQKGD<br>SSTVVK    |               |
|    |                                      |          | 56  | 75  | 2240.32 | 2239.32 | 2239.165 | 68 | 1 | LQSAIKFNGGGHV<br>NHSIFWK   |               |
|    |                                      |          | 62  | 75  | 1599.9  | 1598.89 | 1598.774 | 74 | 0 | FNGGGHVNHSIF<br>WK         |               |
|    |                                      |          | 62  | 81  | 2264.3  | 2263.29 | 2263.176 | 52 | 1 | FNGGGHVNHSIF               |               |

|    |                                                 |          |     |     |         |         |          |    |          |                                       |                 |
|----|-------------------------------------------------|----------|-----|-----|---------|---------|----------|----|----------|---------------------------------------|-----------------|
|    |                                                 |          |     |     |         |         |          |    | WKNLAPIR |                                       |                 |
|    |                                                 |          | 76  | 89  | 1434.89 | 1433.89 | 1433.763 | 86 | 1        | NLAPIREGGGEPP<br>K                    |                 |
|    |                                                 |          | 82  | 109 | 2924.73 | 2923.72 | 2923.472 | 85 | 1        | EGGGEPPKASLG<br>WAIDTHFGSLES<br>LIQK  |                 |
|    |                                                 |          | 133 | 148 | 1796.17 | 1795.16 | 1795.009 | 83 | 1        | KLVIETTPNQDPLV<br>TK                  |                 |
|    |                                                 |          | 134 | 148 | 1668.07 | 1667.06 | 1666.914 | 89 | 0        | LVIETTPNQDPLVT<br>K                   |                 |
|    |                                                 |          | 149 | 170 | 2611.48 | 2610.47 | 2610.364 | 41 | 0        | GPHLVPLLGDVW<br>EHAYYLQYK             |                 |
|    |                                                 |          | 149 | 178 | 3597.08 | 3596.07 | 3595.898 | 49 | 1        | GPHLVPLLGDVW<br>EHAYYLQYKNVRP<br>DYLK |                 |
|    |                                                 |          | 171 | 182 | 1545.97 | 1544.96 | 1544.846 | 75 | 1        | NVRPDYLKNIWK                          |                 |
|    |                                                 |          | 179 | 187 | 1200.78 | 1199.77 | 1199.682 | 77 | 1        | NIWKVINWK                             |                 |
|    |                                                 |          | 188 | 198 | 1348.7  | 1347.69 | 1347.565 | 94 | 1        | YASEVYEKECA                           |                 |
| 91 | glyceraldehyde-3-<br>phosphate<br>dehydrogenase | FJ415182 | 6   | 13  | 833.52  | 832.52  | 832.46   | 72 | 0        | IGINGFGR                              |                 |
|    |                                                 |          | 49  | 57  | 1119.61 | 1118.6  | 1118.51  | 80 | 0        | YDSVHGQWK                             |                 |
|    |                                                 |          | 68  | 82  | 1677.06 | 1676.06 | 1675.97  | 53 | 0        | TLLFGEKPVTVFGI<br>R                   |                 |
|    |                                                 |          | 121 | 140 | 2165.19 | 2164.19 | 2164.09  | 46 | 1        | VIISAPSKDAPMFV<br>MGVNEK              | 2 Oxidation (M) |
|    |                                                 |          | 129 | 140 | 1337.72 | 1336.71 | 1336.62  | 74 | 0        | DAPMFVMGVNEK                          |                 |
|    |                                                 |          | 129 | 140 | 1353.72 | 1352.71 | 1352.61  | 73 | 0        | DAPMFVMGVNEK                          | Oxidation (M)   |

|    |                             |          |     |     |         |         |         |    |   |                              |                 |
|----|-----------------------------|----------|-----|-----|---------|---------|---------|----|---|------------------------------|-----------------|
|    |                             |          | 141 | 164 | 2744.42 | 2743.41 | 2743.28 | 47 | 0 | DYKPEYDIISNASC<br>TTNCLAPLAK |                 |
|    |                             |          | 165 | 188 | 2655.51 | 2654.51 | 2654.41 | 37 | 1 | VIHDKFGIIEGLMT<br>TVHSITATQK | Oxidation (M)   |
|    |                             |          | 189 | 199 | 1307.71 | 1306.71 | 1306.6  | 84 | 1 | TVDGPSMKDWR                  | Oxidation (M)   |
|    |                             |          | 203 | 217 | 1434.84 | 1433.83 | 1433.75 | 55 | 0 | AASFNIIPSSTGAA<br>K          |                 |
|    |                             |          | 222 | 236 | 1603.93 | 1602.92 | 1602.89 | 18 | 1 | VLPALNGKLTGMA<br>FR          | Oxidation (M)   |
|    |                             |          | 237 | 250 | 1498.92 | 1497.91 | 1497.84 | 46 | 0 | VPTVDVSVDLTV<br>R            |                 |
|    |                             |          | 274 | 293 | 2159.11 | 2158.1  | 2158.01 | 41 | 0 | GILGYTDEDLVST<br>DFVGDSR     |                 |
|    |                             |          | 301 | 311 | 1147.69 | 1146.68 | 1146.6  | 69 | 0 | AGIALNENFAK                  |                 |
|    |                             |          | 312 | 325 | 1775.9  | 1774.89 | 1774.8  | 50 | 0 | LVSWYDNEWGYS<br>TR           |                 |
| 92 | isocitrate<br>dehydrogenase | FJ415198 | 8   | 22  | 1676.78 | 1675.78 | 1675.75 | 11 | 0 | VANPIVEMDGDE<br>MTR          |                 |
|    |                             |          | 8   | 22  | 1692.78 | 1691.77 | 1691.75 | 11 | 0 | VANPIVEMDGDE<br>MTR          | Oxidation (M)   |
|    |                             |          | 8   | 22  | 1708.77 | 1707.76 | 1707.74 | 11 | 0 | VANPIVEMDGDE<br>MTR          | 2 Oxidation (M) |
|    |                             |          | 32  | 42  | 1299.82 | 1298.81 | 1298.78 | 23 | 0 | LILPFVELDIK                  |                 |
|    |                             |          | 43  | 51  | 1117.6  | 1116.59 | 1116.57 | 17 | 0 | YFDLGLPHR                    |                 |
|    |                             |          | 52  | 68  | 1806.92 | 1805.91 | 1805.89 | 11 | 1 | DATDDKVITIESAE<br>ATLK       |                 |
|    |                             |          | 103 | 111 | 1033.59 | 1032.59 | 1032.57 | 19 | 0 | NILNGTVFR                    |                 |
|    |                             |          | 103 | 117 | 1773.98 | 1772.98 | 1772.96 | 11 | 1 | NILNGTVFREPIIC               |                 |

|     |     |         |         |         |     |   |                                |               |  |
|-----|-----|---------|---------|---------|-----|---|--------------------------------|---------------|--|
|     |     |         |         |         |     |   |                                | K             |  |
| 135 | 142 | 993.47  | 992.46  | 992.45  | 10  | 0 | HAFGDQYR                       |               |  |
| 156 | 166 | 1202.66 | 1201.65 | 1201.63 | 16  | 0 | LVFVPEGQGEK                    |               |  |
| 167 | 192 | 2945.4  | 2944.39 | 2944.31 | 30  | 0 | TEYEVFNFTGEGG<br>VSLAMYNTDESIR | Oxidation (M) |  |
| 193 | 205 | 1431.68 | 1430.67 | 1430.65 | 13  | 0 | AFAEASMNTAYQ<br>K              |               |  |
| 207 | 214 | 1007.57 | 1006.56 | 1006.55 | 9   | 0 | WPLYLSTK                       |               |  |
| 225 | 238 | 1816.92 | 1815.91 | 1815.88 | 16  | 1 | FKDIFQEVYEANW<br>K             |               |  |
| 227 | 238 | 1541.78 | 1540.77 | 1540.72 | 32  | 0 | DIFQEVYEANWK                   |               |  |
| 239 | 251 | 1609.8  | 1608.8  | 1608.77 | 18  | 1 | SKYEAAGIWYEHR                  |               |  |
| 241 | 251 | 1394.68 | 1393.67 | 1393.64 | 21  | 0 | YEAAGIWYEHR                    |               |  |
| 252 | 262 | 1251.69 | 1250.68 | 1250.66 | 15  | 0 | LIDDMVAYALK                    |               |  |
| 252 | 262 | 1267.69 | 1266.68 | 1266.65 | 23  | 0 | LIDDMVAYALK                    | Oxidation (M) |  |
| 263 | 272 | 1156.53 | 1155.52 | 1155.5  | 17  | 0 | SEGGYVWACK                     |               |  |
| 304 | 316 | 1355.72 | 1354.71 | 1354.68 | 22  | 0 | TIEAEEAHGTVTR                  |               |  |
| 324 | 340 | 1797.91 | 1796.9  | 1796.87 | 16  | 0 | GGETSTNSIASIFA<br>WTR          |               |  |
| 354 | 360 | 877.52  | 876.51  | 876.5   | 22  | 0 | LLDFIEK                        |               |  |
| 354 | 373 | 2207.2  | 2206.2  | 2206.16 | 18  | 1 | LLDFIEKLEAACIA<br>TVESGK       |               |  |
| 374 | 386 | 1426.67 | 1425.67 | 1425.8  | -91 | 1 | MTKDLALIIHGSK                  |               |  |
| 377 | 386 | 1066.65 | 1065.64 | 1065.62 | 28  | 0 | DLALIIHGSK                     |               |  |
| 390 | 407 | 2055.08 | 2054.07 | 2054.02 | 24  | 1 | DKYLNTEEFIDAV<br>AADLK         |               |  |
| 392 | 407 | 1811.93 | 1810.92 | 1810.9  | 11  | 0 | YLNTEEFIDAVAA<br>DLK           |               |  |

|    |                             |          |     |     |         |         |         |     |   |                                |               |
|----|-----------------------------|----------|-----|-----|---------|---------|---------|-----|---|--------------------------------|---------------|
| 93 | isocitrate<br>dehydrogenase | FJ415198 | 8   | 22  | 1676.79 | 1675.78 | 1675.75 | 17  | 0 | VANPIVEMDGDE<br>MTR            | Oxidation (M) |
|    |                             |          | 8   | 22  | 1692.79 | 1691.78 | 1691.75 | 17  | 0 | VANPIVEMDGDE<br>MTR            |               |
|    |                             |          | 32  | 42  | 1299.83 | 1298.83 | 1298.78 | 30  | 0 | LILPFVELDIK                    |               |
|    |                             |          | 43  | 51  | 1117.62 | 1116.61 | 1116.57 | 35  | 0 | YFDLGLPHR                      |               |
|    |                             |          | 52  | 68  | 1806.92 | 1805.92 | 1805.89 | 16  | 1 | DATDDKVTIESAE<br>ATLK          |               |
|    |                             |          | 58  | 74  | 1849.89 | 1848.88 | 1849.02 | -75 | 1 | VTIESAEATLKYNV<br>AIK          |               |
|    |                             |          | 96  | 111 | 1758.96 | 1757.95 | 1757.95 | 0   | 1 | SPNGTIRNILNGTV<br>FR           |               |
|    |                             |          | 103 | 111 | 1033.62 | 1032.62 | 1032.57 | 38  | 0 | NILNGTVFR                      |               |
|    |                             |          | 118 | 134 | 1935.07 | 1934.06 | 1934.06 | 5   | 0 | NVPQLVPGWTKPI<br>CIGR          |               |
|    |                             |          | 135 | 142 | 993.5   | 992.49  | 992.45  | 40  | 0 | HAFGDQYR                       |               |
|    |                             |          | 156 | 166 | 1202.67 | 1201.67 | 1201.63 | 24  | 0 | LVFVPEGQGEK                    |               |
|    |                             |          | 167 | 192 | 2929.28 | 2928.27 | 2928.31 | -13 | 0 | TEYEVFNFTGEGG<br>VSLAMYNTDESIR |               |
|    |                             |          | 167 | 192 | 2945.29 | 2944.28 | 2944.31 | -10 | 0 | TEYEVFNFTGEGG<br>VSLAMYNTDESIR | Oxidation (M) |
|    |                             |          | 207 | 214 | 1007.59 | 1006.58 | 1006.55 | 39  | 0 | WPLYLSTK                       |               |
|    |                             |          | 227 | 238 | 1541.77 | 1540.76 | 1540.72 | 25  | 0 | DIFQEVYEANWK                   |               |
|    |                             |          | 239 | 251 | 1609.82 | 1608.81 | 1608.77 | 24  | 1 | SKYEAAGIWYEHR                  |               |
|    |                             |          | 241 | 251 | 1394.69 | 1393.68 | 1393.64 | 28  | 0 | YEAAGIWYEHR                    |               |
|    |                             |          | 263 | 272 | 1156.55 | 1155.55 | 1155.5  | 34  | 0 | SEGGYVWACK                     |               |
|    |                             |          | 304 | 316 | 1355.72 | 1354.72 | 1354.68 | 22  | 0 | TIEAEEAHGTVTR                  |               |
|    |                             |          | 324 | 340 | 1797.89 | 1796.89 | 1796.87 | 11  | 0 | GGETSTNSIASIFA                 |               |

|    |                                                   |          |     |     |         |         |         |     |   |                               | WTR |               |
|----|---------------------------------------------------|----------|-----|-----|---------|---------|---------|-----|---|-------------------------------|-----|---------------|
|    |                                                   |          | 374 | 386 | 1426.68 | 1425.67 | 1425.8  | -91 | 1 | MTKDLALIIHGSK                 |     |               |
|    |                                                   |          | 377 | 386 | 1066.67 | 1065.67 | 1065.62 | 46  | 0 | DLALIIHGSK                    |     |               |
|    |                                                   |          | 392 | 407 | 1811.94 | 1810.93 | 1810.9  | 16  | 0 | YLNTEEFIDAVAA<br>DLK          |     |               |
| 94 | eukaryotic<br>translation initiation<br>factor 5A | GU295062 | 19  | 29  | 1262.77 | 1261.76 | 1261.68 | 63  | 1 | TYPQQAGTIRK                   |     |               |
|    |                                                   |          | 42  | 52  | 1134.65 | 1133.64 | 1133.63 | 8   | 1 | VVEVSTSKTGK                   |     |               |
|    |                                                   |          | 58  | 69  | 1407.83 | 1406.82 | 1406.7  | 85  | 0 | CHFVGIDIFTAK                  |     |               |
|    |                                                   |          | 58  | 70  | 1535.91 | 1534.9  | 1534.8  | 65  | 1 | CHFVGIDIFTAKK                 |     |               |
|    |                                                   |          | 70  | 88  | 2216.21 | 2215.2  | 2215.08 | 54  | 1 | KLEDIVPSSHNC<br>VPHVNR        |     |               |
|    |                                                   |          | 71  | 88  | 2088.08 | 2087.07 | 2086.99 | 43  | 0 | LEDIVPSSHNC<br>PHVNR          |     |               |
|    |                                                   |          | 129 | 154 | 2816.47 | 2815.46 | 2815.31 | 56  | 1 | DGFAEGKDLVSV<br>MSAMGEEQICALK | 2   | Oxidation (M) |
|    |                                                   |          | 136 | 154 | 2112.09 | 2111.09 | 2110.99 | 42  | 0 | DLVSVMSAMGE<br>EQICALK        | 2   | Oxidation (M) |
|    |                                                   |          | 136 | 159 | 2622.4  | 2621.39 | 2621.27 | 41  | 1 | DLVSVMSAMGE<br>EQICALKDIGPK   | 2   | Oxidation (M) |
| 95 | chalcone isomerase                                | GU295063 | 42  | 61  | 2314.26 | 2313.25 | 2313.22 | 12  | 0 | FTAIGVYLEPEVV<br>GHLQQWK      |     |               |
|    |                                                   |          | 62  | 85  | 2588.33 | 2587.32 | 2587.28 | 15  | 0 | GKPGNVLAEDDD<br>FFEALINAPVEK  |     |               |
|    |                                                   |          | 94  | 109 | 1763.98 | 1762.97 | 1762.92 | 28  | 1 | EIKGSQYGVQLES<br>AVR          |     |               |
|    |                                                   |          | 97  | 109 | 1393.76 | 1392.75 | 1392.7  | 35  | 0 | GSQYGVQLESAV                  |     |               |

|    |                              |          |     |     |         |         |         |     |   |                            |
|----|------------------------------|----------|-----|-----|---------|---------|---------|-----|---|----------------------------|
|    |                              |          |     |     |         |         |         |     | R |                            |
|    |                              |          | 97  | 111 | 1664.89 | 1663.88 | 1663.83 | 30  | 1 | GSQYGVQLESAV<br>RDR        |
|    |                              |          | 112 | 128 | 2010.93 | 2009.92 | 2009.9  | 14  | 1 | LAADDKYEEEEEE<br>ALEK      |
|    |                              |          | 129 | 136 | 983.51  | 982.51  | 982.51  | 0   | 0 | VVEFFQSK<br>DSVITYHFPANSA  |
|    |                              |          | 141 | 168 | 3027.52 | 3026.51 | 3026.45 | 19  | 1 | TAEIAFTTEGKEEA<br>K        |
|    |                              |          | 183 | 189 | 852.41  | 851.4   | 851.43  | -35 | 0 | WYLGGR                     |
|    |                              |          | 190 | 209 | 2023.07 | 2022.06 | 2022.03 | 14  | 0 | GVSATTISLANL<br>SAELCK     |
| 96 | Triosephosphate<br>isomerase | GU295064 | 44  | 57  | 1433.76 | 1432.75 | 1432.73 | 13  | 1 | KPCRAVTAMAGS<br>GK         |
|    |                              |          | 66  | 75  | 1123.59 | 1122.58 | 1122.53 | 44  | 1 | CNGTKDSITK                 |
|    |                              |          | 123 | 136 | 1435.78 | 1434.77 | 1434.74 | 20  | 0 | GGAFTGEISVEQL<br>K         |
|    |                              |          | 123 | 141 | 2009.05 | 2008.04 | 2007.99 | 24  | 1 | GGAFTGEISVEQL<br>KDIGCK    |
|    |                              |          | 142 | 150 | 1096.63 | 1095.62 | 1095.58 | 36  | 0 | WVILGHSER                  |
|    |                              |          | 142 | 151 | 1252.74 | 1251.73 | 1251.68 | 39  | 1 | WVILGHSERR                 |
|    |                              |          | 152 | 163 | 1371.73 | 1370.72 | 1370.68 | 29  | 0 | HIIGEDDQFIGK               |
|    |                              |          | 152 | 164 | 1499.83 | 1498.82 | 1498.78 | 26  | 1 | HIIGEDDQFIGKK              |
|    |                              |          | 165 | 186 | 2361.22 | 2360.21 | 2360.2  | 4   | 0 | AAYALNEGLGVIA<br>CIGELLEER |
|    |                              |          | 187 | 197 | 1329.67 | 1328.66 | 1328.62 | 30  | 1 | EAGKTFDVCFR                |
|    |                              |          | 191 | 197 | 944.43  | 943.42  | 943.42  | 0   | 0 | TFDVCFR                    |
|    |                              |          | 227 | 245 | 2156.09 | 2155.08 | 2155.12 | -18 | 0 | VATPQQAQEVHV               |

|    |                              |          |     |         |         |         |         |    |                                           |                      |  |
|----|------------------------------|----------|-----|---------|---------|---------|---------|----|-------------------------------------------|----------------------|--|
|    |                              |          |     |         |         |         |         |    | AVHDWLK                                   |                      |  |
|    |                              | 258      | 274 | 1752.88 | 1751.88 | 1751.85 | 17      | 0  | IYGGSVNGSNCA<br>ELAK                      |                      |  |
|    |                              | 258      | 289 | 3282.57 | 3281.56 | 3281.62 | -18     | 1  | IYGGSVNGSNCA<br>ELAKQEDIDGFLV<br>GGASLK   |                      |  |
|    |                              | 290      | 303 | 1449.81 | 1448.8  | 1448.75 | 34      | 0  | GPEFATIVNSVTS<br>K                        |                      |  |
|    |                              | 290      | 304 | 1577.79 | 1576.78 | 1576.85 | -38     | 1  | GPEFATIVNSVTS<br>KK                       |                      |  |
| 97 | thiazole biosynthetic enzyme | GU295068 | 2   | 17      | 1682.87 | 1681.86 | 1681.87 | -5 | 1                                         | ASSIATTLTSSSKL<br>CR |  |
|    |                              | 66       | 76  | 1290.72 | 1289.71 | 1289.7  | 7       | 1  | FDPIKESIVSR<br>RYMMDMITYADT               |                      |  |
|    |                              | 81       | 112 | 3521.72 | 3520.72 | 3520.59 | 36      | 1  | DVVVVGAGSAGL<br>SCAYELSK<br>YMMDMITYADTDV | 3 Oxidation (M)      |  |
|    |                              | 82       | 112 | 3365.56 | 3364.55 | 3364.49 | 17      | 0  | VVVGAGSAGLSC<br>AYELSK                    | 3 Oxidation (M)      |  |
|    |                              | 150      | 168 | 2317.12 | 2316.11 | 2316.1  | 4       | 0  | FLDELAIEYDEQD<br>DYVVIK                   |                      |  |
|    |                              | 169      | 180 | 1322.7  | 1321.69 | 1321.67 | 15      | 0  | HAALFTSTIMSK                              | Oxidation (M)        |  |
|    |                              | 181      | 188 | 910.56  | 909.55  | 909.58  | -32     | 0  | LLARPNVK                                  |                      |  |
|    |                              | 189      | 201 | 1402.81 | 1401.8  | 1401.79 | 14      | 0  | LFNAVAAEDLIVK                             |                      |  |
|    |                              | 189      | 204 | 1744.97 | 1743.96 | 1743.95 | 5       | 1  | LFNAVAAEDLIVKE<br>GR                      |                      |  |
|    |                              | 234      | 251 | 1773.9  | 1772.89 | 1772.85 | 22      | 0  | VVSSCGHDGPF<br>GATGVK                     |                      |  |



|    |               |          |     |     |         |         |         |     |   |                                           |                 |
|----|---------------|----------|-----|-----|---------|---------|---------|-----|---|-------------------------------------------|-----------------|
|    |               |          | 234 | 252 | 1929.98 | 1928.97 | 1928.95 | 10  | 1 | VVSSCGHDGPF<br>GATGVKR                    |                 |
|    |               |          | 253 | 266 | 1475.79 | 1474.78 | 1474.79 | -6  | 1 | LKSIGMIDSVPGM<br>K                        |                 |
|    |               |          | 267 | 279 | 1434.73 | 1433.72 | 1433.68 | 27  | 0 | ALDMNTAEDAIVR                             | Oxidation (M)   |
|    |               |          | 283 | 303 | 2216.08 | 2215.07 | 2215.09 | -4  | 0 | EIVPGMIVTGMEV<br>AEIDGSPR                 | Oxidation (M)   |
|    |               |          | 283 | 303 | 2232.09 | 2231.08 | 2231.08 | 0   | 0 | EIVPGMIVTGMEV<br>AEIDGSPR                 | 2 Oxidation (M) |
|    |               |          | 304 | 317 | 1503.7  | 1502.69 | 1502.66 | 19  | 0 | MGPTFGAMMISG<br>QK                        | 3 Oxidation (M) |
|    |               |          | 325 | 357 | 3252.68 | 3251.67 | 3251.62 | 15  | 0 | SLGLPNAIDGTYV<br>GSIHPELILAAADS<br>AETADA |                 |
| 98 | transaldolase | GU295065 | 109 | 129 | 2305.08 | 2304.07 | 2304.04 | 17  | 0 | NAVDMALADSTC<br>SPLDNPELR                 | Oxidation (M)   |
|    |               |          | 161 | 170 | 1158.65 | 1157.65 | 1157.62 | 25  | 0 | LAYDTHGIIR                                |                 |
|    |               |          | 161 | 171 | 1314.78 | 1313.77 | 1313.72 | 38  | 1 | LAYDTHGIIRR                               |                 |
|    |               |          | 171 | 177 | 908.53  | 907.52  | 907.54  | -11 | 1 | RVHDLLR                                   |                 |
|    |               |          | 178 | 188 | 1301.72 | 1300.71 | 1300.67 | 38  | 0 | LYDEIAVPPER                               |                 |
|    |               |          | 193 | 204 | 1344.72 | 1343.72 | 1343.68 | 22  | 0 | IPSTWQGIEASR                              |                 |
|    |               |          | 248 | 261 | 1509.78 | 1508.77 | 1508.72 | 33  | 0 | SHSGDPEIEAAIQ<br>R                        |                 |
|    |               |          | 296 | 311 | 1777.07 | 1776.06 | 1776.01 | 28  | 0 | DIFSLGVDYIIAPL<br>K                       |                 |
|    |               |          | 341 | 350 | 1216.61 | 1215.61 | 1215.57 | 32  | 0 | YDFTAEELTK                                |                 |
|    |               |          | 351 | 380 | 3091.55 | 3090.54 | 3090.53 | 3   | 0 | WDQLSLASAMGP<br>ASVELLAAGLDGY             | Oxidation (M)   |

|     |                                         |          |     |     |         |         |         |     |   |                 |
|-----|-----------------------------------------|----------|-----|-----|---------|---------|---------|-----|---|-----------------|
|     |                                         |          |     |     |         |         |         |     |   | VNQAK           |
| 100 | transaldolase                           | GU295065 | 2   | 19  | 1862.1  | 1861.09 | 1861.02 | 37  | 1 | SVTLKSPSSFLS    |
|     |                                         |          |     |     |         |         |         |     |   | SSLPK           |
|     |                                         |          | 161 | 170 | 1158.67 | 1157.66 | 1157.62 | 34  | 0 | LAYDTHGIIR      |
|     |                                         |          | 161 | 171 | 1314.79 | 1313.78 | 1313.72 | 45  | 1 | LAYDTHGIIRR     |
|     |                                         |          | 171 | 177 | 908.53  | 907.52  | 907.54  | -11 | 1 | RVHDLLR         |
|     |                                         |          | 178 | 188 | 1301.74 | 1300.73 | 1300.67 | 53  | 0 | LYDEIAVPPER     |
|     |                                         |          | 189 | 204 | 1846.11 | 1845.1  | 1845.01 | 48  | 1 | LLFKIPSTWQGIEA  |
|     |                                         |          |     |     |         |         |         |     |   | SR              |
|     |                                         |          | 193 | 204 | 1344.74 | 1343.73 | 1343.68 | 37  | 0 | IPSTWQGIEASR    |
|     |                                         |          | 248 | 261 | 1509.8  | 1508.79 | 1508.72 | 46  | 0 | SHSGDPEIEAAIQ   |
|     |                                         |          |     |     |         |         |         |     |   | R               |
|     |                                         |          | 296 | 311 | 1777.06 | 1776.05 | 1776.01 | 28  | 0 | DIFSLLGVDYIIAPL |
|     |                                         |          |     |     |         |         |         |     |   | K               |
|     |                                         |          | 327 | 332 | 859.4   | 858.39  | 858.4   | -11 | 1 | YSYDRR          |
|     |                                         |          | 332 | 340 | 985.57  | 984.56  | 984.55  | 20  | 1 | RLSPQSAAR       |
|     |                                         |          | 341 | 350 | 1216.66 | 1215.65 | 1215.57 | 74  | 0 | YDFTAEELTK      |
| 99  | U2 small nuclear<br>ribonucleoprotein A | GU295066 | 2   | 11  | 1186.74 | 1185.73 | 1185.71 | 16  | 1 | VKLTADLIWK      |
|     |                                         |          | 12  | 20  | 1133.59 | 1132.58 | 1132.55 | 26  | 0 | CPHFFNALK       |
|     |                                         |          | 12  | 22  | 1418.78 | 1417.77 | 1417.69 | 56  | 1 | CPHFFNALKER     |
|     |                                         |          | 31  | 56  | 2862.47 | 2861.46 | 2861.42 | 13  | 0 | IAVIENLGATEDQF  |
|     |                                         |          |     |     |         |         |         |     |   | DTIDLSDNEIVK    |
|     |                                         |          | 57  | 64  | 1009.55 | 1008.54 | 1008.53 | 9   | 0 | LDNFPYLK        |
|     |                                         |          | 57  | 65  | 1165.66 | 1164.65 | 1164.63 | 17  | 1 | LDNFPYLKR       |
|     |                                         |          | 65  | 75  | 1283.8  | 1282.79 | 1282.75 | 38  | 1 | RLGTLINNNR      |
|     |                                         |          | 66  | 75  | 1127.69 | 1126.68 | 1126.65 | 35  | 0 | LGTLLINNNR      |
|     |                                         |          | 79  | 99  | 2389.34 | 2388.33 | 2388.29 | 16  | 0 | INPNIGEFLPNLHT  |

|     |                   |          |     |     |         |         |          |     |   | LVLTNNR        |                 |  |
|-----|-------------------|----------|-----|-----|---------|---------|----------|-----|---|----------------|-----------------|--|
|     |                   |          |     |     |         |         |          |     |   | LVNLVEIDPLSSLP |                 |  |
|     |                   |          |     |     |         |         |          |     |   | K              |                 |  |
|     |                   |          | 100 | 114 | 1637    | 1635.99 | 1635.94  | 30  | 0 |                |                 |  |
|     |                   |          | 115 | 127 | 1518.9  | 1517.89 | 1517.85  | 32  | 0 | LQFLSLLDNNITK  |                 |  |
|     |                   |          | 154 | 165 | 1406.77 | 1405.76 | 1405.72  | 28  | 1 | ERLEAENLFASK   |                 |  |
|     |                   |          | 156 | 165 | 1121.59 | 1120.58 | 1120.58  | 8   | 0 | LEAENLFASK     |                 |  |
|     |                   |          | 183 | 198 | 1830.88 | 1829.87 | 1829.84  | 21  | 0 | EVPNVSEVAEEEEQ | Oxidation (M)   |  |
|     |                   |          |     |     |         |         |          |     |   | MPK            |                 |  |
|     |                   |          | 199 | 211 | 1378.87 | 1377.86 | 1377.82  | 29  | 0 | VVAPTPEQILAIAK |                 |  |
|     |                   |          | 212 | 225 | 1500.84 | 1499.83 | 1499.79  | 26  | 0 | AAIVNSQTLEEVA  |                 |  |
|     |                   |          |     |     |         |         |          |     |   | R              |                 |  |
|     |                   |          | 212 | 228 | 1871.06 | 1870.05 | 1870.02  | 21  | 1 | AAIVNSQTLEEVA  |                 |  |
|     |                   |          |     |     |         |         |          |     |   | RLEK           |                 |  |
|     |                   |          | 229 | 250 | 2237.2  | 2236.19 | 2236.17  | 8   | 1 | ALQTGQLPADLKI  |                 |  |
|     |                   |          |     |     |         |         |          |     |   | PGDDTNAAK      |                 |  |
|     |                   |          |     |     |         |         |          |     |   | YMYLTEEILKENP  |                 |  |
| 101 | chalcone synthase | ABS52573 | 69  | 94  | 3181.52 | 3180.51 | 3180.445 | 21  | 1 | NVCEYMAPSLDA   | 2 Oxidation (M) |  |
|     |                   |          |     |     |         |         |          |     |   | R              |                 |  |
|     |                   |          | 124 | 146 | 2570.27 | 2569.26 | 2569.219 | 15  | 0 | ITHLVFCTTSGVD  | Oxidation (M)   |  |
|     |                   |          |     |     |         |         |          |     |   | MPGADYQLTK     |                 |  |
|     |                   |          | 147 | 155 | 982.617 | 981.61  | 981.6335 | -24 | 0 | LLGLRPSVK      |                 |  |
|     |                   |          | 156 | 172 | 2019.96 | 2018.95 | 2018.949 | 1   | 1 | RLMMYQQGCFAG   | 2 Oxidation (M) |  |
|     |                   |          |     |     |         |         |          |     |   | GTVLR          |                 |  |
|     |                   |          | 157 | 172 | 1863.88 | 1862.88 | 1862.848 | 15  | 0 | LMMYQQGCFAGG   | 2 Oxidation (M) |  |
|     |                   |          |     |     |         |         |          |     |   | TVLR           |                 |  |
|     |                   |          | 176 | 185 | 1087.55 | 1086.54 | 1086.542 | -1  | 1 | DLAENKNGAR     |                 |  |
|     |                   |          | 186 | 199 | 1593.9  | 1592.89 | 1592.86  | 21  | 0 | VLVVCSEITAVTFR |                 |  |
|     |                   |          | 260 | 269 | 1156.68 | 1155.67 | 1155.665 | 6   | 0 | EVGLTFHLLK     |                 |  |

|     |                             |          |         |          |         |         |                        |               |   |                               |                 |
|-----|-----------------------------|----------|---------|----------|---------|---------|------------------------|---------------|---|-------------------------------|-----------------|
| 102 | protein disulfide isomerase | ABO41843 | 260     | 277      | 1966.14 | 1965.13 | 1965.13                | -1            | 1 | EVGLTFHLLKDVP<br>GLISK        |                 |
|     |                             |          | 329     | 350      | 2587.24 | 2586.24 | 2586.192               | 17            | 0 | HVLSEYGNMSSA<br>CVLFILDEMRR   | Oxidation (M)   |
|     |                             |          | 329     | 350      | 2603.2  | 2602.19 | 2602.187               | 2             | 0 | HVLSEYGNMSSA<br>CVLFILDEMRR   | 2 Oxidation (M) |
|     |                             |          | 48      | 64       | 2179.04 | 2178.03 | 2177.982               | 22            | 0 | HDFIVLEFYAPWC<br>GHCK         |                 |
|     |                             |          | 65      | 72       | 986.49  | 985.483 | 985.4869               | -4            | 0 | HLAPEYEK                      |                 |
|     |                             |          | 80      | 88       | 1037.58 | 1036.58 | 1036.571               | 6             | 0 | HDPPIFLAK                     |                 |
|     |                             |          | 89      | 106      | 1995.97 | 1994.96 | 1994.907               | 26            | 1 | VDADDEANKDLAS<br>QYDVK        |                 |
|     |                             |          | 129     | 138      | 1136.61 | 1135.6  | 1135.576               | 22            | 0 | EADGIVEYLK                    |                 |
|     |                             |          | 129     | 139      | 1264.69 | 1263.68 | 1263.671               | 6             | 1 | EADGIVEYLKK                   |                 |
|     |                             |          | 150     | 162      | 1461.77 | 1460.77 | 1460.736               | 21            | 1 | LTEDASNLIDDKK                 |                 |
|     |                             |          | 172     | 186      | 1753.81 | 1752.8  | 1752.755               | 24            | 0 | FSGEEFESYMALA<br>EK           | Oxidation (M)   |
|     |                             |          | 187     | 200      | 1637.84 | 1636.83 | 1636.785               | 31            | 1 | LRSDYDFGHTLDA<br>K            |                 |
|     |                             |          | 189     | 200      | 1368.64 | 1367.63 | 1367.599               | 26            | 0 | SDYDFGHTLDAK                  |                 |
|     |                             |          | 205     | 215      | 1099.63 | 1098.62 | 1098.603               | 13            | 0 | GESSVVGPLVR                   |                 |
|     |                             |          | 216     | 228      | 1596.91 | 1595.9  | 1595.86                | 25            | 0 | LFKPFDELVVDFK                 |                 |
|     |                             |          | 229     | 237      | 1076.58 | 1075.57 | 1075.555               | 13            | 0 | DFKPEALEK                     |                 |
|     |                             |          | 238     | 262      | 2815.45 | 2814.45 | 2814.423               | 8             | 0 | FIEESSIPLVTLFN<br>NDPSNHPFVAK |                 |
| 271 | 288                         | 1961.01  | 1960    | 1959.95  | 24      | 0       | AMLFADLSTEGFD<br>SLLSK | Oxidation (M) |   |                               |                 |
| 289 | 297                         | 1185.61  | 1184.61 | 1184.583 | 20      | 1       | YREVAEQYK              |               |   |                               |                 |

|     |                               |          |     |     |         |         |          |     |   |                                 |               |
|-----|-------------------------------|----------|-----|-----|---------|---------|----------|-----|---|---------------------------------|---------------|
|     |                               |          | 379 | 391 | 1480.81 | 1479.8  | 1479.764 | 27  | 0 | VVVADTLQDMVFK                   | Oxidation (M) |
|     |                               |          | 395 | 409 | 1893.91 | 1892.9  | 1892.87  | 16  | 0 | NVLEFYAPWCG<br>HCK              |               |
|     |                               |          | 410 | 424 | 1724.99 | 1723.98 | 1723.951 | 16  | 1 | KLAPILDEVAVHYE<br>K             |               |
|     |                               |          | 433 | 448 | 1870.88 | 1869.87 | 1869.838 | 19  | 0 | FDATSNLDILDEF<br>DVR            |               |
|     |                               |          | 449 | 456 | 1002.51 | 1001.5  | 1001.497 | 7   | 0 | GYPTVYFR                        |               |
|     |                               |          | 457 | 471 | 1605.78 | 1604.77 | 1604.827 | -33 | 1 | SANGNITPYLGNR<br>TK             |               |
|     |                               |          | 470 | 479 | 1207.69 | 1206.69 | 1206.65  | 30  | 1 | TKEDIVDFIK                      |               |
|     |                               |          | 483 | 495 | 1537.82 | 1536.81 | 1536.778 | 24  | 1 | DKPVHQESLKDEL                   |               |
| 103 | RNA helicase -like<br>protein | GU295067 | 73  | 83  | 1306.67 | 1305.66 | 1305.61  | 38  | 0 | FLDEPEDSNIK                     |               |
|     |                               |          | 84  | 109 | 2828.48 | 2827.47 | 2827.42  | 21  | 0 | AVTAGETPYTSAF<br>TFEELNLSPELLK  |               |
|     |                               |          | 123 | 149 | 2851.59 | 2850.58 | 2850.54  | 14  | 0 | IQAISLPMILTPPHL<br>DLIAQAHNGSGK | Oxidation (M) |
|     |                               |          | 150 | 160 | 1302.68 | 1301.67 | 1301.61  | 46  | 0 | TTCFTLGMLSR                     | Oxidation (M) |
|     |                               |          | 161 | 177 | 1953.07 | 1952.06 | 1952     | 35  | 1 | VDPNLKAPQALCI<br>CPTR           |               |
|     |                               |          | 178 | 189 | 1425.91 | 1424.9  | 1424.84  | 49  | 1 | EIAIQNLEVLRK<br>RAPIIAQVVIGTPG  |               |
|     |                               |          | 215 | 231 | 1734.12 | 1733.11 | 1733.06  | 34  | 1 | TIK                             |               |
|     |                               |          | 333 | 339 | 842.48  | 841.47  | 841.54   | -83 | 1 | VLVIKDR                         |               |
|     |                               |          | 340 | 346 | 863.43  | 862.42  | 862.45   | -34 | 0 | ILEFGER                         |               |
|     |                               |          | 340 | 355 | 1891.13 | 1890.12 | 1890.07  | 26  | 1 | ILEFGERLGQTIIFV<br>R            |               |

|     |                                       |          |     |     |         |         |          |     |   |                                        |                 |
|-----|---------------------------------------|----------|-----|-----|---------|---------|----------|-----|---|----------------------------------------|-----------------|
|     |                                       |          | 347 | 355 | 1046.66 | 1045.65 | 1045.63  | 19  | 0 | LGQTIIFVR                              |                 |
|     |                                       |          | 366 | 386 | 2295.21 | 2294.2  | 2294.15  | 21  | 0 | ALVEFGYDVTTIQ<br>GALNQAER              |                 |
|     |                                       |          | 366 | 388 | 2538.27 | 2537.26 | 2537.28  | -3  | 1 | ALVEFGYDVTTIQ<br>GALNQAERDK            |                 |
|     |                                       |          | 392 | 409 | 2019.16 | 2018.15 | 2018.1   | 24  | 1 | EFKDGLTQVLIST<br>DLLAR                 |                 |
|     |                                       |          | 395 | 409 | 1614.98 | 1613.97 | 1613.9   | 43  | 0 | DGLTQVLISTDLLA<br>R                    |                 |
|     |                                       |          | 410 | 427 | 2090.15 | 2089.14 | 2089.08  | 28  | 0 | GFDQQQVNLVINY<br>DLPVK                 |                 |
|     |                                       |          | 428 | 442 | 1938.94 | 1937.93 | 1937.88  | 25  | 1 | HDNRVEPDCEVY<br>LHR                    |                 |
| 104 | Betaine-<br>aldehyde<br>dehydrogenase | AAR23816 | 9   | 17  | 1163.61 | 1162.6  | 1162.577 | 22  | 0 | QLFIDGEWR                              |                 |
|     |                                       |          | 9   | 22  | 1743.99 | 1742.98 | 1742.936 | 28  | 1 | QLFIDGEWREPIL<br>K<br>LPTINPATEEIIIGNI |                 |
|     |                                       |          | 25  | 56  | 3286.8  | 3285.8  | 3285.757 | 12  | 1 | PAATAEDVELAVA<br>AARR                  |                 |
|     |                                       |          | 63  | 74  | 1228.68 | 1227.68 | 1227.636 | 33  | 1 | GKDWATAPGAVR                           |                 |
|     |                                       |          | 65  | 74  | 1043.54 | 1042.53 | 1042.52  | 13  | 0 | DWATAPGAVR                             |                 |
|     |                                       |          | 132 | 144 | 1475.79 | 1474.78 | 1474.785 | -5  | 1 | QKAPVSLPMETFK                          |                 |
|     |                                       |          | 246 | 264 | 1929.91 | 1928.91 | 1929.043 | -71 | 0 | IMAAAAQMVKPVVS<br>LELGGK               | Oxidation (M)   |
|     |                                       |          | 246 | 264 | 1946.07 | 1945.06 | 1945.038 | 13  | 0 | IMAAAAQMVKPVVS<br>LELGGK               | 2 Oxidation (M) |

|     |     |         |         |          |    |   |                           |               |
|-----|-----|---------|---------|----------|----|---|---------------------------|---------------|
| 265 | 277 | 1489.83 | 1488.82 | 1488.771 | 35 | 0 | SPIIVFEDVDLKD             |               |
| 300 | 308 | 1064.64 | 1063.63 | 1063.614 | 18 | 0 | LIVHENIAR                 |               |
| 323 | 332 | 1209.55 | 1208.54 | 1208.513 | 23 | 0 | ISDPFEEGCR                |               |
| 333 | 344 | 1233.69 | 1232.68 | 1232.64  | 34 | 0 | LGPVVSGGQYEK              |               |
| 354 | 370 | 1751    | 1749.99 | 1749.937 | 31 | 0 | SEGATILSGGVRP<br>EHLK     |               |
| 371 | 391 | 2485.3  | 2484.29 | 2484.272 | 8  | 1 | KGFFVEPTIITDVT<br>TSMQIWR | Oxidation (M) |
| 372 | 391 | 2341.2  | 2340.19 | 2340.182 | 4  | 0 | GFFVEPTIITDVTT<br>SMQIWR  |               |
| 372 | 391 | 2357.24 | 2356.23 | 2356.177 | 22 | 0 | GFFVEPTIITDVTT<br>SMQIWR  | Oxidation (M) |
| 392 | 402 | 1276.7  | 1275.69 | 1275.653 | 32 | 0 | EEVFGPVLCVK               |               |
| 470 | 483 | 1622.85 | 1621.84 | 1621.799 | 25 | 0 | ELGEWGLDNYLS<br>VK        |               |
| 484 | 498 | 1913.94 | 1912.93 | 1912.874 | 28 | 0 | QVTQYVSDEPWG<br>WYR       |               |

<sup>a</sup> Exp., experimental molecular weight (MW).

<sup>b</sup> Theo., theoretical molecular weight (MW).

<sup>c</sup> These peptides were identified after derivatization by a positively charged tag, N-Tris (2,4,6-trimethoxyphenyl) phosphonium-acetyl (TMPP-Ac), that enhanced the rate of peptide ionization. A custom monoisotopic modification titled TMPP-Ac (N-term) (m/z 573.18841) was set in the modifications file of Mascot to accommodate TMPP derivatization. Variable modification, TMPP-Ac (N-term).

Supplemental Table 3. Most significantly up-regulated metabolic pathways during cotton ovule development as identified by KOBAS<sup>a</sup>

| Serial No. | KEGG pathway(s)                 | No. of <i>Arabidopsis</i> proteins located in various pathways | No. of up-regulated proteins in wild-type cotton | p-value               | FDR-corrected p-value (<0.001) |
|------------|---------------------------------|----------------------------------------------------------------|--------------------------------------------------|-----------------------|--------------------------------|
|            | Total                           | 3001                                                           | 81                                               | —                     | —                              |
| 1          | Nucleotide sugar metabolism     | 14                                                             | 7                                                | $1.24 \times 10^{-7}$ | $1.46 \times 10^{-6}$          |
| 2          | Ascorbate & aldarate metabolism | 20                                                             | 7                                                | $1.32 \times 10^{-6}$ | $3.82 \times 10^{-6}$          |
| 3          | Cytoskeleton proteins           | 40                                                             | 9                                                | $1.46 \times 10^{-6}$ | $3.82 \times 10^{-6}$          |
| 4          | Glycolysis & gluconeogenesis    | 55                                                             | 9                                                | $1.85 \times 10^{-5}$ | $3.11 \times 10^{-5}$          |
| 5          | Pyruvate metabolism             | 37                                                             | 7                                                | $6.78 \times 10^{-5}$ | $9.98 \times 10^{-5}$          |
| 6          | Starch & sucrose metabolism     | 69                                                             | 9                                                | 0.0001                | 0.0001                         |
| 7          | Gly, Ser, & Thr metabolism      | 28                                                             | 6                                                | 0.0001                | 0.0001                         |
| 8          | Chaperones & folding catalysts  | 30                                                             | 6                                                | 0.0002                | 0.0002                         |
| 9          | Amyotrophic lateral sclerosis   | 6                                                              | 3                                                | 0.0006                | 0.0005                         |

<sup>a</sup>Pathways were manually curated for plant specificity and accuracy. The web site for the KEGG pathway database is <http://www.genome.jp/kegg/pathway.html>.



Supplemental Table 4. Comparisons of proteins commonly identified in four different cotton proteomes

| Spot No. | Protein name                          | NCBI acc. No. | pI/MW (exp.) | pI/MW (theo.) | Spot No. in ref. 18 | NCBI acc. no. | Spot No. in ref. 40 | NCBI acc. No. | Spot No. in ref. 39 | NCBI acc. No. |
|----------|---------------------------------------|---------------|--------------|---------------|---------------------|---------------|---------------------|---------------|---------------------|---------------|
| 1        | profilin                              | ABO43717      | 5.33/13.01   | 5.38/14.41    | 36                  | AAO92742      |                     |               | 4                   | EV489411      |
| 2        | major latex-like protein              | FJ415202      | 5.44/14.83   | 5.46/17.16    |                     |               |                     |               |                     |               |
| 3        | annexin 1                             | AAR13288      | 6.31/15.81   | 6.19/36.15    | 27                  | AAR13288      | 93                  | AAR13288      | 13                  | ES793672      |
| 4        | copper/zinc superoxide dismutase      | FJ415203      | 5.83/15.98   | 5.47/15.36    |                     |               |                     |               |                     |               |
| 5        | fiber annexin                         | AAC33305      | 6.11/16.04   | 6.34/36.21    | 26                  | AAC33305      | 27                  | AAC33305      | 10                  | CO129429      |
| 6        | annexin                               | AAB67993      | 6.08/16.10   | 6.41/36.03    | 25                  | AAB67993      | 28                  | AAB67993      | 9                   | ES795476      |
| 7        | copper/zinc superoxide dismutase      | FJ415203      | 5.83/16.35   | 5.47/15.36    |                     |               |                     |               |                     |               |
| 8        | peroxiredoxin                         | FJ415174      | 5.35/17.41   | 5.58/17.30    | 37                  | BF274296      |                     |               |                     |               |
| 9        | dimethylmenaquinone methyltransferase | FJ415179      | 5.41/18.54   | 5.60/18.05    | 46                  | CO099125      | 108                 | AAM61756      |                     |               |
| 10       | benzoquinone reductase                | ABN12321      | 6.09/21.65   | 6.09/21.65    |                     |               | 103                 | AAM78225      |                     |               |
| 11       | ascorbate peroxidase                  | ABR18607      | 5.13/27.49   | 5.93/27.74    | 1                   | CO096528      |                     |               |                     |               |
| 12       | cytosolic ascorbate peroxidase        | ABR18607      | 5.43/27.51   | 5.93/27.74    |                     |               |                     |               |                     |               |

|    |                                    |          |            |            |    |          |     |          |
|----|------------------------------------|----------|------------|------------|----|----------|-----|----------|
| 13 | benzoquinone reductase             | ABN12321 | 6.27/27.60 | 6.09/21.65 |    |          |     |          |
| 14 | benzoquinone reductase             | ABN12320 | 6.47/27.83 | 6.20/21.79 |    |          |     |          |
| 15 | cytosolic ascorbate peroxidase     | ABR18607 | 5.68/27.84 | 5.93/27.74 |    |          |     |          |
| 16 | ascorbate peroxidase               | ABR18607 | 5.29/27.87 | 5.93/27.74 |    |          |     |          |
| 17 | ascorbate peroxidase               | FJ415185 | 4.96/27.89 | 5.62/27.58 |    |          |     |          |
| 18 | annexin                            | FJ415173 | 6.52/28.49 | 6.74/35.98 | 24 | CO496267 | 95  | AAB67994 |
| 19 | ascorbate peroxidase               | ABR18607 | 5.32/28.70 | 5.93/27.74 | 2  | CO096528 |     |          |
| 20 | ascorbate peroxidase               | ABR18607 | 5.64/28.75 | 5.93/27.74 | 3  | CO107707 |     |          |
| 21 | ascorbate peroxidase               | ABR18607 | 5.15/29.28 | 5.93/27.74 | 4  | CO096528 | 102 | AAC08576 |
| 22 | $\alpha$ -1,4 glucan phosphorylase | FJ415211 | 4.94/30.21 | 5.32/10.67 | 18 | DT457191 |     |          |
| 23 | s-formylglutathione hydrolase      | FJ415188 | 6.59/30.65 | 6.82/32.18 |    |          |     |          |
| 24 | triosephosphate isomerase          | FJ415177 | 6.53/31.54 | 6.00/27.47 | 40 | DT460335 |     |          |
| 25 | 20S proteasome subunit $\alpha$ -1 | FJ415181 | 6.44/31.80 | 5.91/27.39 | 49 | CO121697 | 151 | O24362   |
| 26 | heat shock cognate 70              | FJ415196 | 6.27/32.83 | 5.07/71.57 |    |          |     |          |
| 27 | catalase                           | FJ415187 | 6.30/33.59 | 6.68/57.25 |    |          | 13  | CAA36380 |

|    |                                             |          |            |            |    |          |     |          |
|----|---------------------------------------------|----------|------------|------------|----|----------|-----|----------|
| 28 | serine<br>hydroxymethyltransferase          | FJ415180 | 5.54/34.18 | 7.57/52.38 | 47 | AI731061 |     |          |
| 29 | lactoylglutathione lyase                    | FJ415204 | 5.71/34.38 | 5.69/32.61 |    |          |     |          |
| 30 | alpha-soluble NSF<br>attachment protein     | FJ415171 | 5.08/34.75 | 5.11/33.05 | 17 | CO099225 |     |          |
| 31 | serine<br>hydroxymethyltransferase          | FJ415180 | 5.83/34.82 | 7.57/52.38 |    |          |     |          |
| 32 | UER1                                        | FJ415167 | 5.94/34.94 | 5.73/33.95 | 11 | CO122899 |     |          |
| 33 | UER1                                        | FJ415167 | 6.22/34.97 | 5.73/33.95 | 12 | CO122899 |     |          |
| 34 | fructokinase                                | FJ415169 | 5.05/36.08 | 5.28/35.20 | 15 | CO106532 |     |          |
| 35 | enolase                                     | ABW21688 | 5.21/36.28 | 5.49/47.98 |    |          | 117 | CAA41115 |
| 36 | actin                                       | AAP73454 | 5.43/36.64 | 5.23/41.90 | 29 | AAP73454 | 79  | AAP73455 |
| 37 | granule bound starch<br>synthase            | FJ415189 | 4.97/36.64 | 8.79/63.84 |    |          |     |          |
| 38 | stromal ascorbate<br>peroxidase             | FJ415186 | 6.24/36.78 | 8.89/41.05 |    |          |     |          |
| 39 | granule bound starch<br>synthase            | FJ415205 | 4.91/36.78 | 8.59/67.73 |    |          |     |          |
| 40 | chloroplast stromal<br>ascorbate peroxidase | FJ415186 | 6.10/37.04 | 8.89/41.05 |    |          |     |          |
| 41 | glutamine synthase                          | FJ415178 | 5.64/37.12 | 5.77/39.36 | 41 | BG447133 | 212 | CAA42689 |
| 42 | malate dehydrogenase                        | FJ415192 | 6.14/38.50 | 6.10/36.87 |    |          |     |          |

|    |                                                      |          |            |            |    |          |     |          |    |          |
|----|------------------------------------------------------|----------|------------|------------|----|----------|-----|----------|----|----------|
| 43 | phenylcoumaran benzylic ether reductase-like protein | ABN12322 | 5.58/38.89 | 5.76/33.89 |    |          |     |          | 16 | DW226959 |
| 44 | glyceraldehyde-3-phosphate dehydrogenase C subunit   | FJ415206 | 6.35/39.17 | 7.70/36.65 |    |          | 91  | CAD79700 |    |          |
| 45 | $\beta$ -tubulin 19                                  | ABY86665 | 5.75/39.76 | 4.76/50.65 | 34 | AAL92118 | 69  | AAL92118 | 34 | DT544715 |
| 46 | $\alpha$ -tubulin 4                                  | AAN33000 | 5.57/39.90 | 5.36/34.41 | 32 | AAN33000 |     |          | 41 | ES807127 |
| 47 | serine hydroxymethyltransferase                      | FJ415180 | 6.31/40.17 | 7.57/52.38 | 48 | CX023265 | 12  | CAB10172 |    |          |
| 48 | $\alpha$ -tubulin                                    | ABO47738 | 5.72/40.45 | 4.97/50.29 | 35 | BAC24799 |     |          | 37 | EE592712 |
| 49 | $\alpha$ -tubulin 4                                  | AAN33000 | 5.43/40.90 | 5.36/34.41 | 31 | AAN33000 |     |          | 38 | DT571427 |
| 50 | glyceraldehyde-3-phosphate dehydrogenase C subunit   | FJ415206 | 6.61/41.24 | 7.70/36.65 |    |          | 23  | P34921   |    |          |
| 51 | phenylcoumaran benzylic ether reductase-like protein | ABN12322 | 5.87/41.46 | 5.76/33.89 | 42 | CO109185 |     |          |    |          |
| 52 | actin                                                | AAP73452 | 5.62/42.35 | 5.44/41.94 |    |          | 92  | AAP73453 |    |          |
| 53 | actin                                                | AAP73457 | 5.56/43.29 | 5.31/41.91 | 28 | AAP73460 | 140 | AAB62881 |    |          |
| 54 | 2-nitropropane dioxygenase                           | FJ415176 | 5.43/43.73 | 5.32/36.17 | 39 | DT456206 |     |          |    |          |
| 55 | quinone oxidoreductase                               | FJ415175 | 5.21/45.90 | 5.28/34.39 | 38 | CO088730 |     |          |    |          |
| 56 | malate dehydrogenase                                 | FJ415192 | 6.67/46.15 | 6.10/35.87 |    |          |     |          |    |          |
| 57 | gibberellin 20-oxidase 1                             | ABA01482 | 5.23/48.01 | 5.35/41.72 | 44 | CAC26951 |     |          |    |          |

|    |                                         |          |            |            |    |          |     |          |
|----|-----------------------------------------|----------|------------|------------|----|----------|-----|----------|
| 58 | flavanone-3-hydroxylase                 | ABM64799 | 5.33/48.10 | 5.43/41.75 | 45 | AAO63022 |     |          |
| 59 | mannitol dehydrogenase                  | FJ415191 | 5.93/49.11 | 5.85/39.57 |    |          |     |          |
| 60 | adenosine kinase                        | FJ415170 | 5.46/49.66 | 5.47/37.81 | 16 | BF272730 | 211 | AAU14831 |
| 61 | adenosine kinase                        | FJ415170 | 5.46/49.66 | 5.47/37.81 |    |          |     |          |
| 62 | phosphoglycerate dehydrogenase          | FJ415190 | 5.20/49.84 | 7.14/64.06 |    |          |     |          |
| 63 | heat shock protein 70                   | FJ415199 | 4.59/49.92 | 5.10/71.35 |    |          |     |          |
| 64 | pyruvate dehydrogenase $\alpha$ subunit | FJ415197 | 6.74/50.17 | 7.16/43.69 |    |          |     |          |
| 65 | phosphoglycerate dehydrogenase          | FJ415190 | 5.13/50.35 | 7.14/64.06 |    |          |     |          |
| 66 | anthocyanidin reductase                 | ABM64802 | 5.53/51.74 | 5.54/36.54 | 43 | CAD91910 |     |          |
| 67 | heat shock protein 70                   | FJ415194 | 4.69/52.90 | 5.14/71.28 |    |          | 180 | CAA47345 |
| 68 | heat shock protein 70                   | FJ415196 | 4.75/52.95 | 5.10/71.37 |    |          | 177 | CAA52149 |
| 69 | luminal binding protein                 | FJ415200 | 4.57/53.09 | 5.13/73.57 |    |          |     |          |
| 70 | luminal binding protein                 | FJ415200 | 4.50/53.55 | 5.13/73.57 |    |          |     |          |
| 71 | actin                                   | AAP73460 | 5.45/53.58 | 5.37/41.94 | 30 | AAP73460 | 76  | AAP73460 |
| 72 | luminal binding protein                 | FJ415200 | 4.55/53.94 | 5.13/73.57 |    |          |     |          |

|    |                                      |          |            |            |    |          |    |          |             |
|----|--------------------------------------|----------|------------|------------|----|----------|----|----------|-------------|
| 73 | heat shock protein 70                | FJ415195 | 4.75/54.07 | 5.07/71.57 |    |          | 50 | AAL59960 |             |
| 74 | phosphoglycerate kinase              | FJ415172 | 6.14/56.40 | 5.97/42.29 | 21 | BAA33802 | 82 | BAA33802 |             |
| 75 | chloroplast biotin<br>carboxylase    | ABP98813 | 6.30/57.92 | 7.57/59.17 | 23 | AAF80469 |    |          |             |
| 76 | dihydrolipoamide<br>dehydrogenase    | FJ415193 | 6.62/59.37 | 6.93/54.13 |    |          |    |          |             |
| 77 | chloroplast biotin<br>carboxylase    | ABP98813 | 6.31/59.64 | 7.57/59.17 | 22 | AAC23573 |    |          |             |
| 78 | UGP2                                 | FJ415165 | 5.54/60.41 | 5.62/51.45 | 7  | CO091798 |    |          |             |
| 79 | UGP1                                 | FJ415164 | 6.07/61.70 | 5.81/51.74 | 5  | CO109042 |    |          |             |
| 80 | UGP1                                 | FJ415164 | 6.10/61.70 | 5.81/51.74 | 6  | CO109042 |    |          | 14 EV482616 |
| 81 | UGD1                                 | FJ415166 | 6.11/62.84 | 5.84/53.64 | 9  | Q96558   |    |          |             |
| 82 | myo-inositol-1-phosphate<br>synthase | FJ415168 | 5.69/63.53 | 5.46/56.54 | 14 | Q9LW96   |    |          |             |
| 83 | UGD1                                 | FJ415166 | 6.30/64.12 | 5.84/53.64 | 8  | AAB58398 |    |          |             |
| 84 | acyltransferase-like protein         | AAL67994 | 5.67/64.47 | 5.67/48.29 | 19 | AAL67994 | 61 | AAL67994 |             |
| 85 | acyltransferase-like protein         | AAL67994 | 5.56/64.82 | 5.67/48.29 | 20 | AAL67994 |    |          |             |
| 86 | pyruvate decarboxylase               | FJ415201 | 6.57/69.52 | 6.13/60.77 |    |          |    |          |             |
| 87 | glycine-rich RNA-binding<br>protein  | FJ415184 | 7.82/15.01 | 7.82/17.08 |    |          |    |          | 5 DW231397  |

|     |                                                |          |            |            |    |          |          |          |
|-----|------------------------------------------------|----------|------------|------------|----|----------|----------|----------|
| 88  | benzoquinone reductase                         | FJ415183 | 7.68/24.72 | 6.97/21.74 |    |          |          |          |
| 89  | manganese superoxide<br>dismutase              | AAC78469 | 7.49/25.40 | 8.54/22.14 |    |          |          |          |
| 90  | heat shock cognate protein<br>70               | FJ415194 | 7.52/33.12 | 5.14/71.28 |    |          |          |          |
| 91  | glyceraldehyde-3-phosphate<br>dehydrogenase    | FJ415182 | 7.74/43.72 | 7.06/37.04 |    | 143      | AAM65189 |          |
| 92  | isocitrate dehydrogenase                       | FJ415198 | 7.32/53.15 | 6.29/46.41 |    | 209      | CAD24779 |          |
| 93  | isocitrate dehydrogenase                       | FJ415198 | 7.07/53.29 | 6.29/46.41 |    | 208      | AAM13090 |          |
| 94  | eukaryotic translation<br>initiation factor 5A | GU295062 | 5.55/18.88 | 5.61/17.63 | 60 | CAA45104 | 109      | CAA45104 |
| 95  | chalcone isomerase                             | GU295063 | 4.84/29.85 | 4.85/23.42 | 52 | BQ411585 |          |          |
| 96  | triosephosphate isomerase                      | GU295064 | 5.52/30.18 | 6.66/33.50 | 53 | BAC92722 |          |          |
| 97  | thiazole biosynthetic<br>enzyme                | GU295068 | 5.03/36.81 | 5.64/38.24 | 54 | AAW66657 |          |          |
| 98  | transaldolase                                  | GU295065 | 4.91/45.56 | 5.78/43.06 | 50 | CAA31366 |          |          |
| 99  | U2 small nuclear<br>ribonucleoprotein A        | GU295066 | 5.06/45.90 | 4.97/32.19 | 57 | CO130432 |          |          |
| 100 | transaldolase                                  | GU295065 | 5.09/46.62 | 5.78/43.06 | 58 | BQ401915 |          |          |
| 101 | chalcone synthase                              | ABS52573 | 6.11/54.17 | 6.12/42.98 | 51 | CAA64366 |          |          |
| 102 | protein disulfide isomerase                    | ABO41843 | 5.01/65.30 | 5.07/55.89 | 55 | CO080059 | 55       | ES791121 |

|     |                                   |          |            |            |    |          |    |          |
|-----|-----------------------------------|----------|------------|------------|----|----------|----|----------|
| 103 | RNA helicase -like protein        | GU295067 | 5.91/69.24 | 5.65/56.15 | 59 | CO098559 |    |          |
| 104 | betaine-aldehyde<br>dehydrogenase | AAR23816 | 5.44/69.43 | 5.60/55.37 | 61 | AAR23816 | 55 | AAR23816 |

---



## Supplemental Figure Legends

**Supplemental Fig. 1. Comparative proteomic analysis of wild-type and *fl* mutant cotton ovules.** Silver-stained 2-DE analyses using proteins (100 µg) extracted from wild-type ovules with fibers attached (WT-10, upper panel) and *fl* mutant (FL-10, lower panel) ovules. Triplicate protein samples obtained from different cotton ovule collections were separated on 12.5% SDS-PAGE gels with pH ranging from 4 to 7 (for best resolution, only pH 4–6.8 is shown) and 3 to 10 (only pH 6.7–9 is shown) using 24-cm Immobiline DryStrip gels and scanned after silver staining. One representative gel is shown. The protein spots numbered 1–93 (labeled in black) were present in significantly higher levels in wild-type samples and spots 94–104 (labeled in red) were preferentially accumulated in the mutant. Open arrows indicate eight protein spots present in higher levels in wild-type samples that could not be identified, and circles indicate two protein spots present in higher levels after silver staining, but were not found after Coomassie Blue R-350 staining prior to MALDI-TOF analysis.

**Supplemental Fig. 2. Deduced amino acid sequences of UER1, UGD1, UGP1, and UGP2 from upland cotton materials.** Peptide sequences obtained from Nano-LC-FTICR-MS for each of the protein spots that matched sequences in the NCBI “EST others” database are shown in RED, and peptide sequences obtained from MALDI-TOF-TOF MS/MS are shown in BLUE.

**Supplemental Fig. 3. Functional characterization of cotton UER1, UGD1, UGP1,**

**and UGP2.** *A*, UER1 enzyme activity analysis. Top panel, expression and purification of recombinant UER1 (37.2 kDa) after IPTG induction. Middle panel, analysis of UDP-Rha production from UDP-4K6DG by UER1 expressed *in vitro*. The substrate and coenzyme are shown in the upper HPLC trace, and the lower trace shows the products after incubation with the purified enzyme. Bottom panel, mass spectrum identification of L-Rha from the HPLC eluant after cleavage of UDP and alditol acetate derivatization. *B*, UGP1 and UGP2 enzyme activity analysis. Top panel, expression and purification of recombinant UGP1 (56.3 kDa) and UGP2 (55.9 kDa). Middle panel, both UGP1 and UGP2 enzymatically synthesized UDP-D-glucose from D-glucose. Bottom panel, mass spectrum identification of D-Glc from the HPLC eluant after cleavage of UDP and alditol acetate derivatization. *C*, UGD1 enzyme activity analysis. Top panel, expression and purification of recombinant UGD1 (55.5 kDa). Middle panel, synthesis of UDP-GlcA from UDP-Glc and NAD<sup>+</sup> by UGD1. Bottom panel, mass spectrum identification of D-GlcA from the HPLC eluant after cleavage of UDP and trimethylsilyl methoxime derivatization. *D*, GAE3 enzyme activity analysis. Top panel, expression and purification of recombinant GAE3 (53.9 kDa). Middle panel, *in vitro*-expressed GAE3 synthesized UDP-GalA from UDP-GlcA. Bottom panel, mass spectrum identification of UDP-GalA from the HPLC eluant after cleavage of UDP and trimethylsilyl methoxime derivatization.

**Supplemental Fig. 4. Two-DE analysis of proteomes obtained from 1-dpa wild-type or *fl* mutant ovules treated with exogenous ethylene or C24:0 for 24 h.**

Comparative proteomic analysis was carried out as in Supplemental Fig. 1. WT-Air-24, proteome obtained from 1-dpa wild-type cotton ovules cultured in air for 24 h; WT-Eth-24, proteome from 1-dpa ovules cultured in 0.1  $\mu$ M ethylene for 24 h; WT-C:24:0-24, proteome from 1-dpa ovules cultured in 5  $\mu$ M C24:0 for 24 h; FL-Air-24, proteome from 1-dpa *fl* mutant ovules cultured in air for 24 h; FL-Eth-24, proteome from 1-dpa mutant ovules cultured in 0.1  $\mu$ M ethylene for 24 h; FL-C24:0-24, proteome from 1-dpa mutant ovules cultured in 5  $\mu$ M C24:0 for 24 h. Gels of pH 3 to 10 were not performed in this experiment because all polypeptides of interest appeared in gels of pH 4 to 7.

**Supplemental Fig. 5. QRT-PCR analysis of different UDP-L-rhamnose synthase**

**(*RHM*) isoforms in different cotton samples.** *A*, None of the *RHM* transcripts were preferentially expressed in fiber cells. *B*, *RHM* transcription was not activated by exogenous Eth treatment. RNA samples were extracted from WT ovules cultured for 24 h in the presence of 0.1  $\mu$ M Eth. Air, no ethylene was added to the culture.

GenBank Accession Numbers: *RHM1*, FJ415210; *RHM2*, GQ292791; *RHM3*, GQ292792; *RHM4*, GQ292793.

**Supplemental Fig. 6. Major metabolic pathways leading from Glc-1-P or sucrose**

**to various cell wall components.** Modified from Seifert (34). UGP, UDP-D-glucose pyrophosphorylase; UER, UDP-4-keto-6-deoxy-D-glucose 3,5-epimerase 4-reductase; UGD, UDP-D-glucose dehydrogenase; GAE, UDP-D-glucuronic acid 4-epimerase;

Sus, sucrose synthase. RHM, UDP-L-rhamnose synthase. Enzymes in bold were identified from the 2-D gels (Supplemental Fig. 1).

**Supplemental Fig. 7. QRT-PCR analysis of different *GAE* transcripts in developing cotton ovules.** Black bars (with scales on the left side) indicate the increase relative to that obtained from 0-dpa wild-type ovules (which was set to 1) of the same gene to show whether it is preferentially expressed in fiber cells. Open bars (with scales on the right side) indicate the increase for the individual gene relative to cotton *UBQ7*. See legend to Fig. 1 for experimental details and nomenclature. \*\*\*, significant at  $p \leq 0.001$ . GenBank Accession Numbers: *GAE1*, FJ415208; *GAE2*, GQ292788; *GAE3*, GQ292789; *GAE4*, GQ292790; *GAE5*, no complete CDS was obtained.

**Supplemental Fig. 8. Characterization of the *uer1-1 Arabidopsis* mutant.** *A*, schematic of *uer1-1* genomic organization. The T-DNA was inserted between nucleotides 23347178 and 23347179 as determined by sequencing of a genomic clone amplified from the mutant using the reverse primer (RP) and forward primer (FP). *B*, identification of T-DNA insertion by genomic PCR. WT, wild-type (Col); *uer1-1*, homozygous mutant plants. RP, complementary to the region downstream of the T-DNA; FP, complementary to the region upstream of the T-DNA; LBB1, complementary to the left-most region of the T-DNA. *C*, Southern blot analysis. *D*, RT-PCR analysis of *UER1* transcripts in WT and *uer1-1* plants. No *UER1* transcript

was observed in *uer1-1* plants after either 28 or 32 PCR cycles.

**Supplemental Fig. 9. Characterization of the *gae6-1 Arabidopsis* mutant.** A, schematic of *gae6-1* genomic organization. The T-DNA was inserted between nucleotides 8603876 and 8603877 as determined by sequencing of a genomic clone amplified from the mutant using RP' and FP' as primers. B, identification of T-DNA insertion by genomic PCR. WT, wild-type (Col); *gae6-1*, homozygous mutant plants. LBb1.3, complementary to the left-most region of the T-DNA. C, Southern blot analysis. D, RT-PCR analysis of *GAE6* transcripts in WT and *gae6-1* plants. No *GAE6* transcript was observed in *gae6-1* plants after either 28 or 32 PCR cycles.

Supplemental Figures  
 Fig. S1

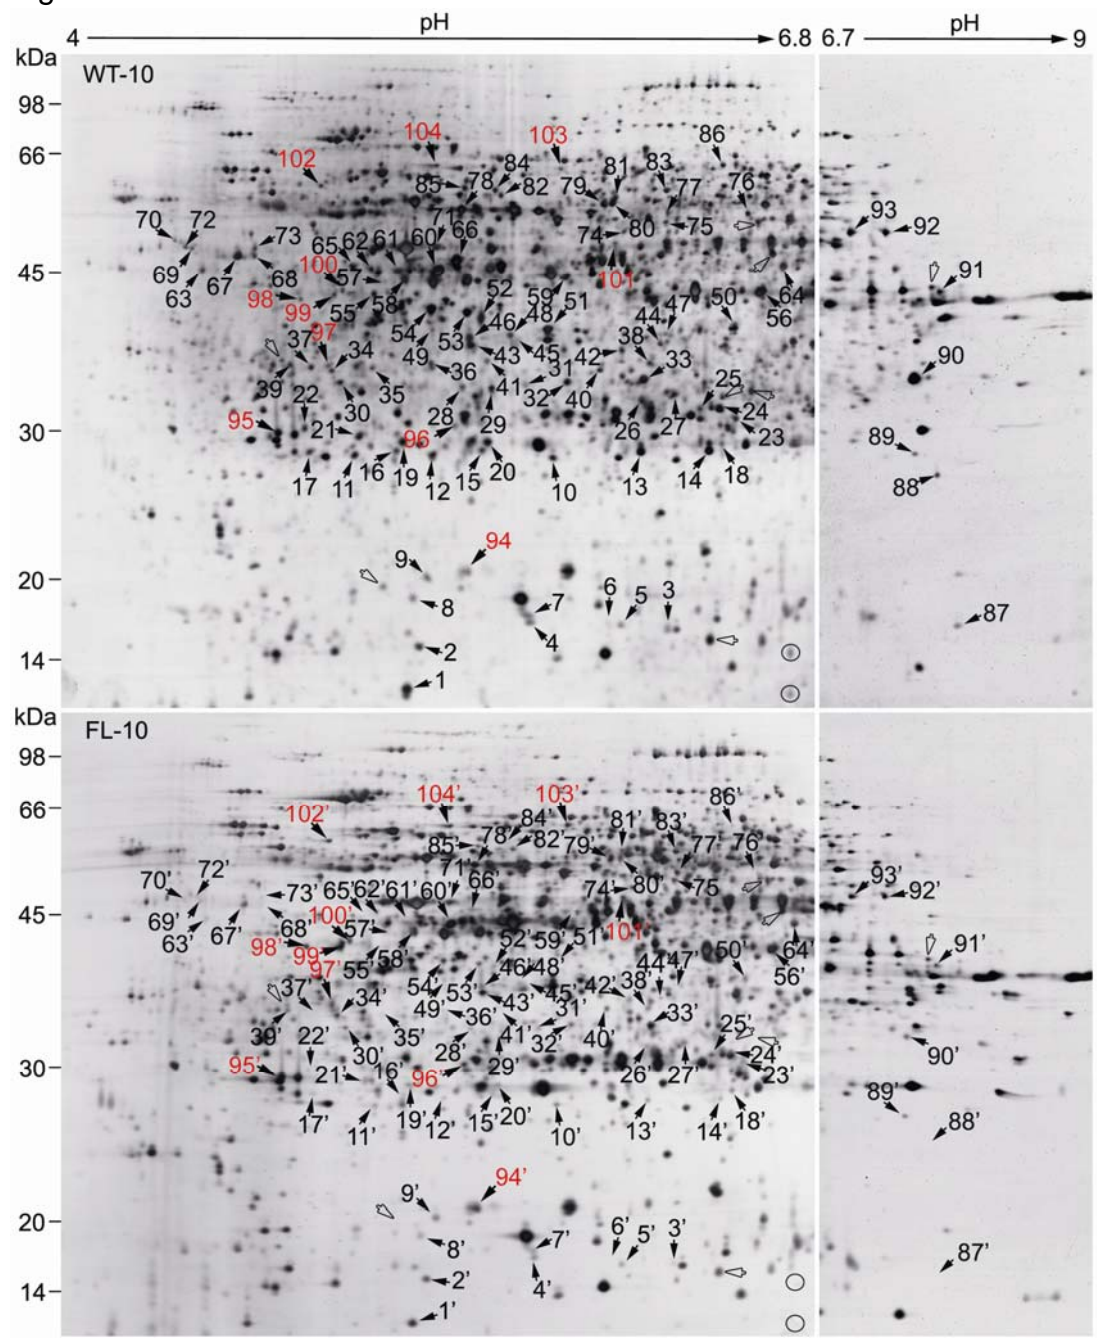

Fig. S2

UER1 (spot 32, 33)

MGFPANGSSD KPLKFLIYGR **TGWIGLLGK** LCESQGIDYE YGSGRLESRI SLESDIANVK PTHVFNAAGV  
TGRPNVDWCE SHKVETIR**TN VVGTLTADV CRDKGLILIN** YATGCIFEYD EAHQIGTGIG FKEEDTPNFT  
GSFYSKTKAM VEELLK NYEN VCTLRVR**MPI SSDLANPRNF** ITKITRYDKV VNIPNSMTIL DELLPISIEM  
GKRNLGTIWN FTNPGWVSHN EILEMYR**DYI DPNFTWKNFN LEEQAKVIVA** PR**SNNELDAT KLKTEFPELL**  
**SIKESLVKYV FEPNKKTGGA**

UGP1 (spot 79, 80)

MEKLDHIKSH LATLSQIGEN EKNGFINLVS RYLSGEAQHI EWSKIQTPTD EWWPYDTLA PLSDDDPAETK  
KLLDKLWVK LNGGLGTTMG CTGPKSVIEV RINGFTFLDLI VQIENLNKK YGCNVPLVLM NSFNTHDDTL  
KIVDKYANSN IQIHTFNQSQ YPRL**LVAEDFT PFPCK**GQPGK DGWYPPGHGD VFPALMNSGK LATFLSQDKE  
YAFVANSNDL GAVMDLKILN HLVKNKNEYC MEVTPKTLAD VKGGTLISYE GKVQLLEIAQ VPDAHVNEFK  
SIEKFKIFNT NNLWLNNAV KRLVEADALK **MEIIPNPK**EV EGTK**VLQLET AAGAAIRFFE HAIGINVPRS**  
RFLPVKATSD LLLVQSDLYT LVDGFVSRNS ARENPENPSI ELGPEFKK**VS NFLSR**FKTIP SIINLDSLTV  
TGDWFGAGI VLKGGVKVIAA KPGEKLEIPD GVIENKEIN GPGDLSS

UGP2 (spot 78)

MEKLEHLKSA VAALSEISEN EKNGFINLVS RYLSGEAQHI EWSKIQTPTD EWWPYDTLS PSPDDPAETK  
KLLDKLWVK LNGGLGTTMG CTGPKSVIEV RINGFTFLDLI VQIENLNKK YGCNVPLVLM NSFNTHDDTL  
KIVDKYSNSN IEIHTFNQSQ YPRLVVEDFA PLPSKGQHGK DGWYPPGHGD VFPALMNSGK LDAFLSQGKE  
YFVANSNDL GAVDMKILN HLVKNKNEYC MEVTPKTLAD VKGGTLISYE GK**VQLLEIAQ VPDEHVNEFK**  
SIEKFK**IFNT NNLWVNLNAI** KRLVEADALK MEIIPNPK**EV NGIKVLQLET AAGAAIRFFD** HAIGINVPRS  
RFLPVKATSD LLLVQSDLYT LVDGFVIRNK DRANPTNPSI ELGPEFKK**VG NFLSR**FKSIP SIIELDSLKV  
TGDWFGAGI VLKGGKVSIAA KPGVKLEIPD GAVIEKKEIN VPEDI

UGD1 (spot 81, 83)

MKICIGAGY VGGPTMAVIA LKCPDIEVAV VDISVPRIAA WNSDQLPIYE PGLDGWKEC RGRNLFFSTD  
VEKHVREADI VFVSVNTPTK TRGLGAGK**AA DLTYWESAAR** MIADVSKSDK IVVEKSTVPV KTAEAEIKIL  
THNSKGIKIQ ILSNPEFLAE GTAIQDLFNP DRVLIGGRET PEGNKAVQAL **KEYAHWPE ERILT**TNLWS  
AELSK**LAANA FLAQR**ISSVN AMSALCEATG ADVTQVSYAV GKDTRIGPKF **LNASVGF**GGG **CFQK**DILNLV  
YICECNGLPE VAEYWKQVIK INDYQKNRFV NRWSSMFNT VSNKK**AILG FAFK**KDGTGDT RETPAIDVCK  
GLLGDKARLS YDPQVTEQ VQRDLSMNF DWDHPLHLQP MSPTTVKQVS CWDAYEATK DAHGICILTE  
WDEFKLDKF RIYDNMQKPA FVFDGRNIVN ADELREIGFI VYSIGKPLDP WLKDMPAVA

Fig. S3

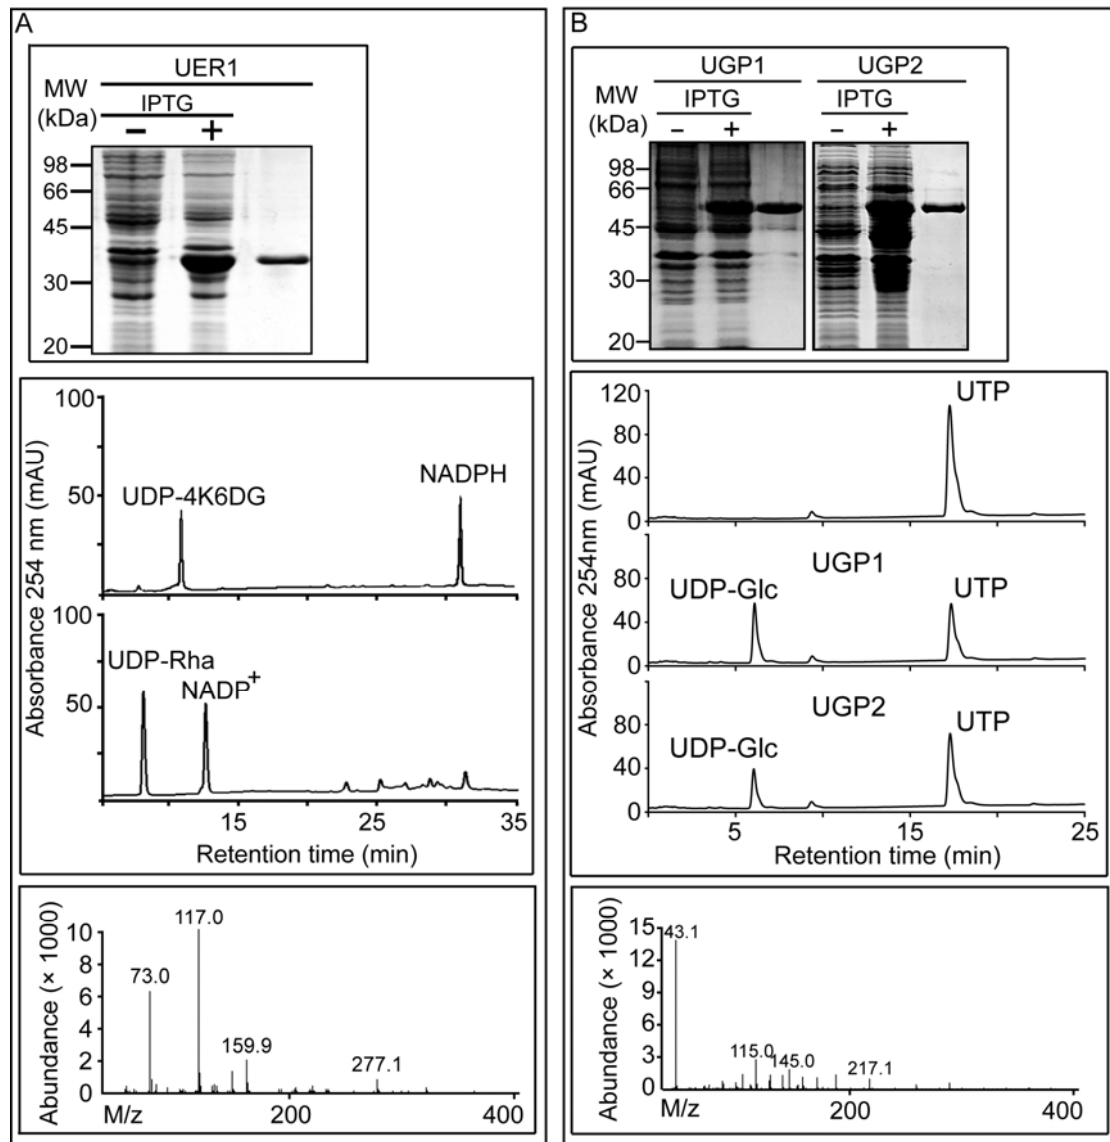



Fig. S3 (continued...)

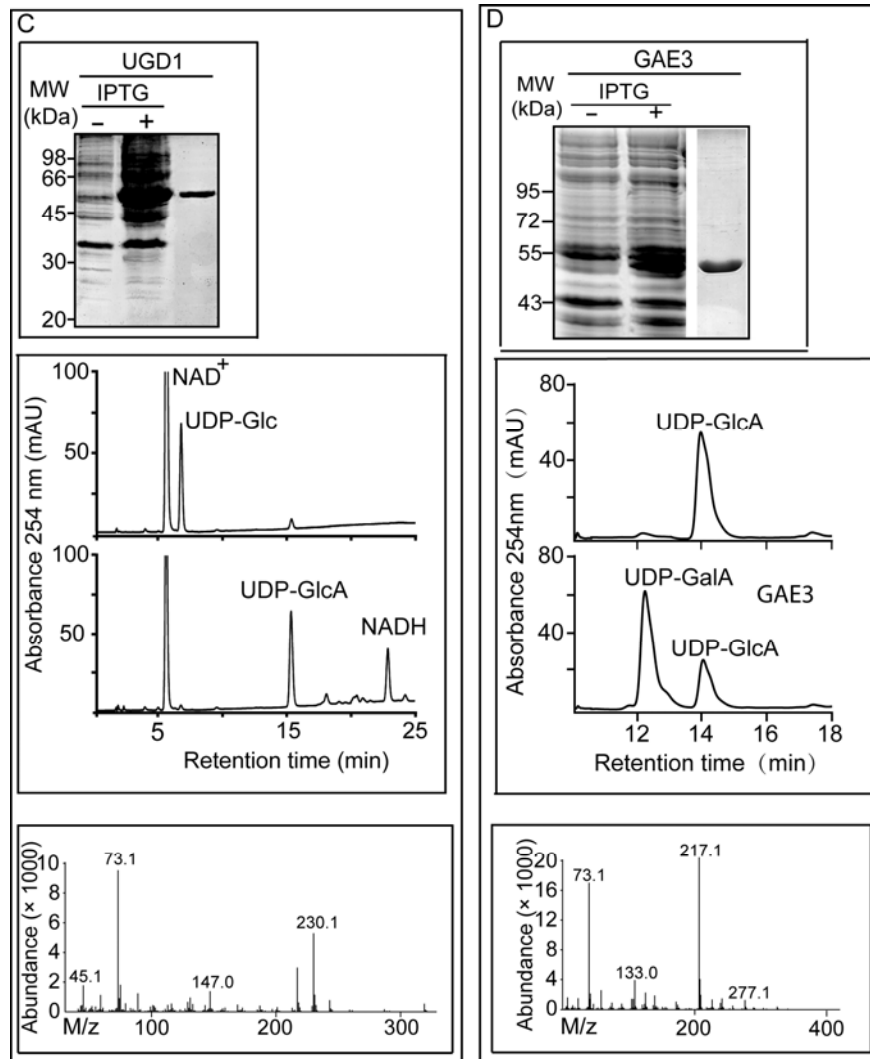

Fig. S4

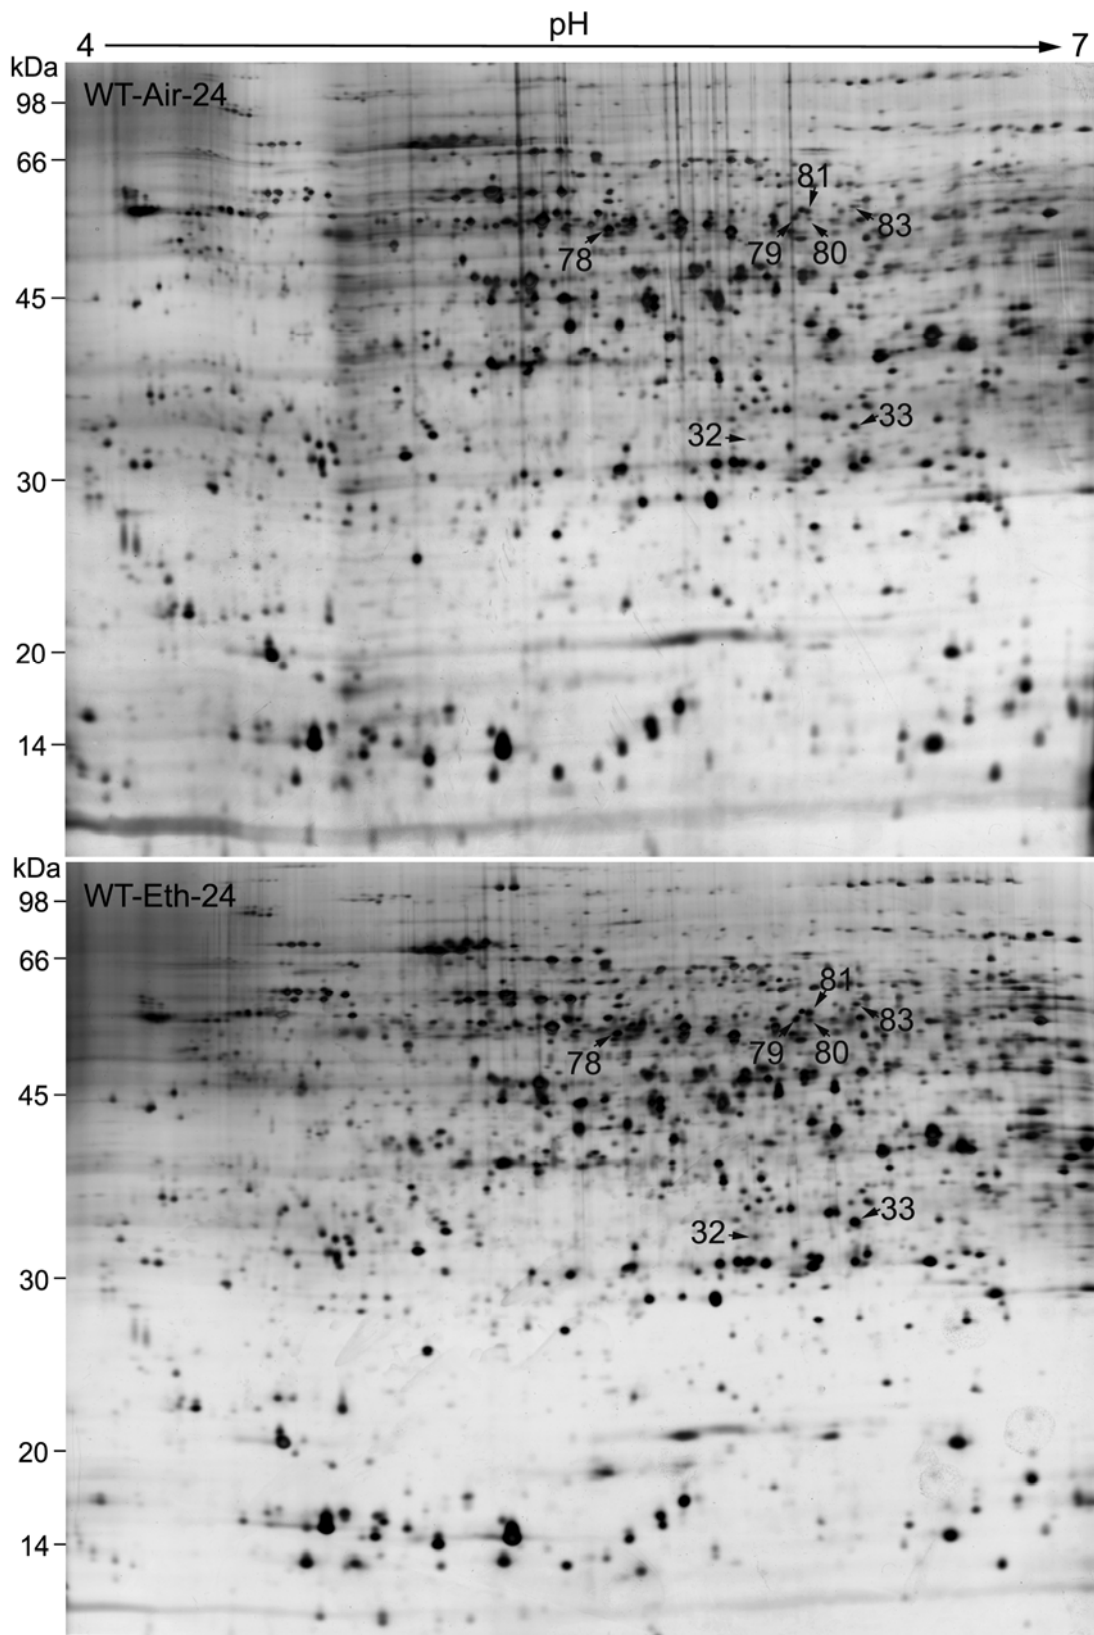

Fig. S4 (continued...)

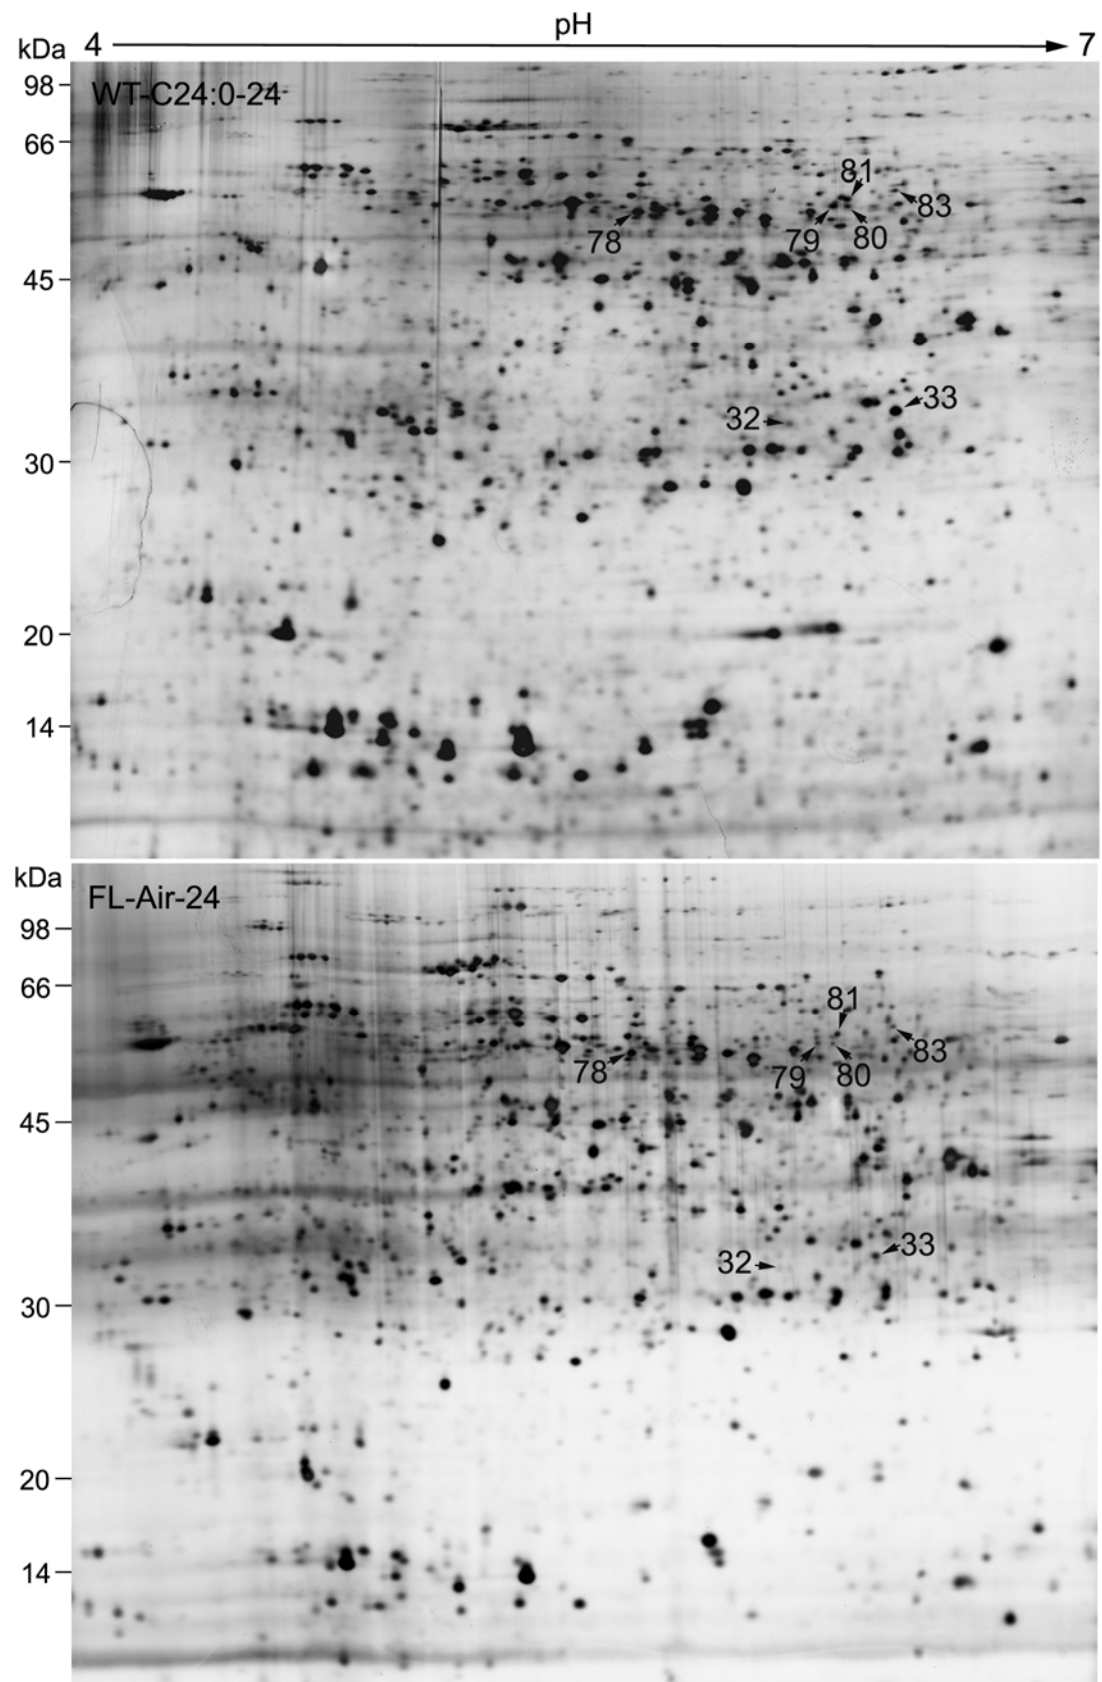

Fig. S4 (continued...)

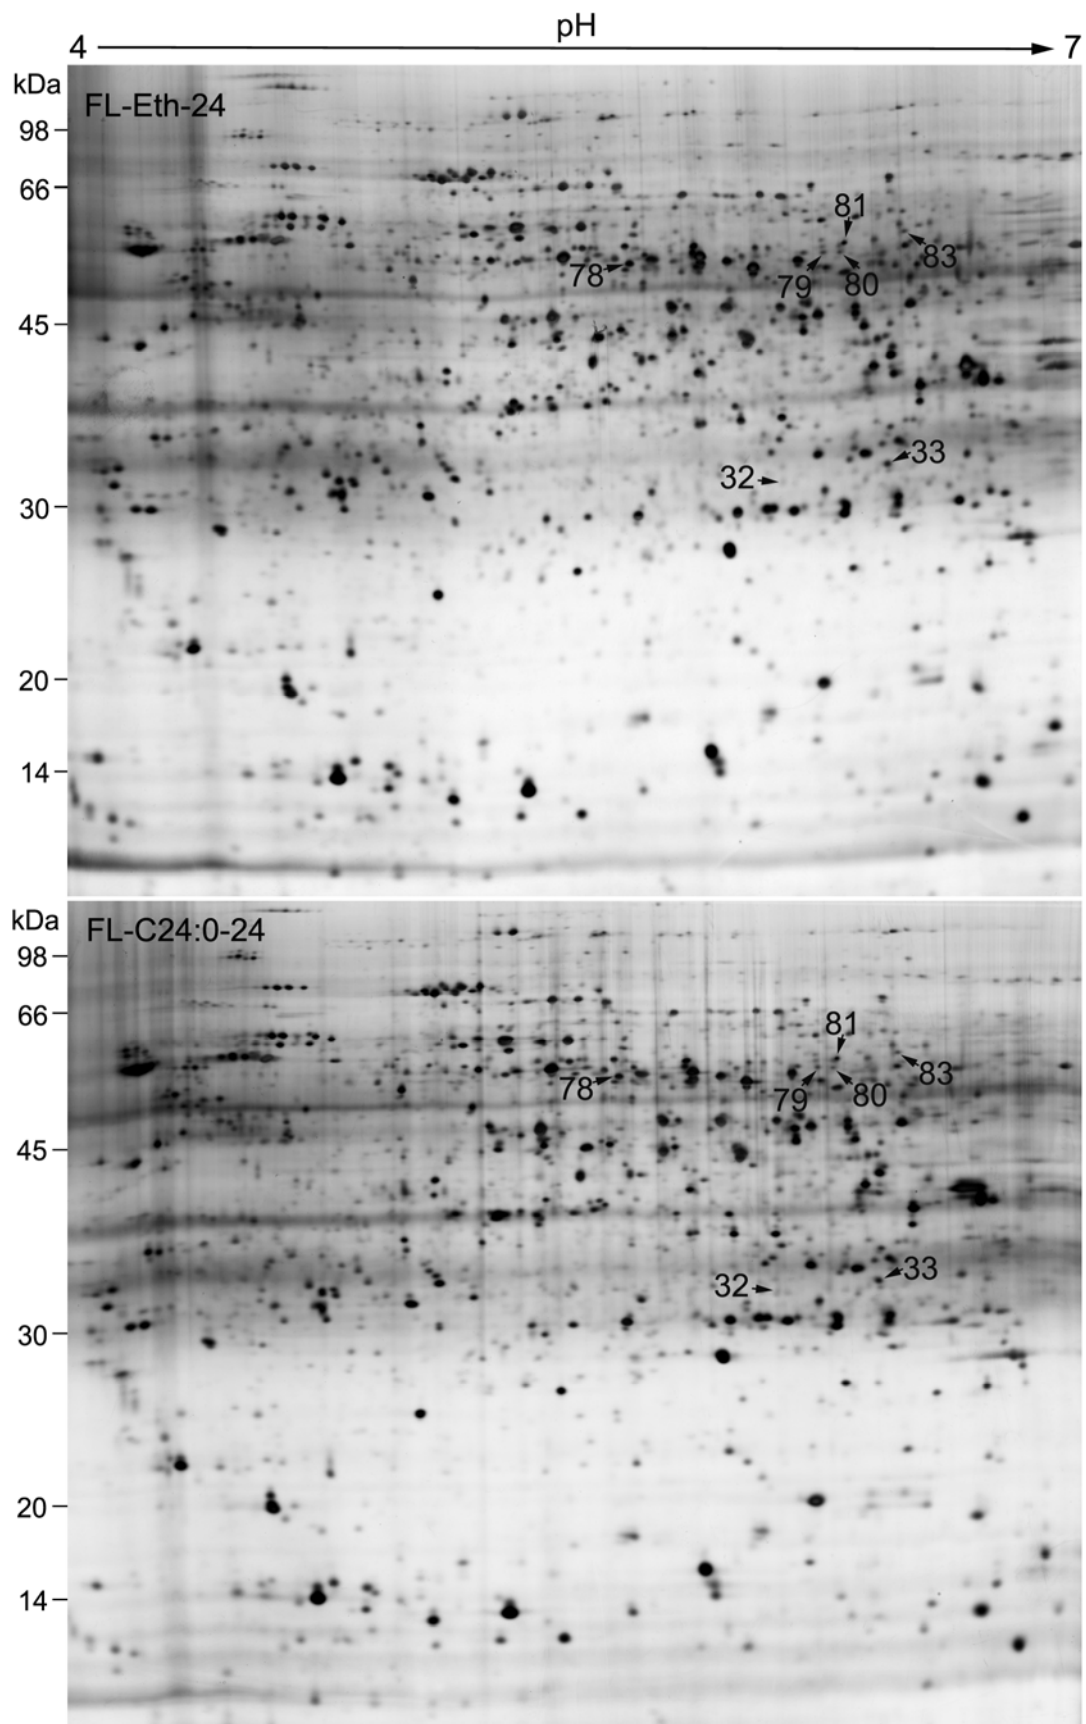

Fig. S5

A

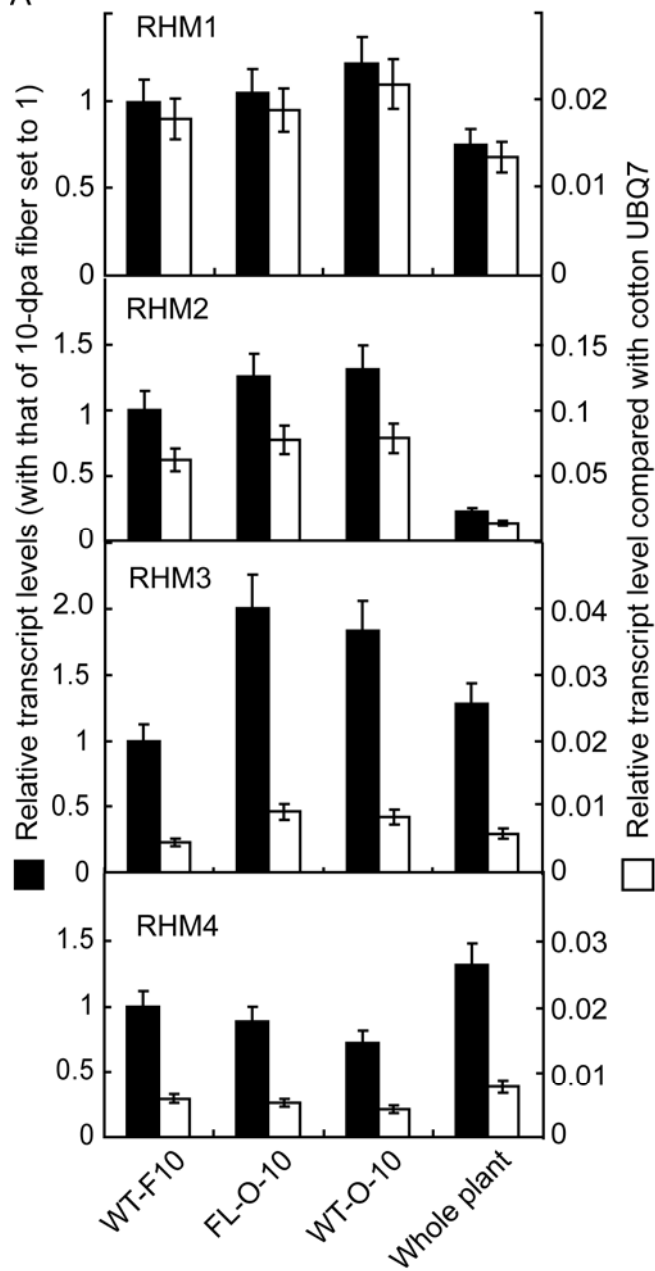

B

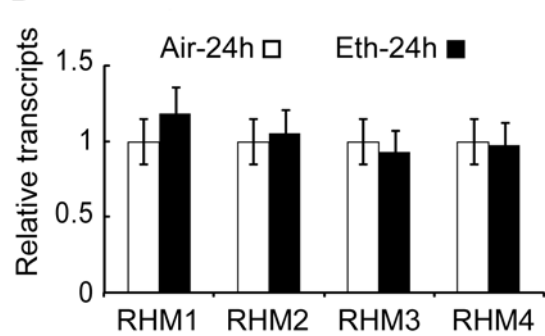

Fig. S6

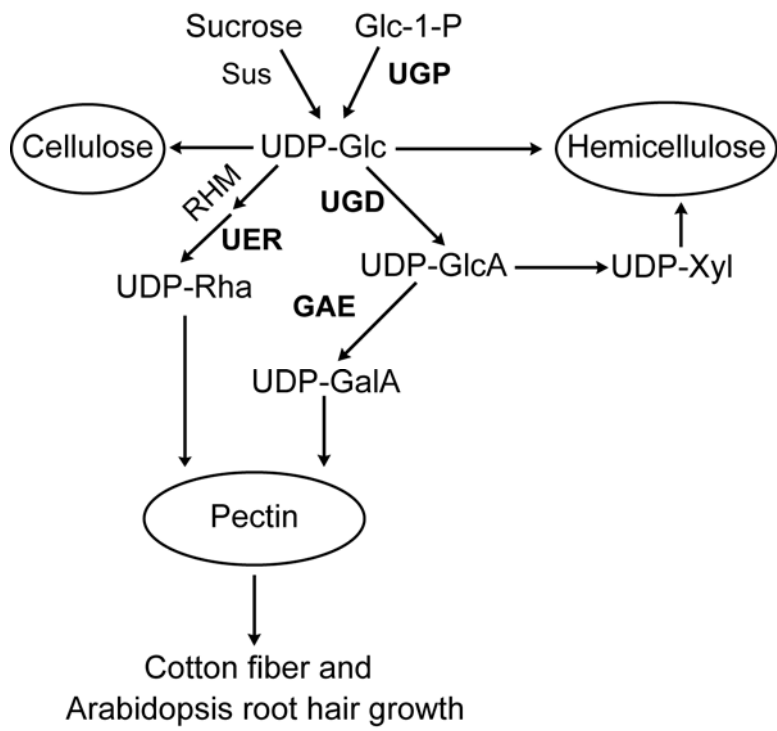

Fig. S7

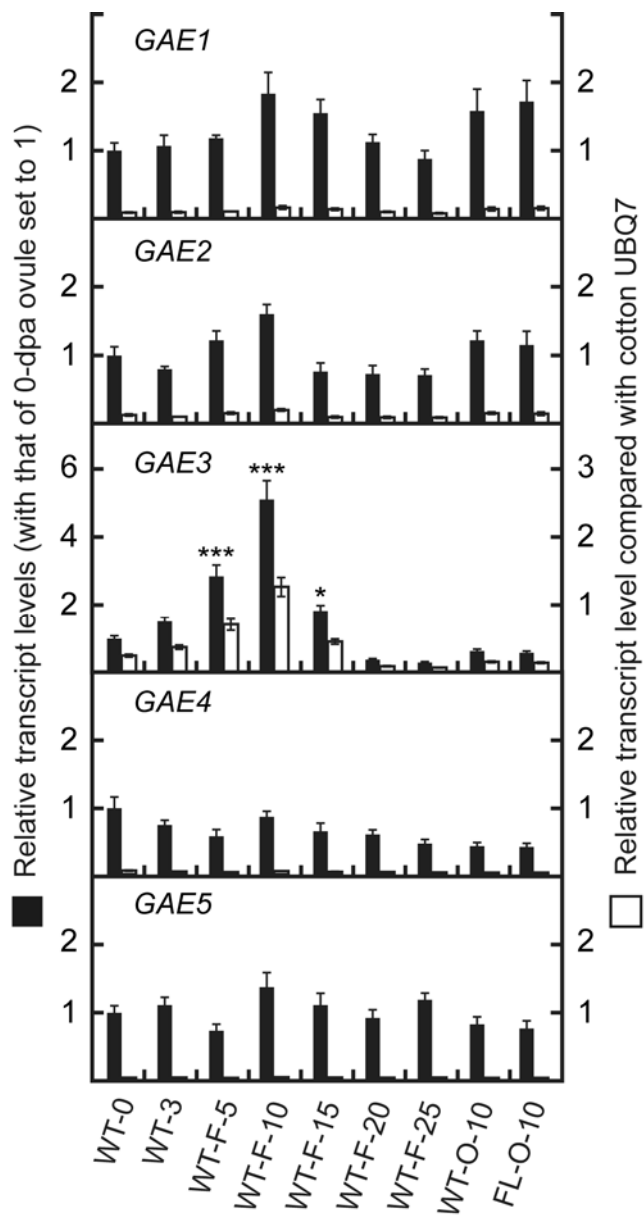

Fig. S8

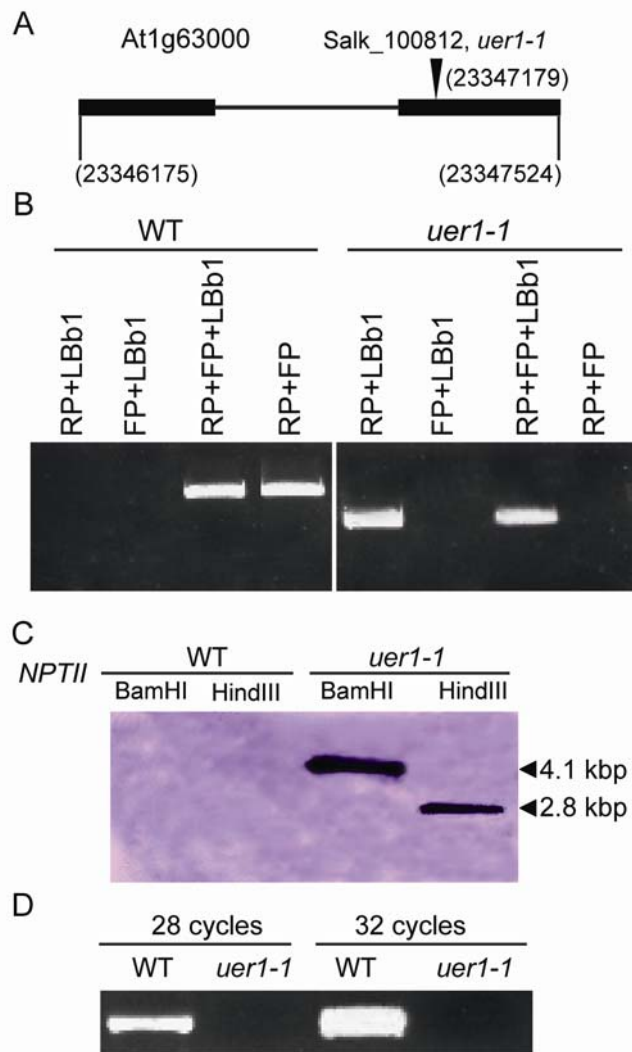



Fig. S9

A

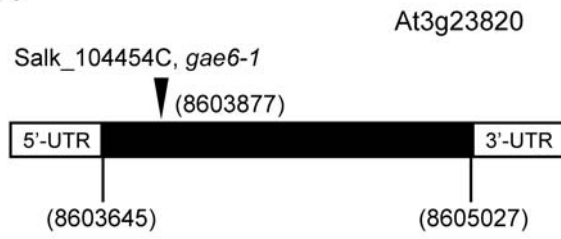

B

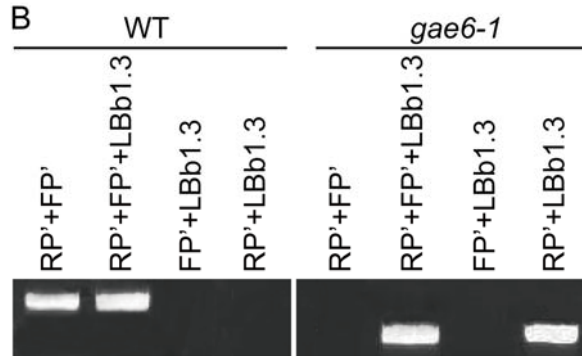

C

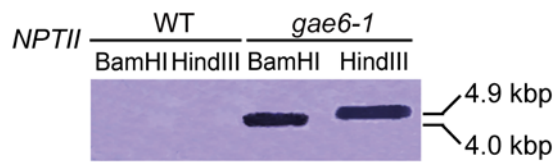

D

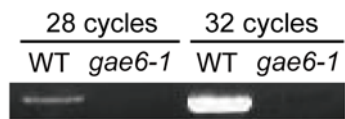

# **Supplemental spectra 1 for Table I**

## **Annotated spectra for Table I: 104 differentially expressed proteins identified by PMF**

Spot numbers of the 104 proteins correspond to the proteins that list in Table I

Spot No. 01

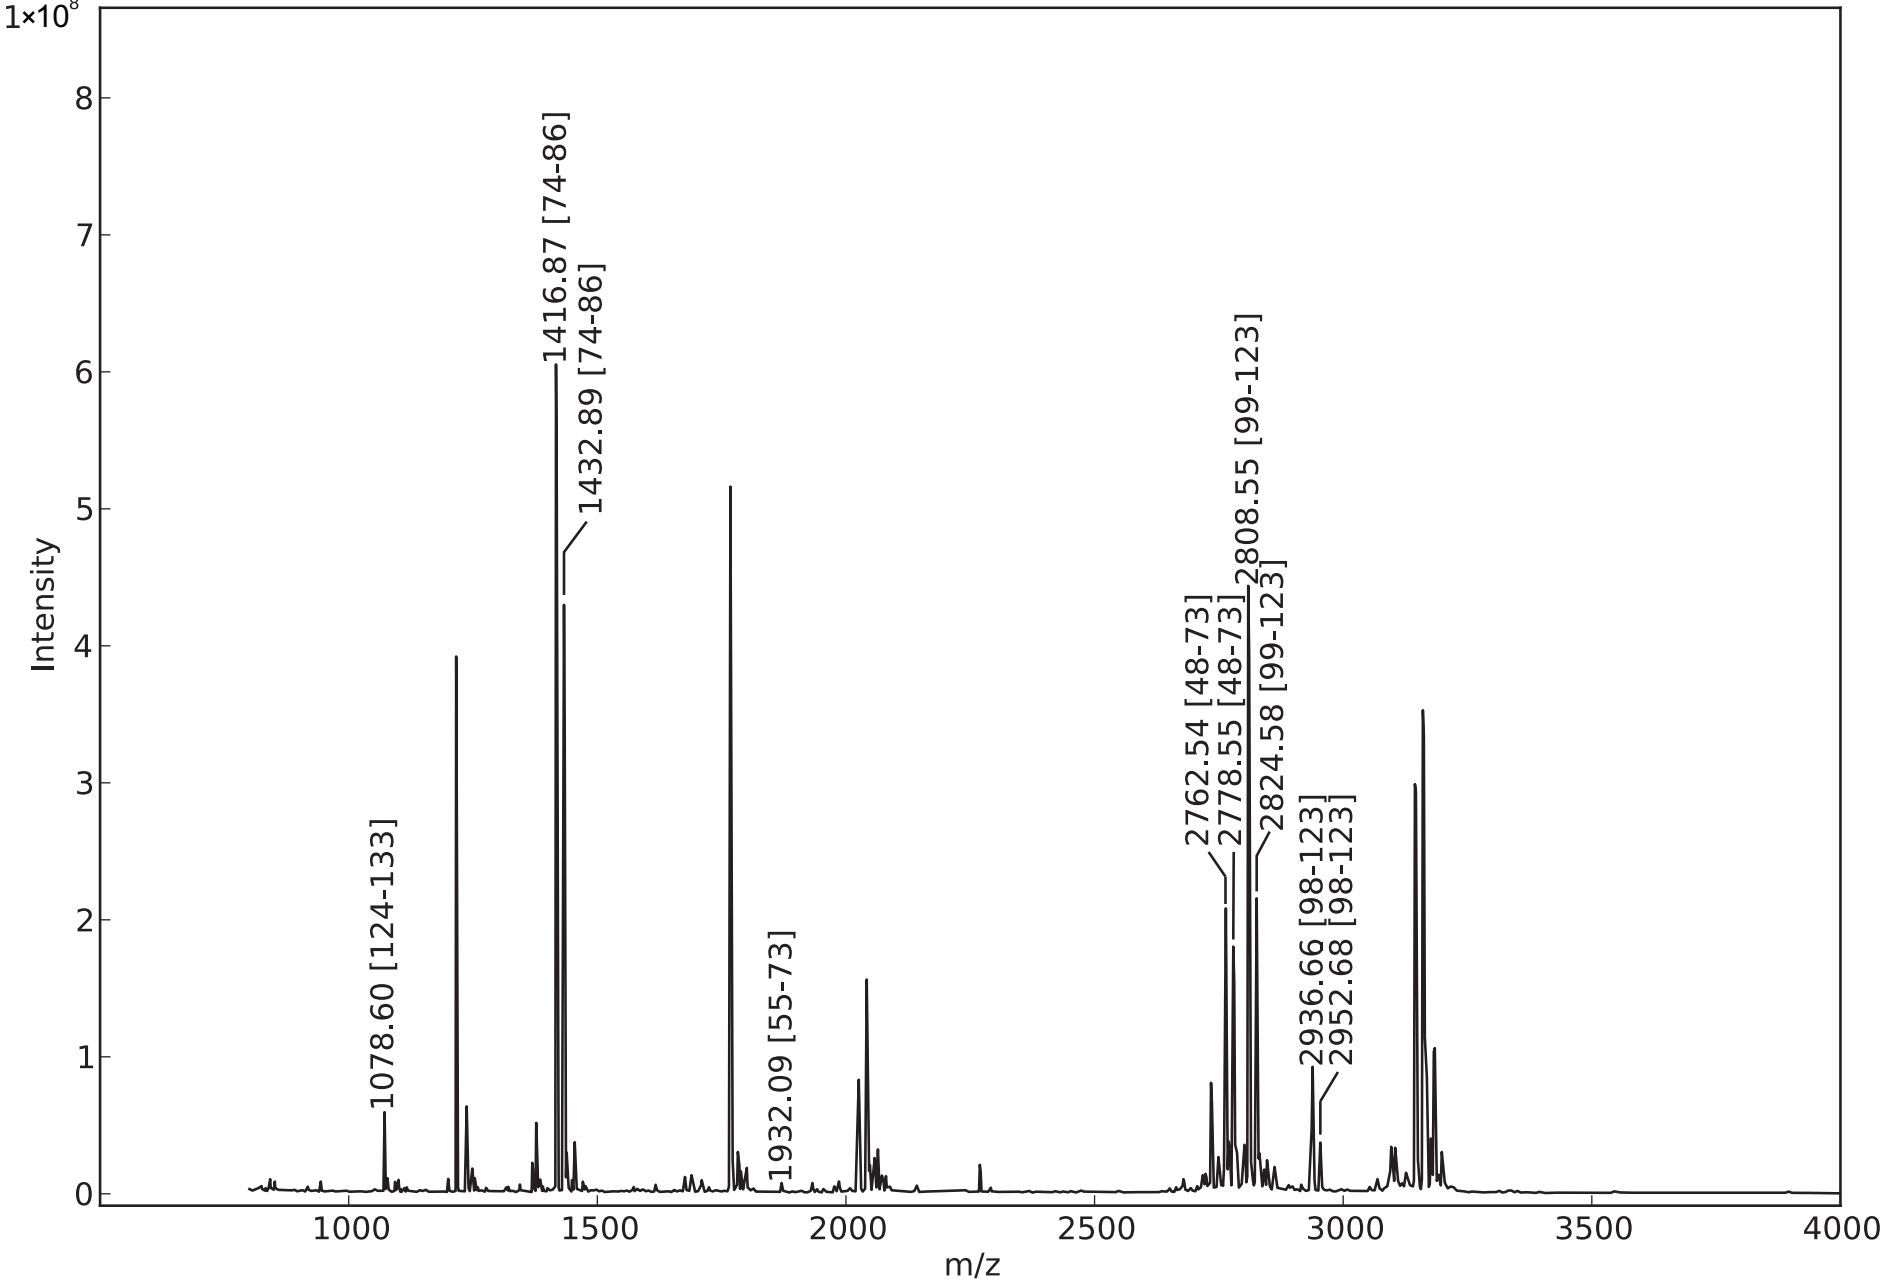

Spot No. 02

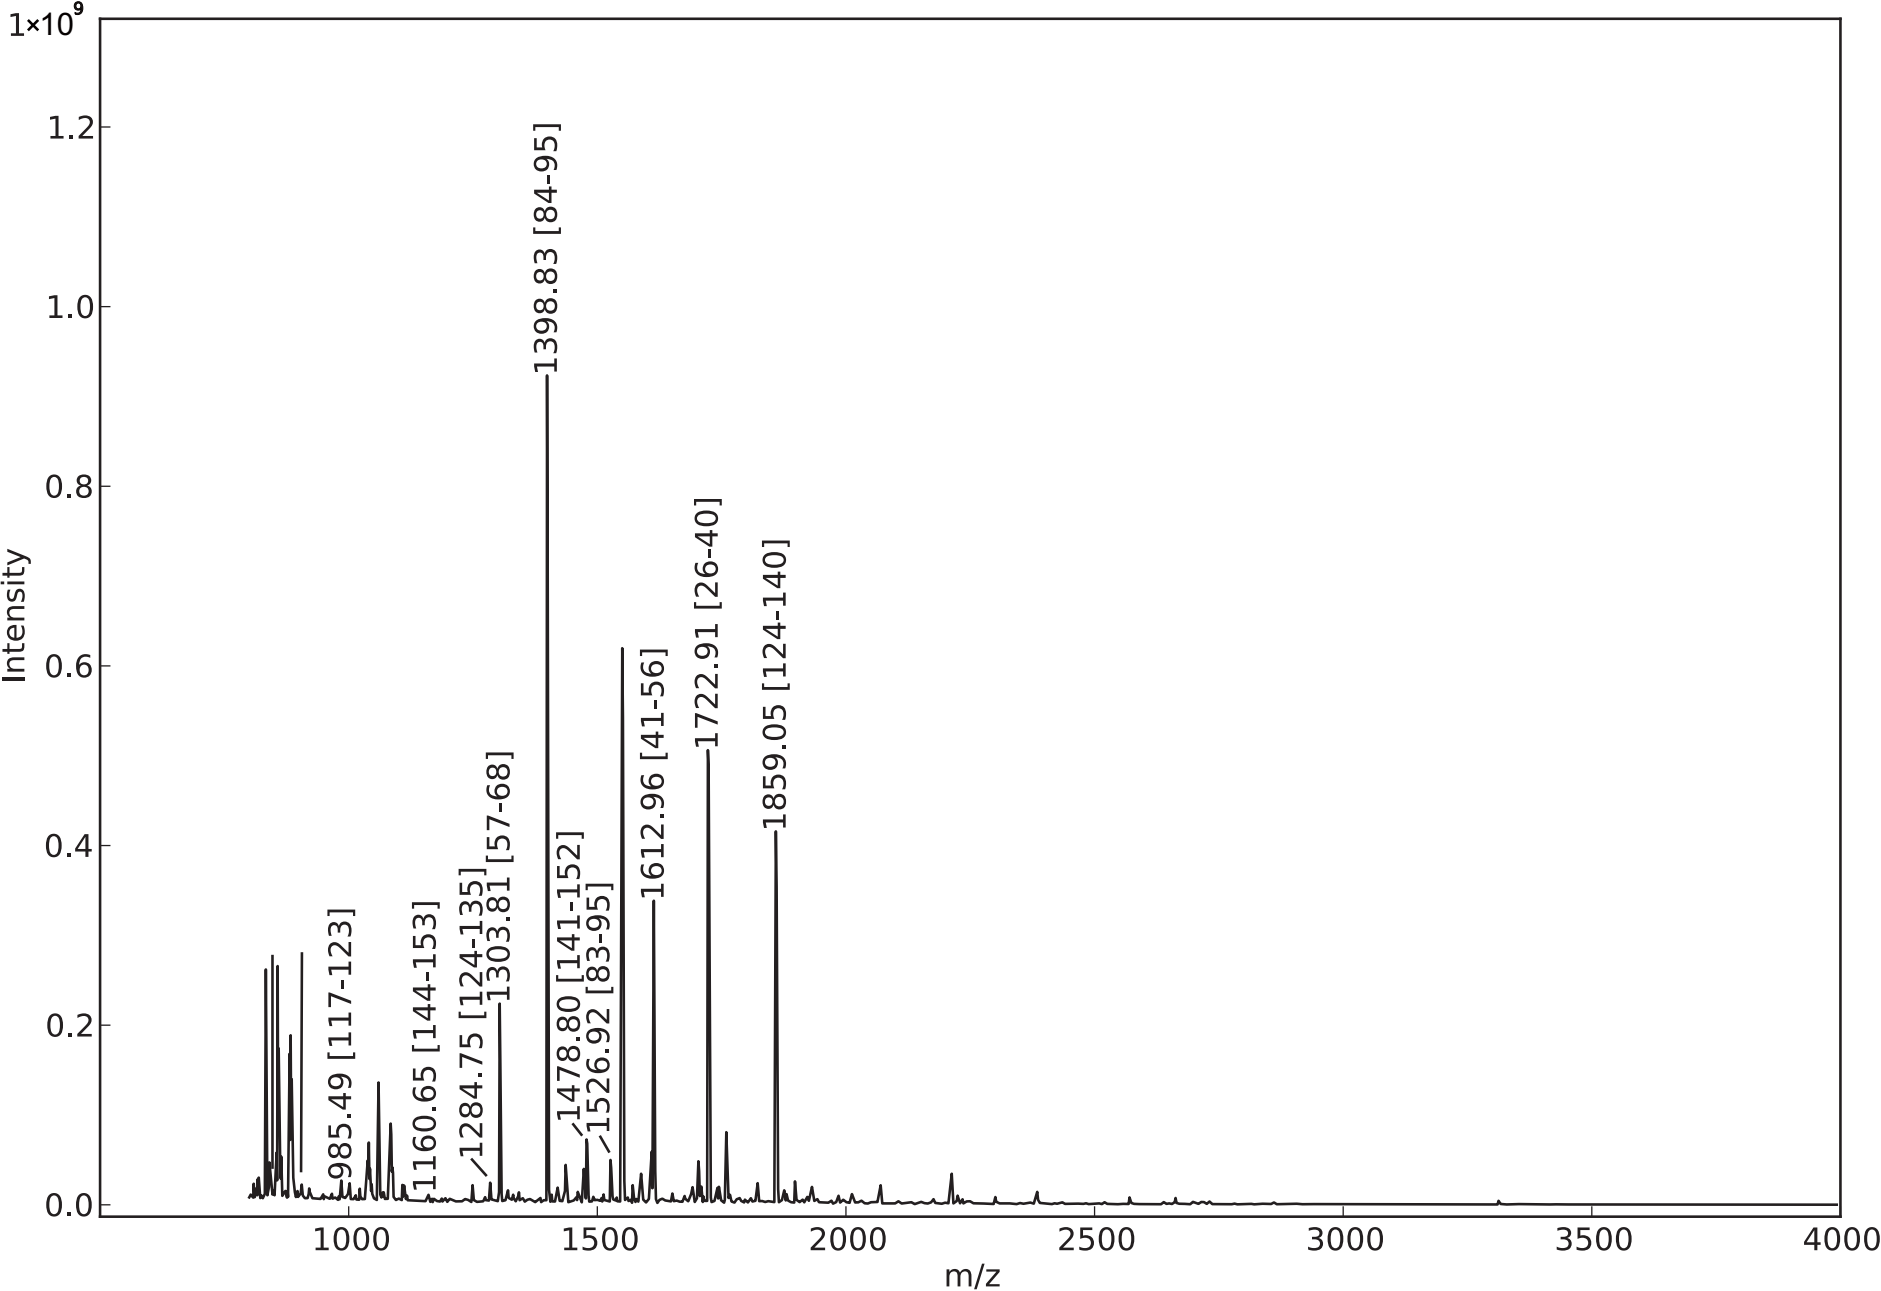

Spot No. 03

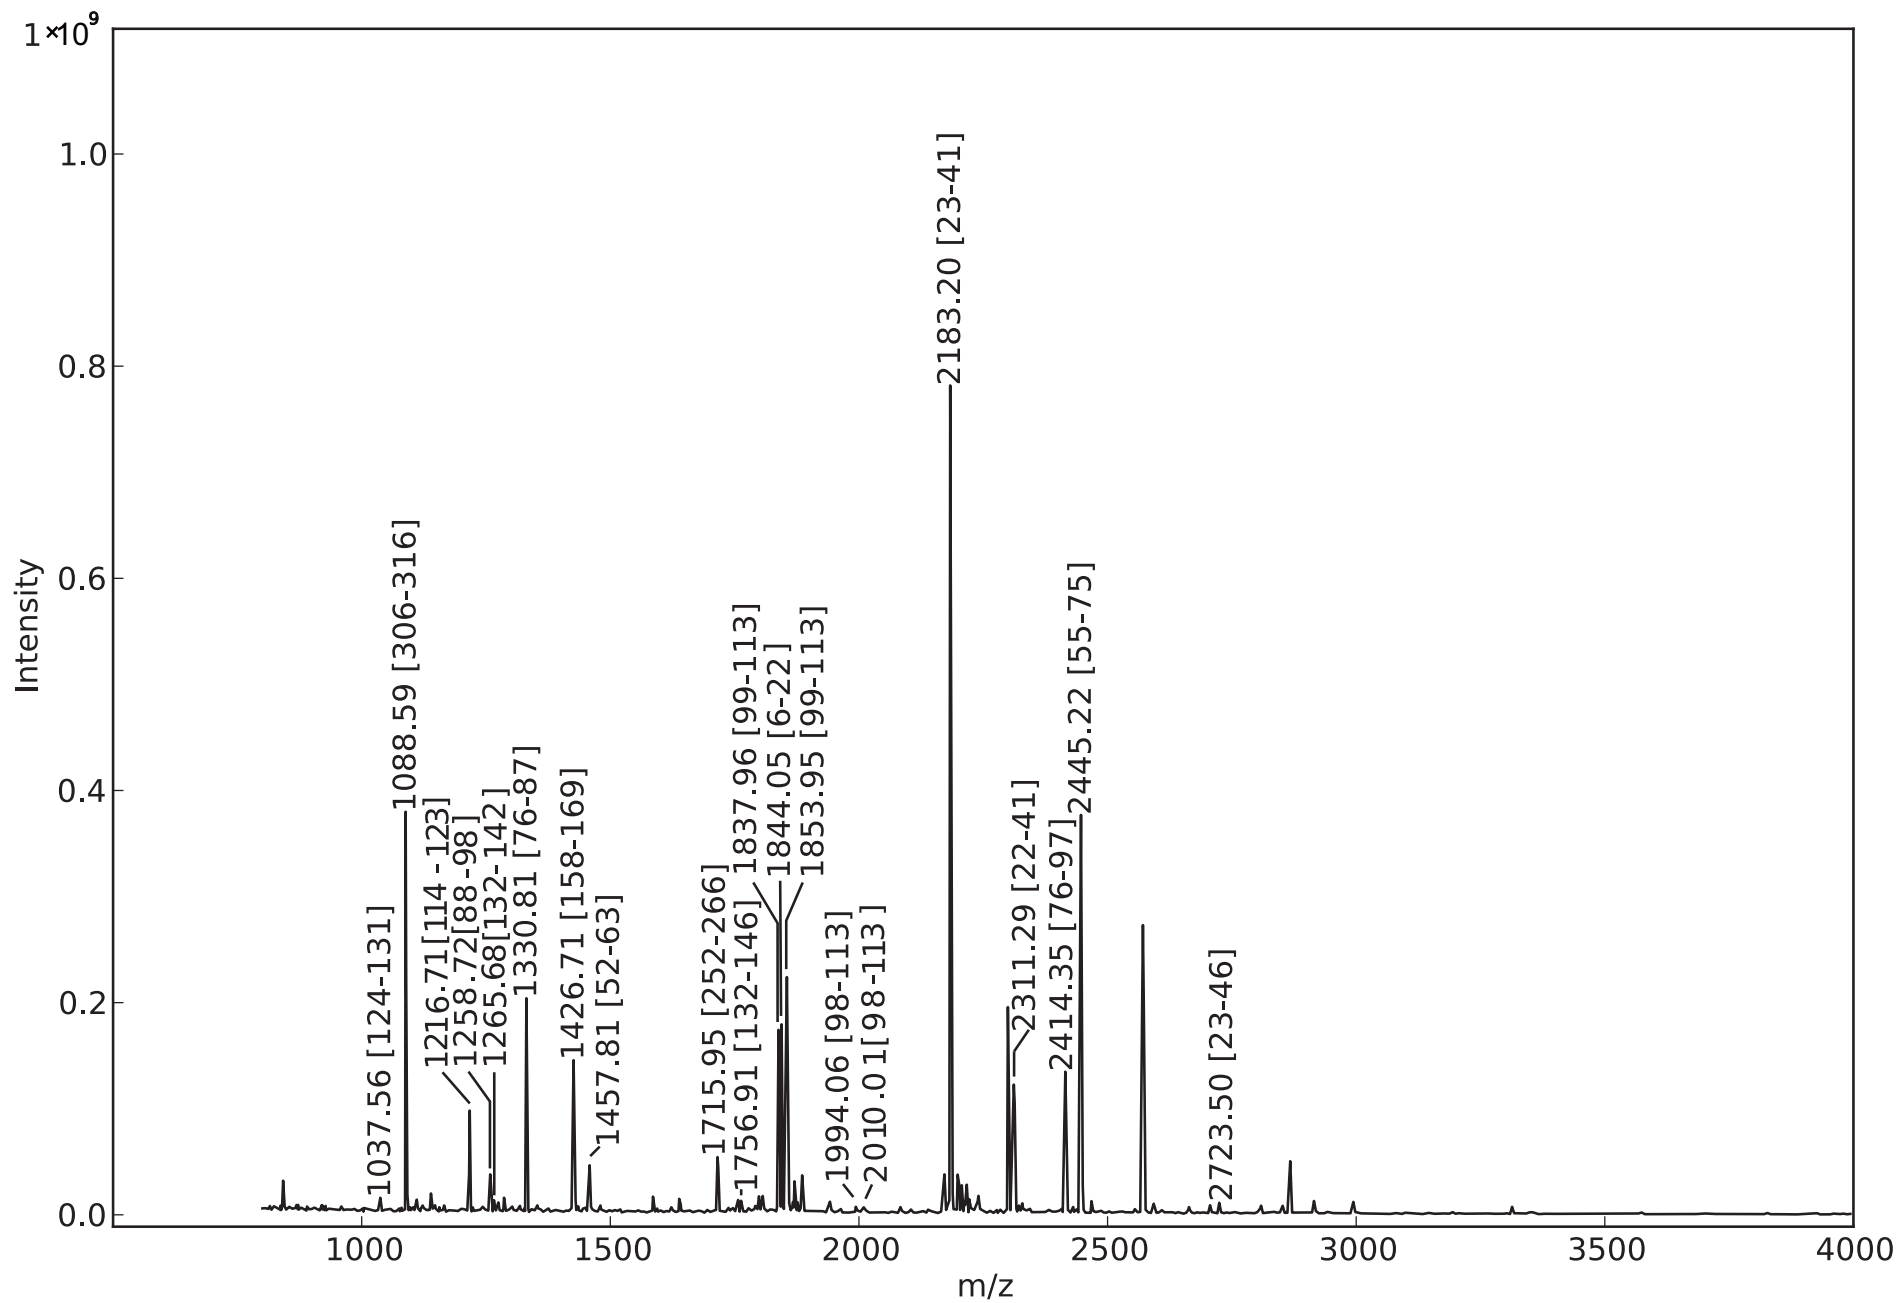

Spot No. 04

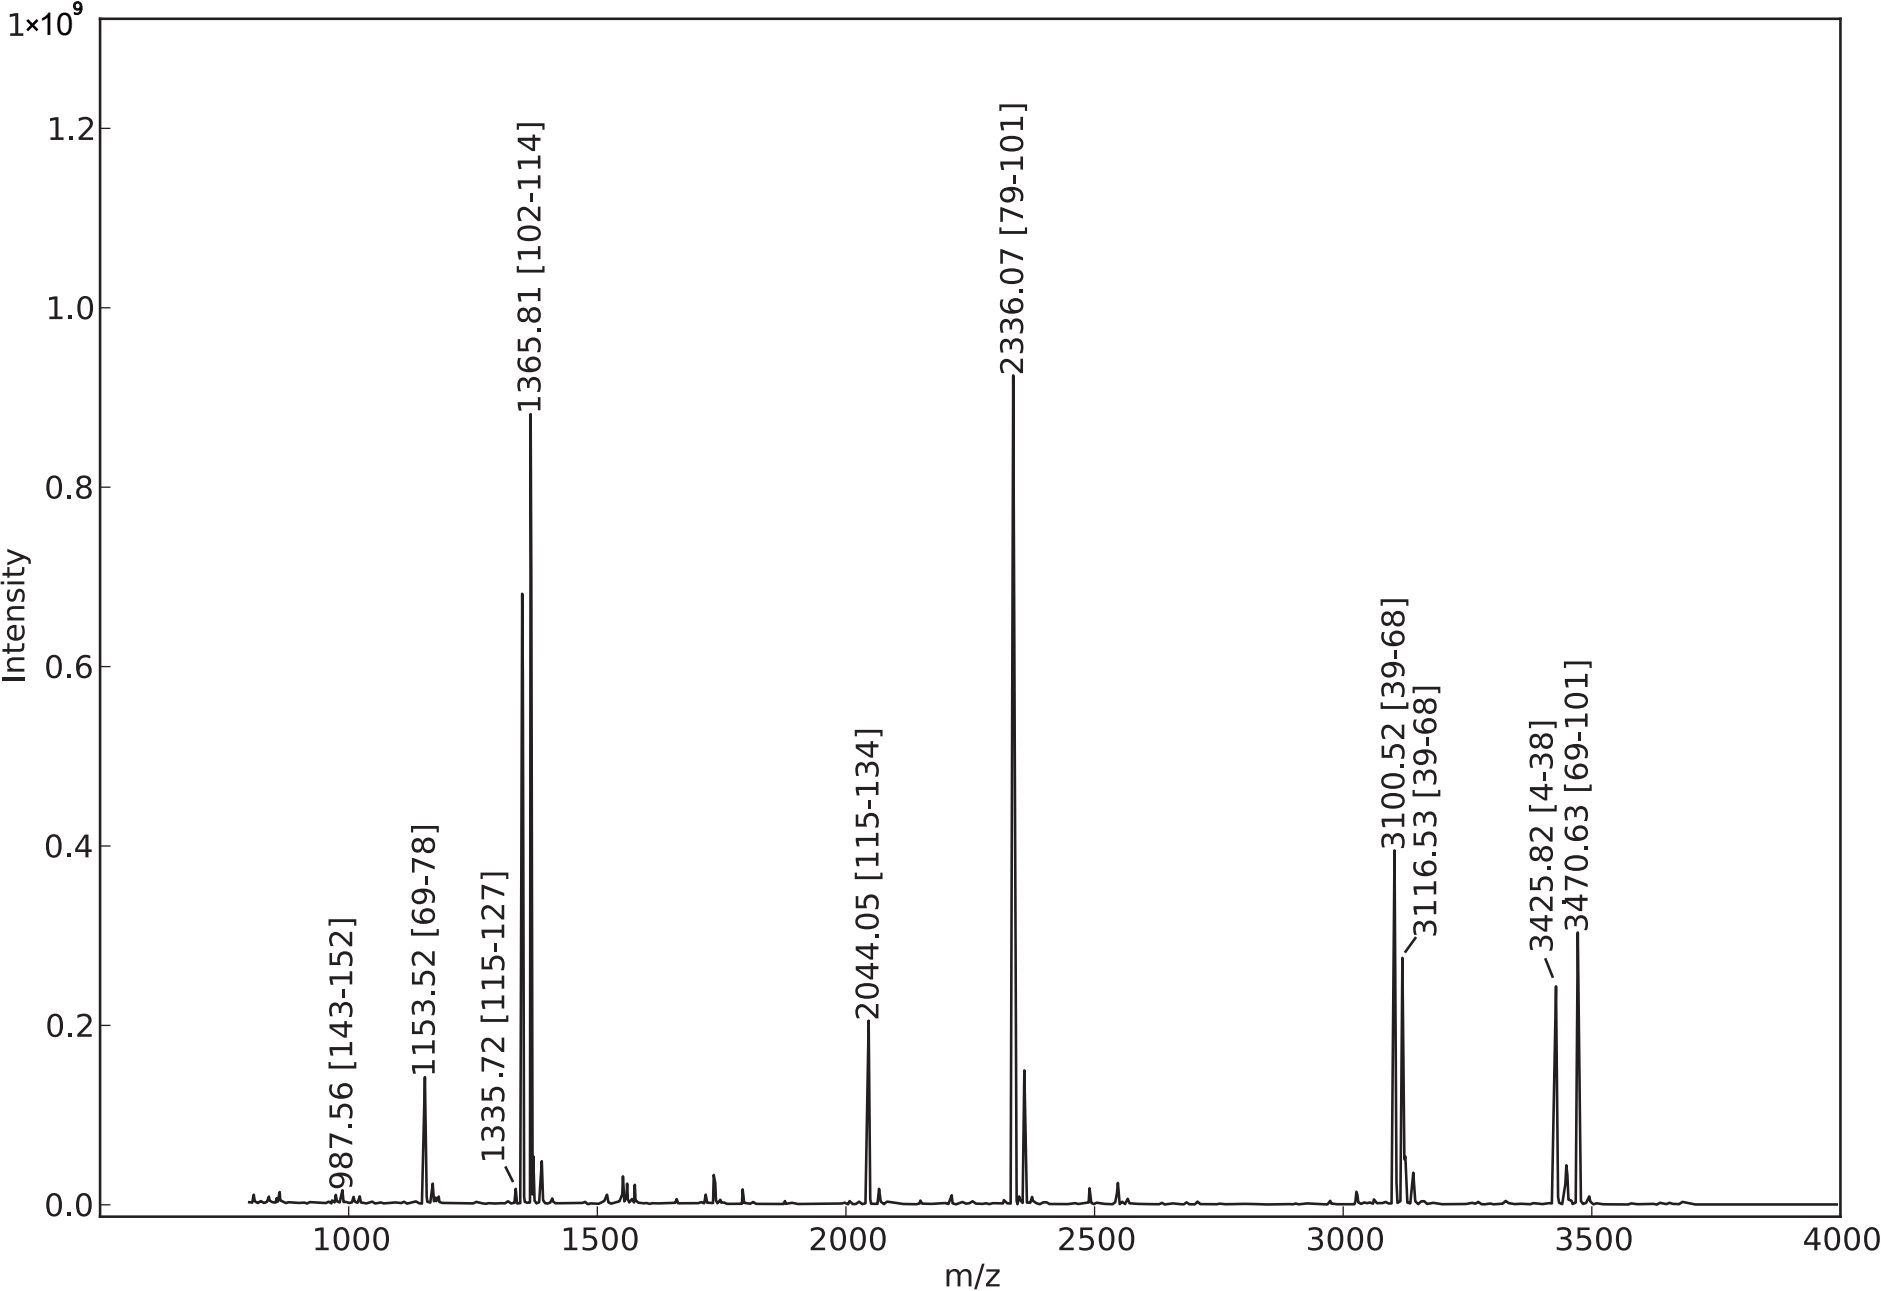

Spot No. 05

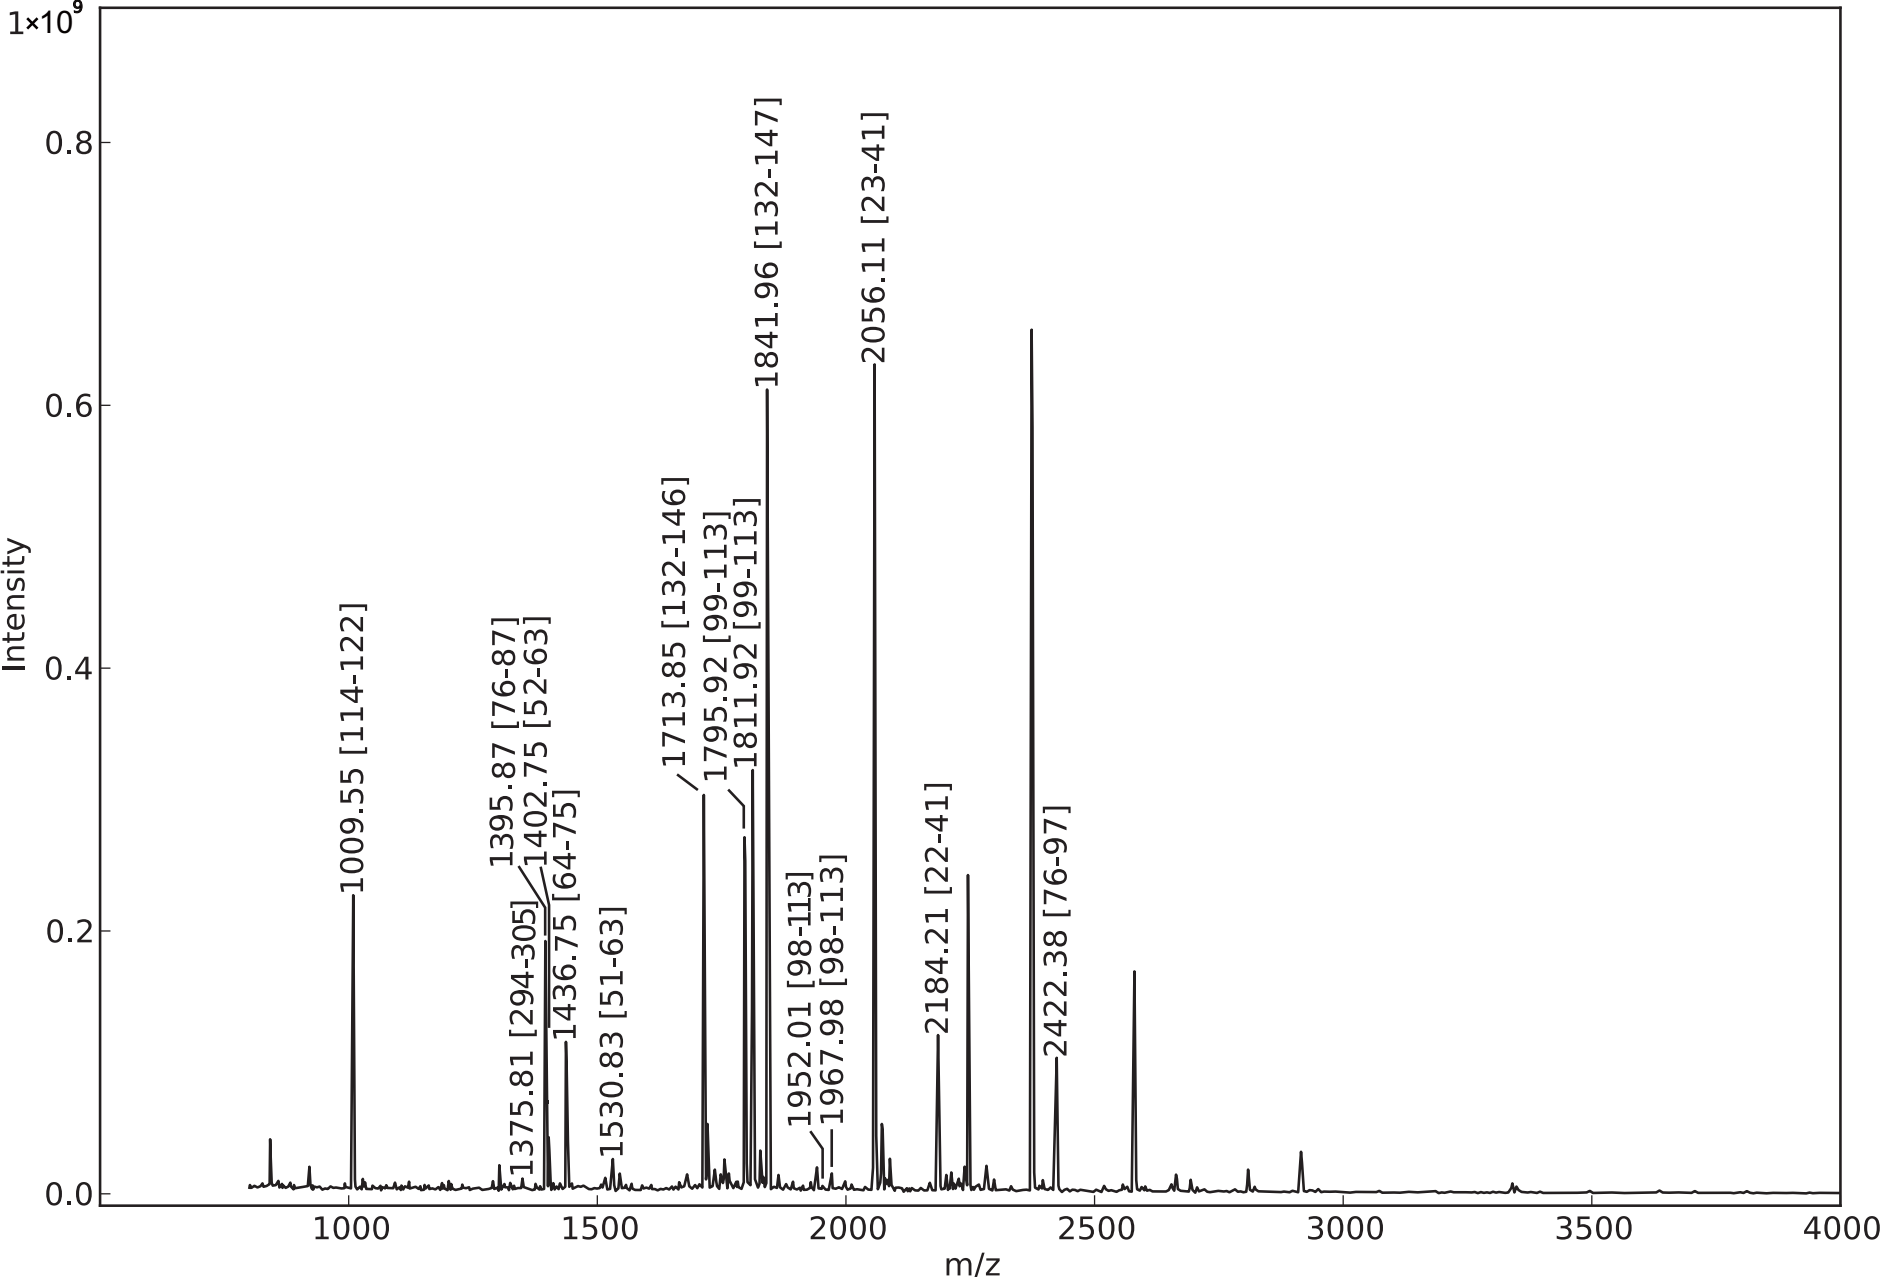

Spot No. 06

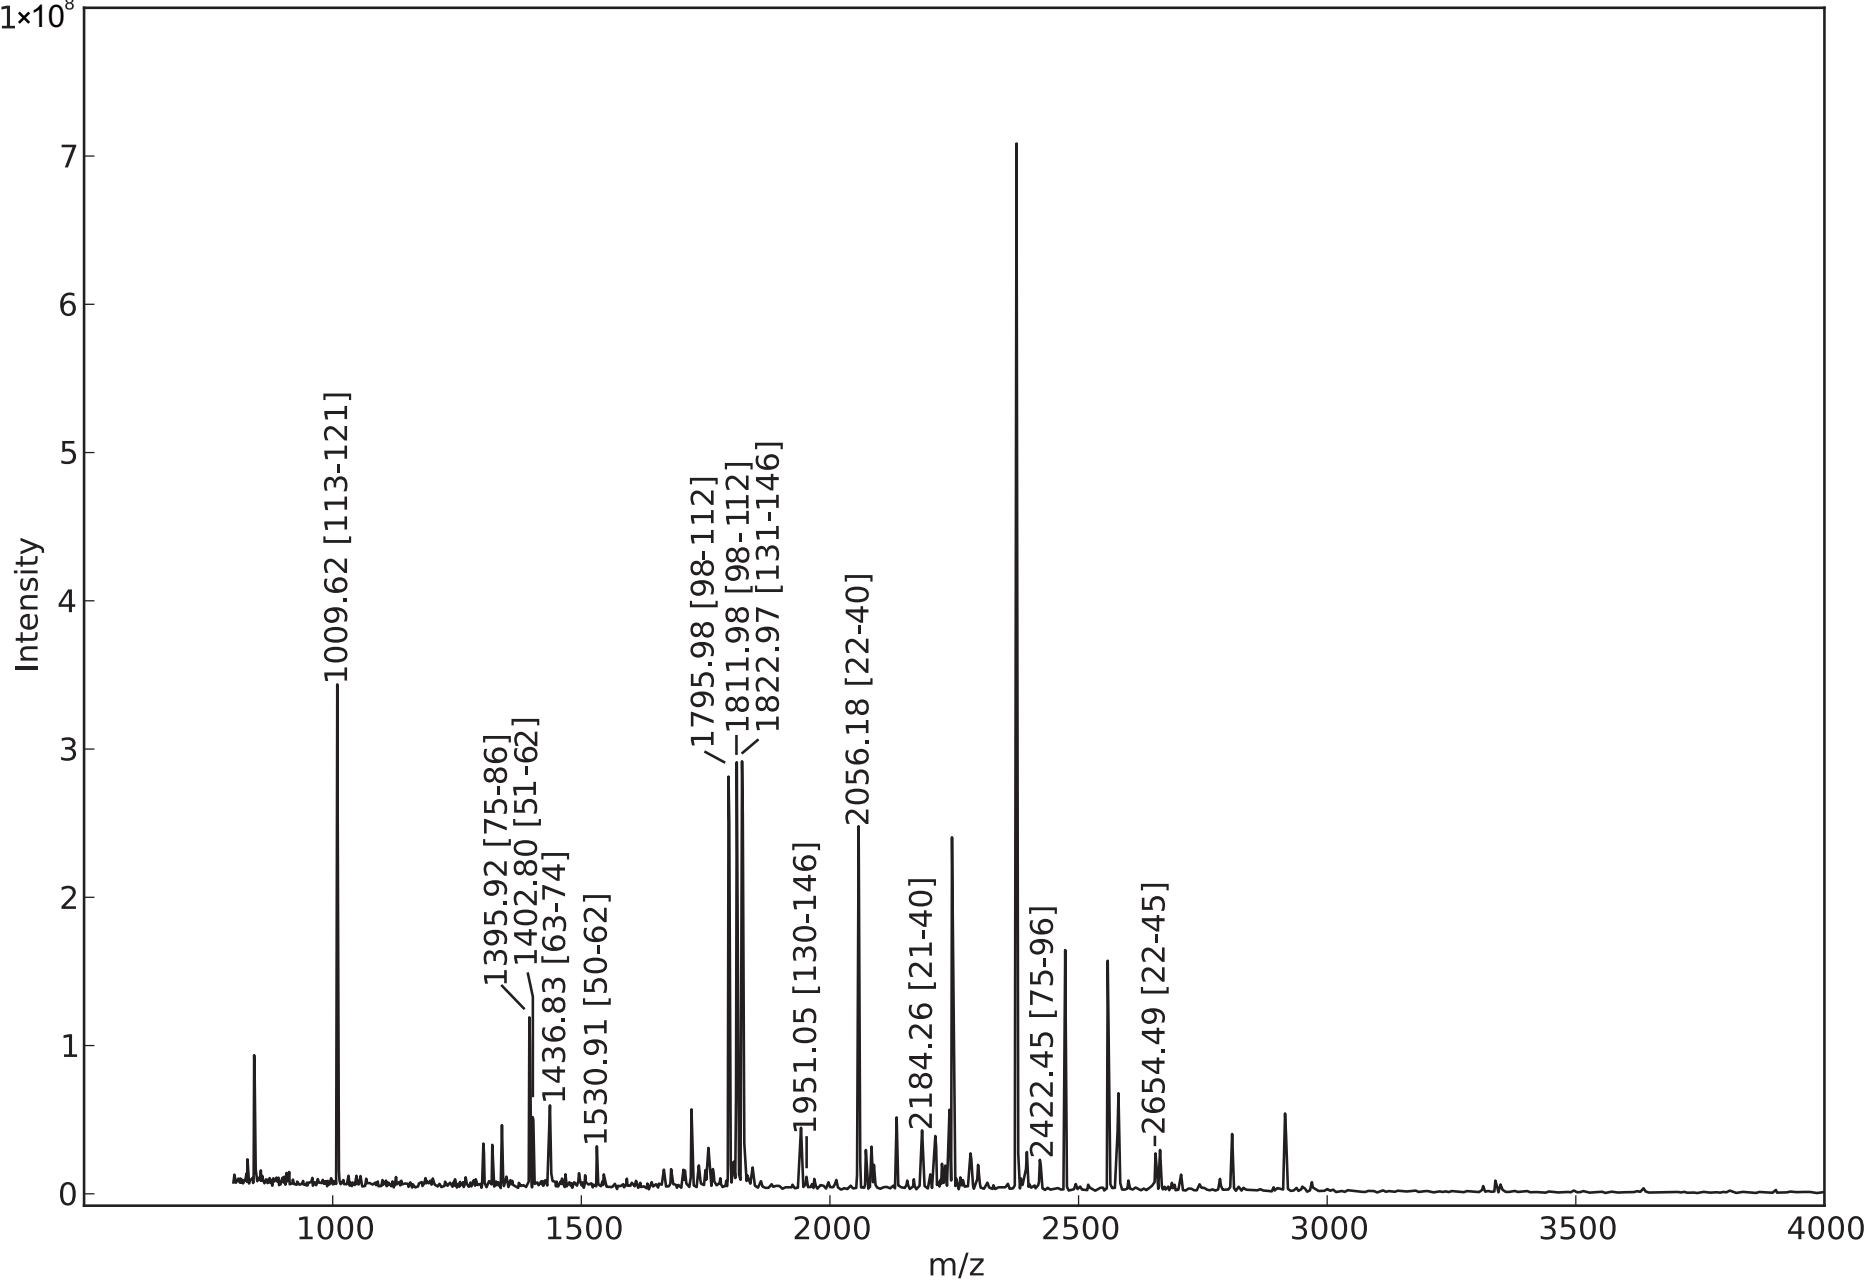



Spot No. 07

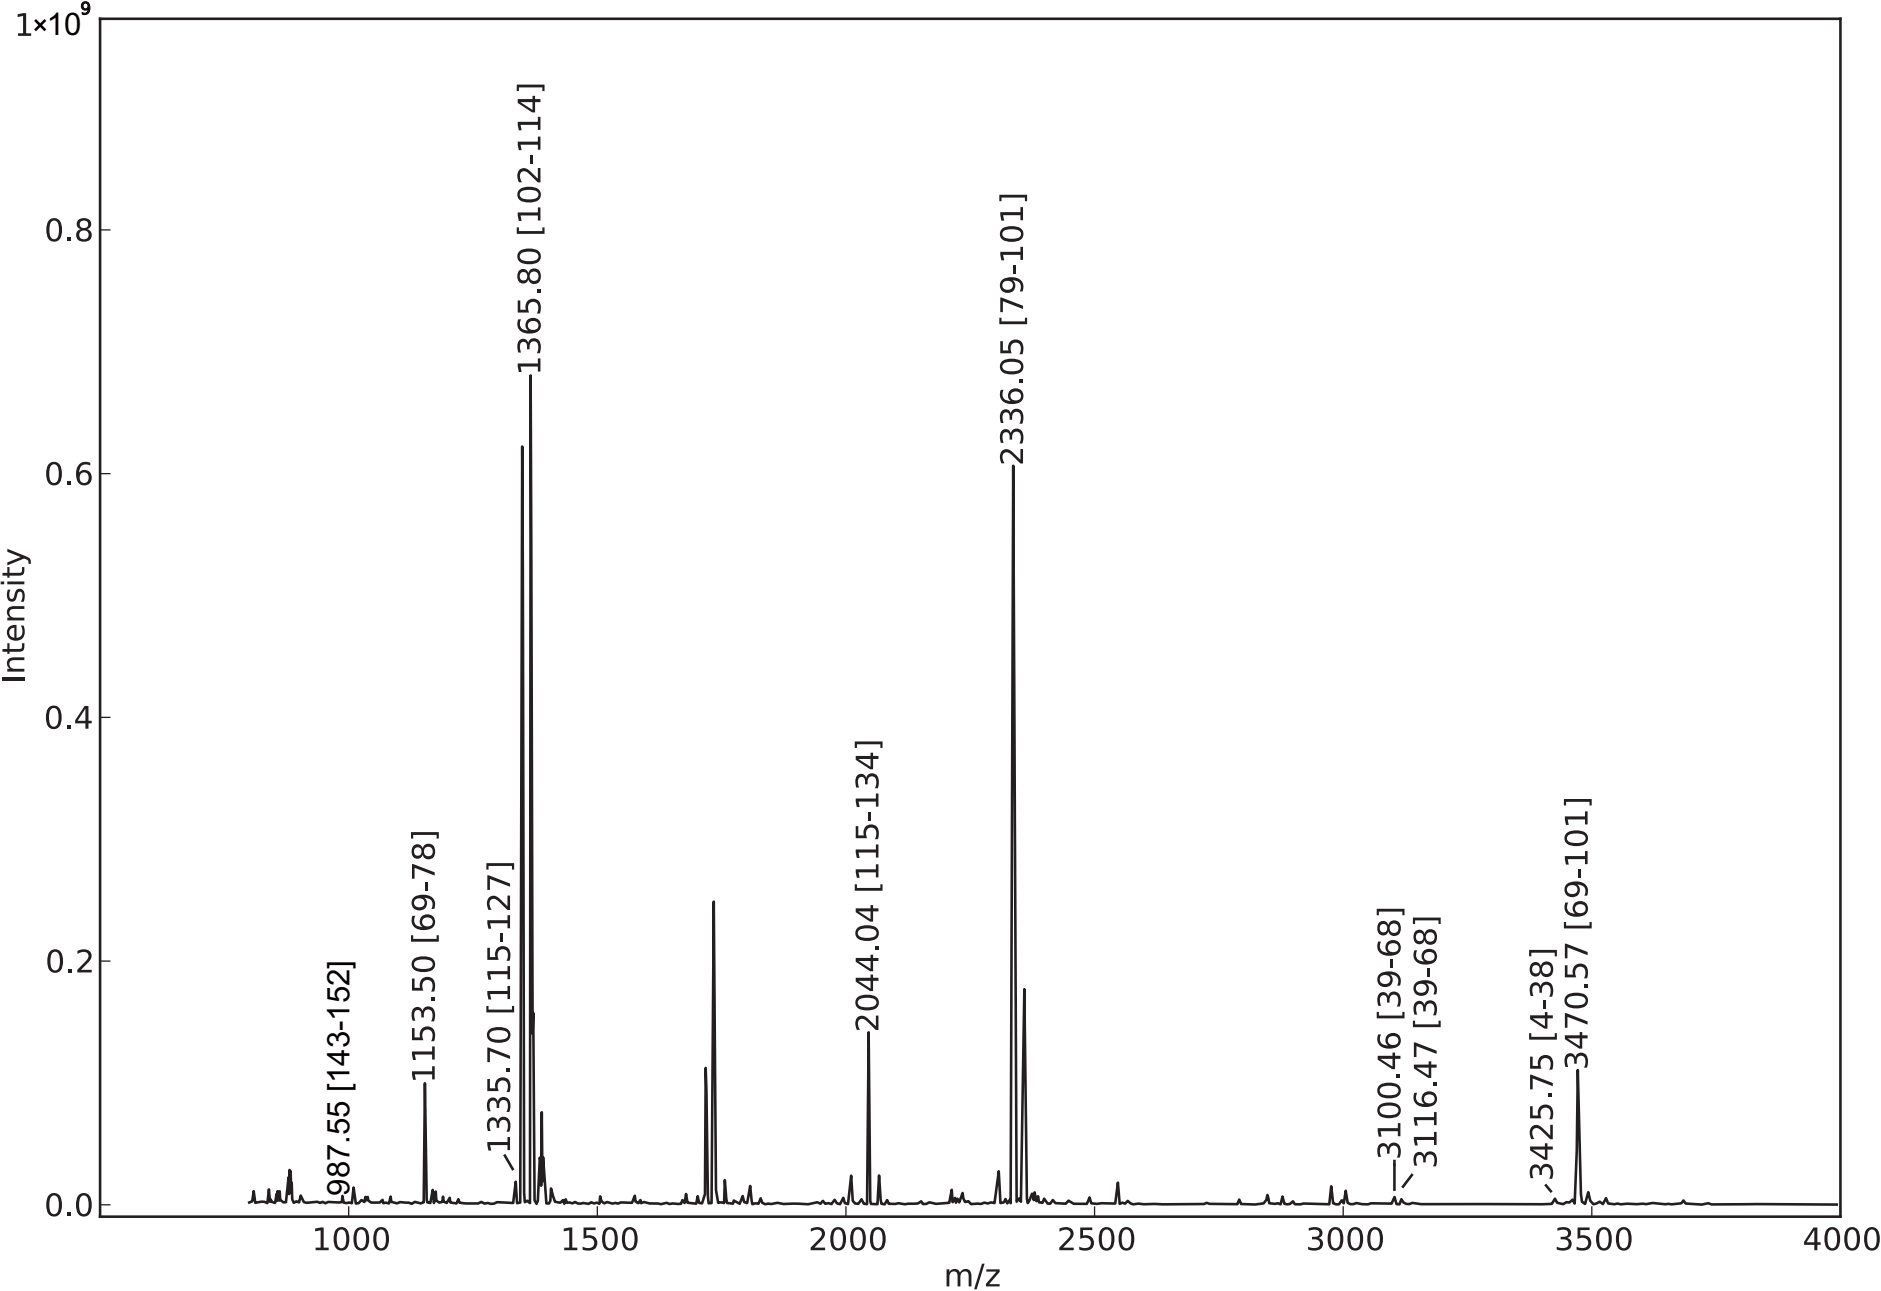

Spot No. 08

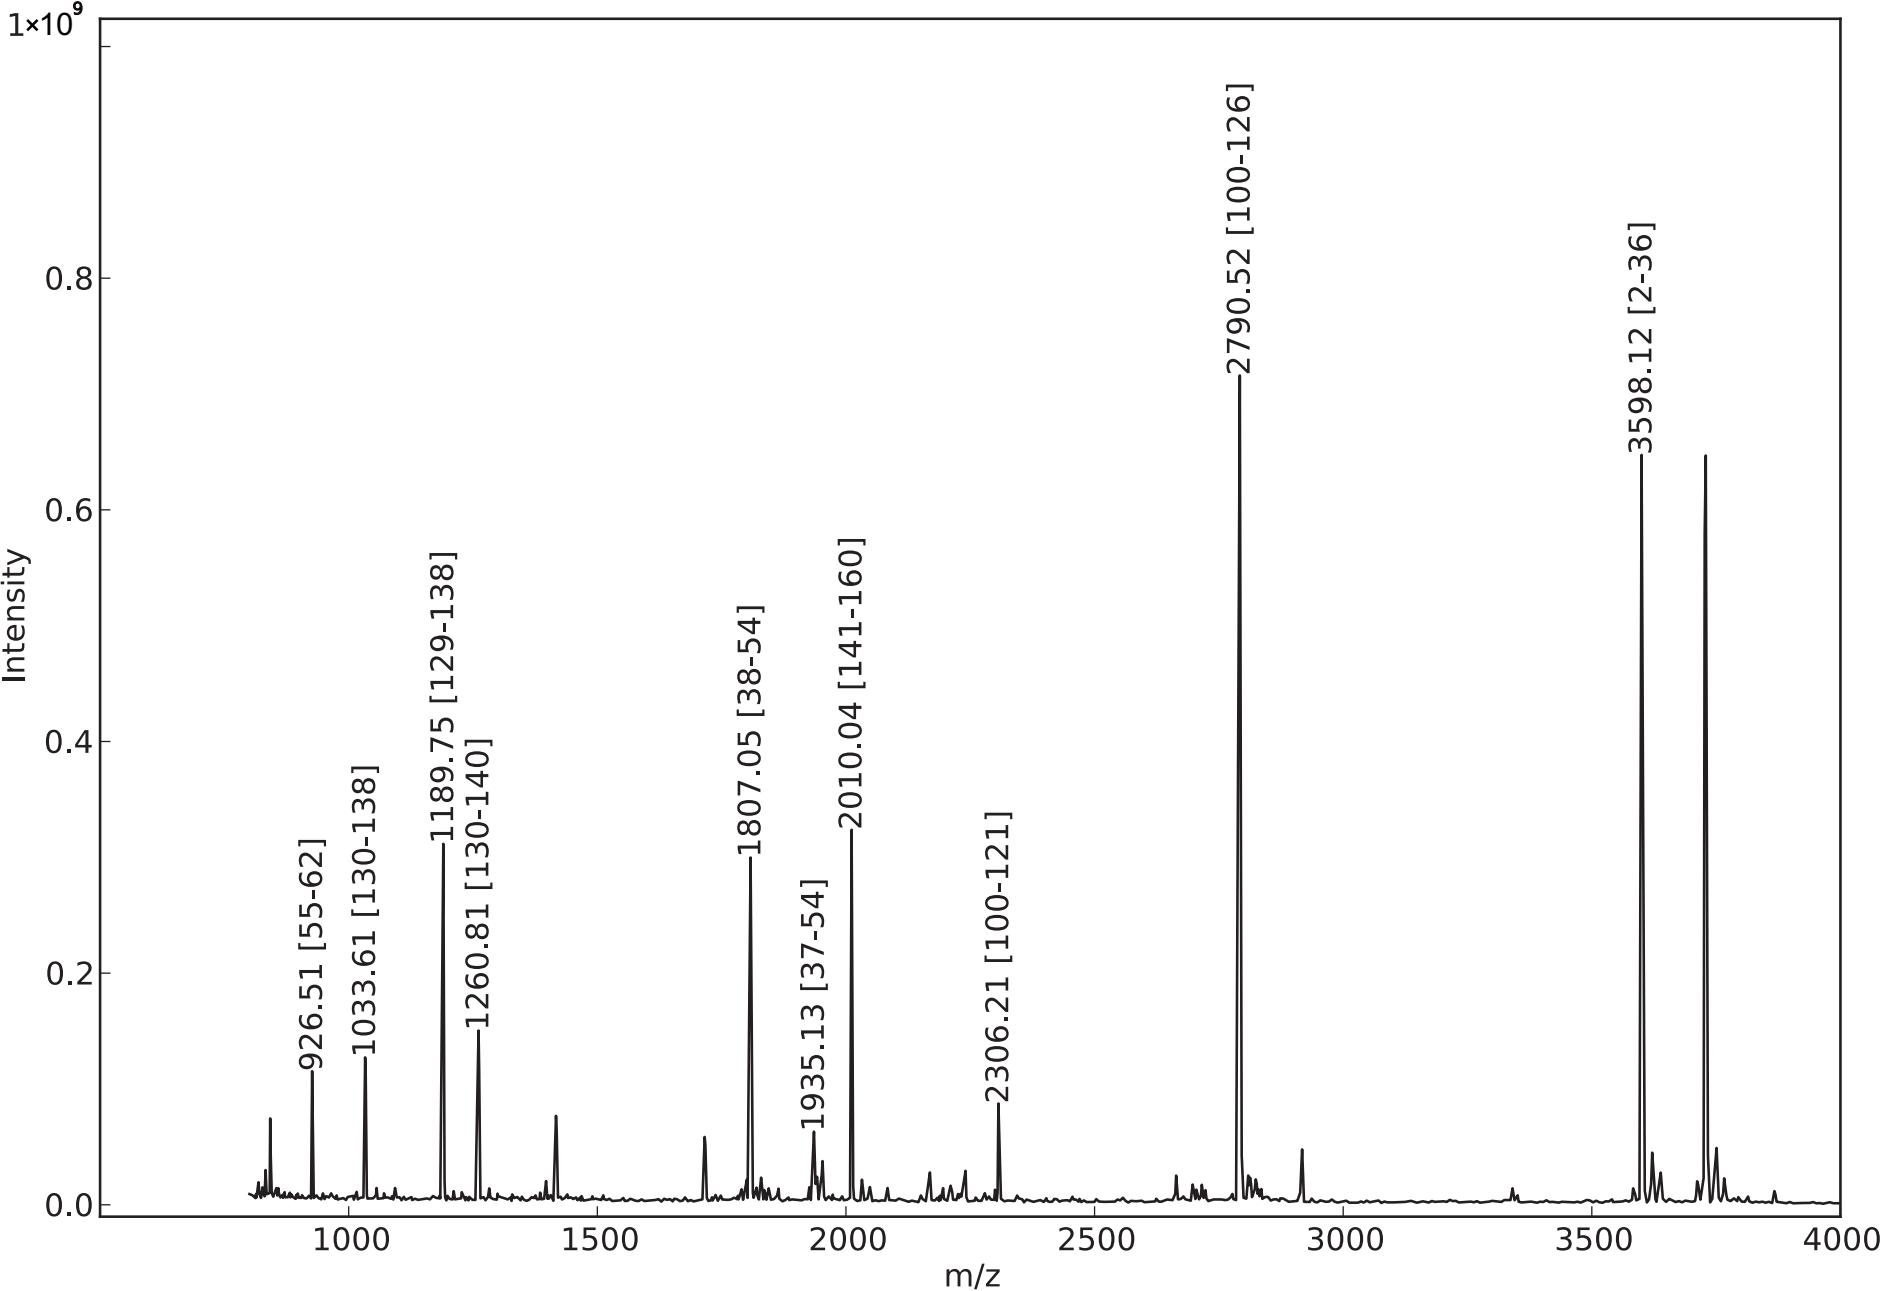

Spot No. 09

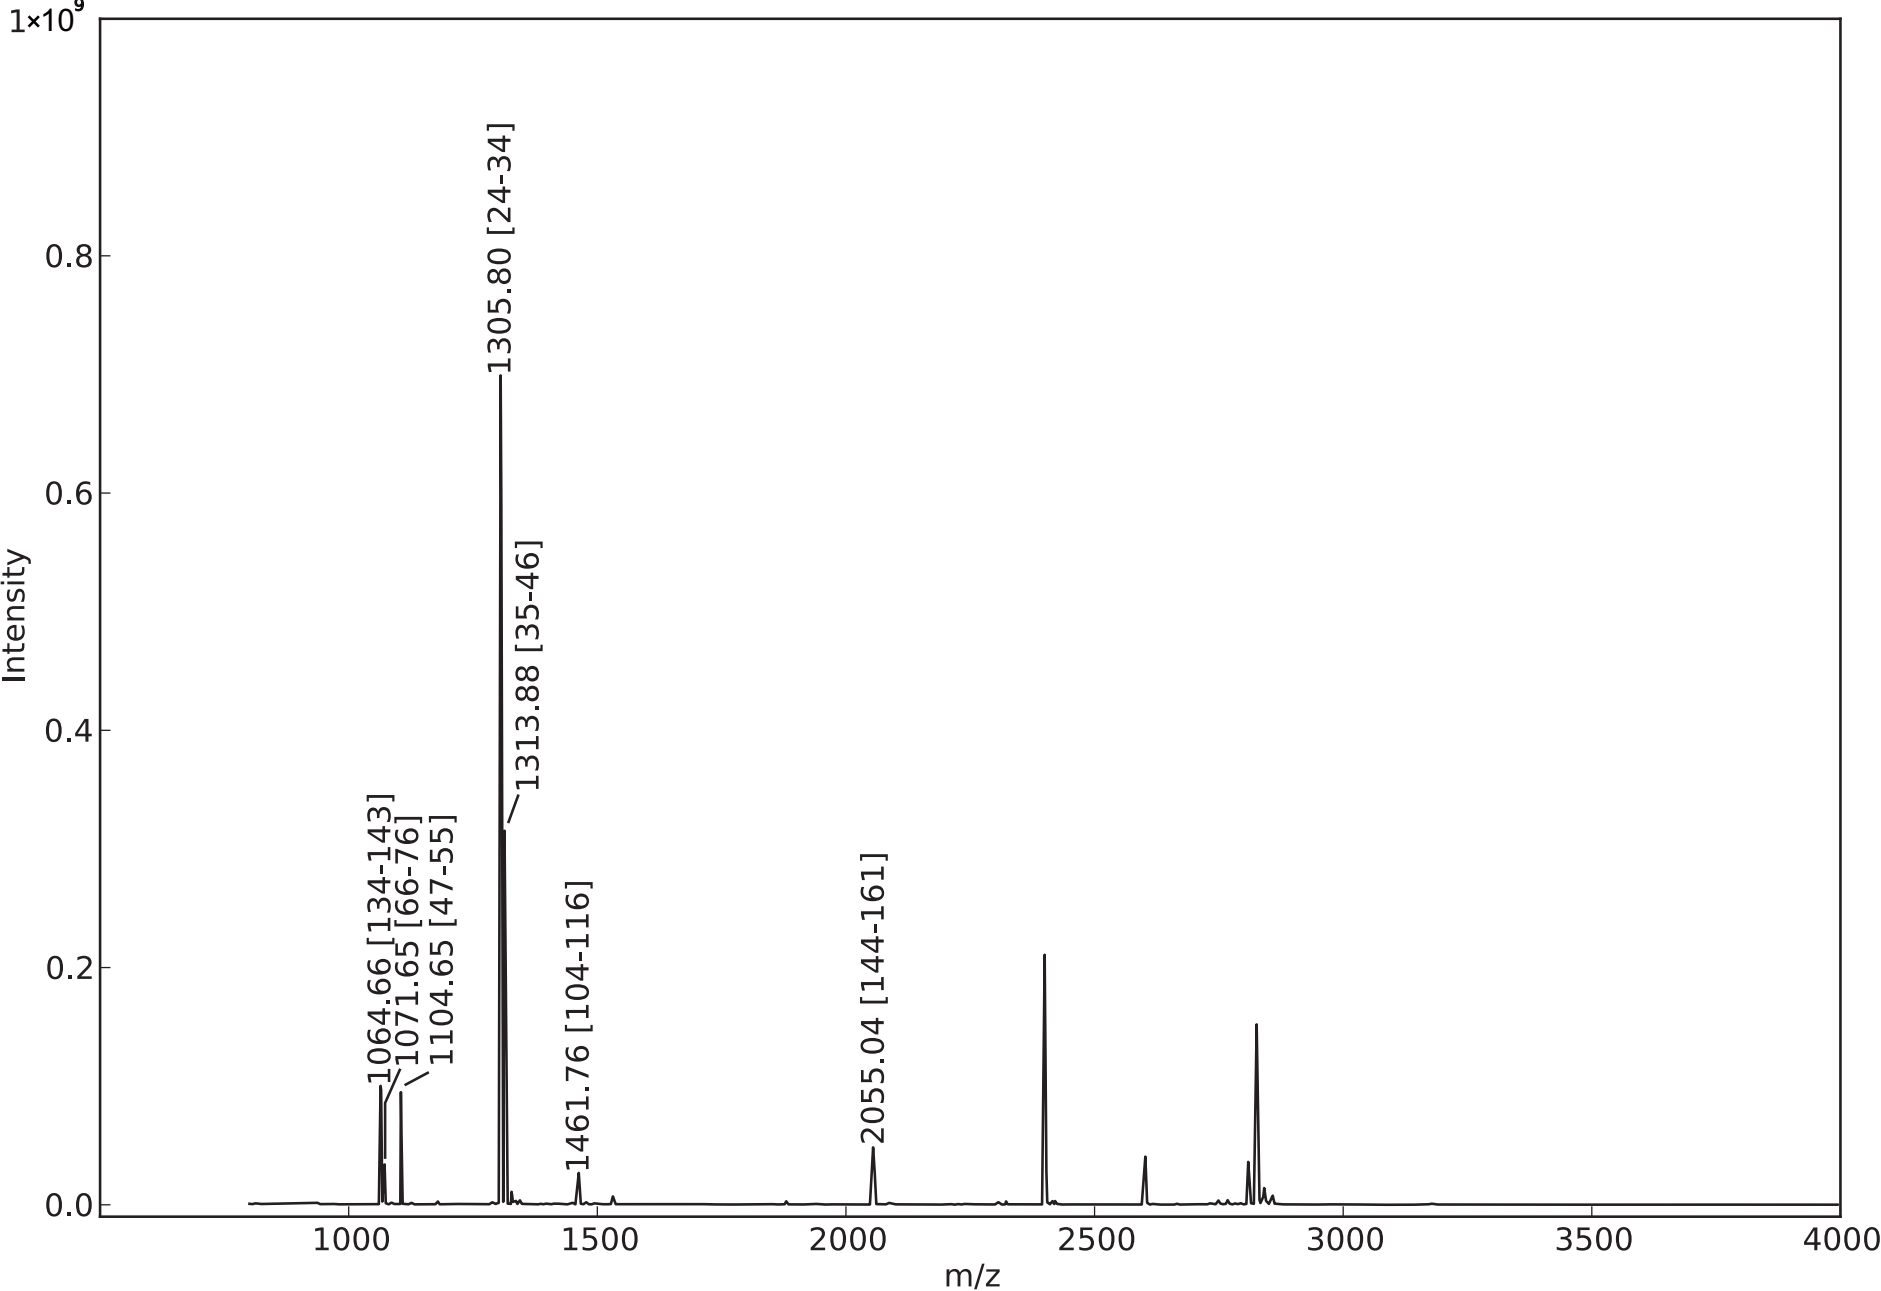

Spot No. 10

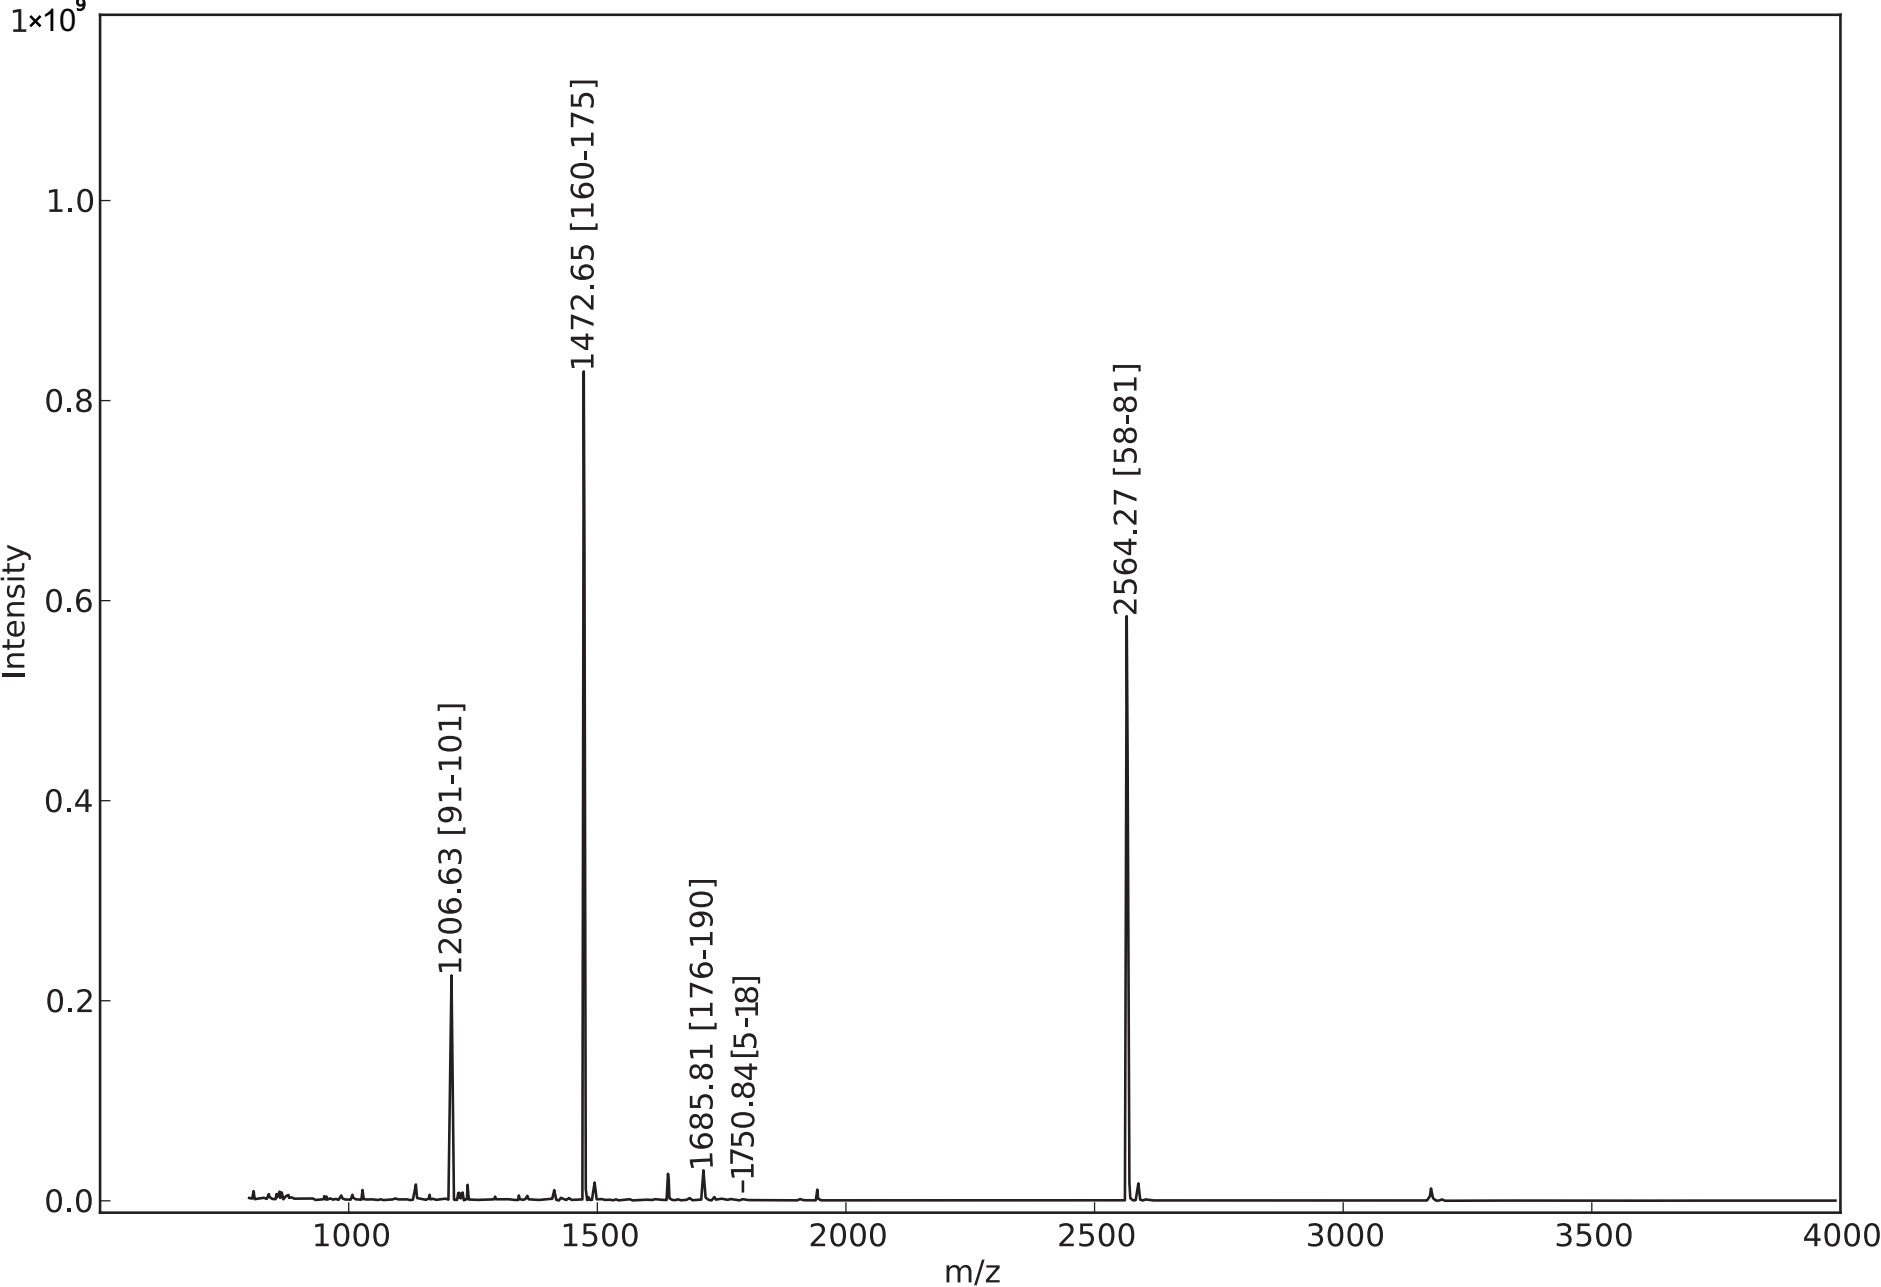

Spot No. 11

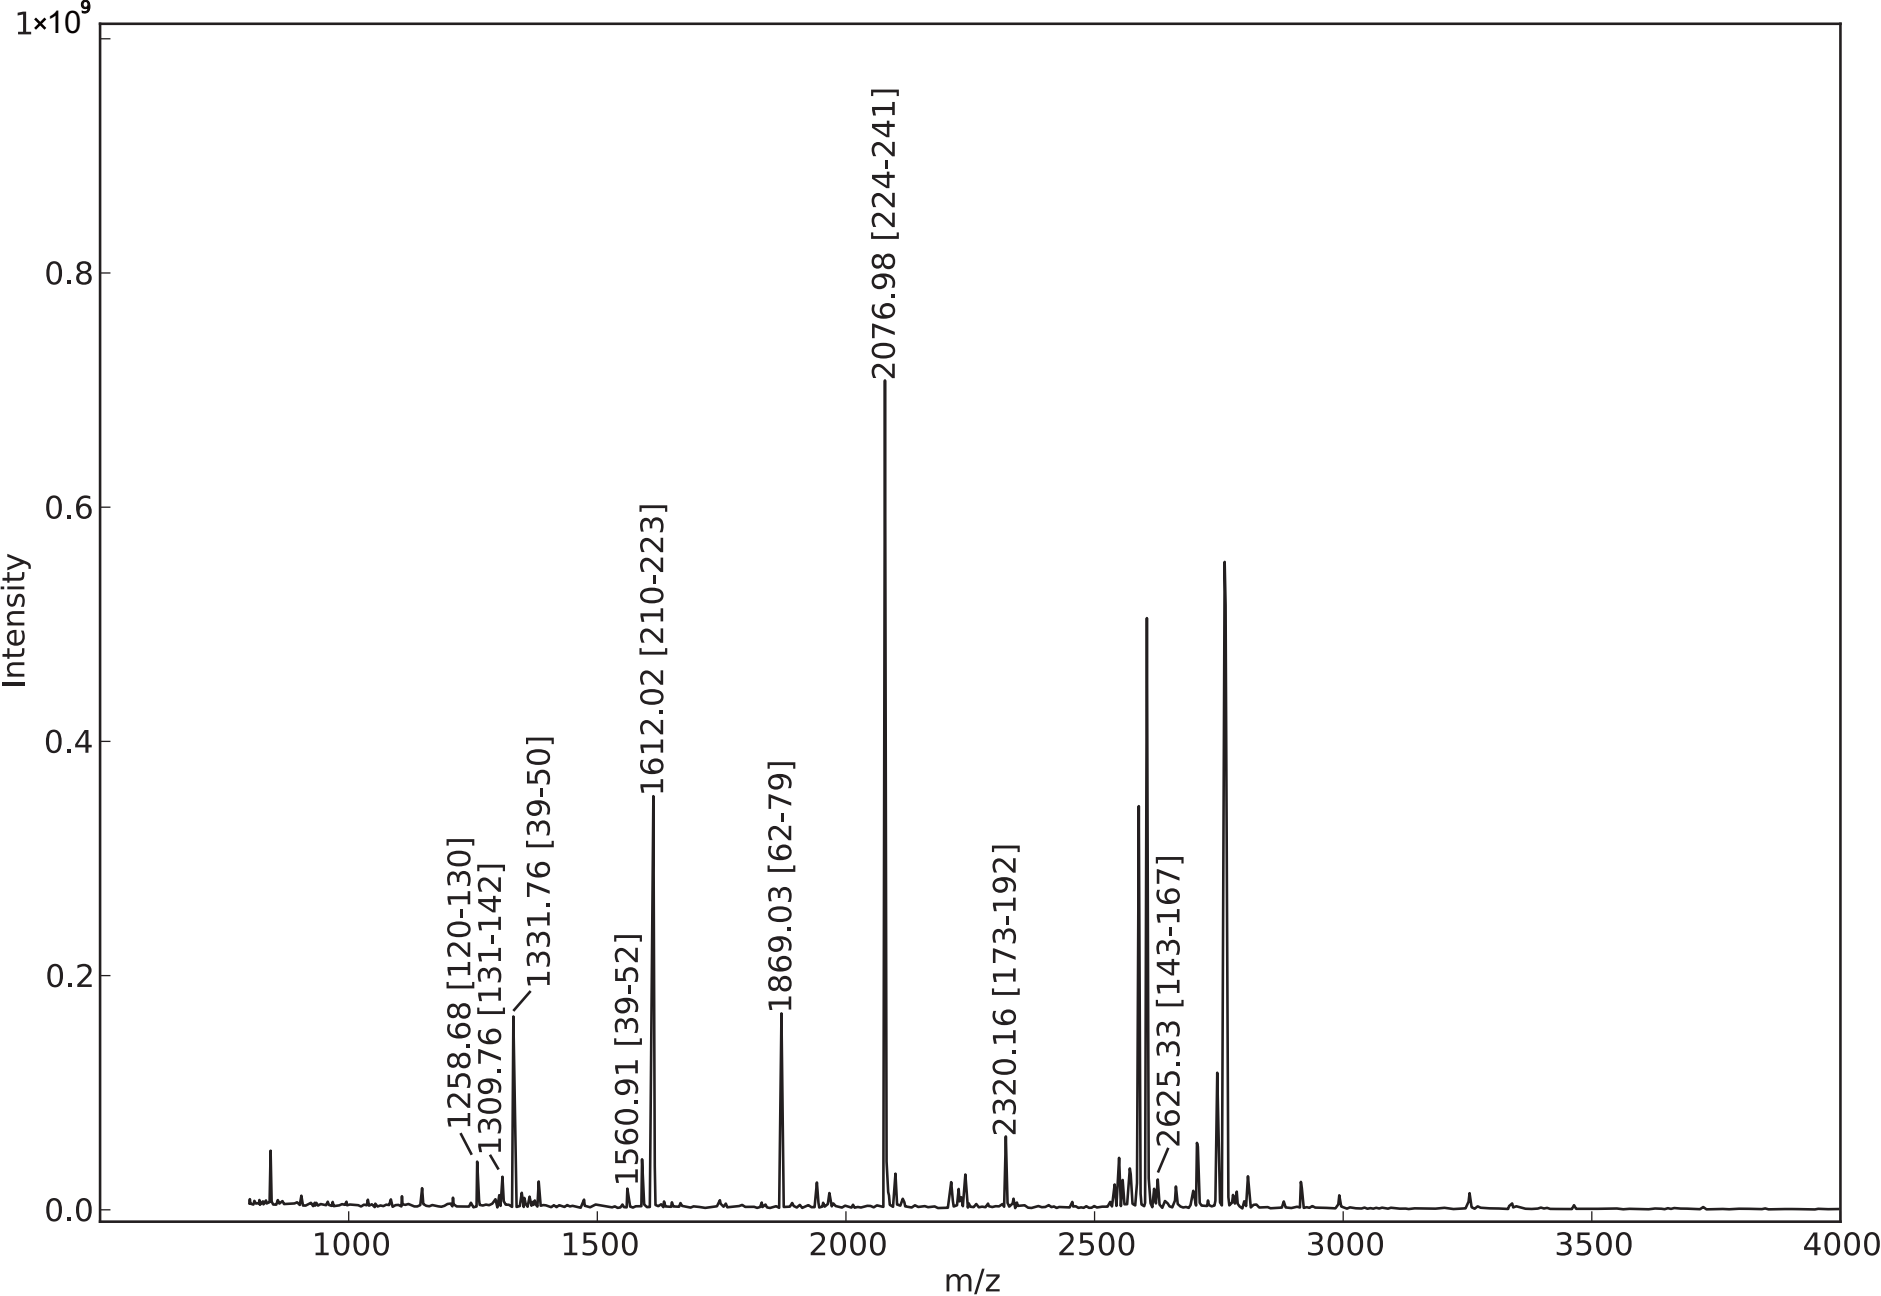

Spot No. 12

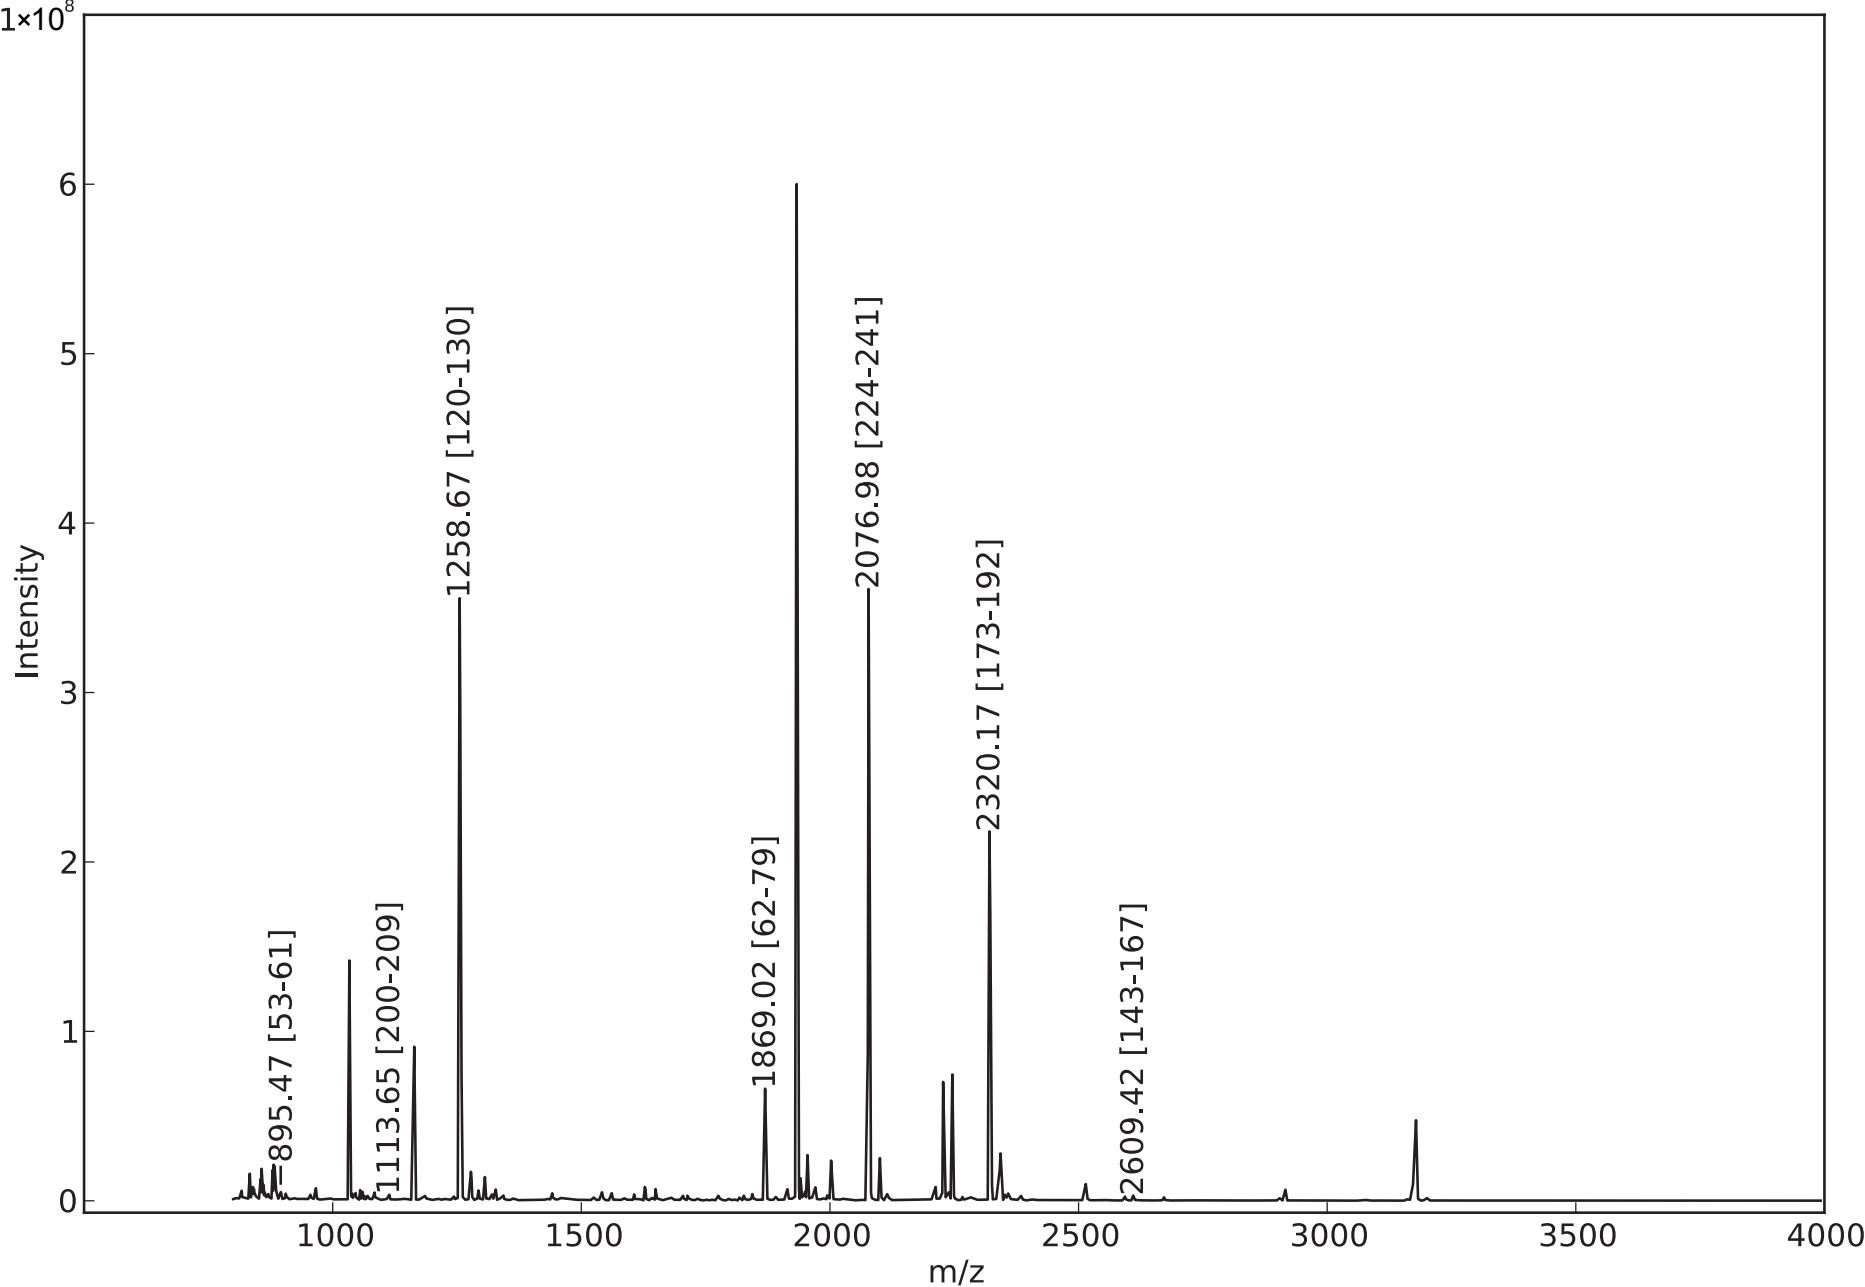

Spot No. 13

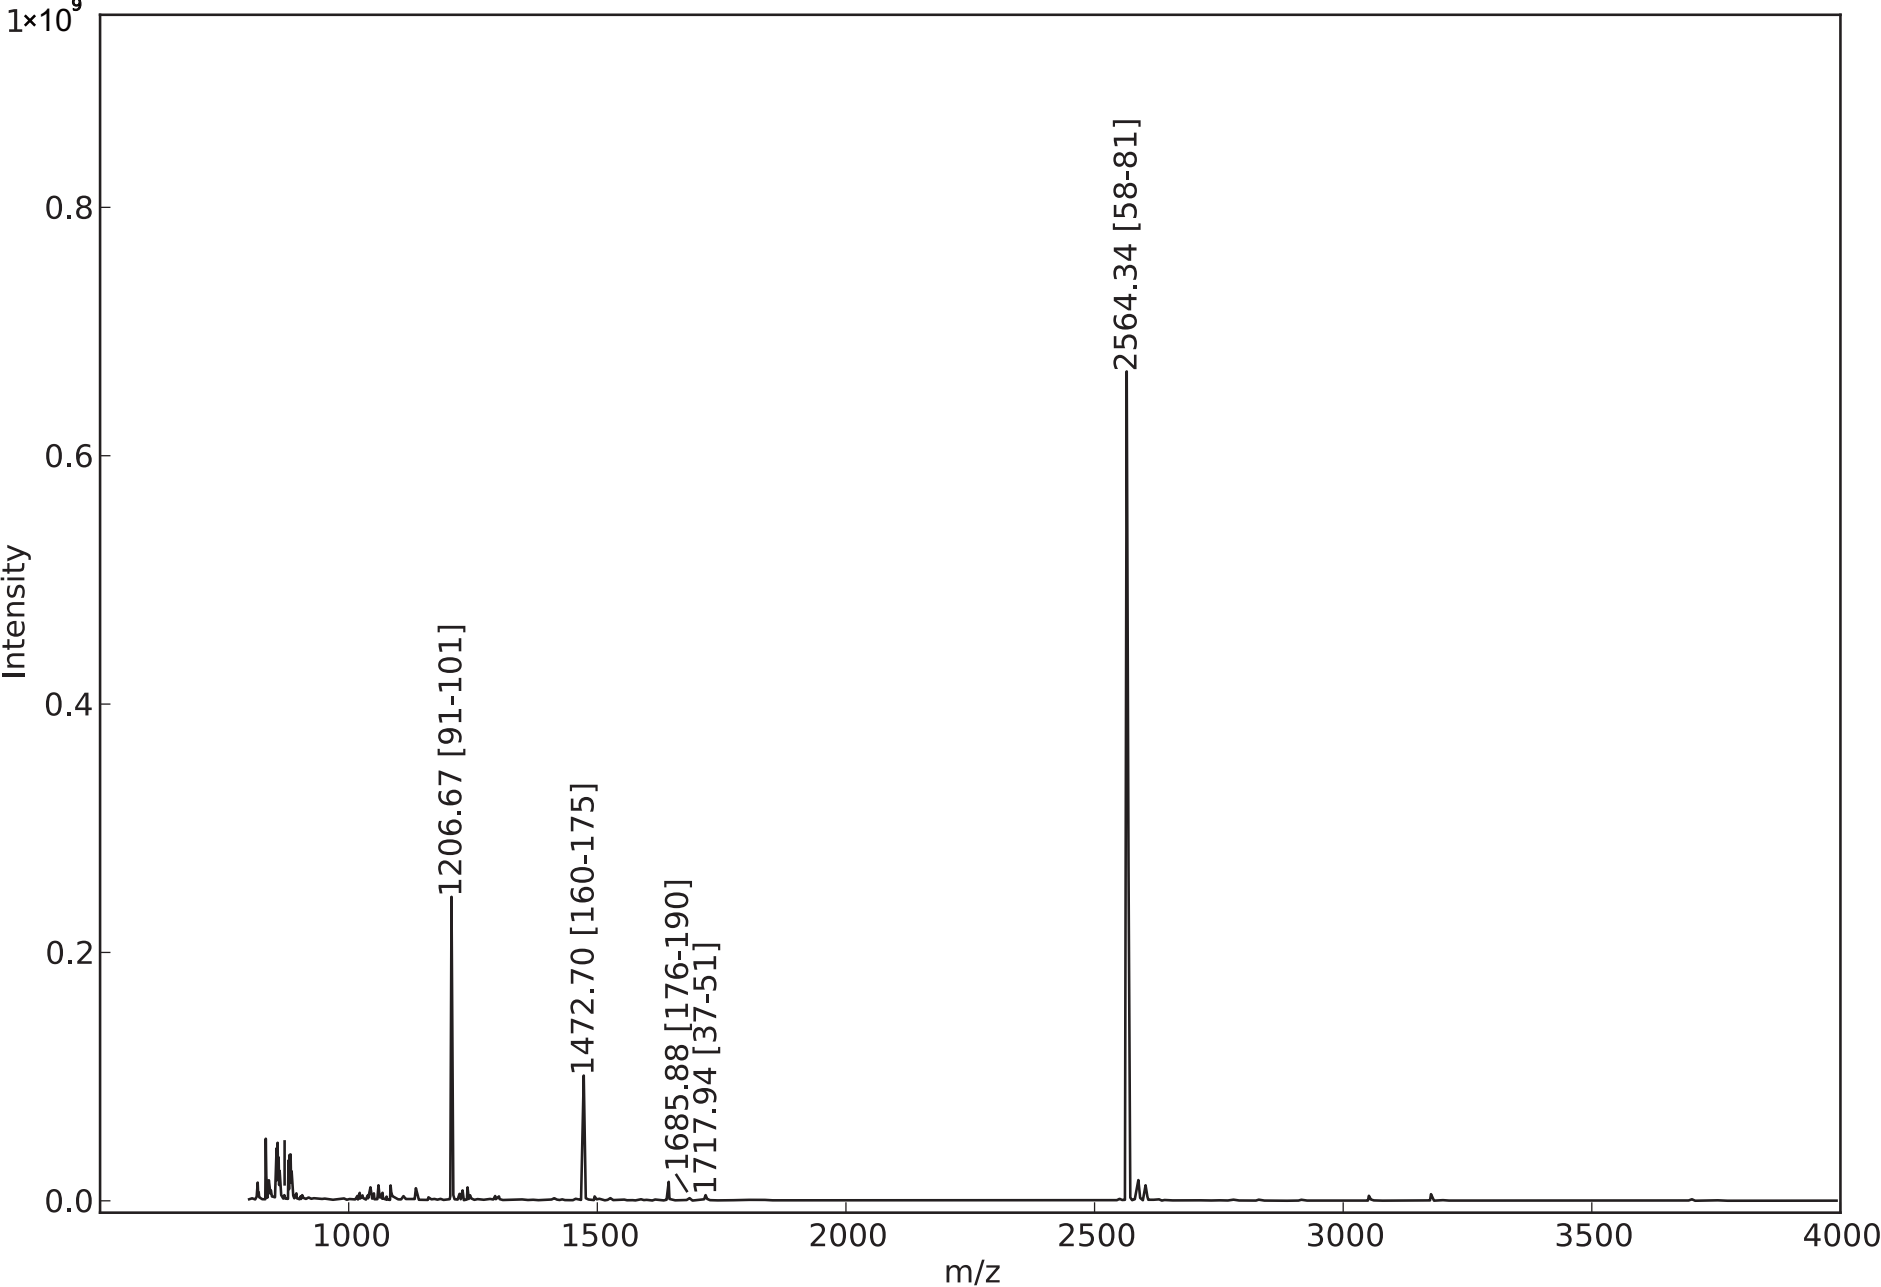

Spot No. 14

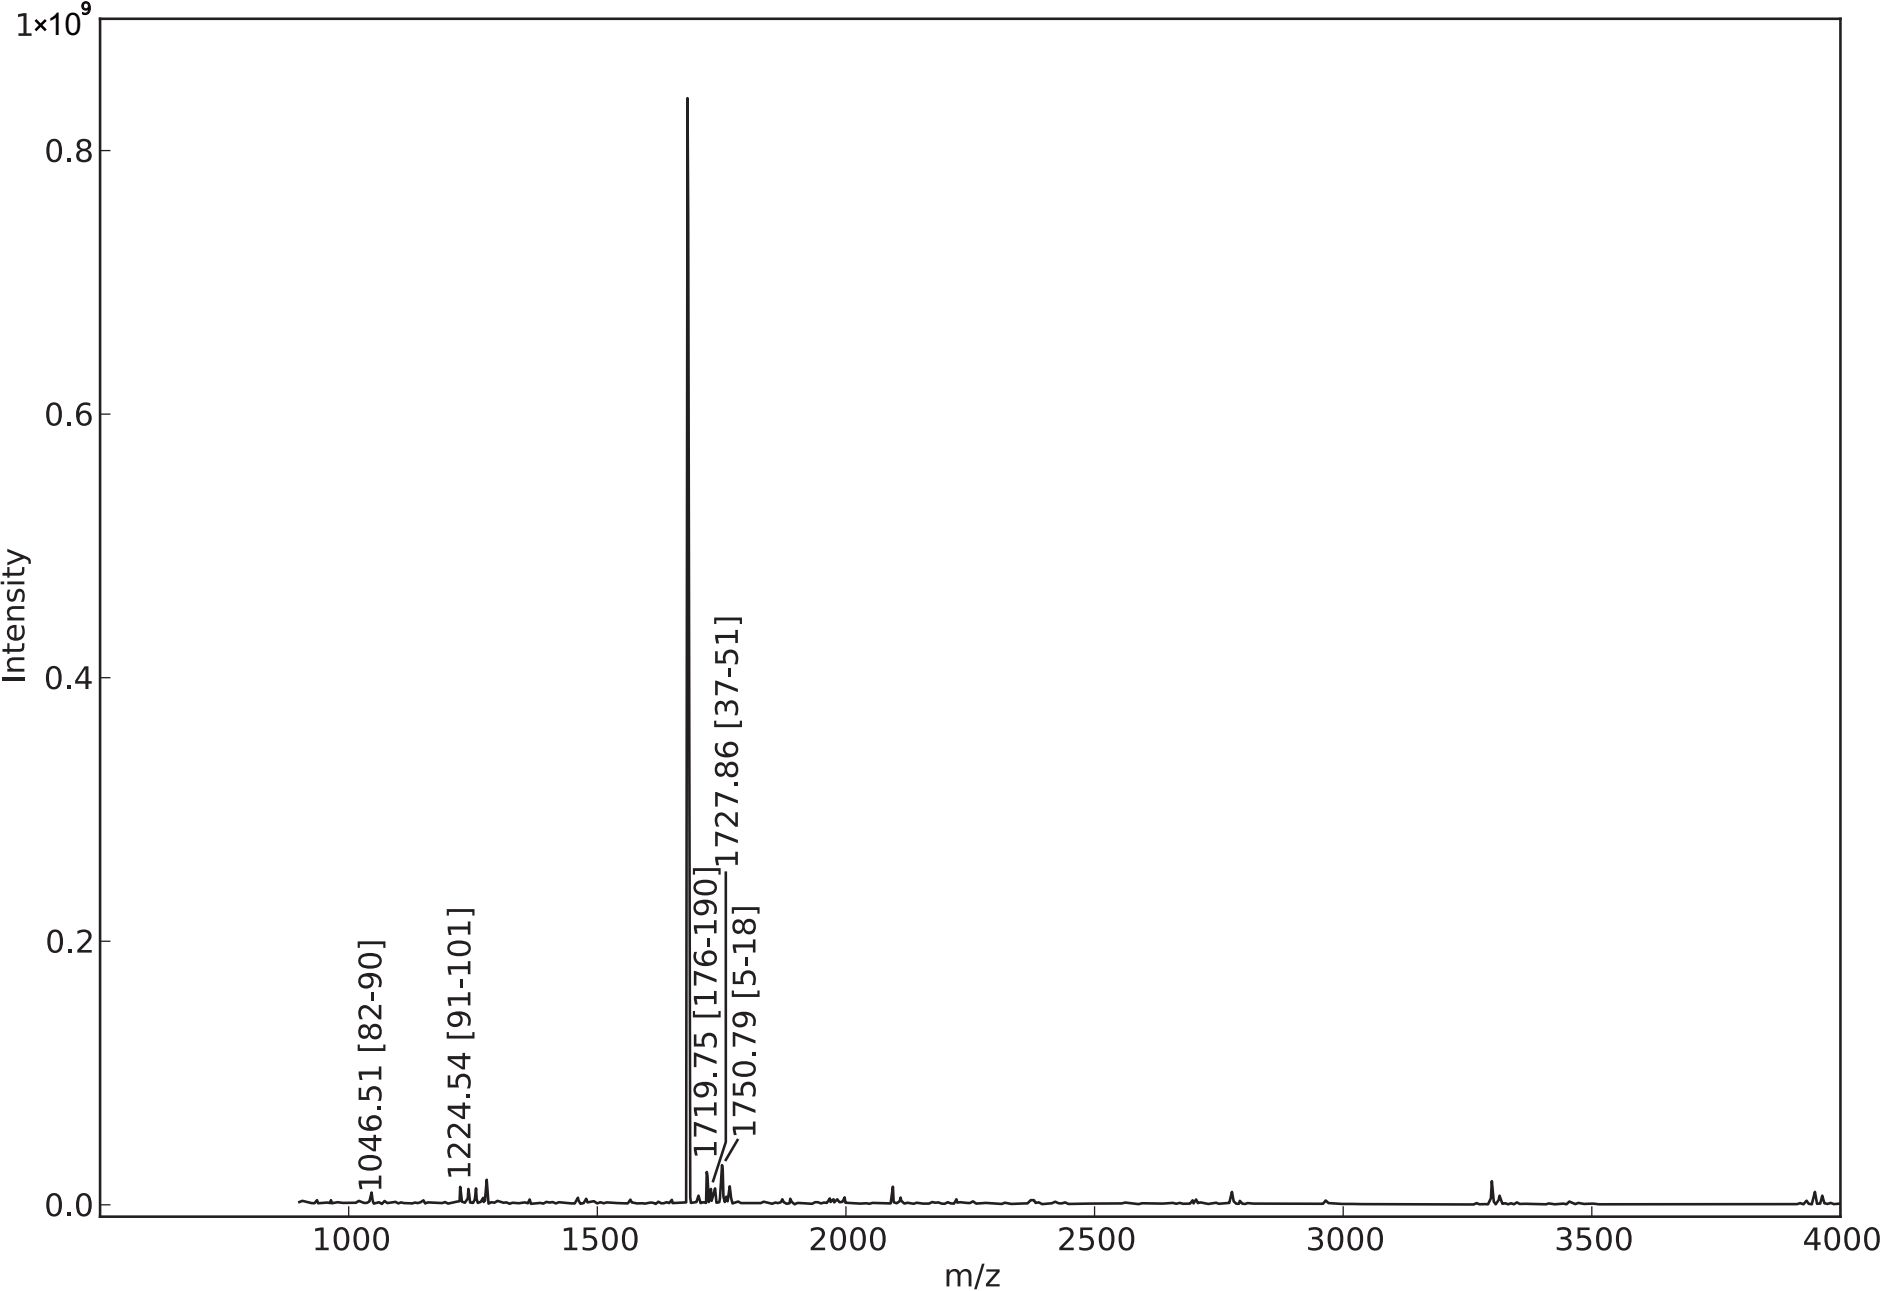



Spot No. 15

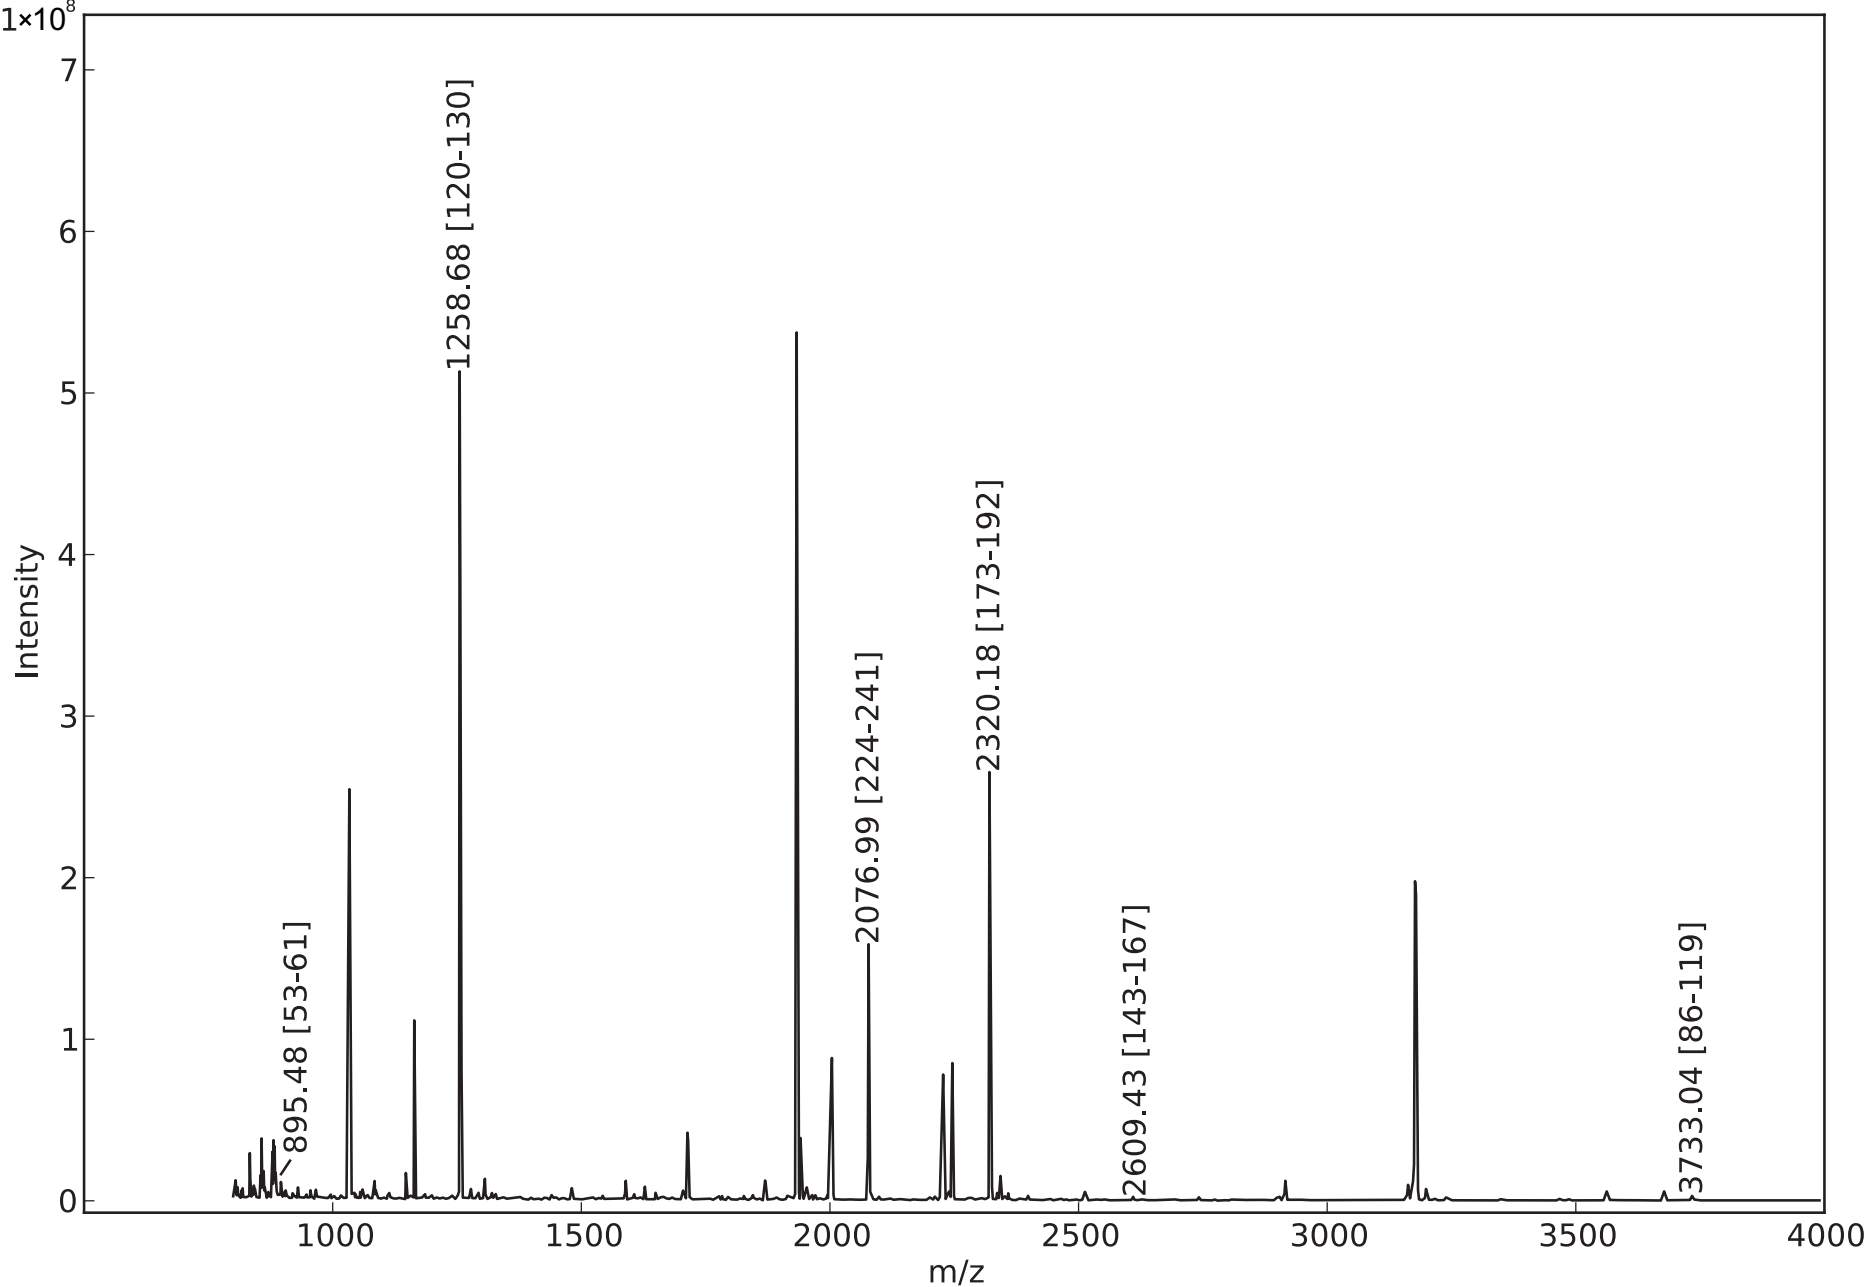

Spot No. 16

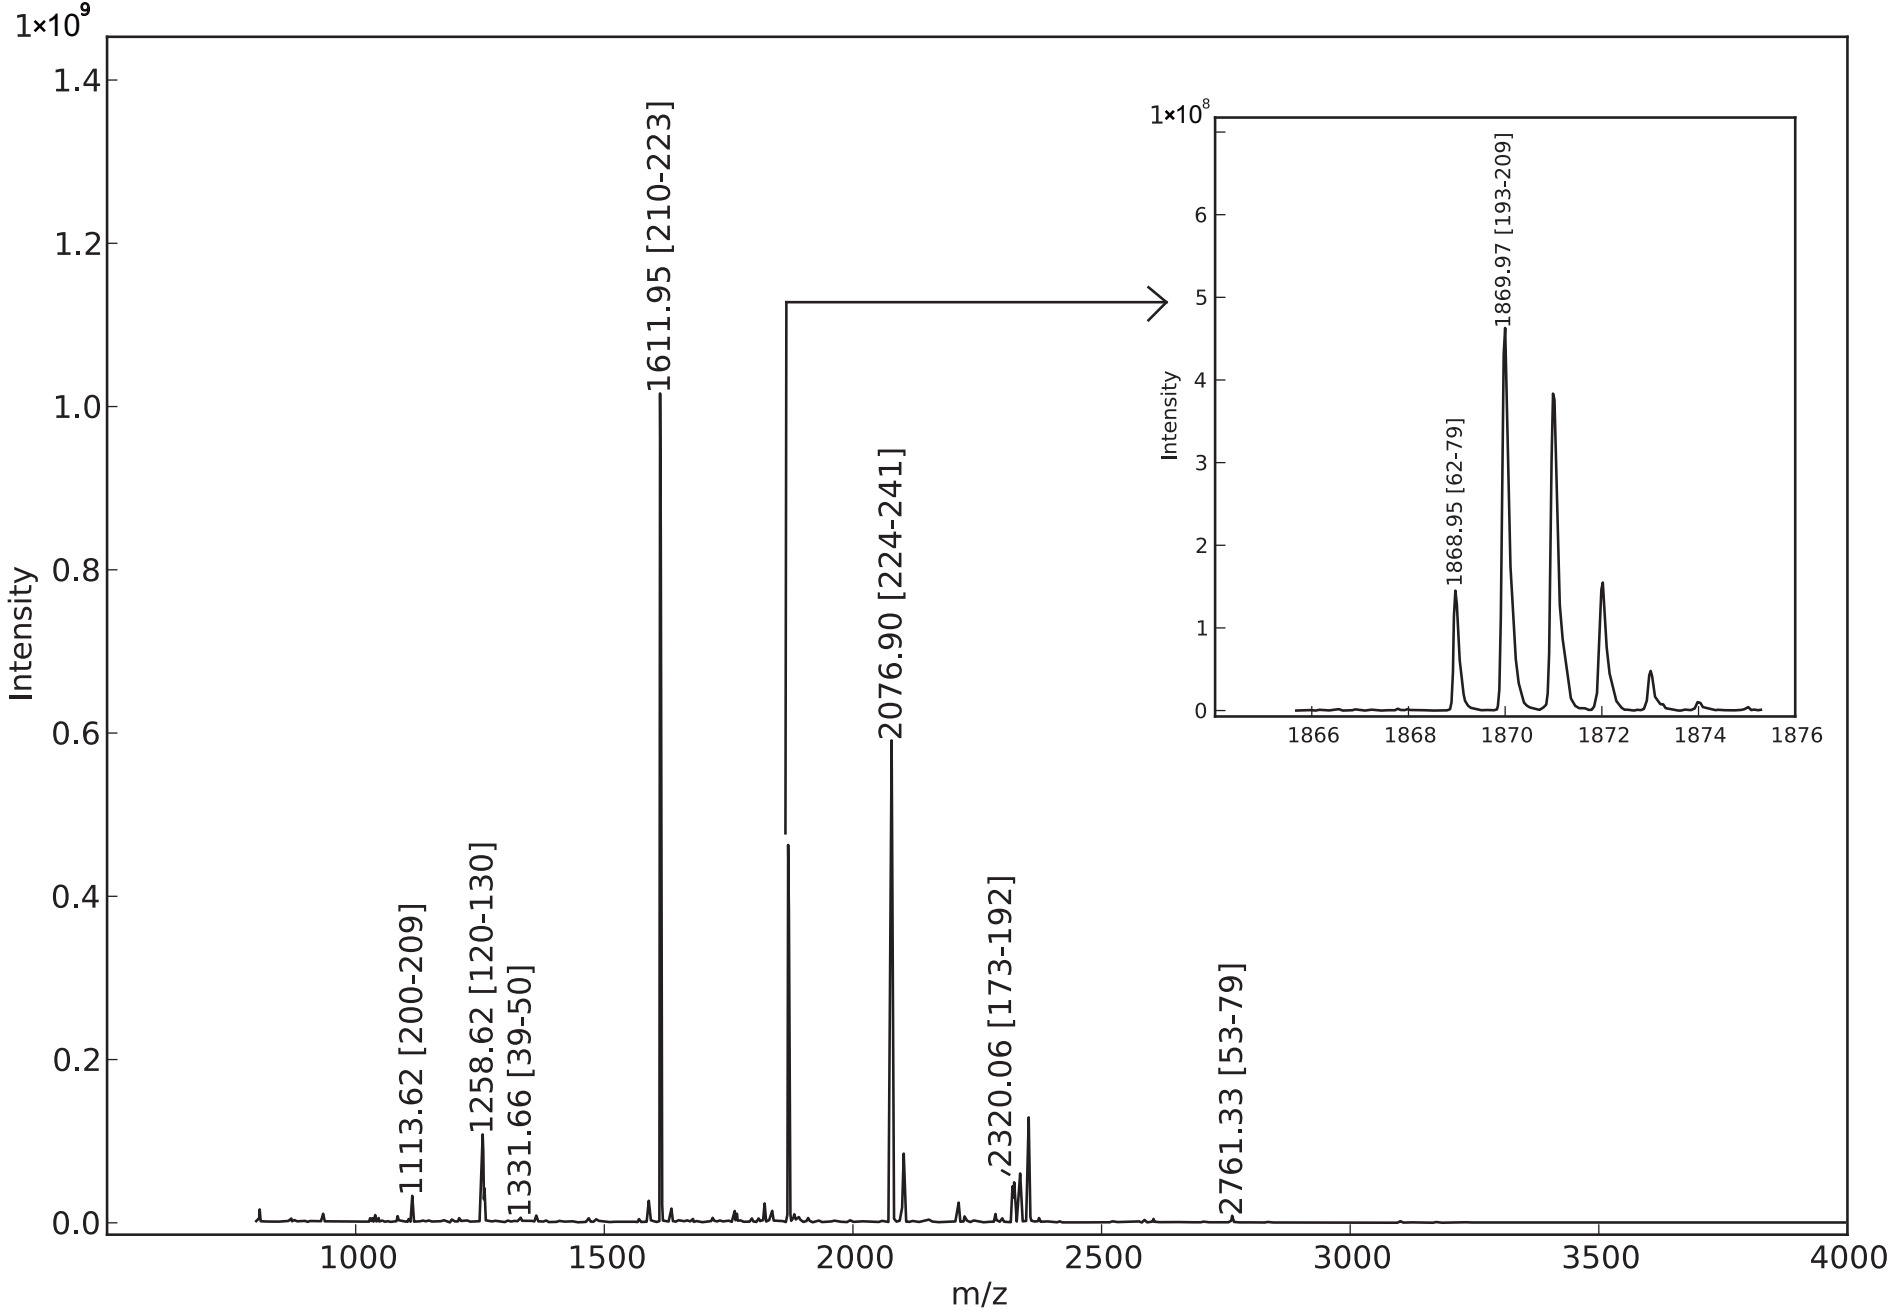

Spot No. 17

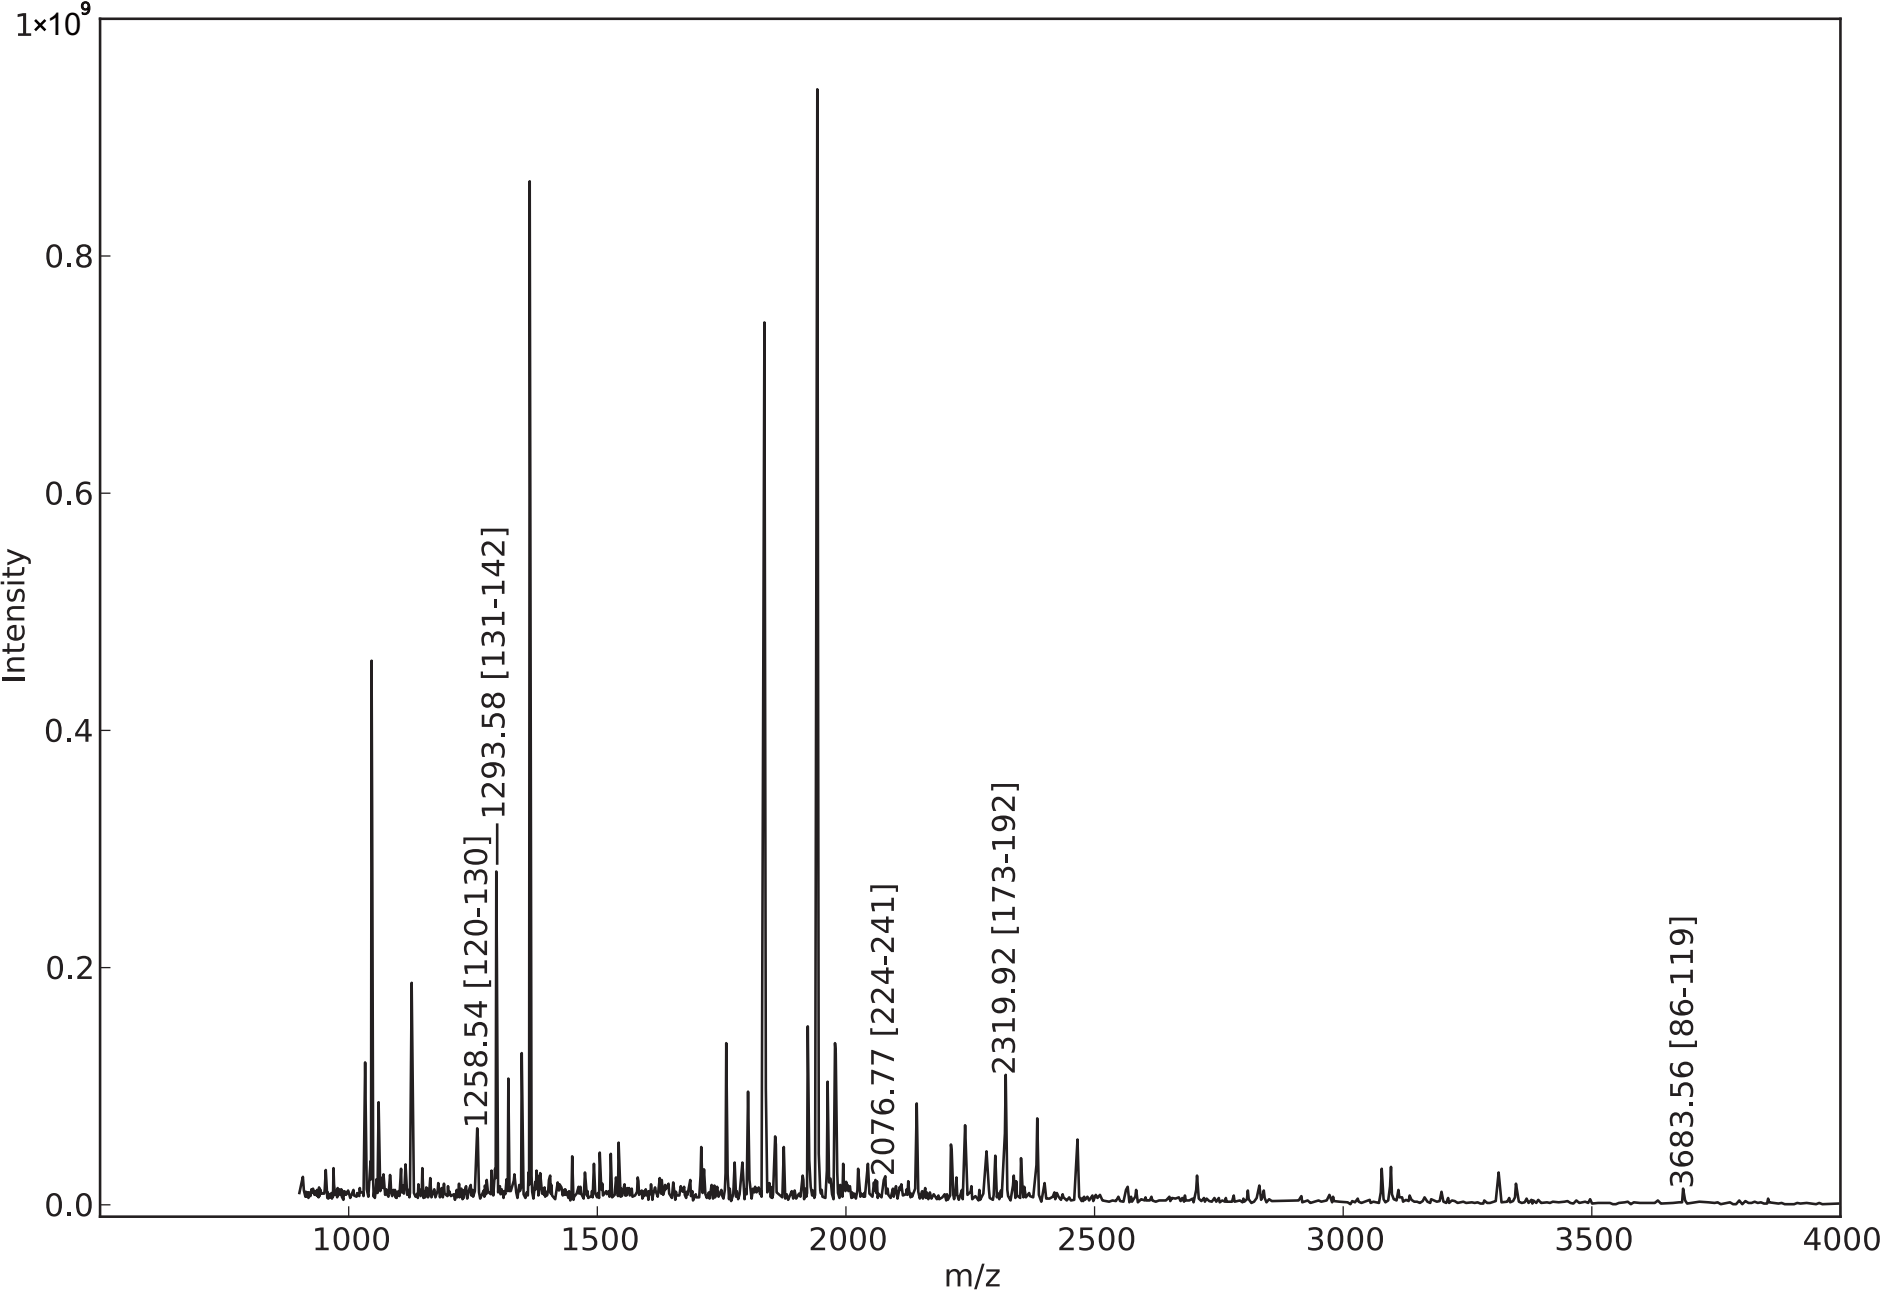

Spot No. 18

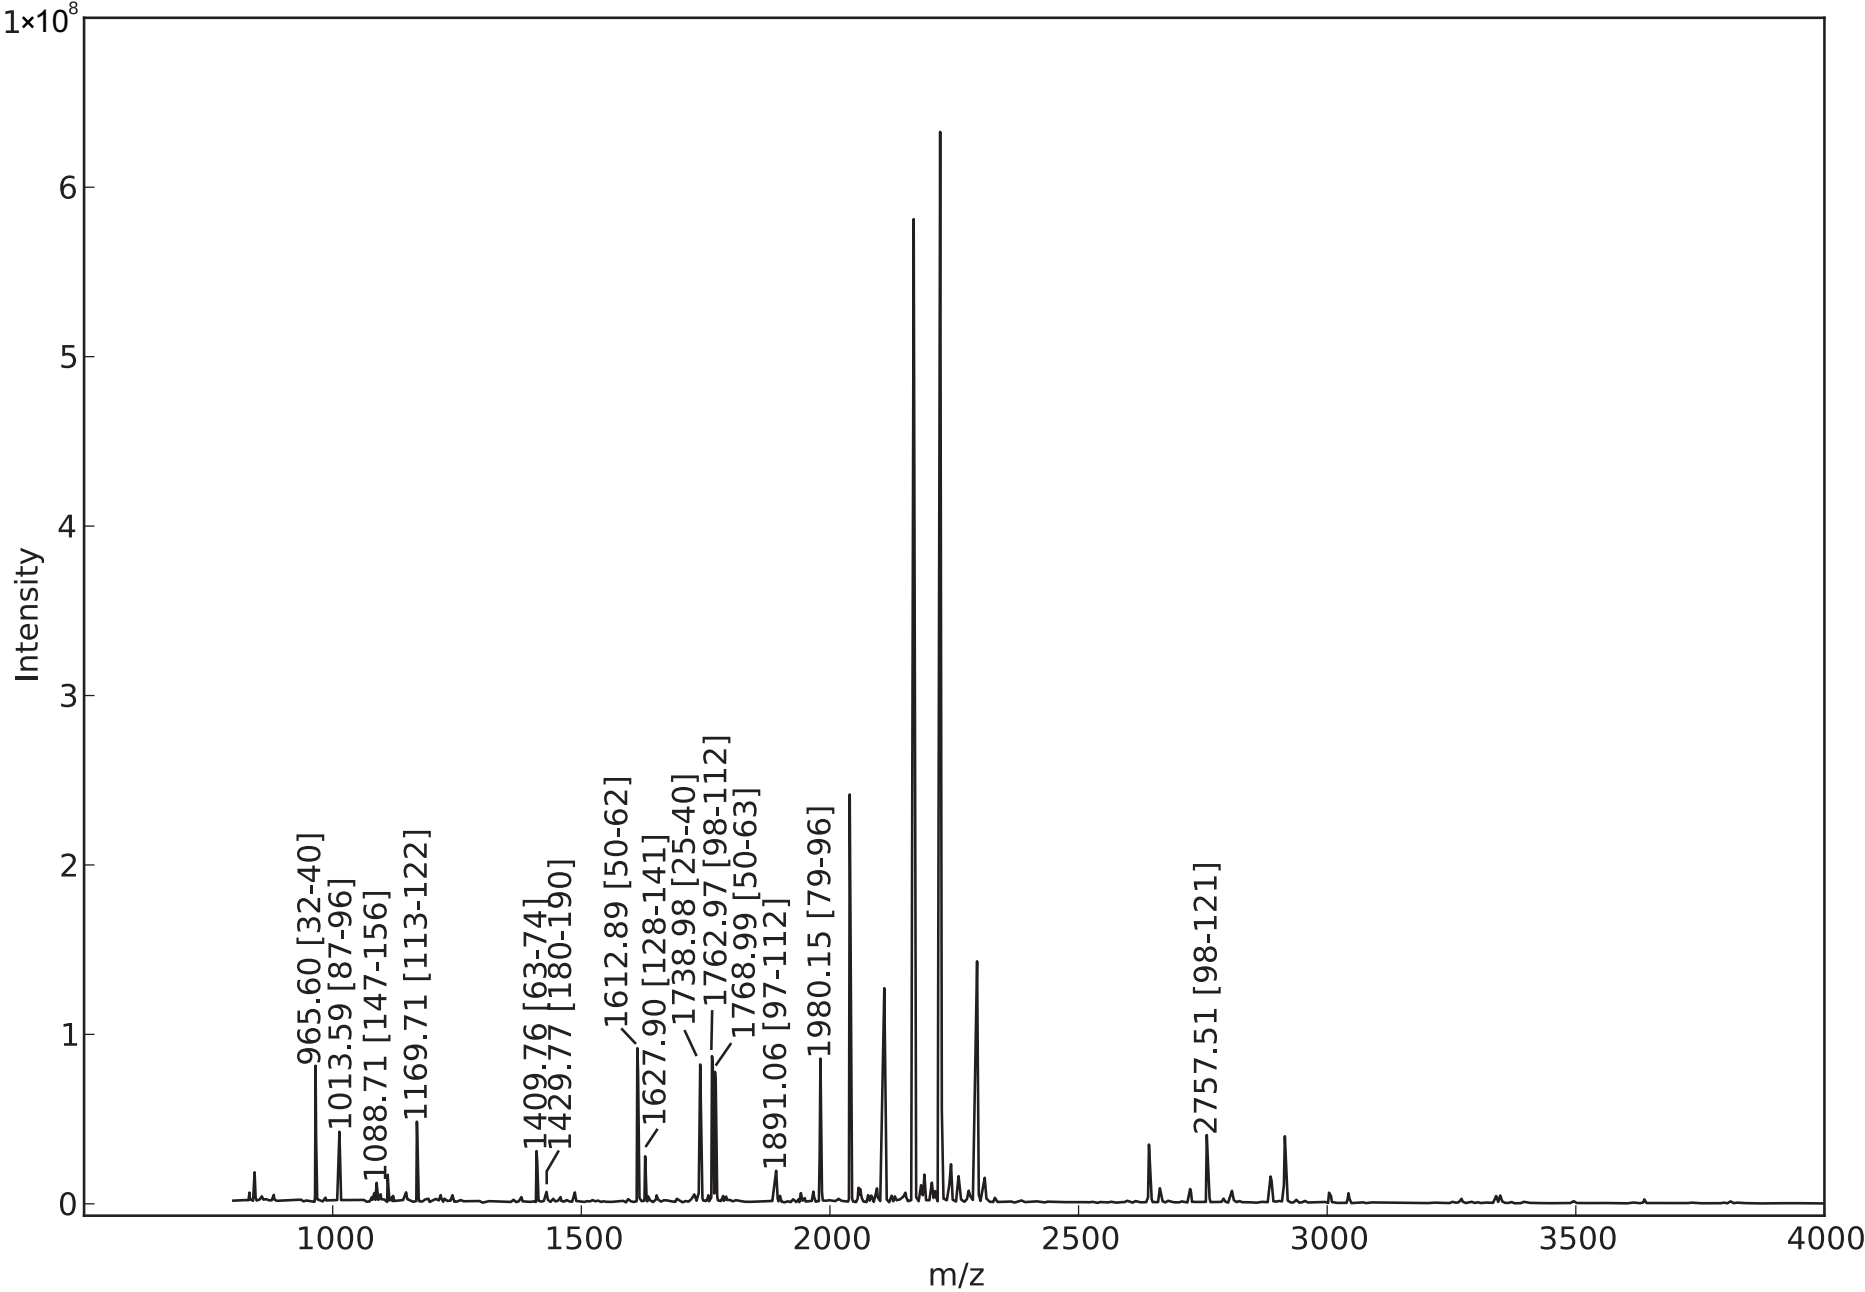

Spot No. 19

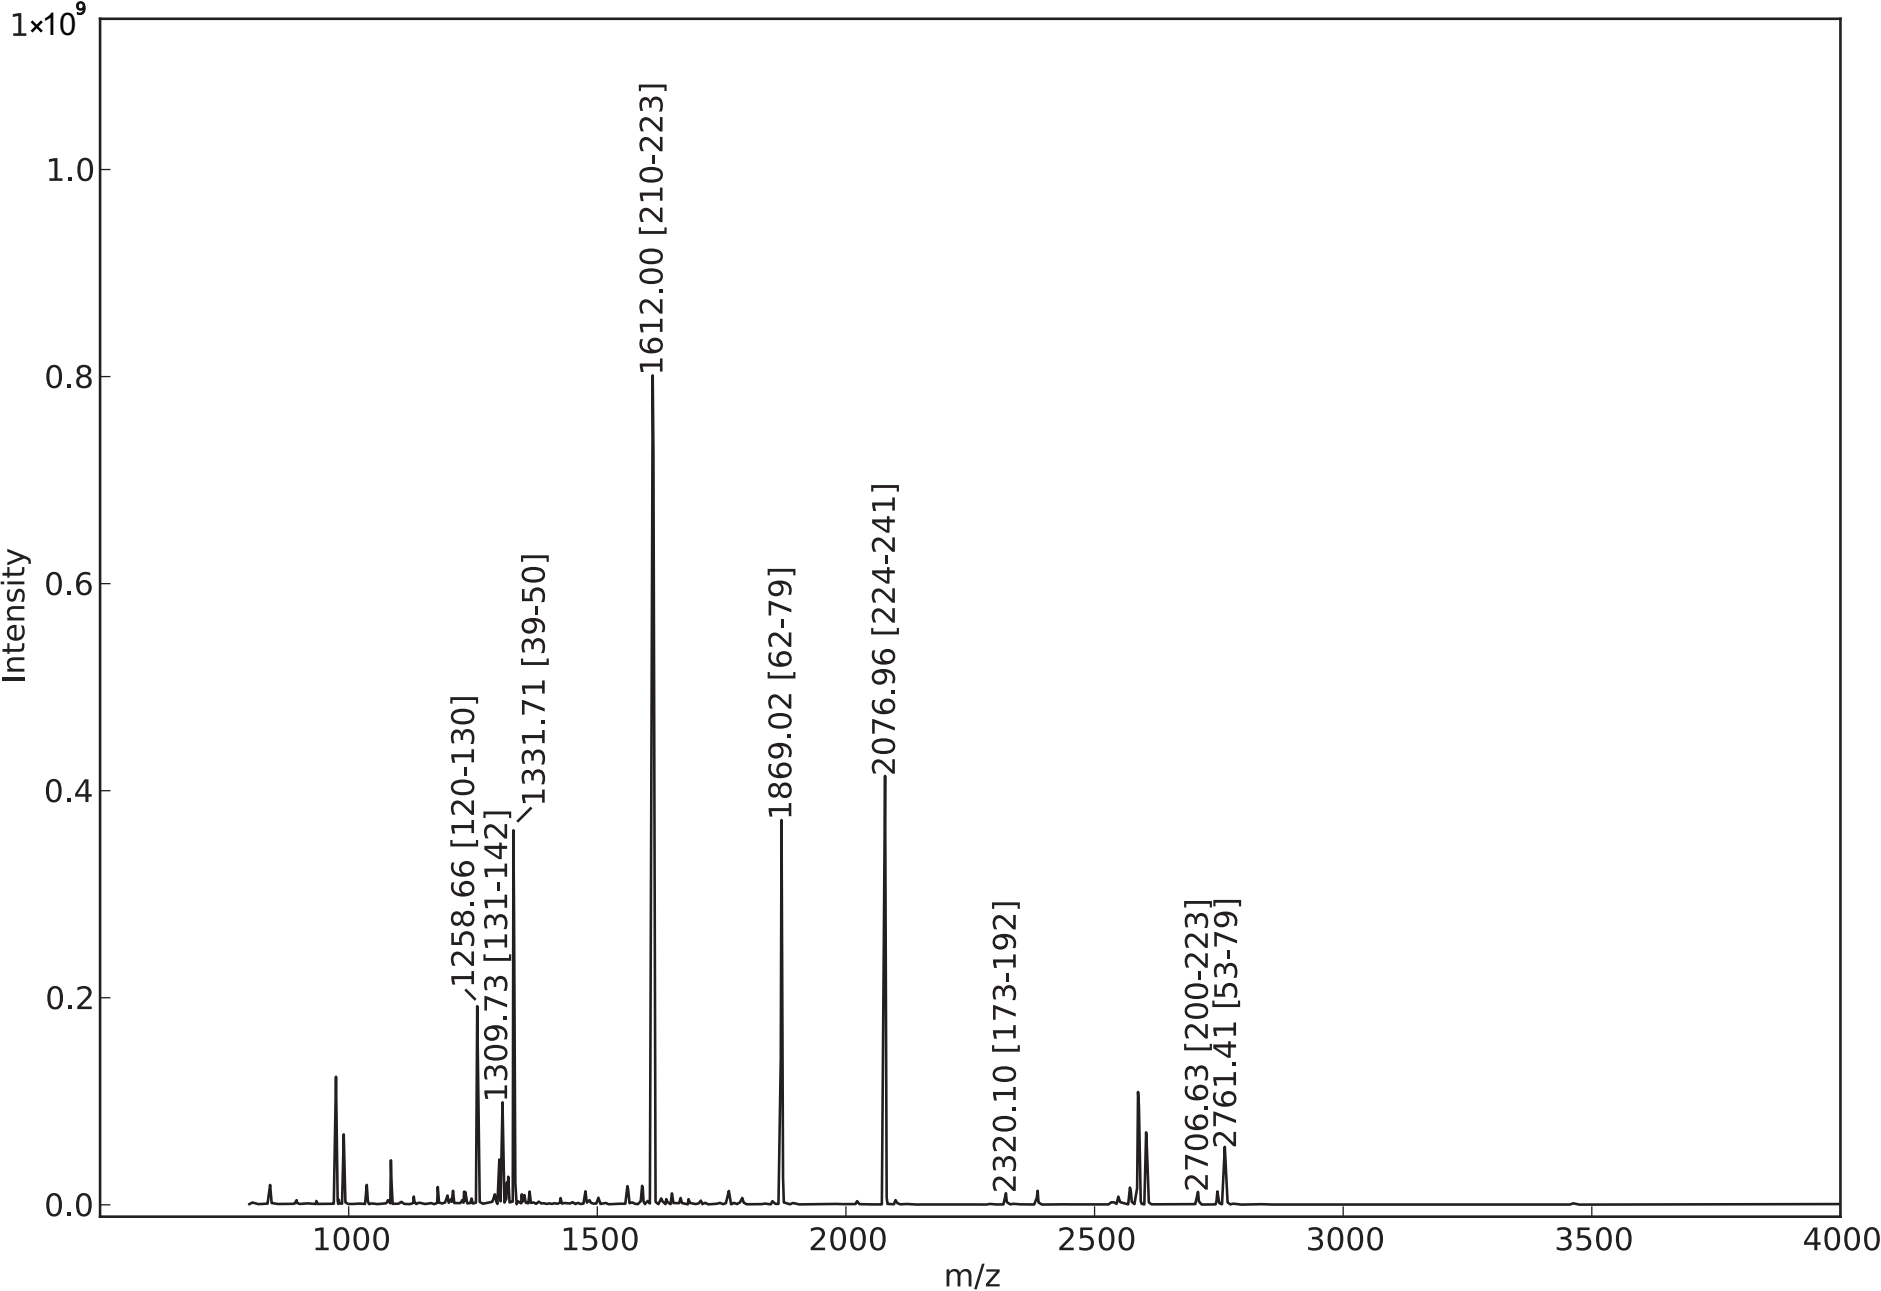

Spot No. 20

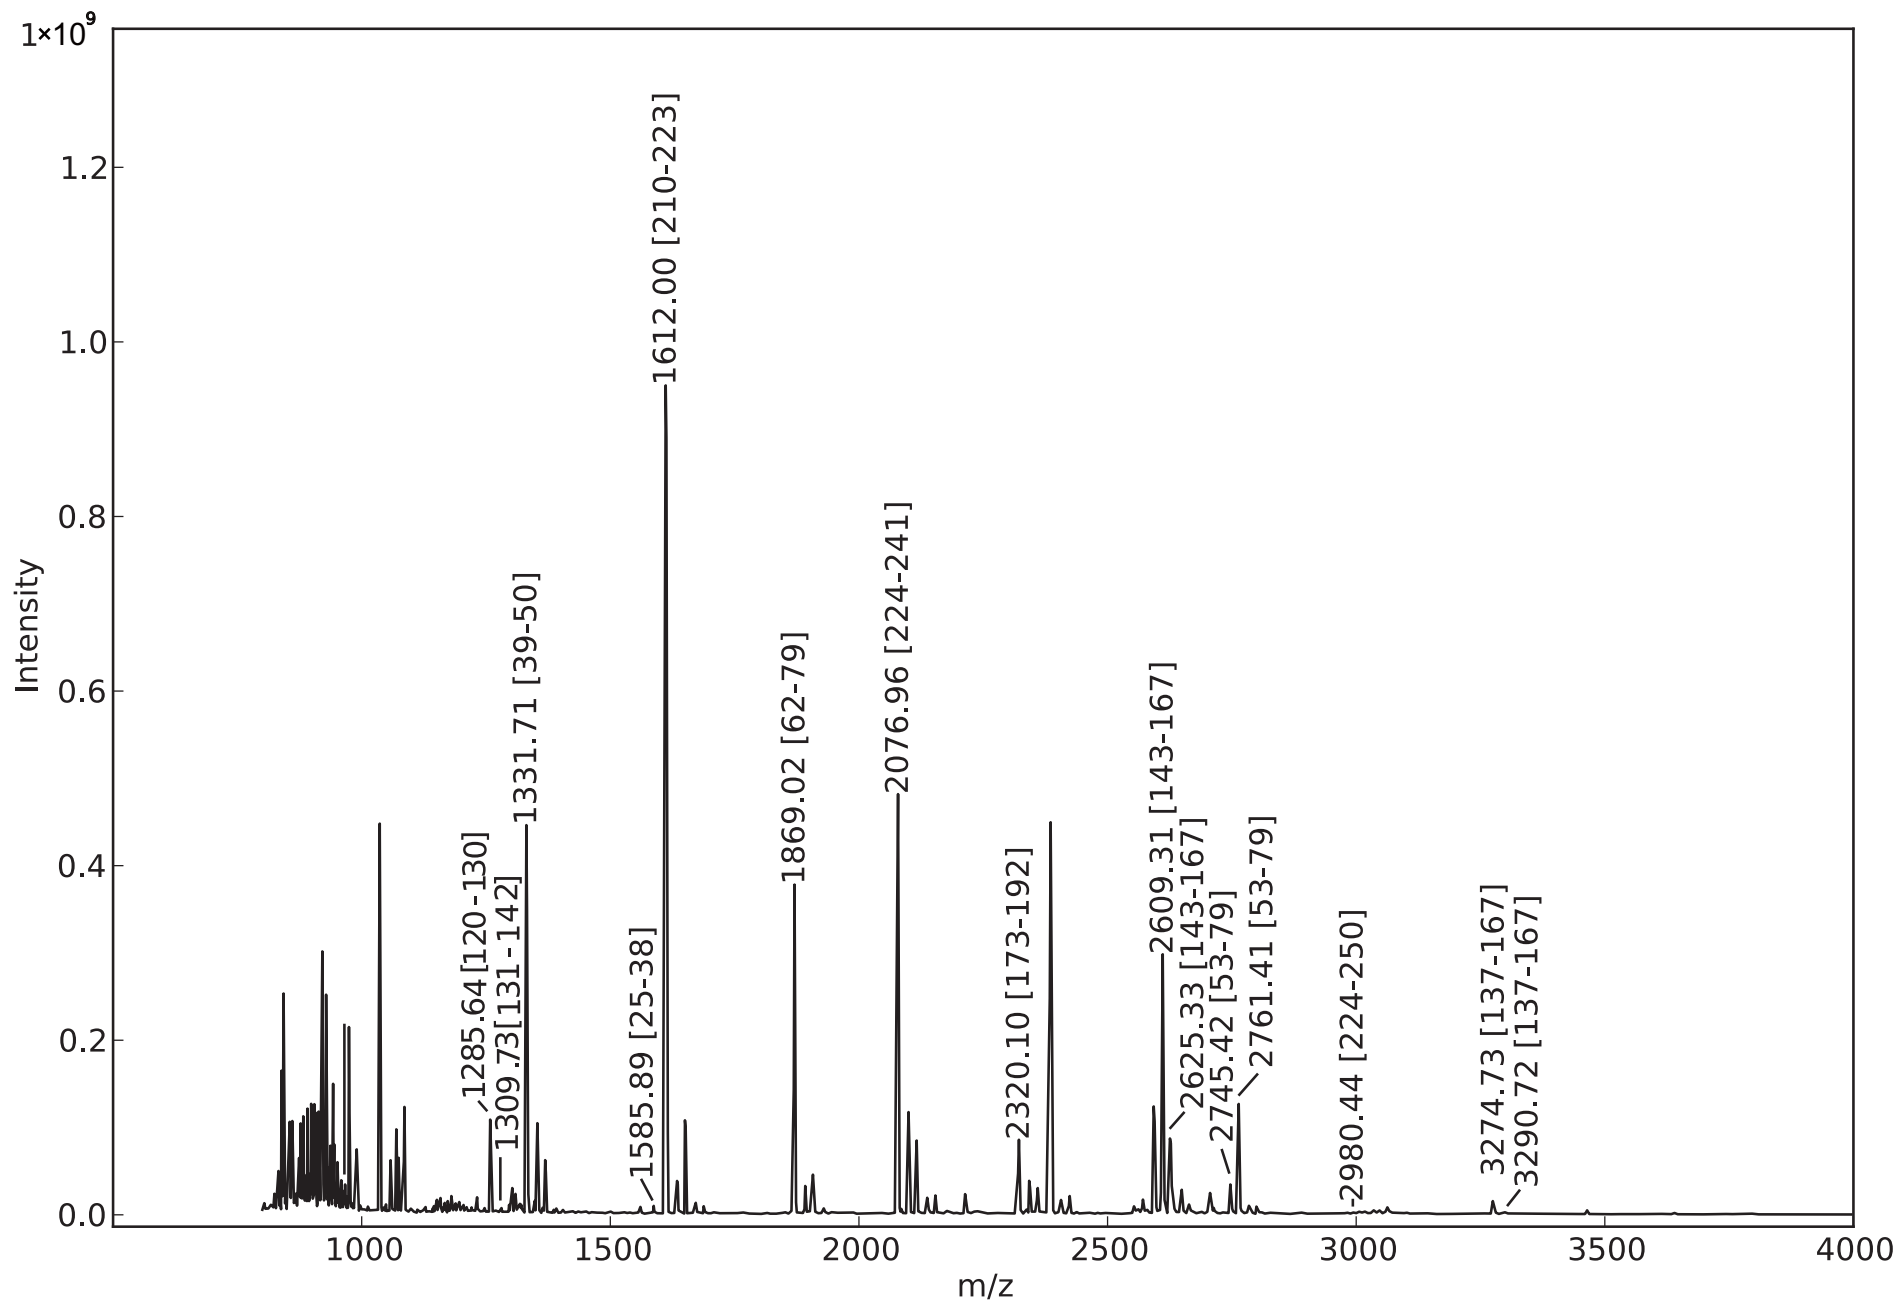

Spot No. 21

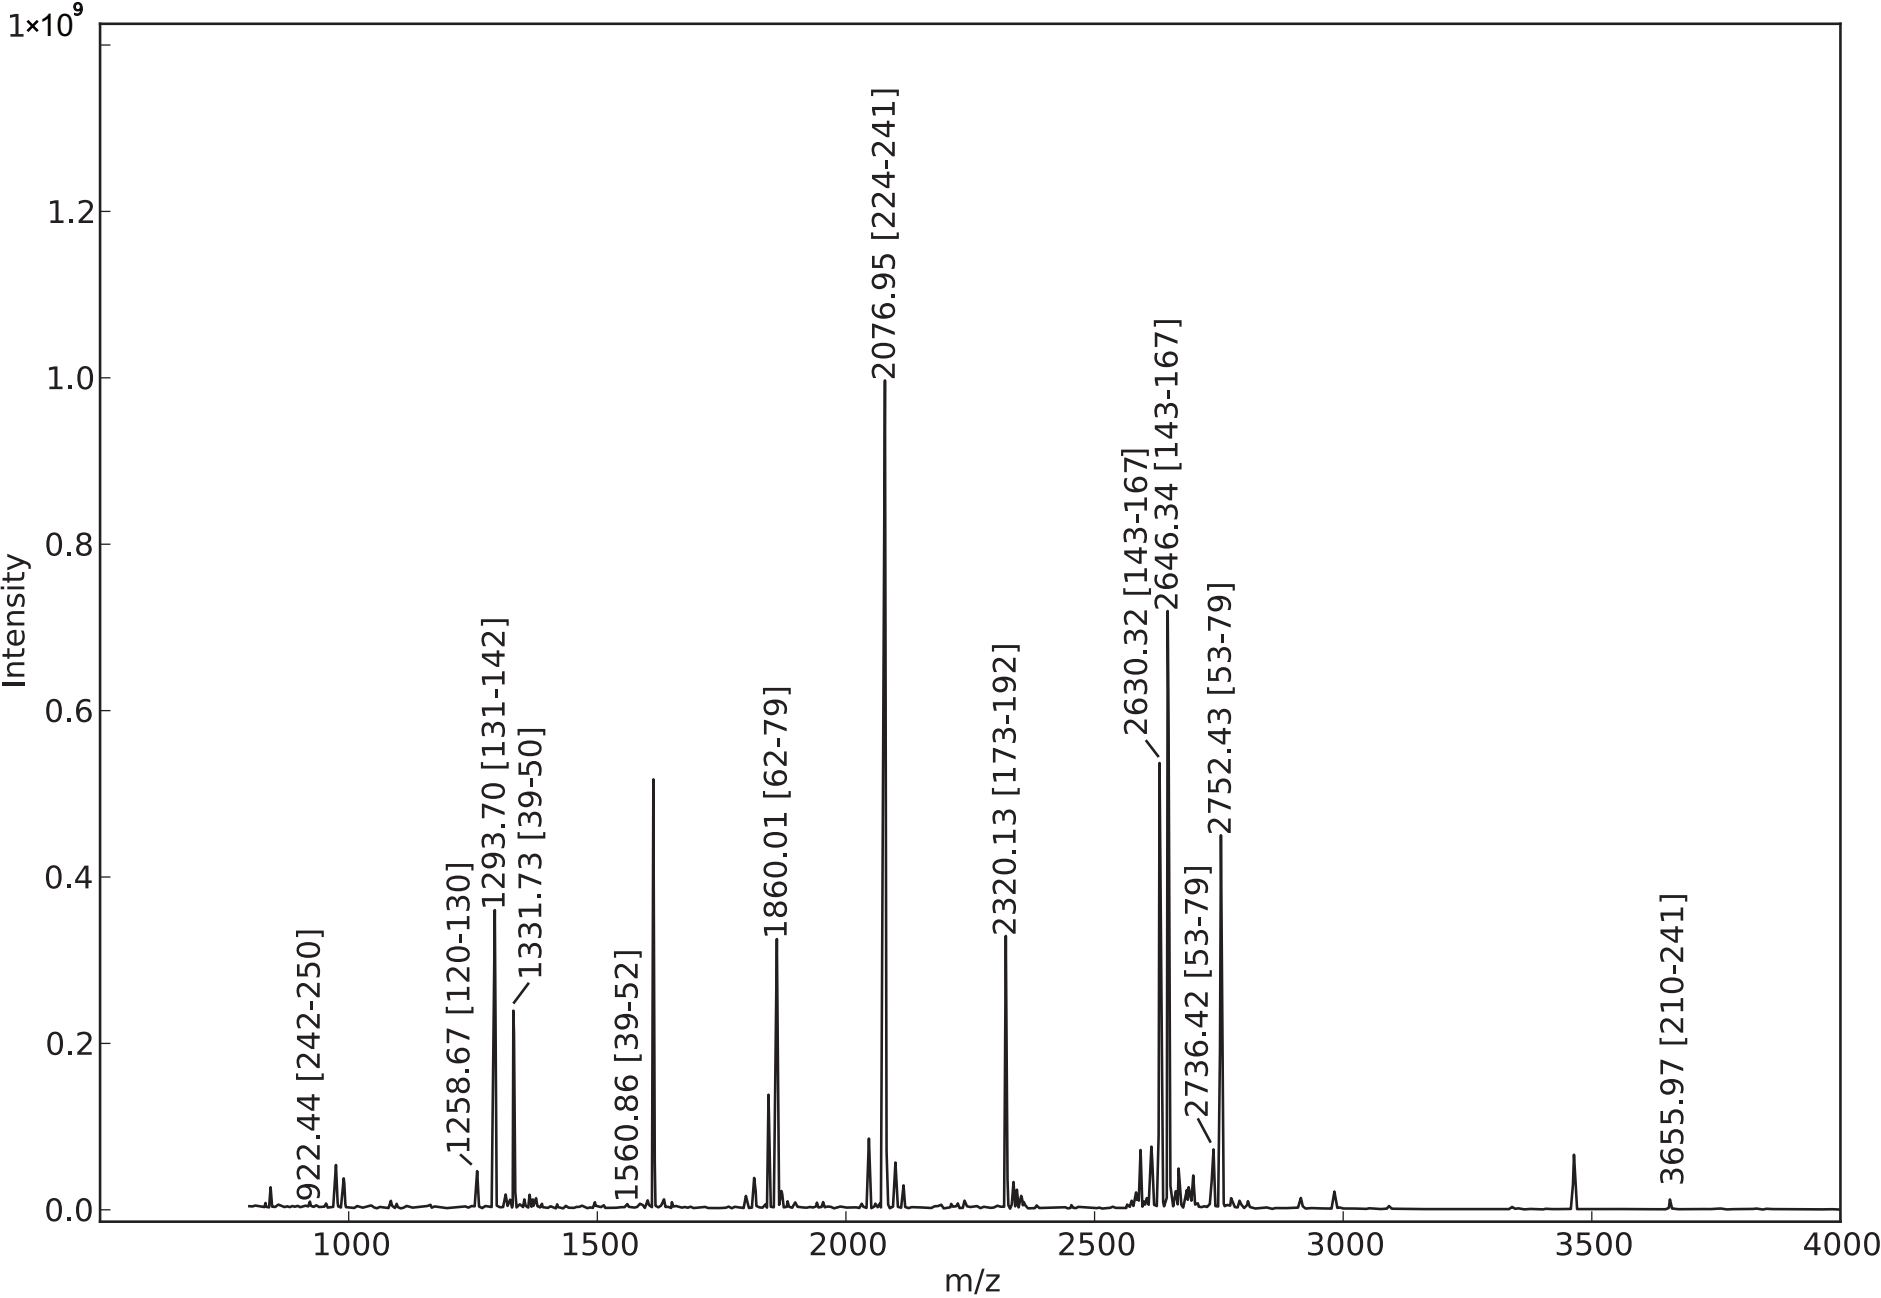

Spot No. 22

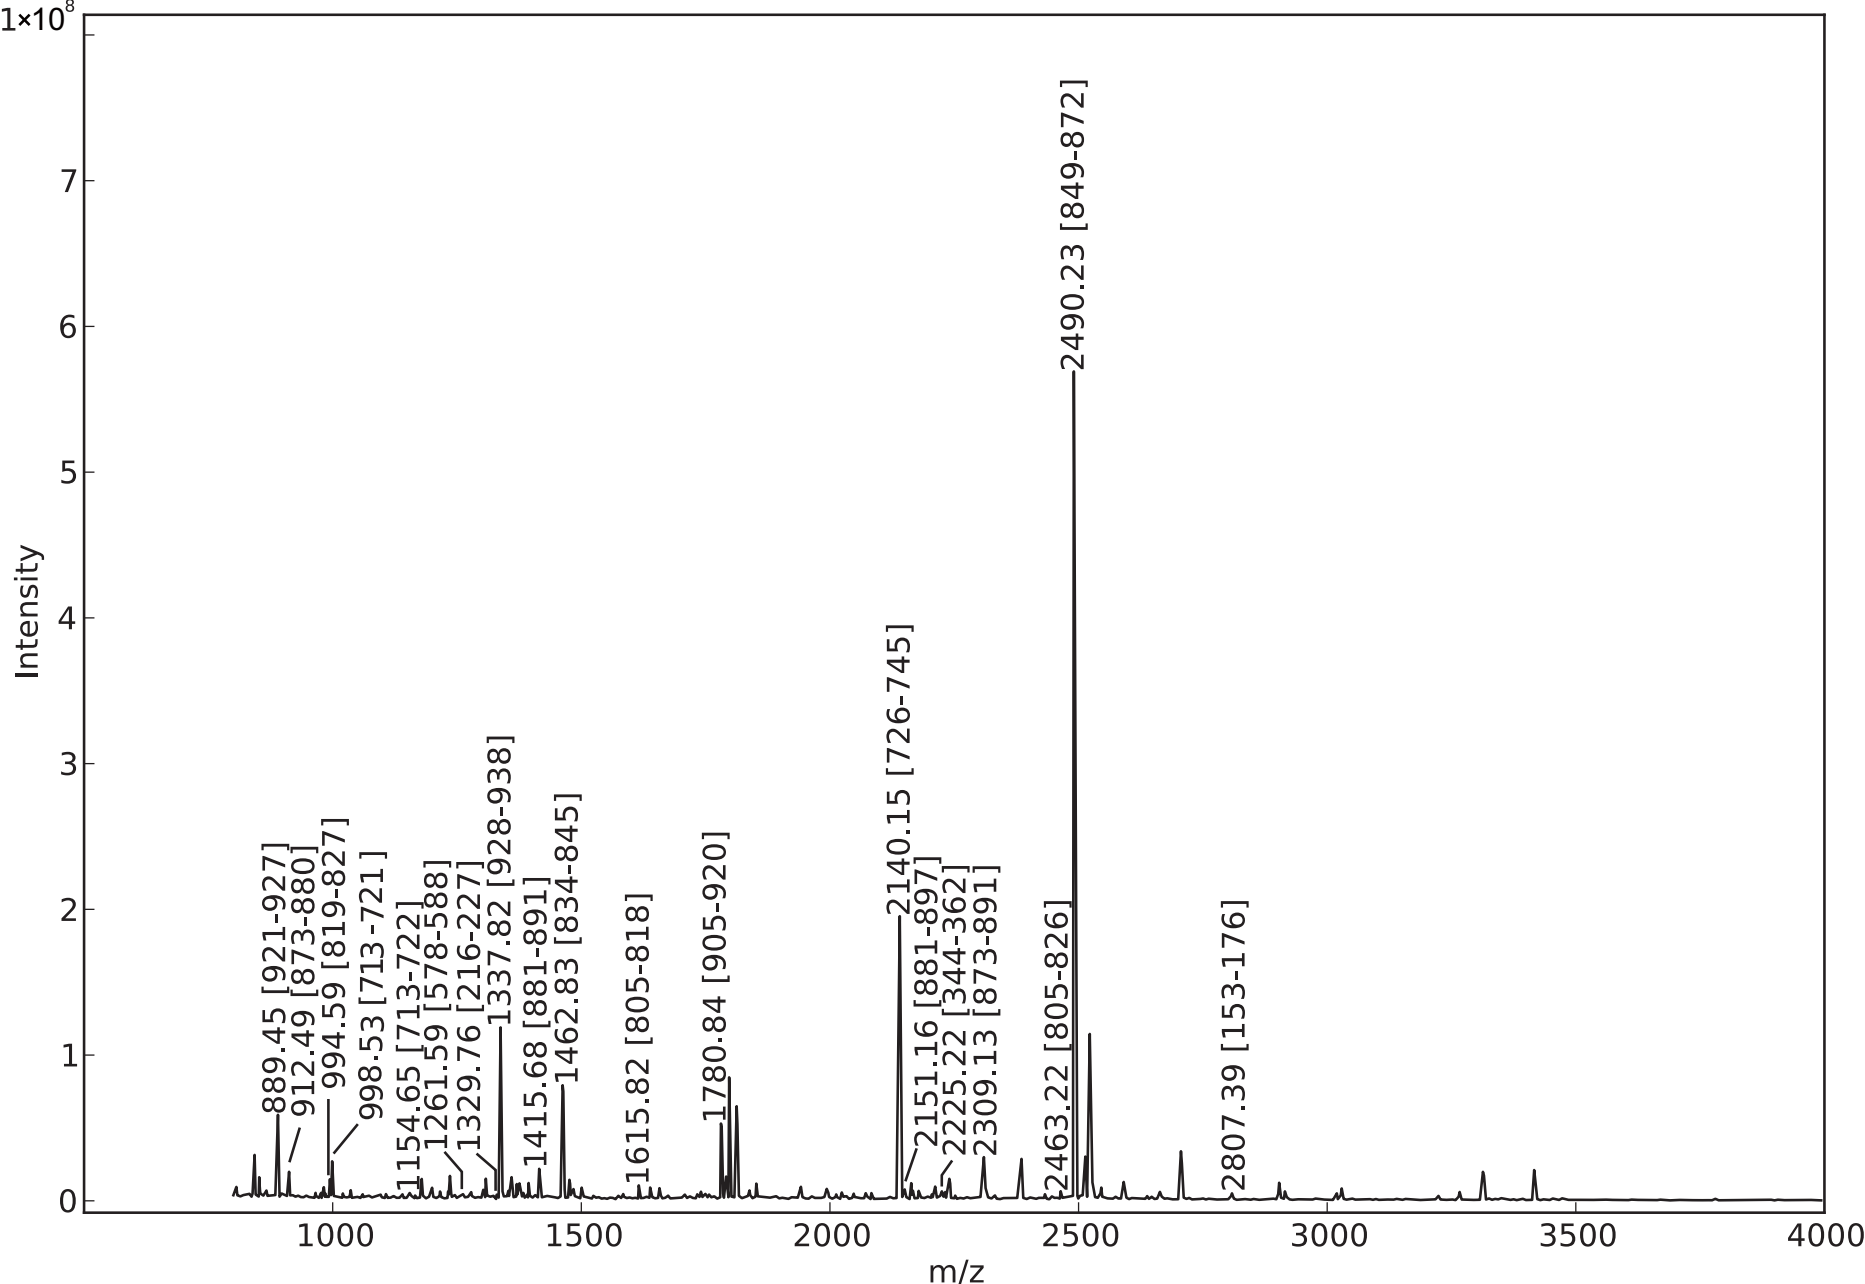



Spot No. 23

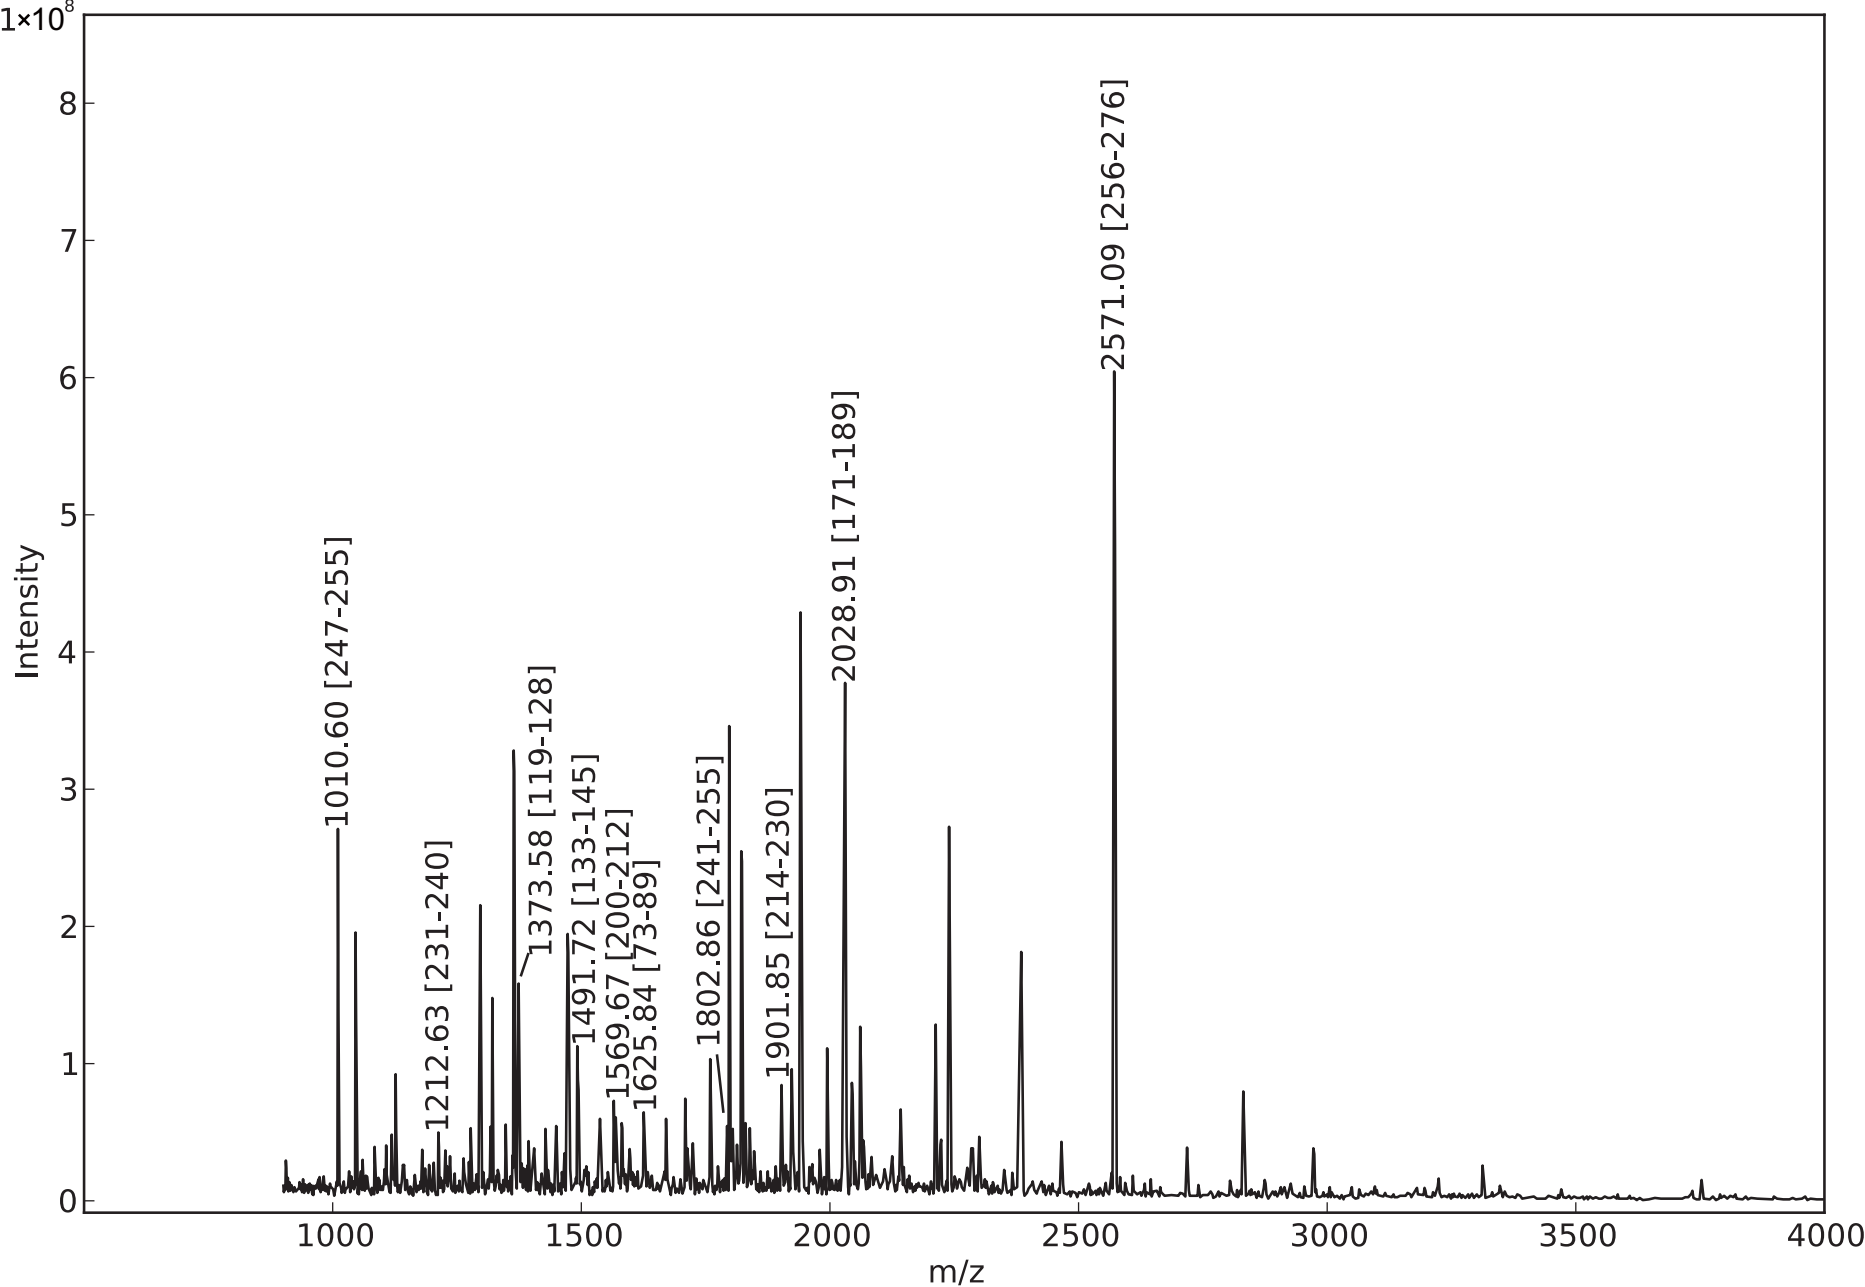

Spot No. 24

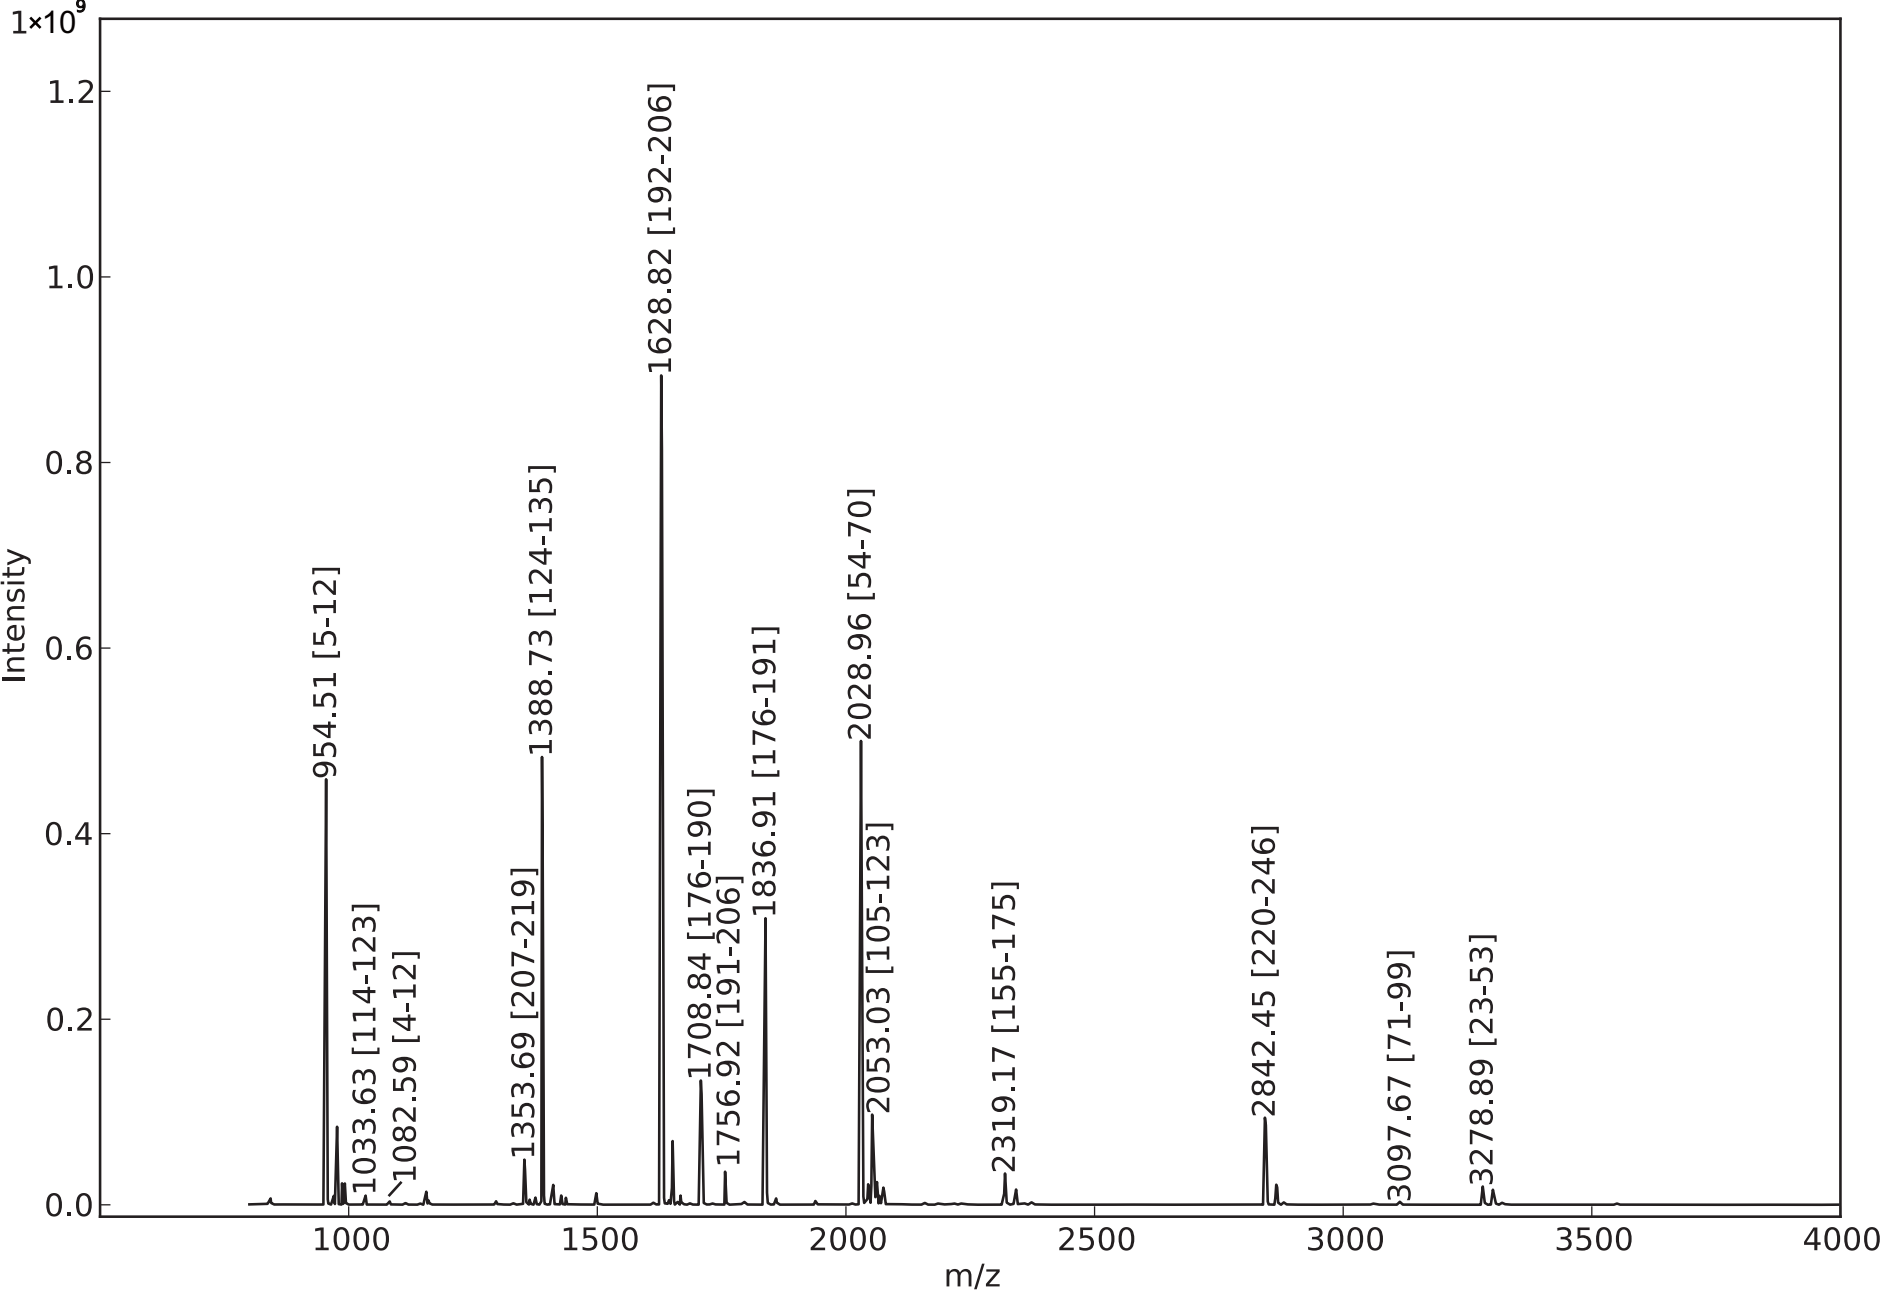

Spot No. 25

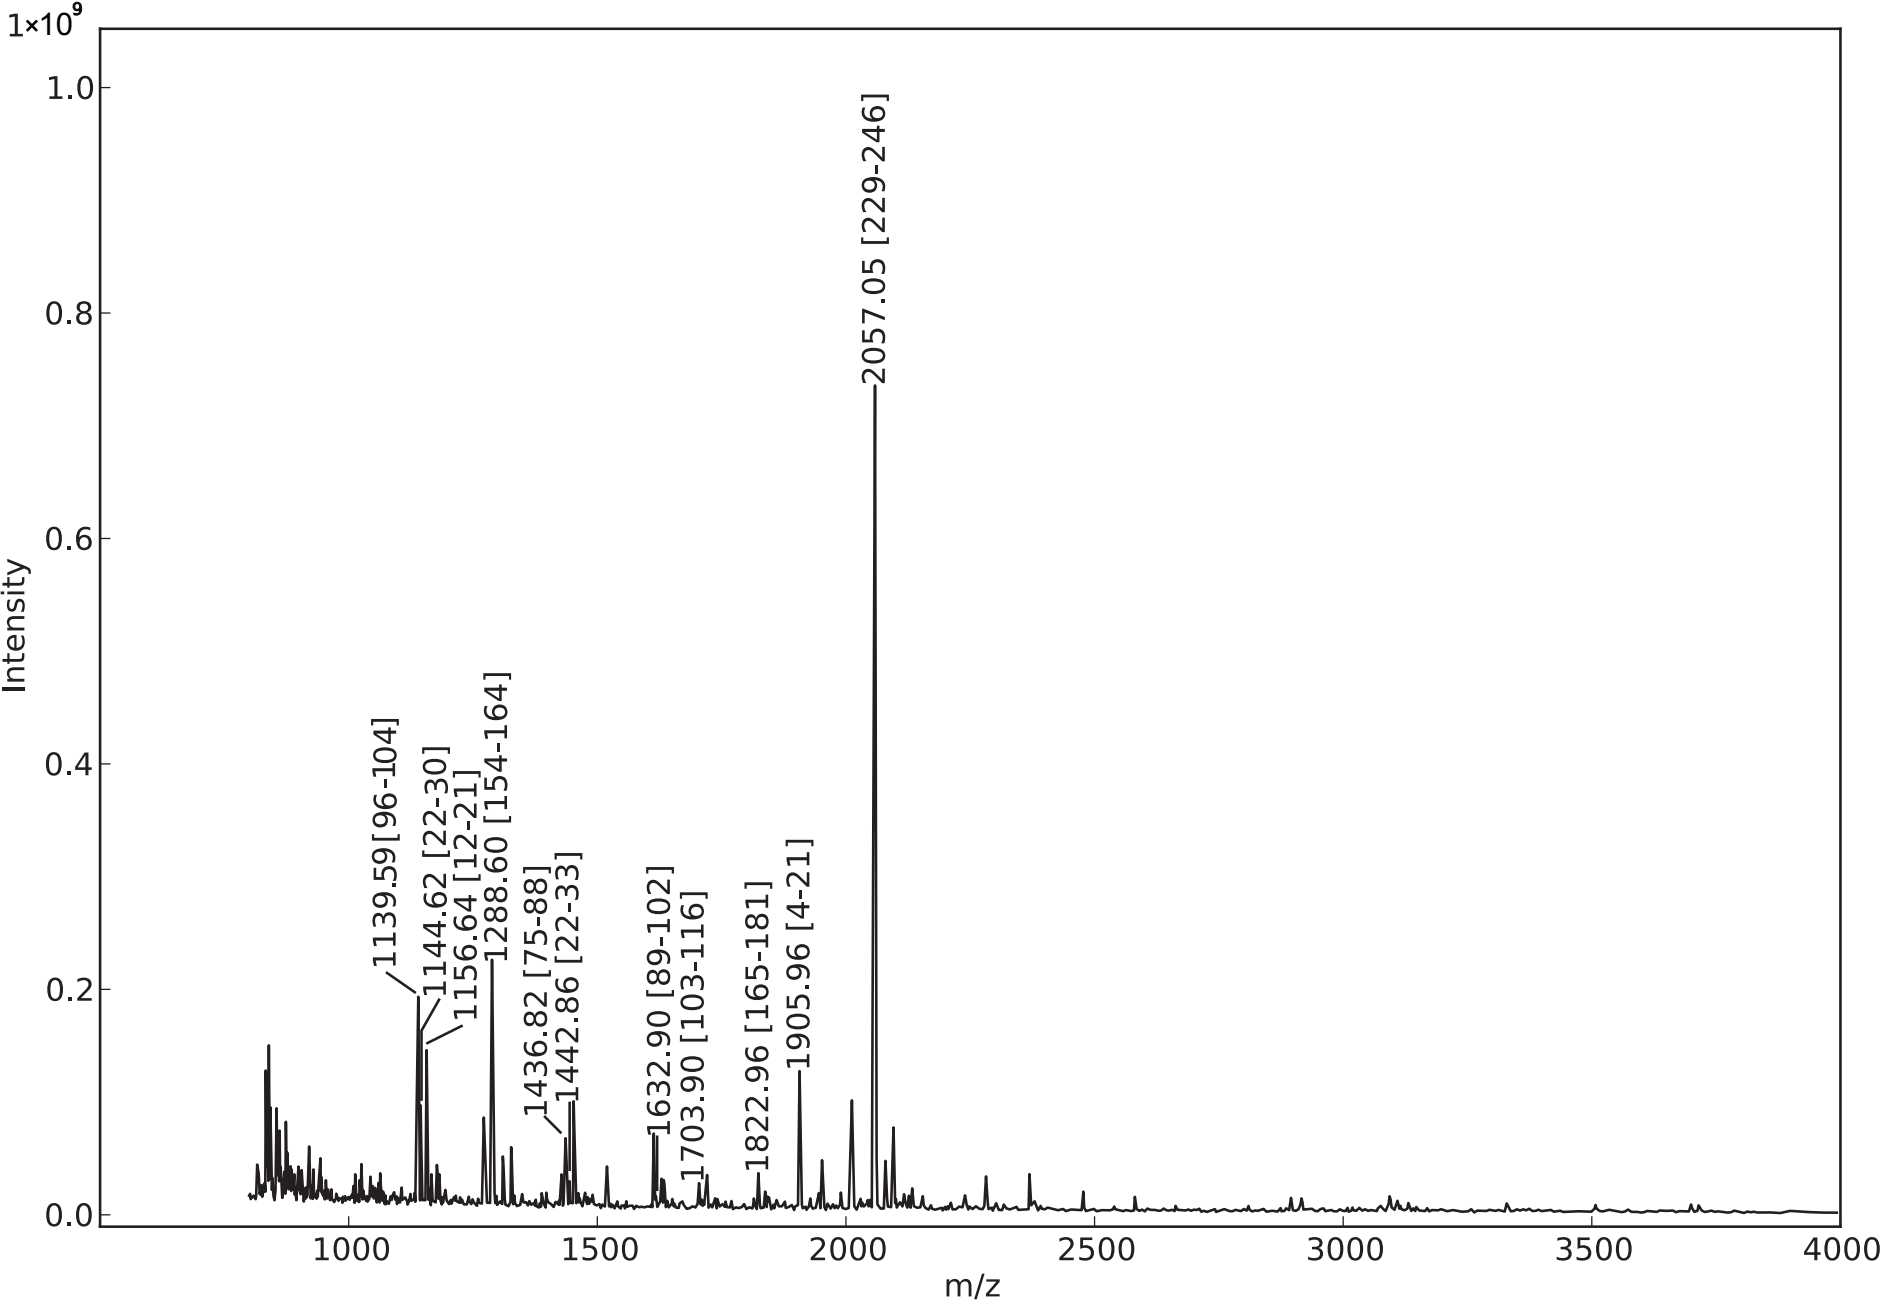

Spot No. 26

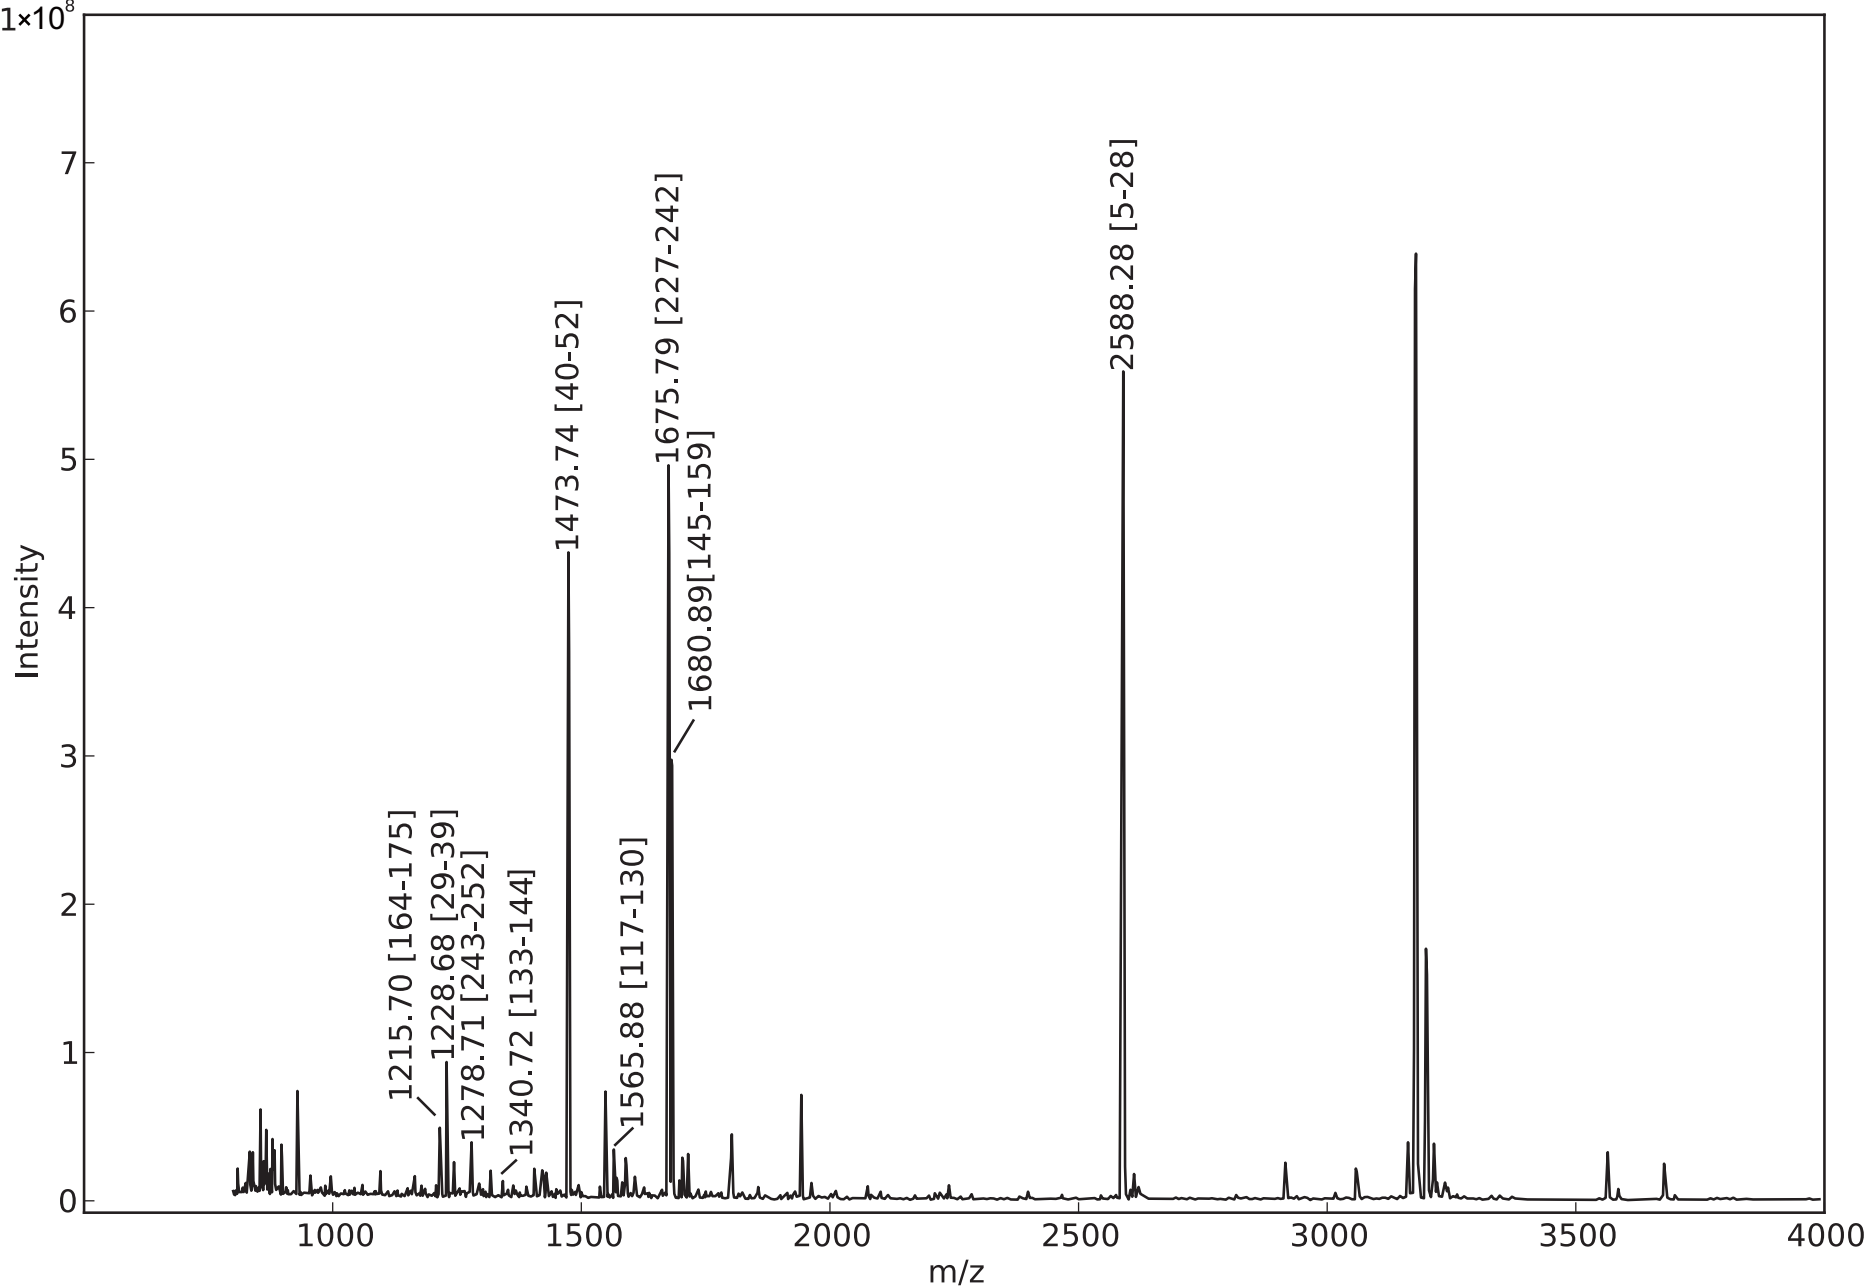

Spot No. 27

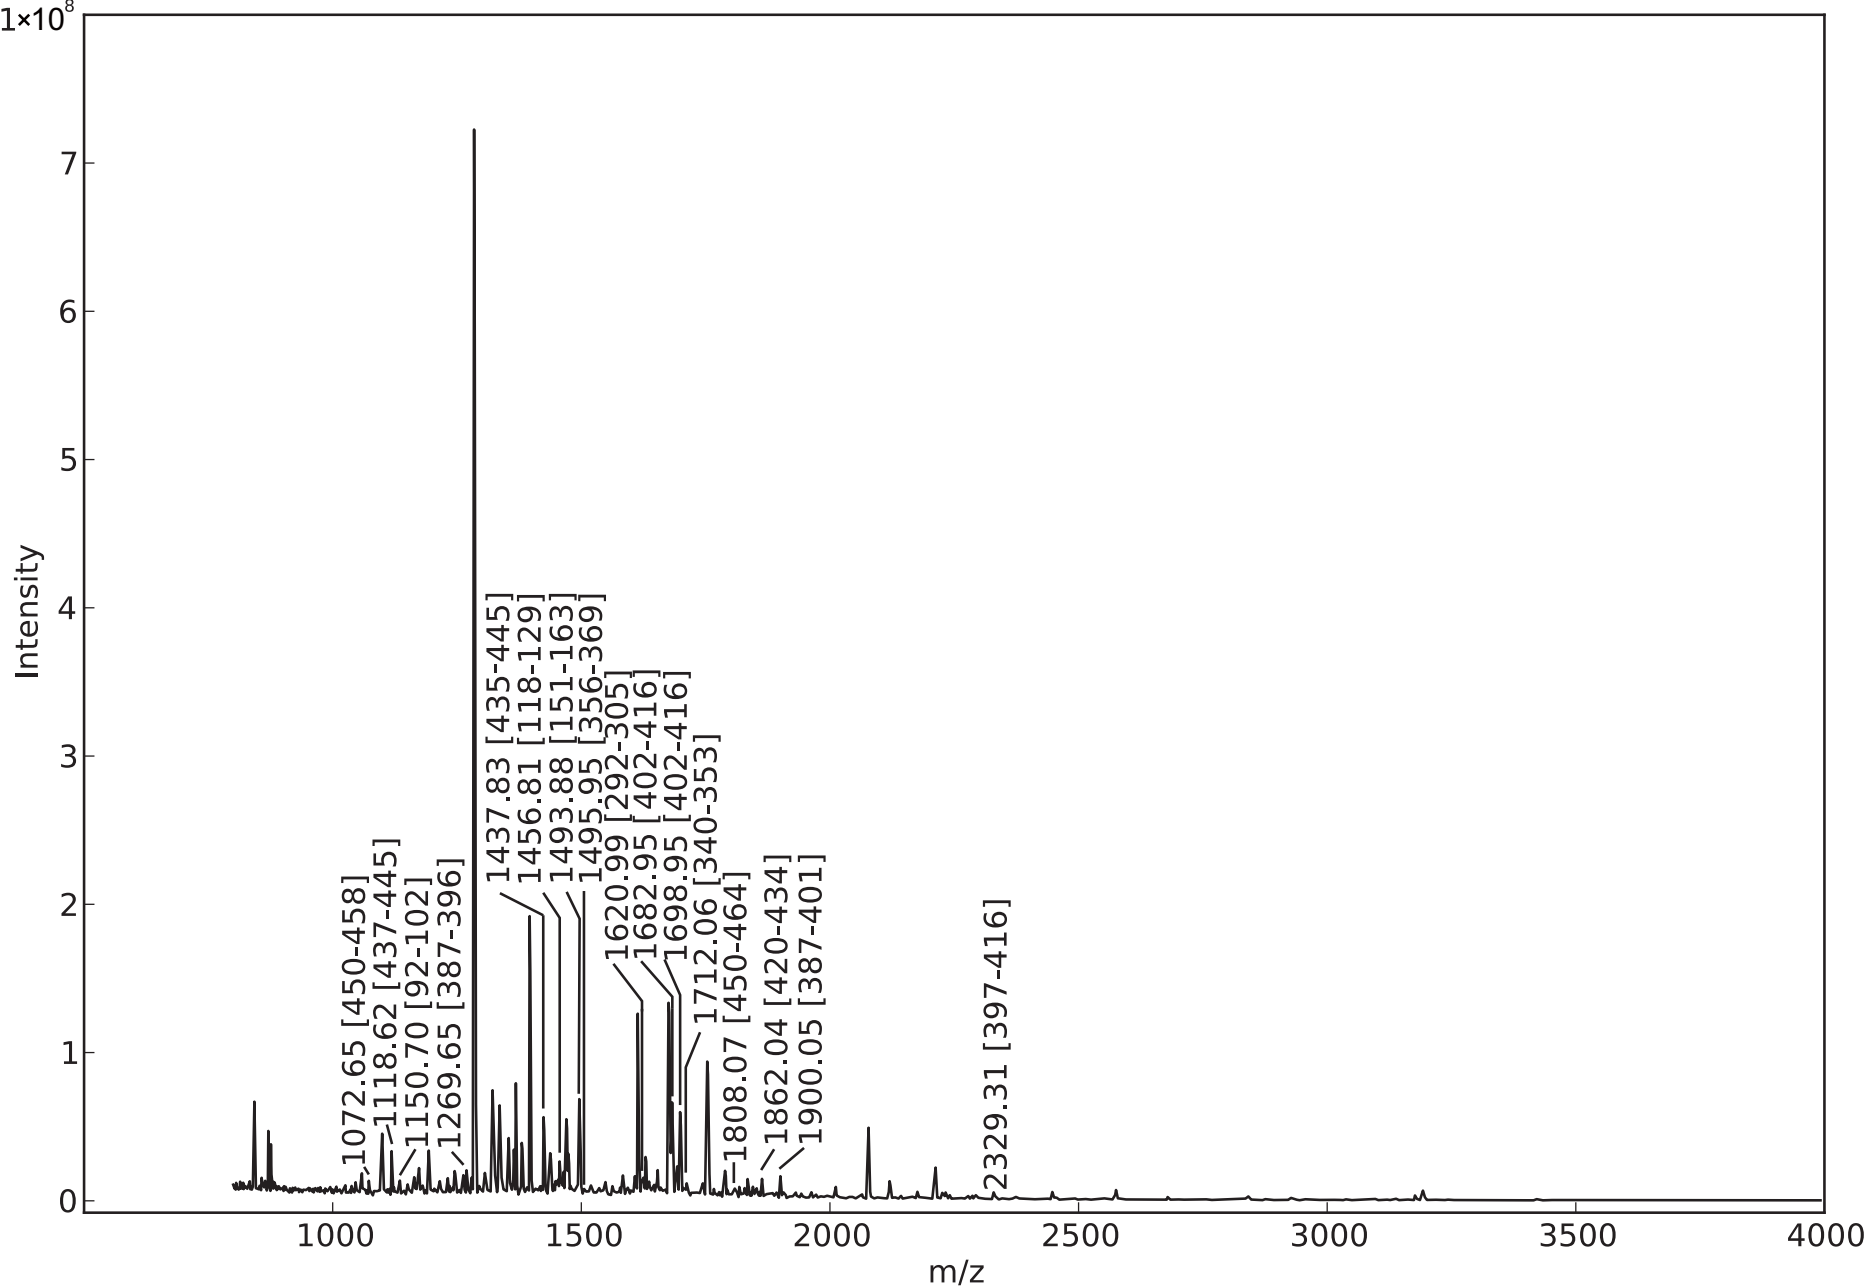

Spot No. 28

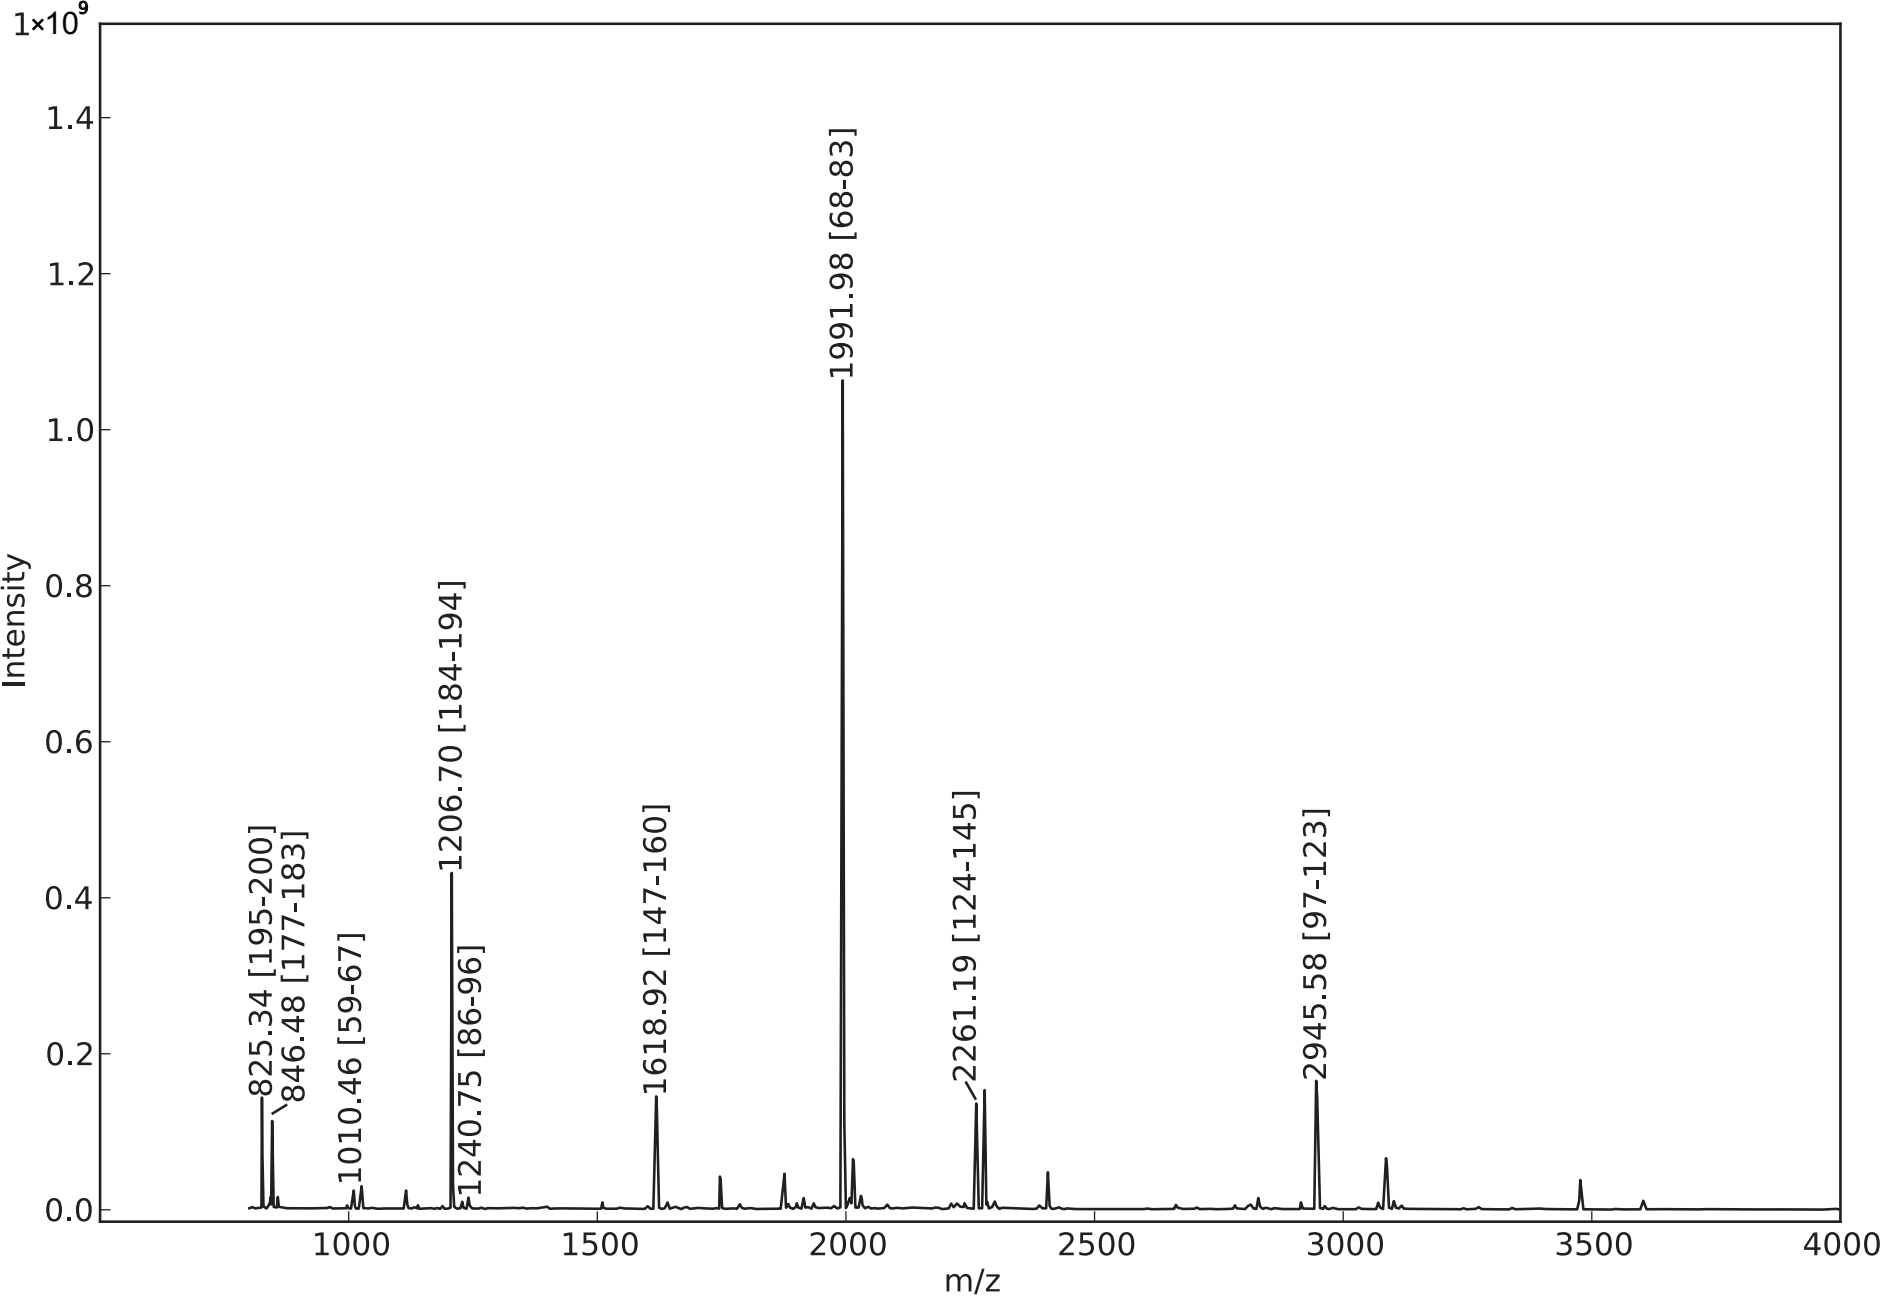

Spot No. 29

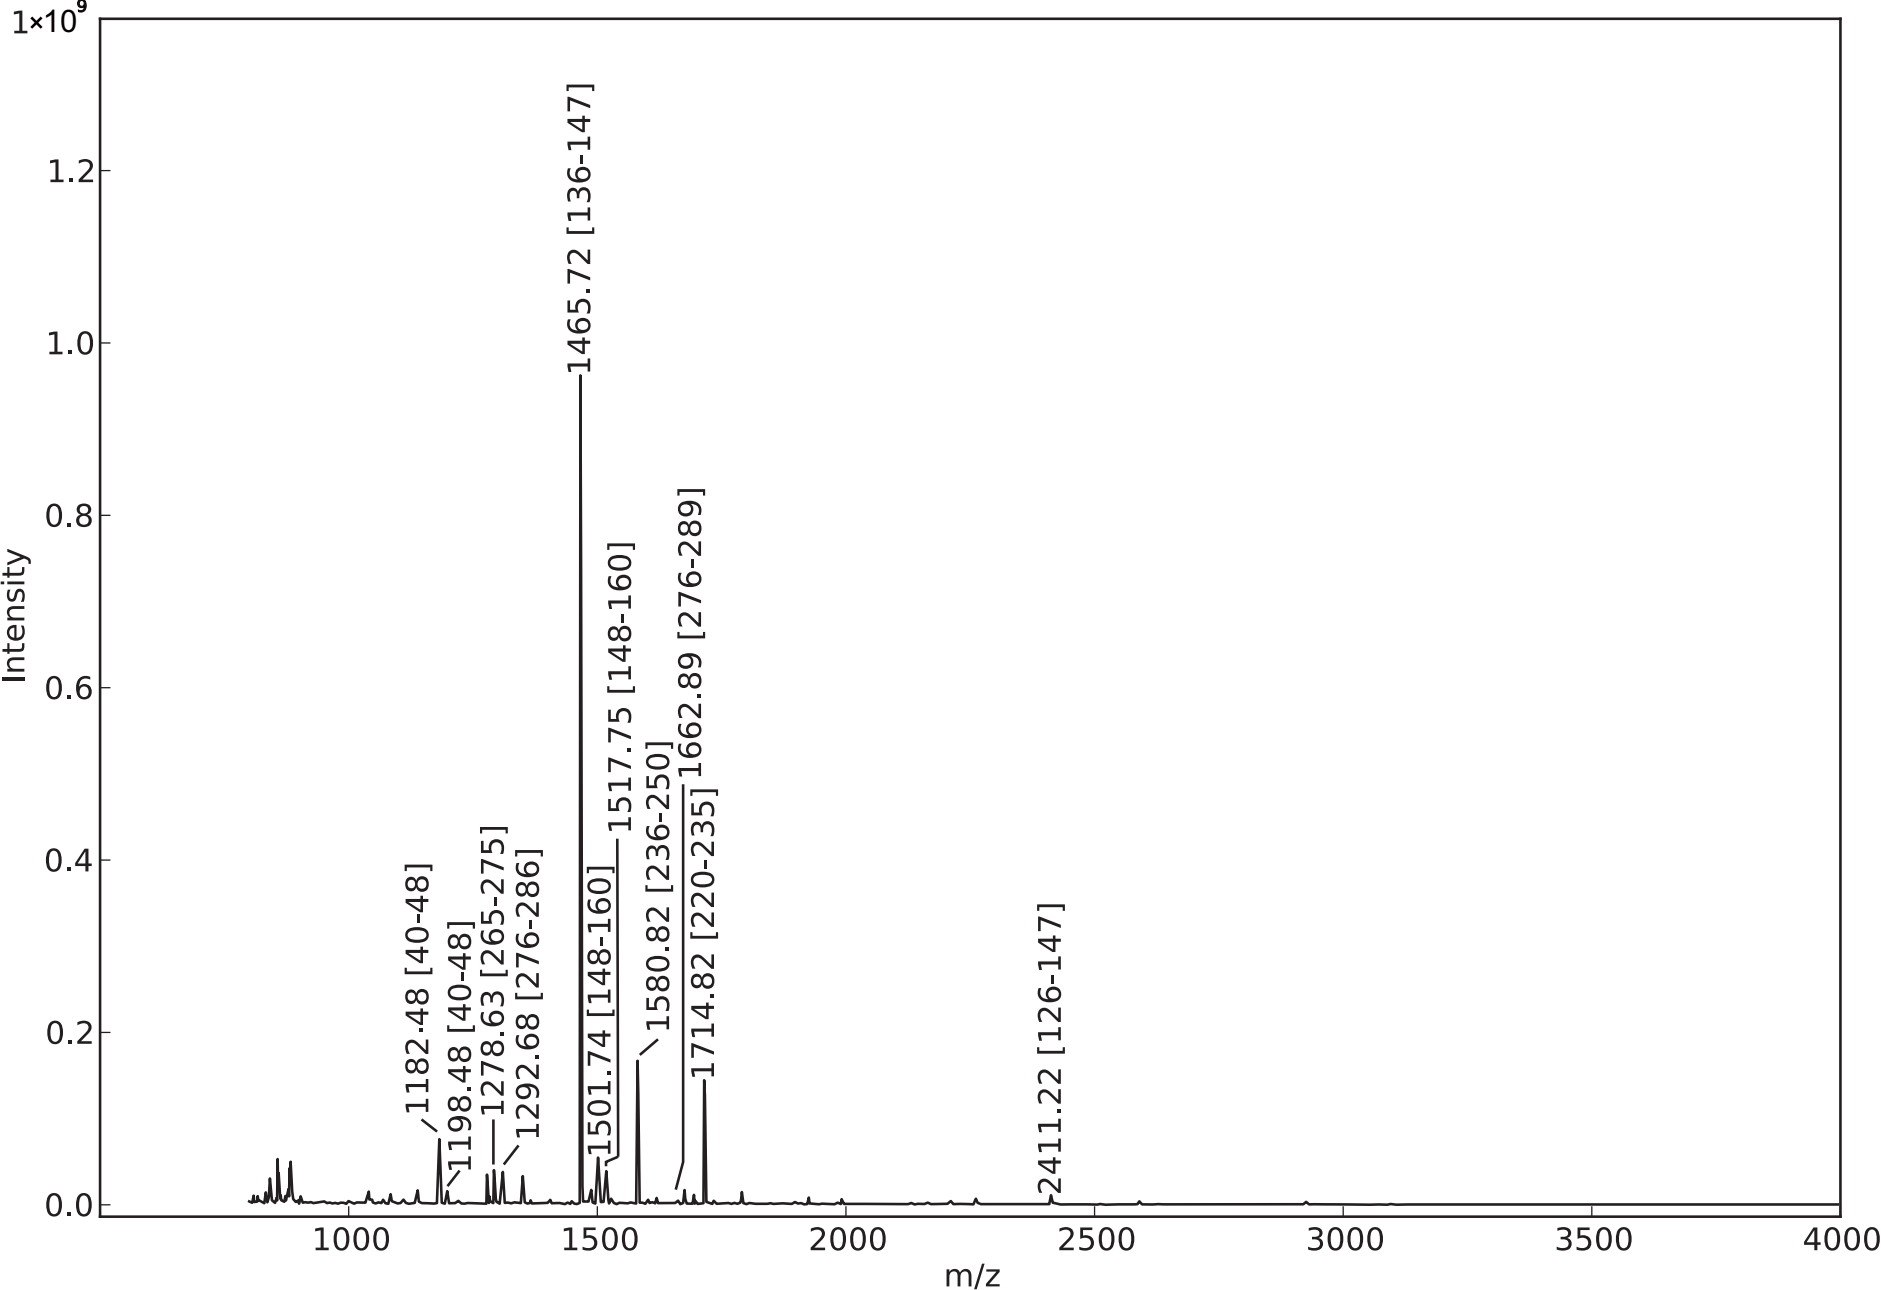

Spot No. 30

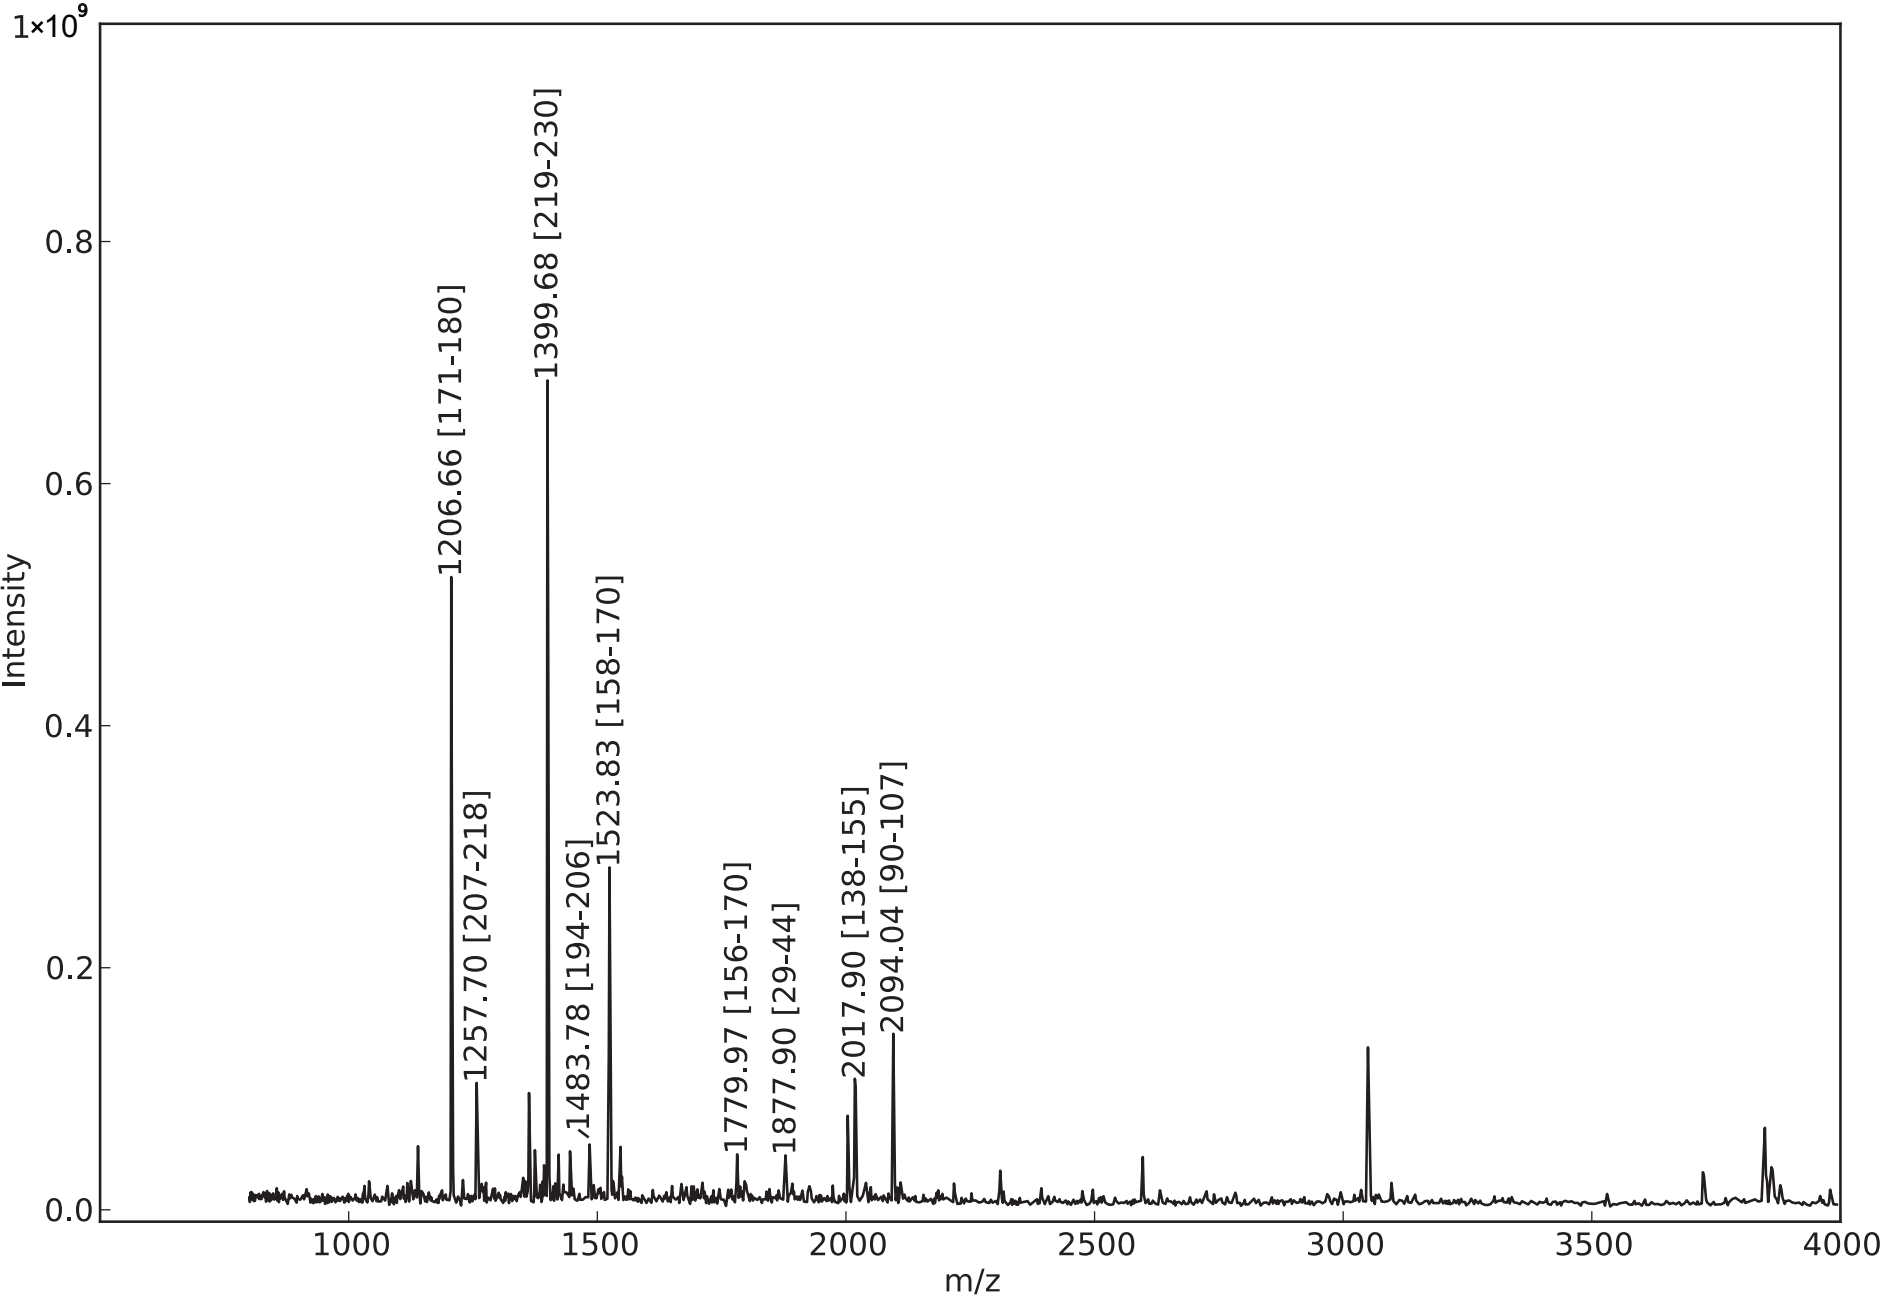



Spot No. 31

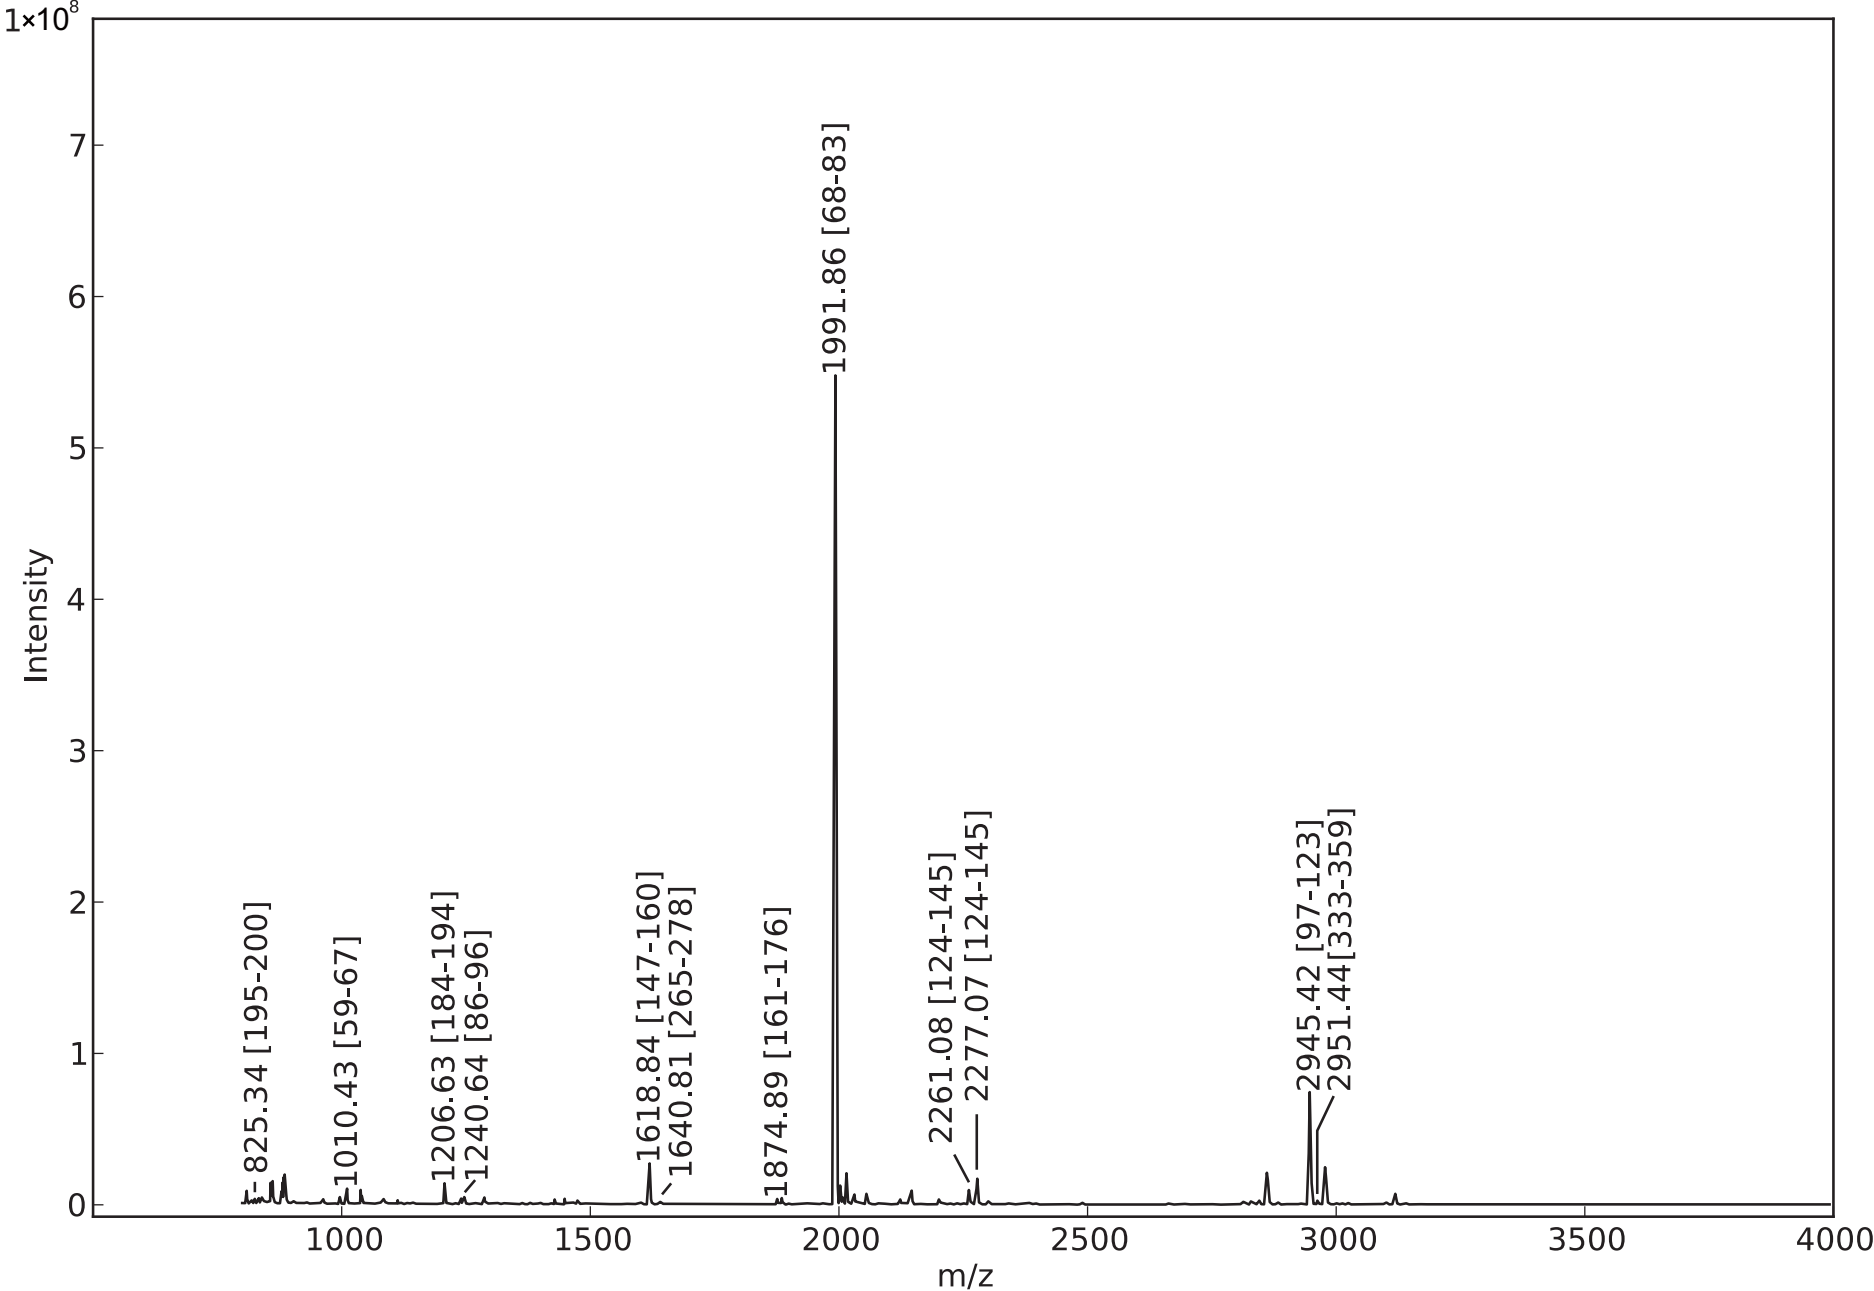

Spot No. 32

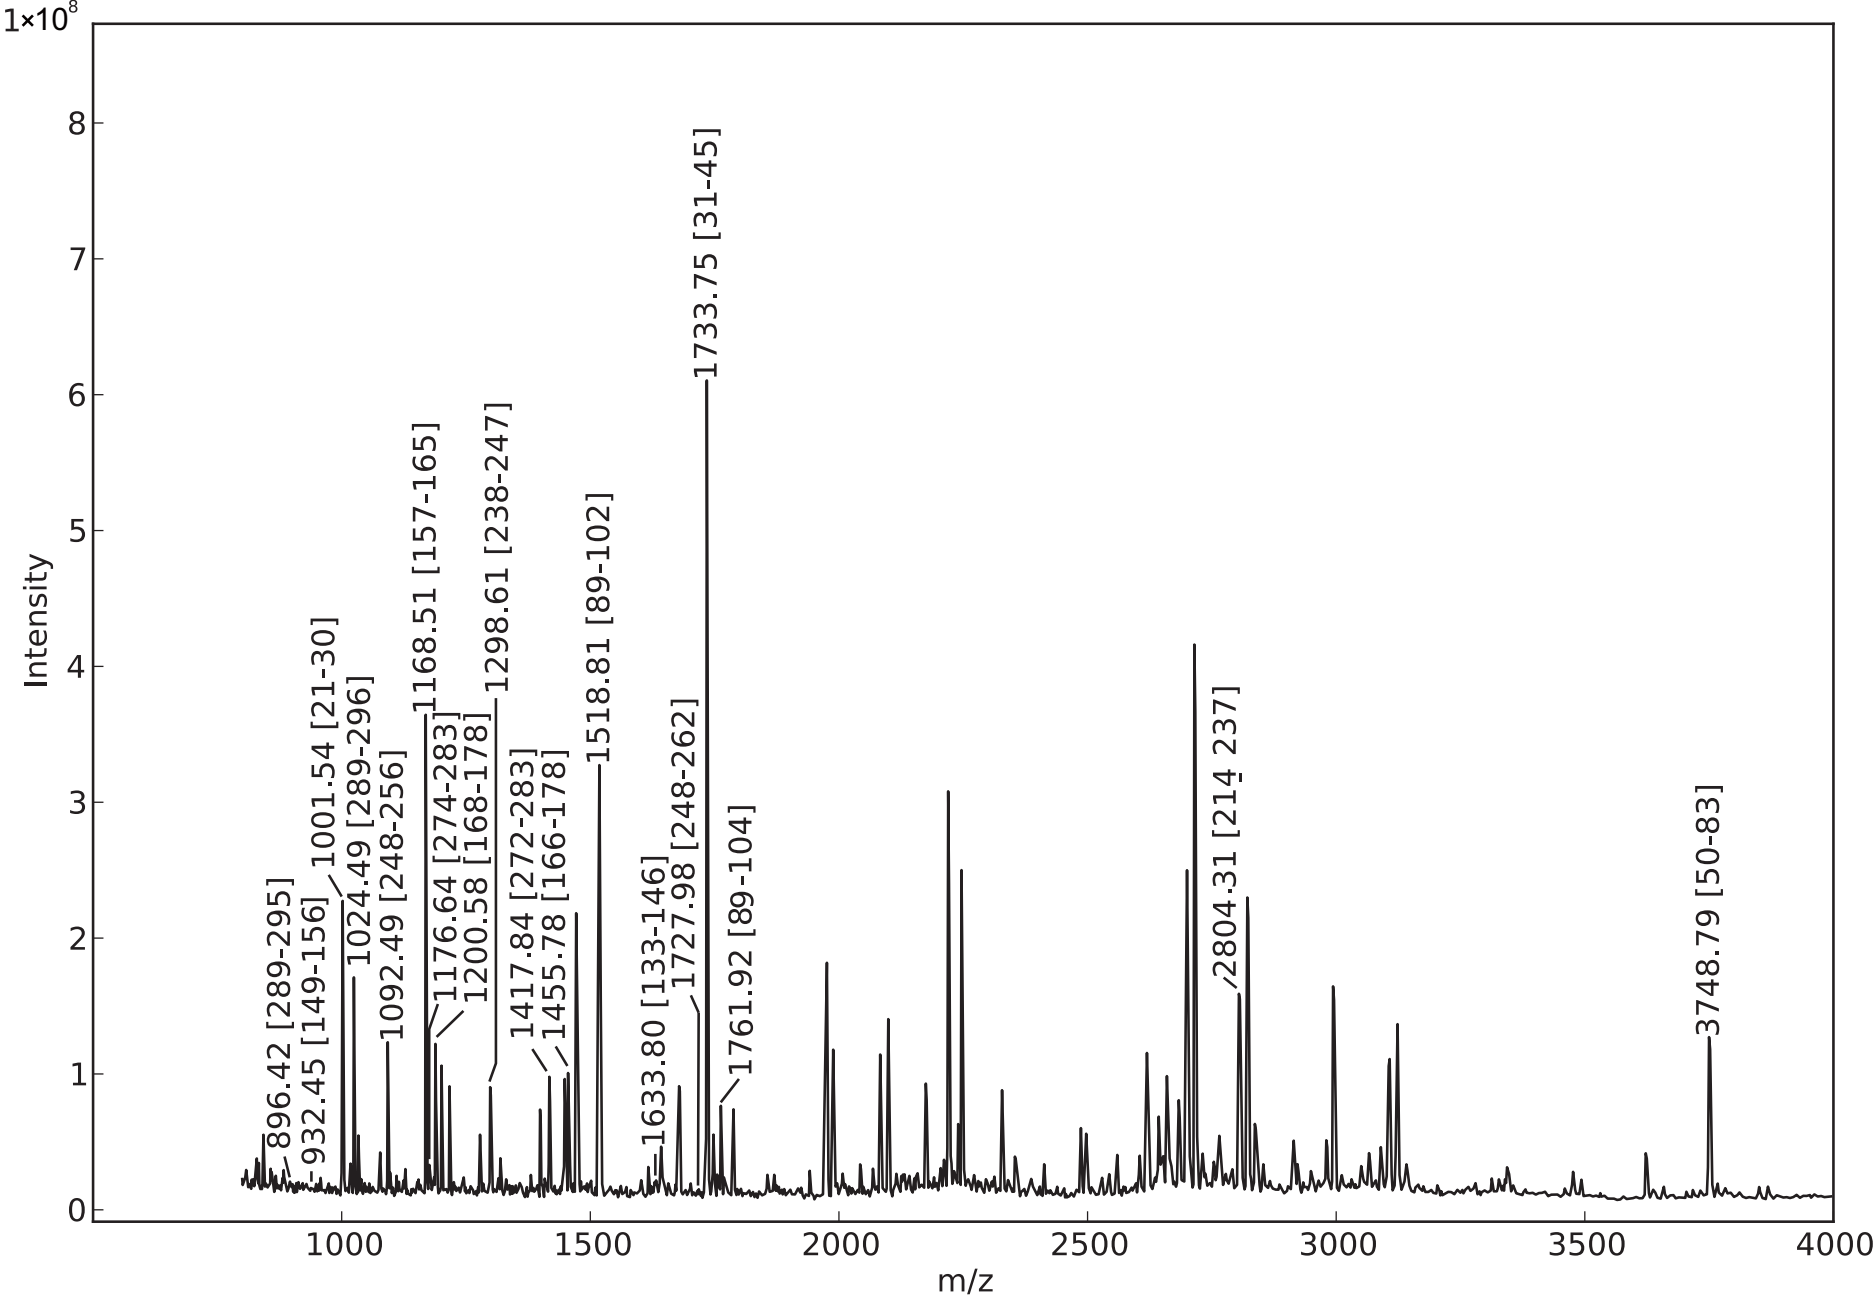

Spot No. 33

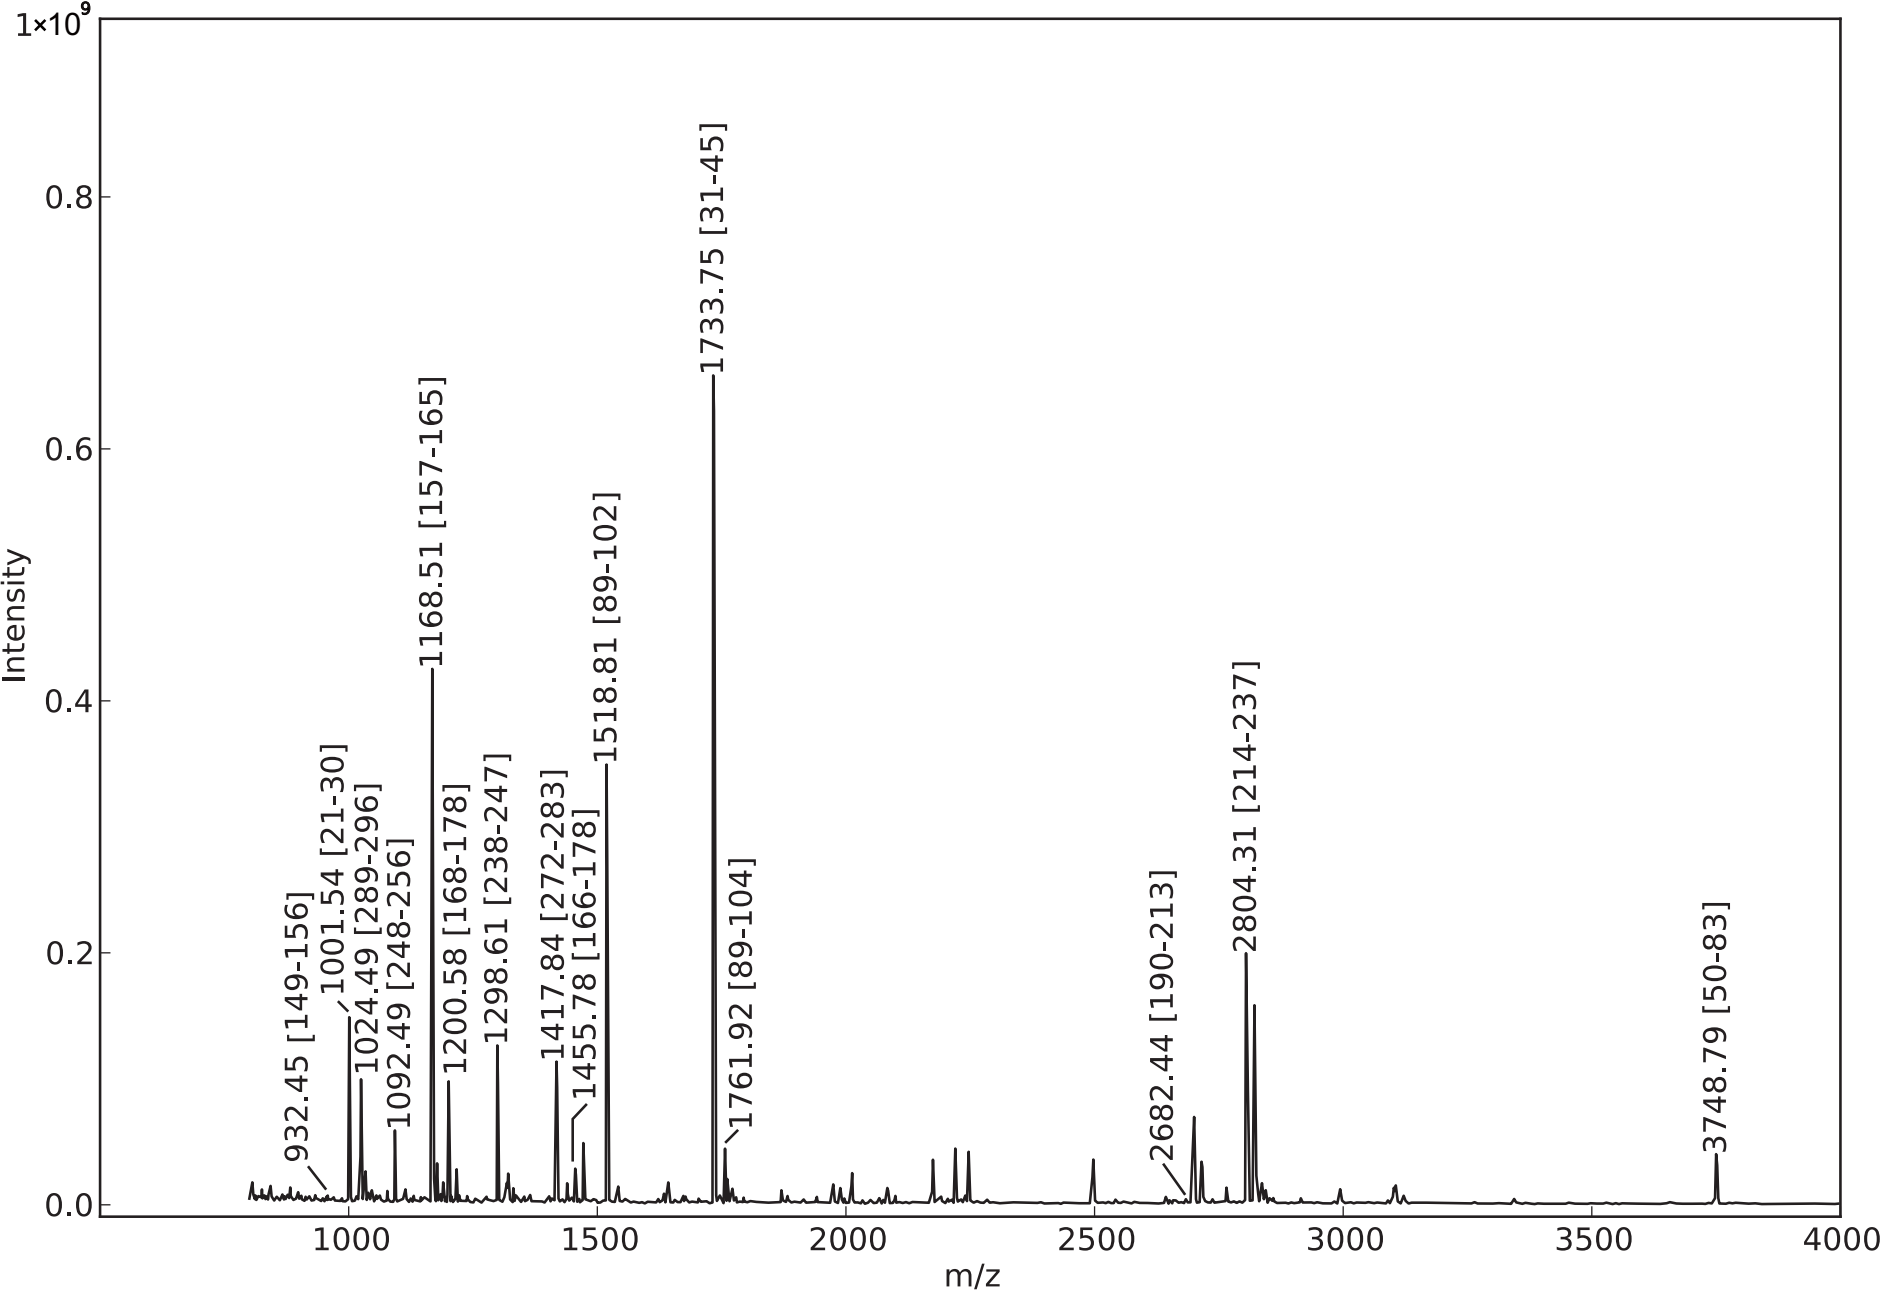

Spot No. 34

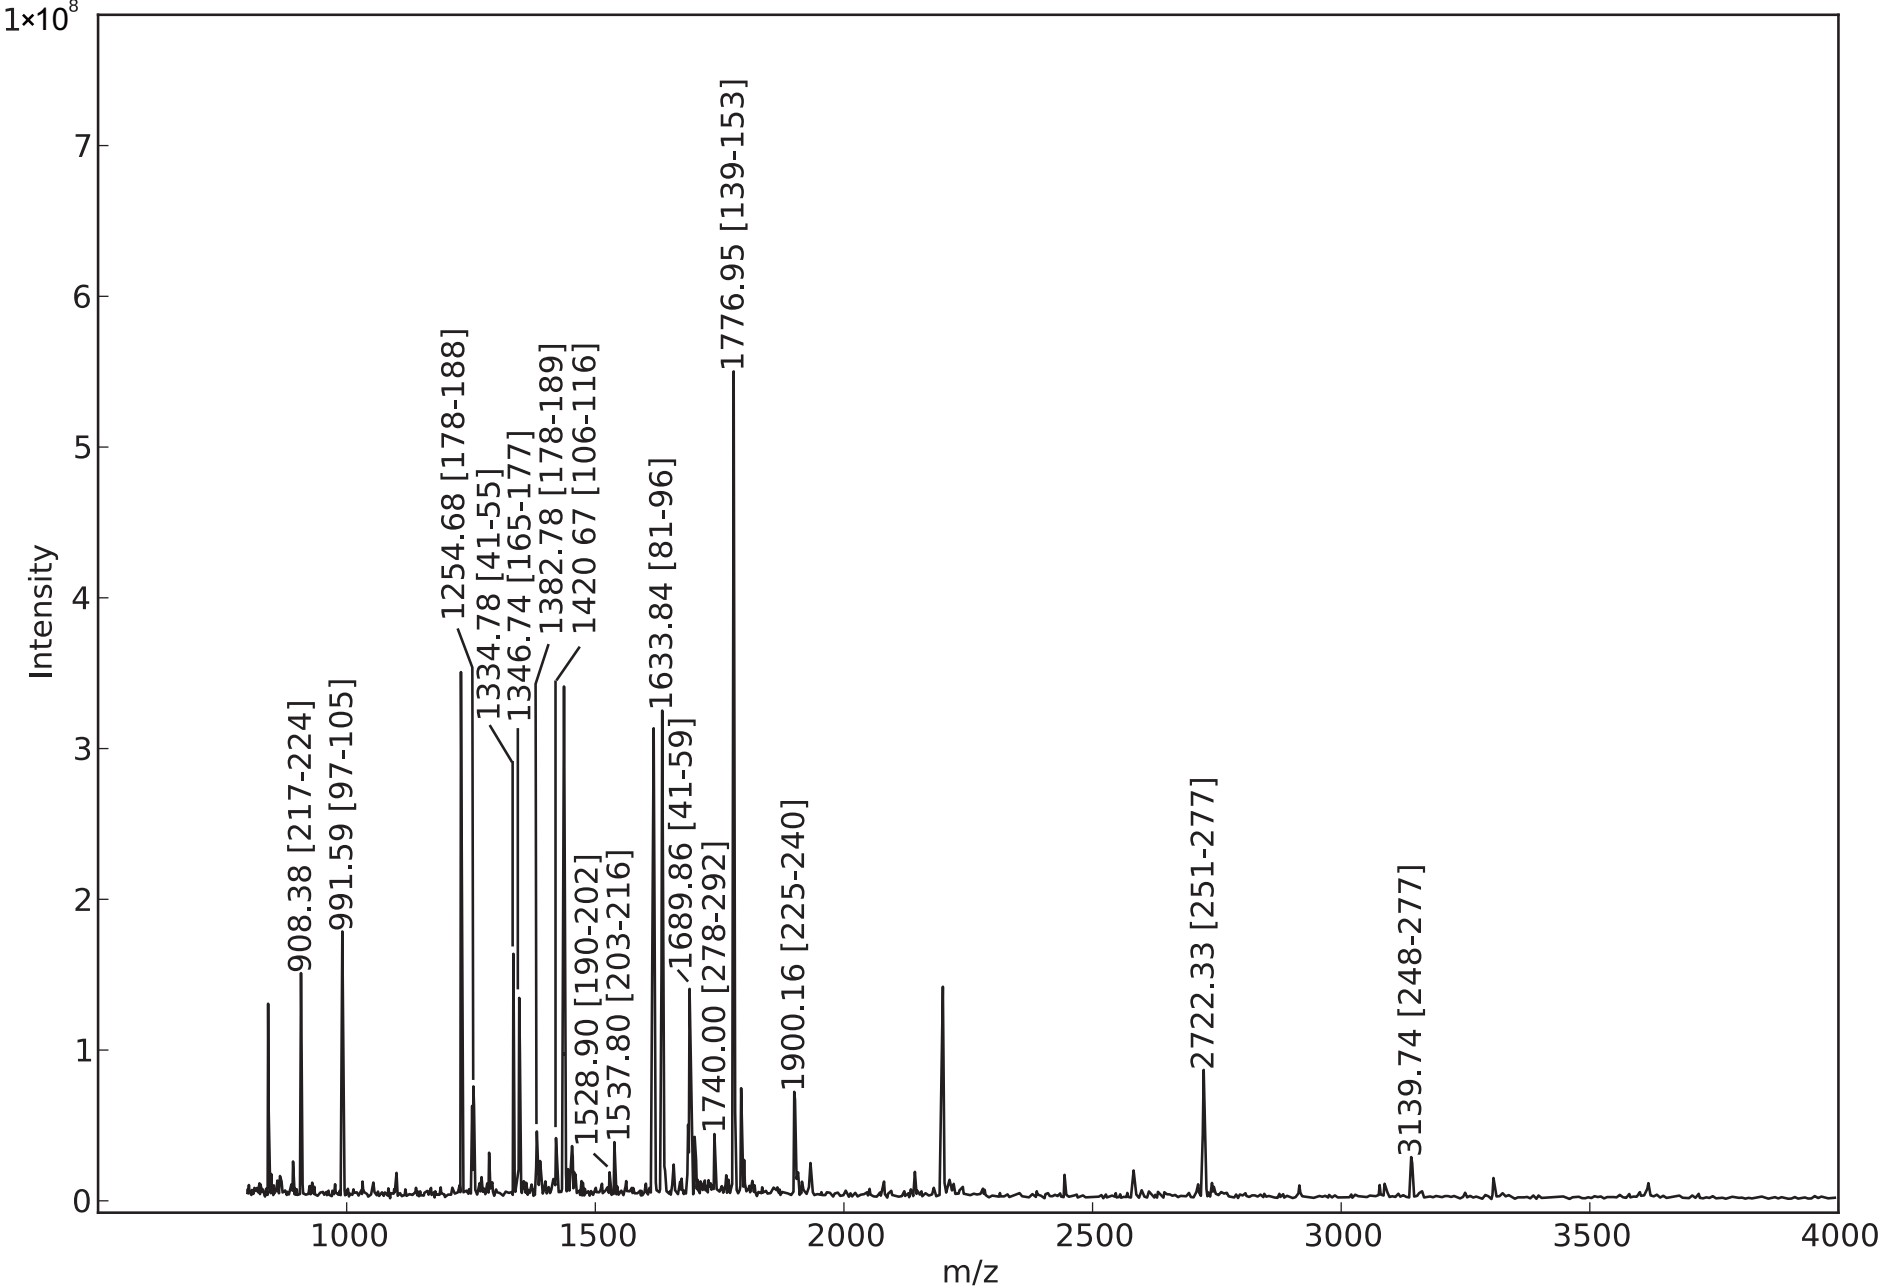

Spot No. 35

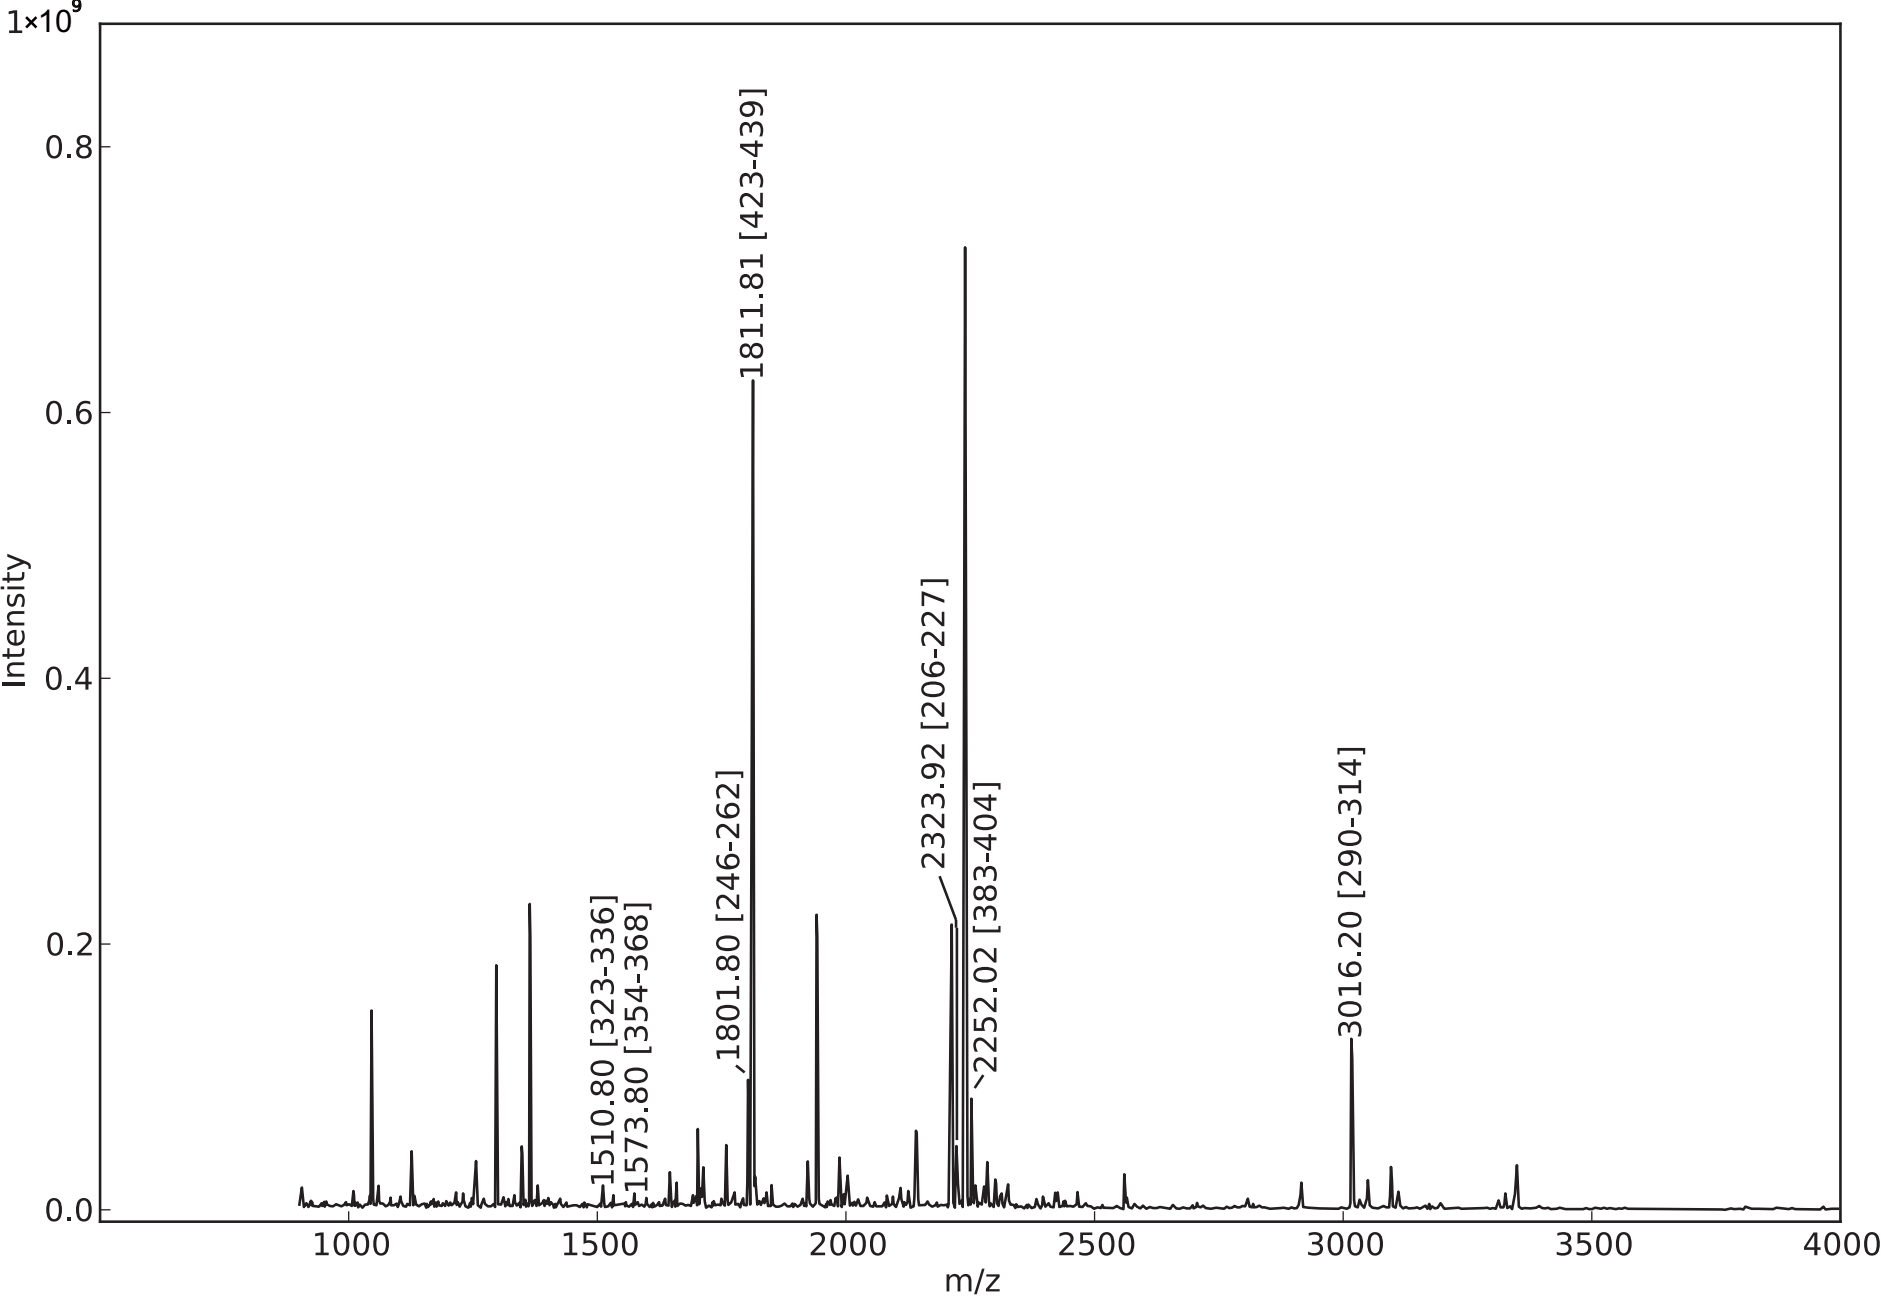

Spot No. 36

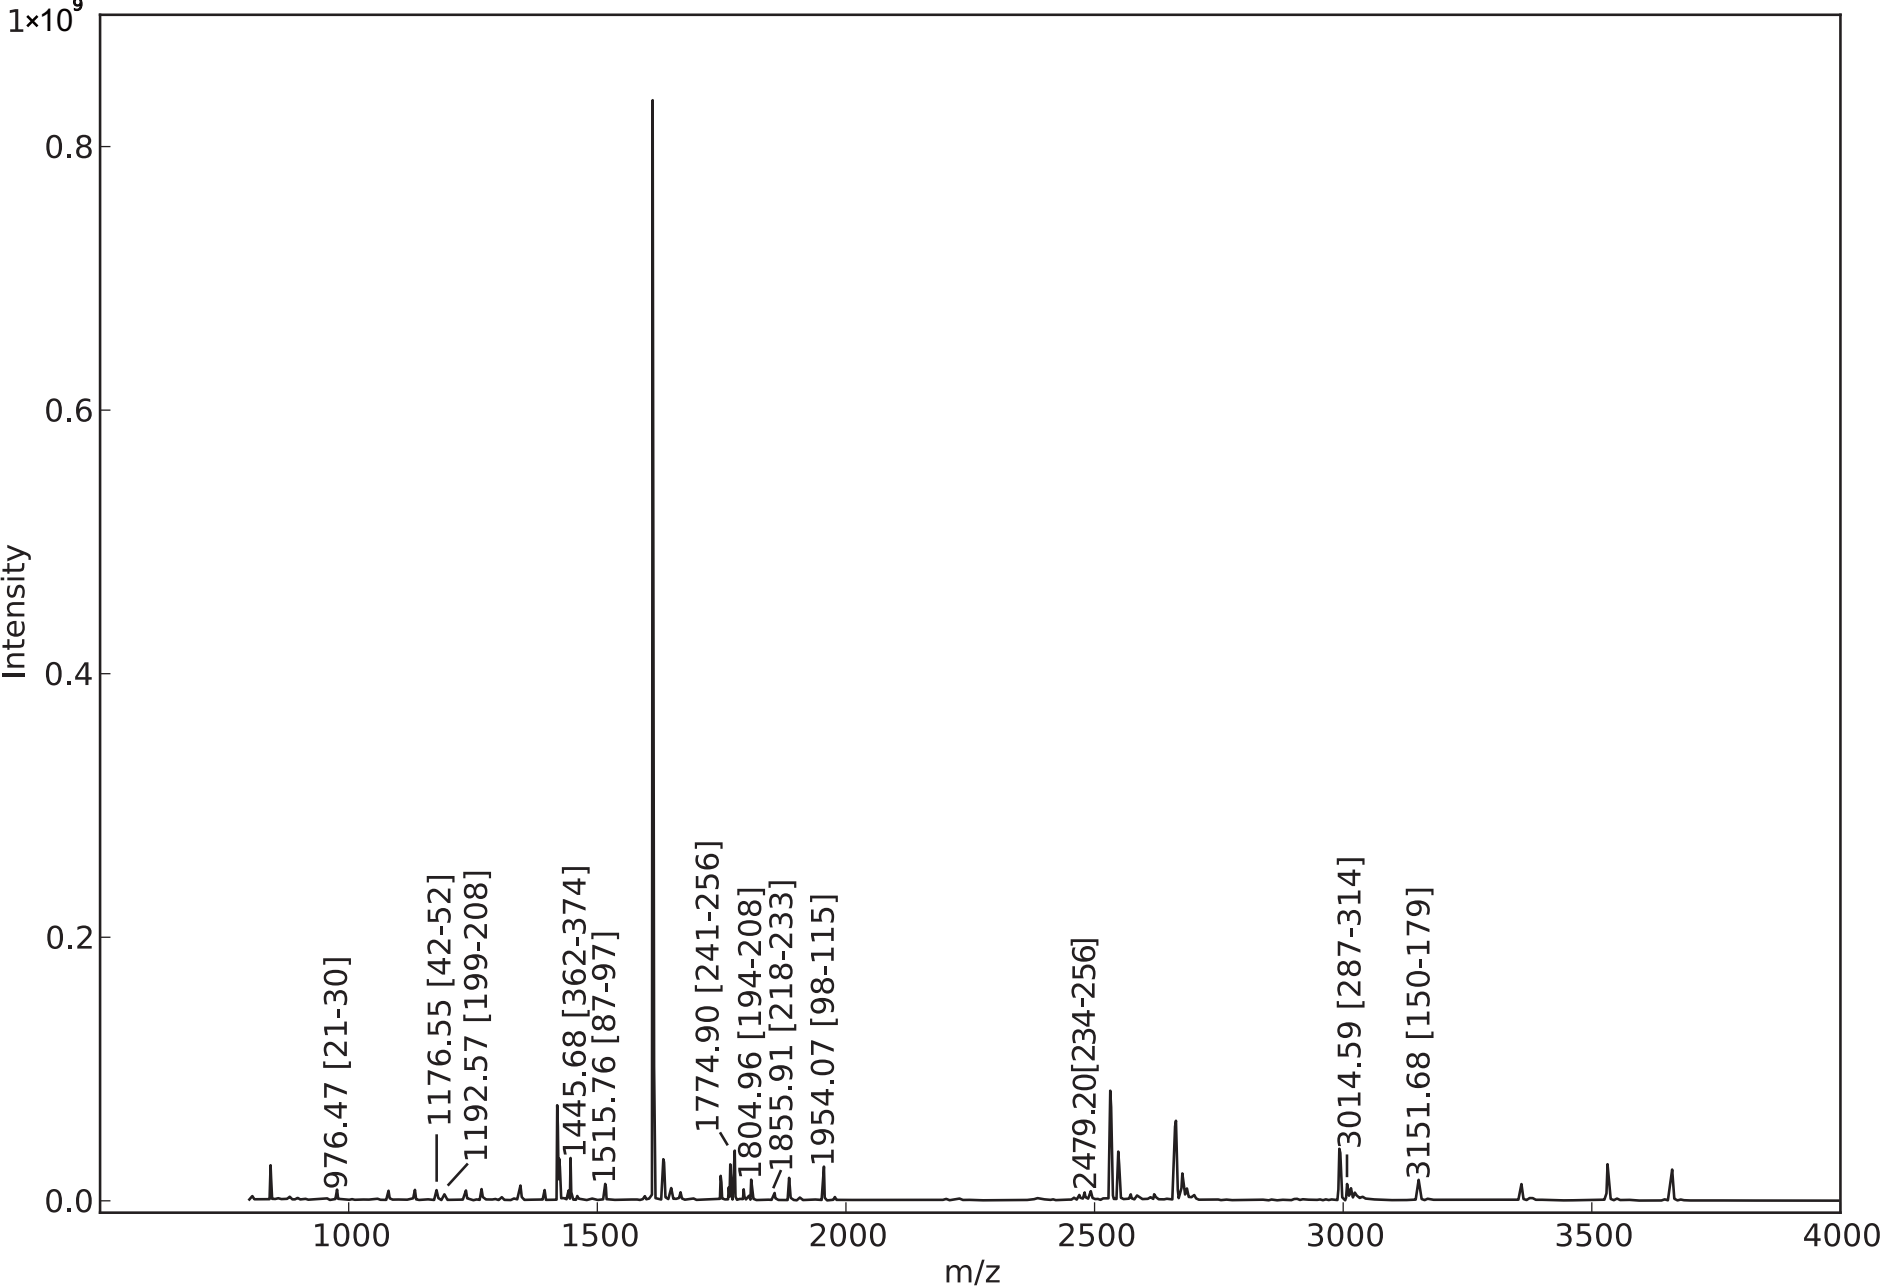

Spot No. 37

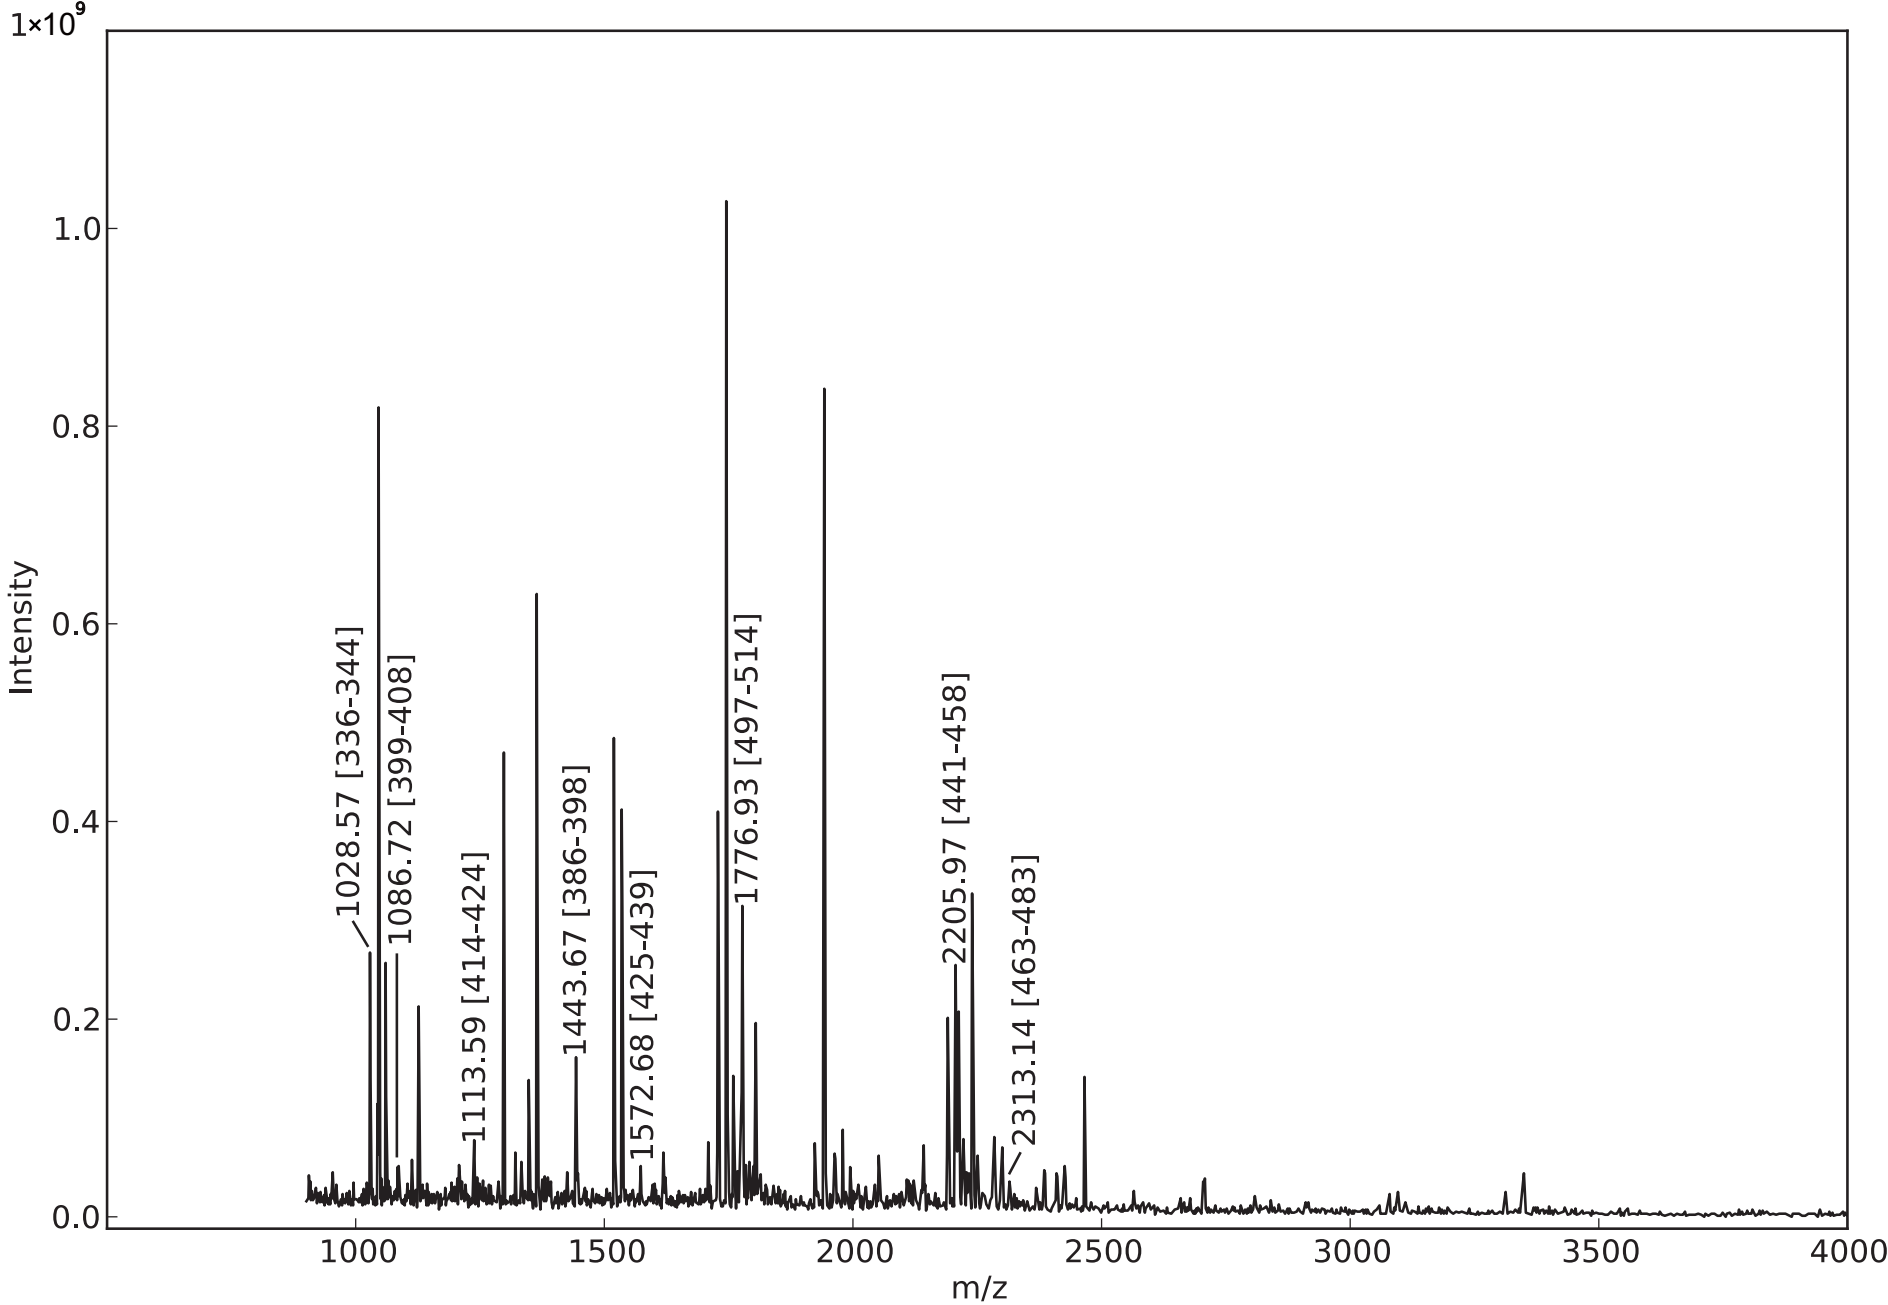

Spot No. 38

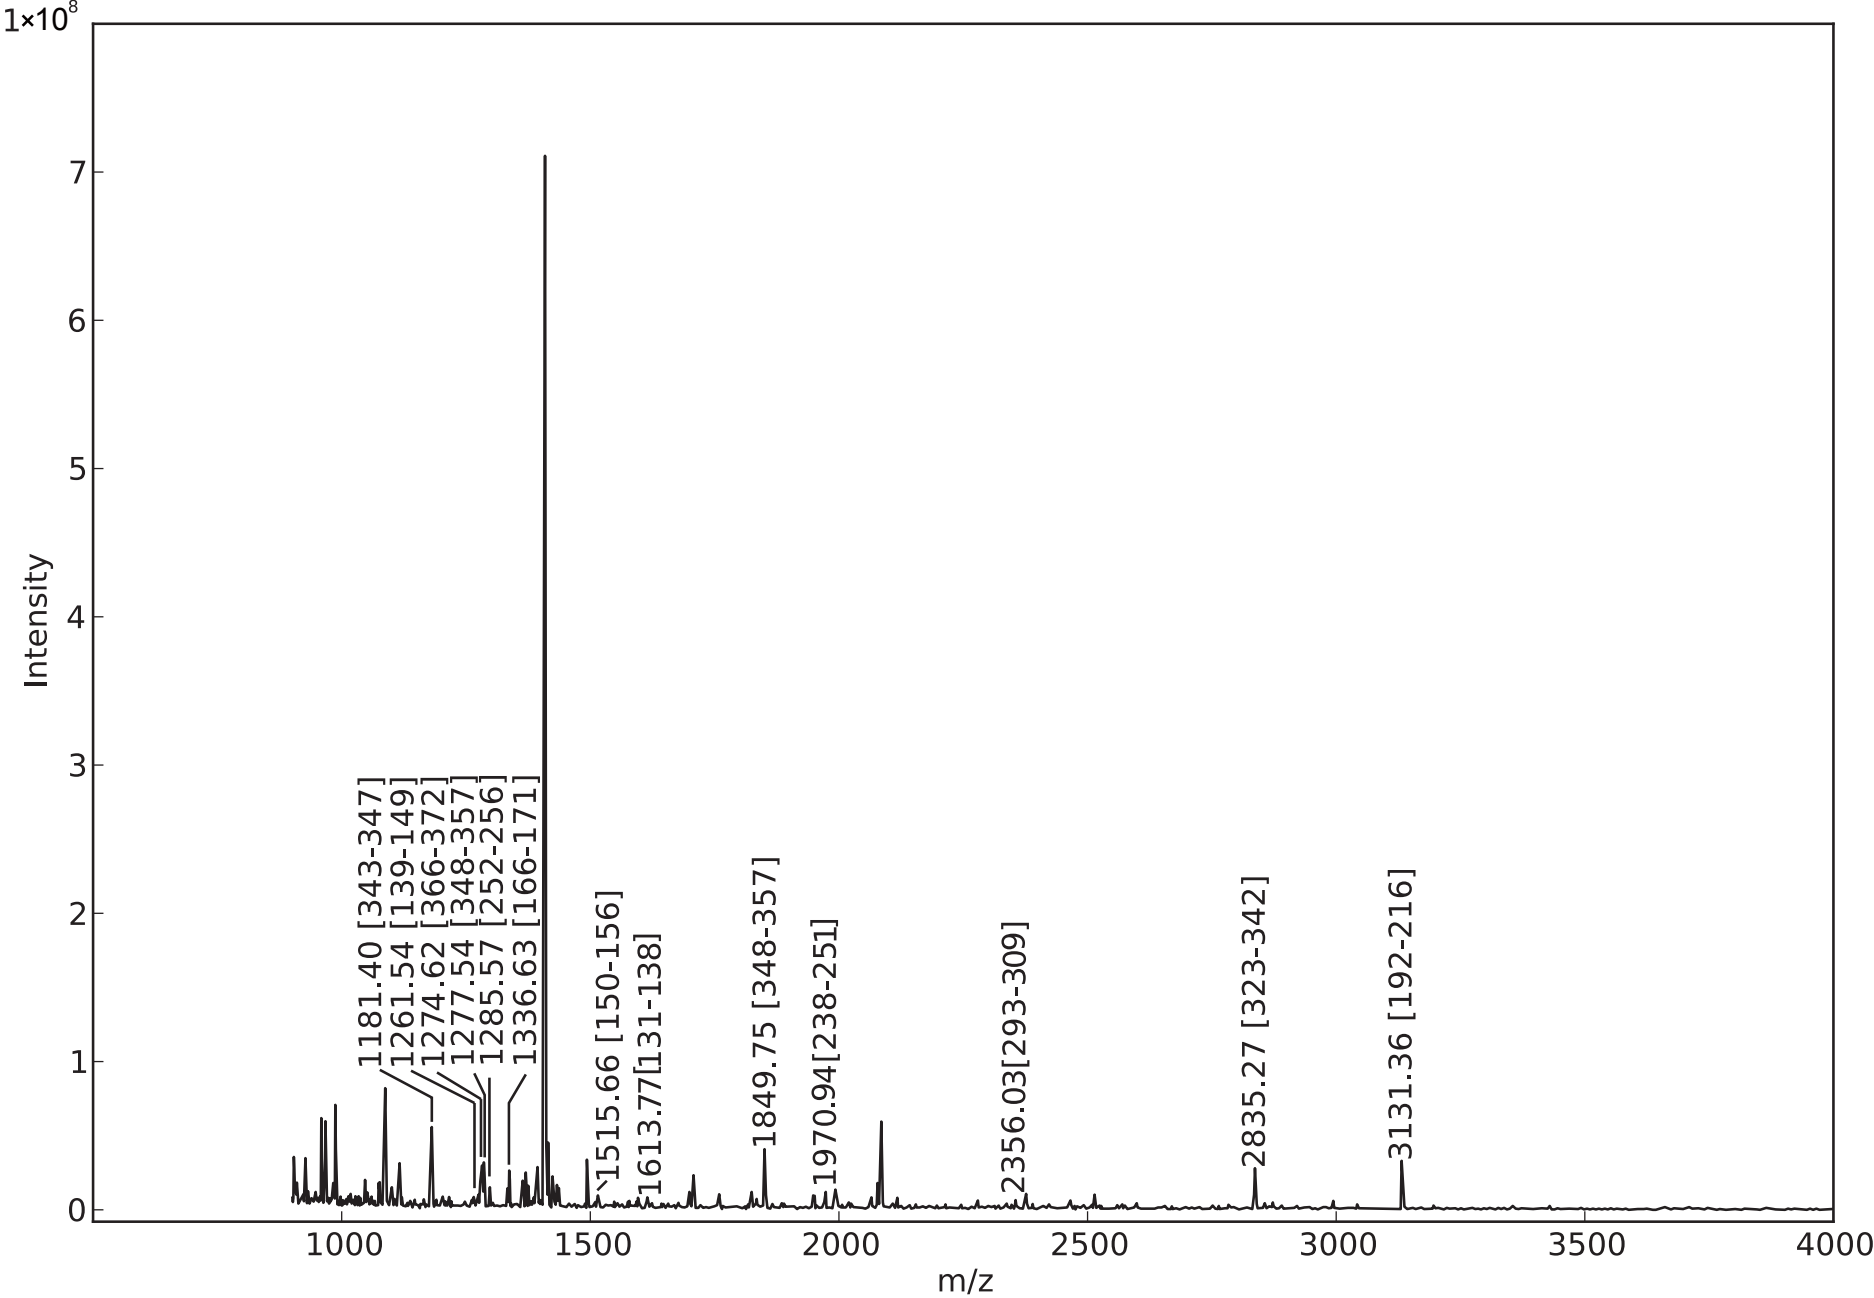



Spot No. 39

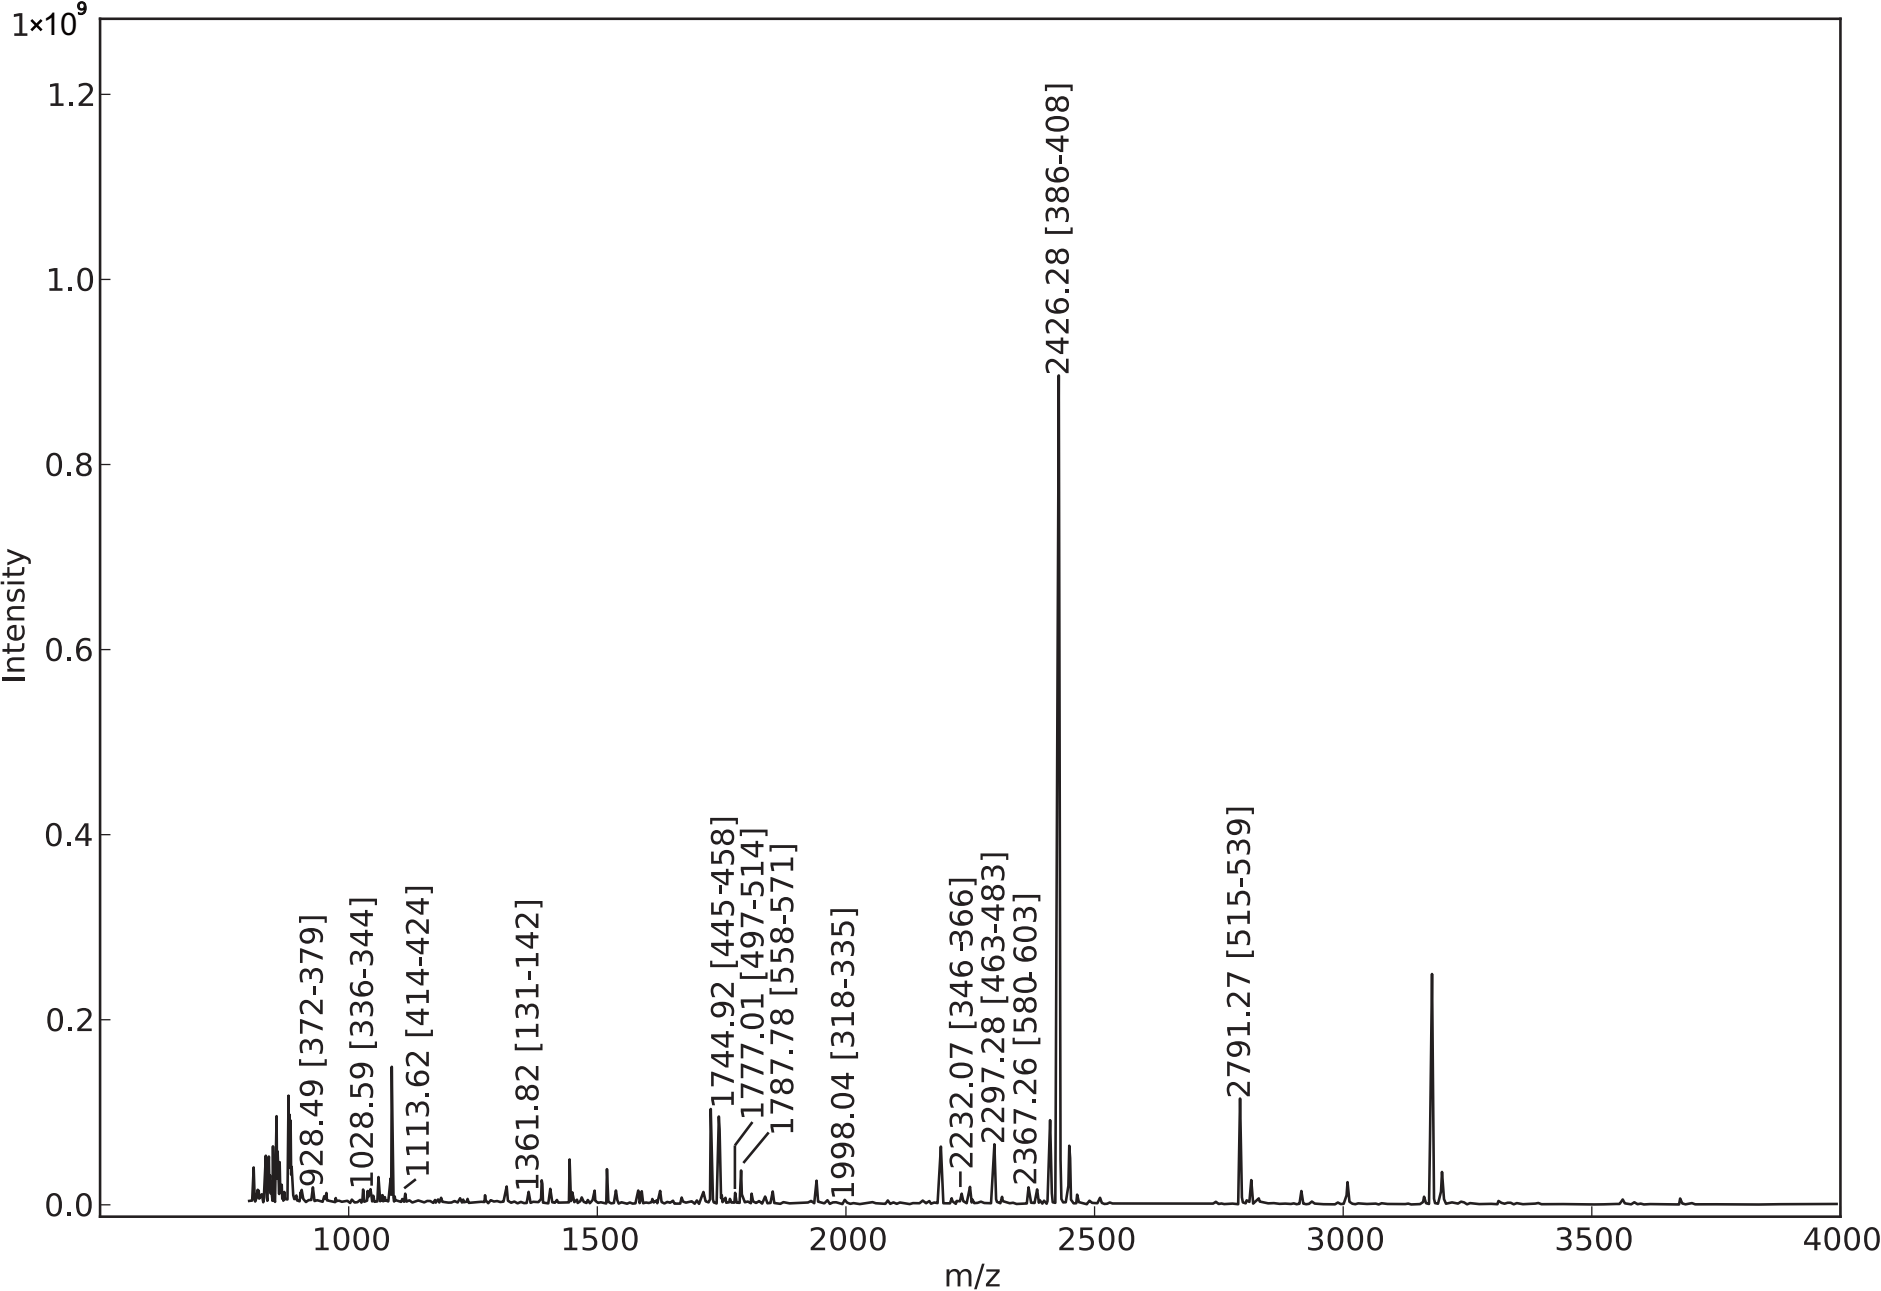

Spot No. 40

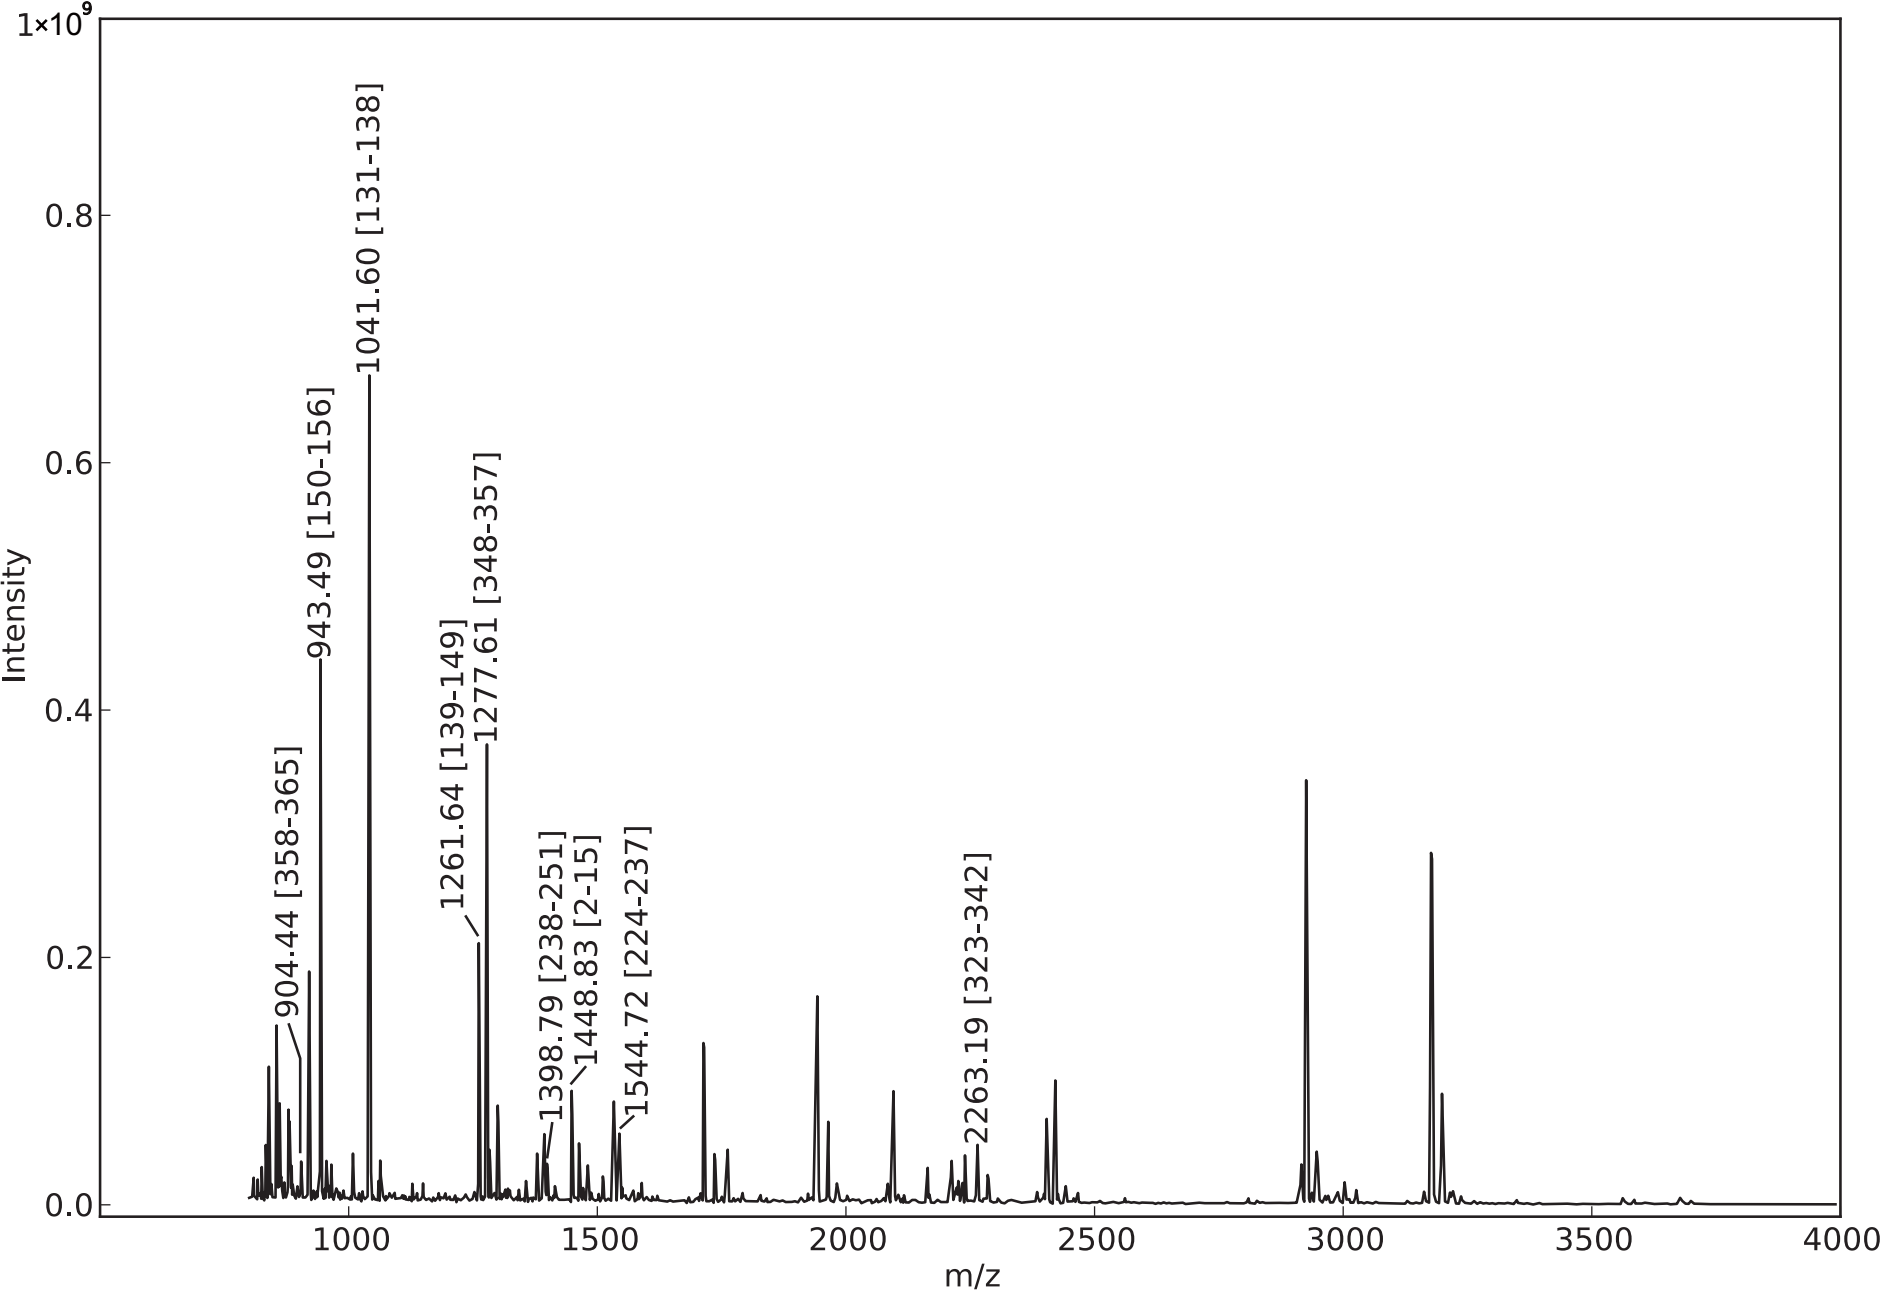

Spot No. 41

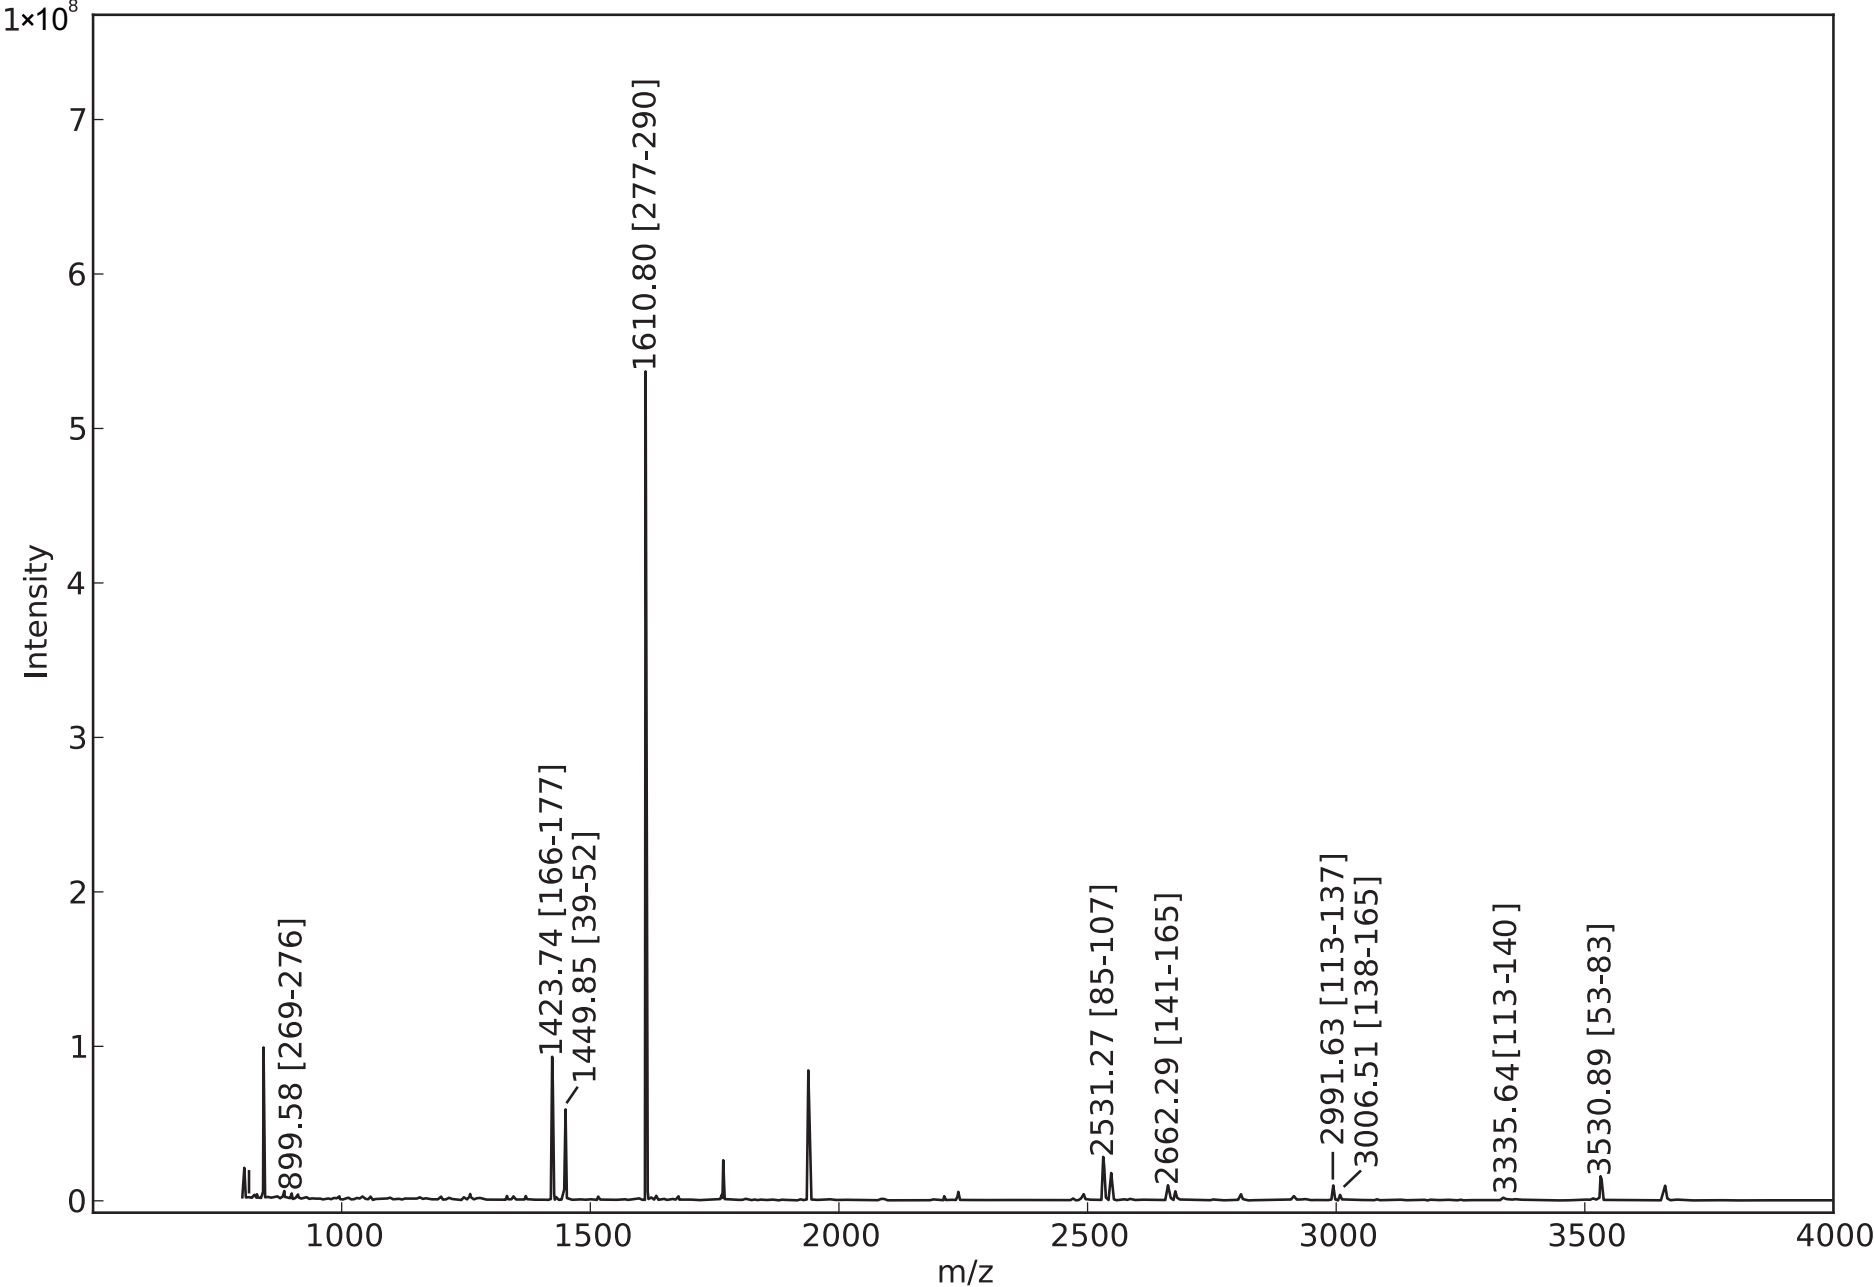

Spot No. 42

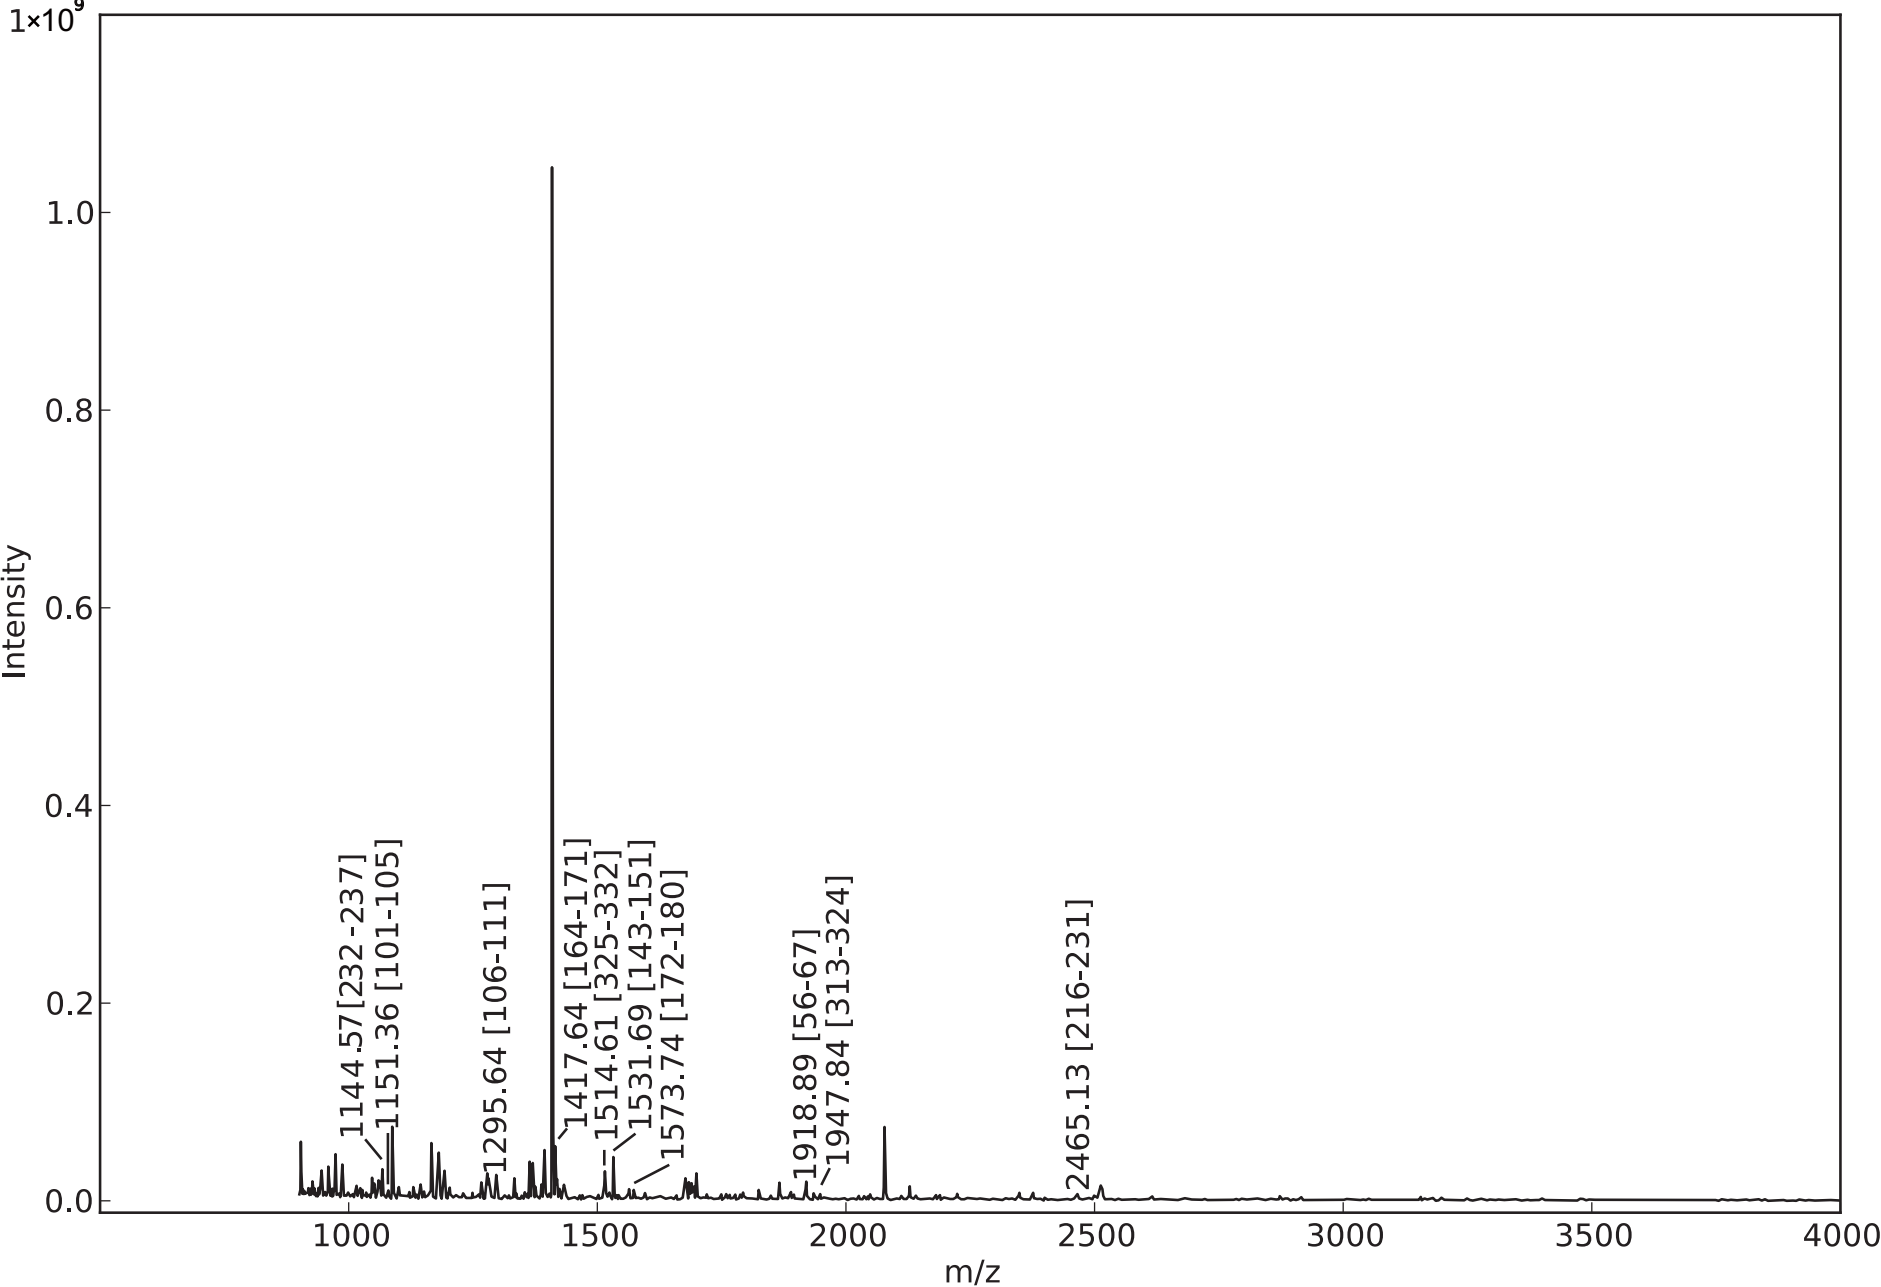

Spot No. 43

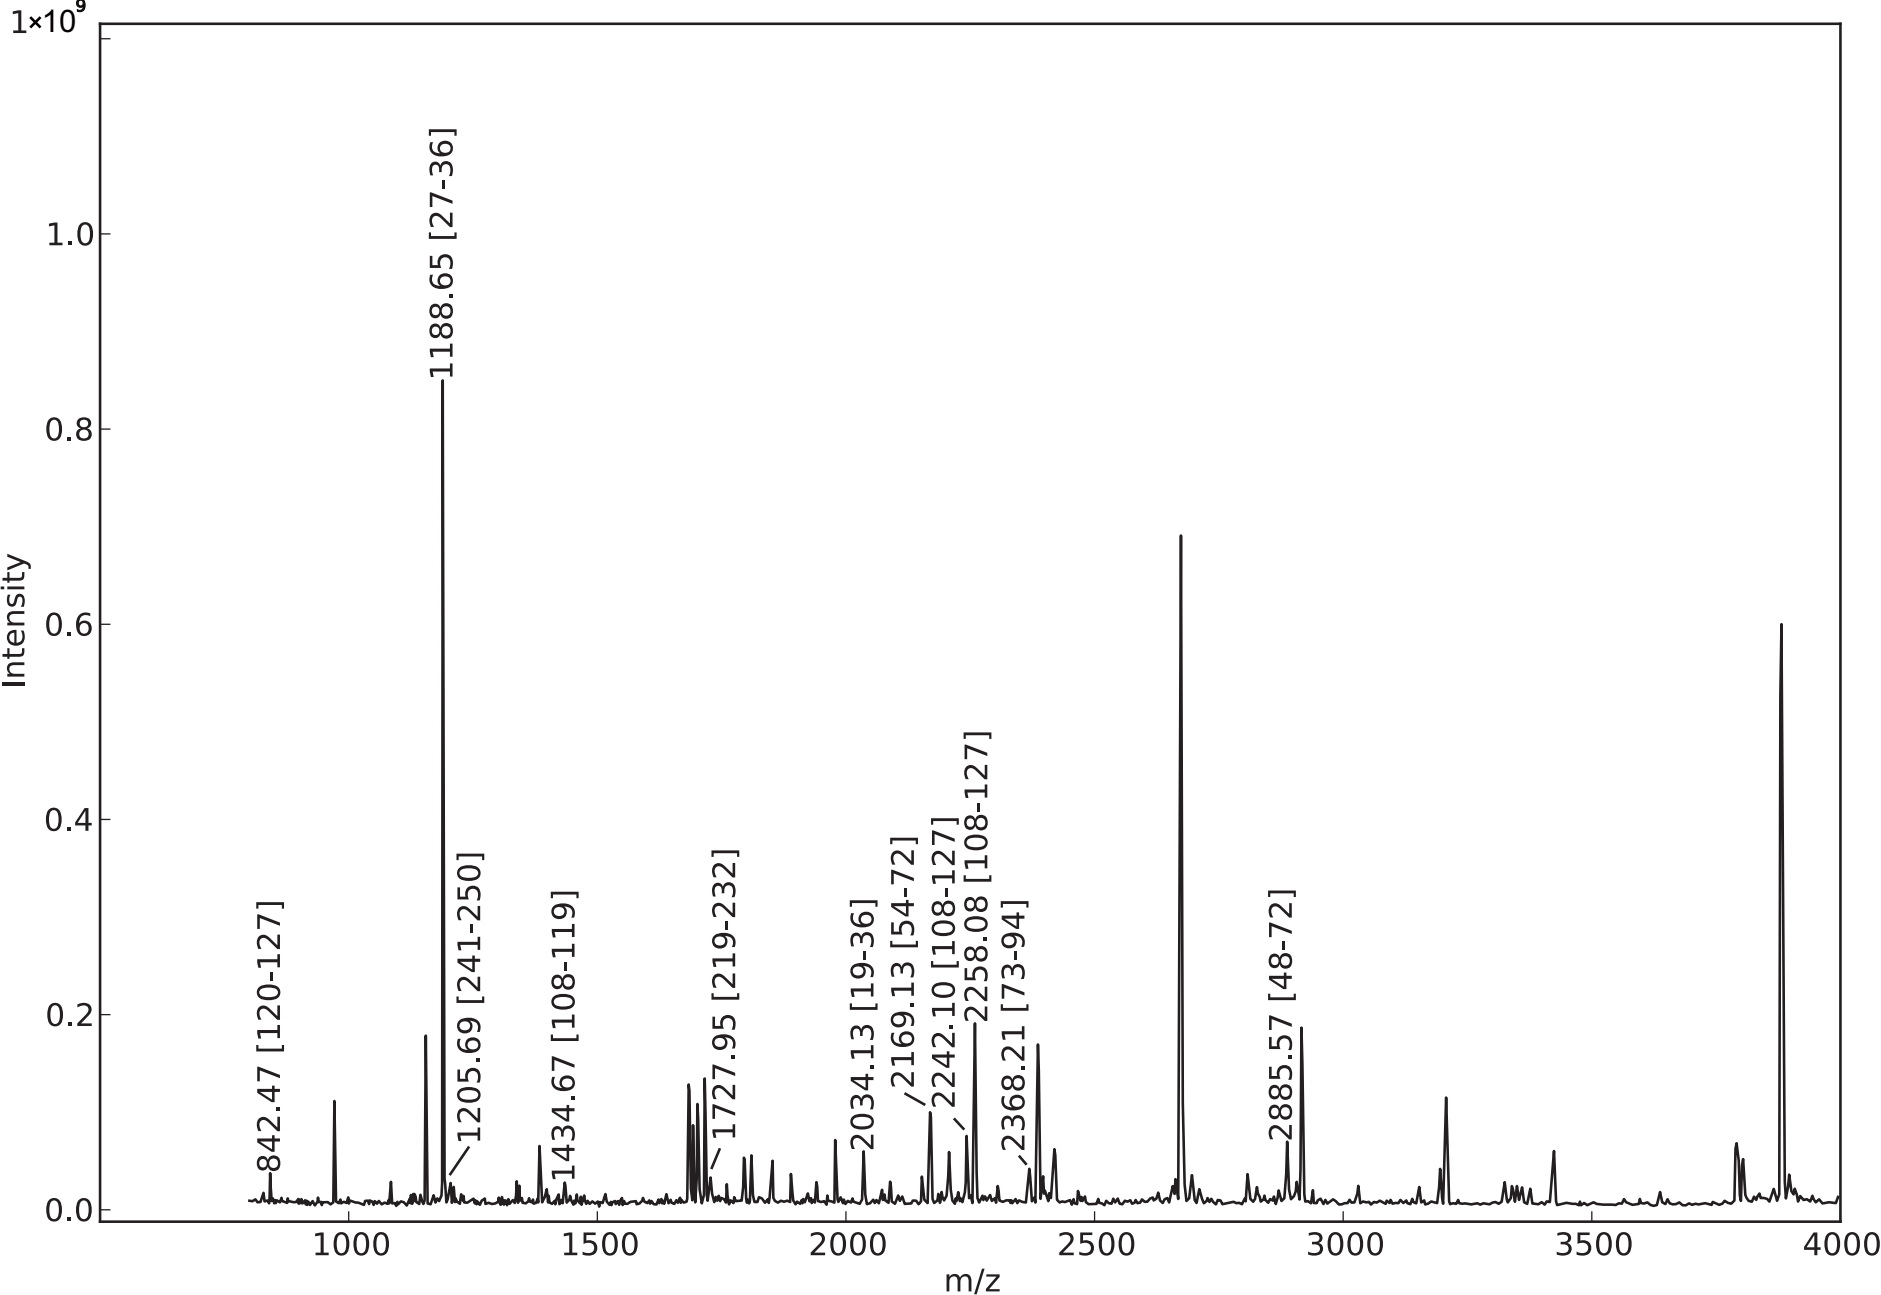

Spot No. 44

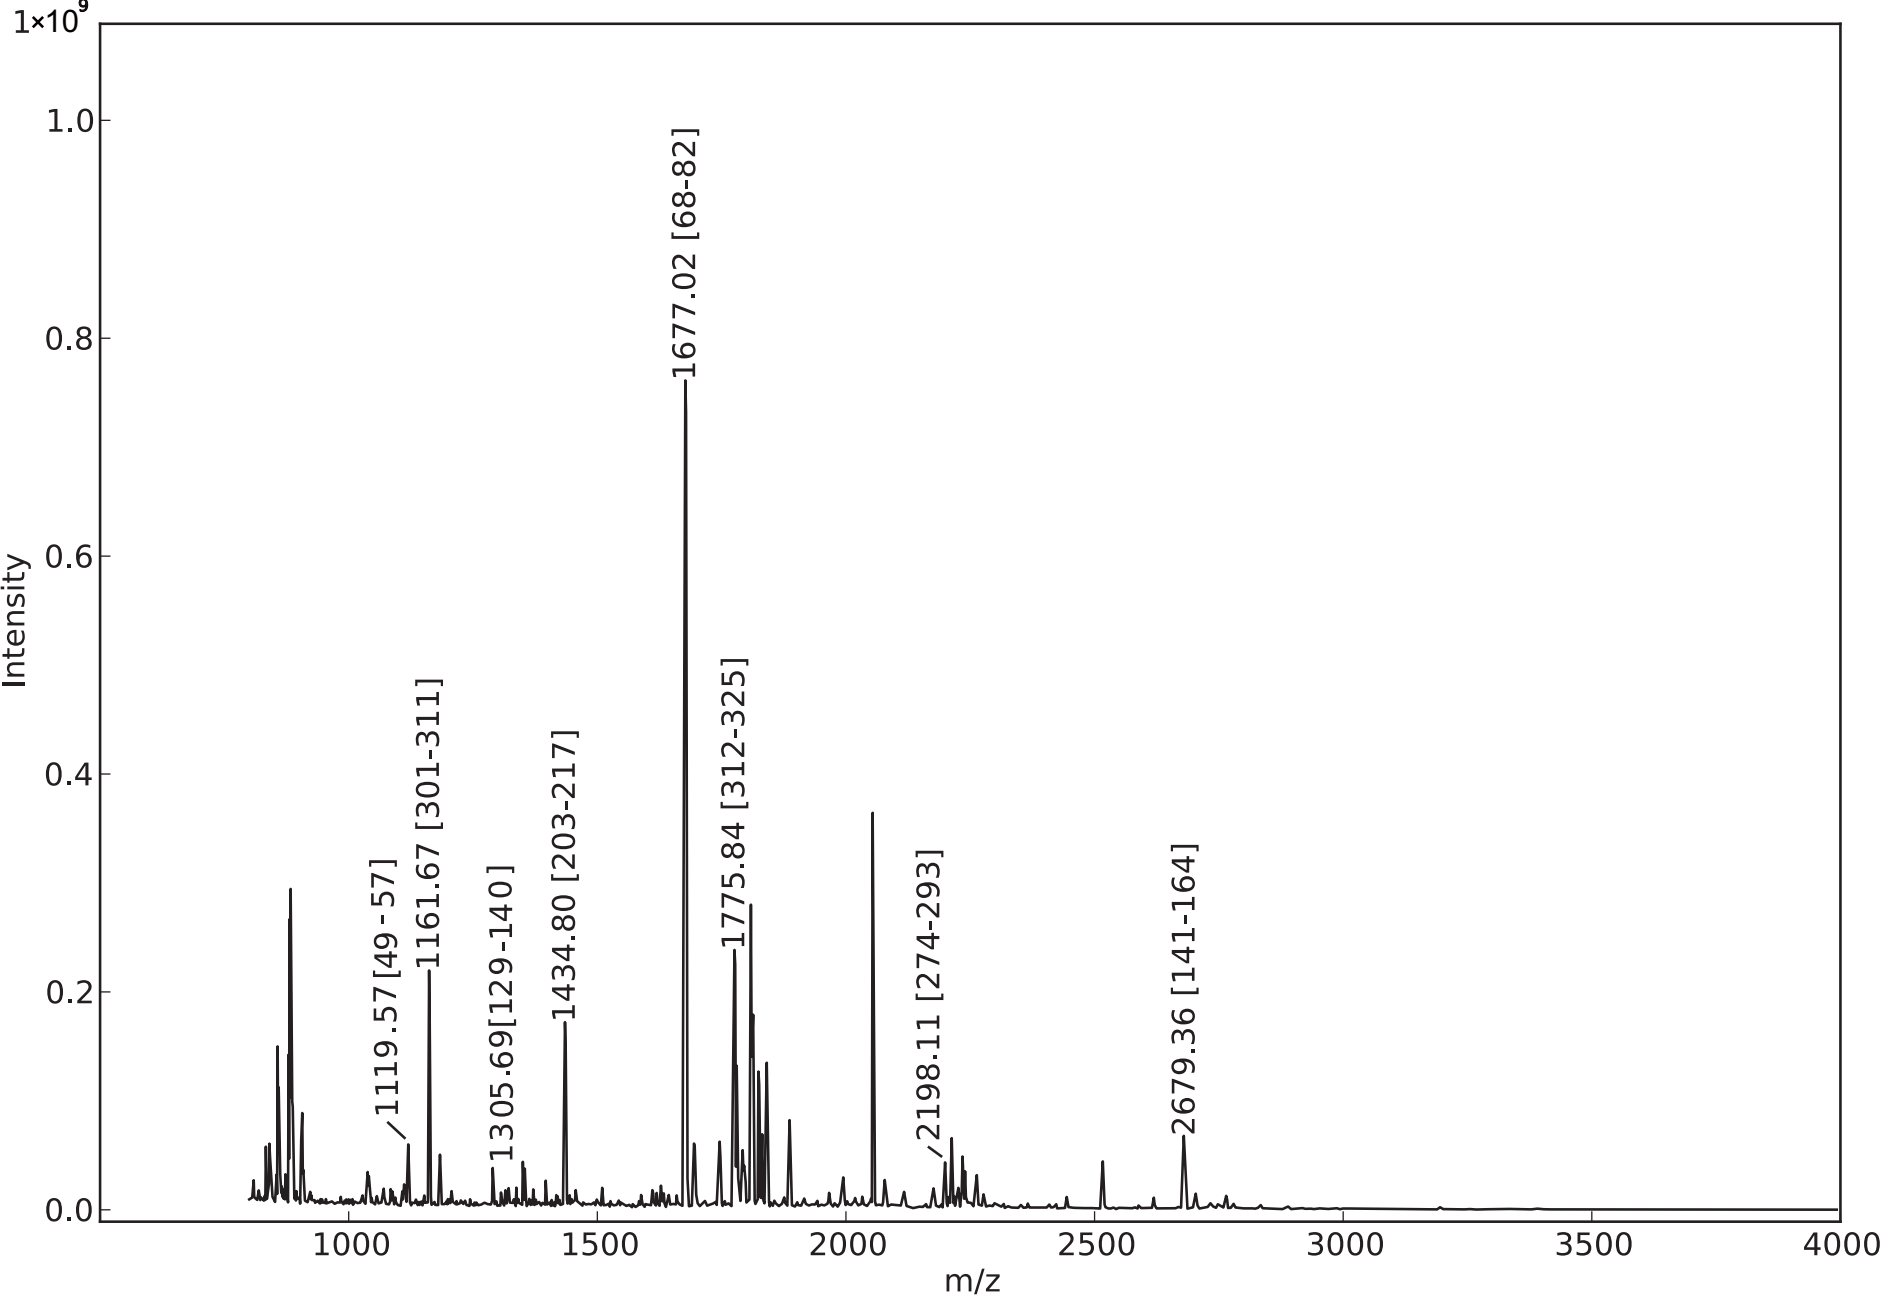

Spot No. 45

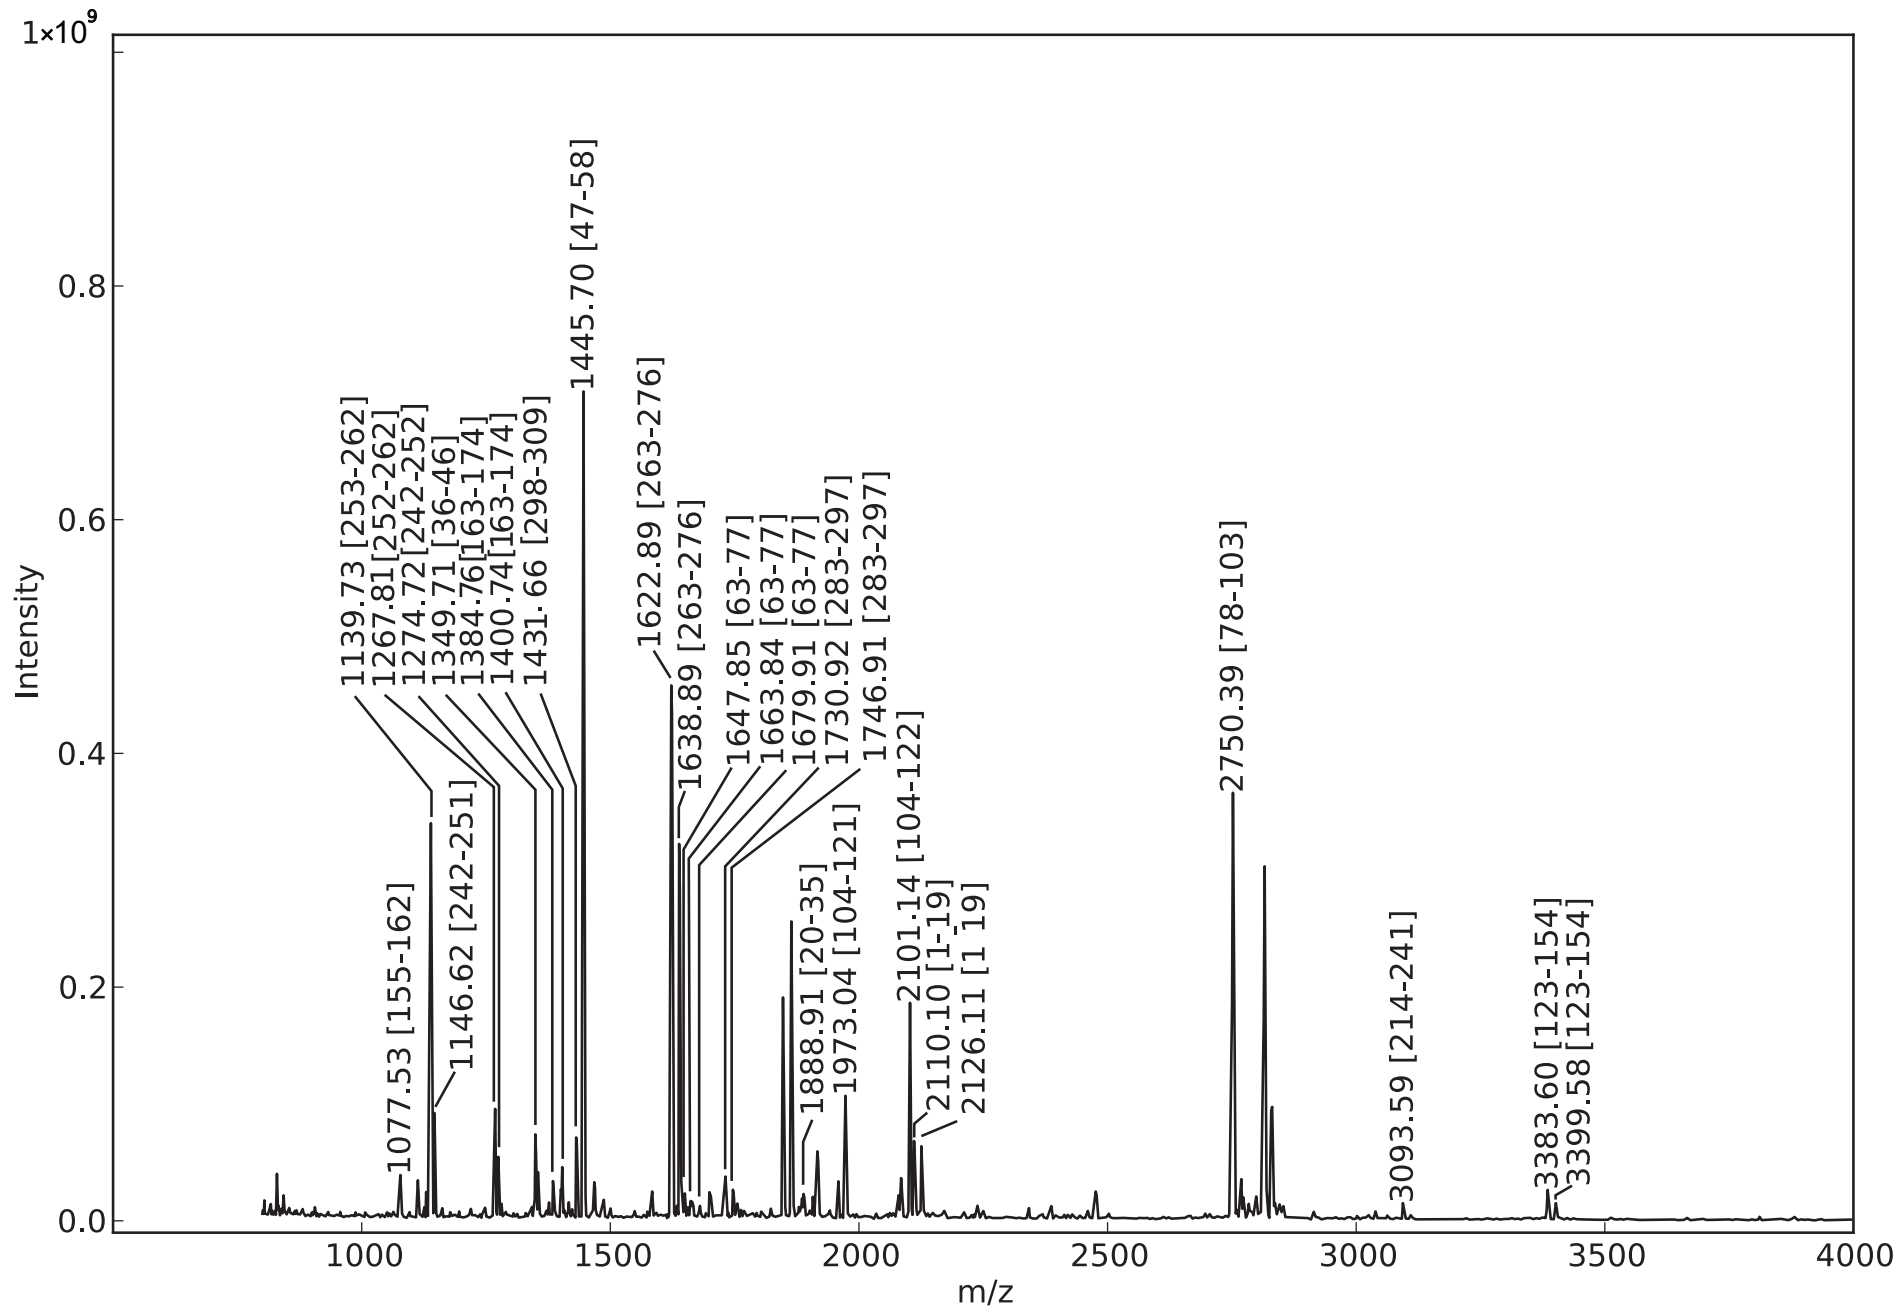

Spot No. 46

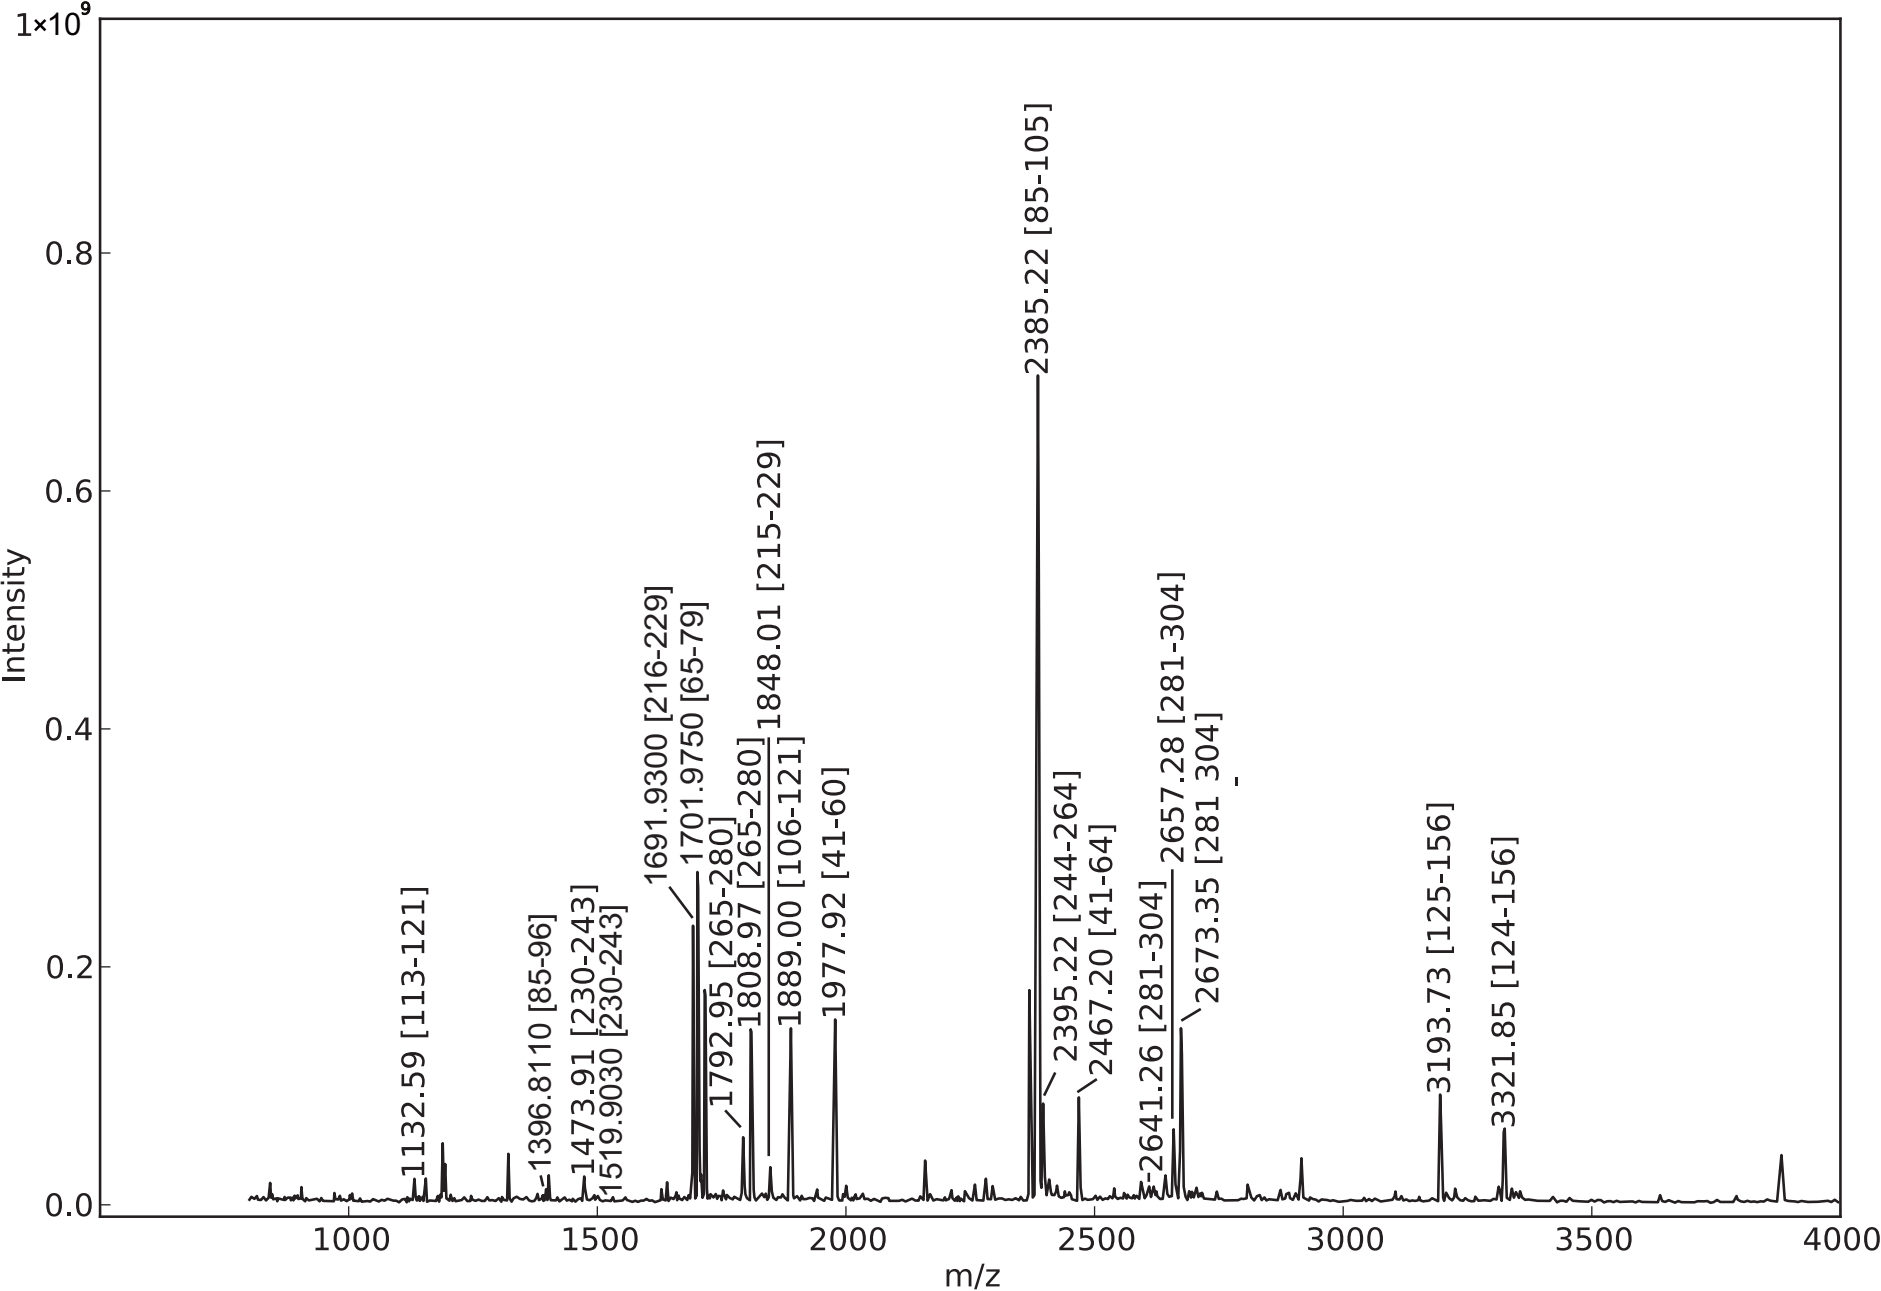



Spot No. 47

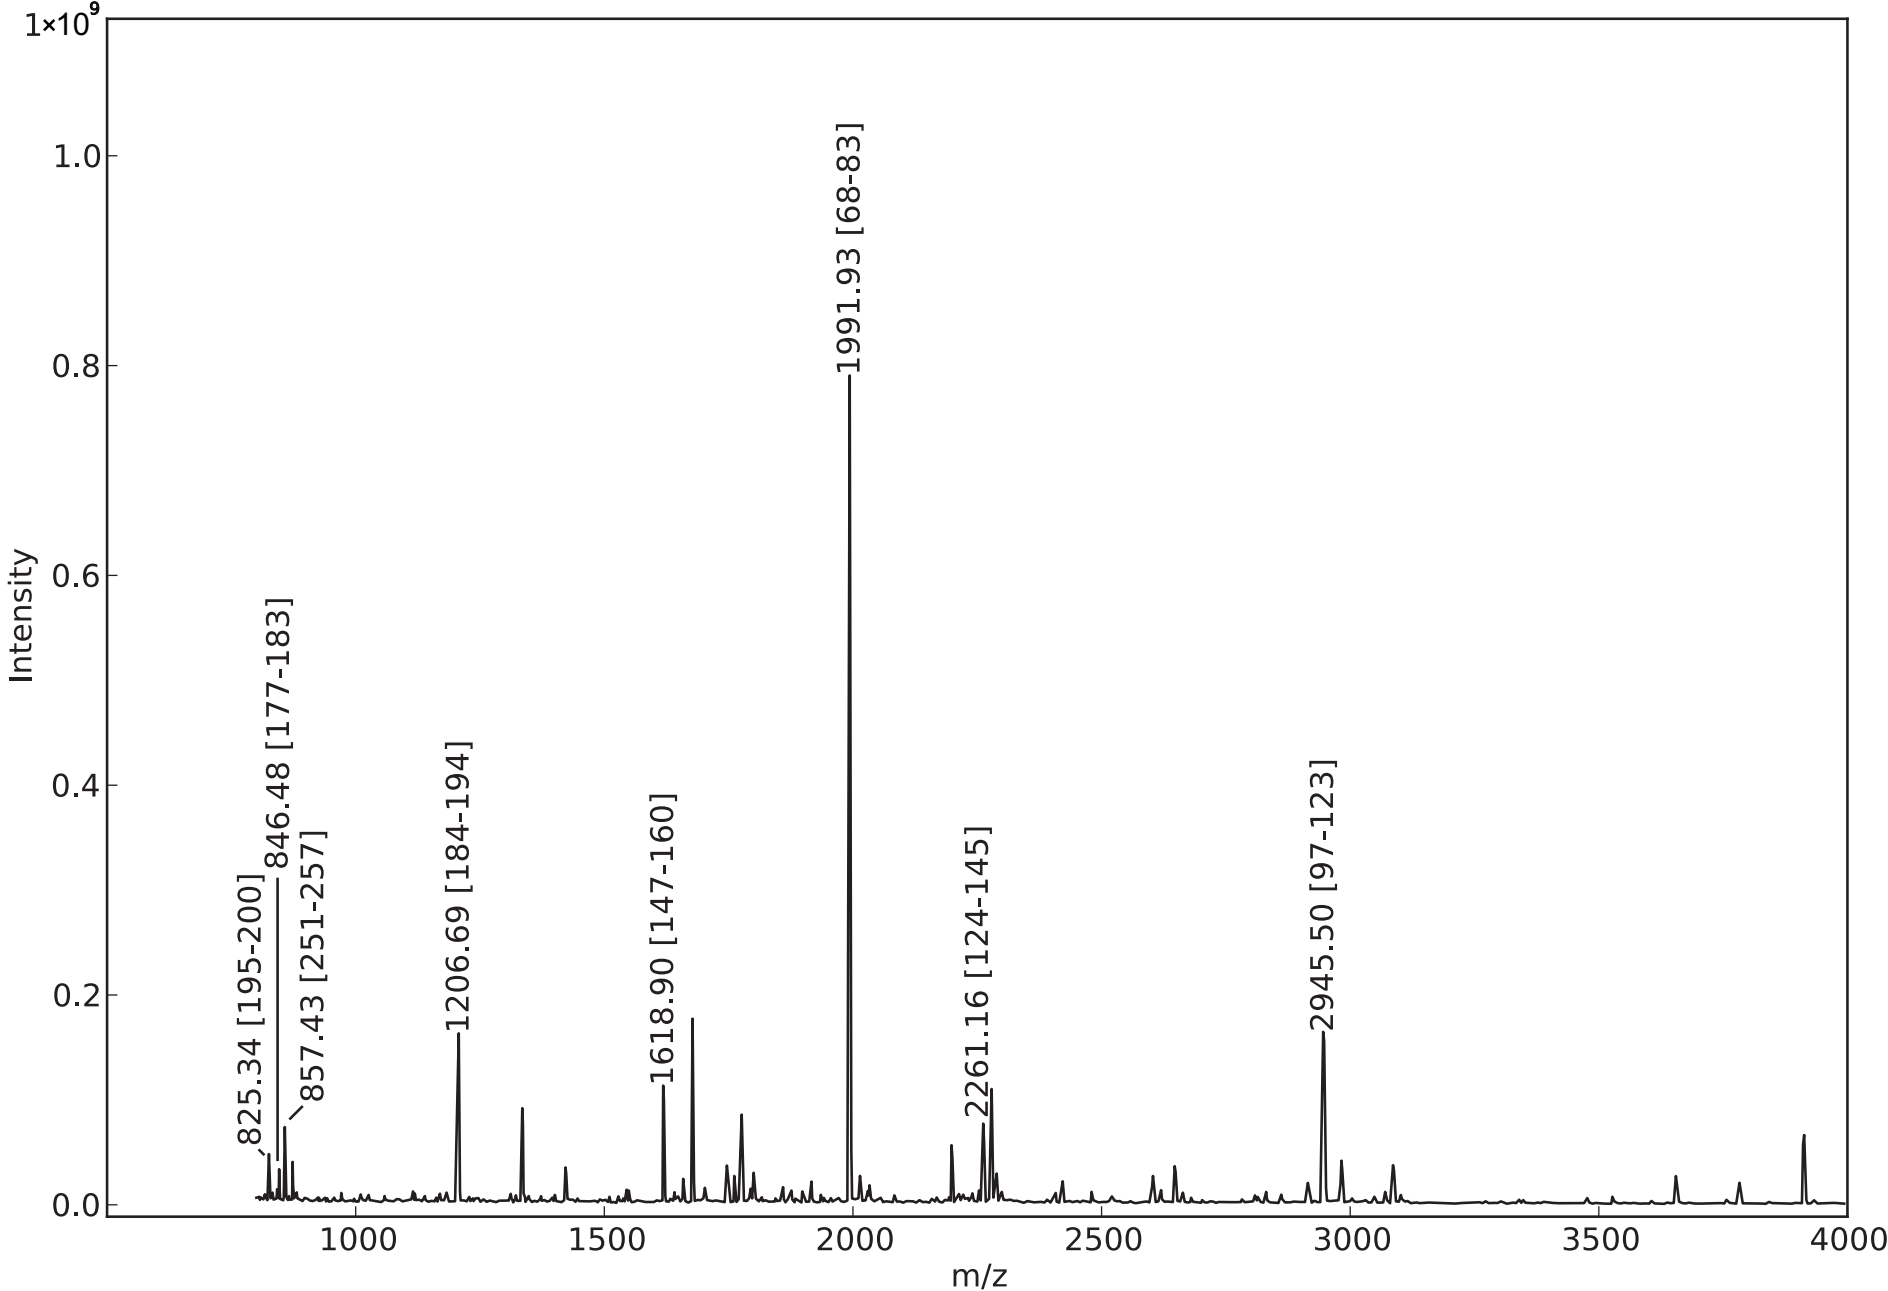

Spot No. 48

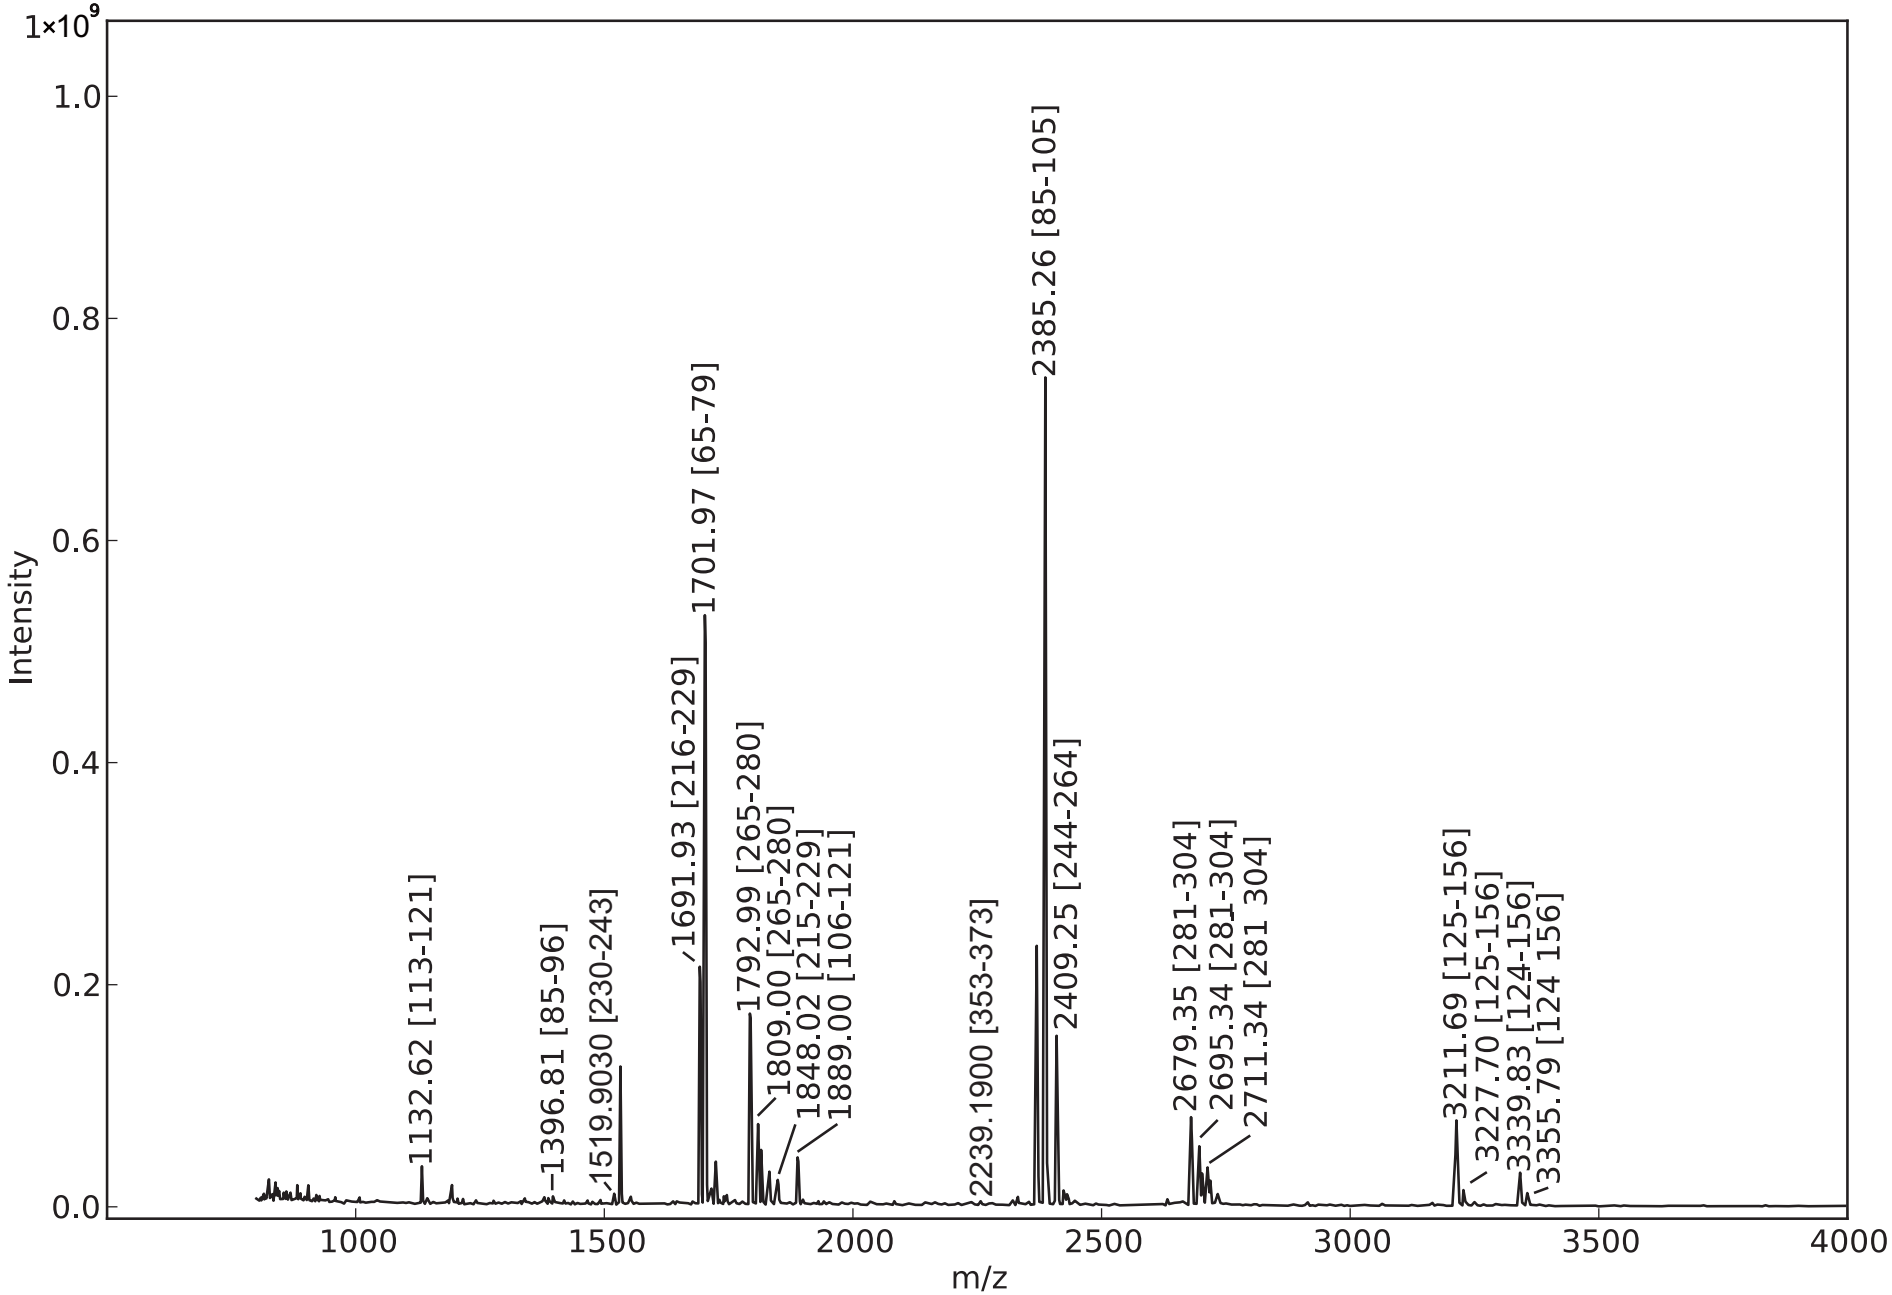

Spot No. 49

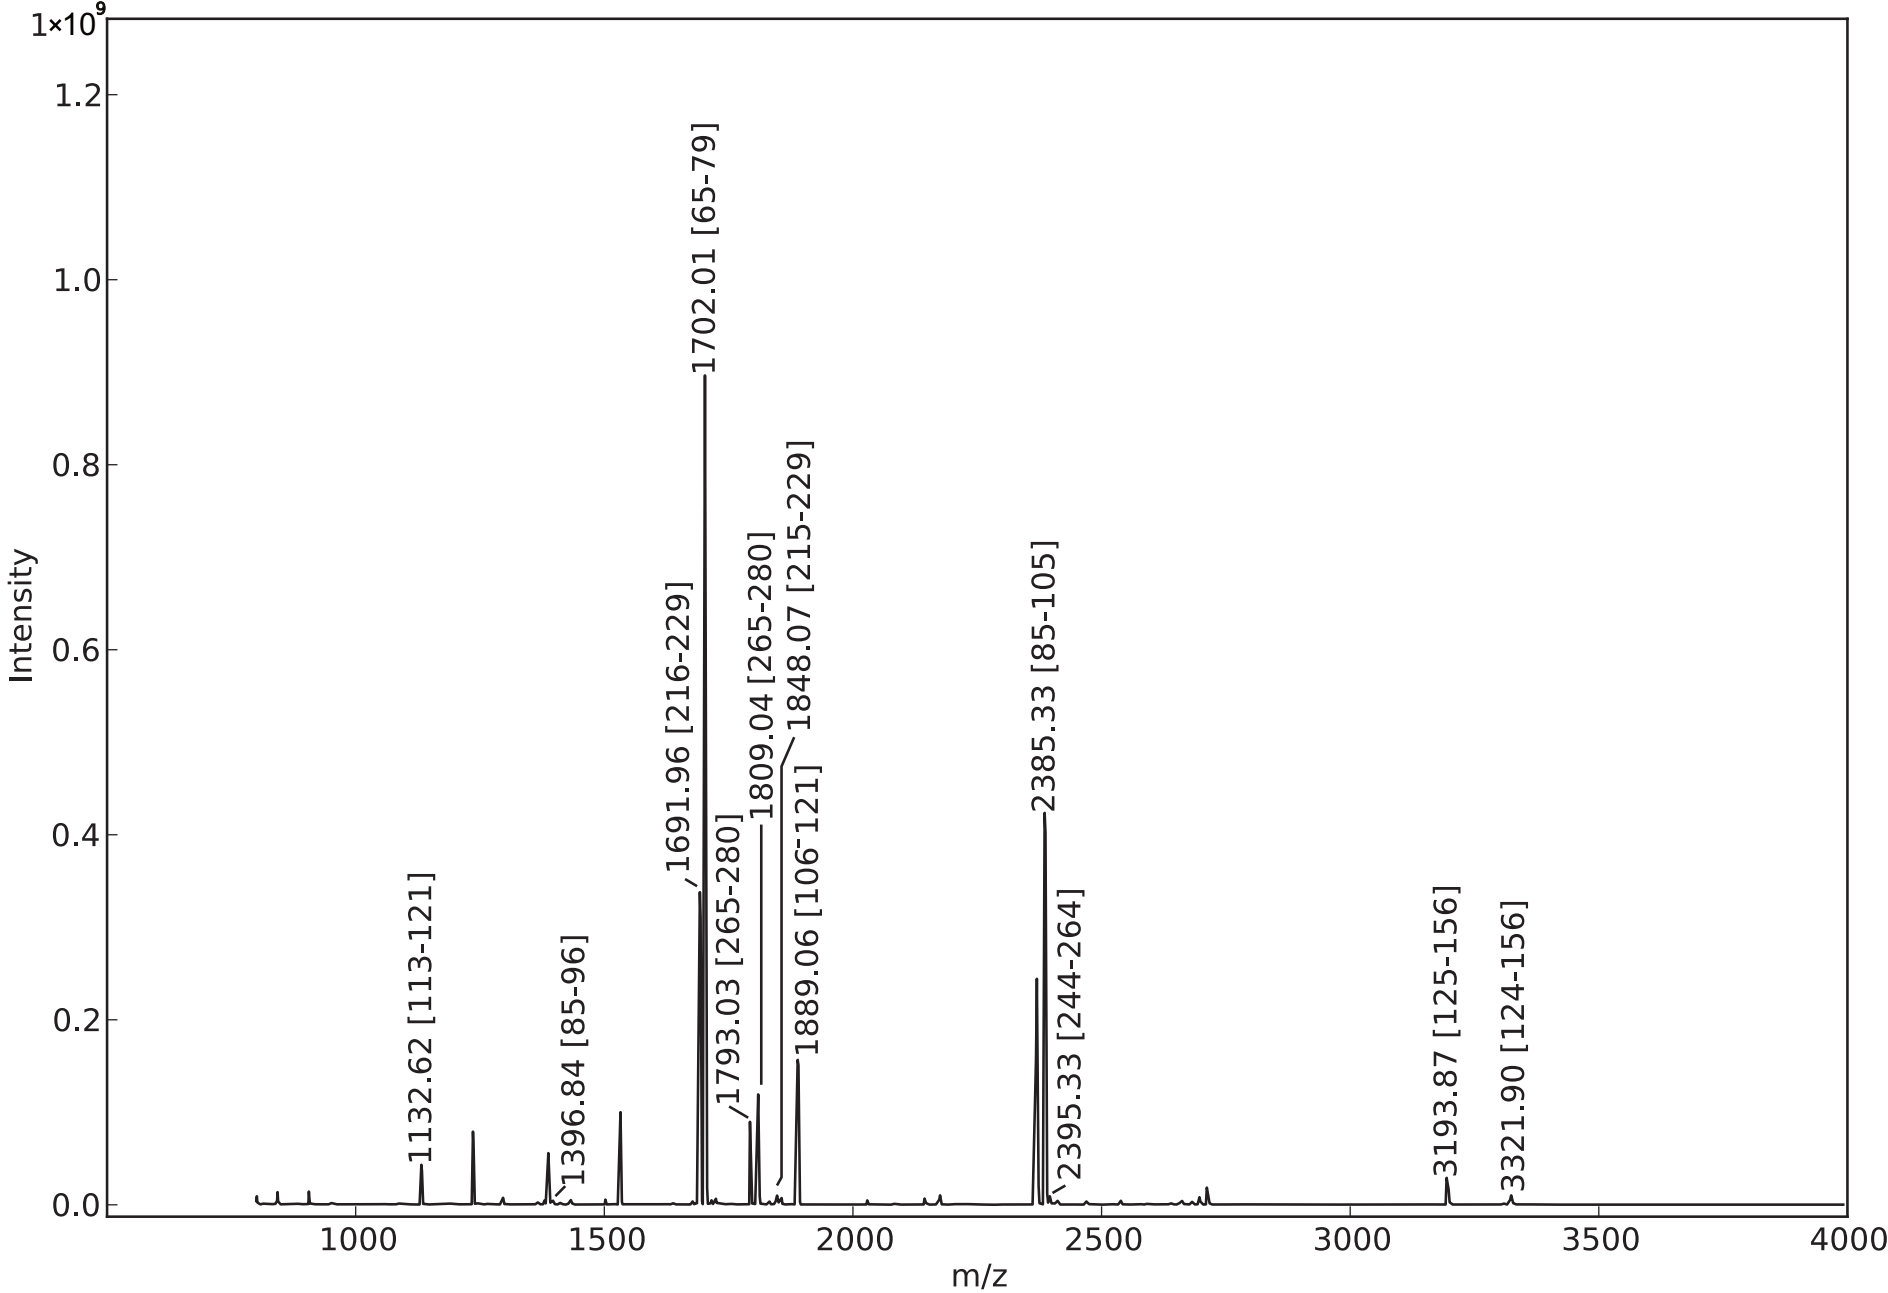

Spot No. 50

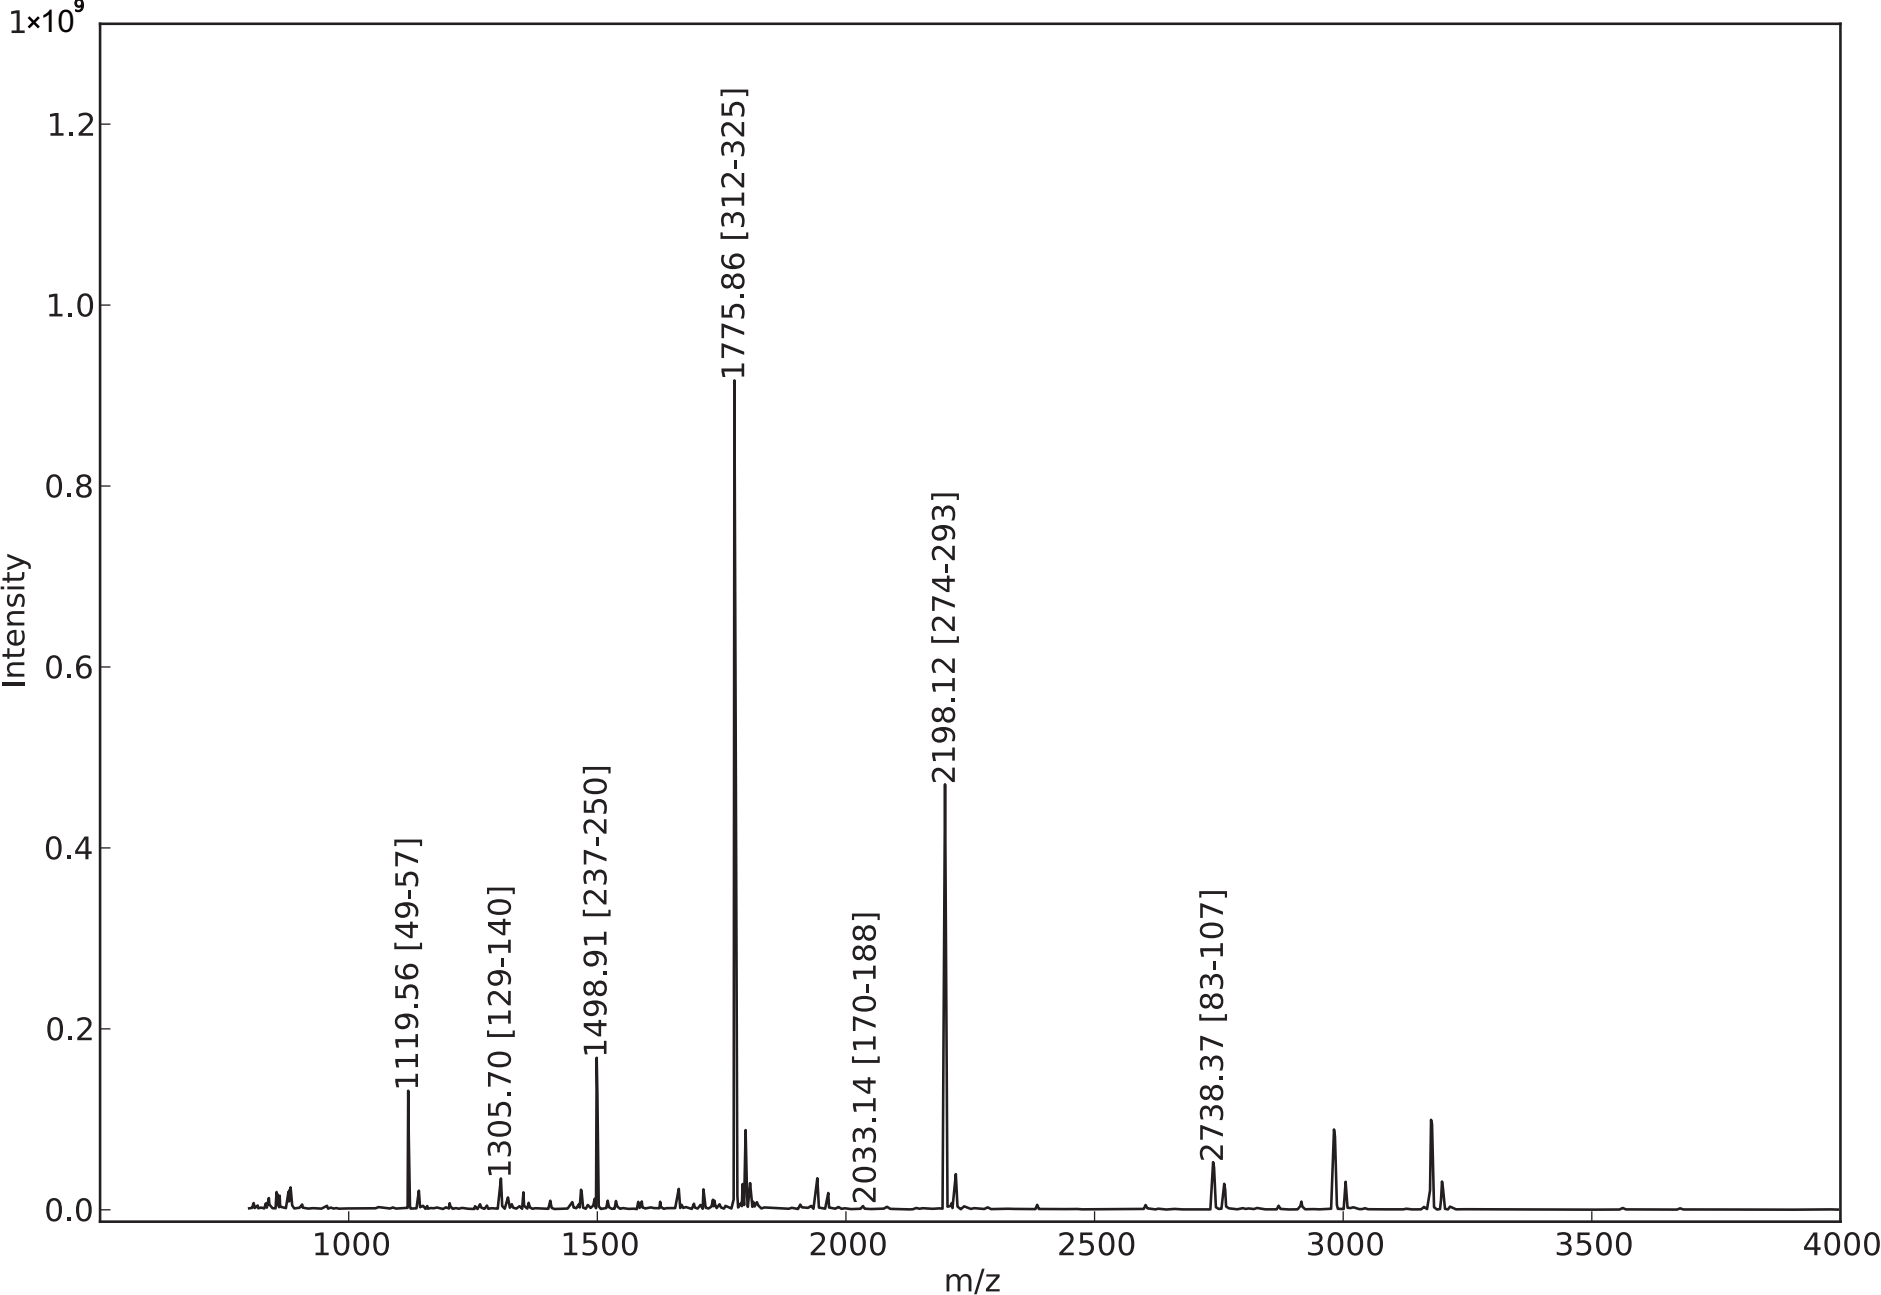

Spot No. 51

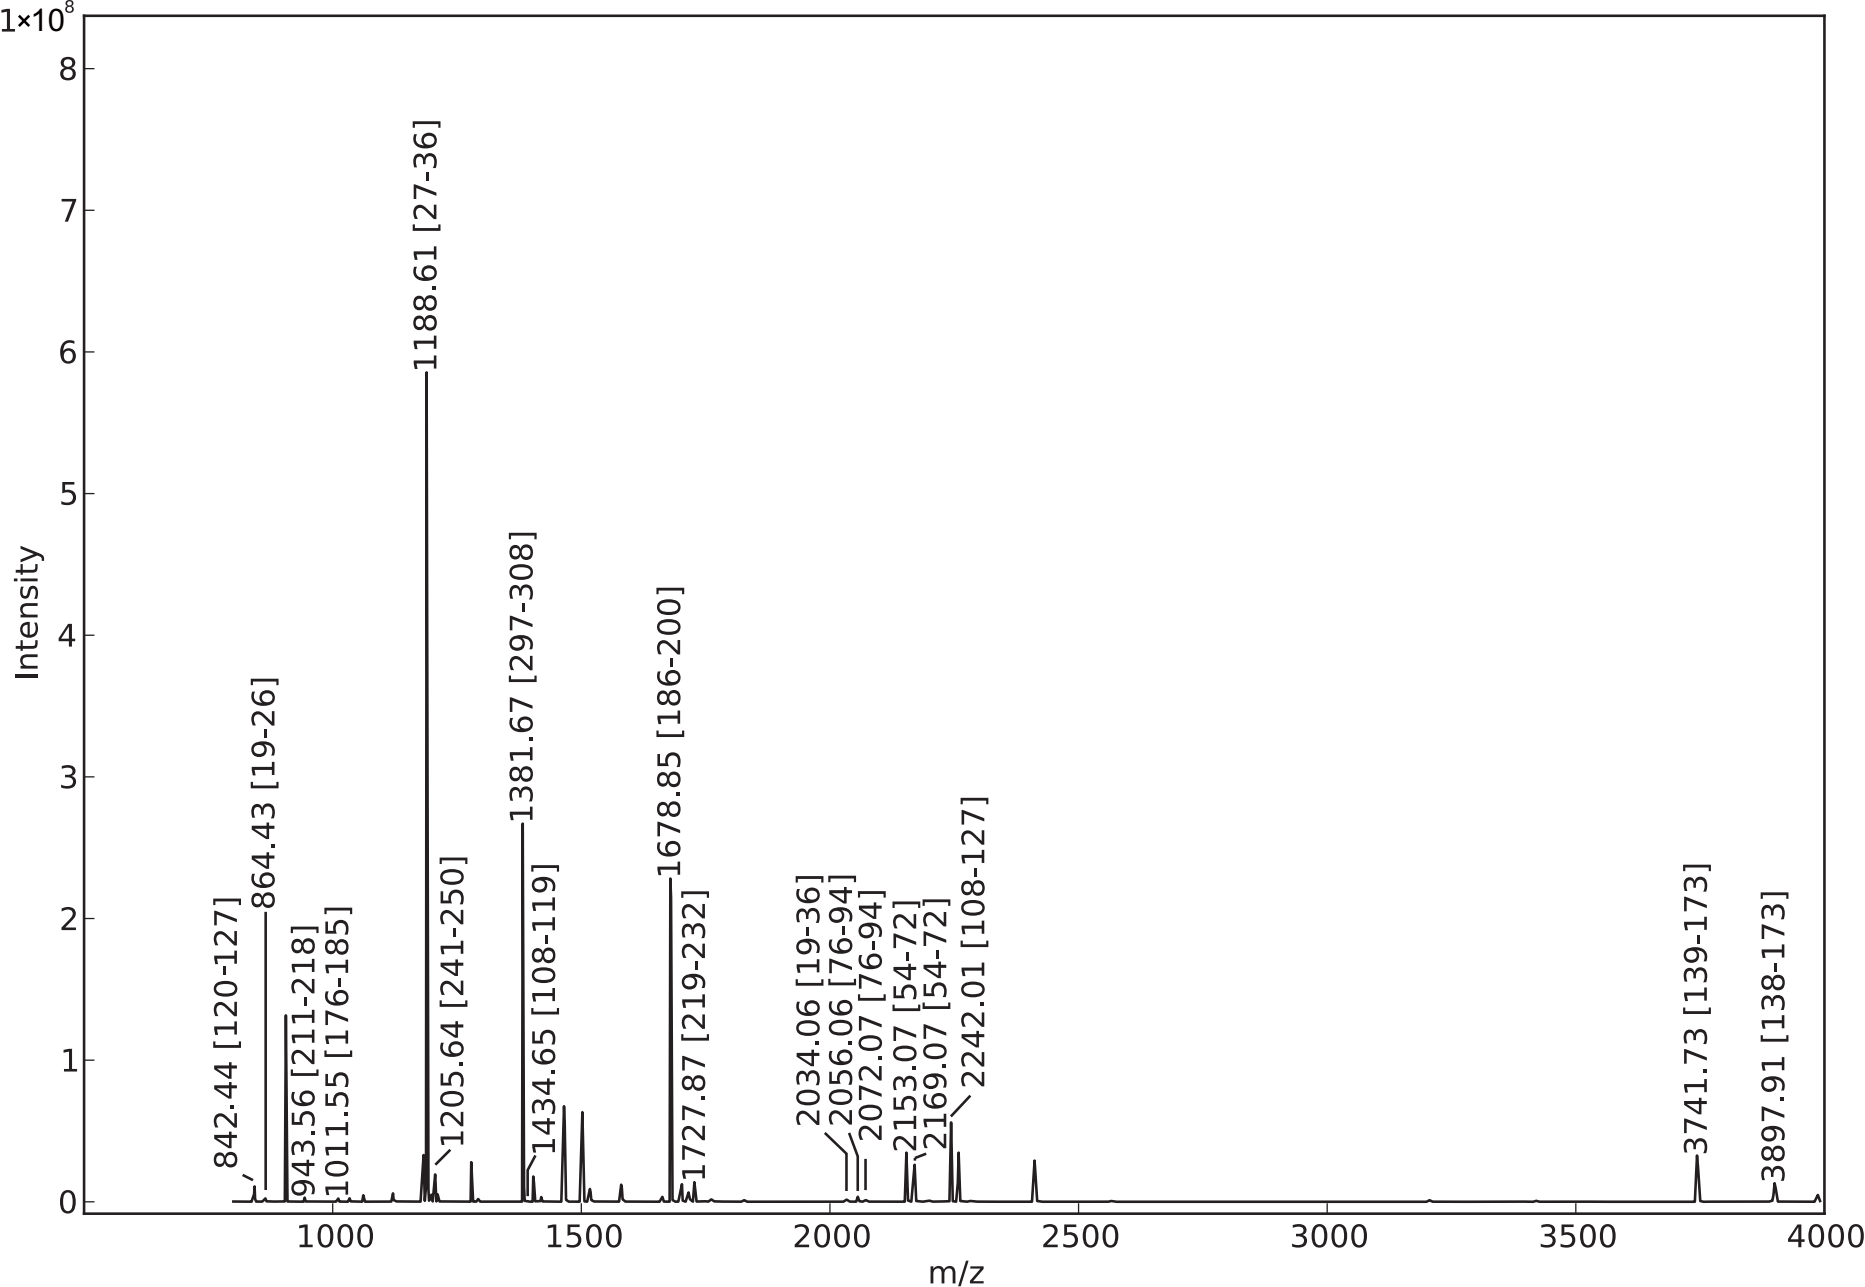

Spot No. 52

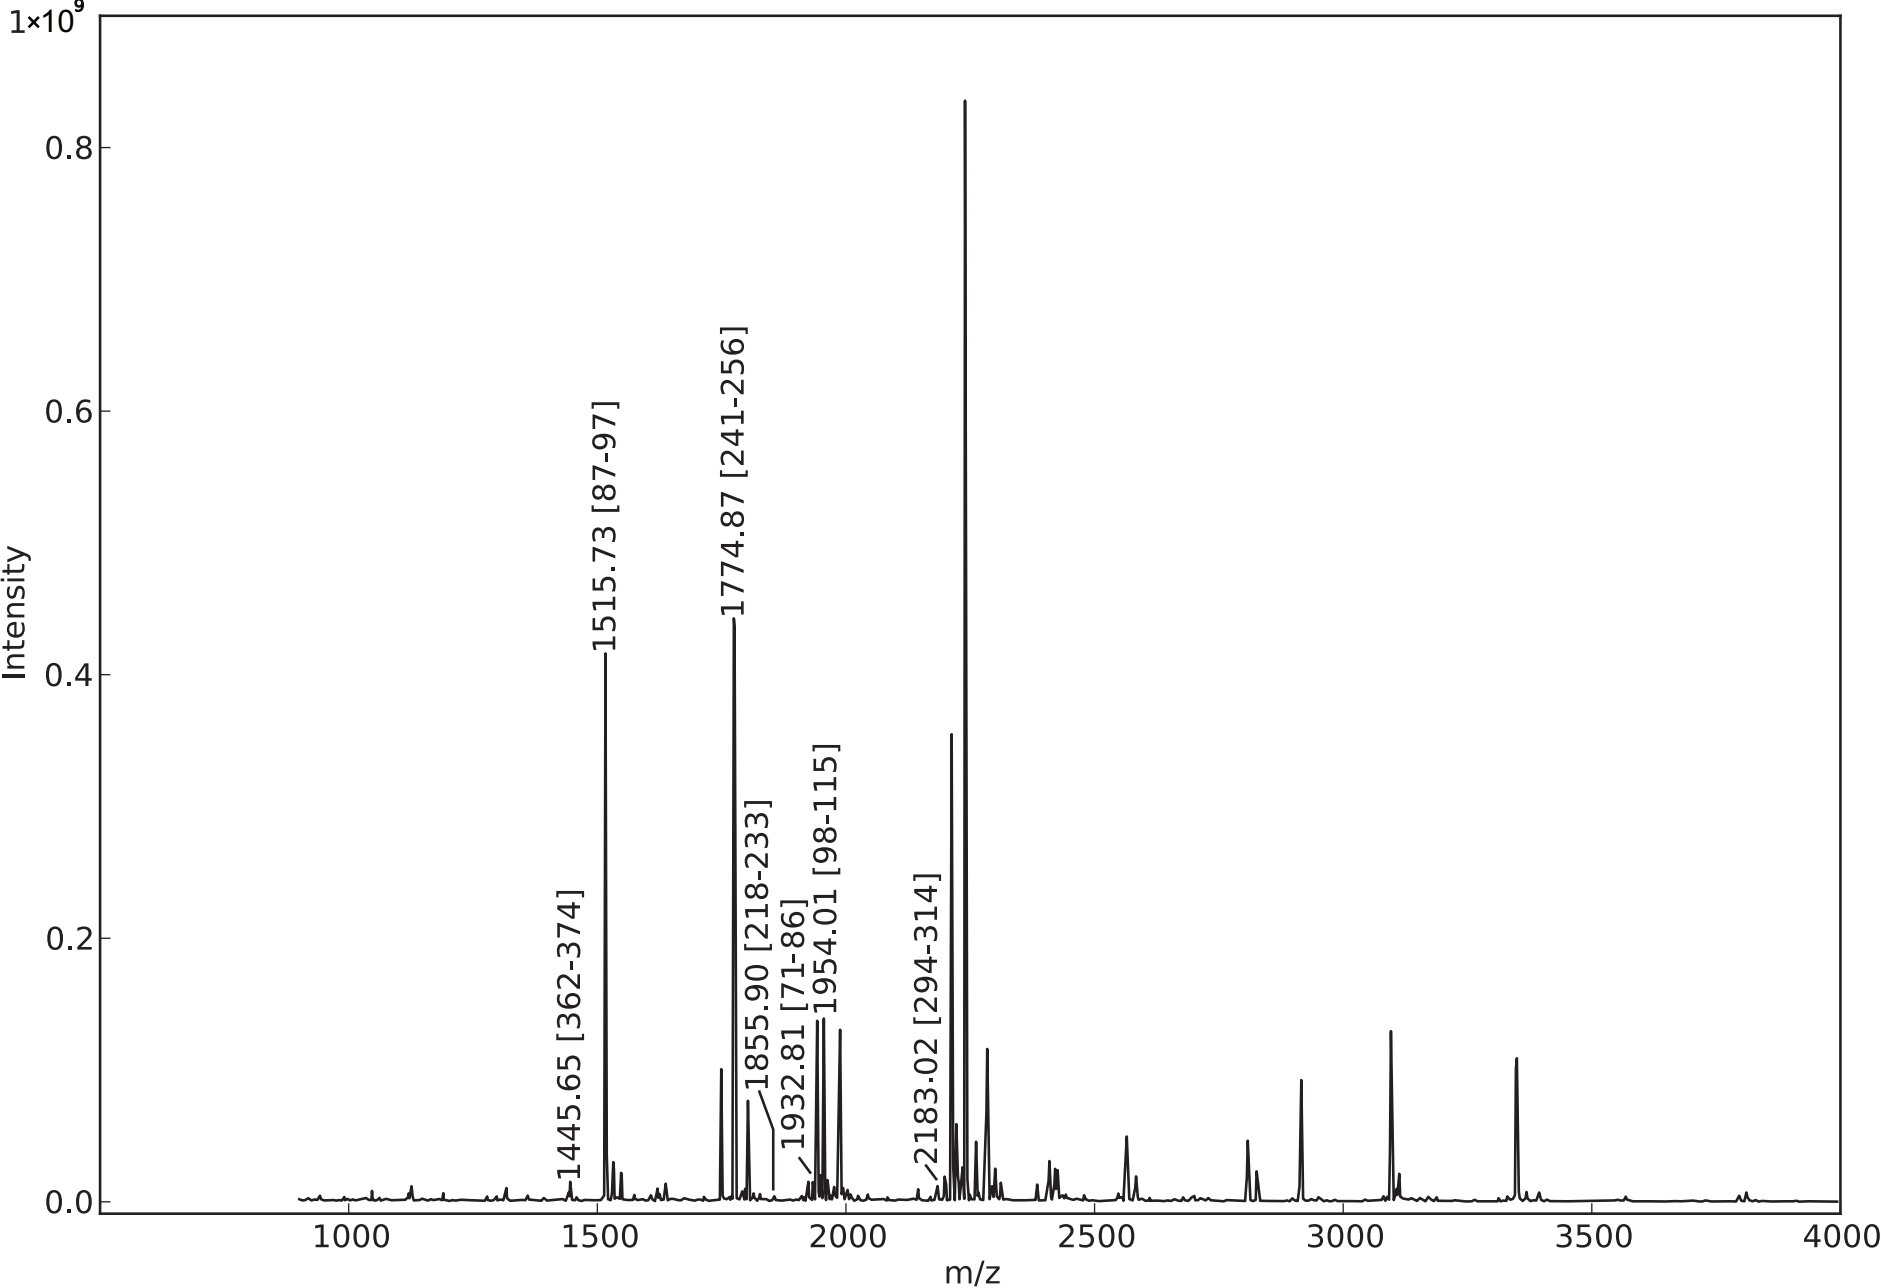

Spot No. 53

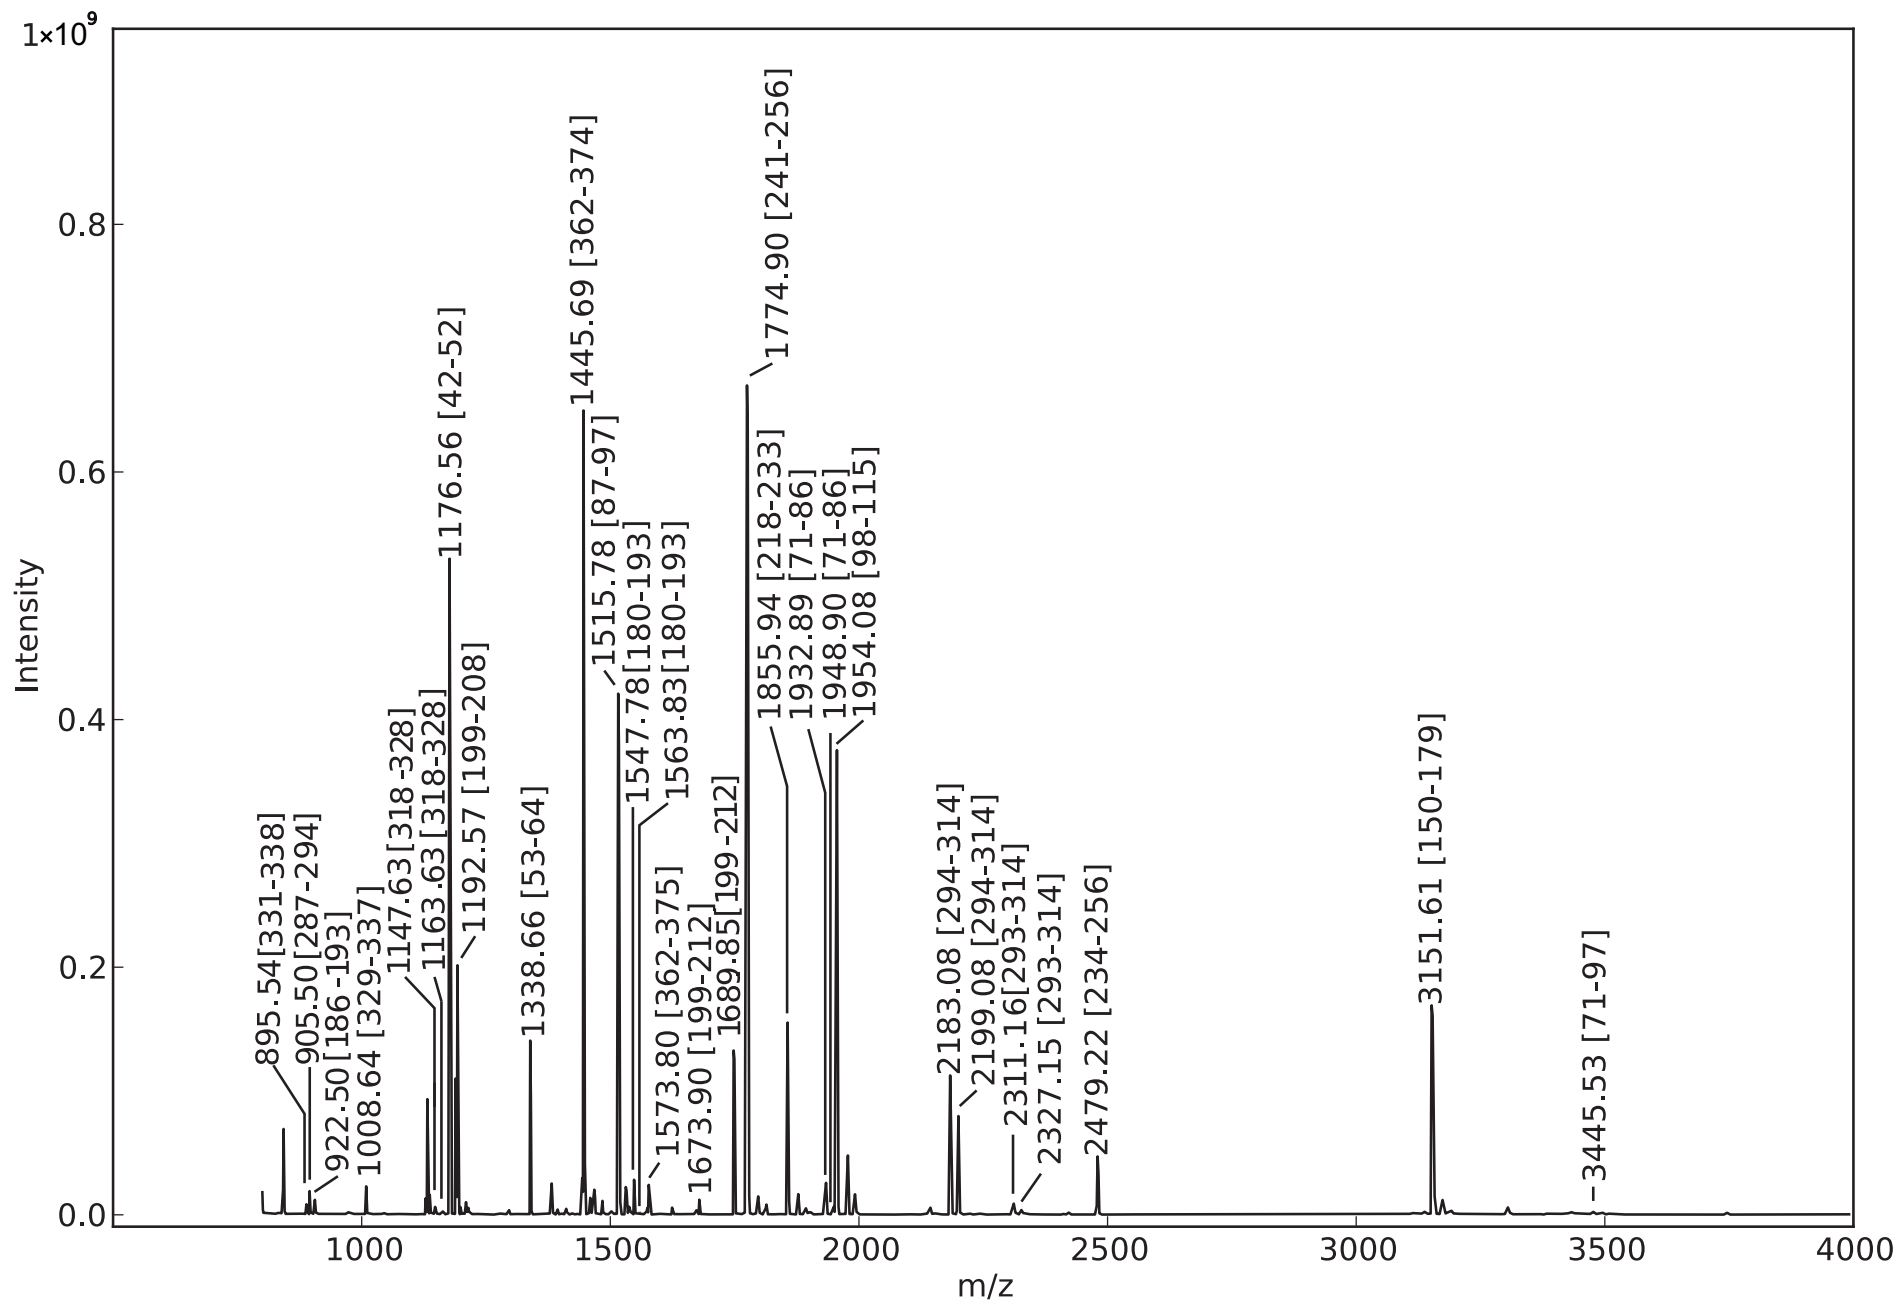

Spot No. 54

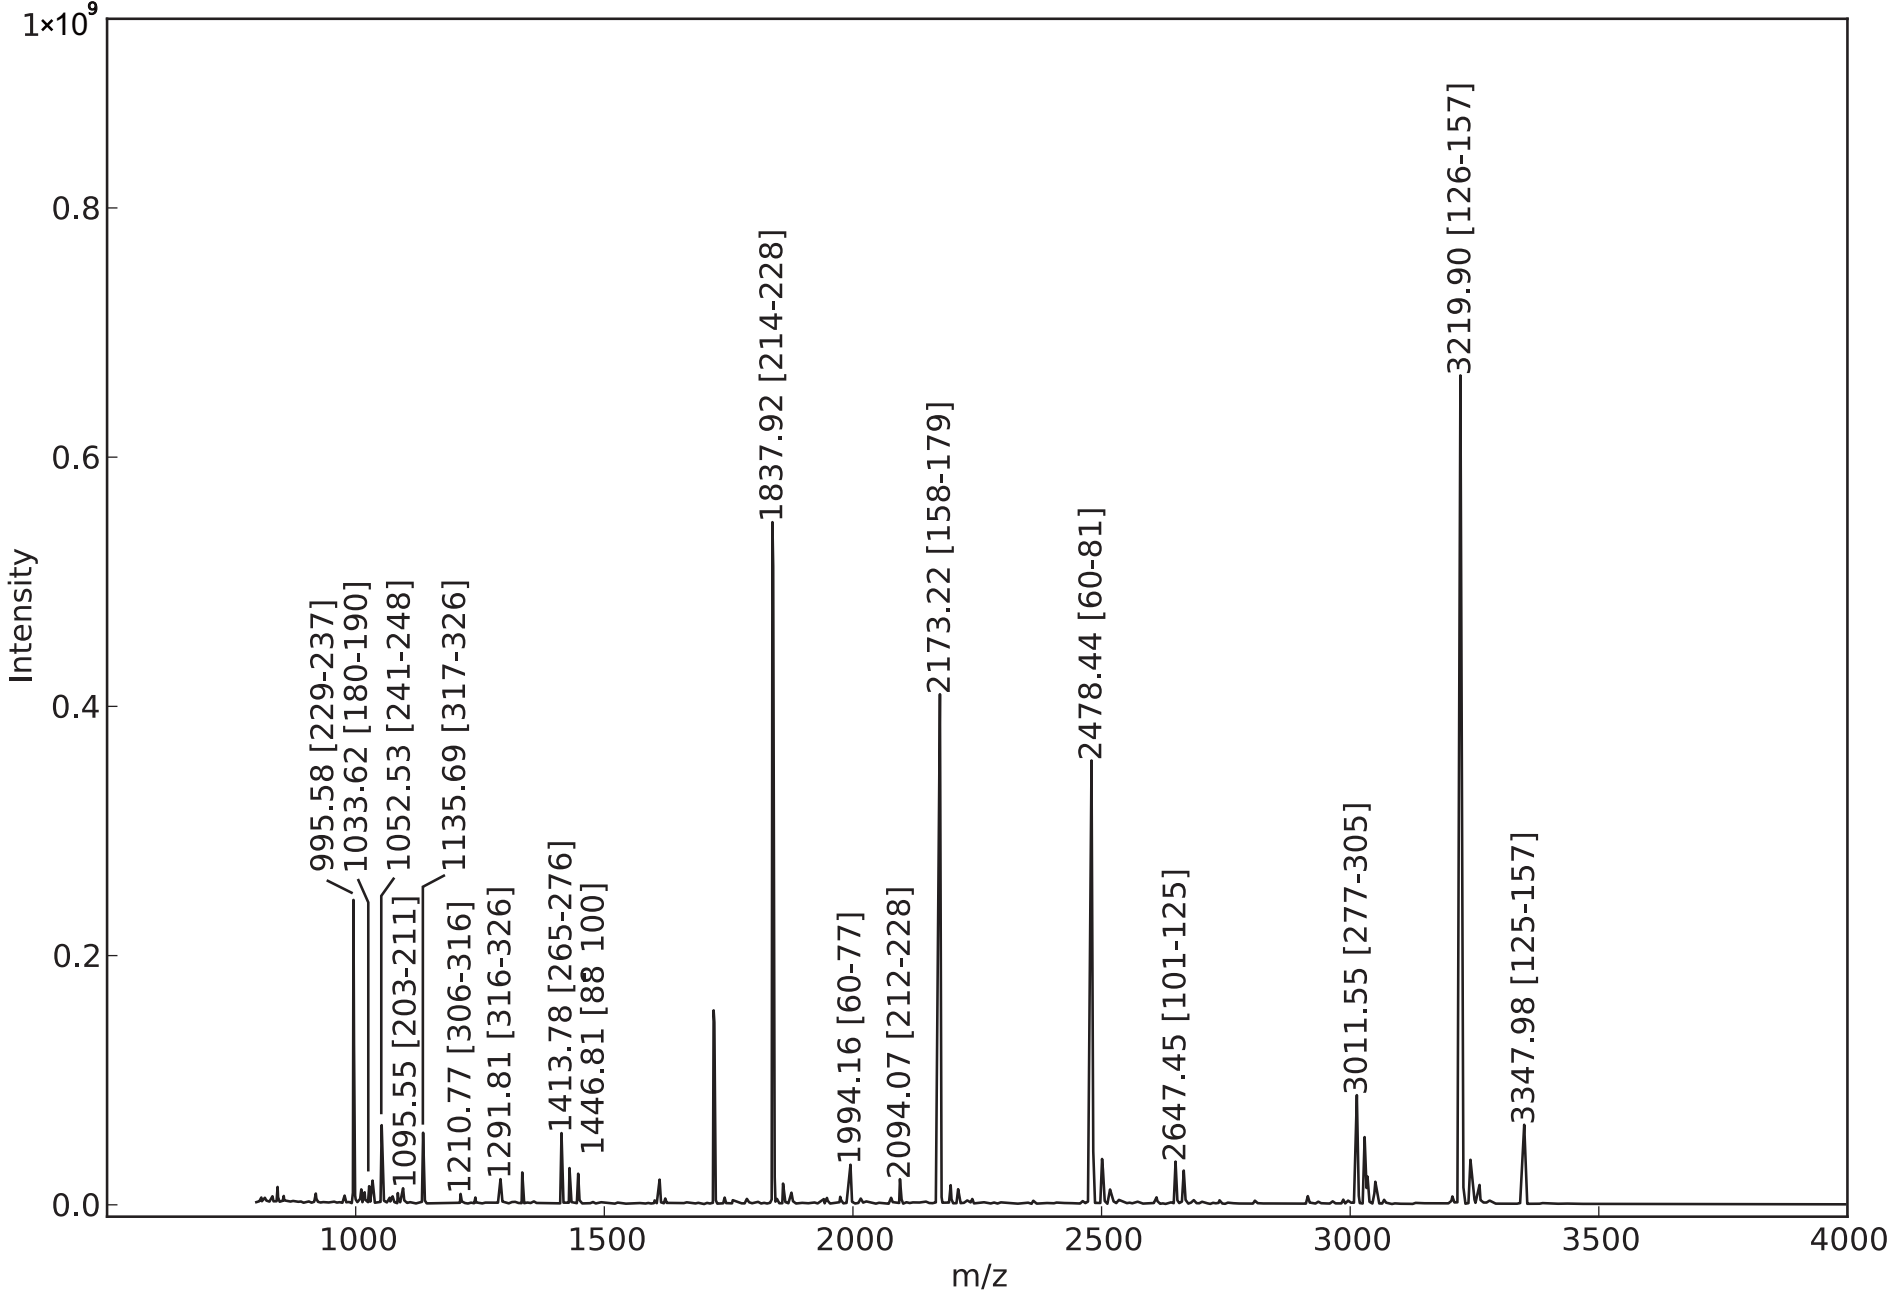



Spot No. 55

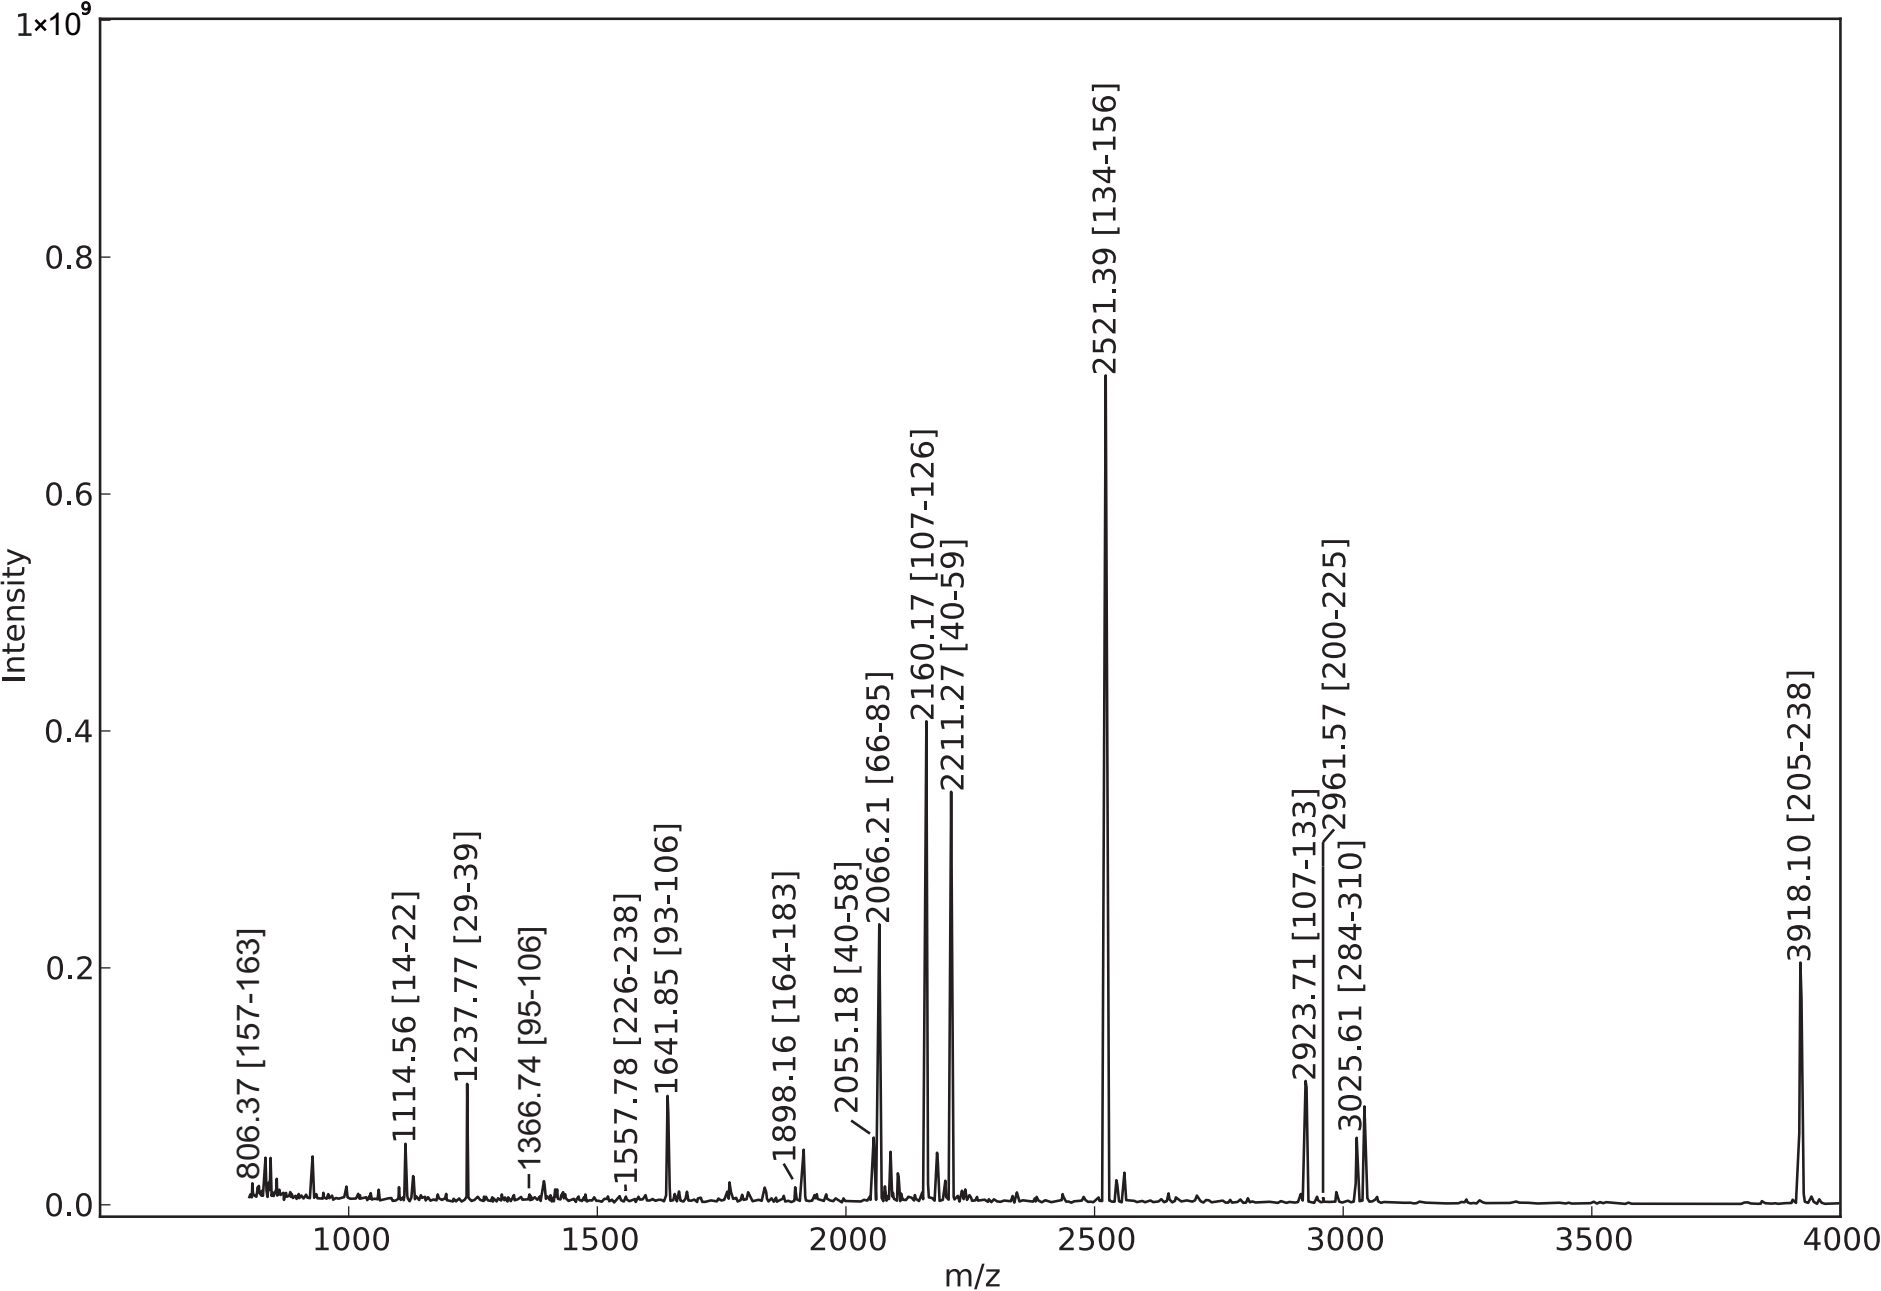

Spot No. 56

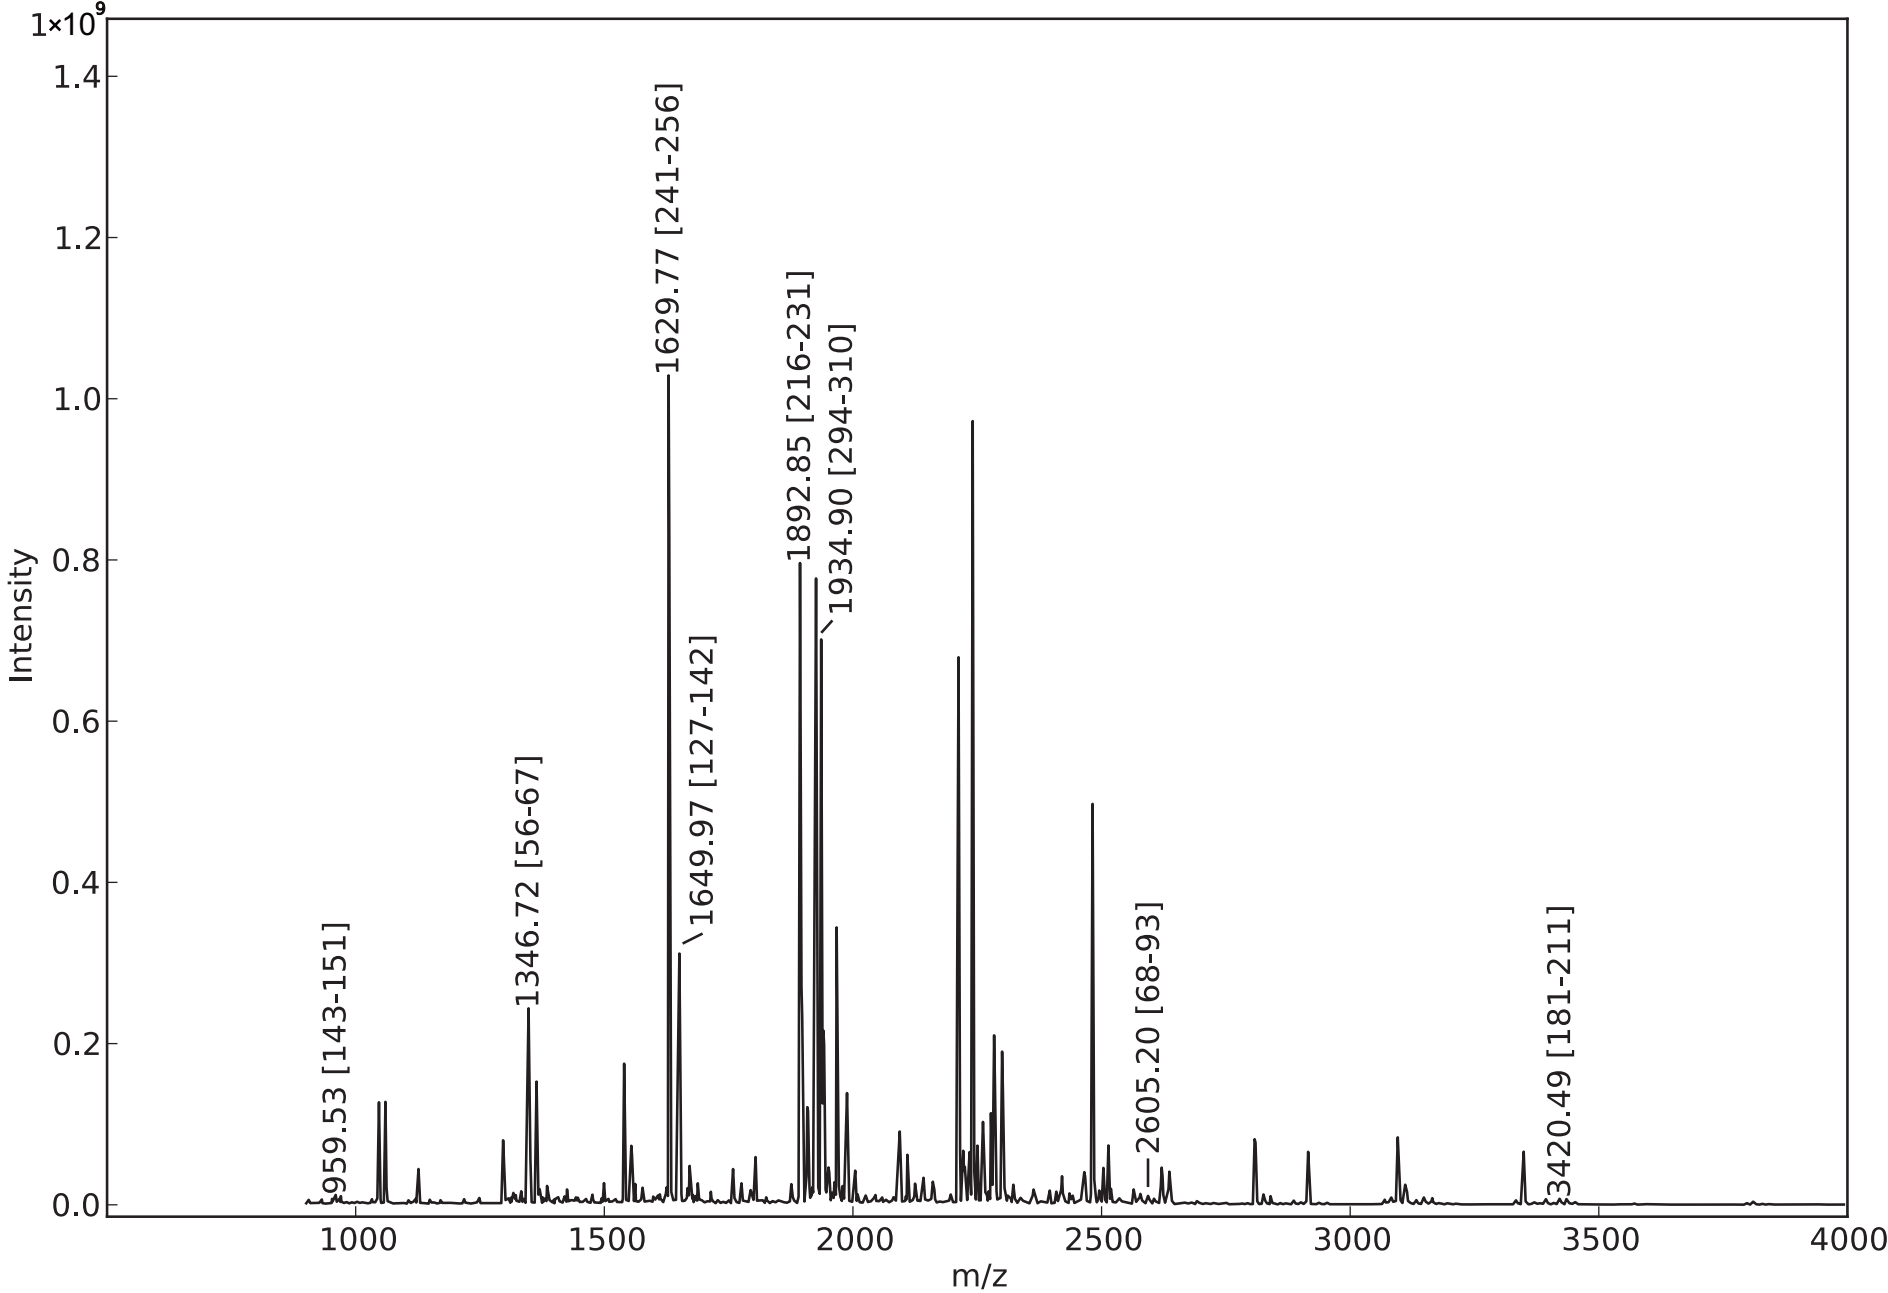

Spot No. 57

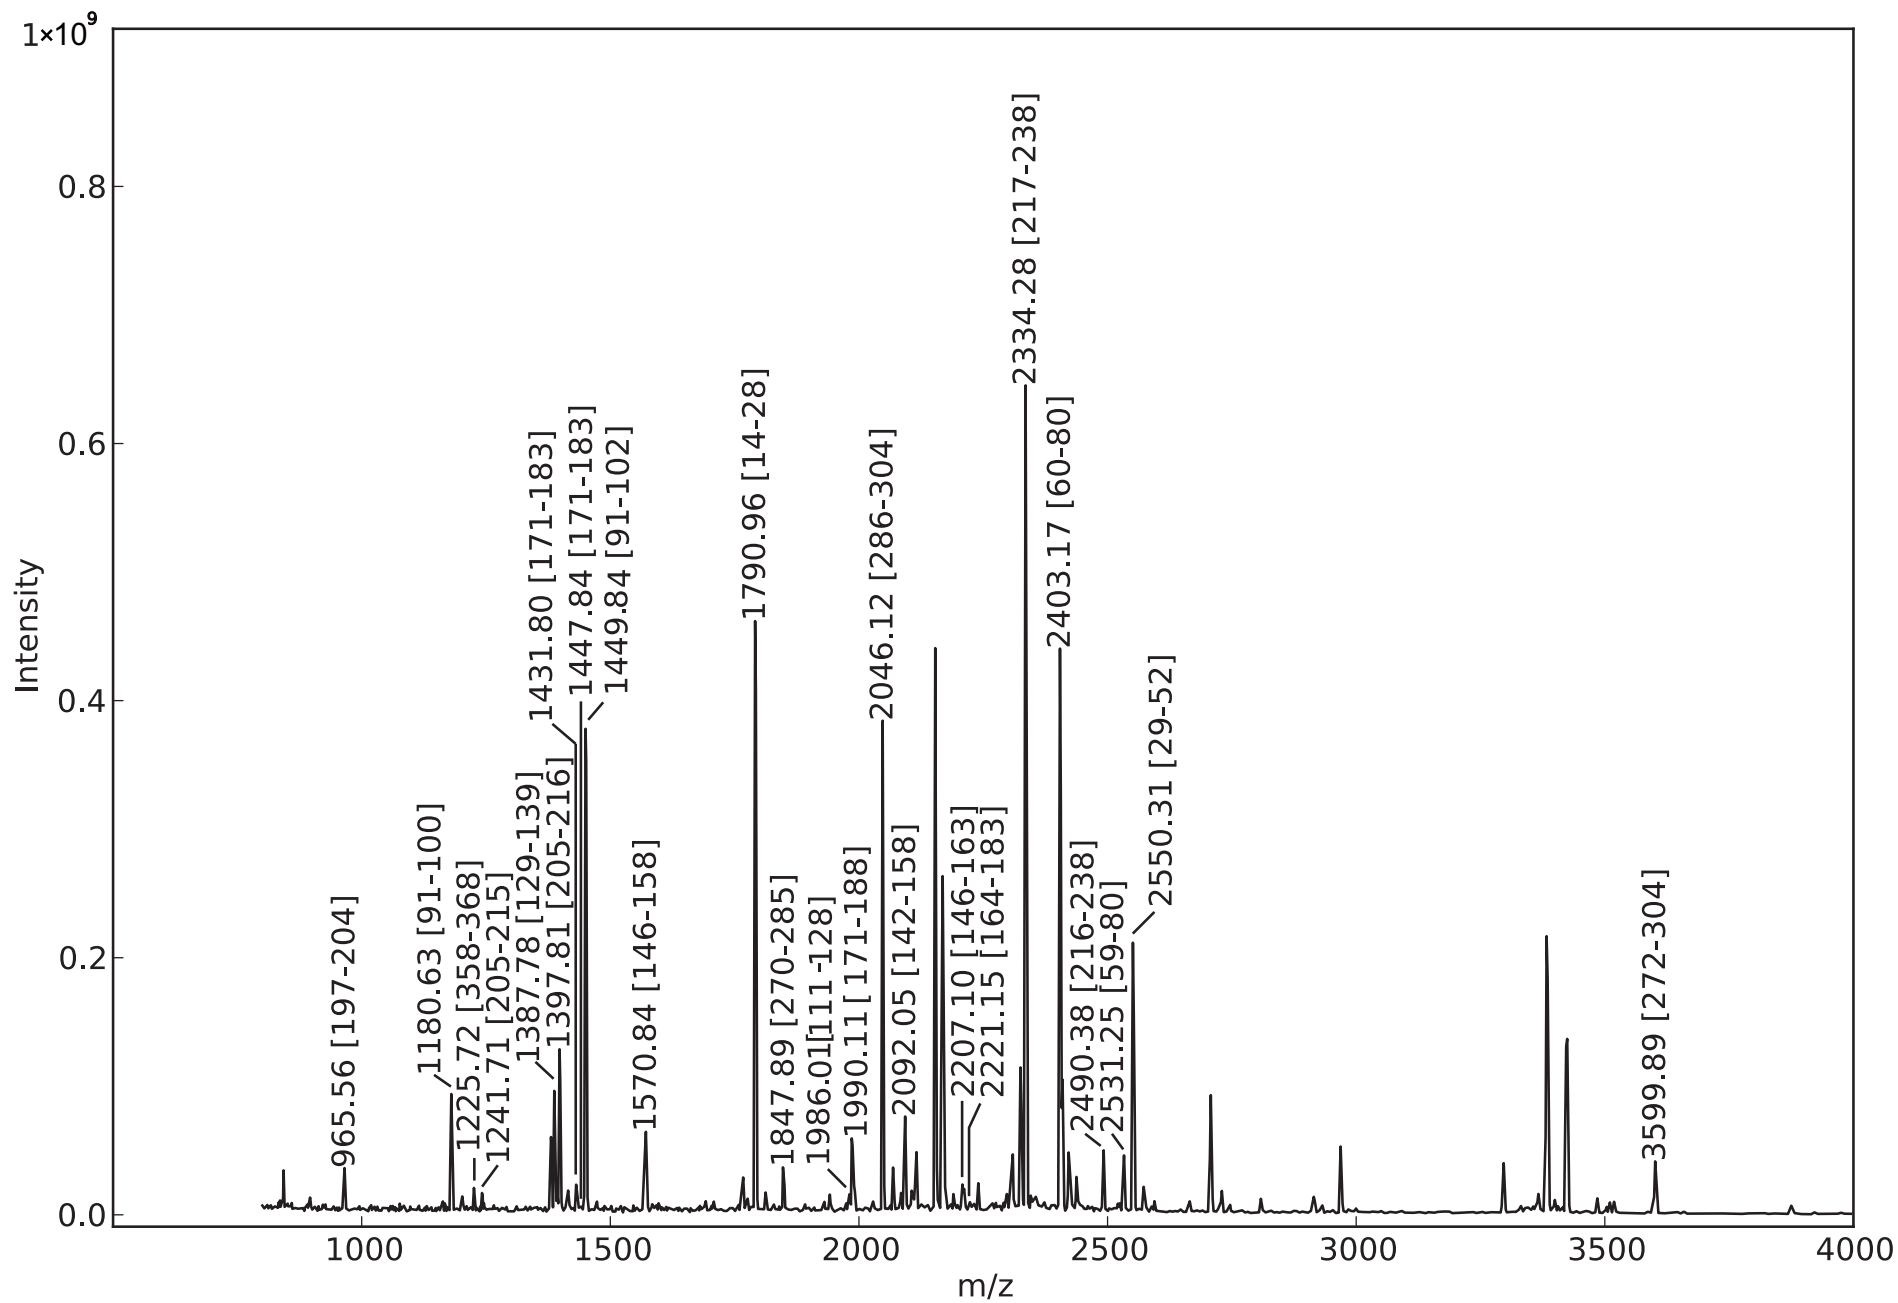

Spot No. 58

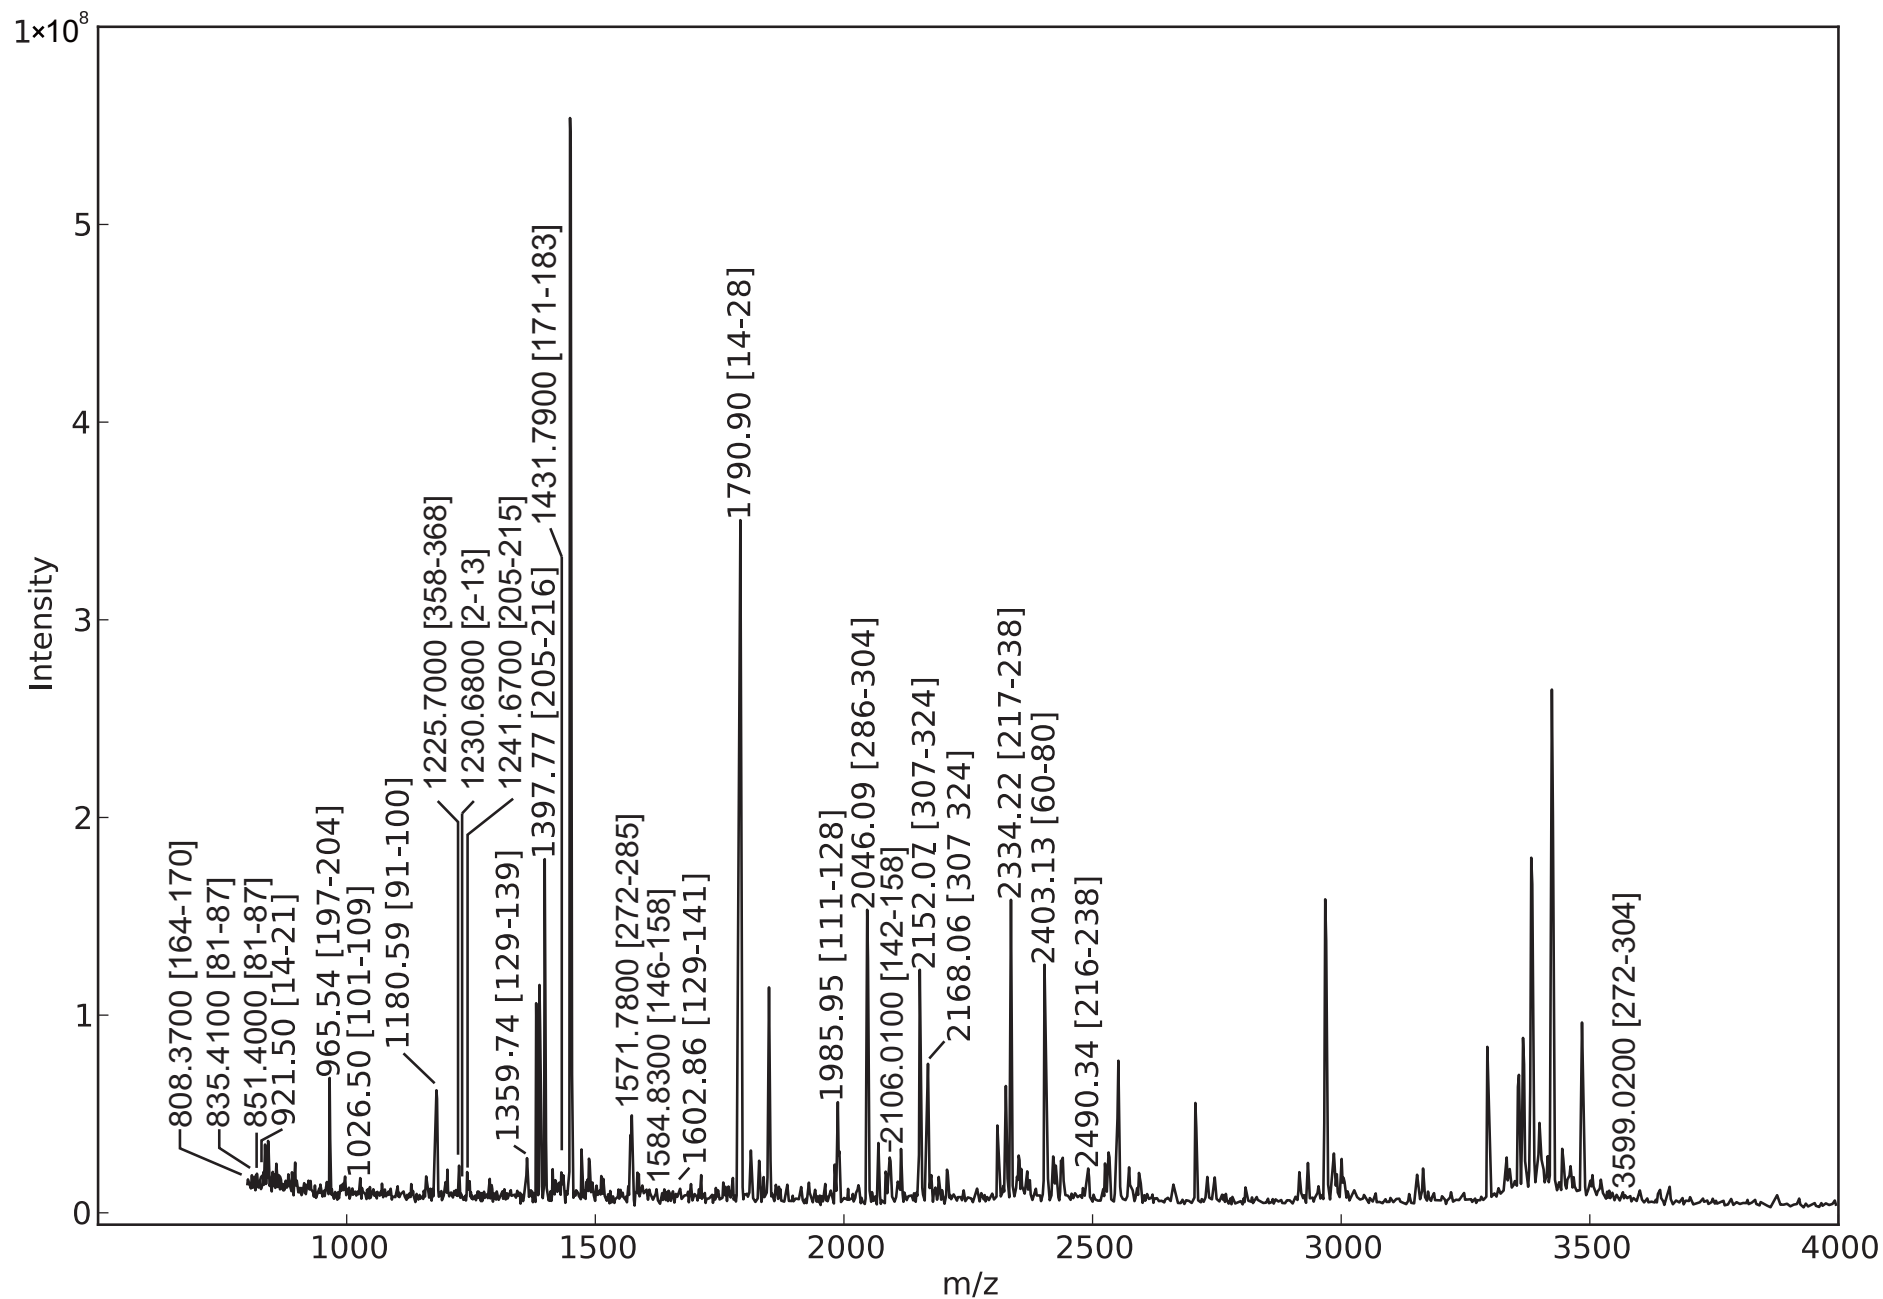

Spot No. 59

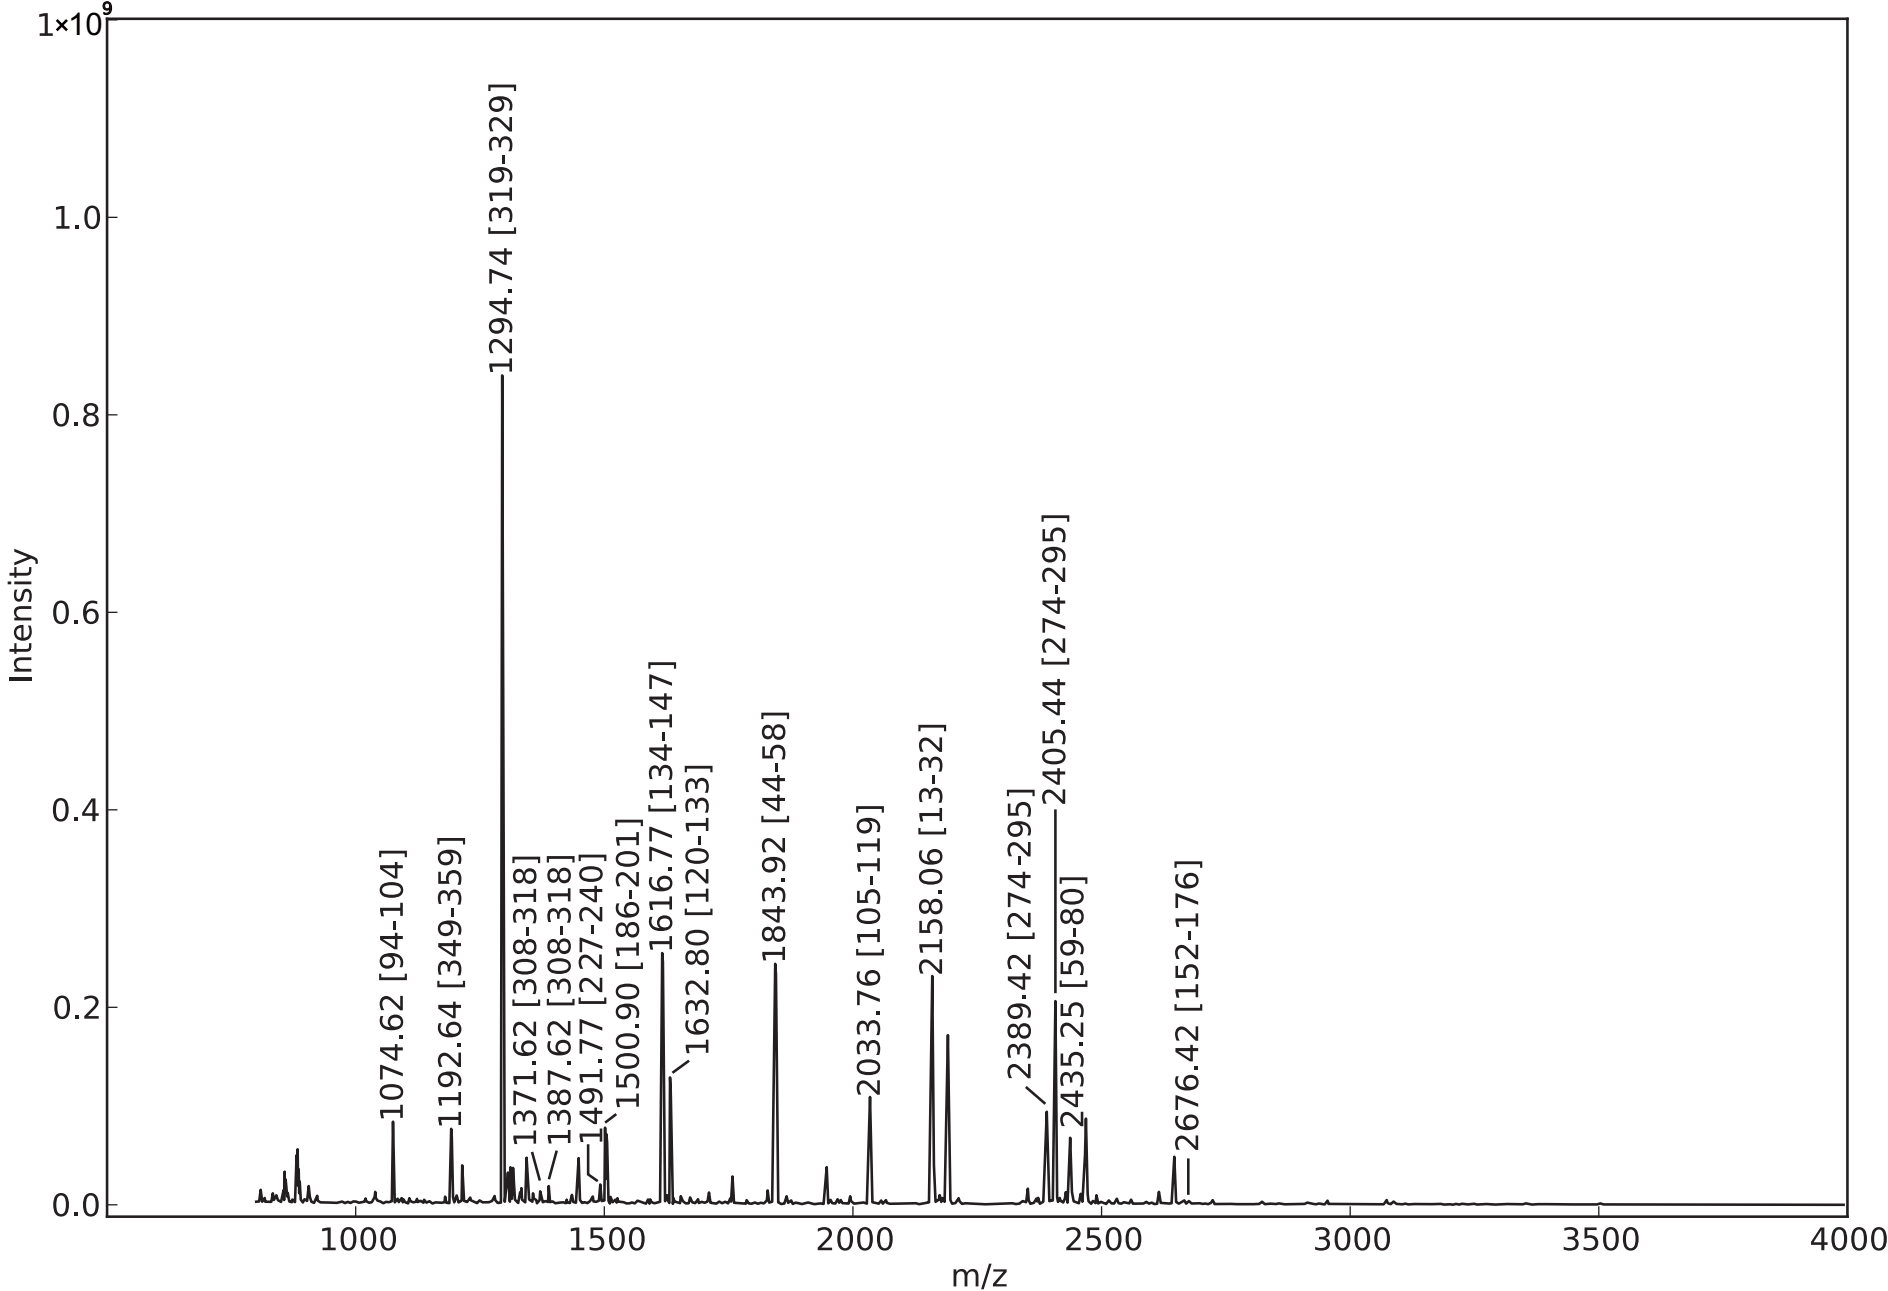

Spot No. 60

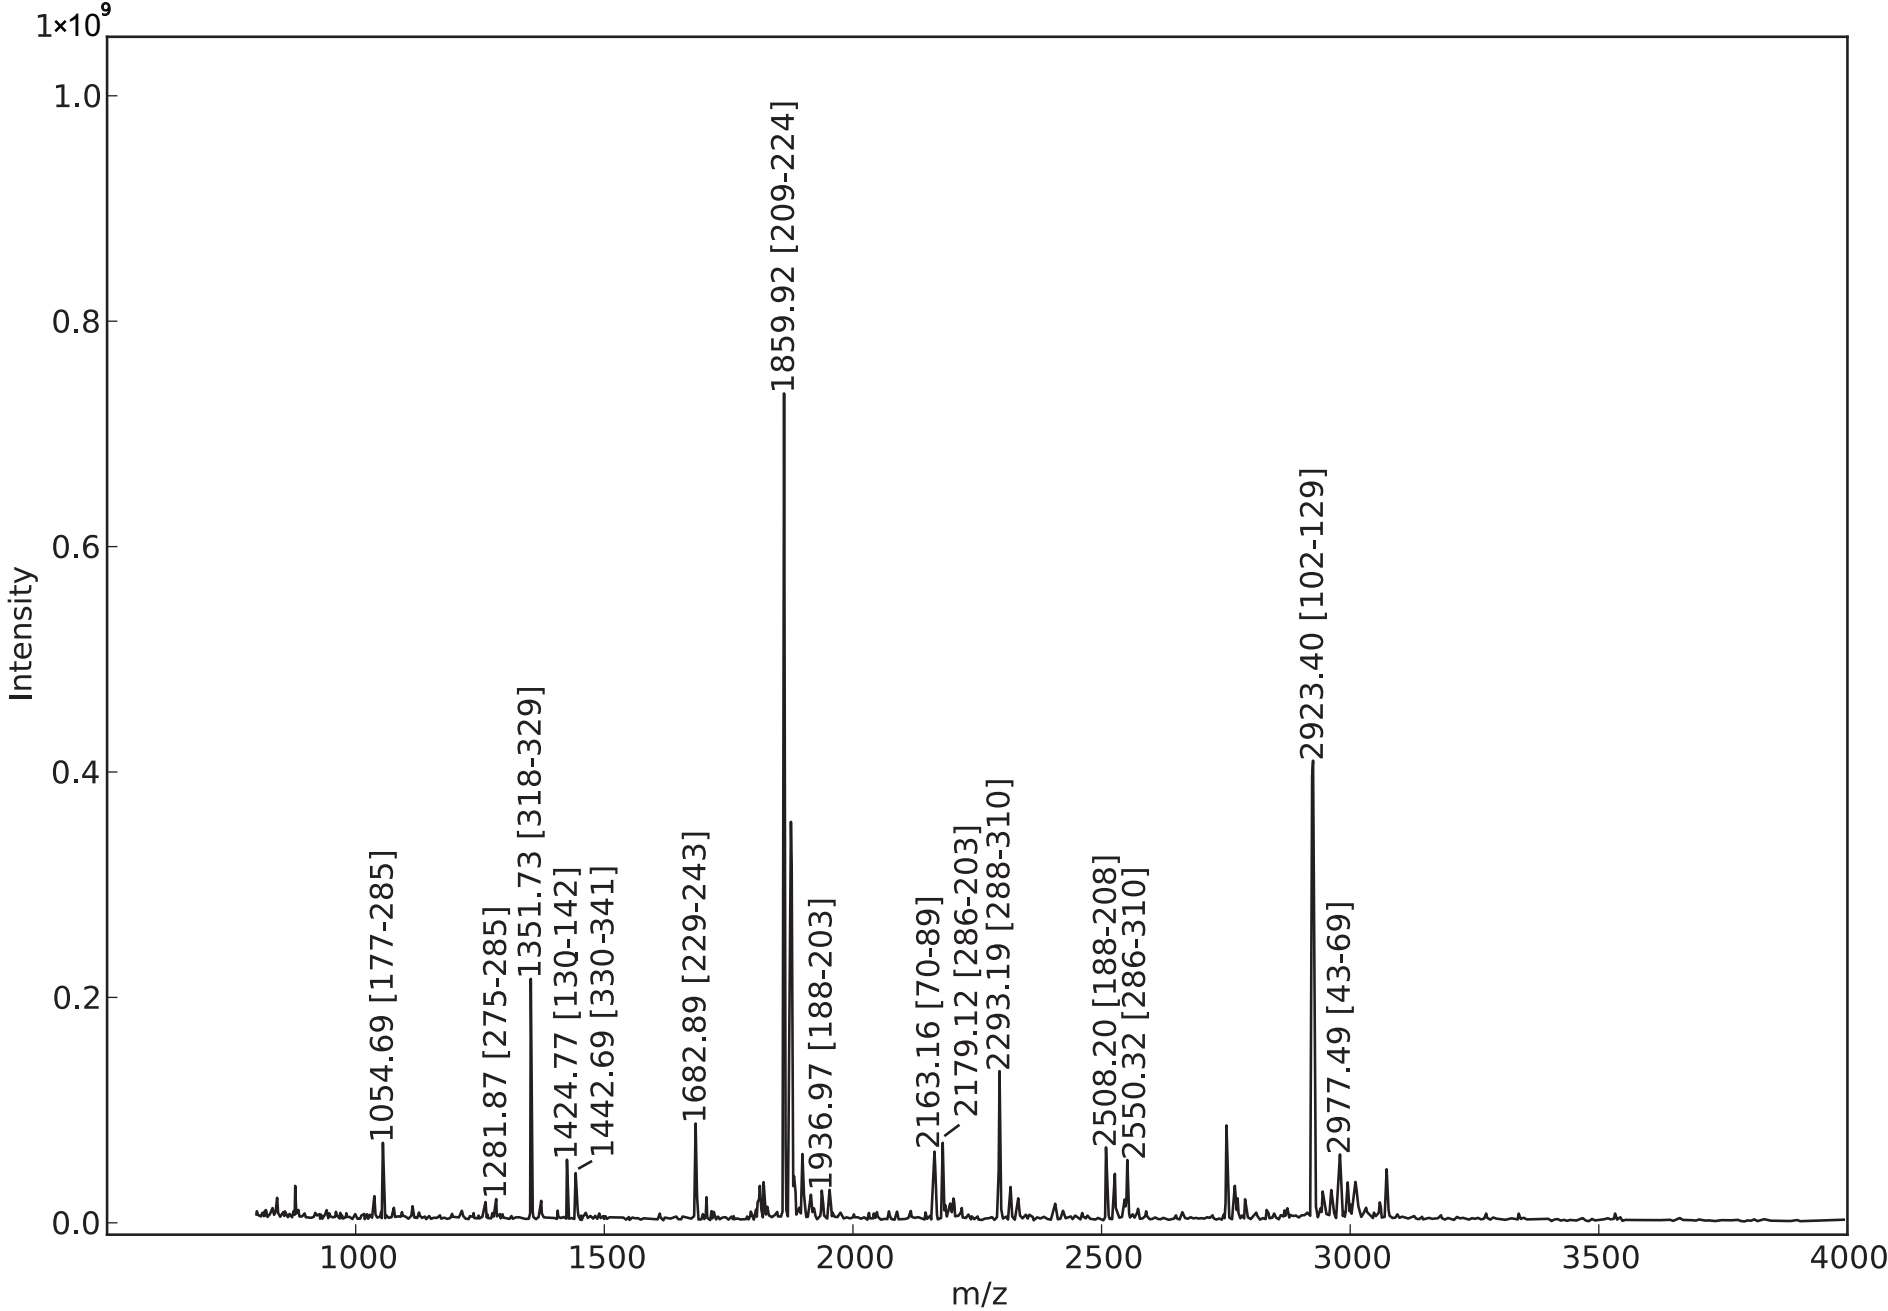

Spot No. 61

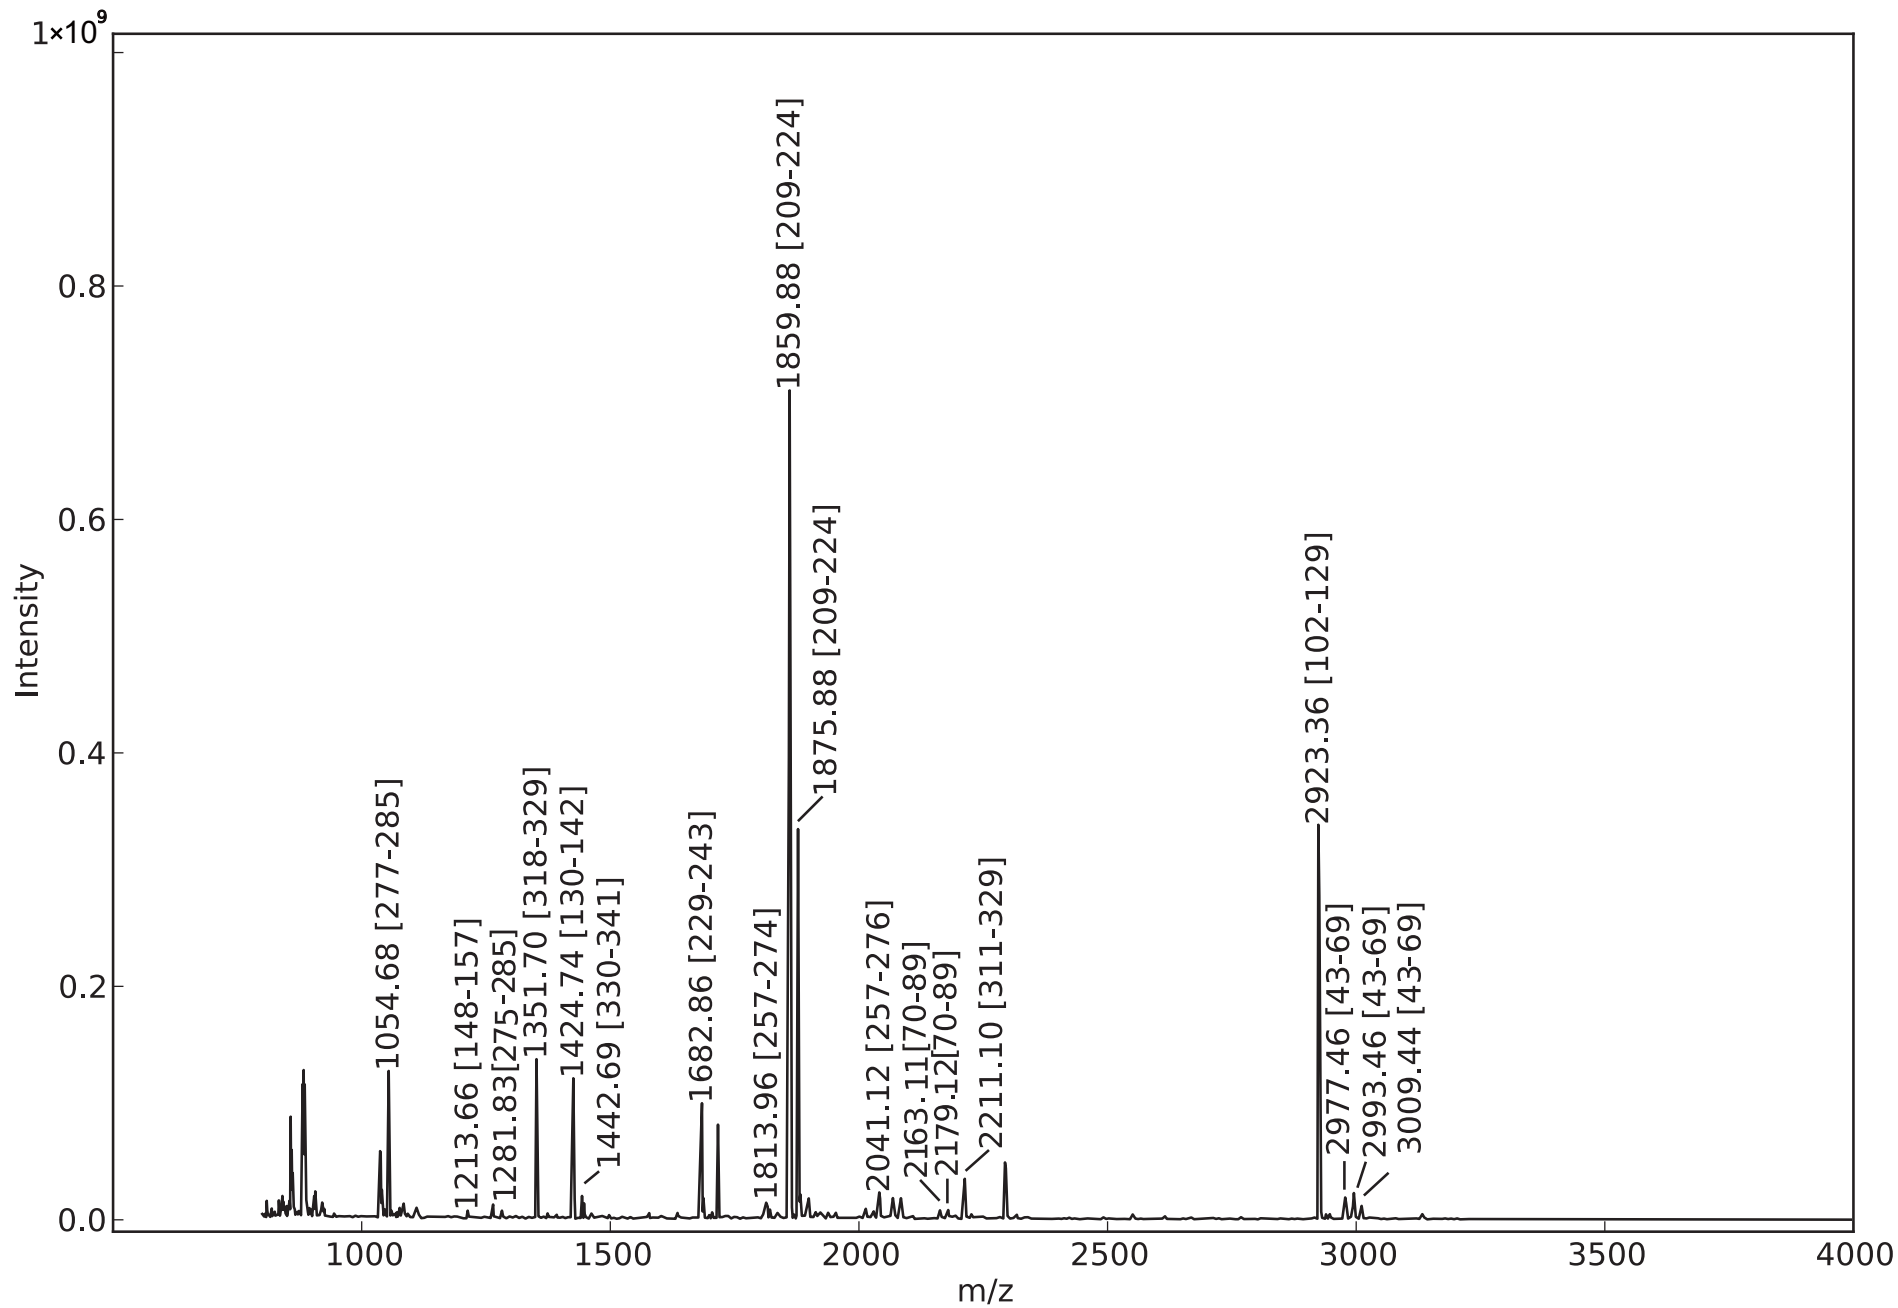

Spot No. 62

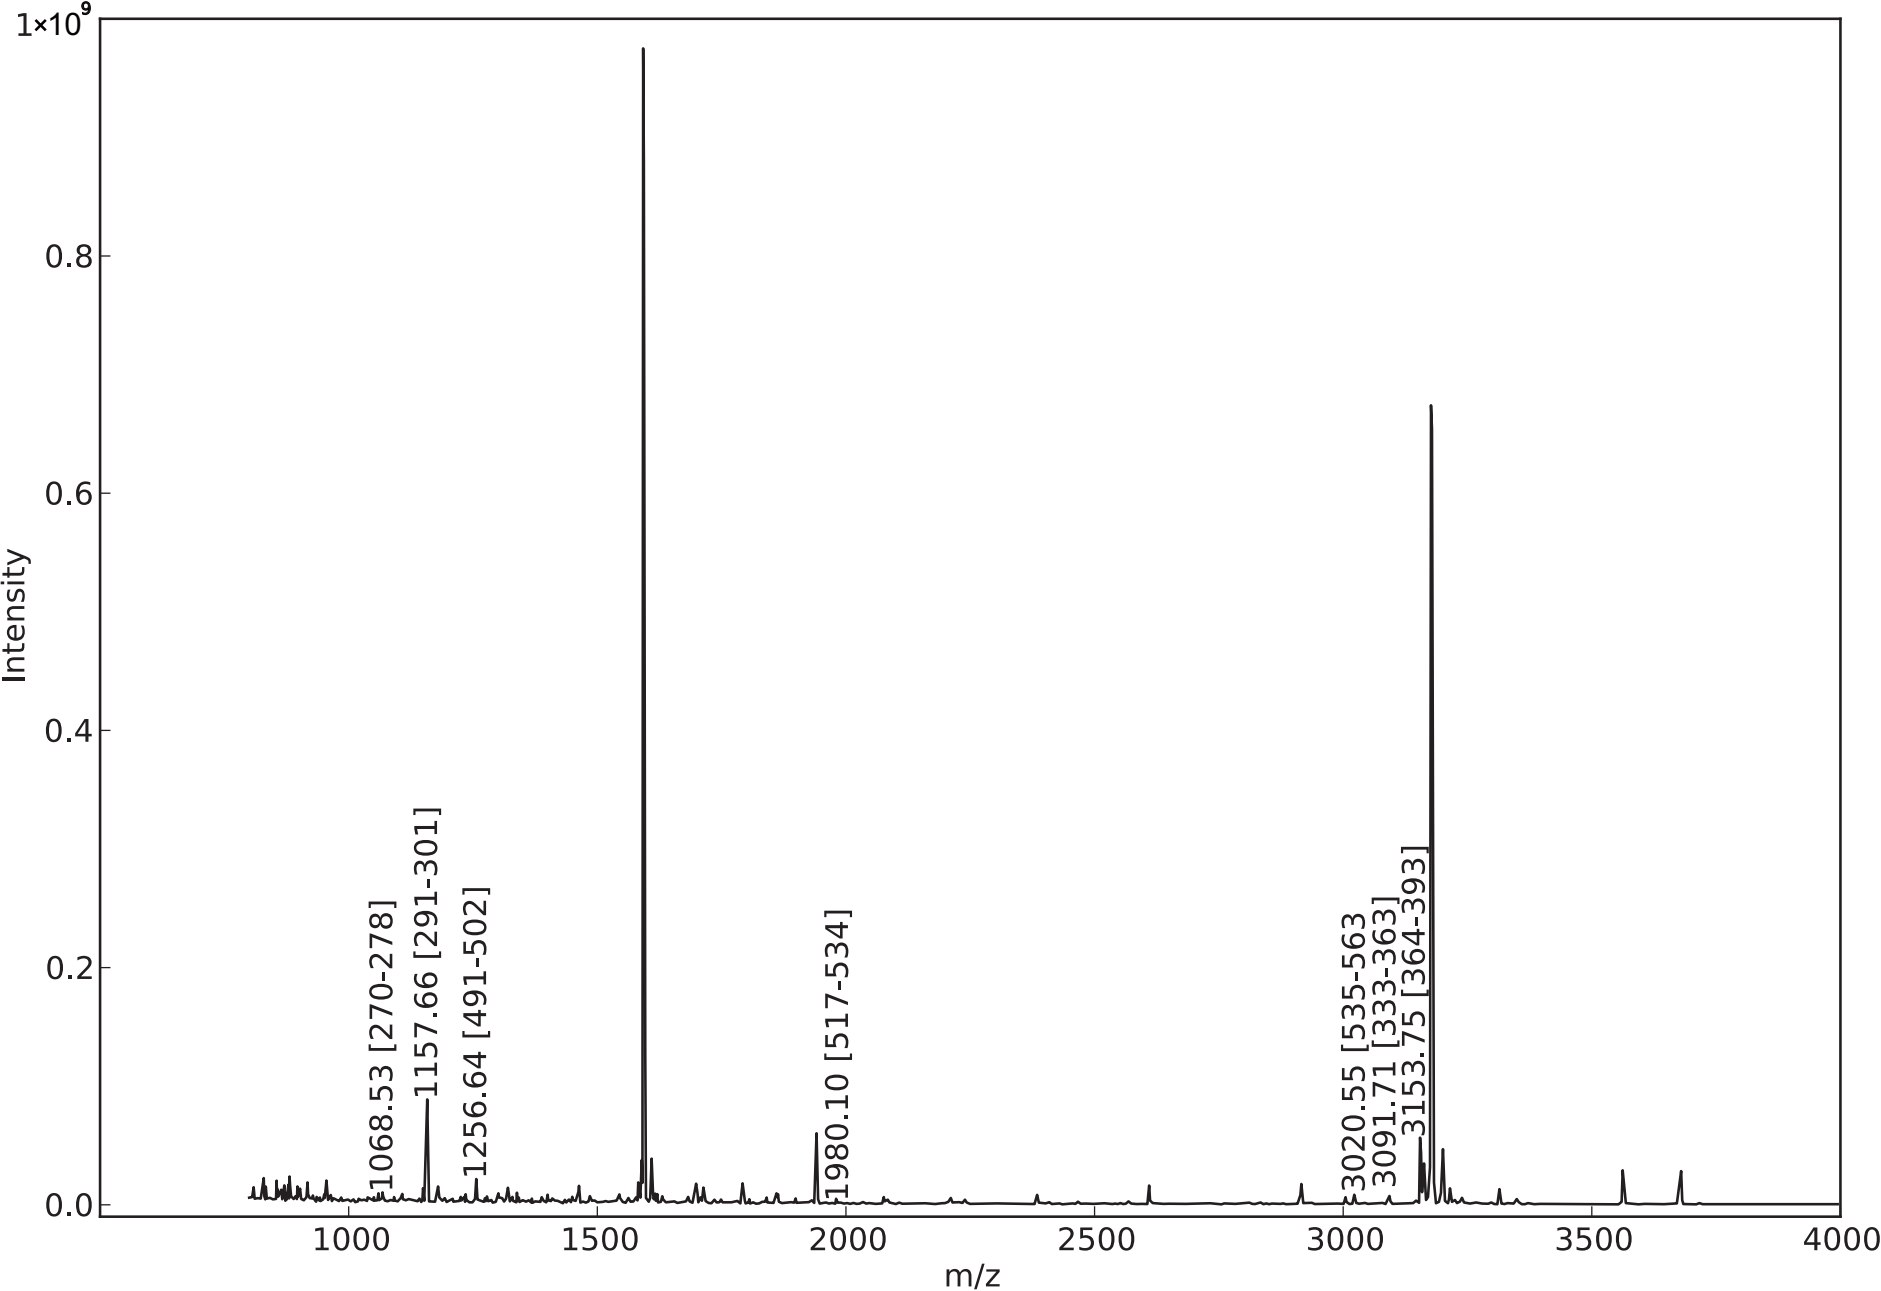



Spot No. 63

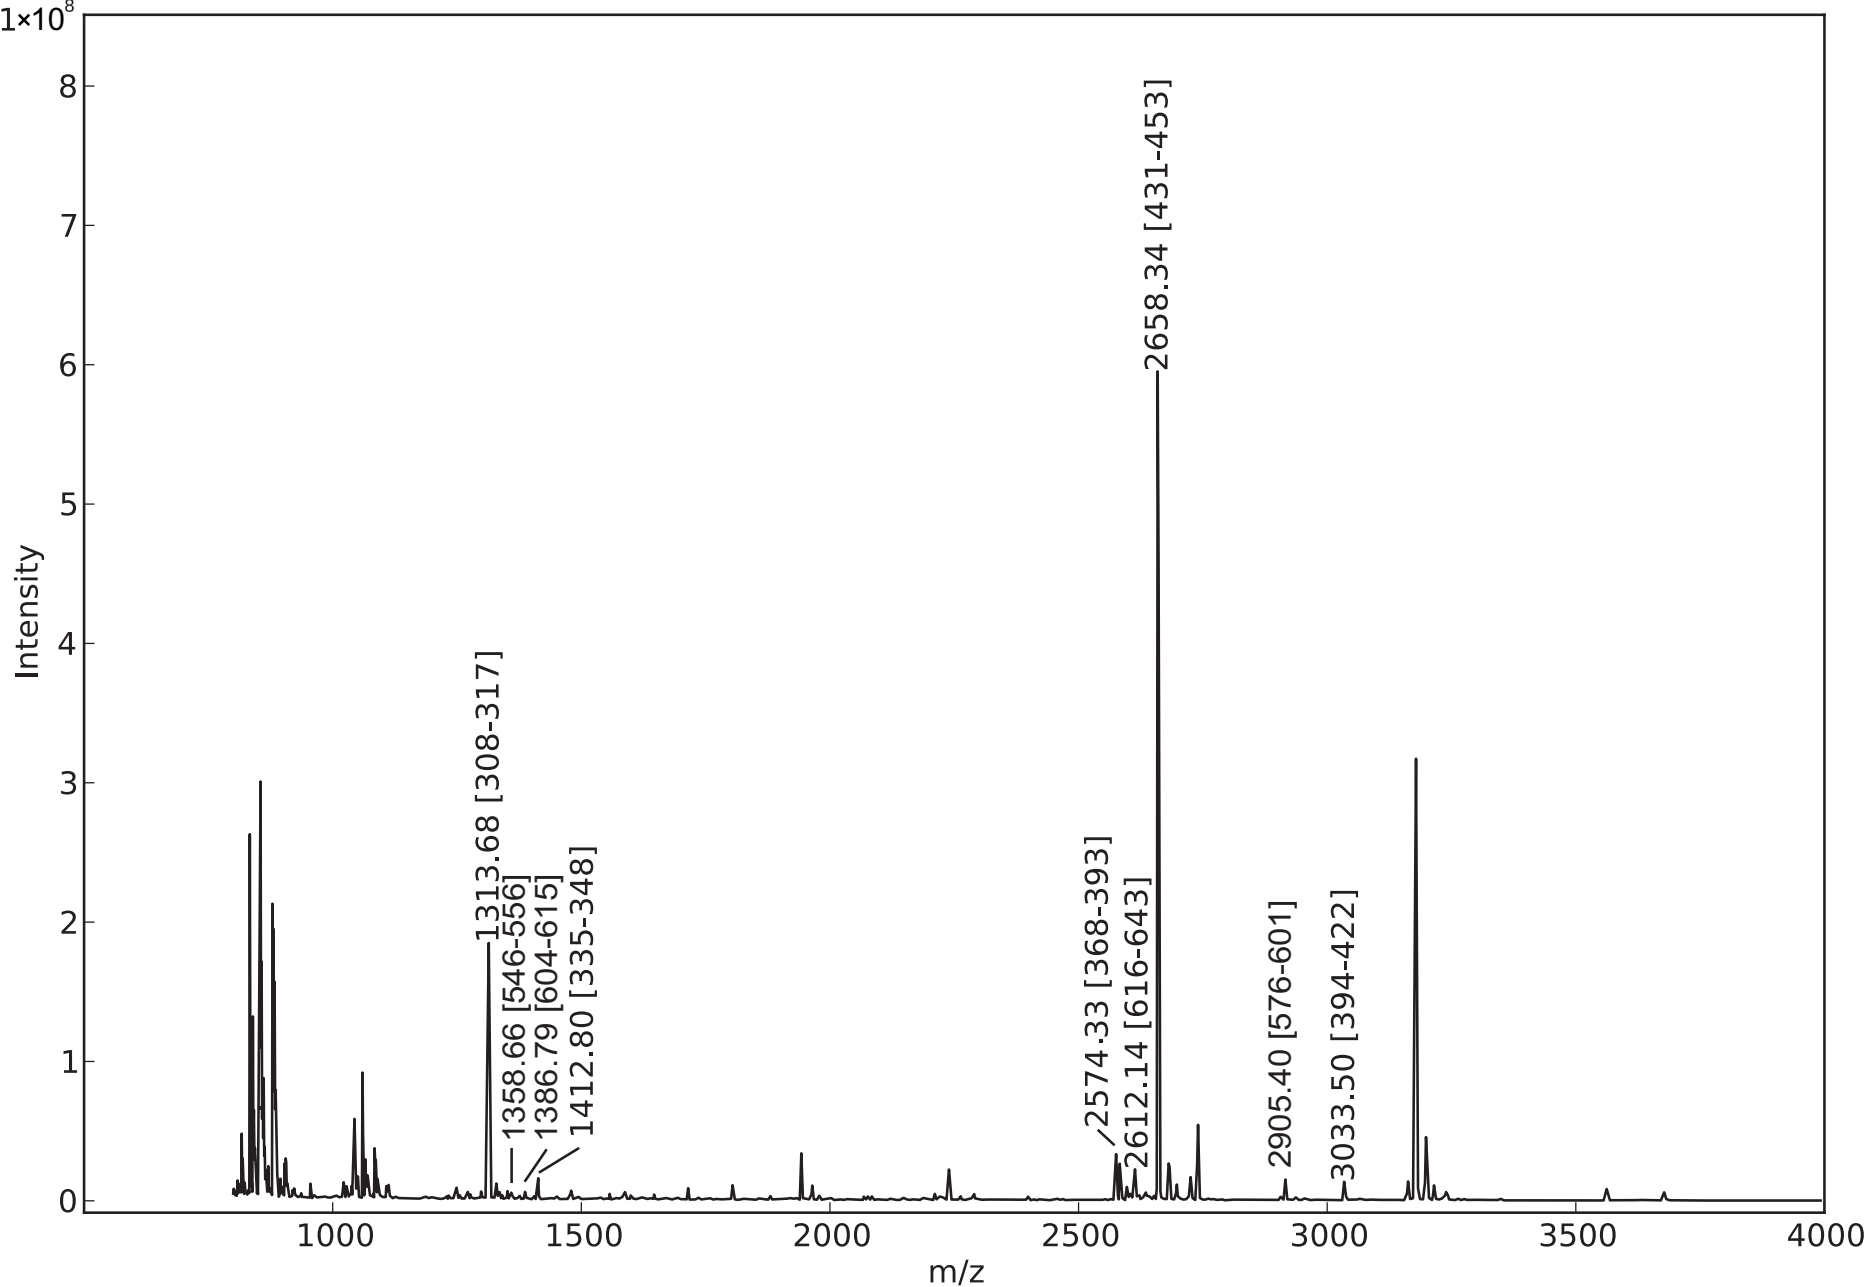

Spot No. 64

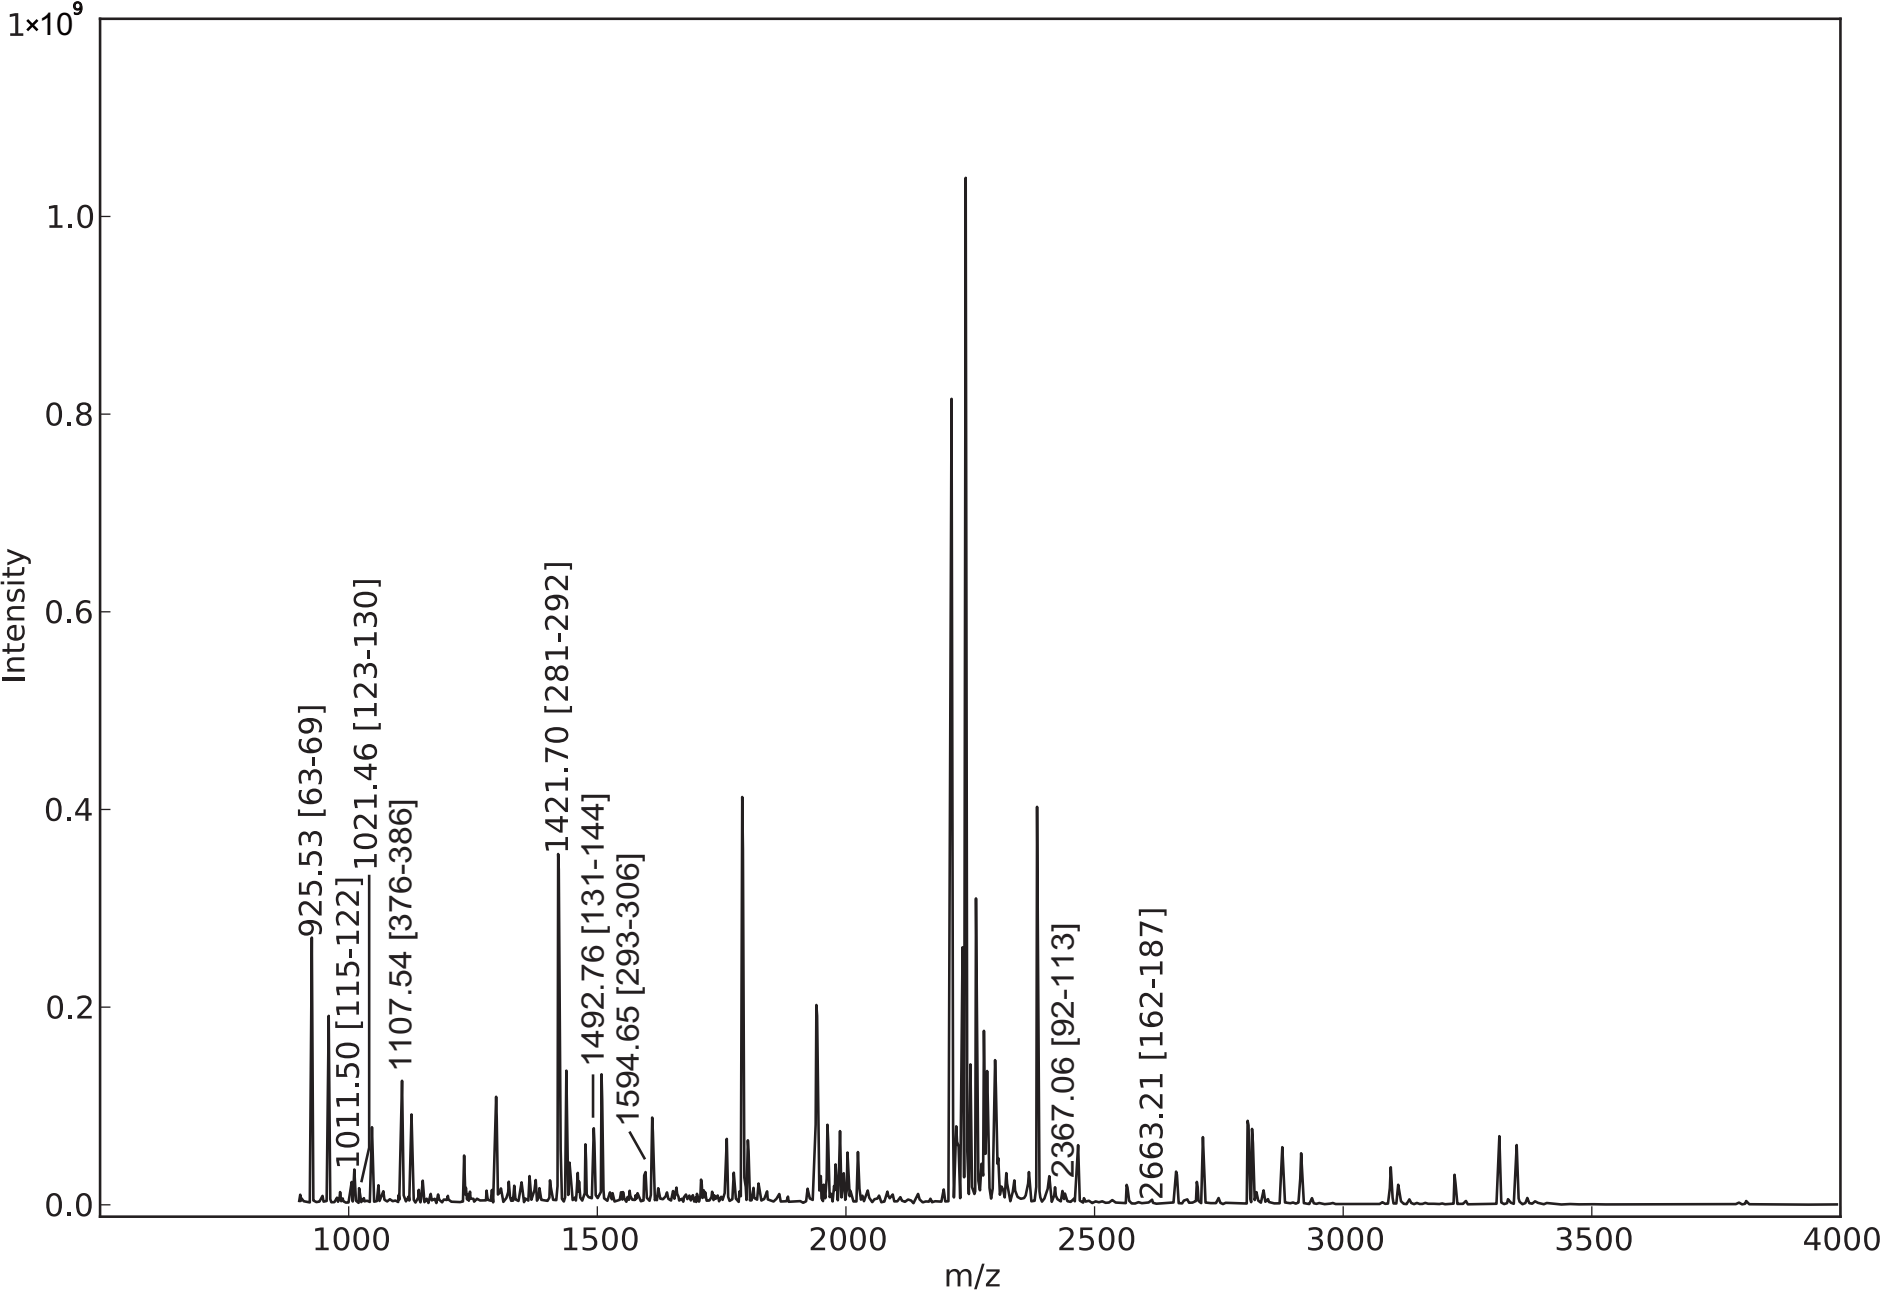

Spot No. 65

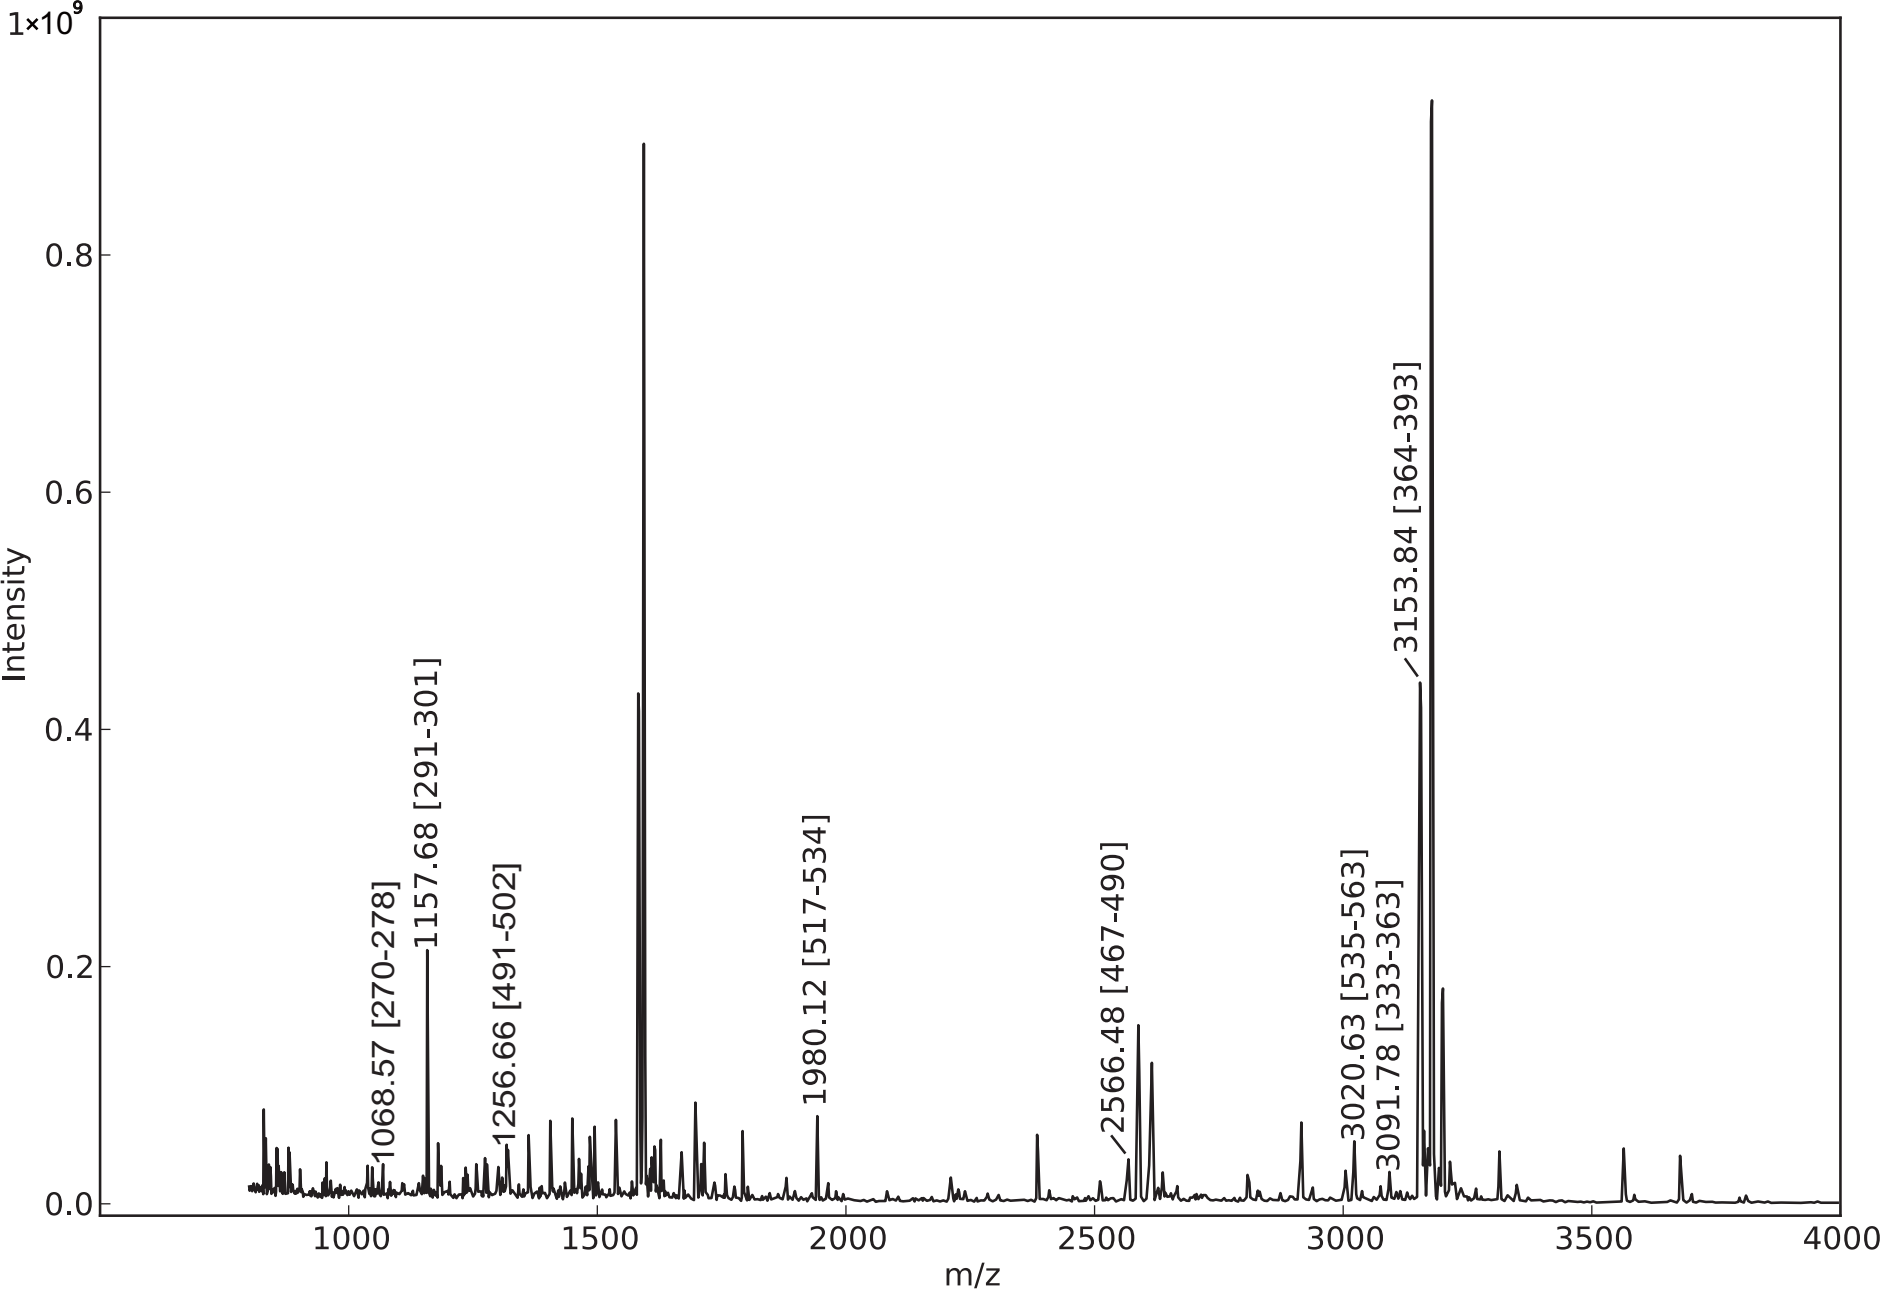

Spot No. 66

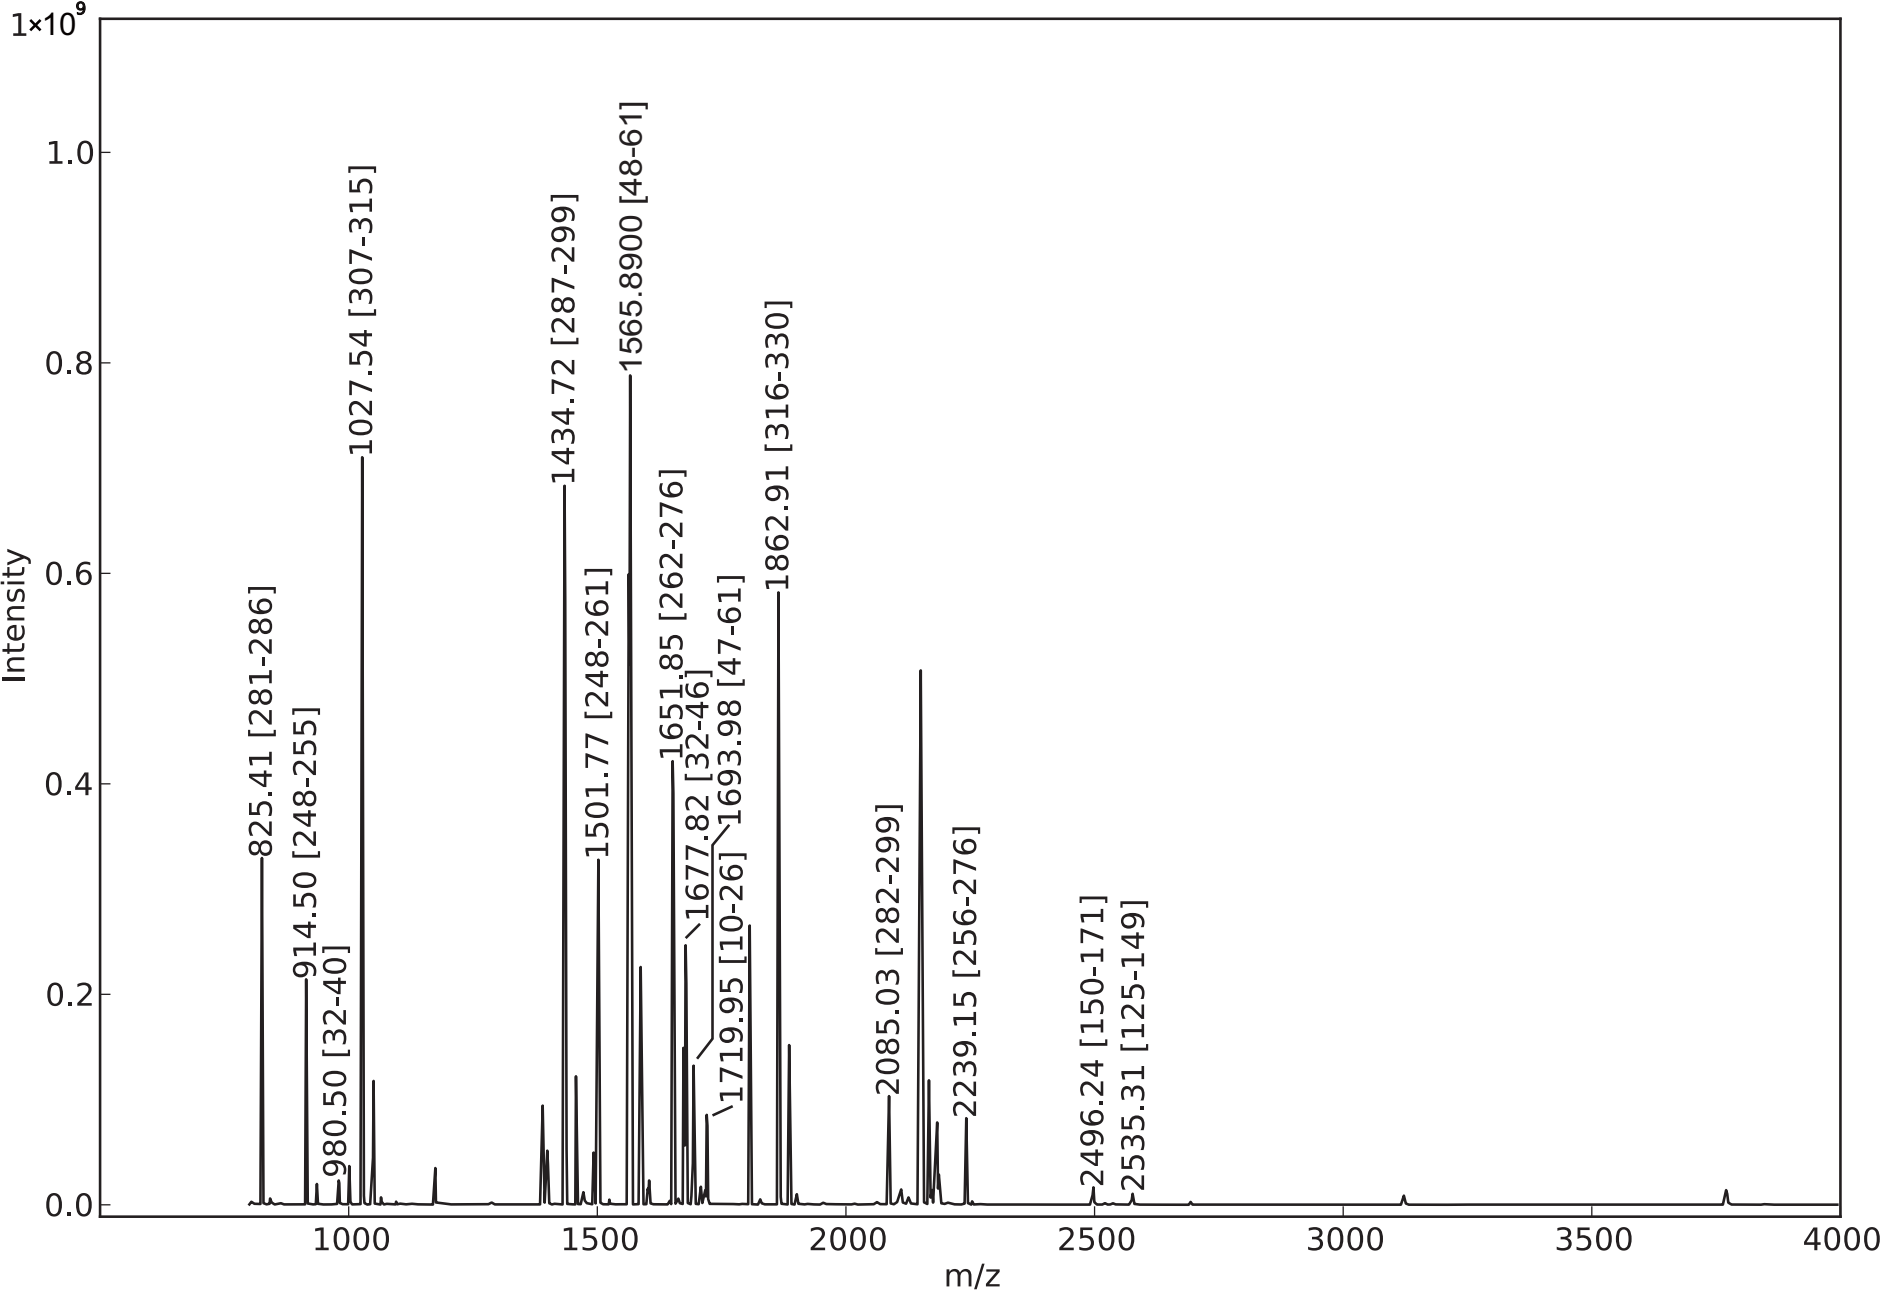

Spot No. 67

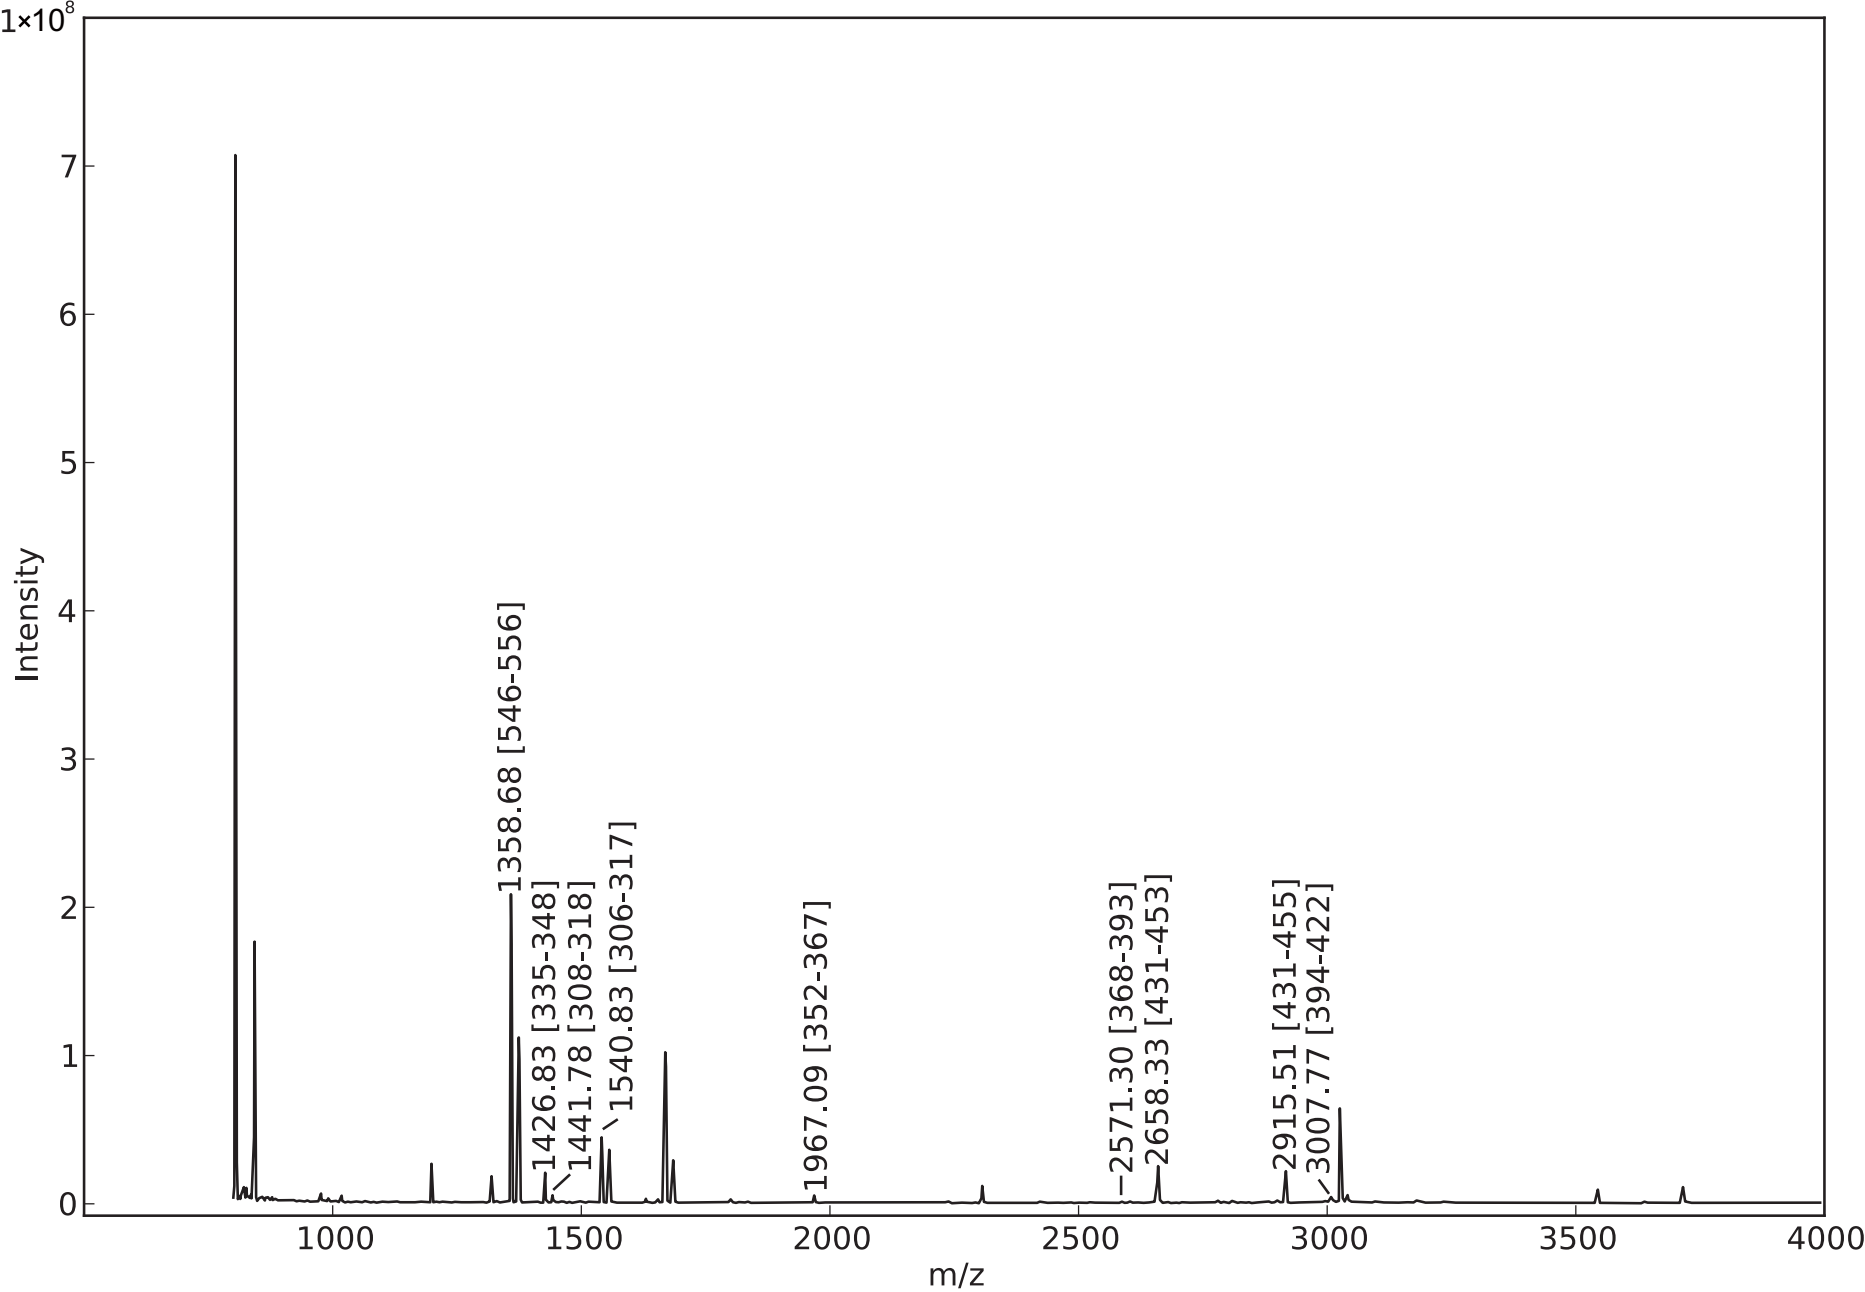

Spot No. 68

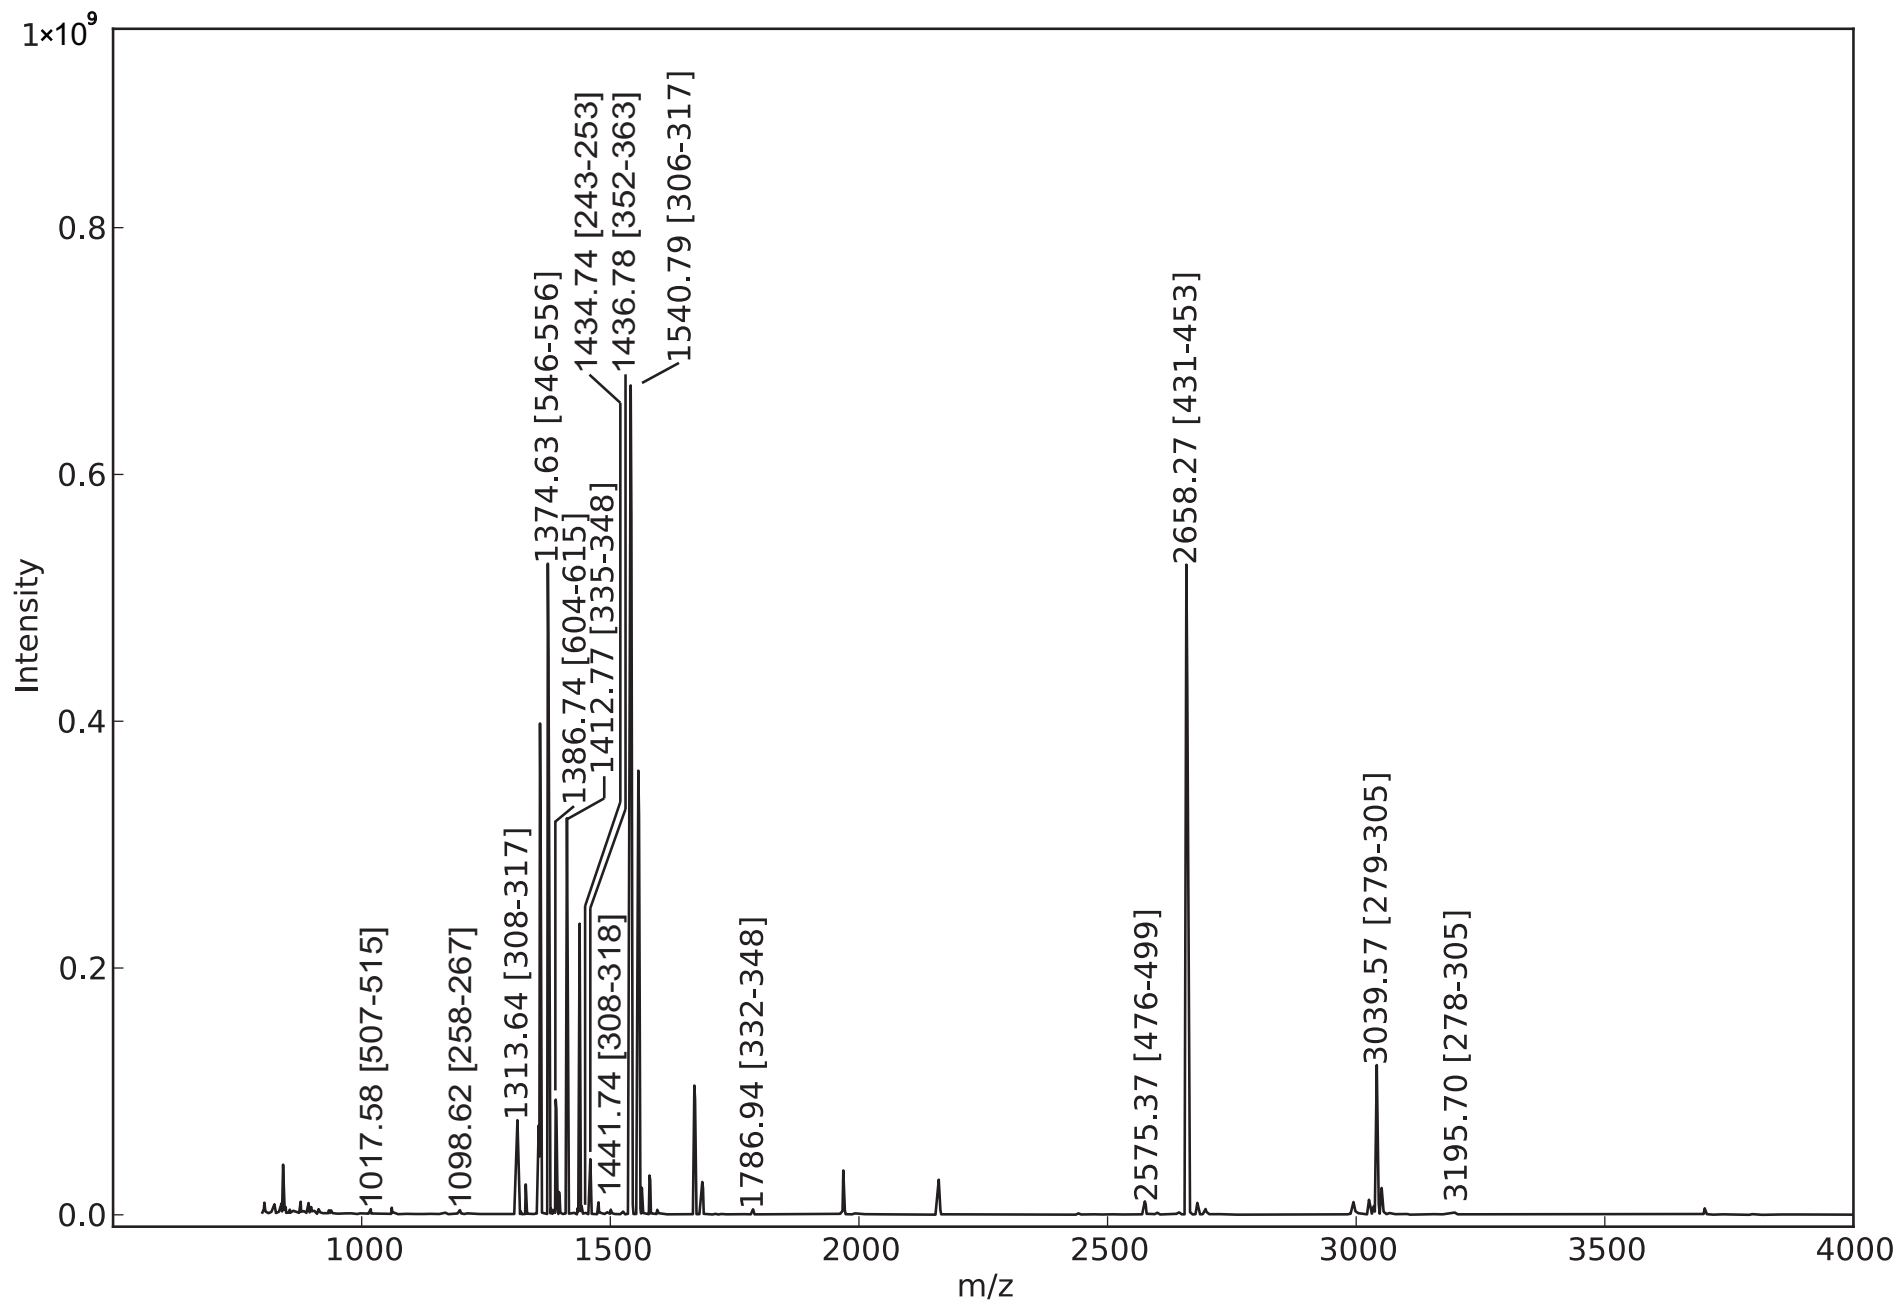

Spot No. 69

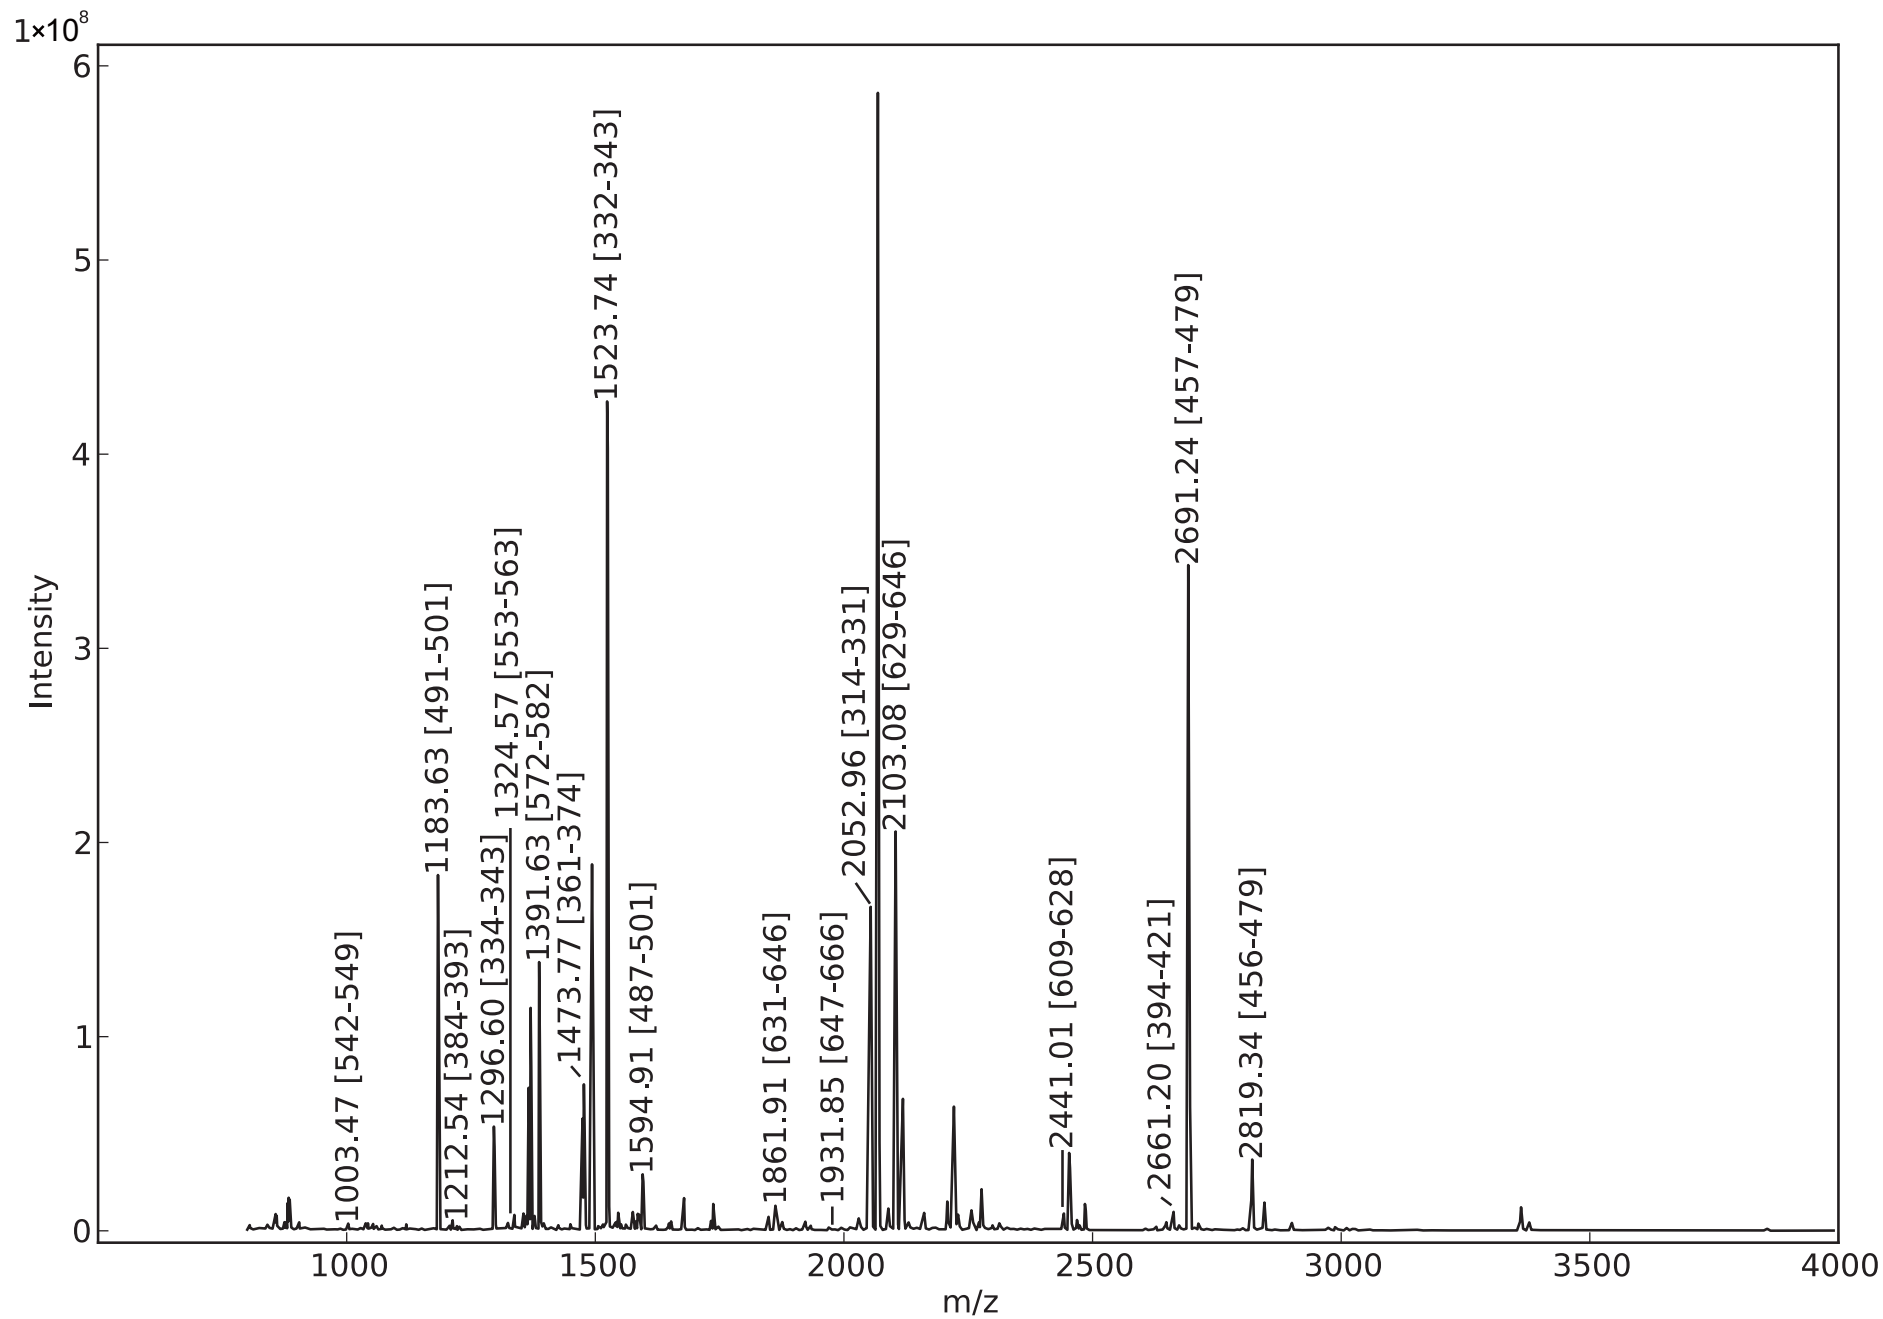

Spot No. 70

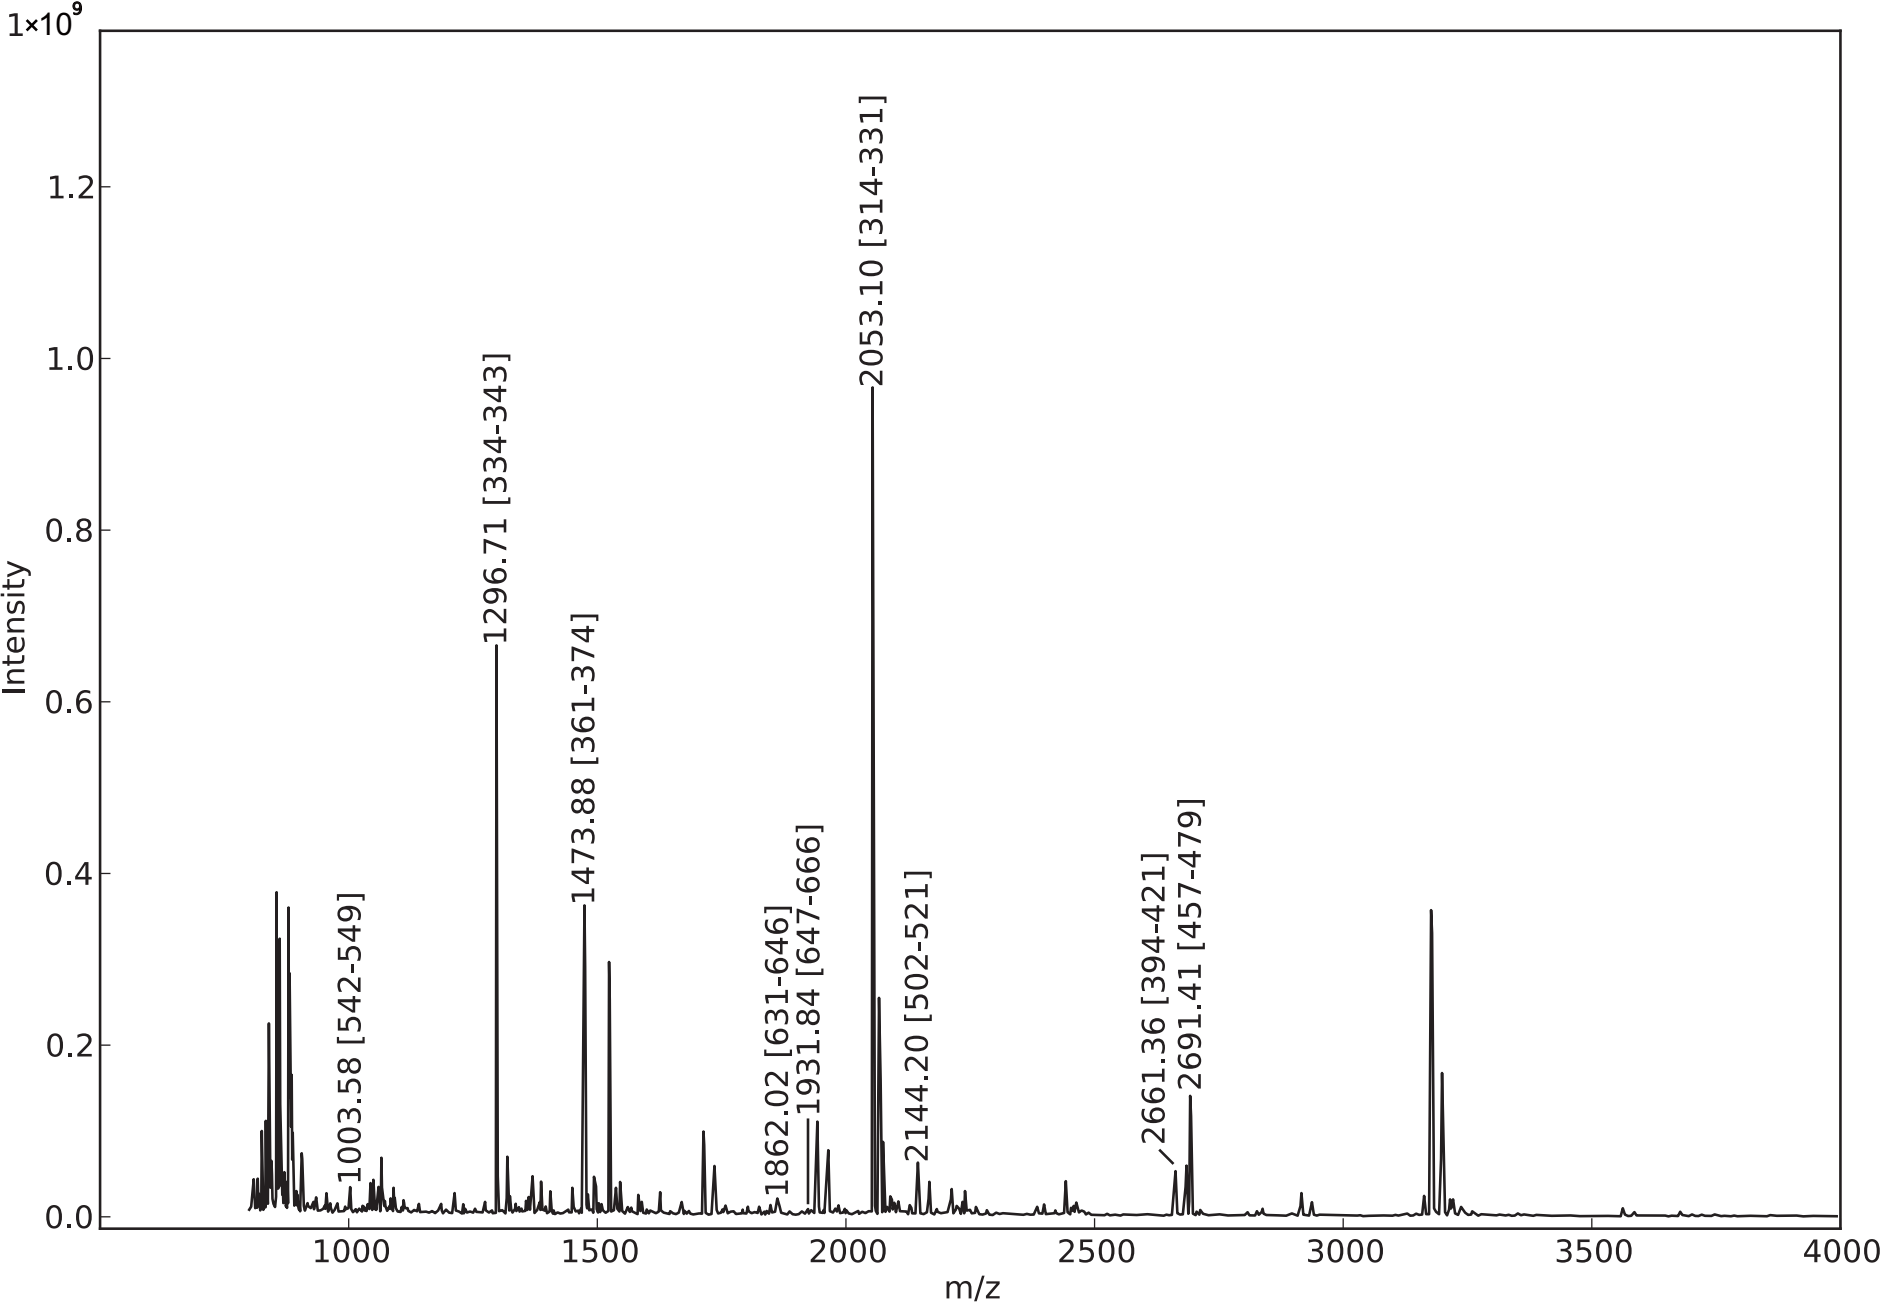



Spot No. 71

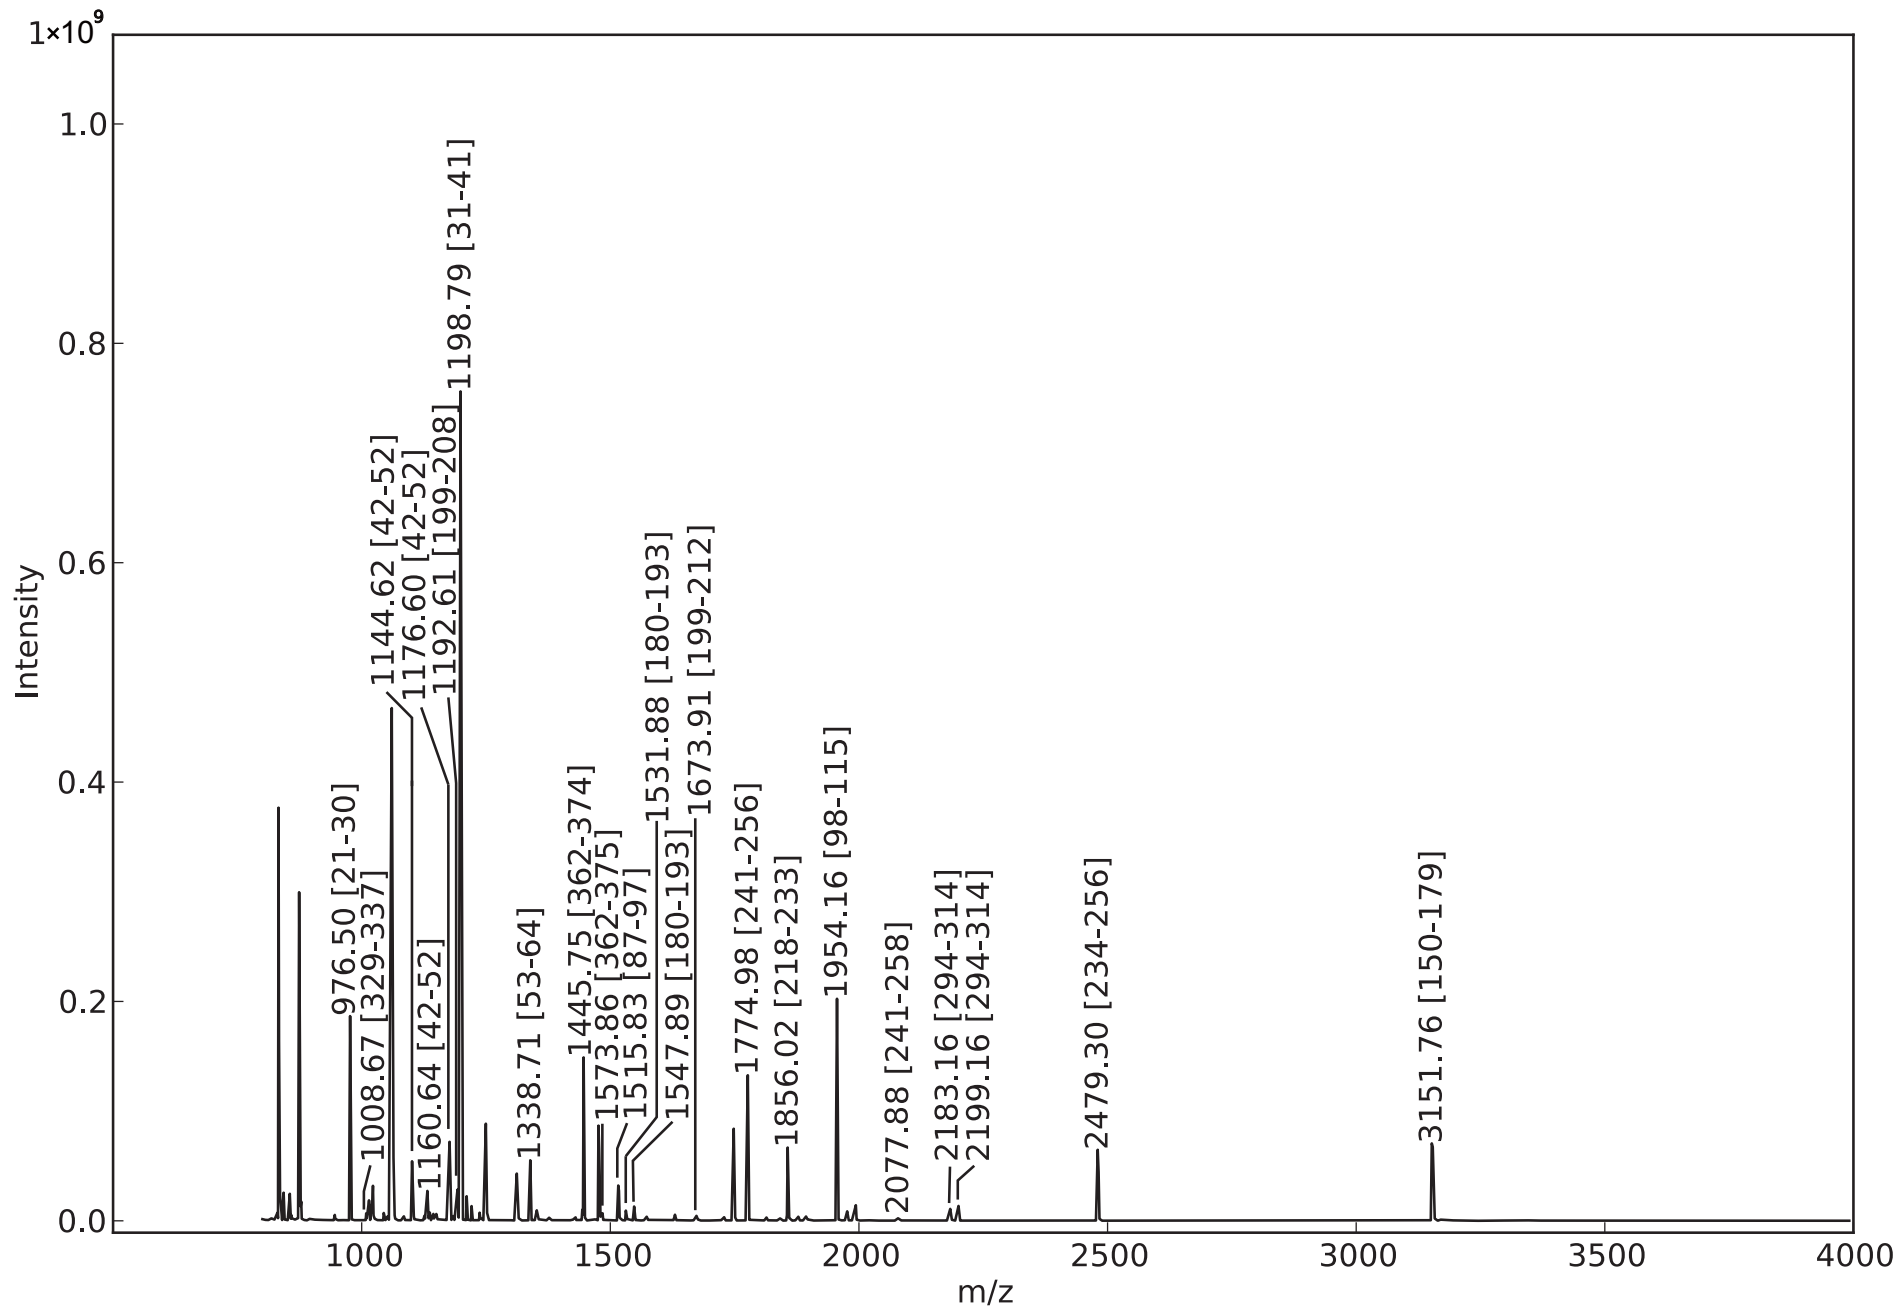

Spot No. 72

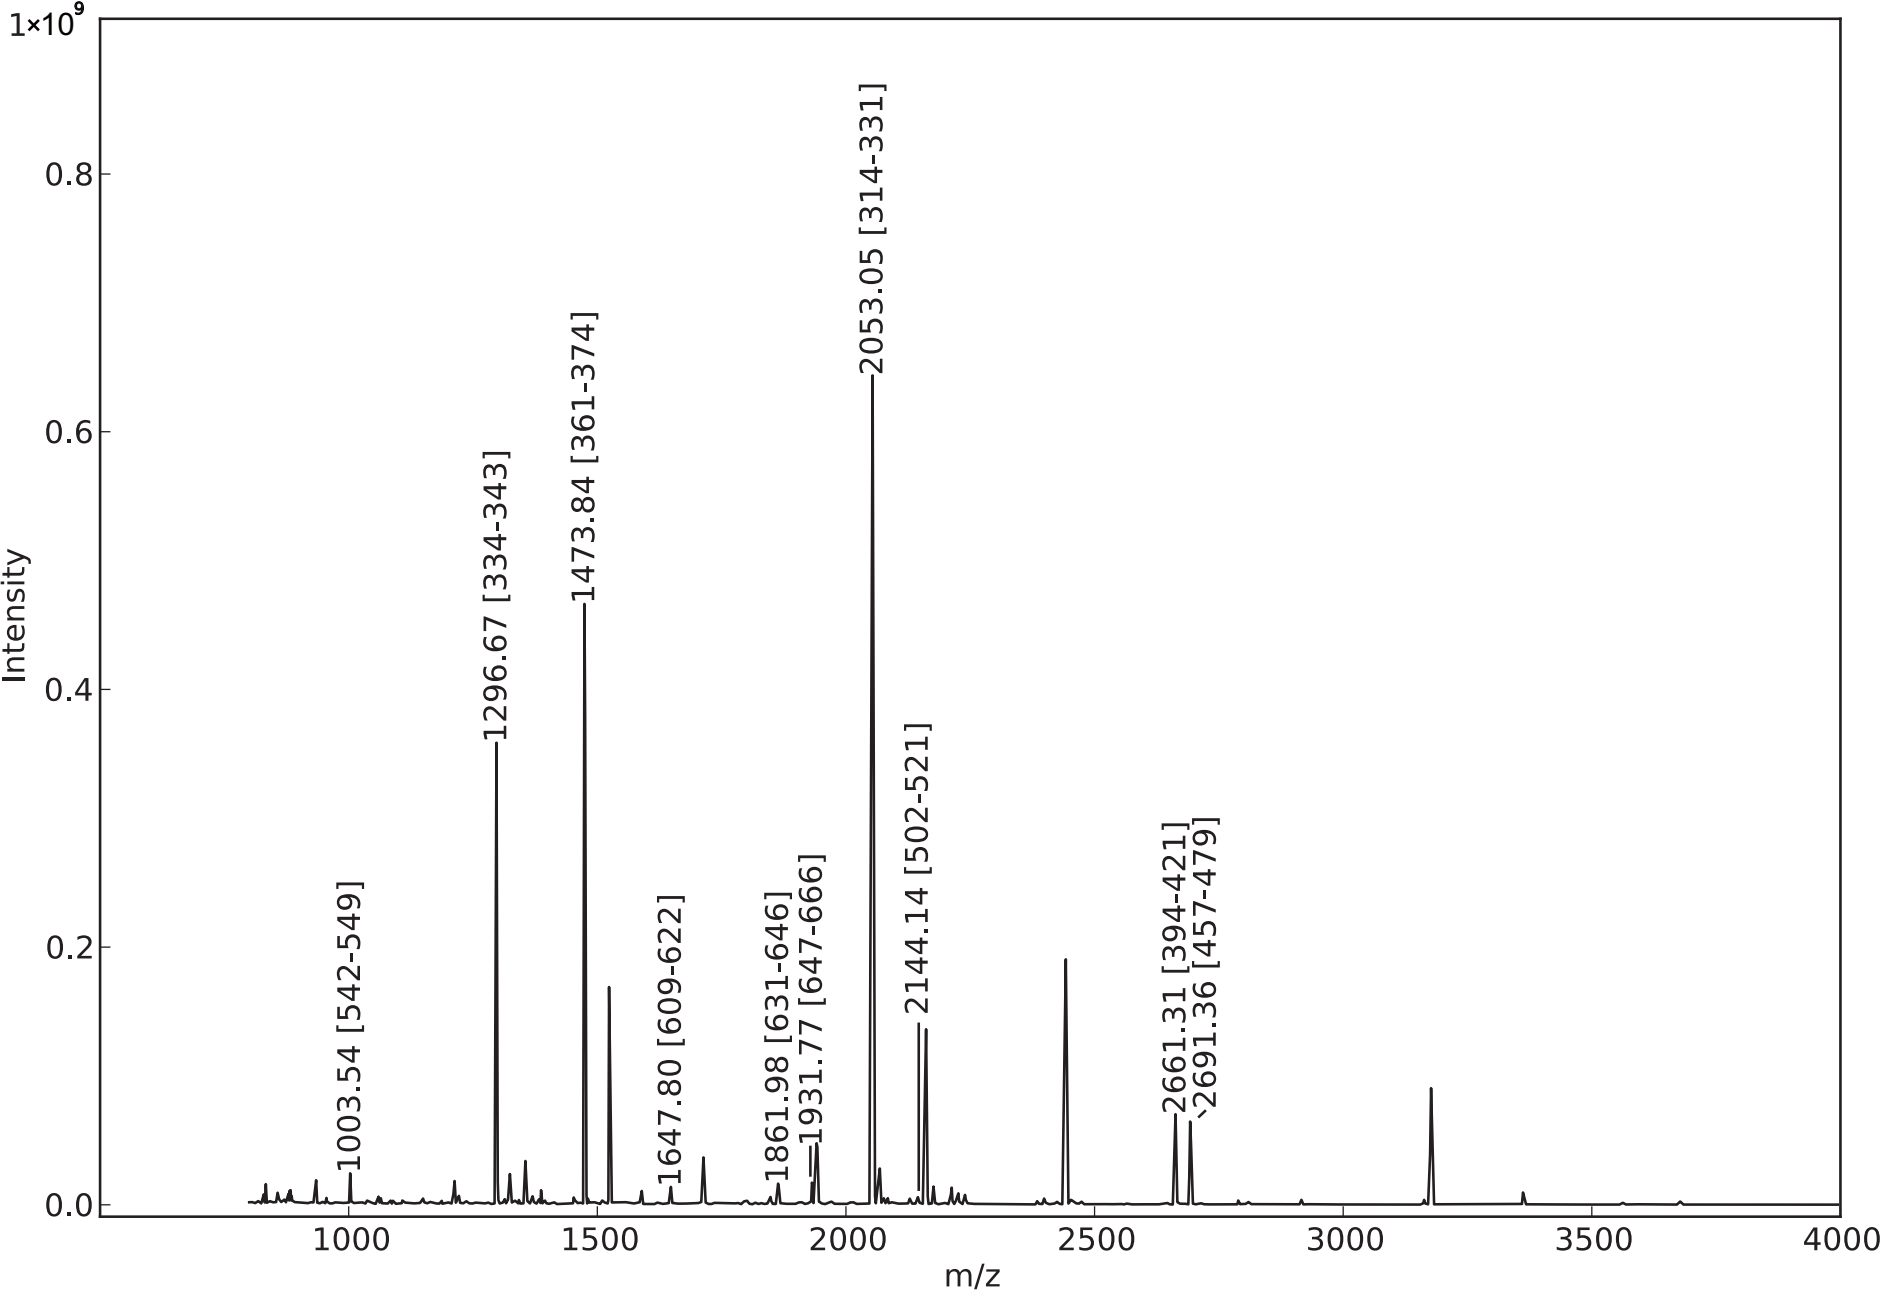

Spot No. 73

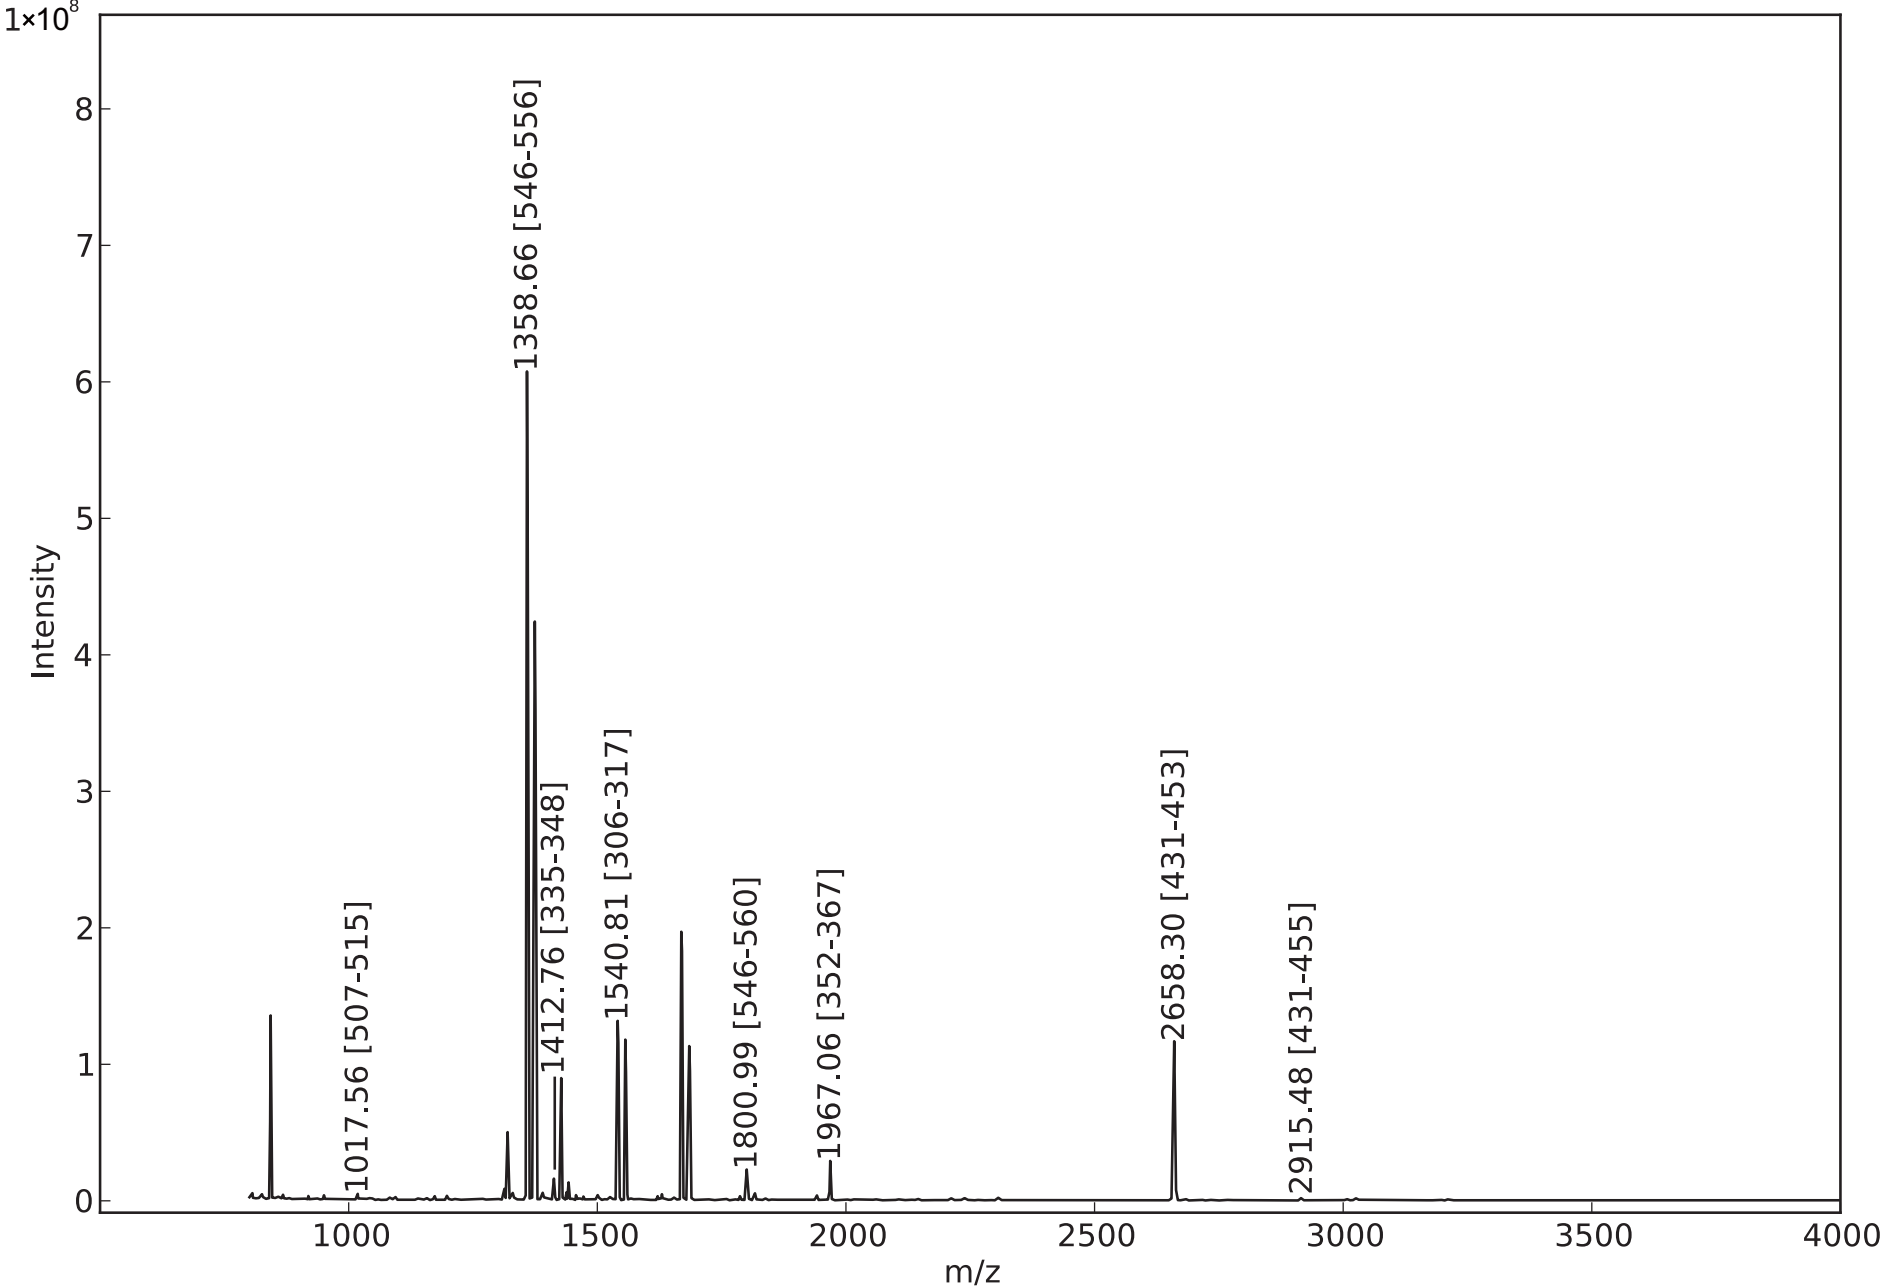

Spot No. 74

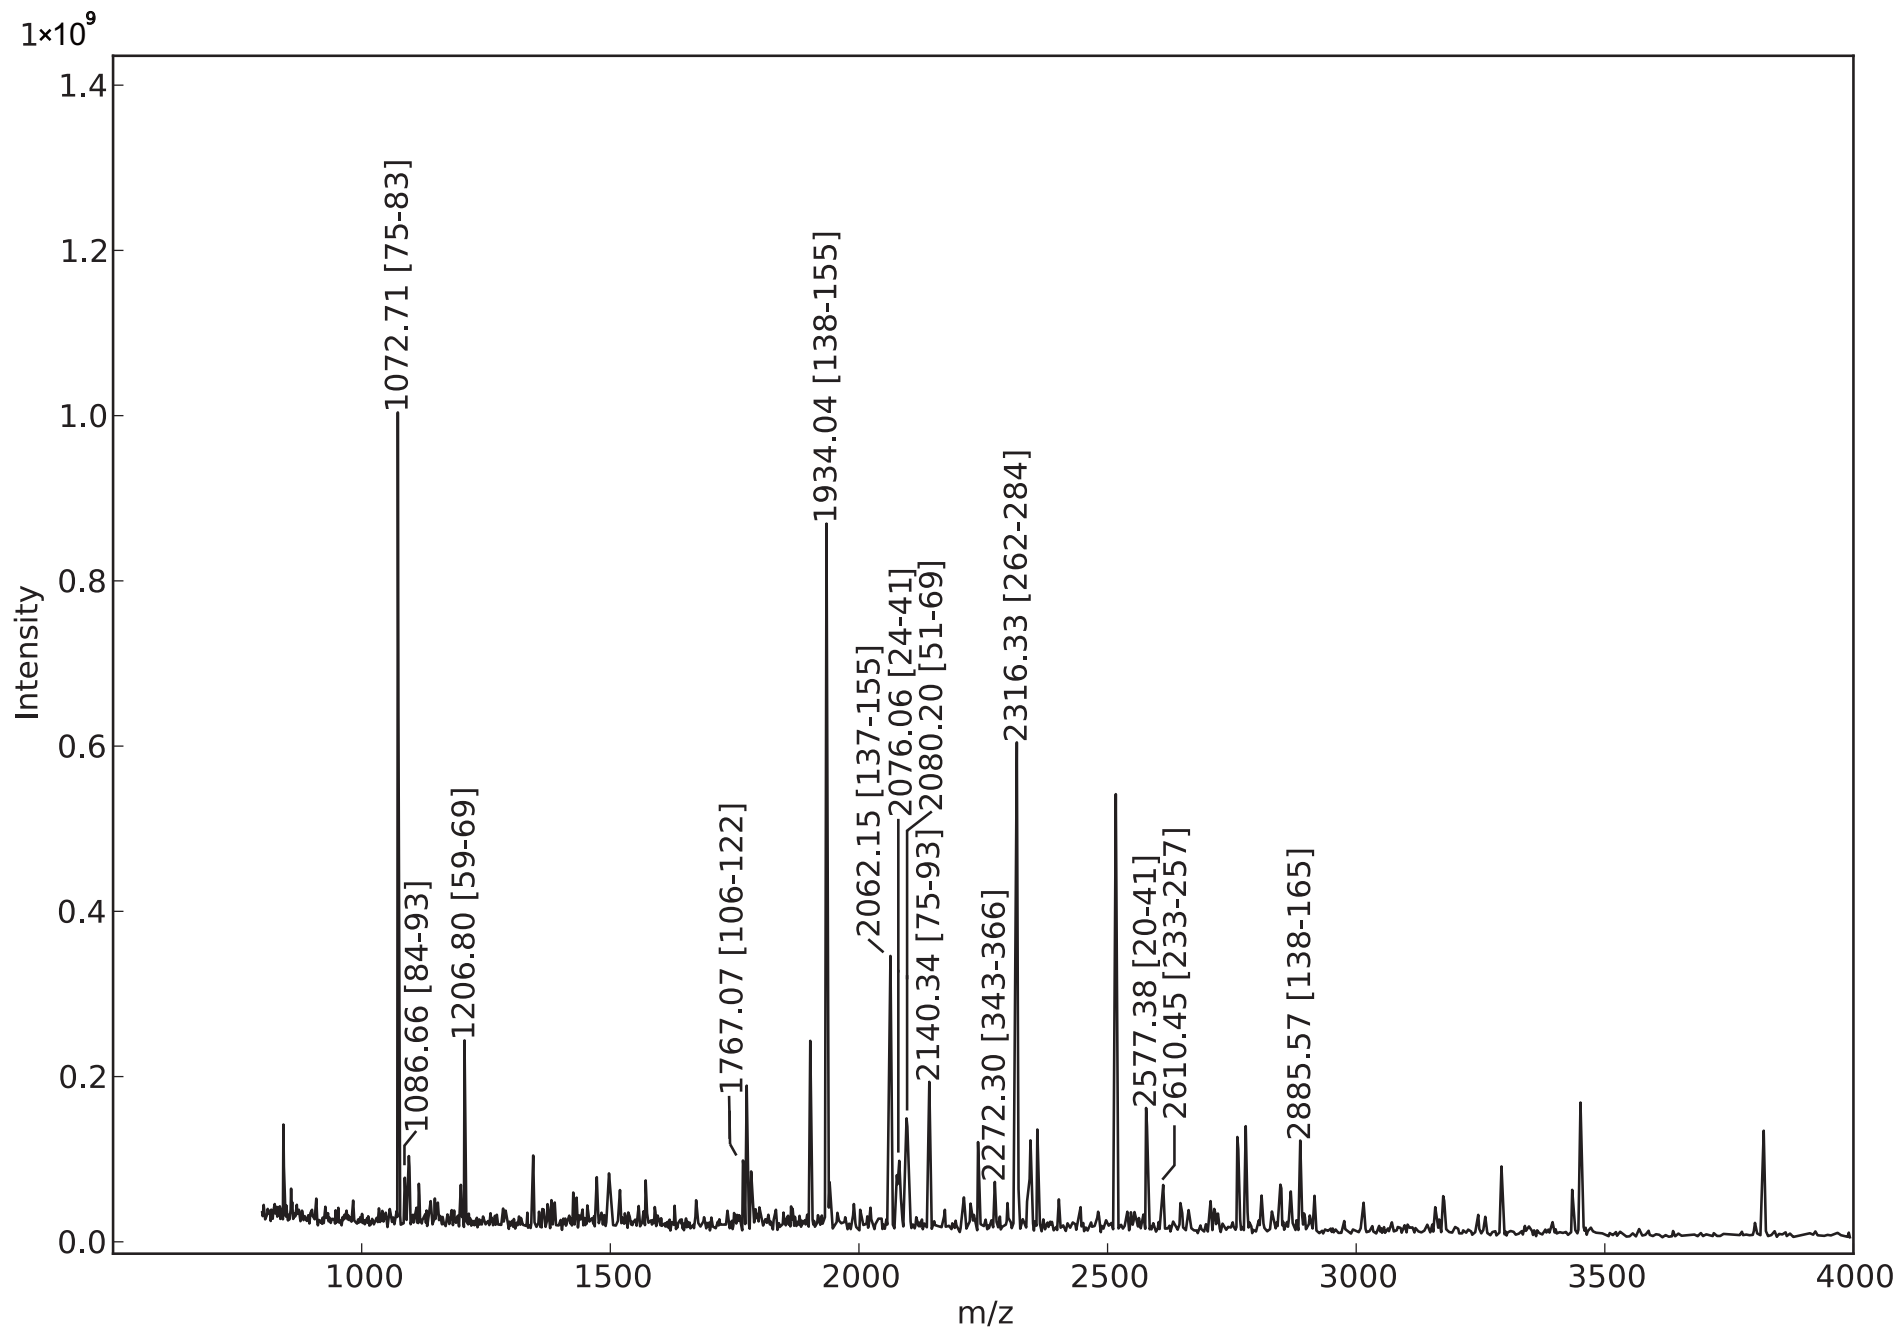

Spot No. 75

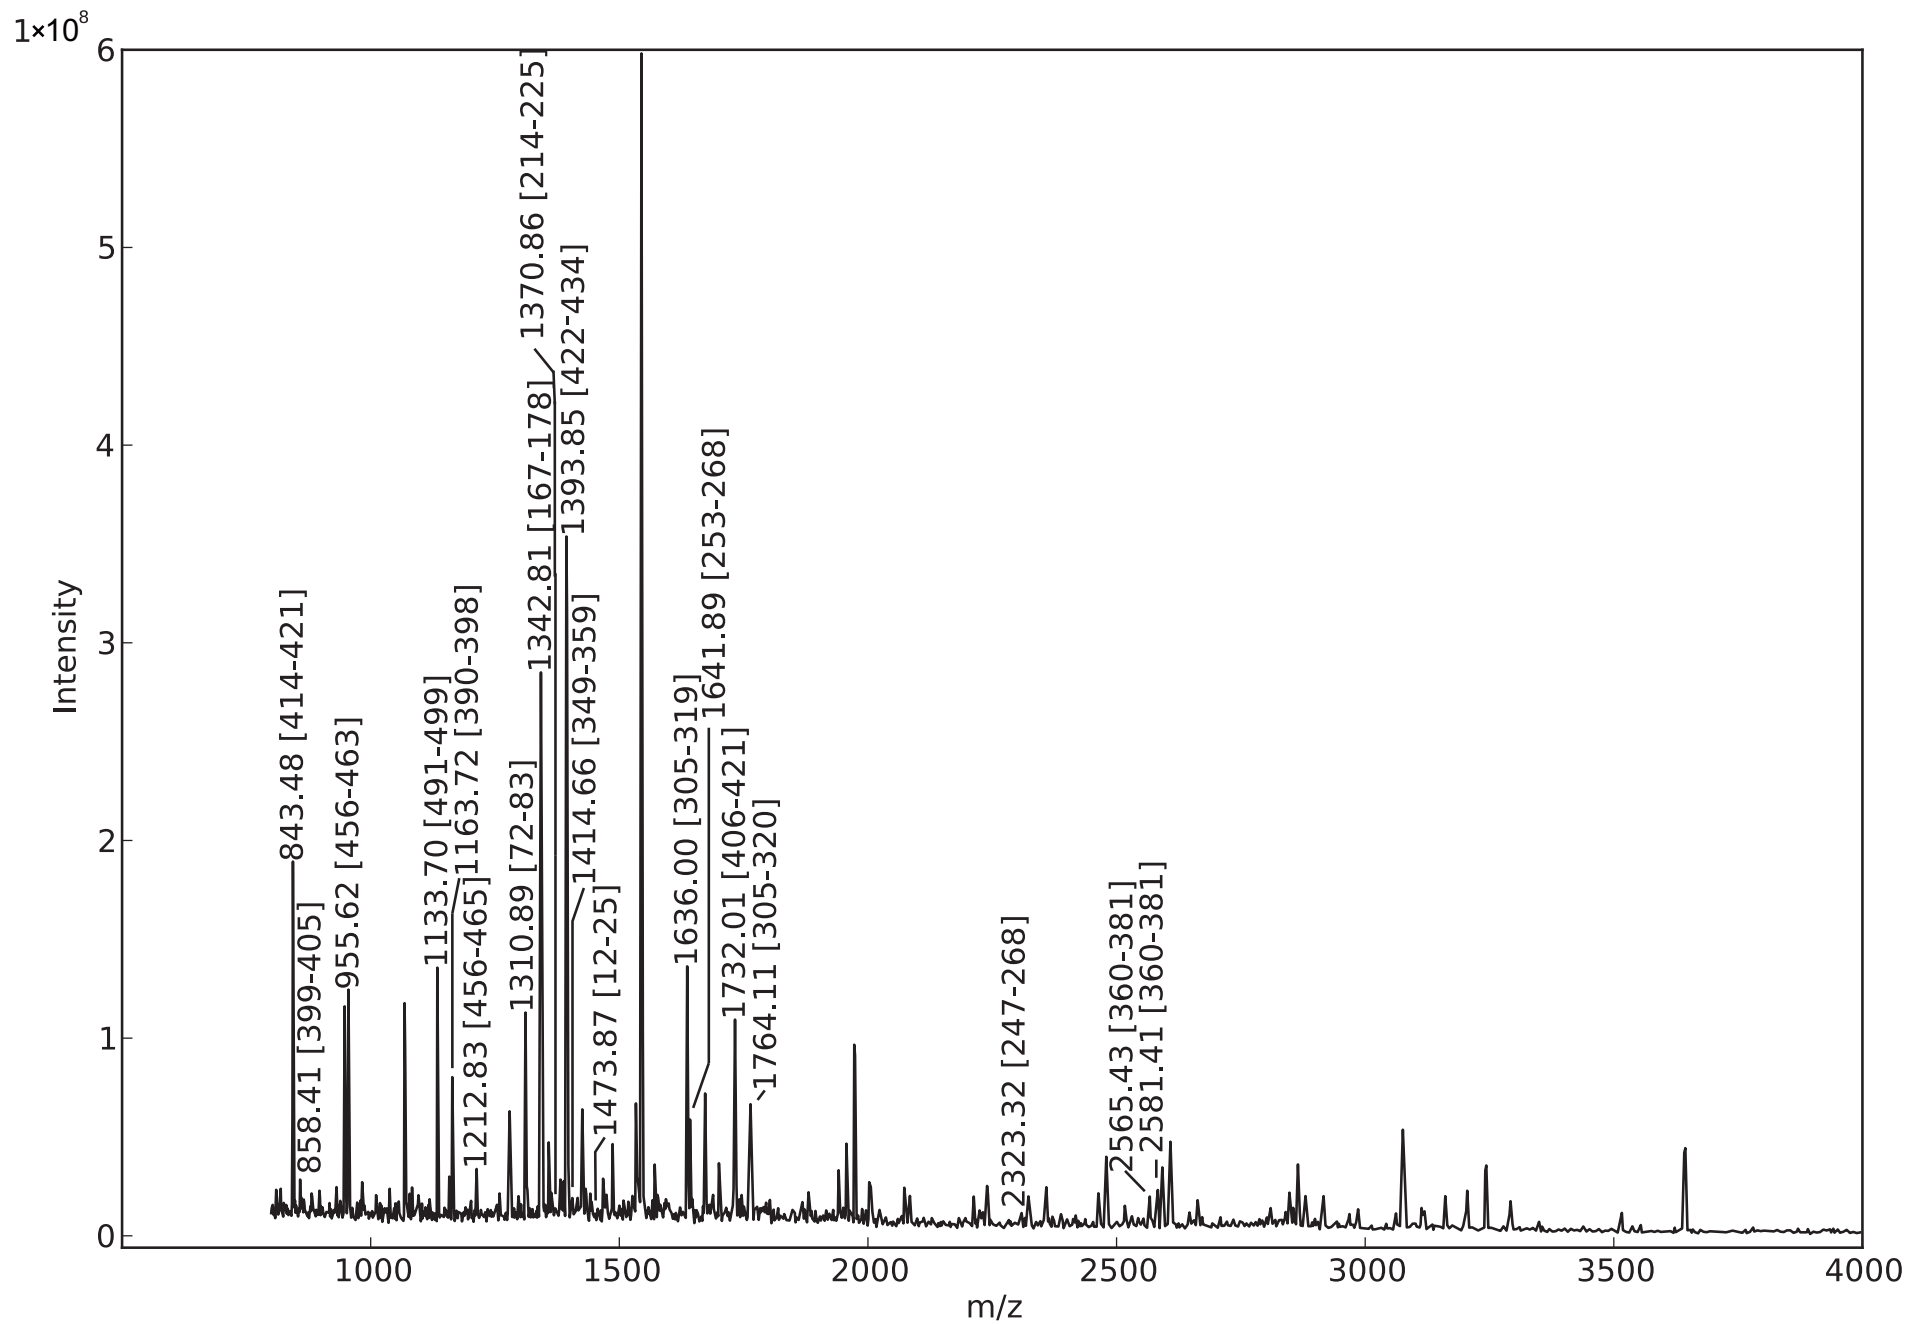

Spot No. 76

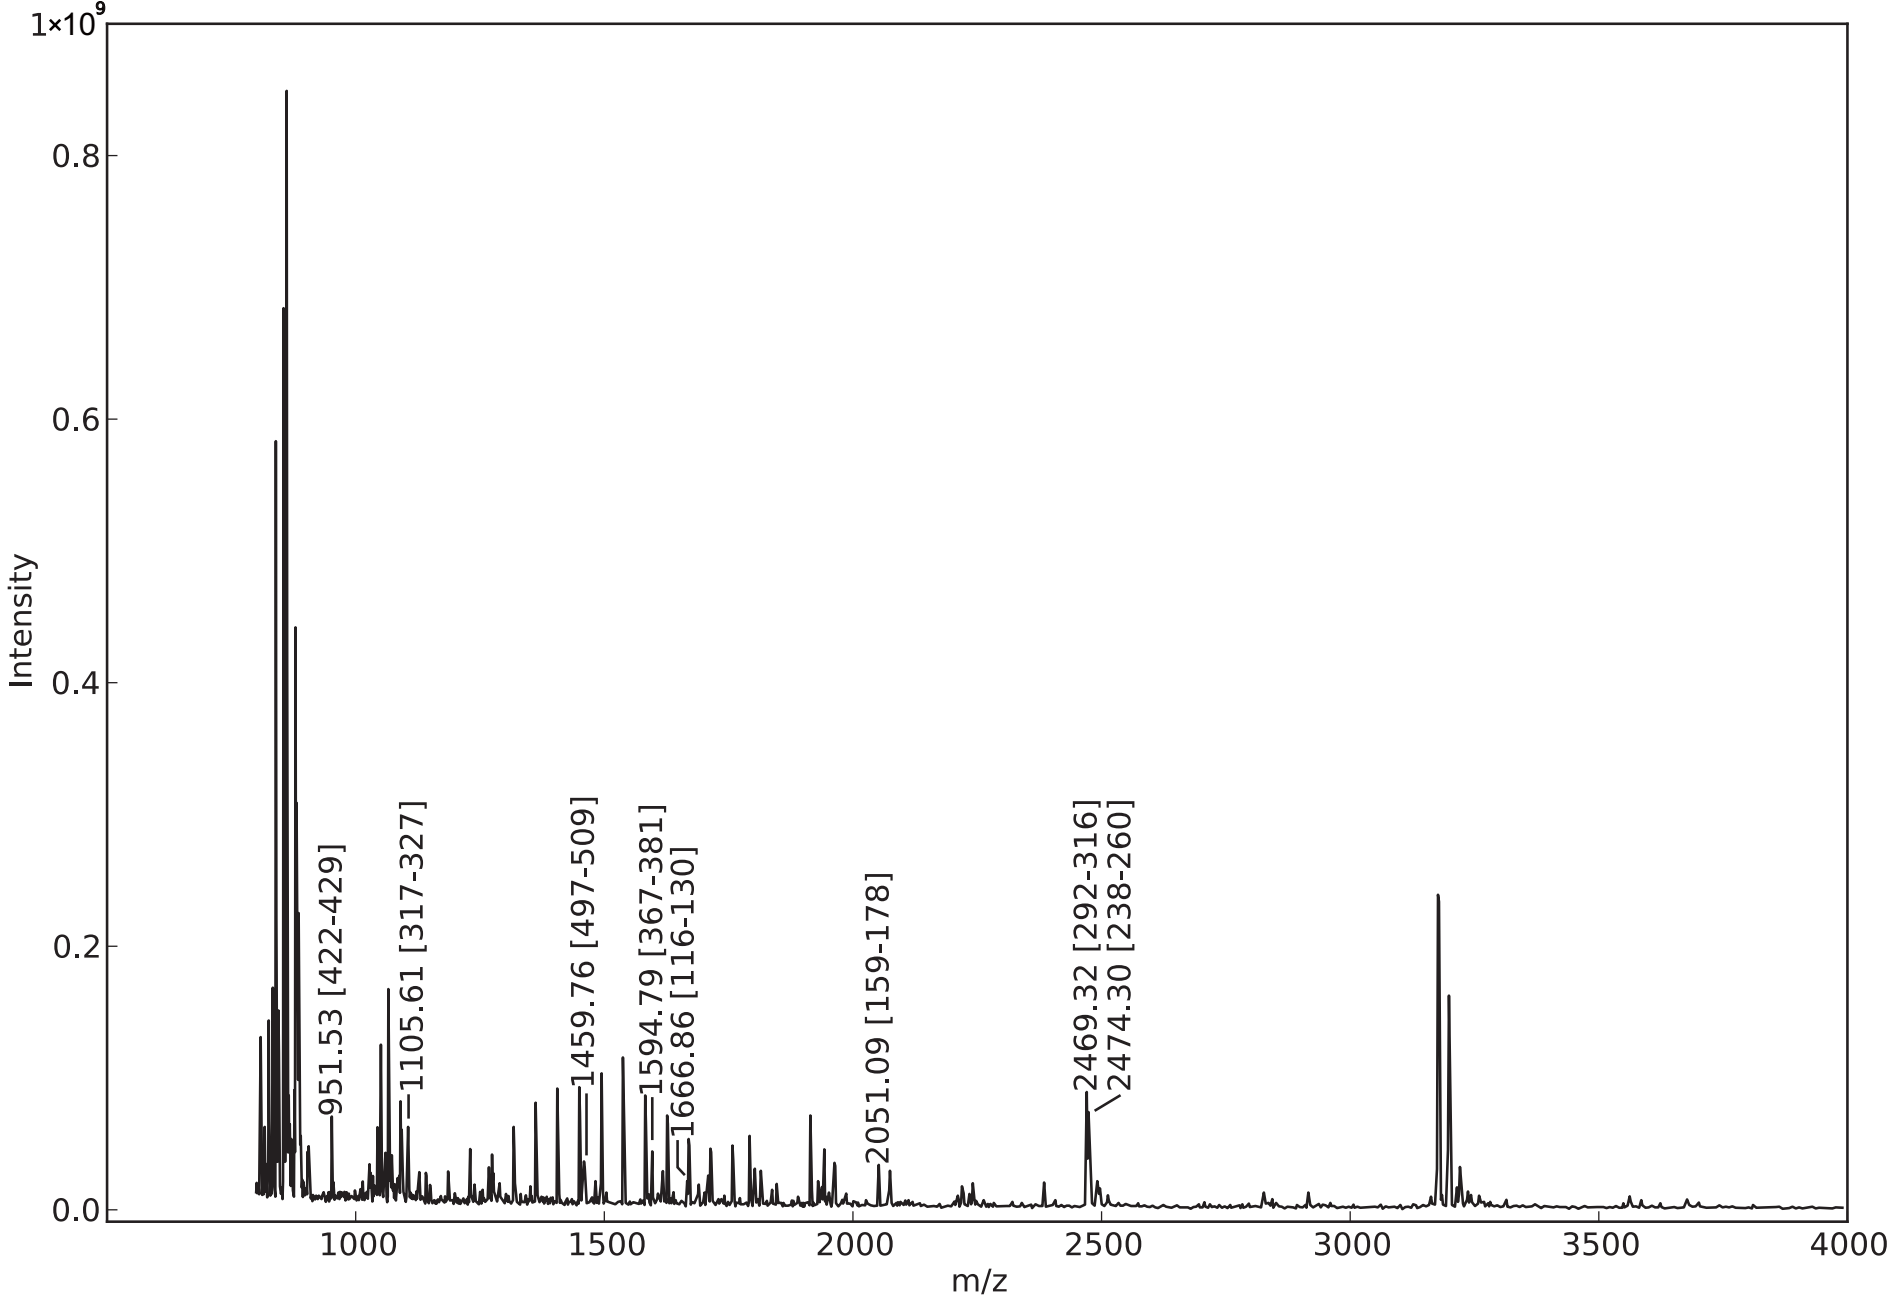

Spot No. 77

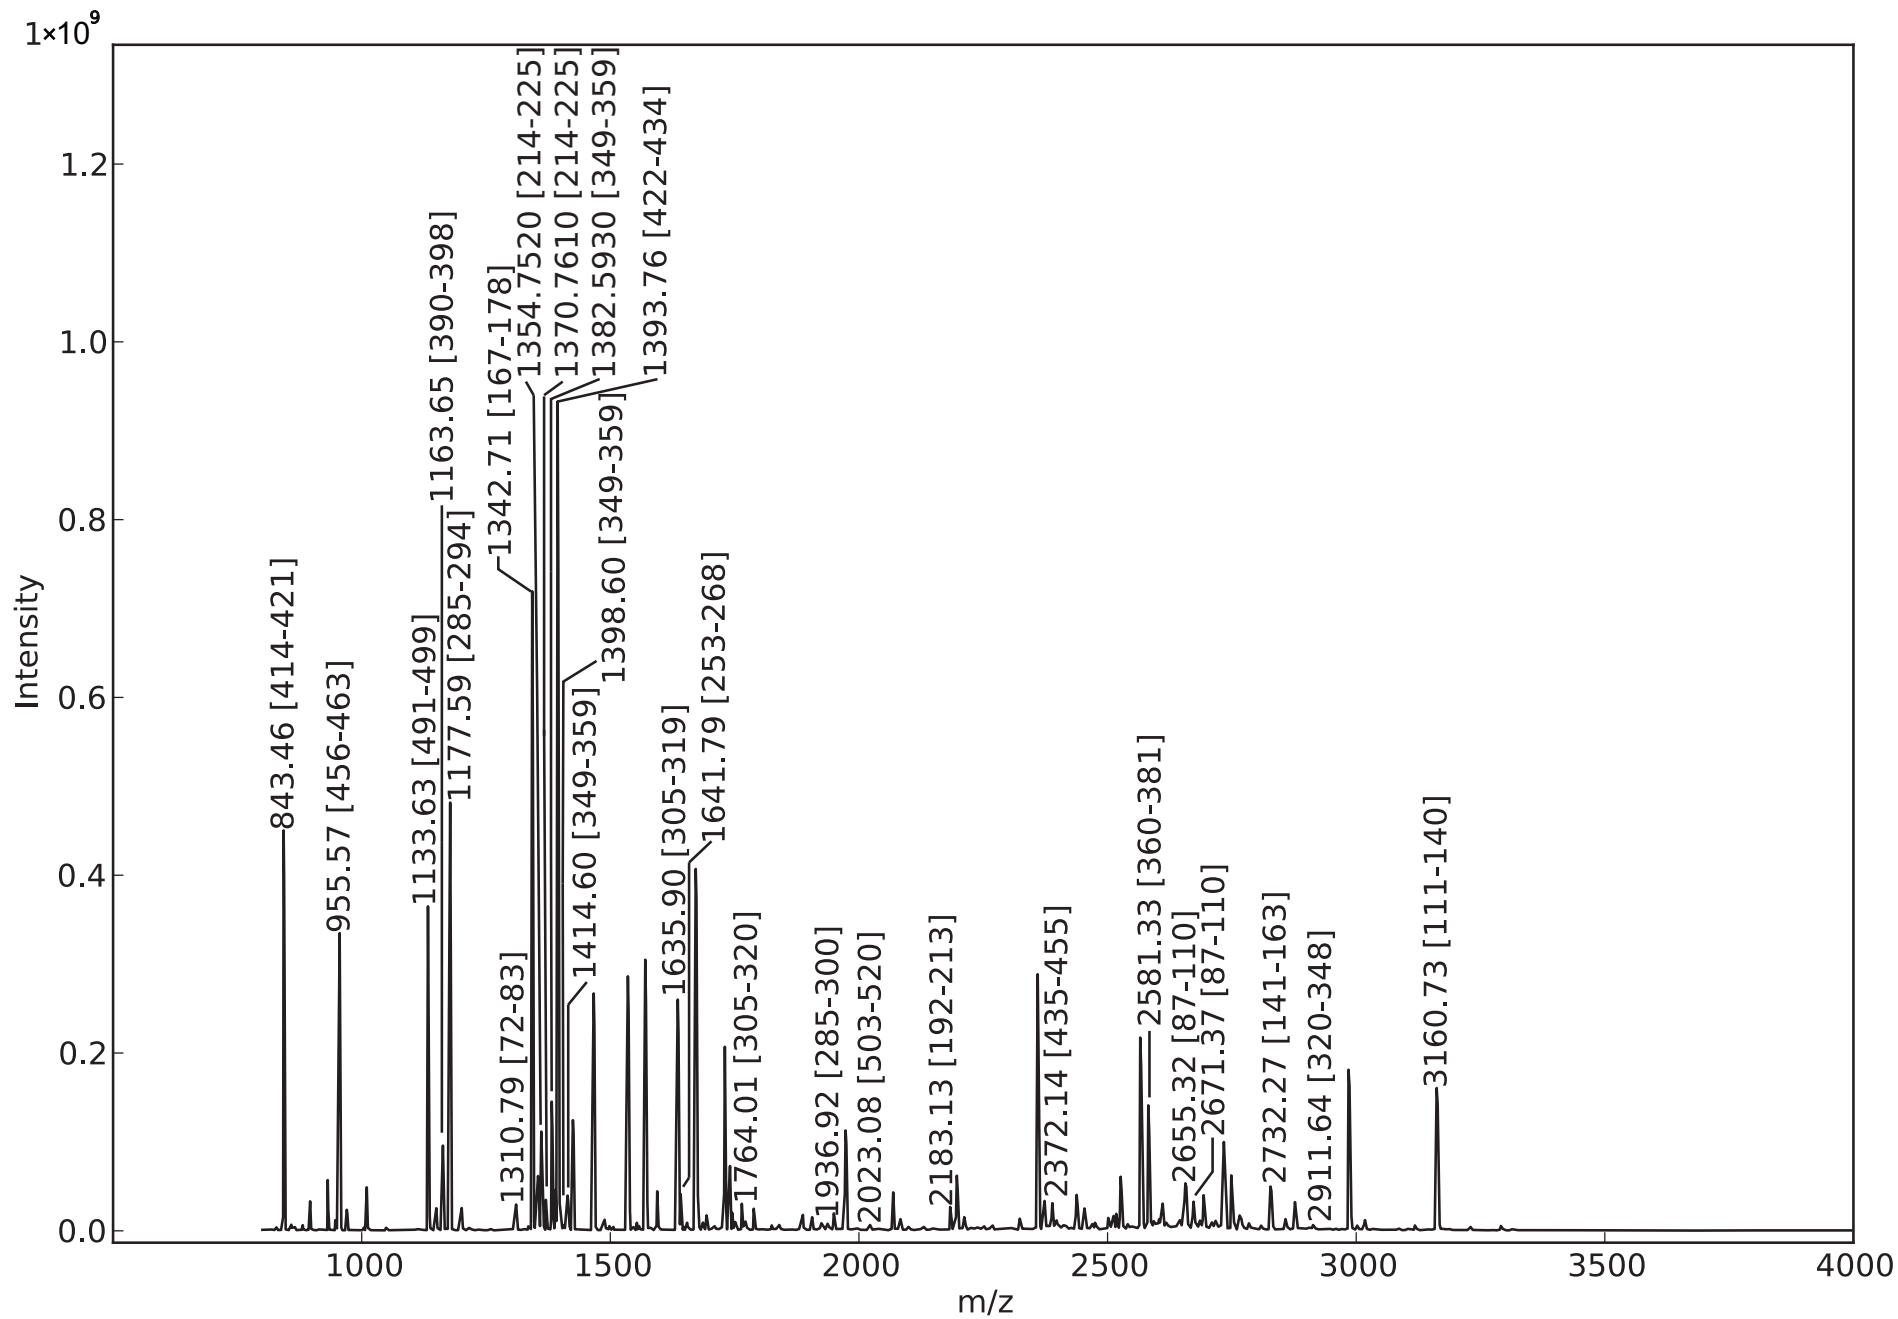

Spot No. 78

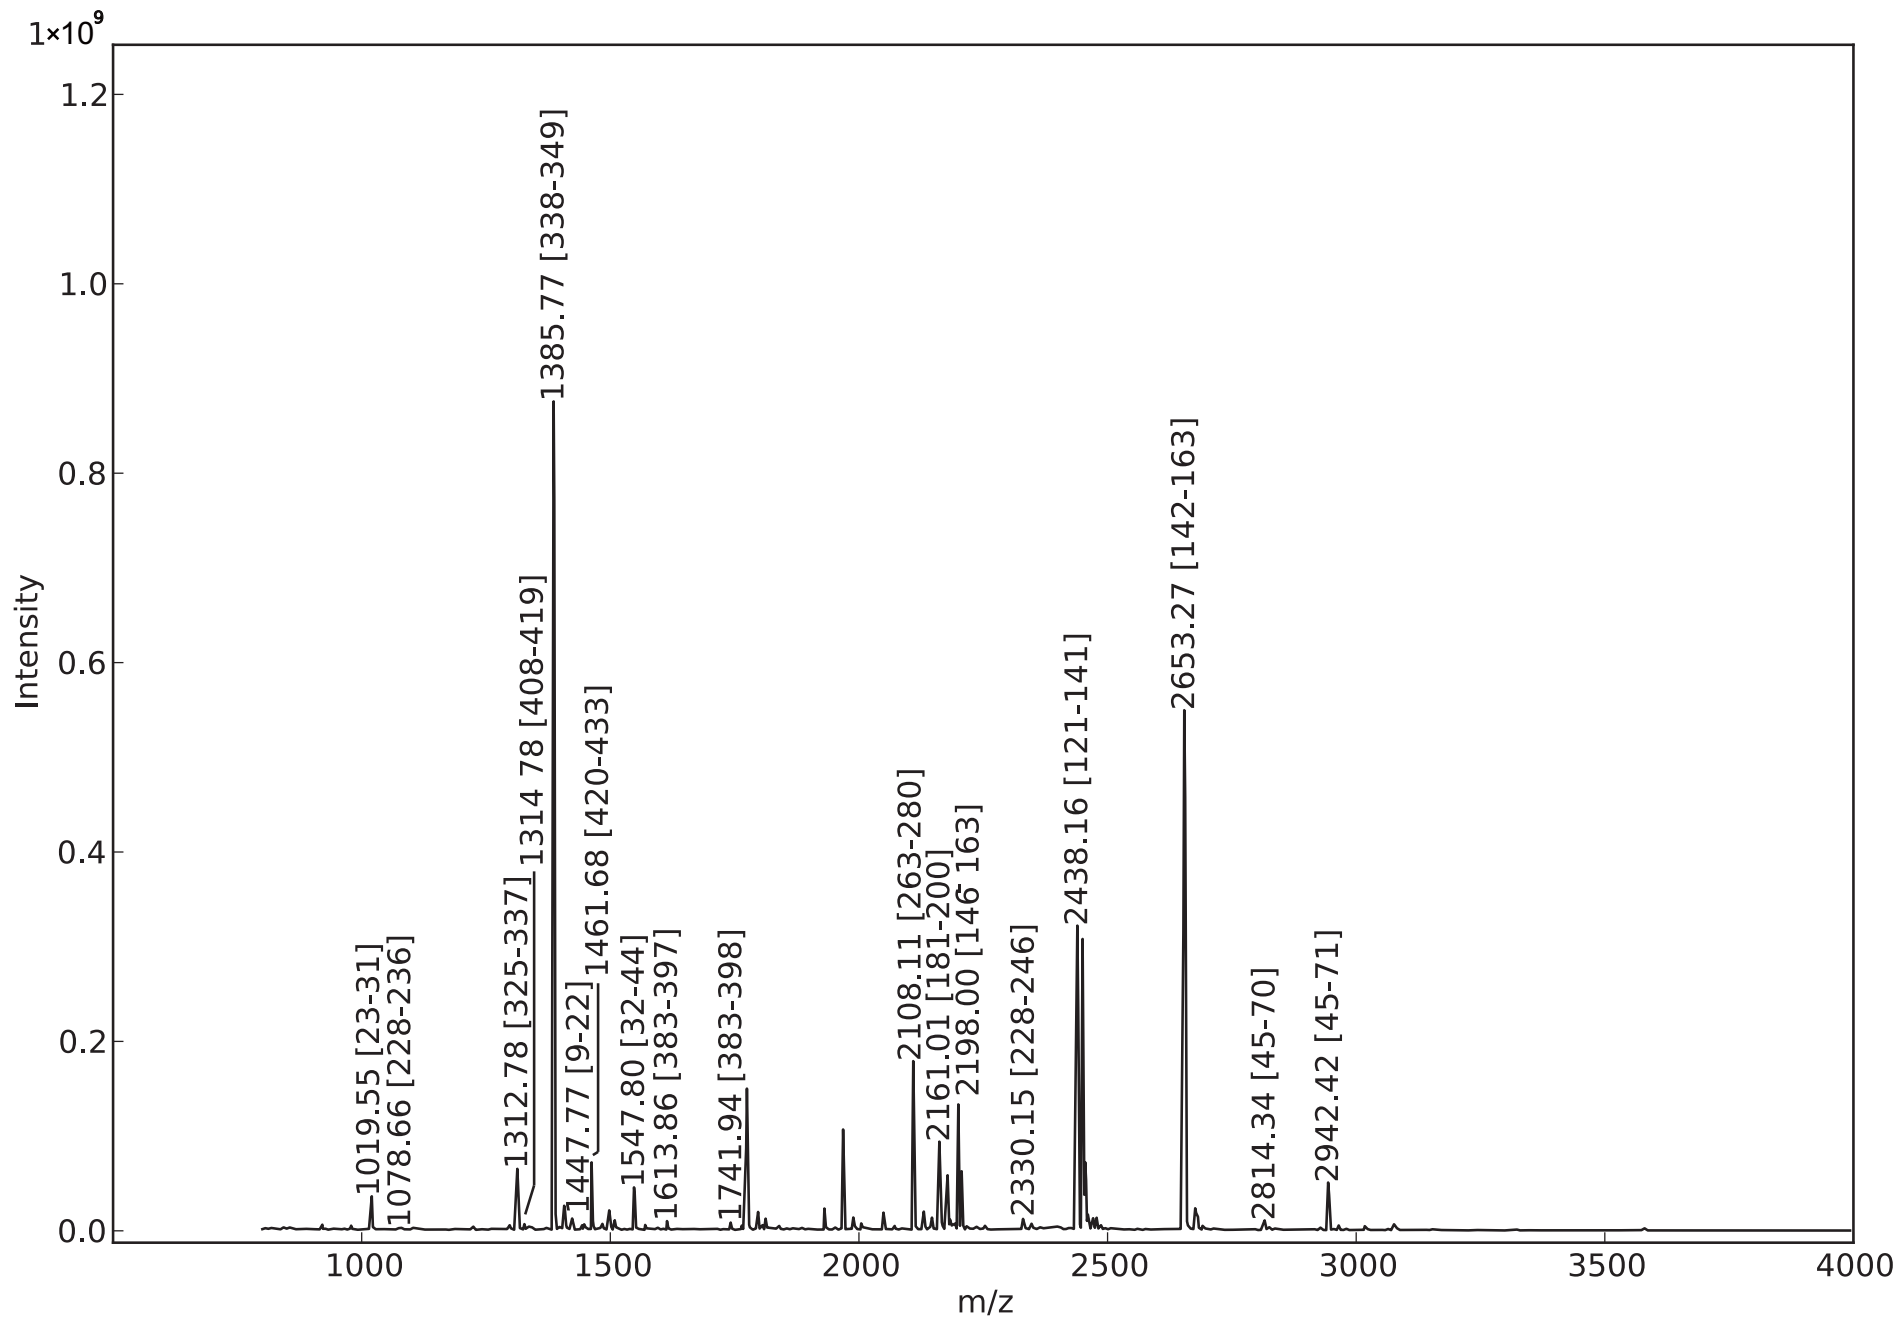



Spot No. 79

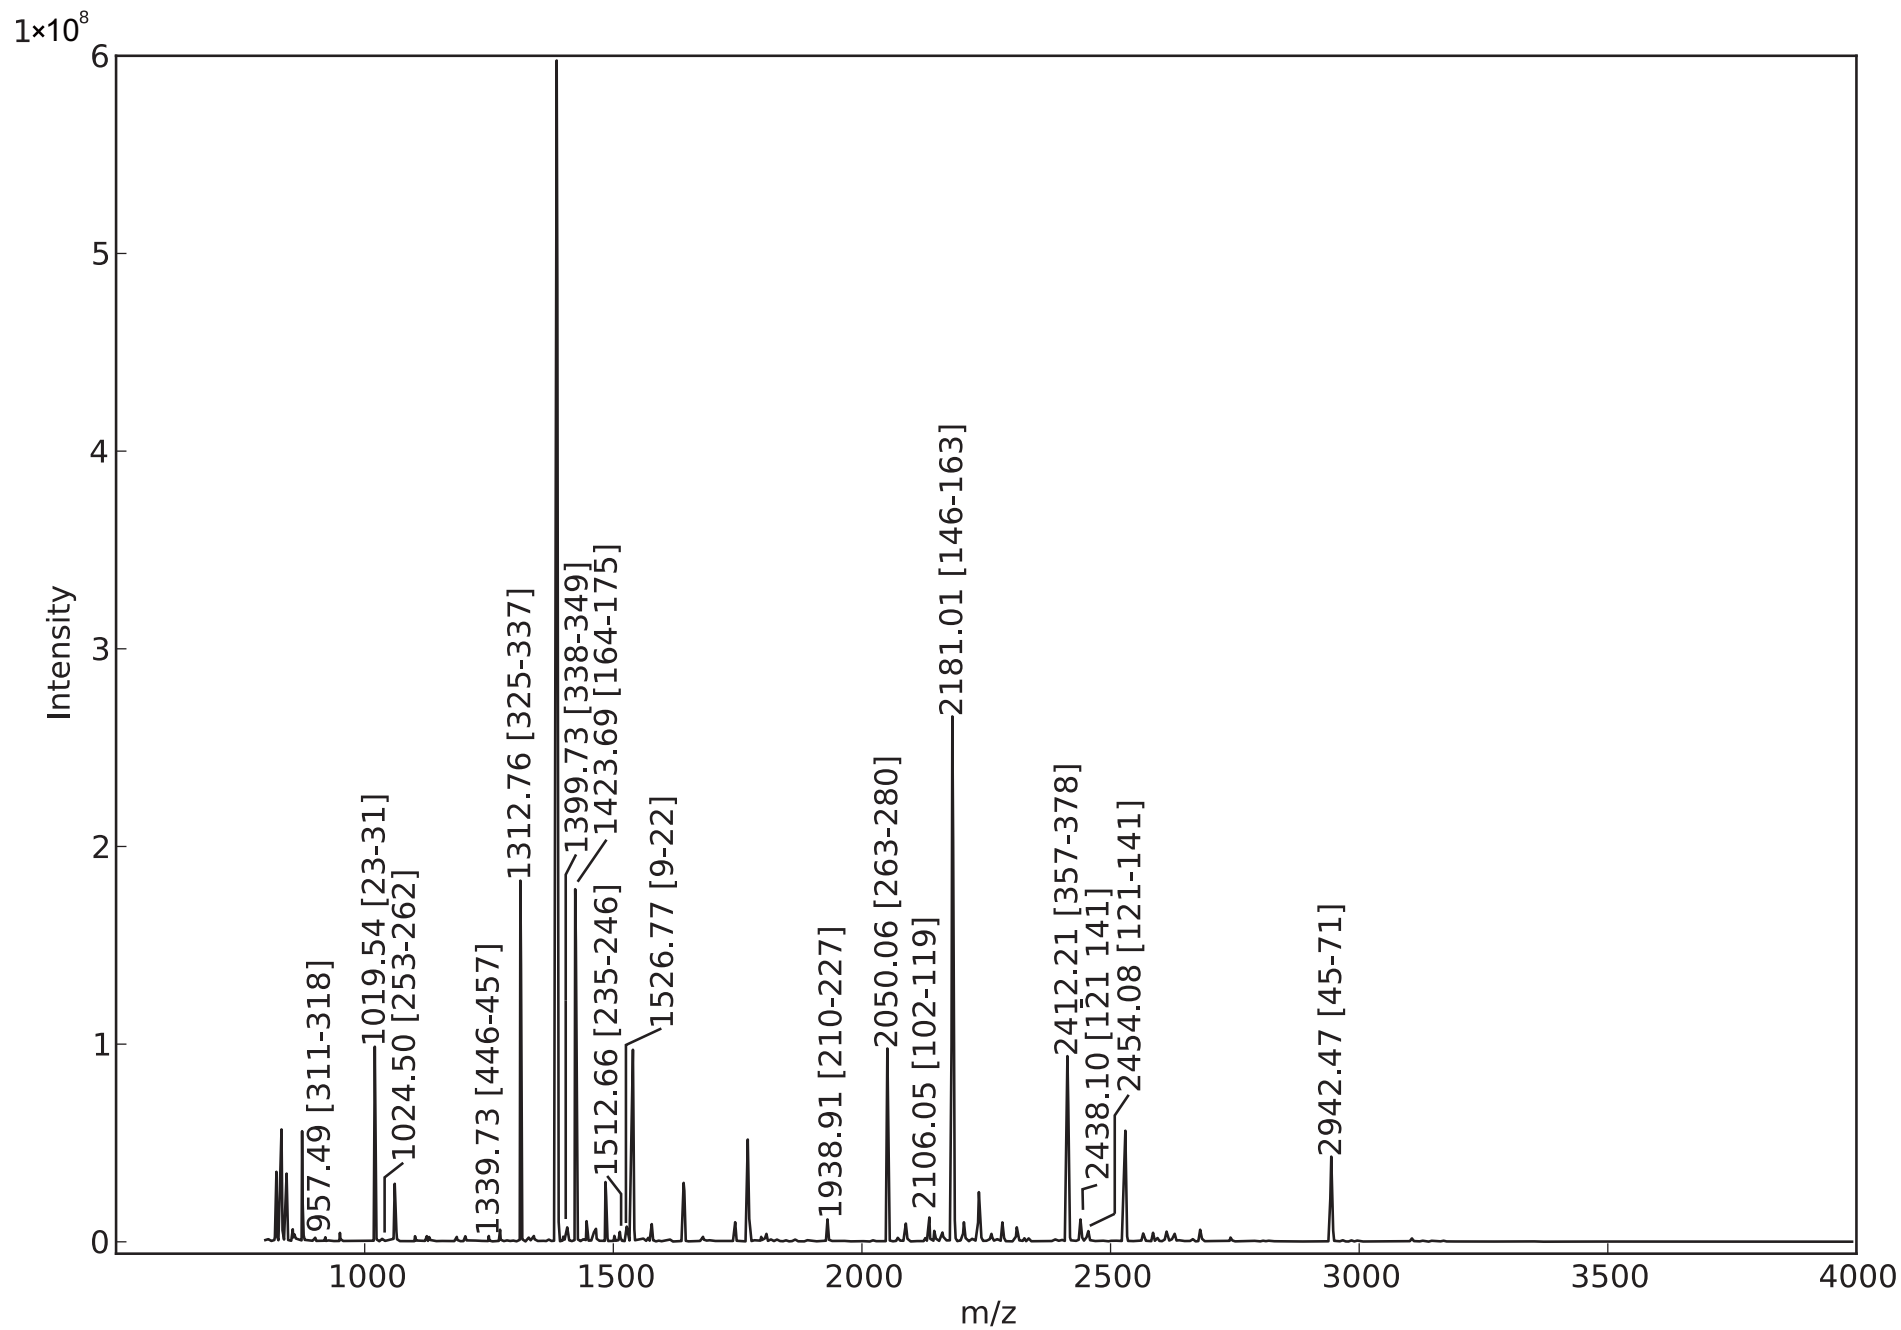

Spot No. 80

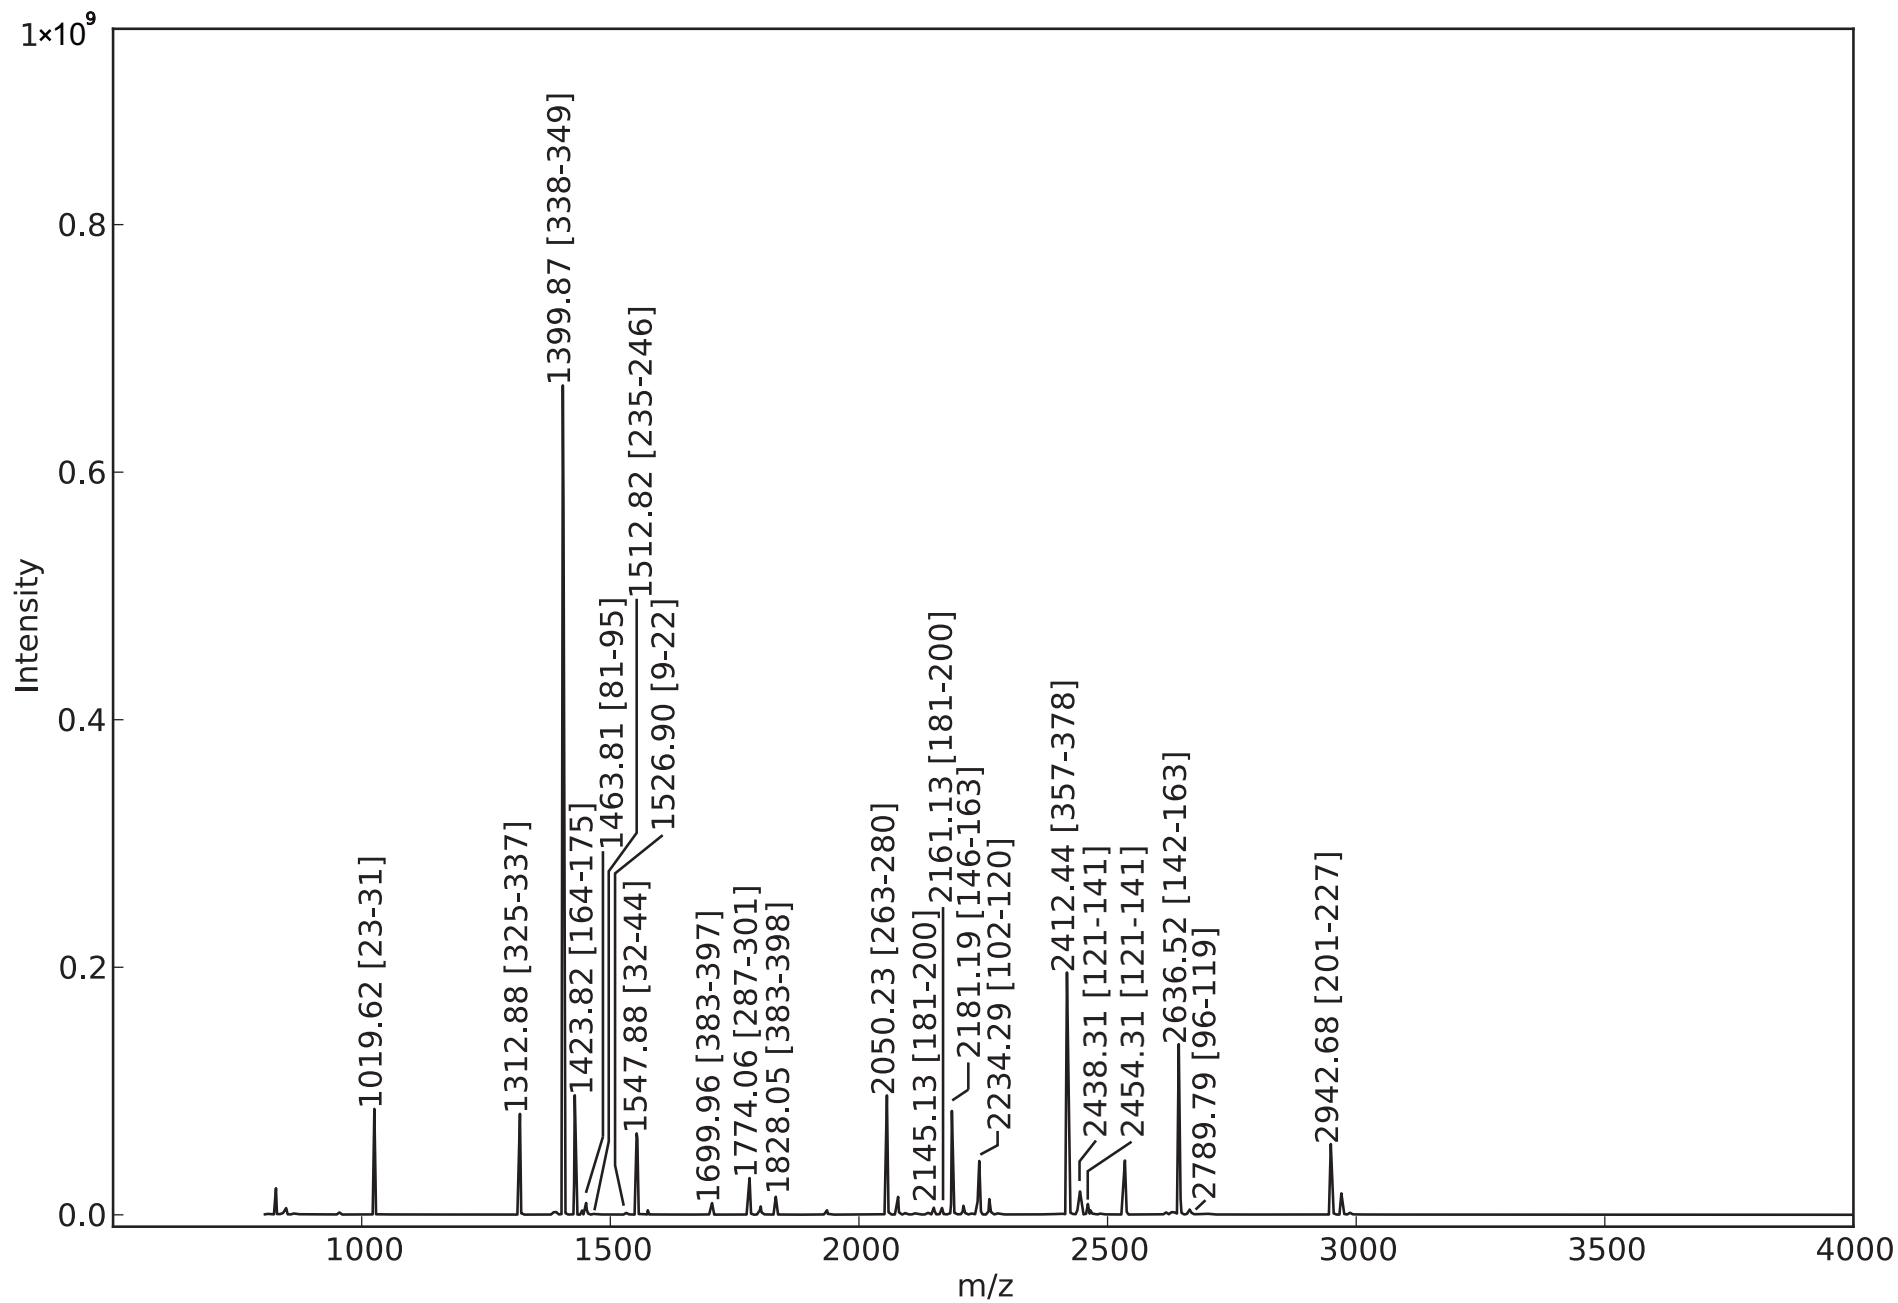

Spot No. 81

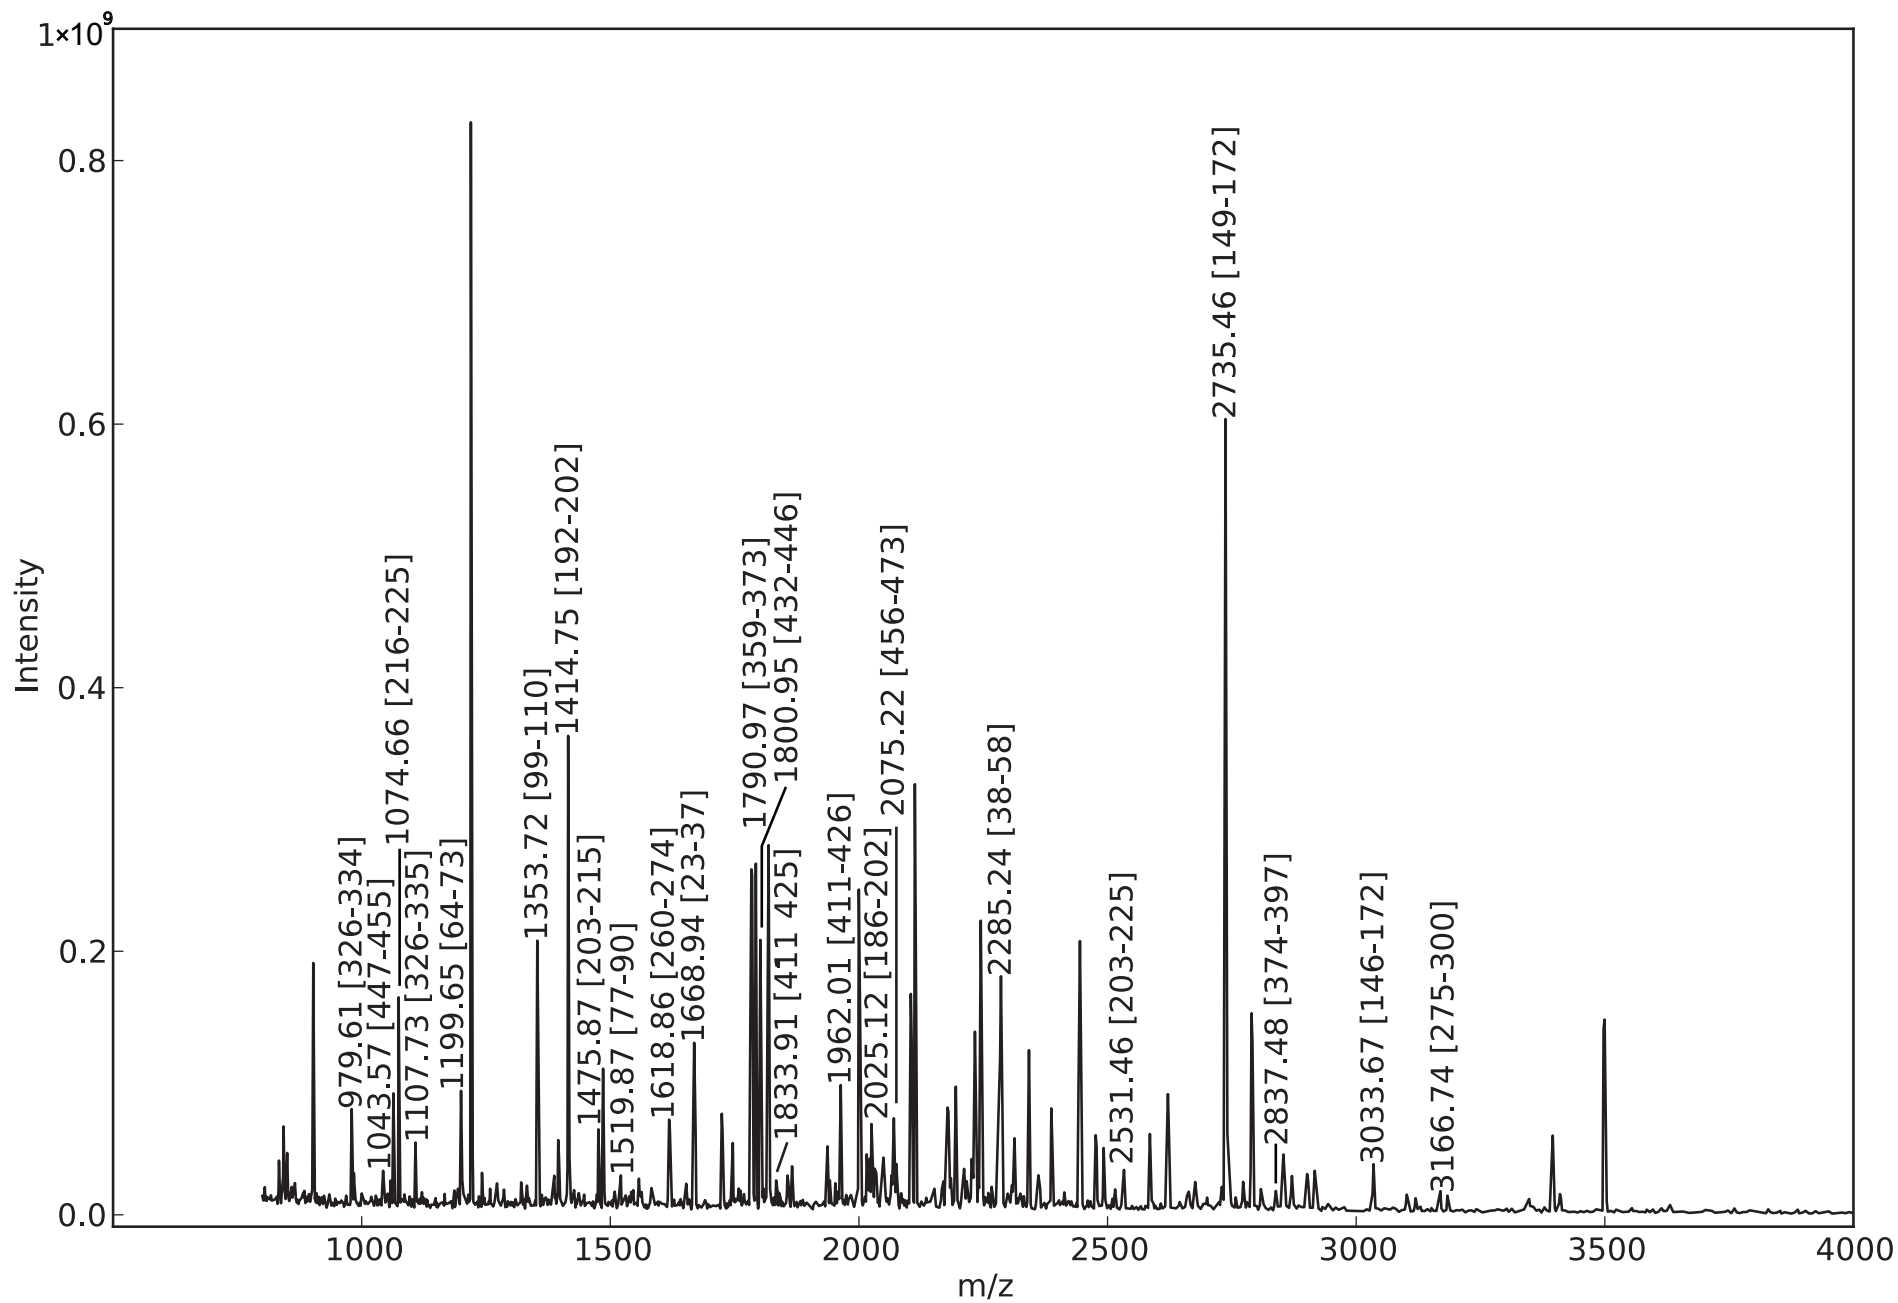

Spot No. 82

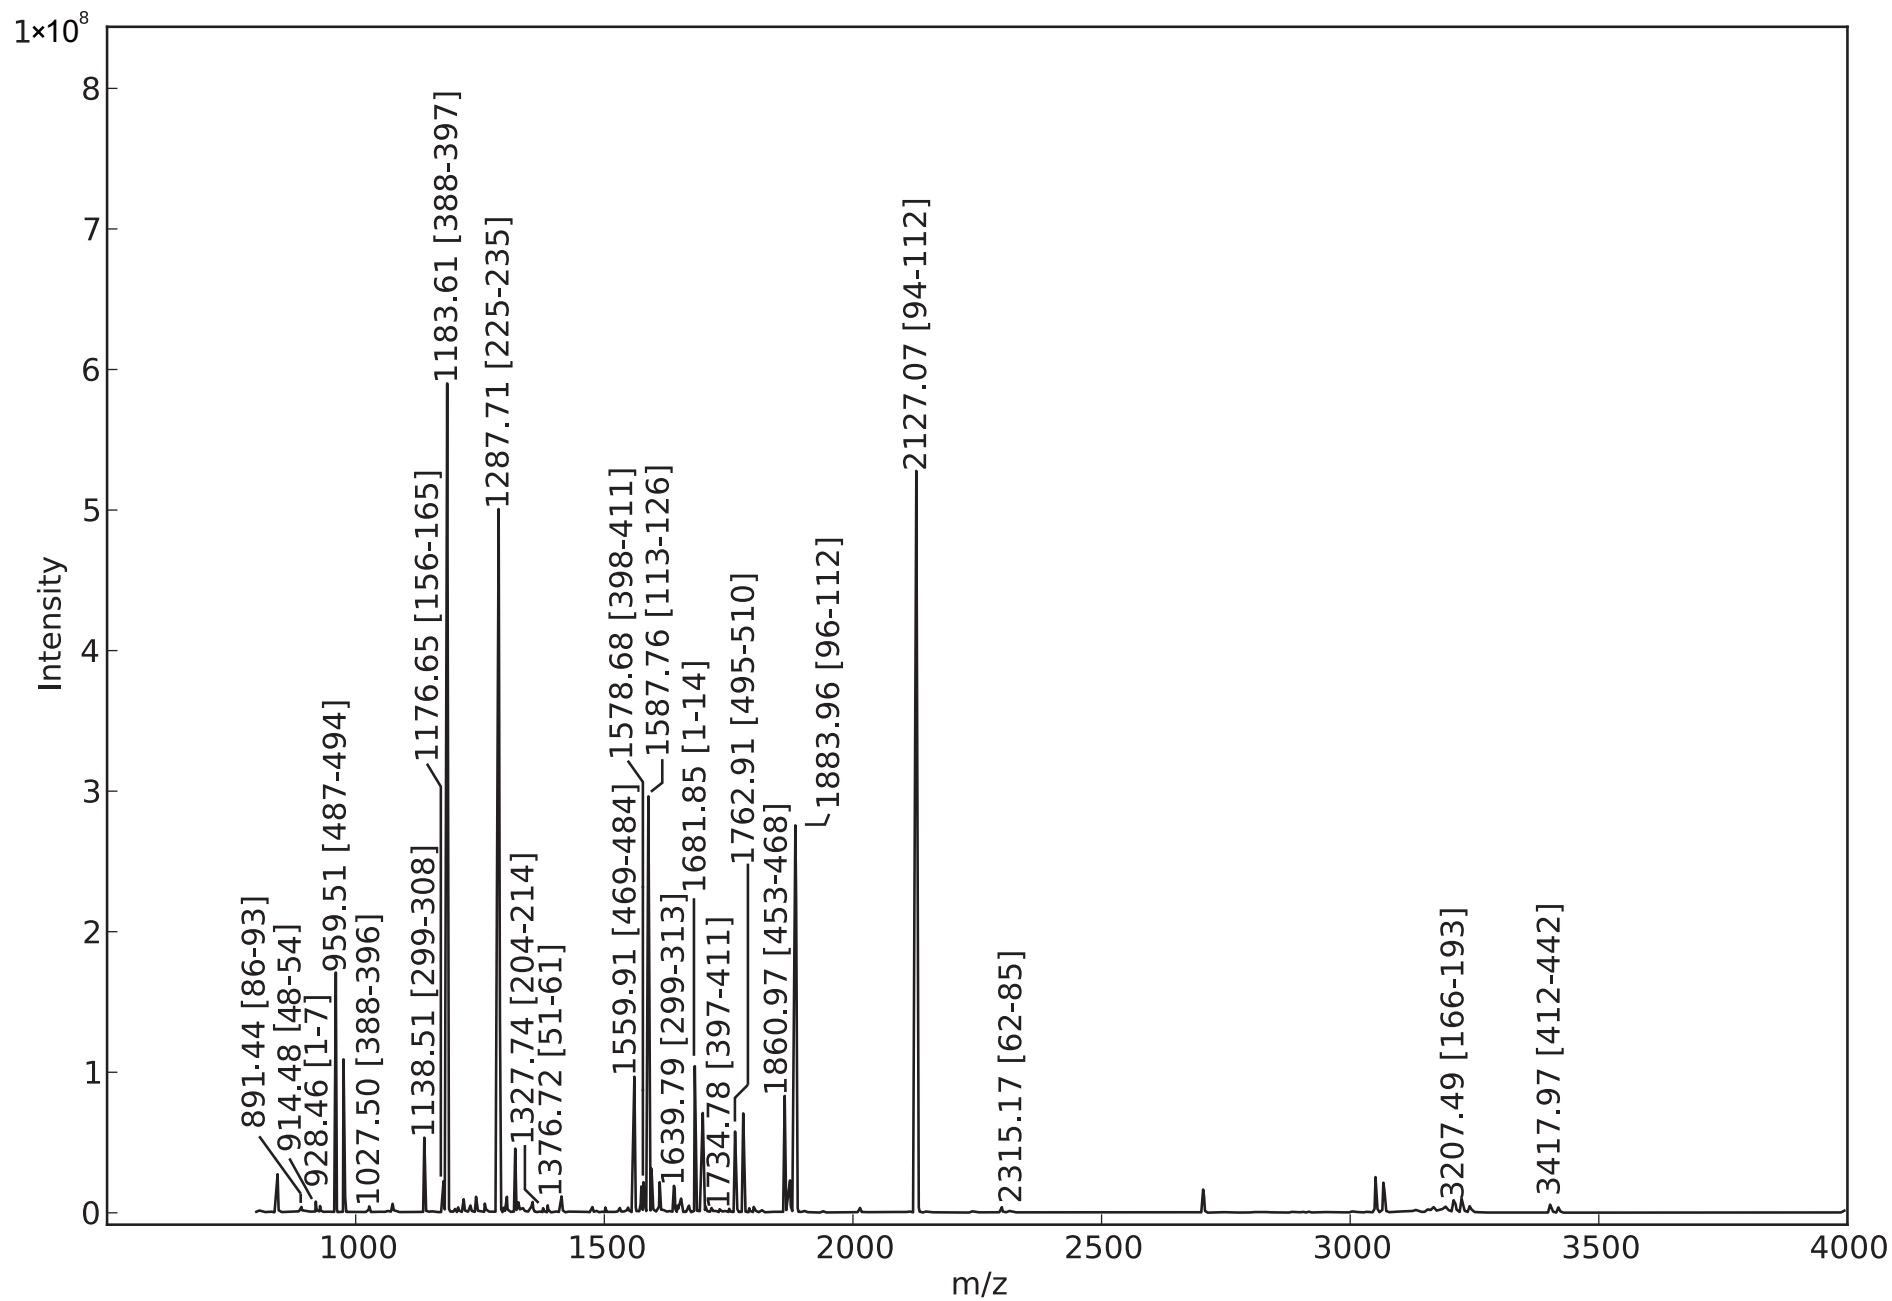

Spot No. 83

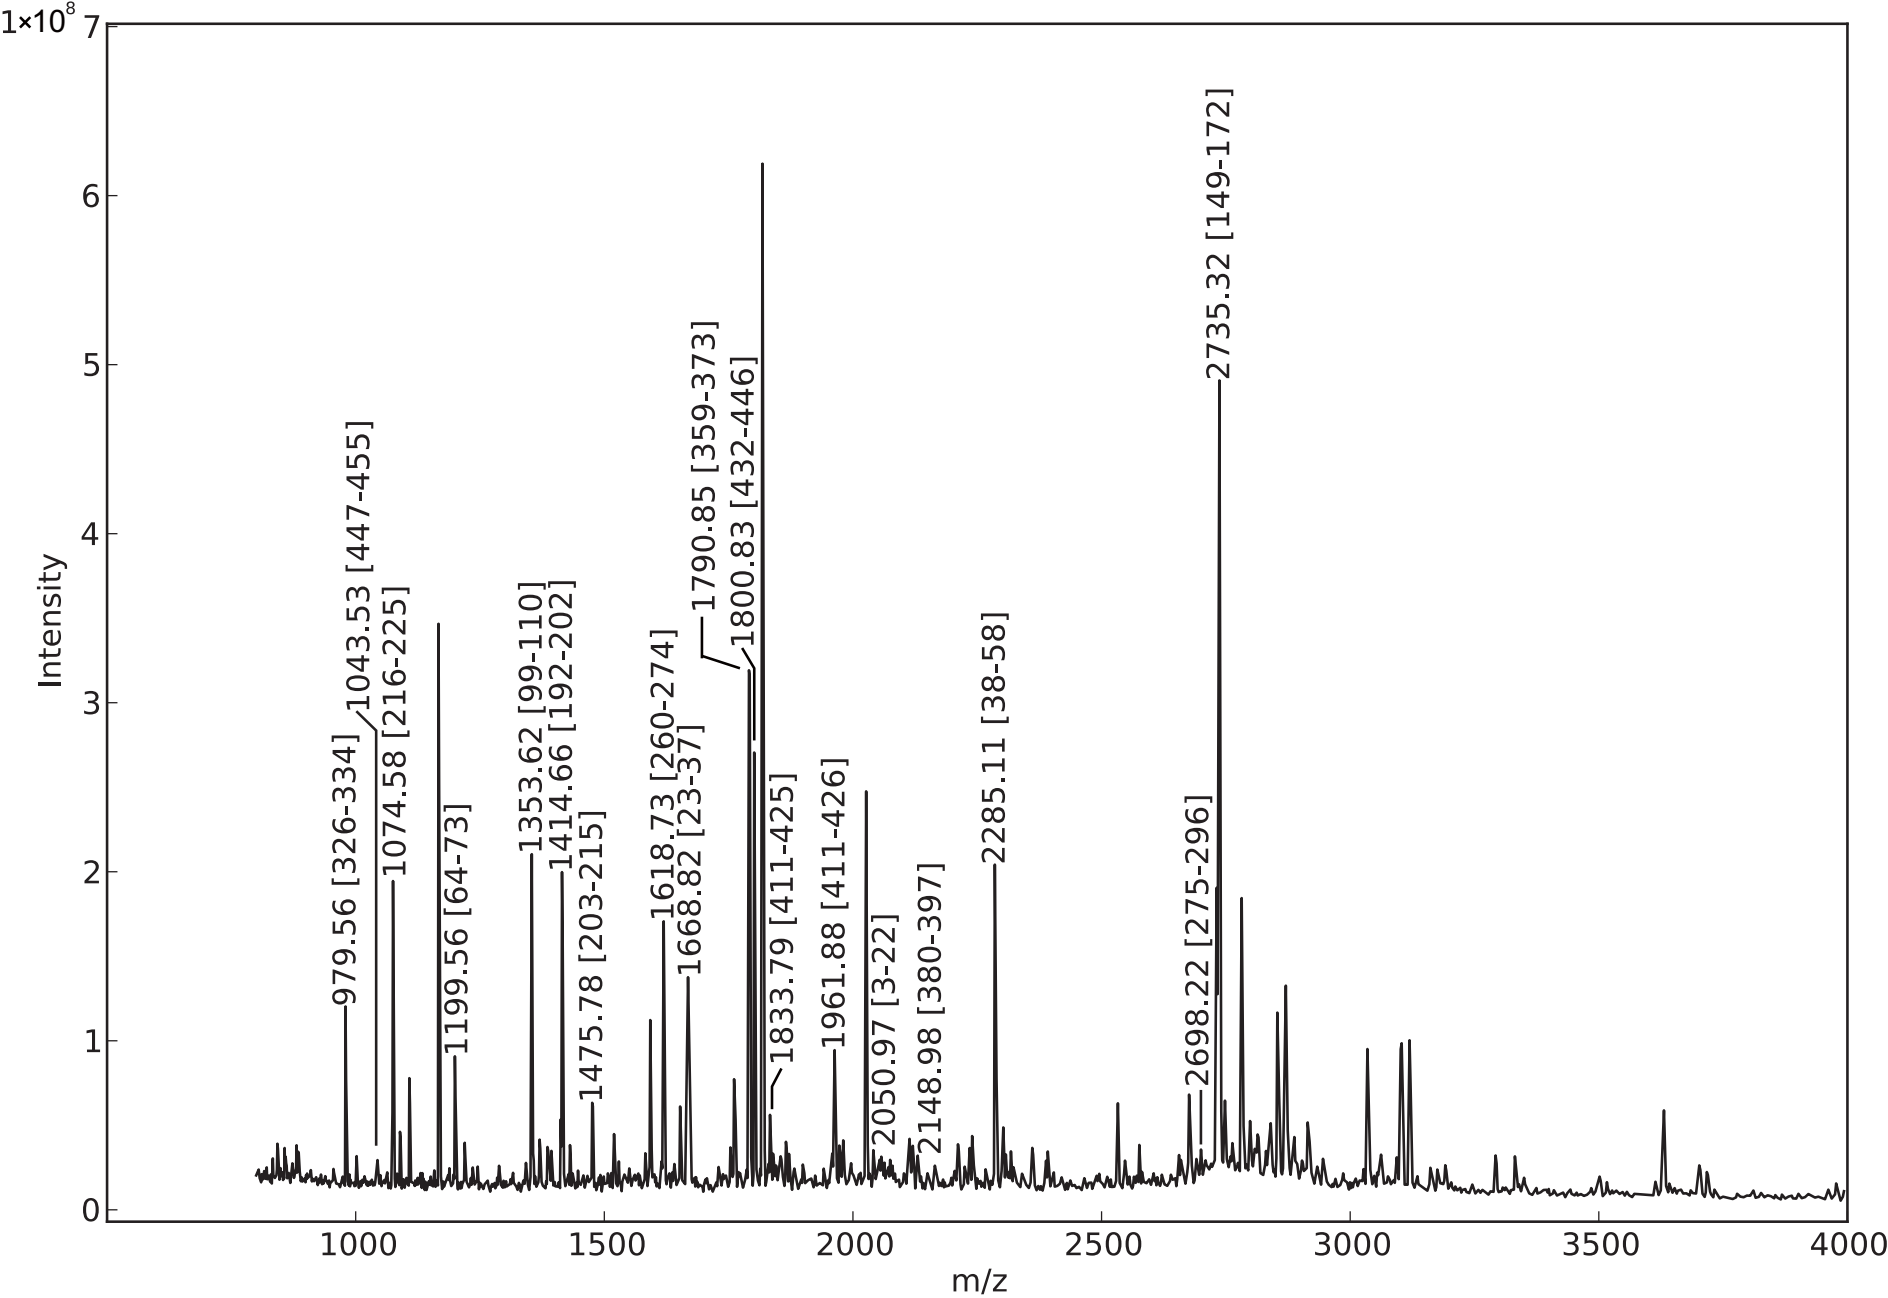

Spot No. 84

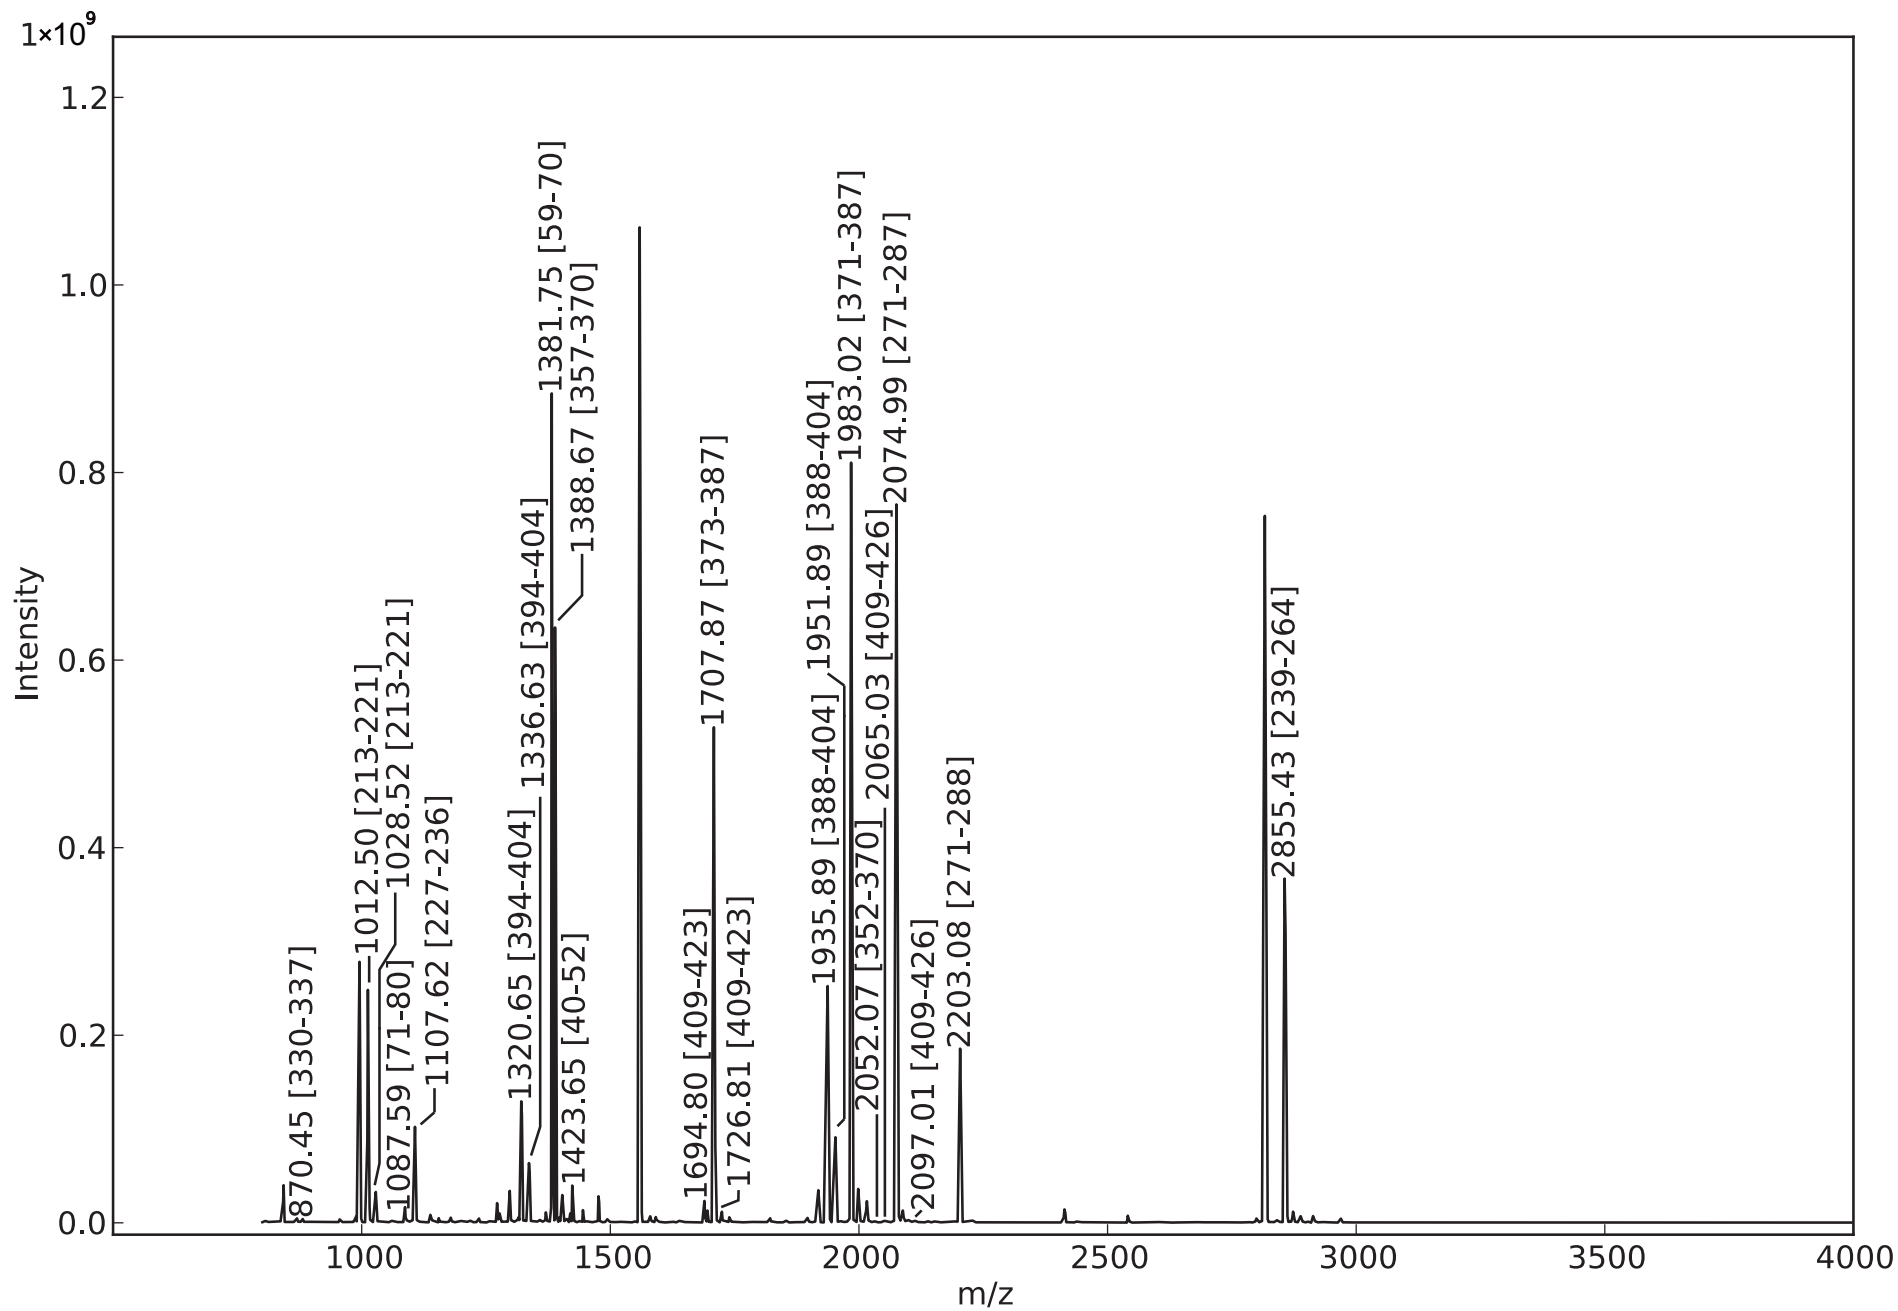

Spot No. 85

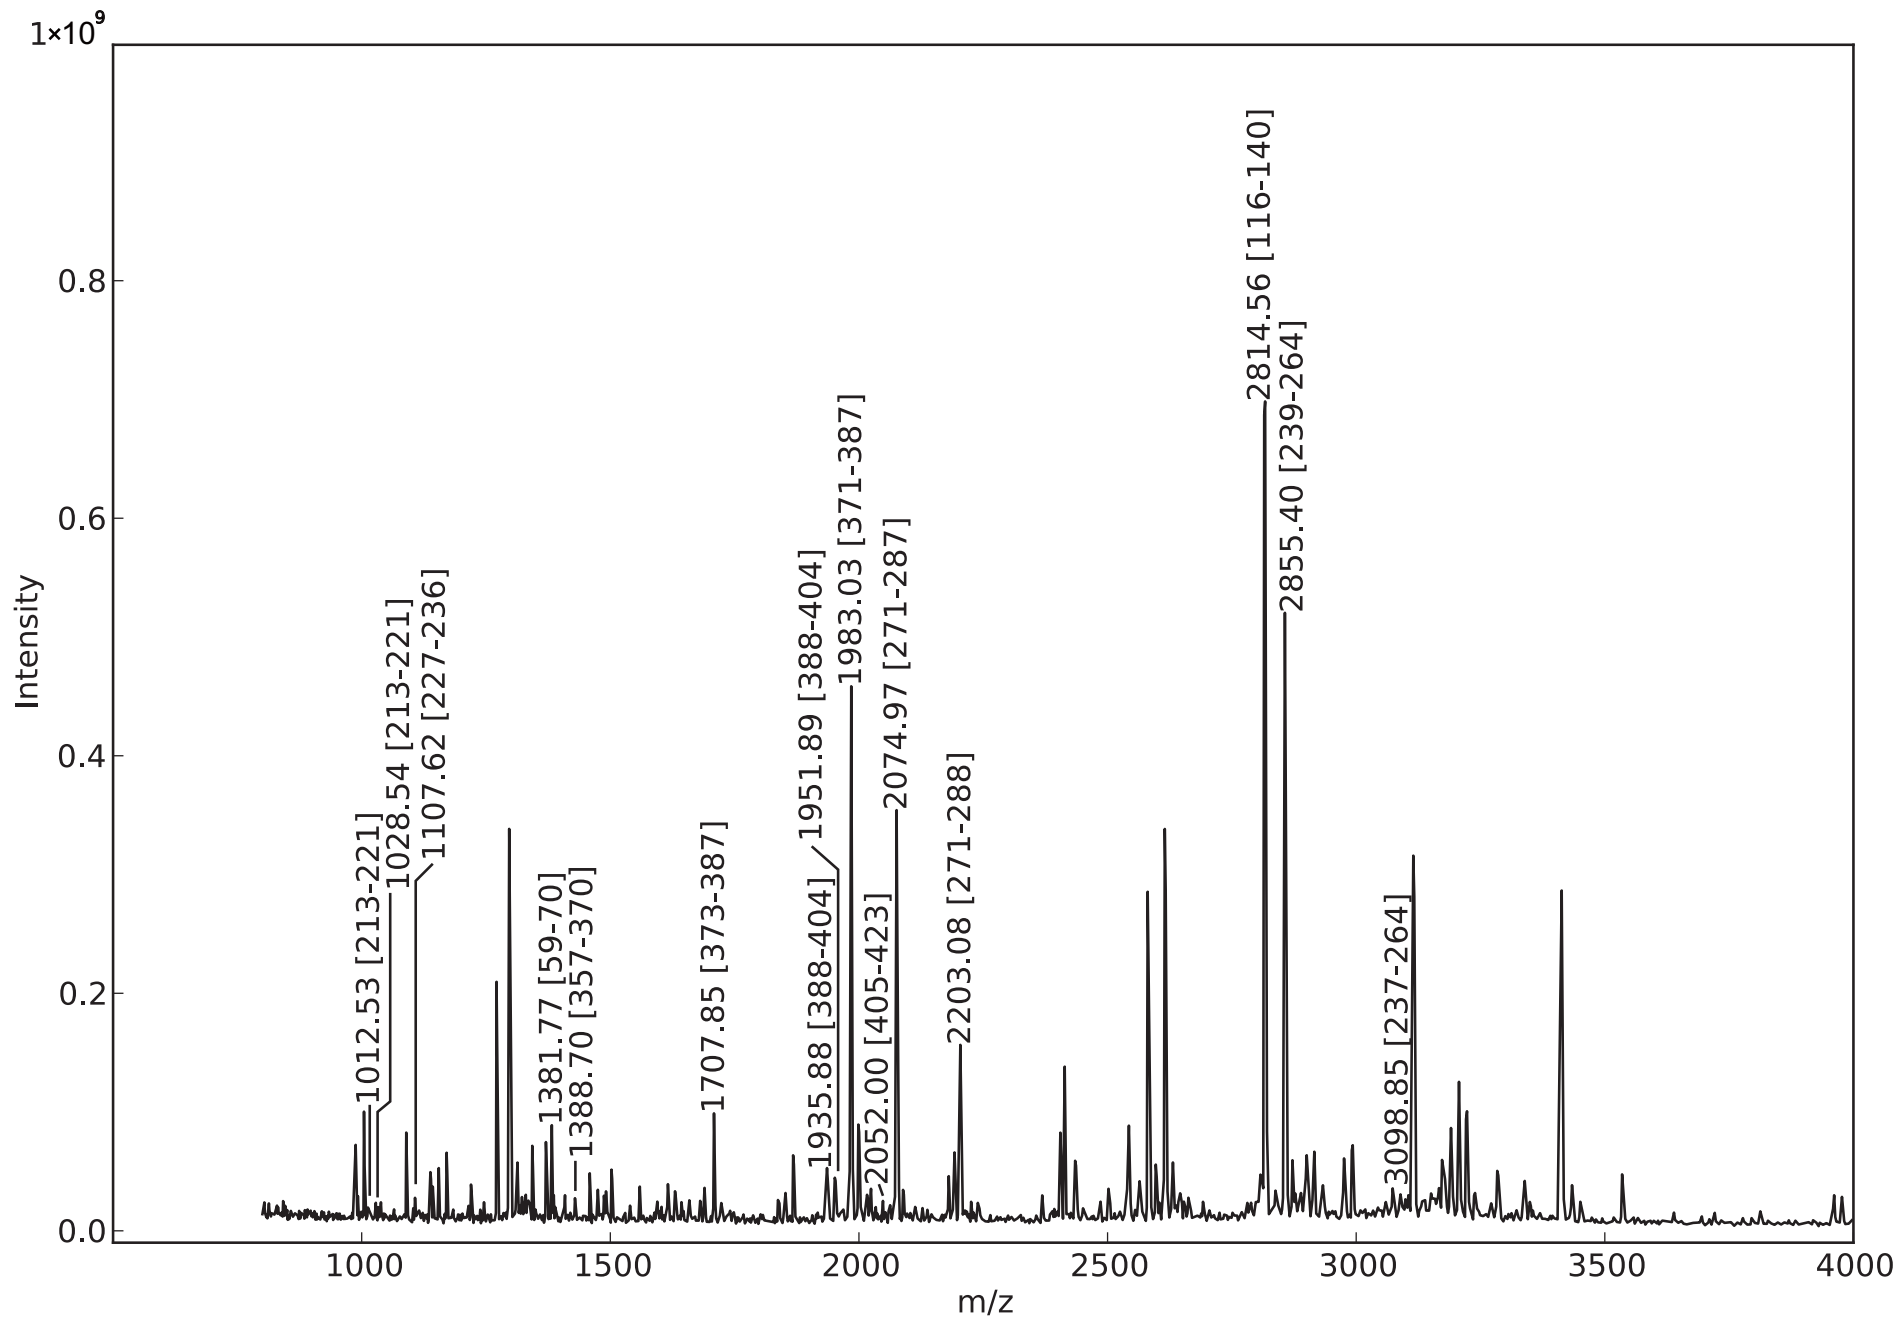

Spot No. 86

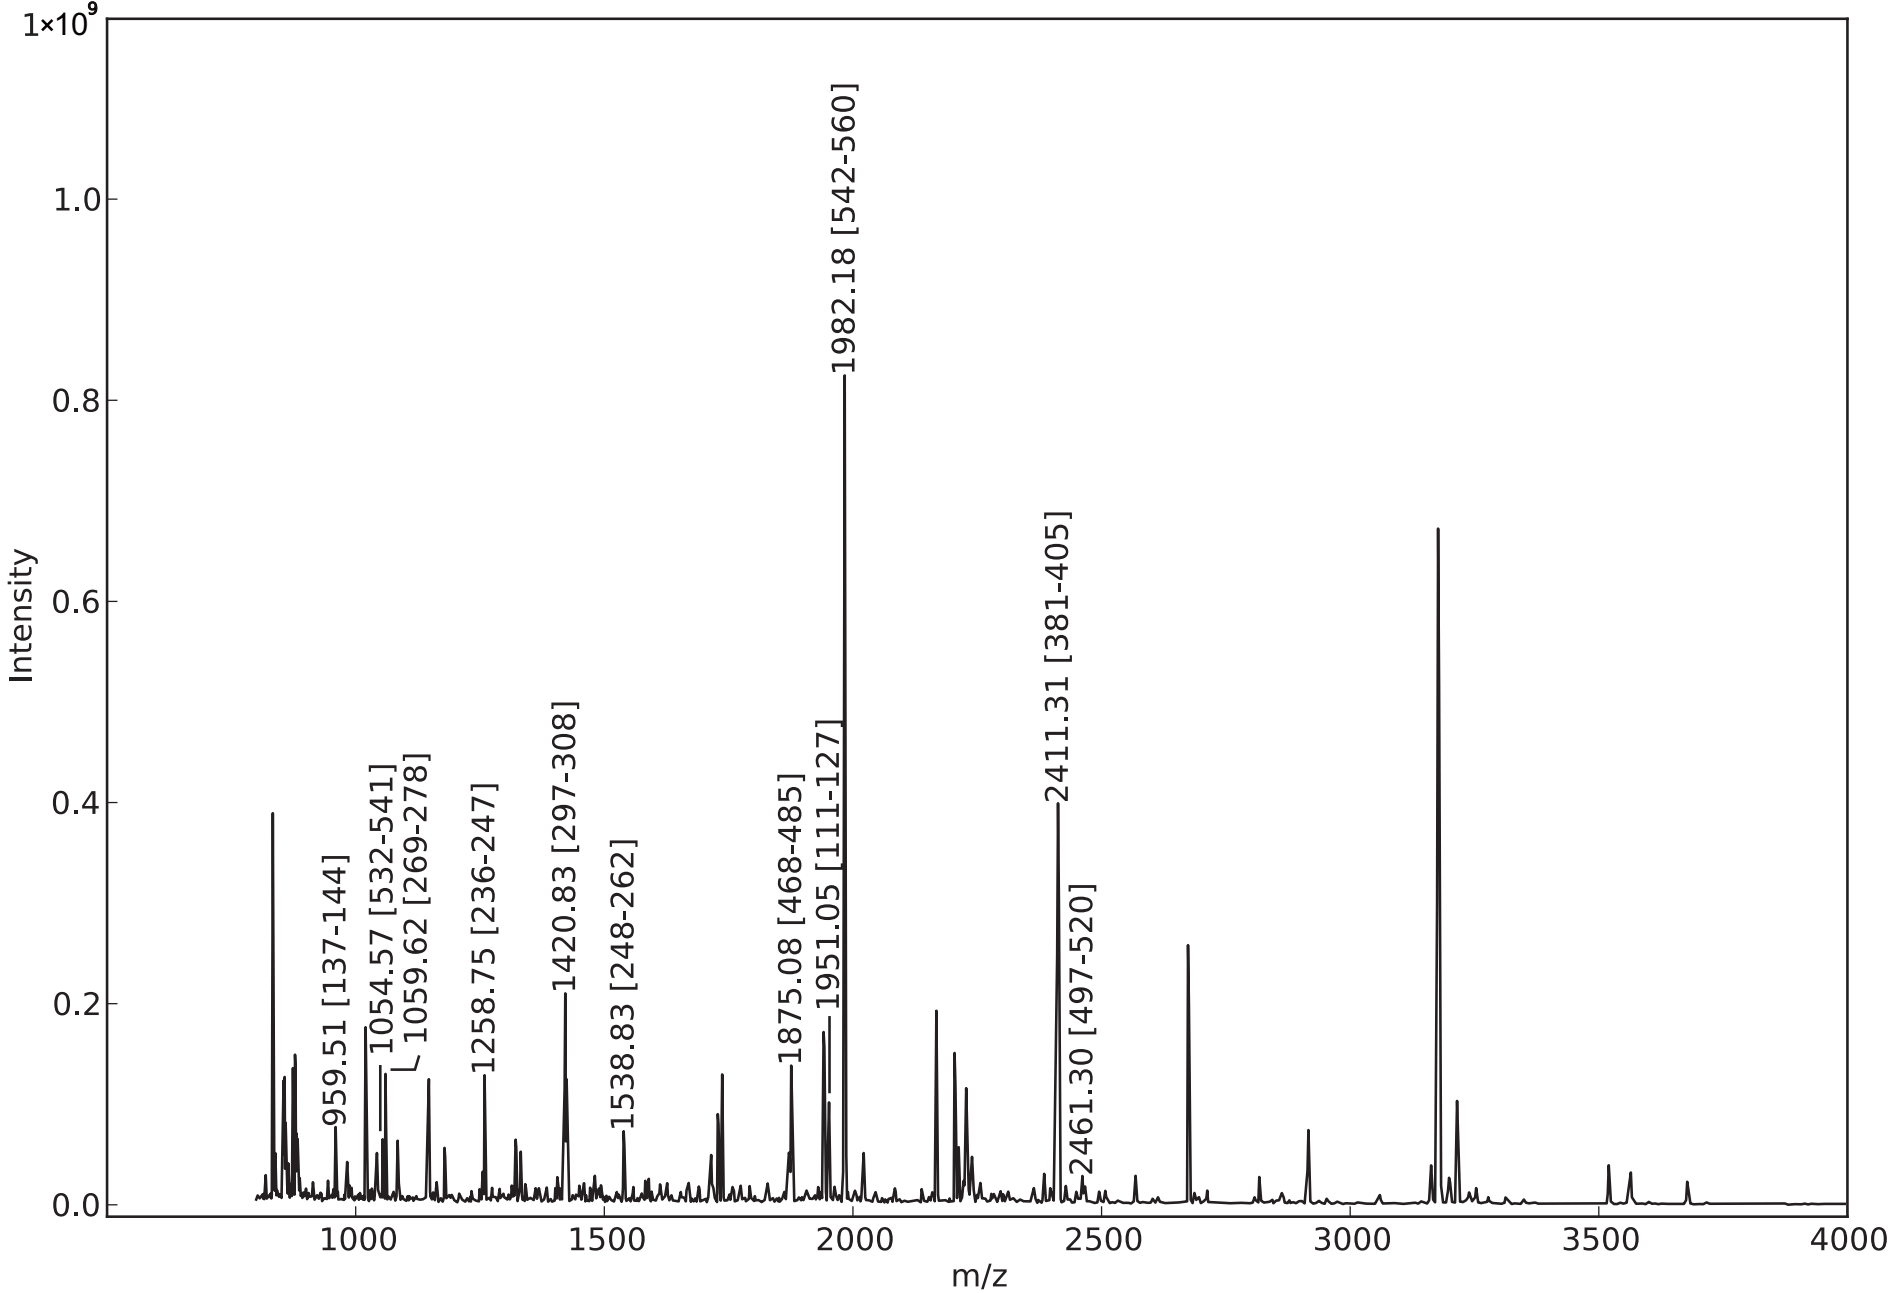



Spot No. 87

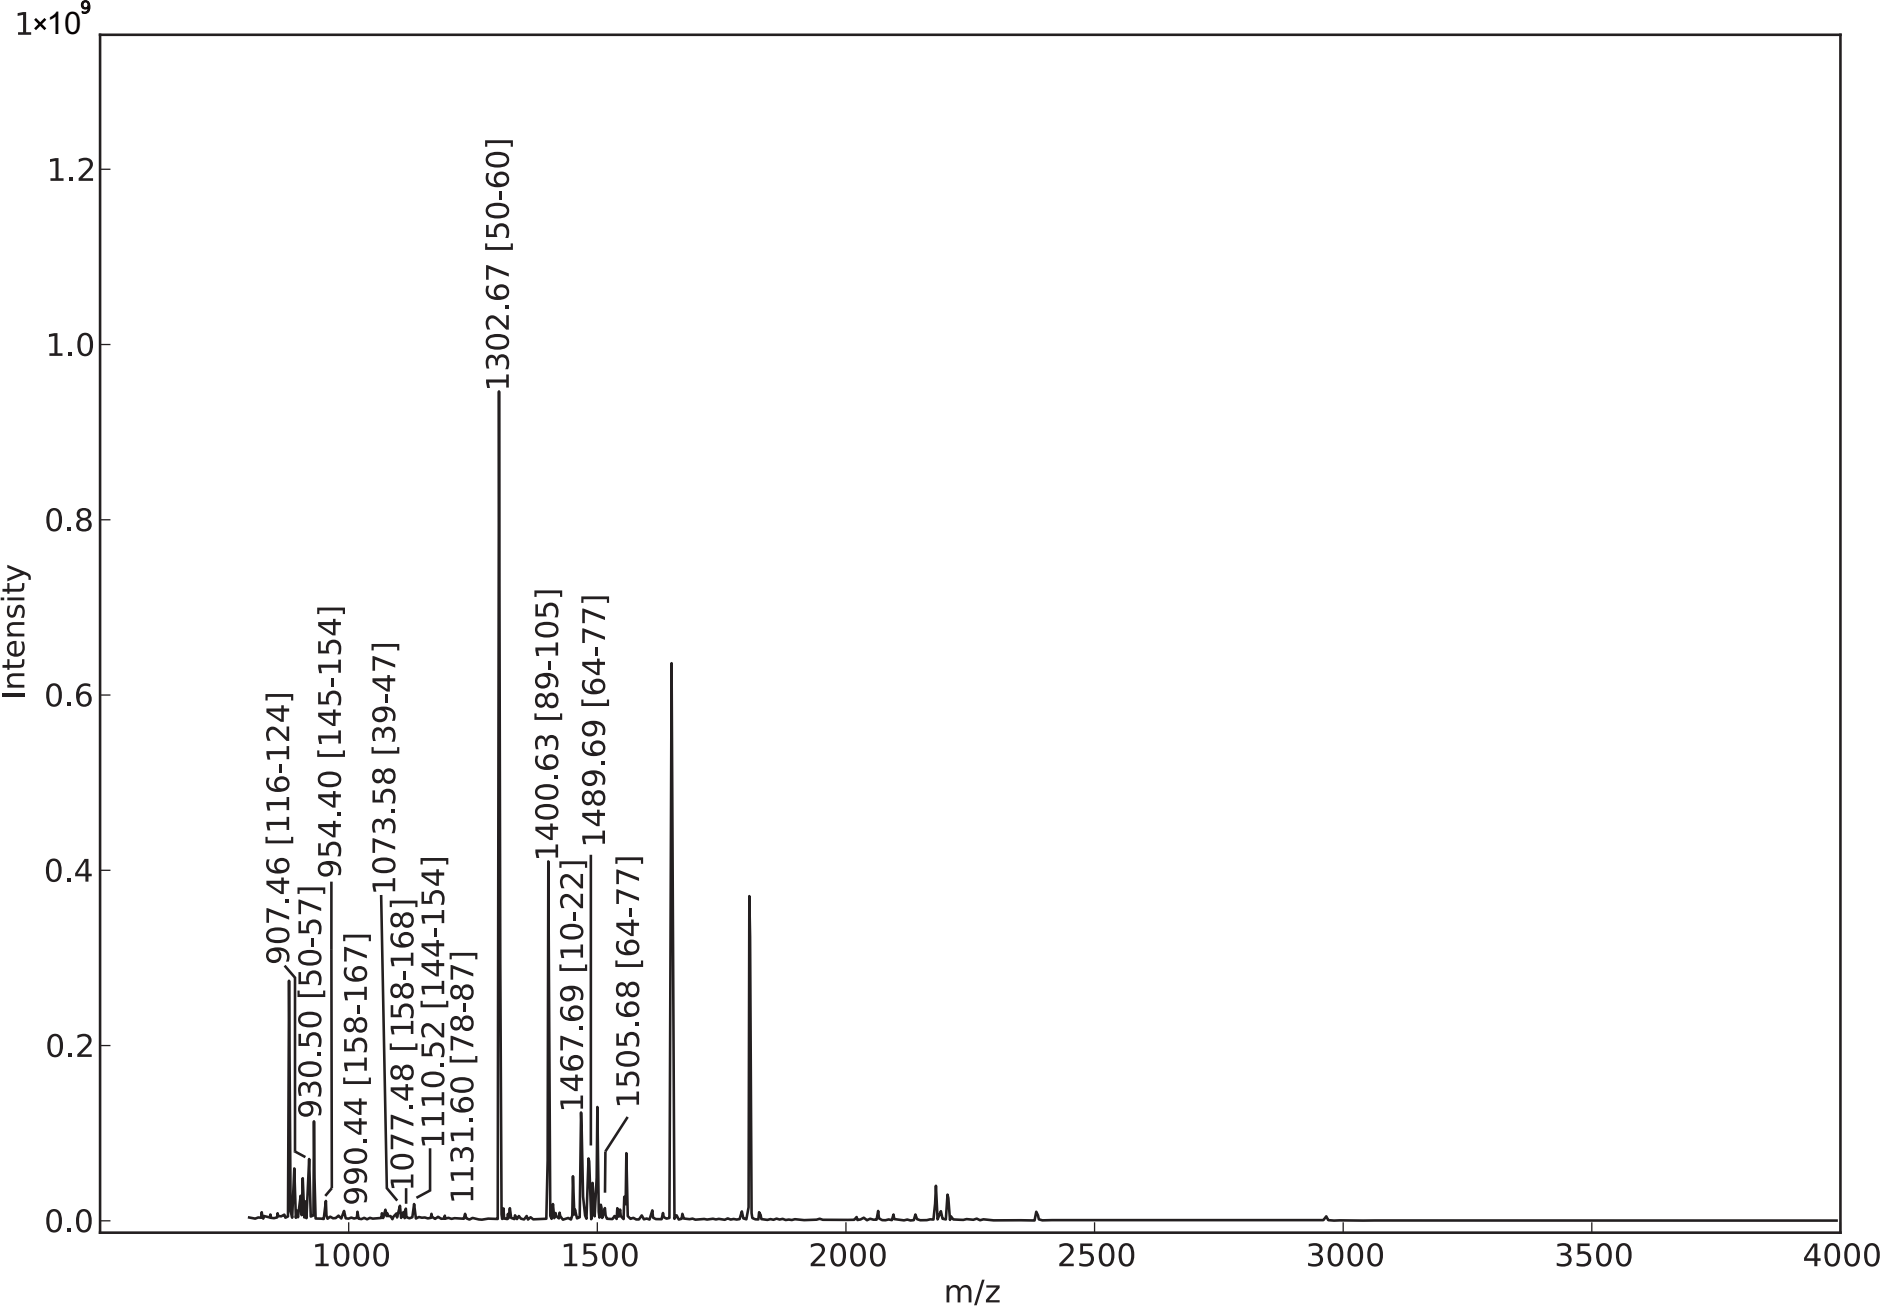

Spot No. 88

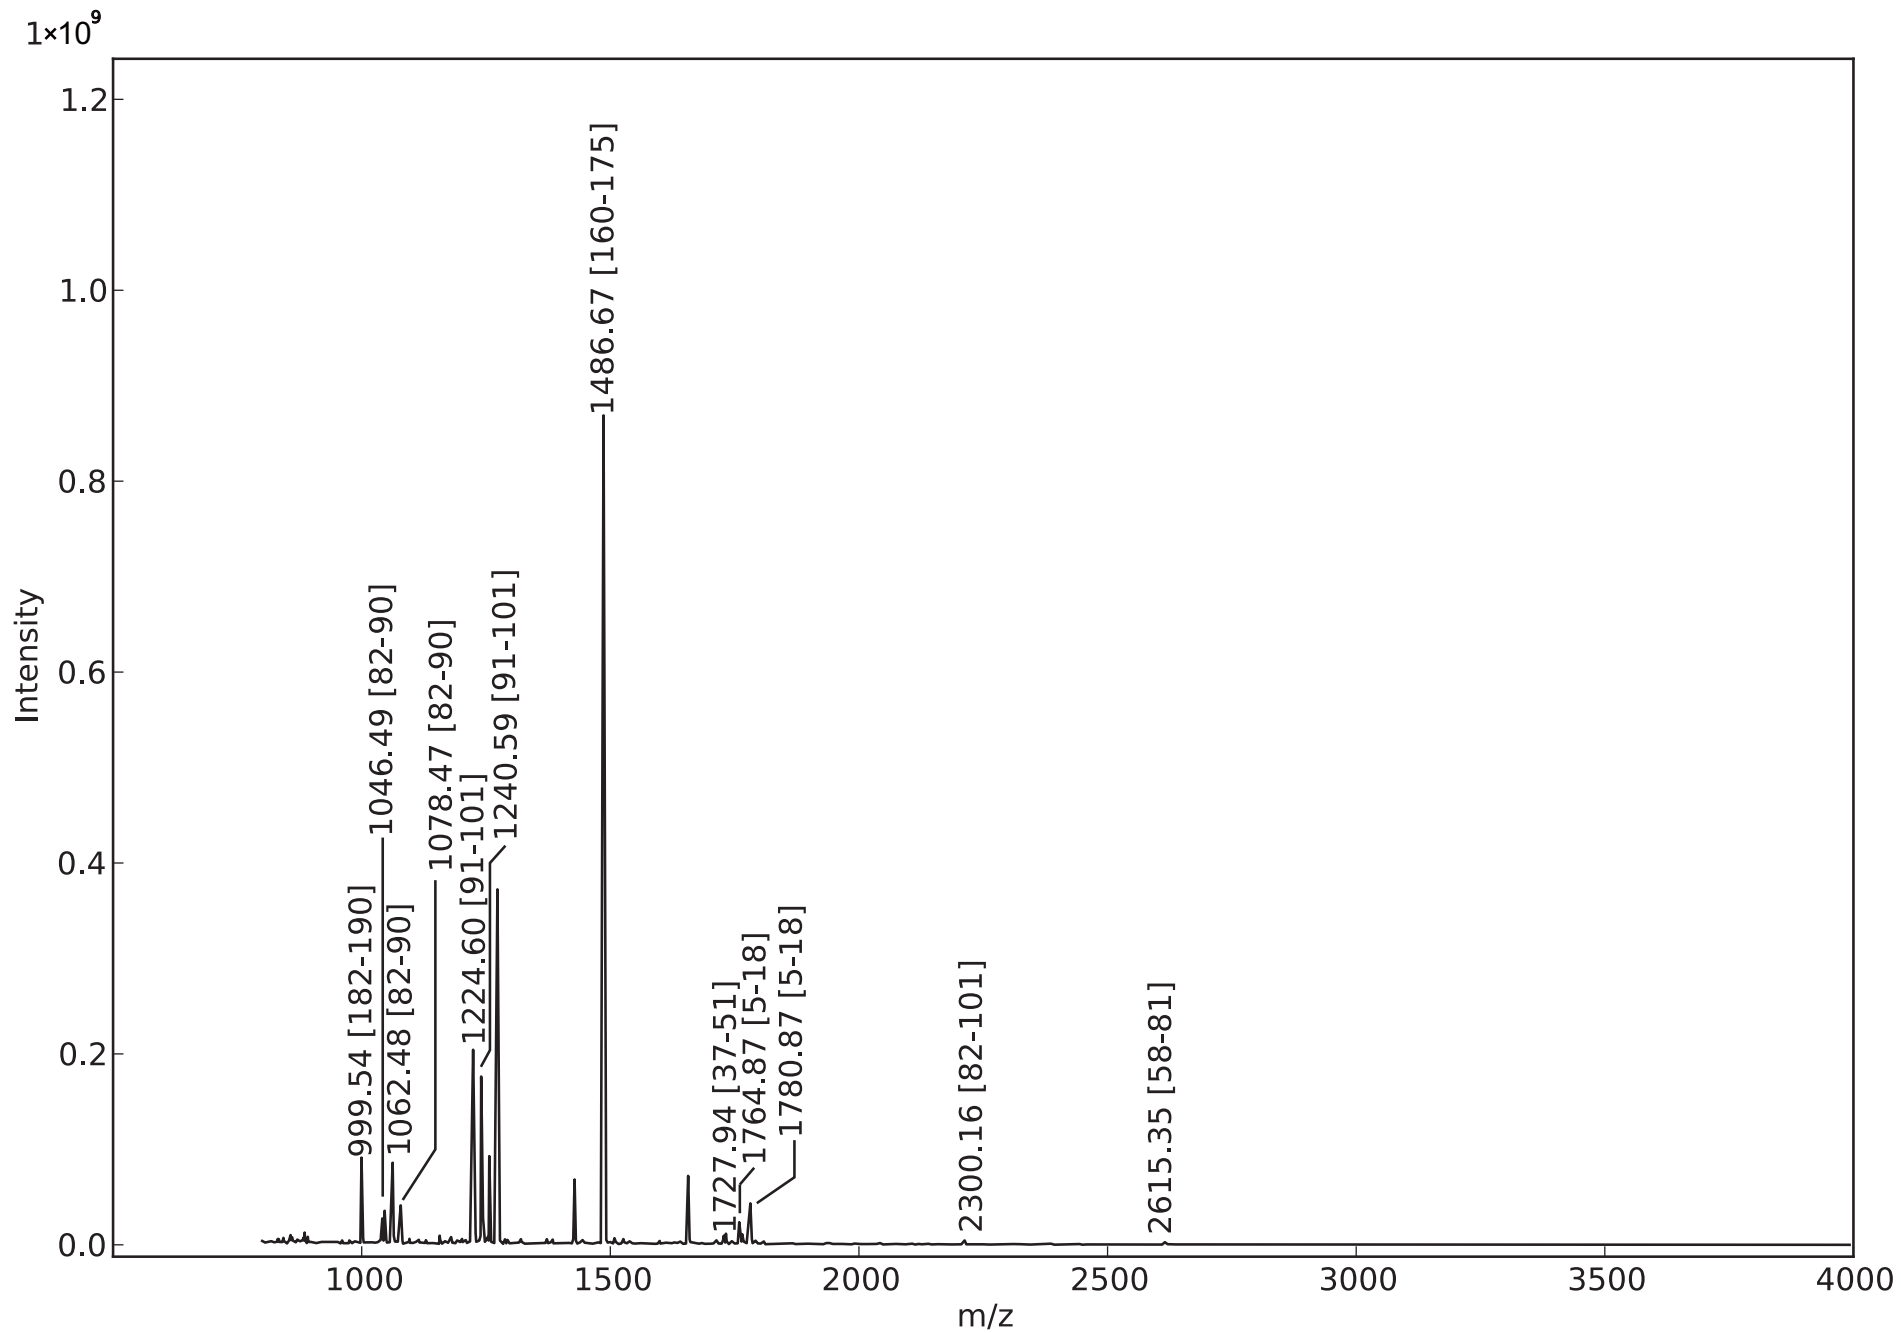

Spot No. 89

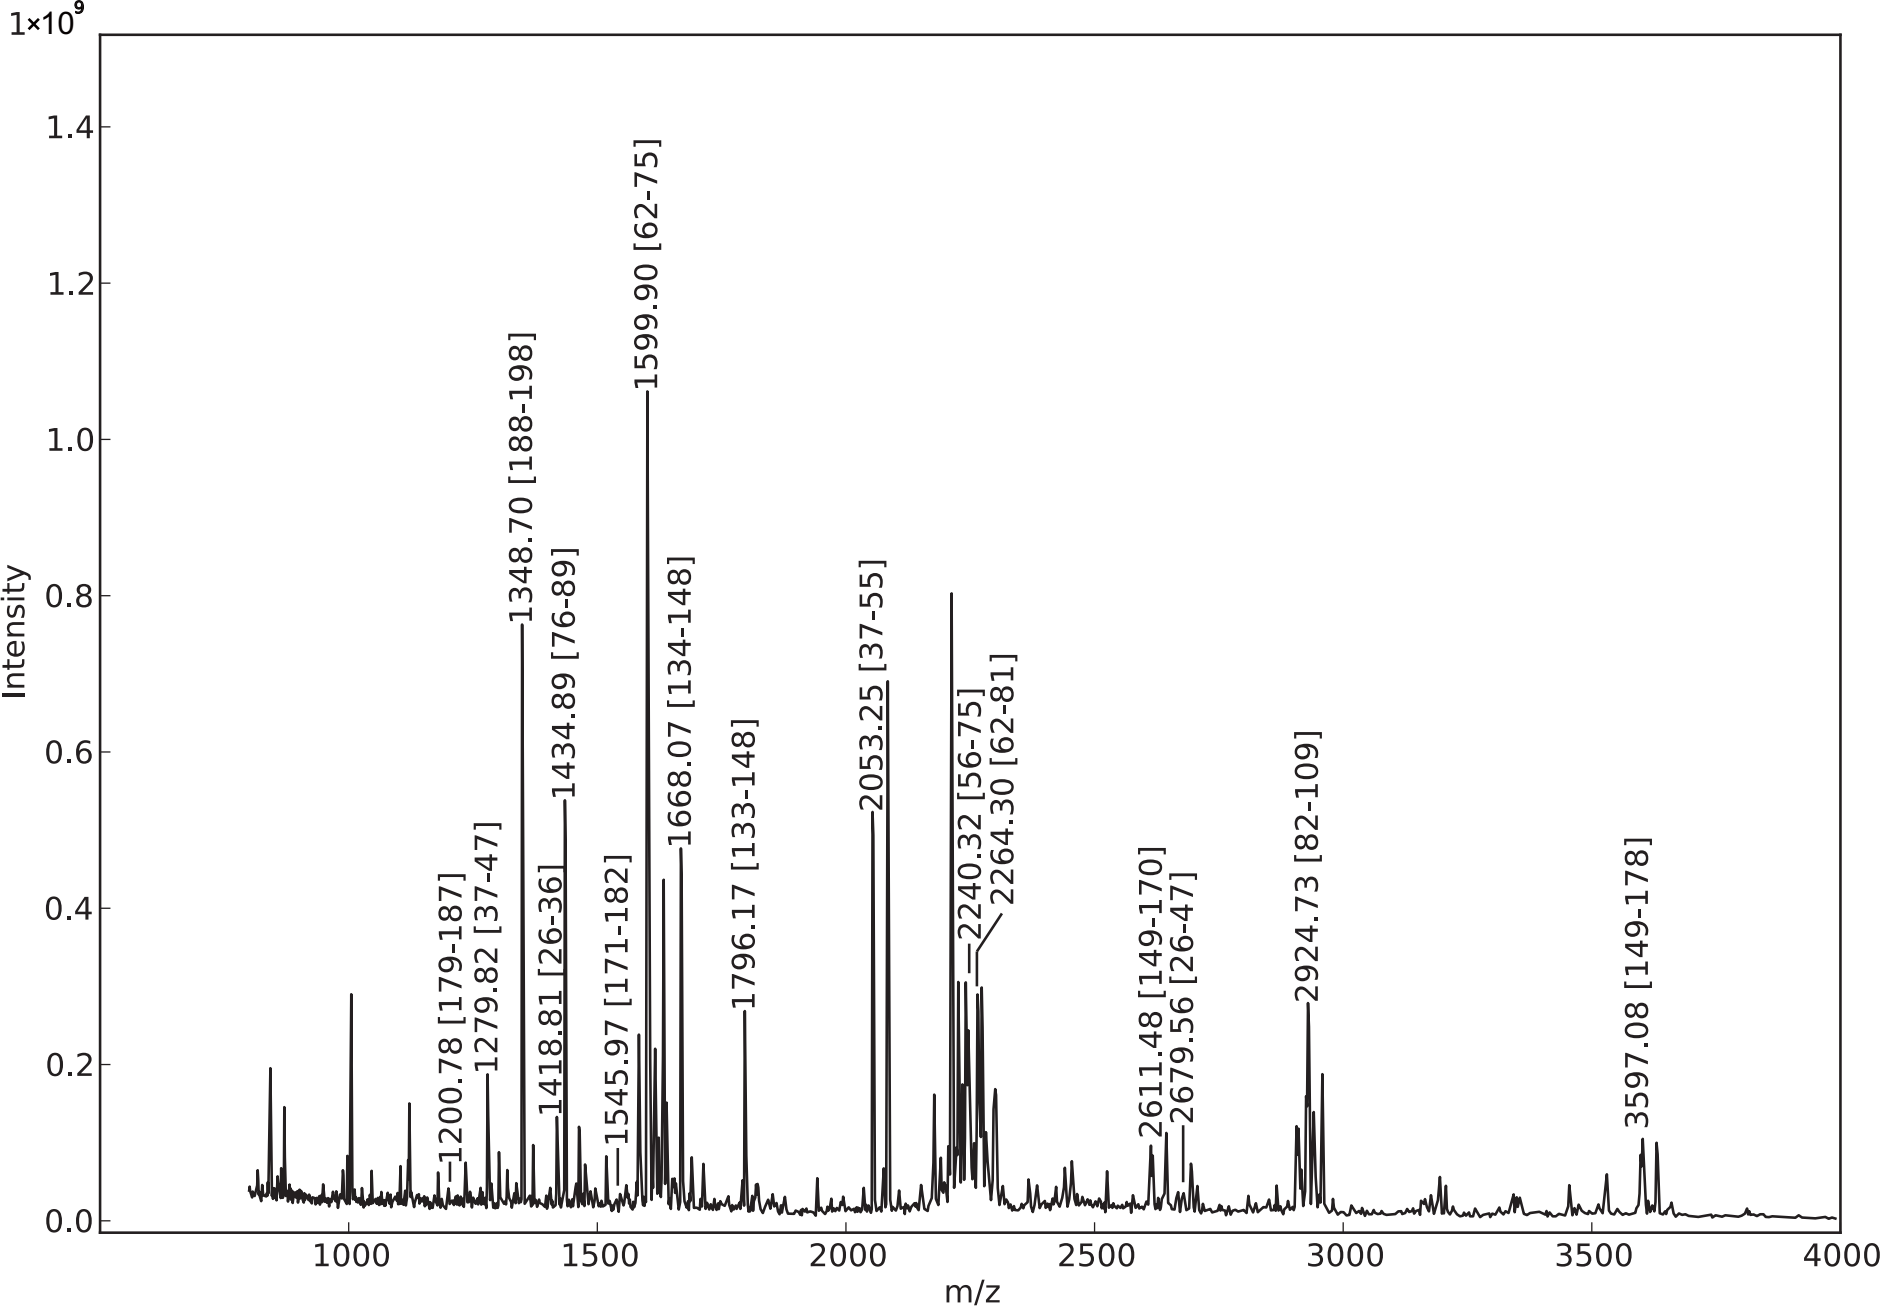

Spot No. 90

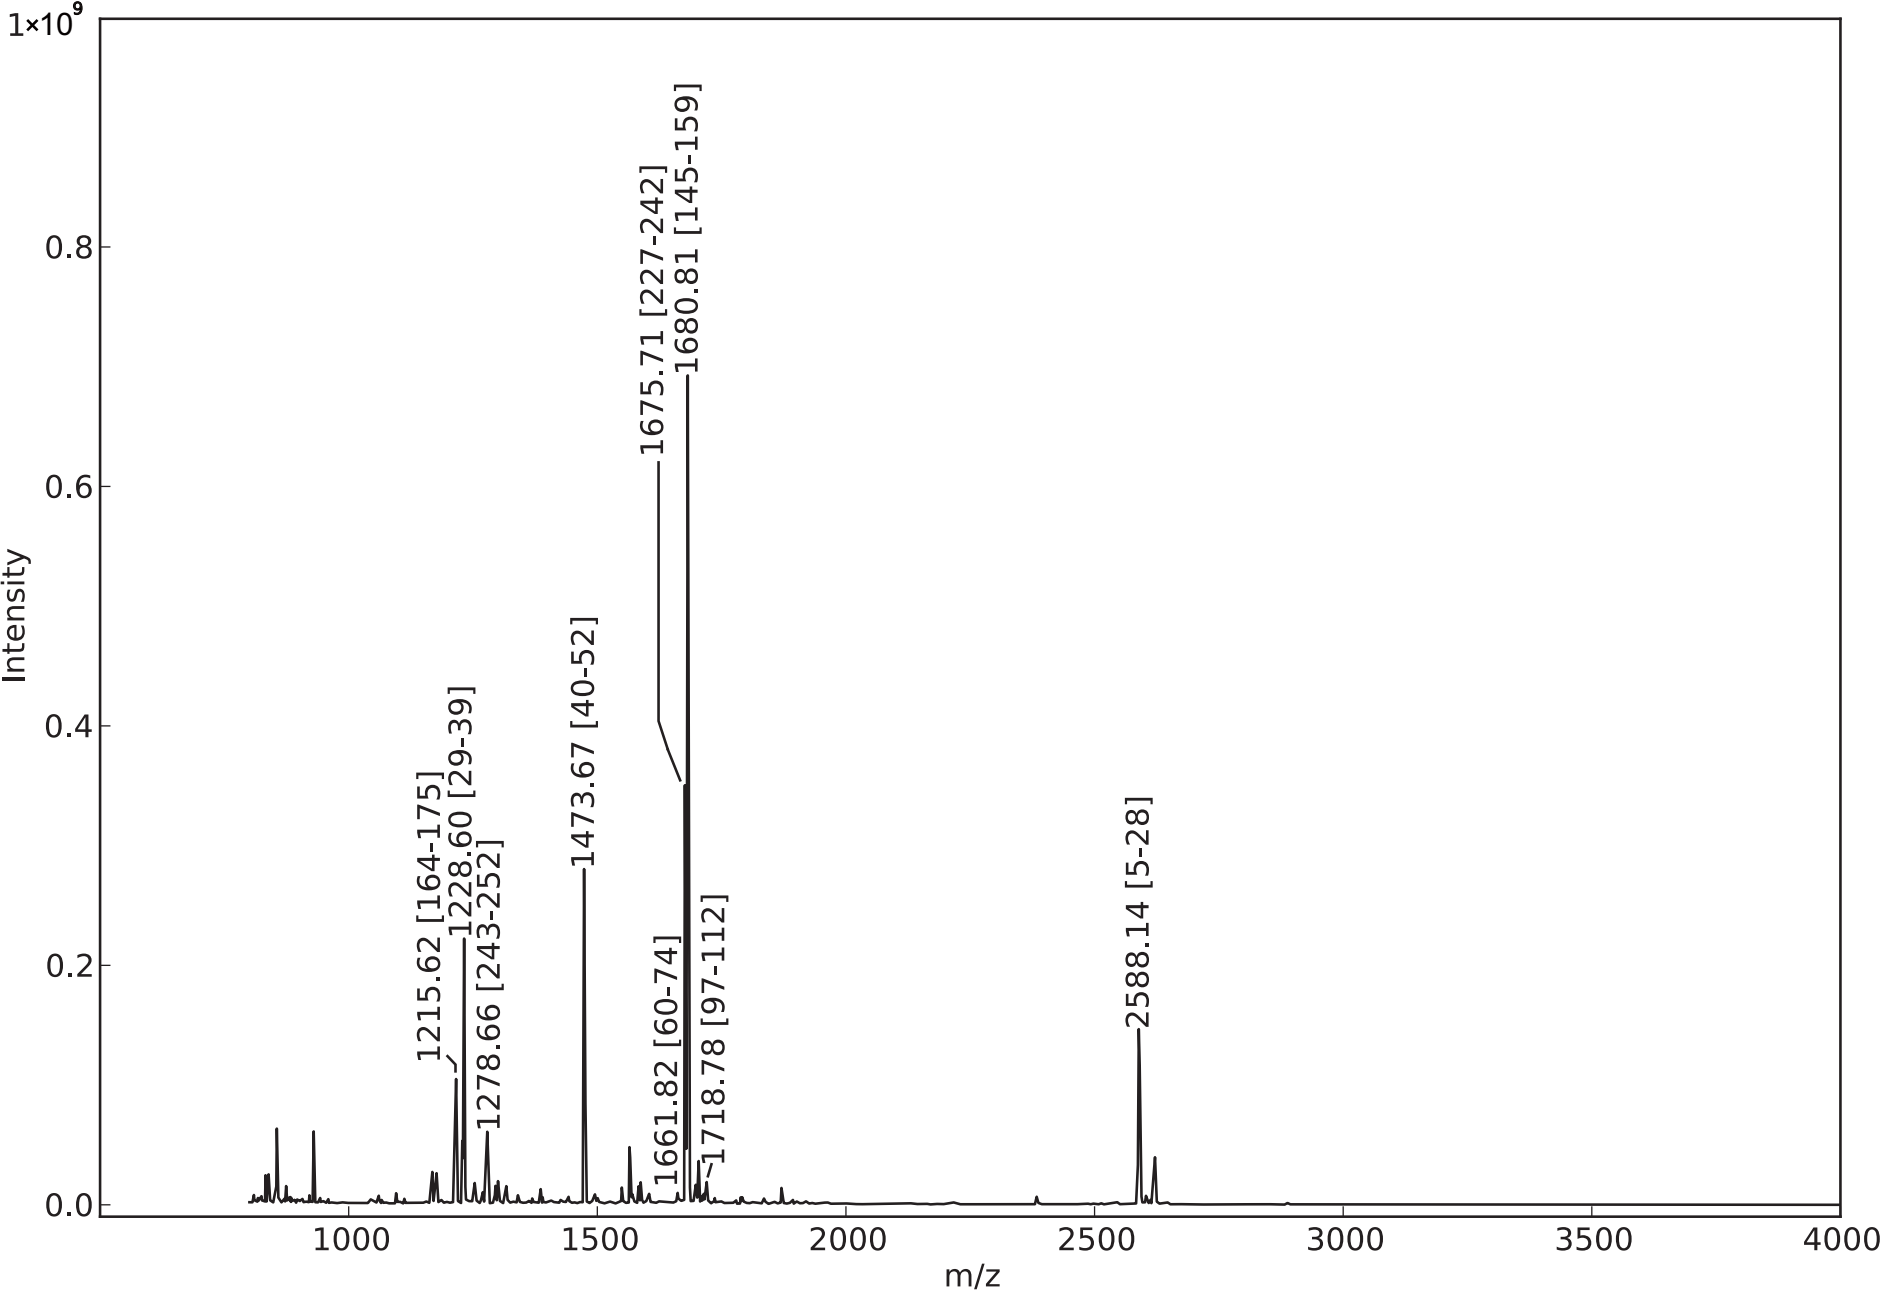

Spot No. 91

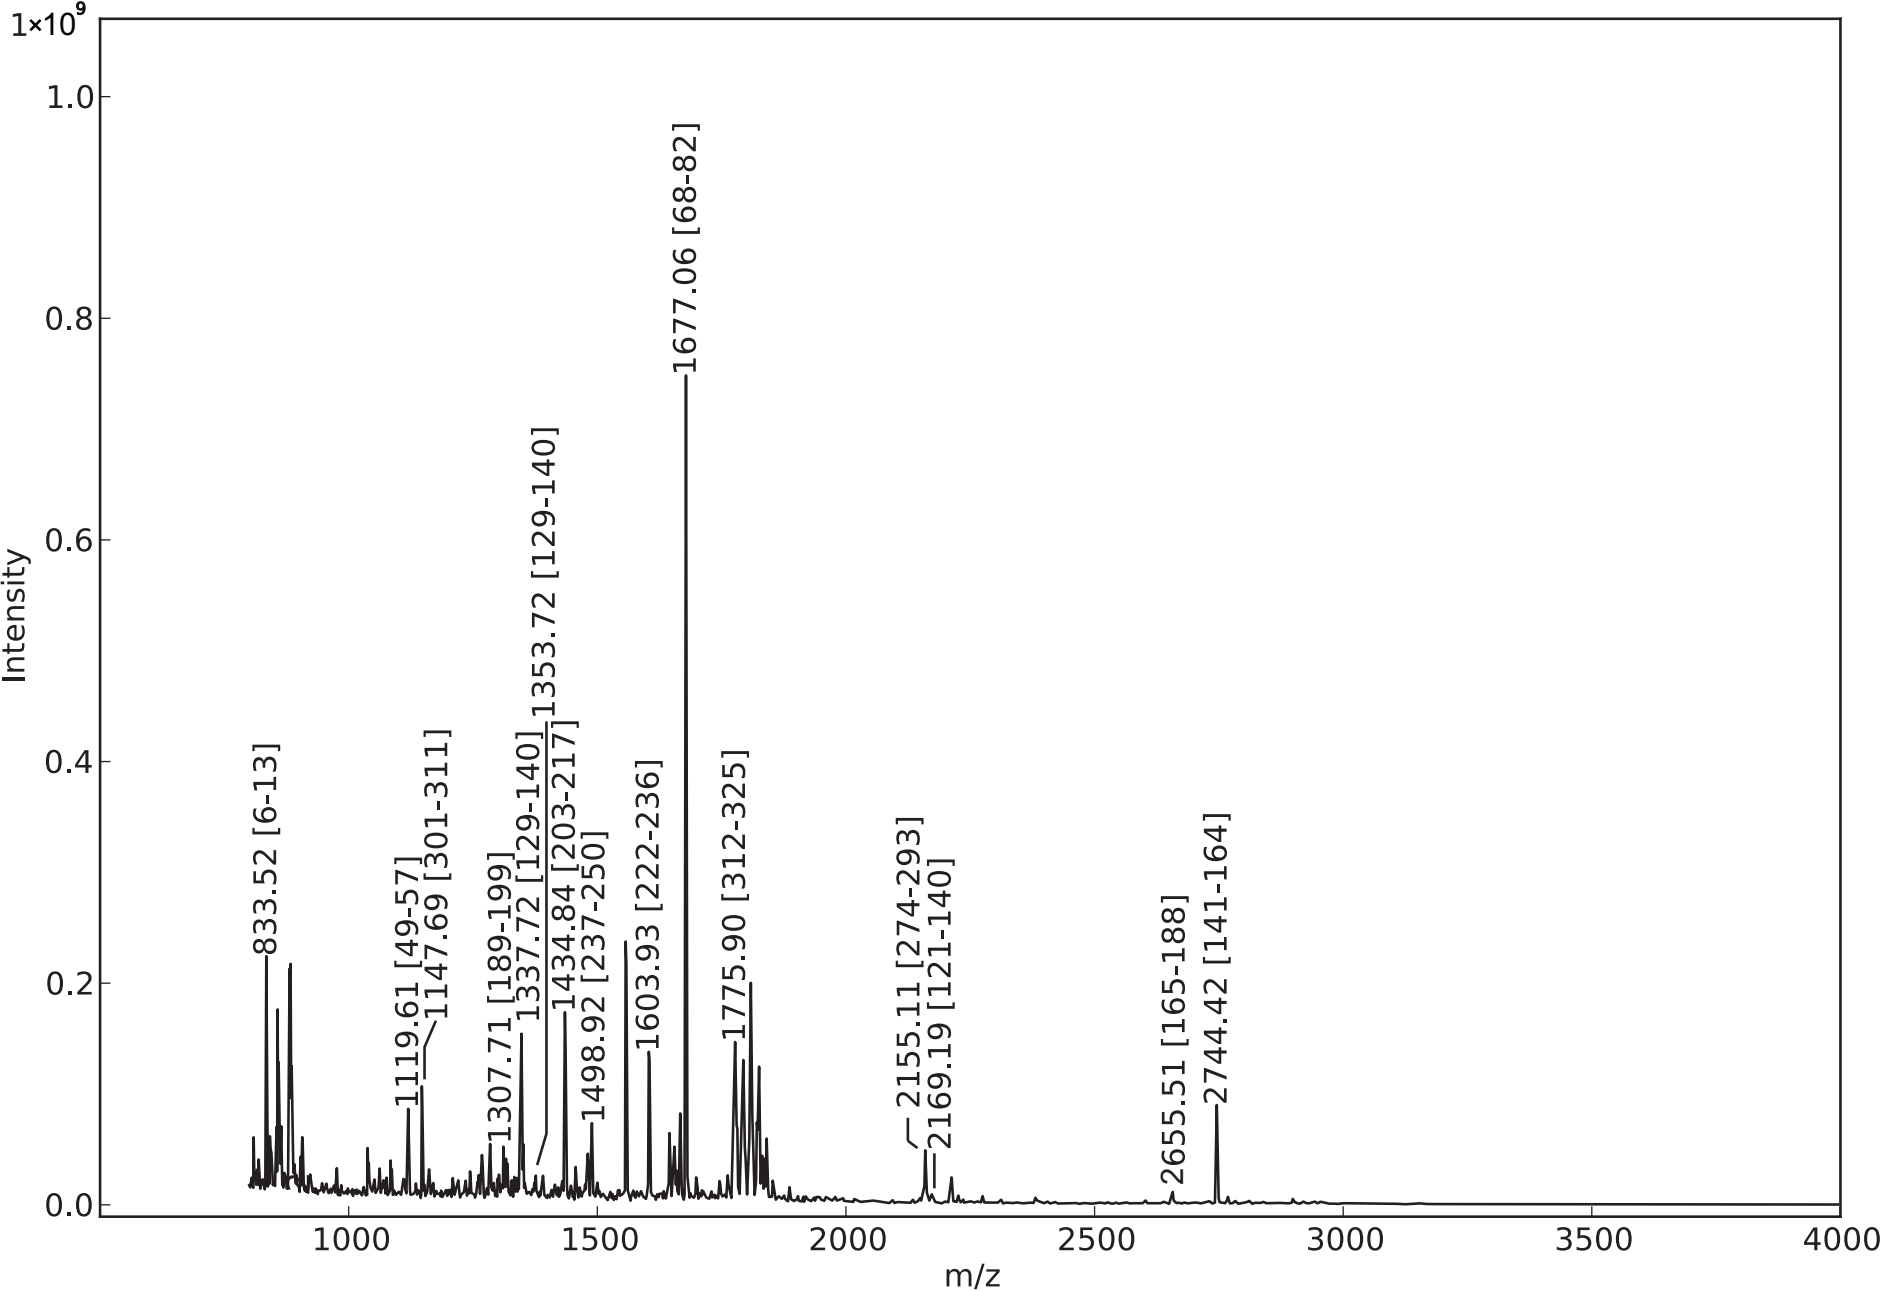

Spot No. 92

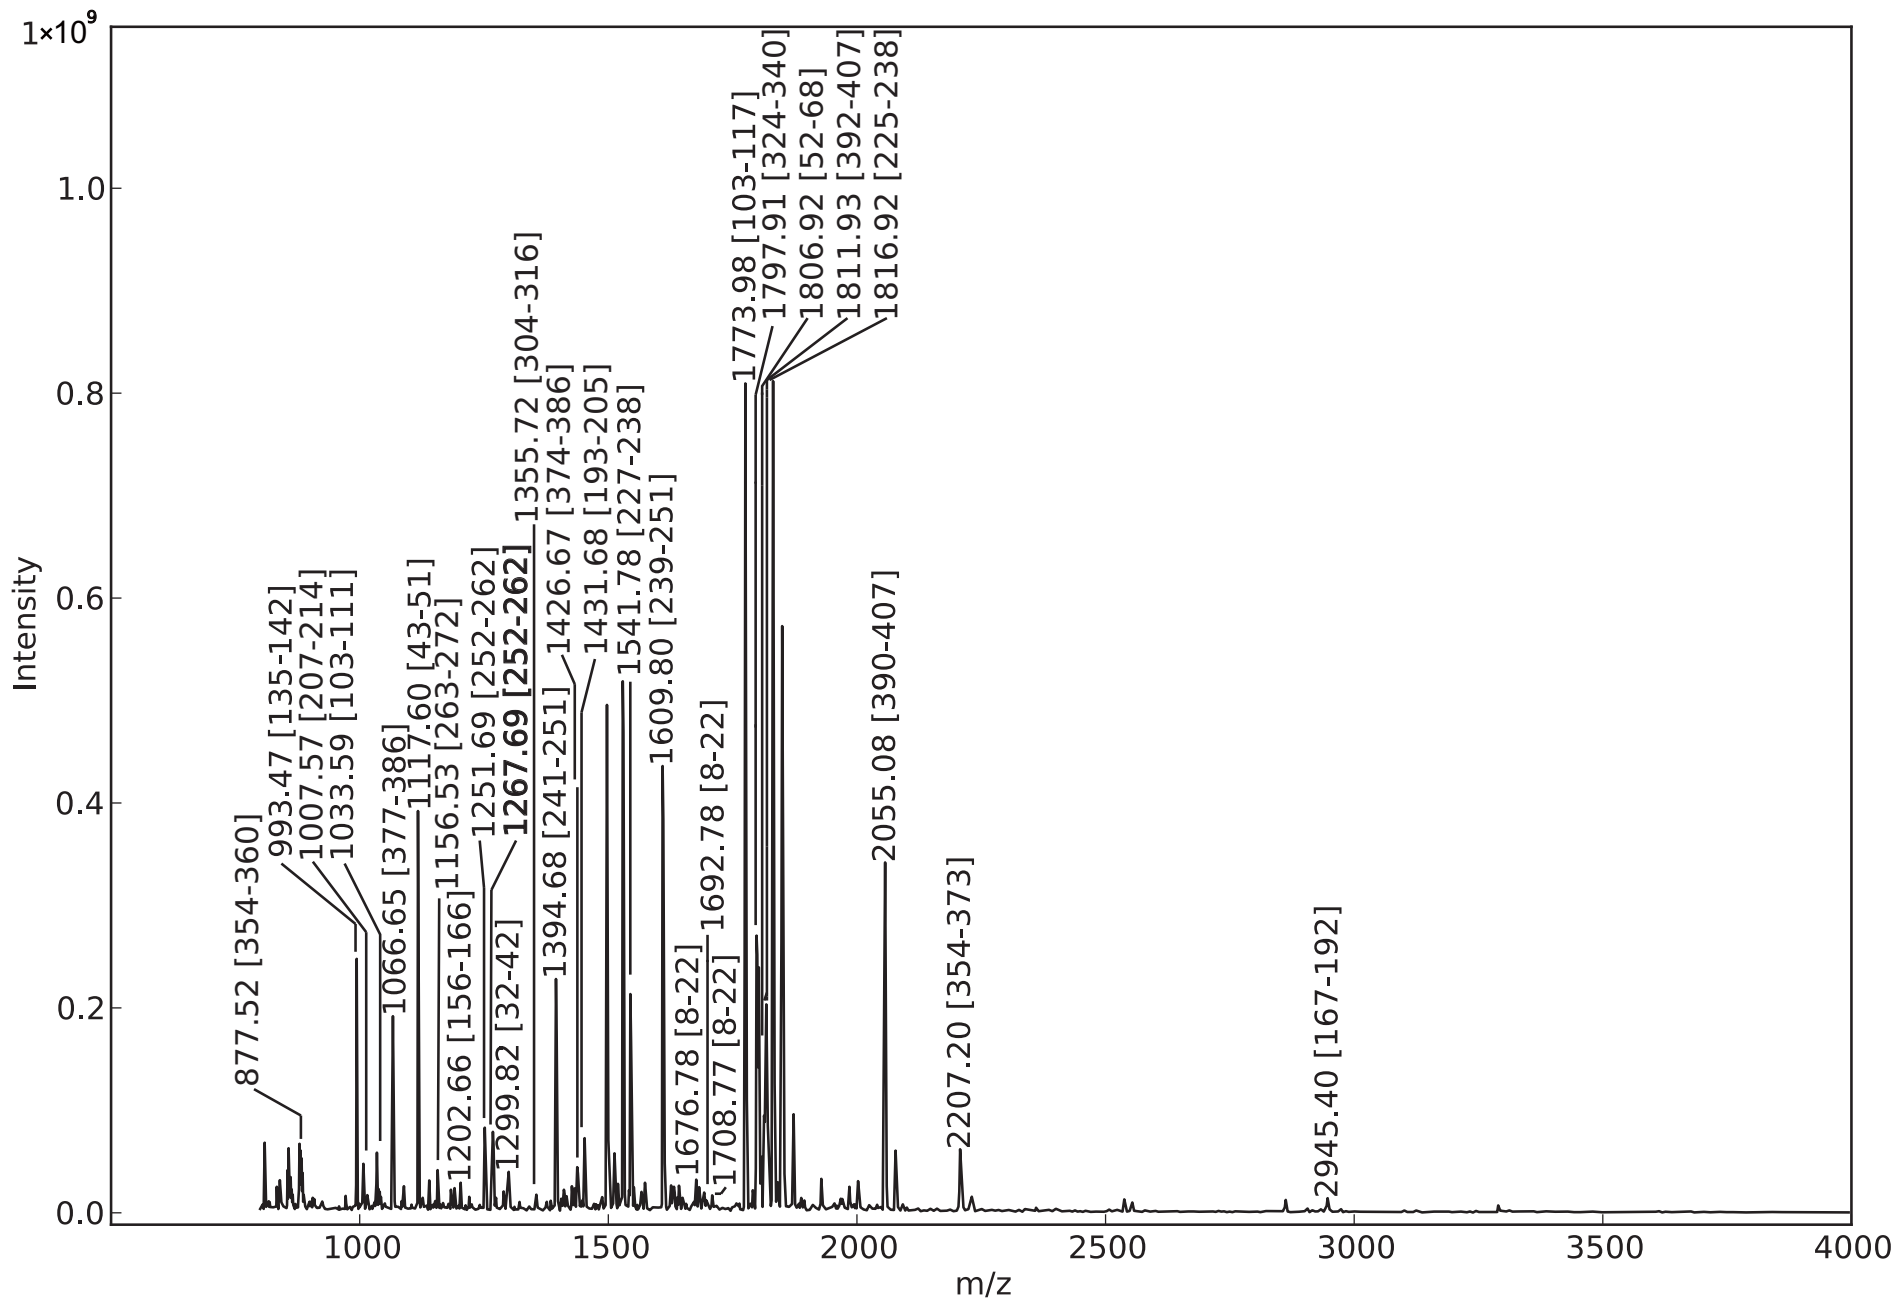

Spot No. 93

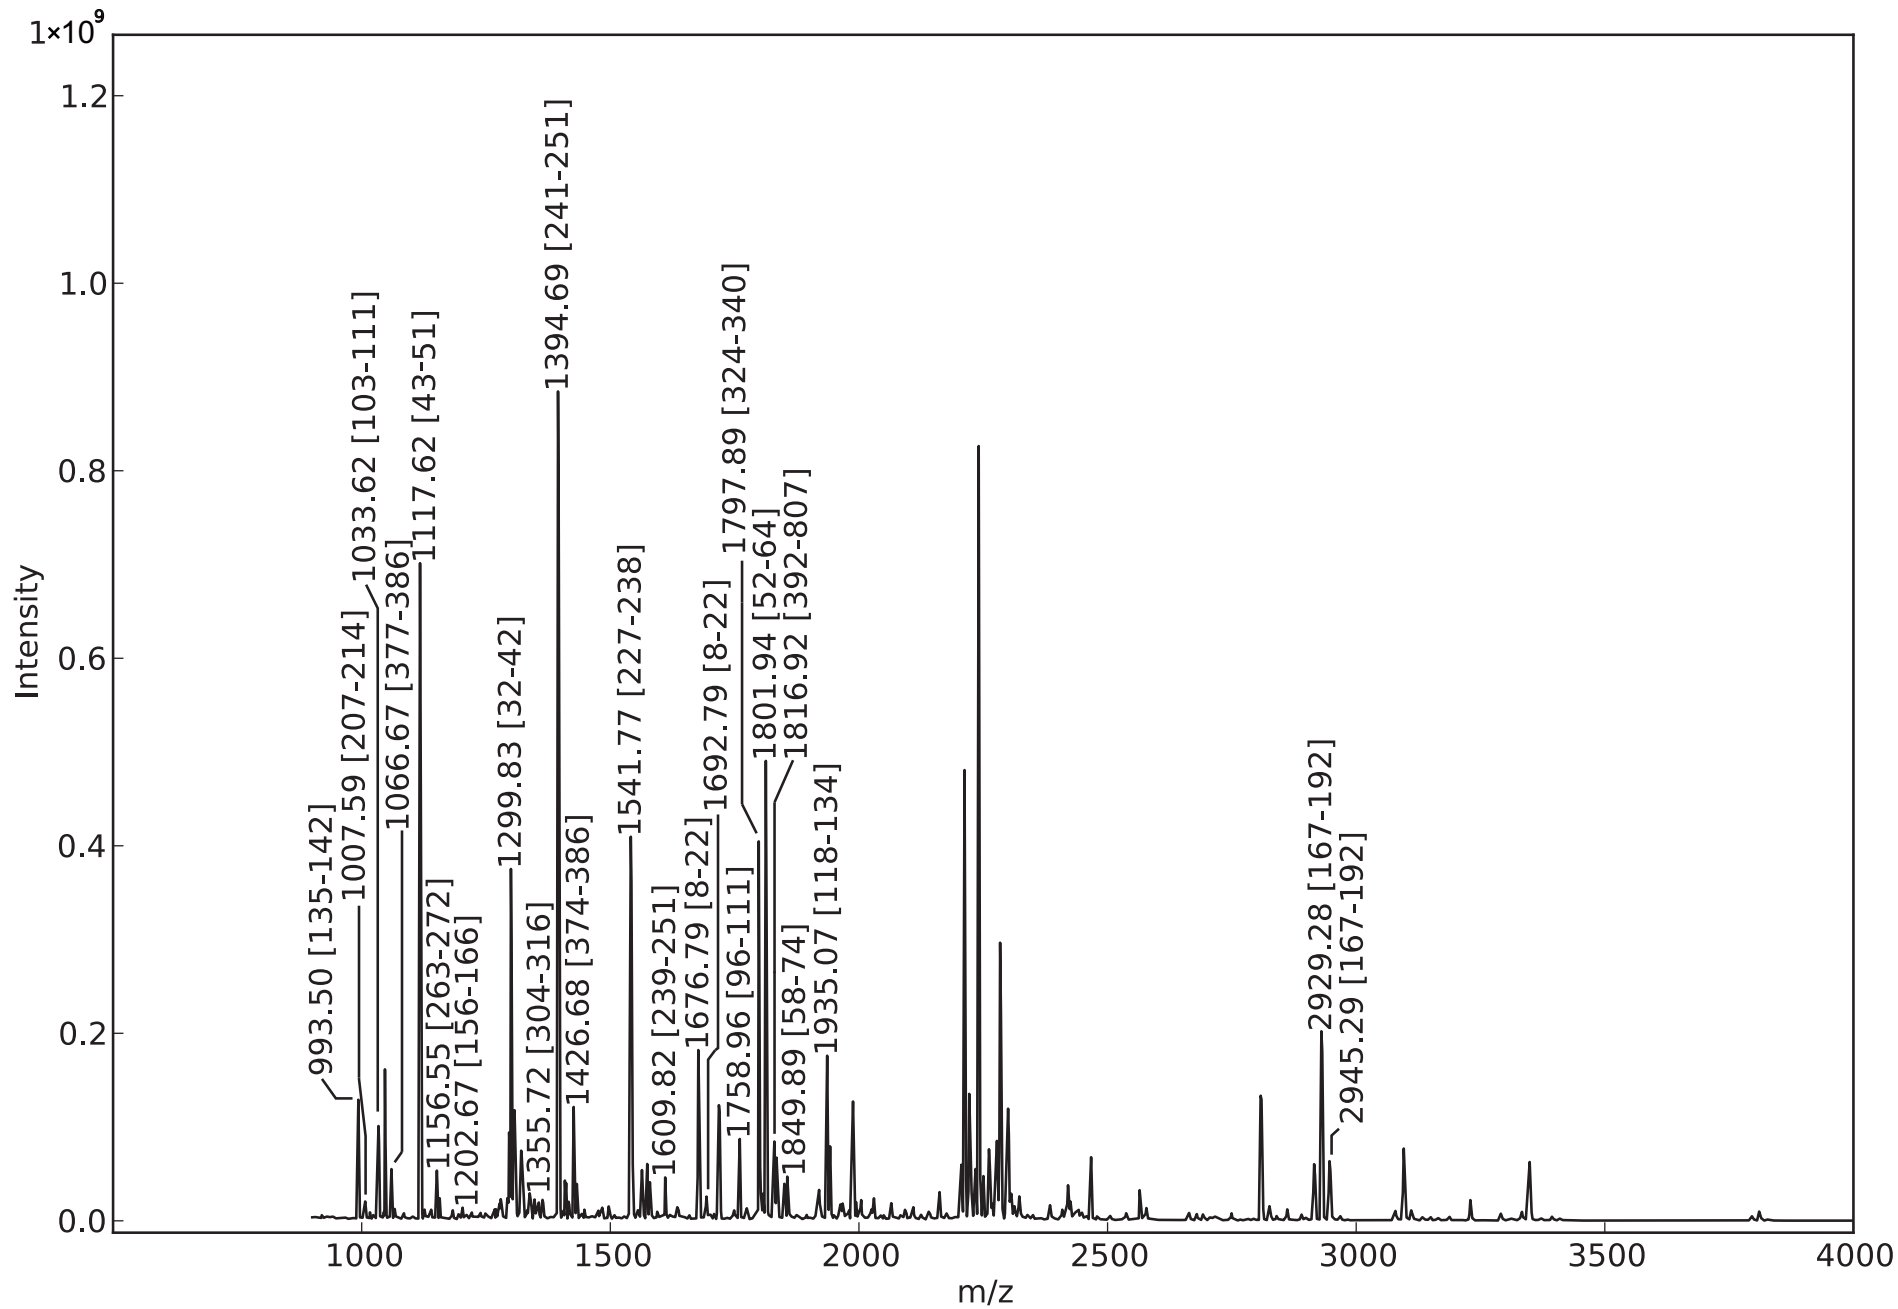

Spot No. 94

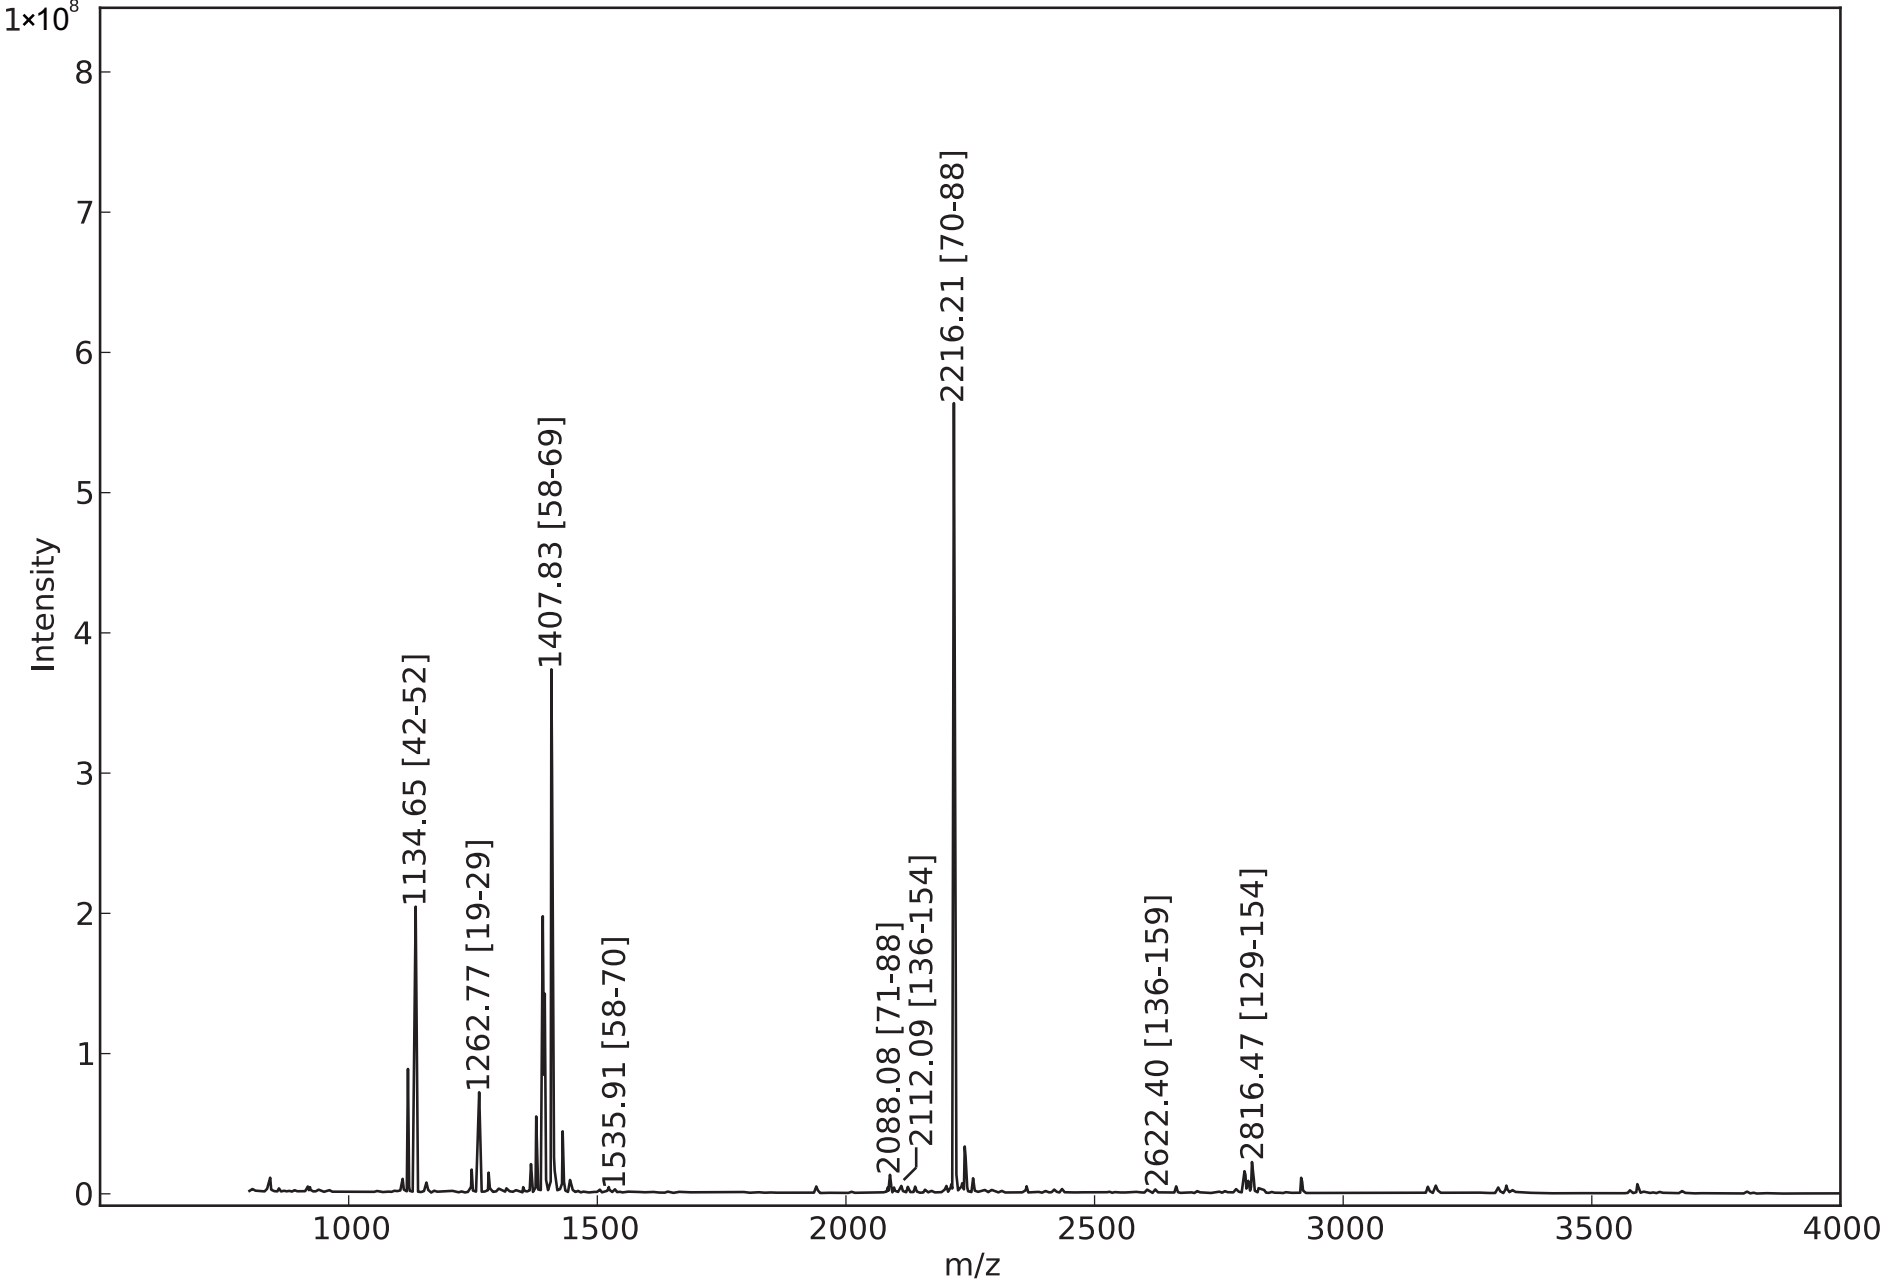



Spot No. 95

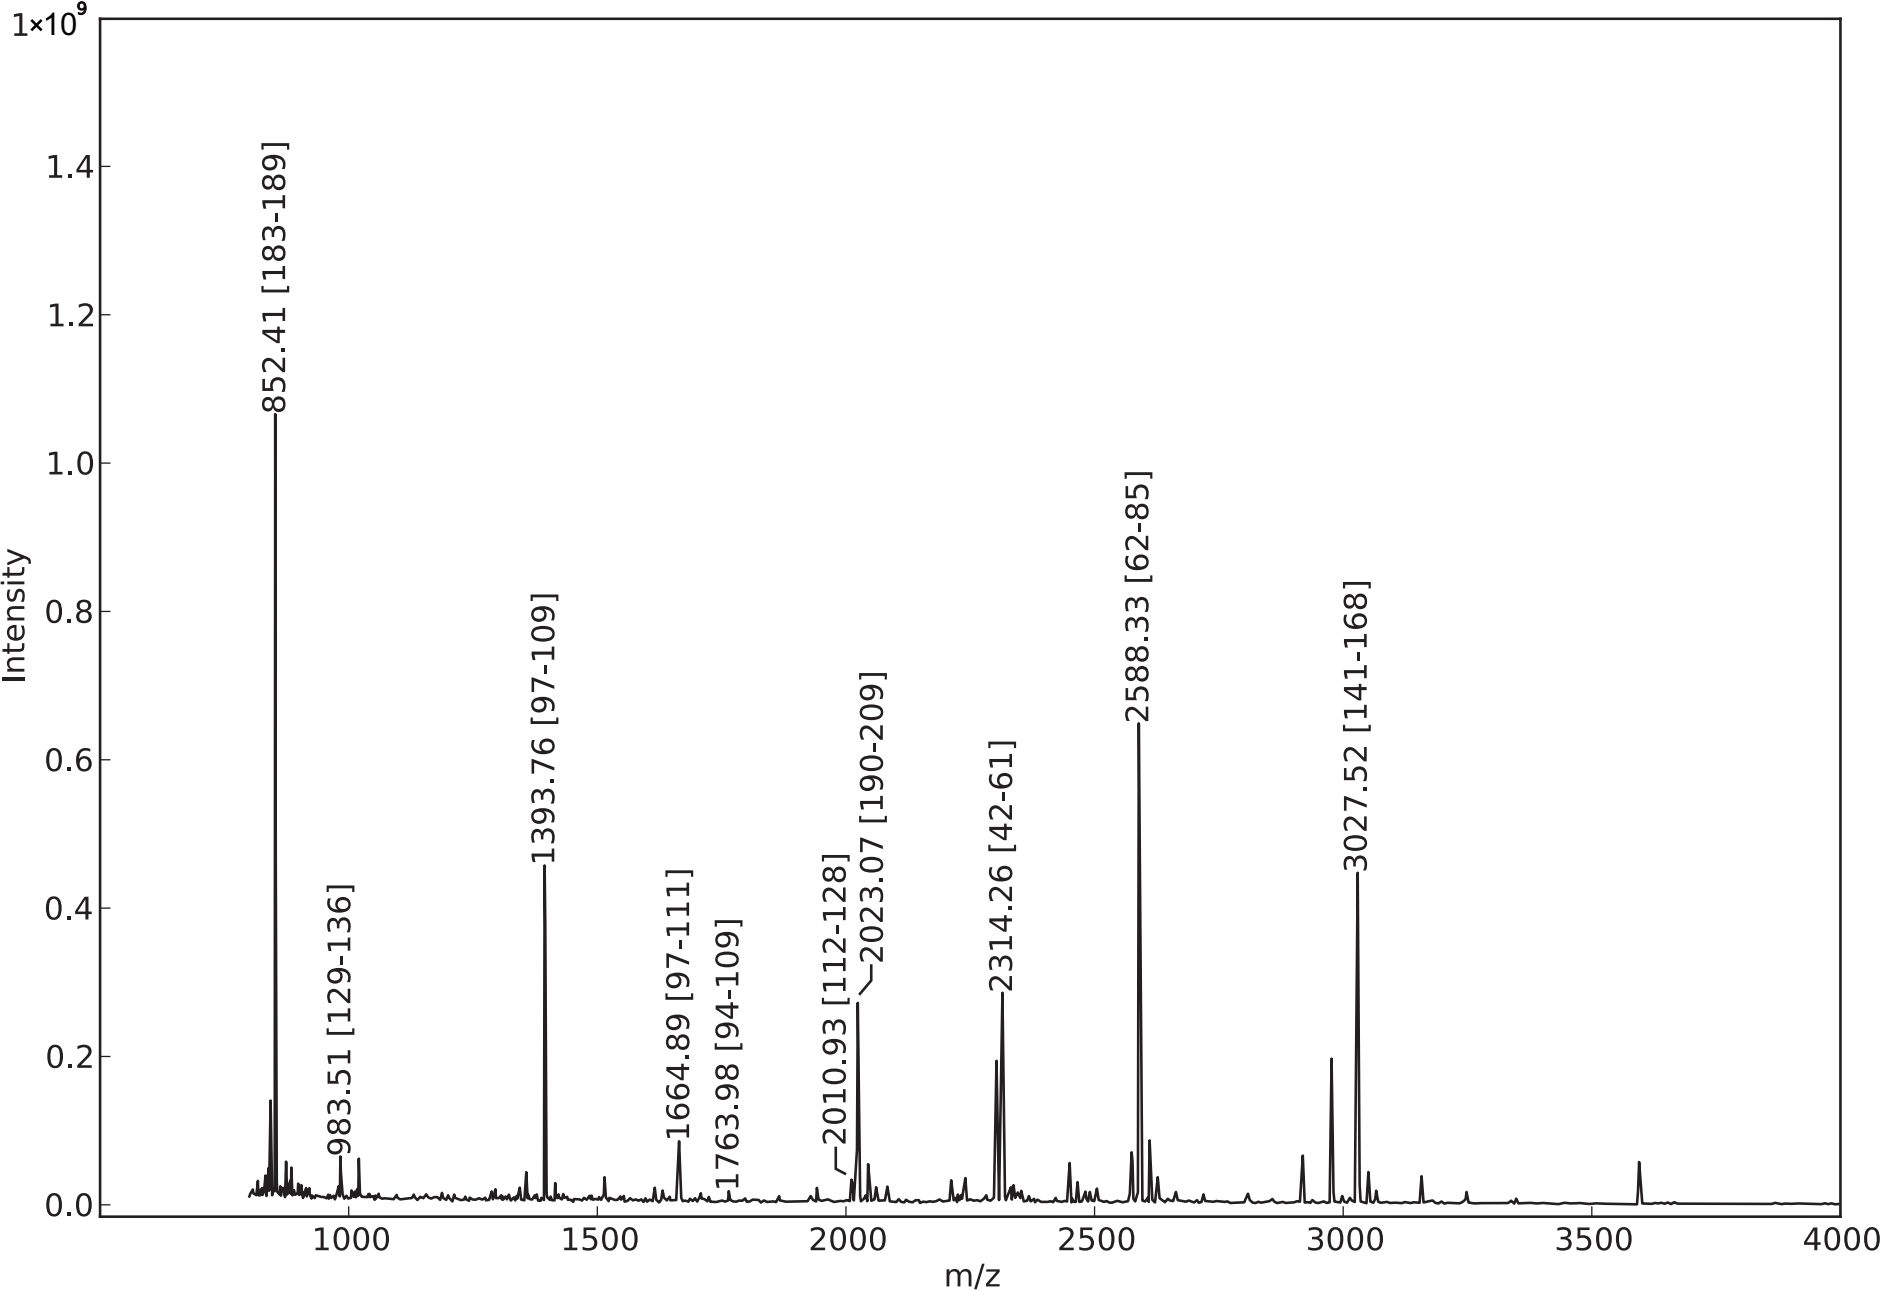

Spot No. 96

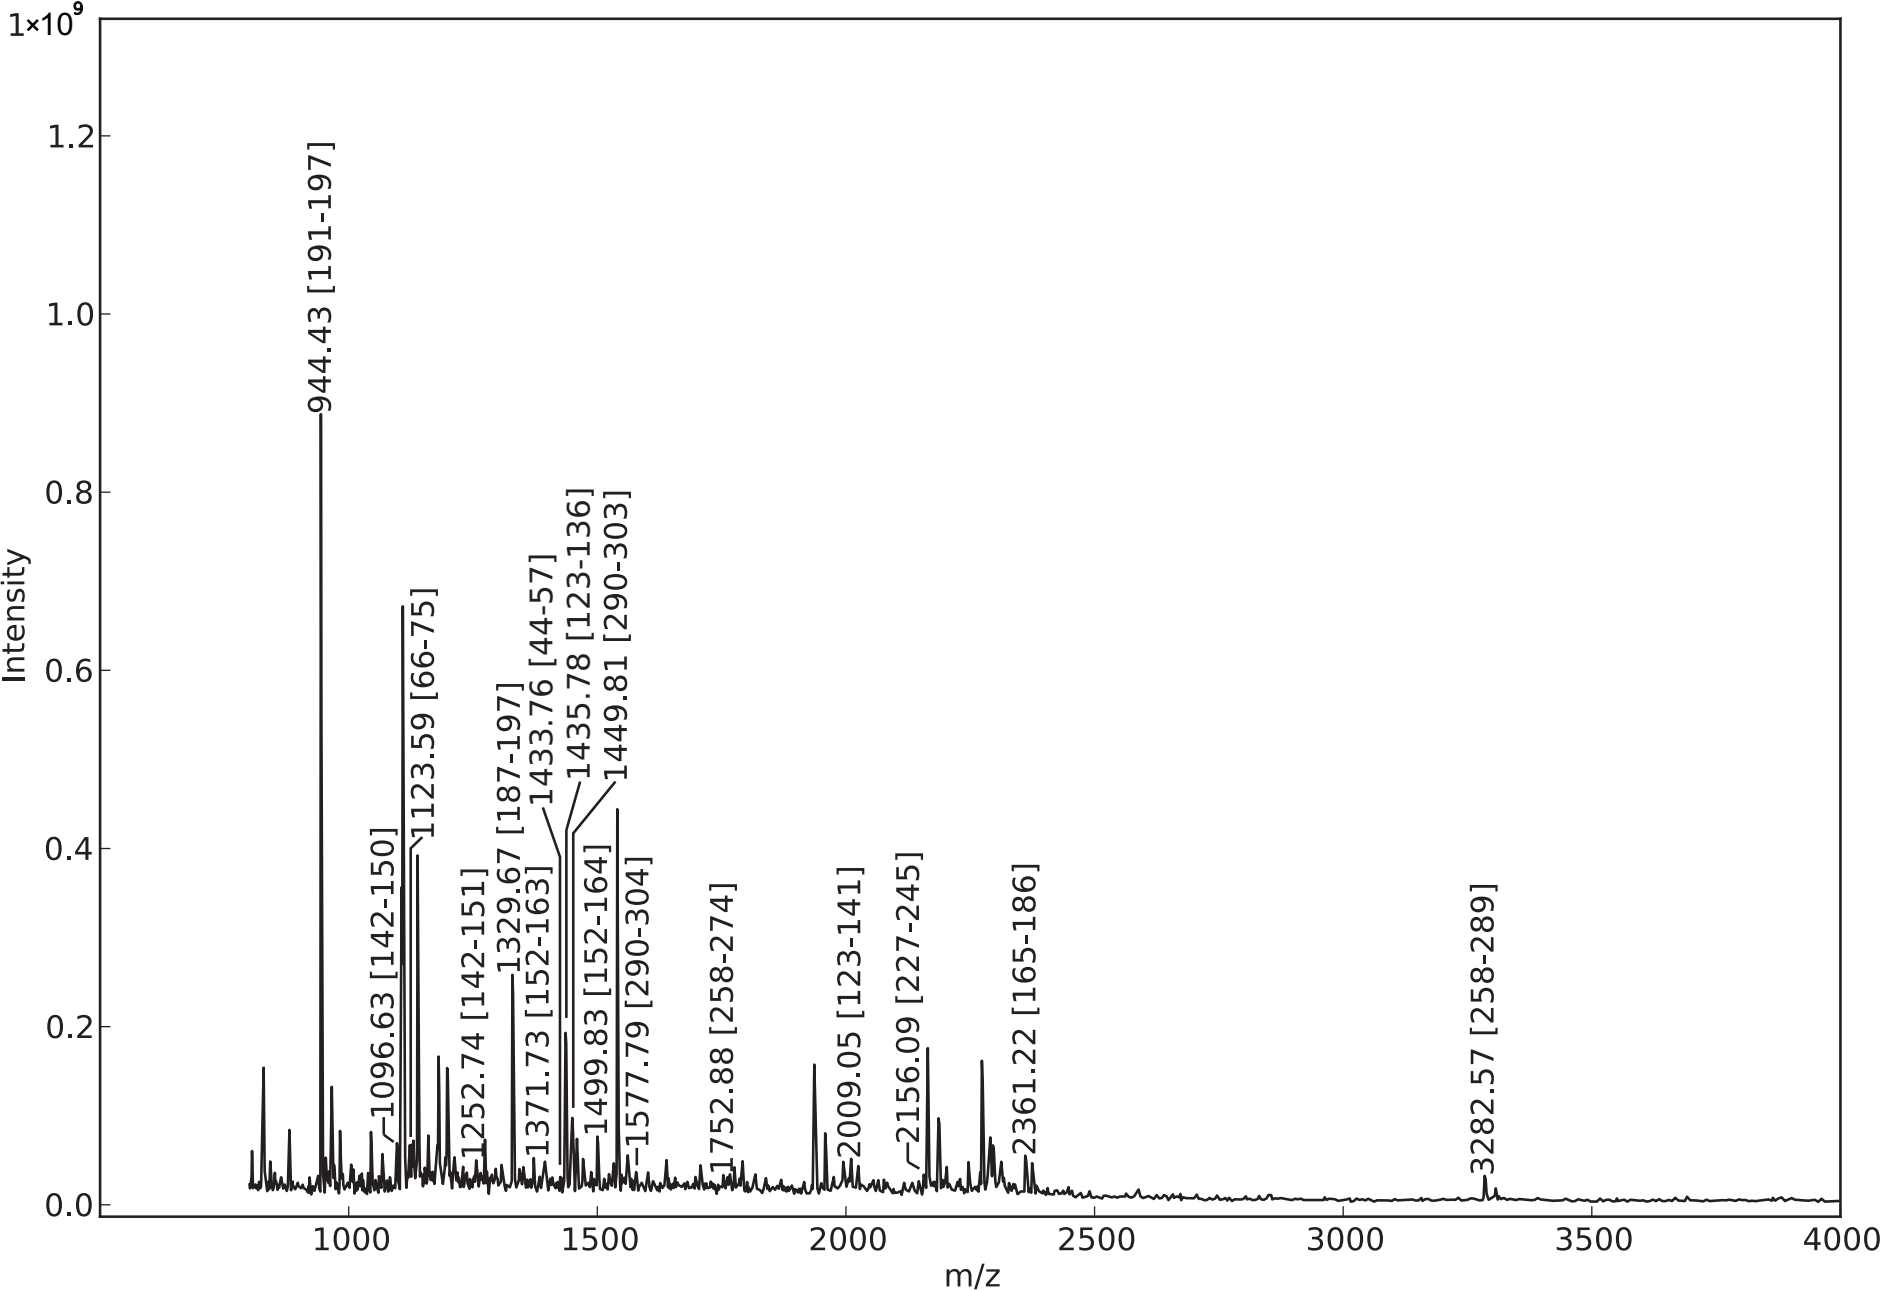

Spot No. 97

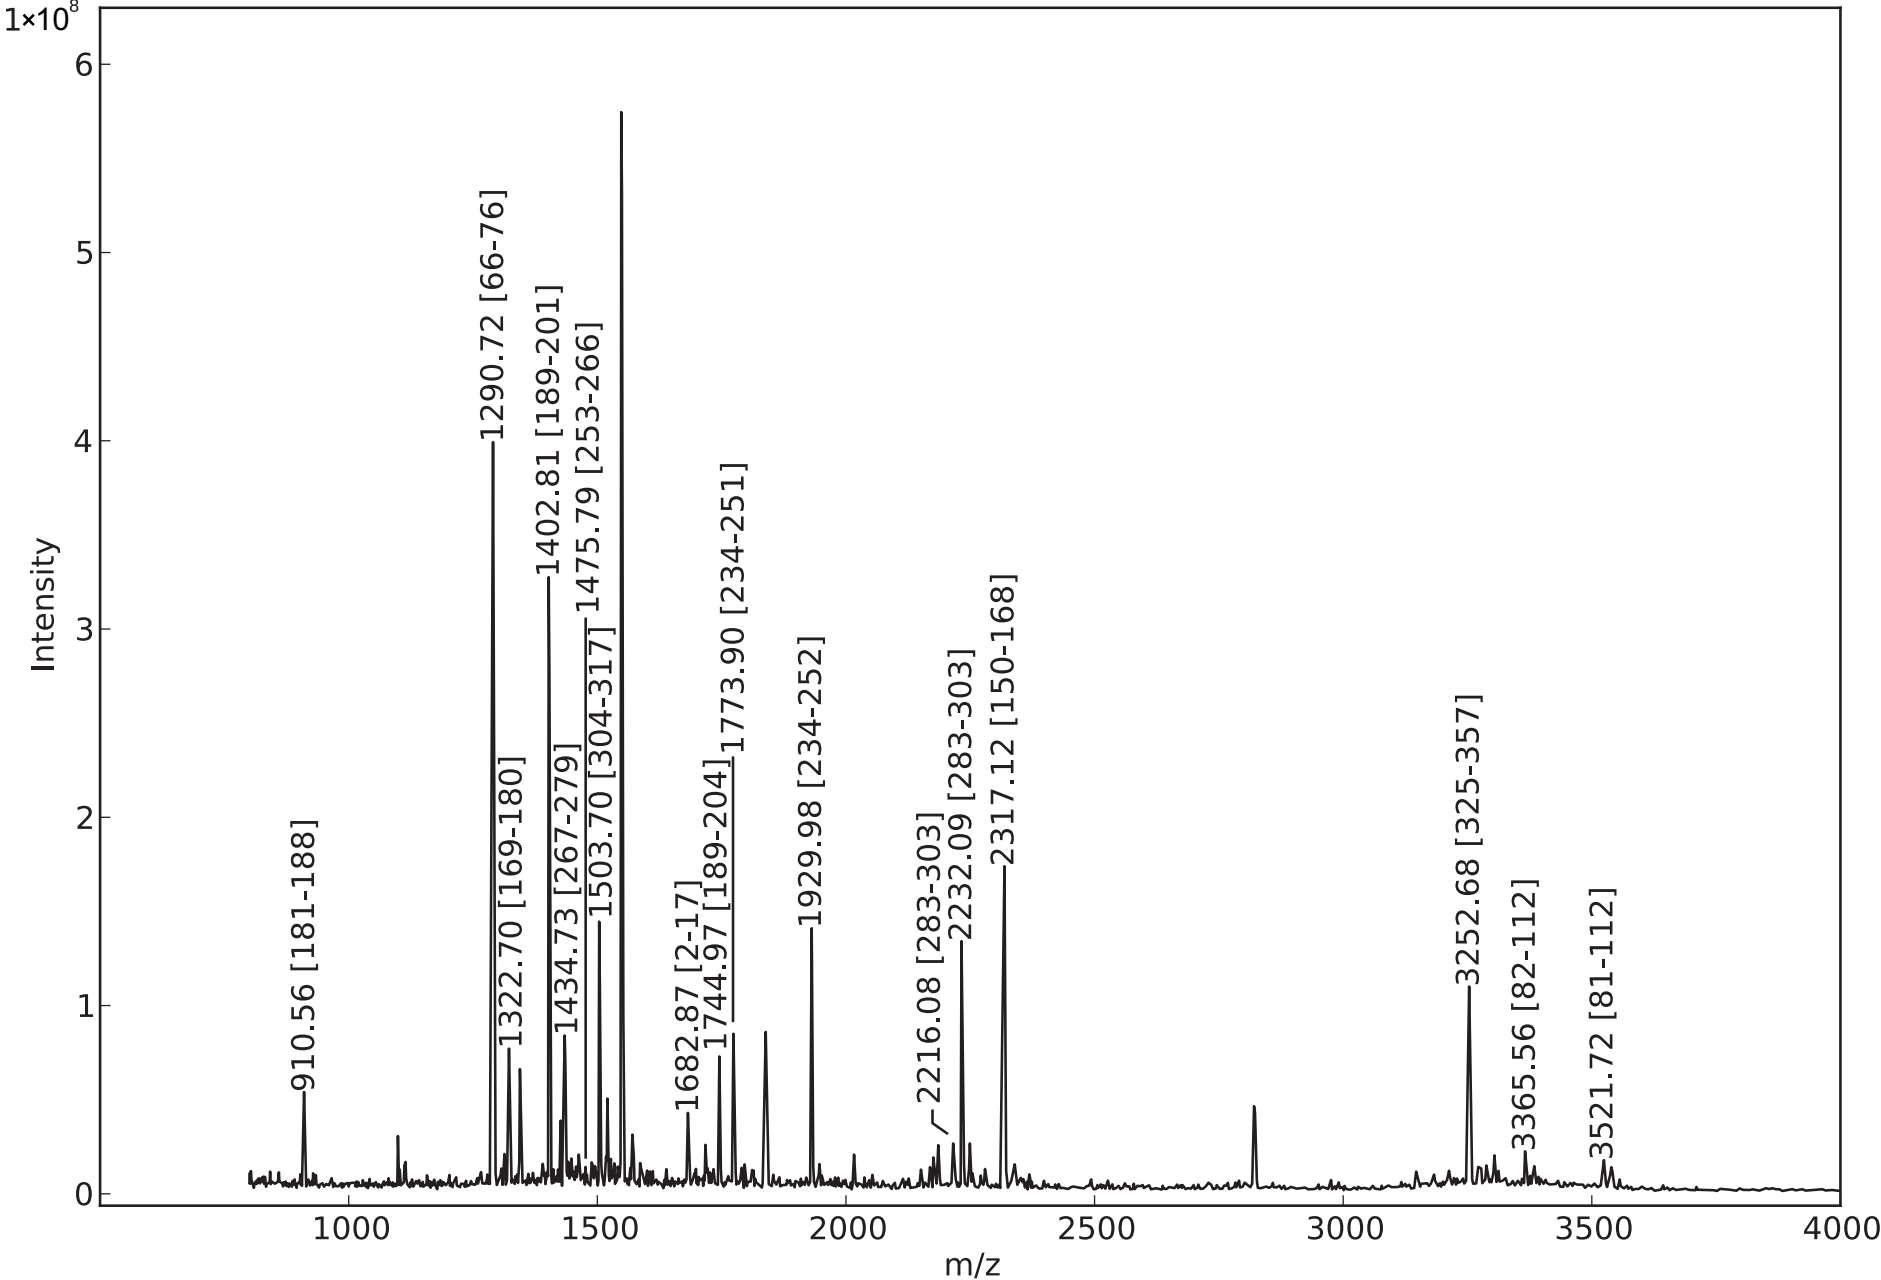

Spot No. 98

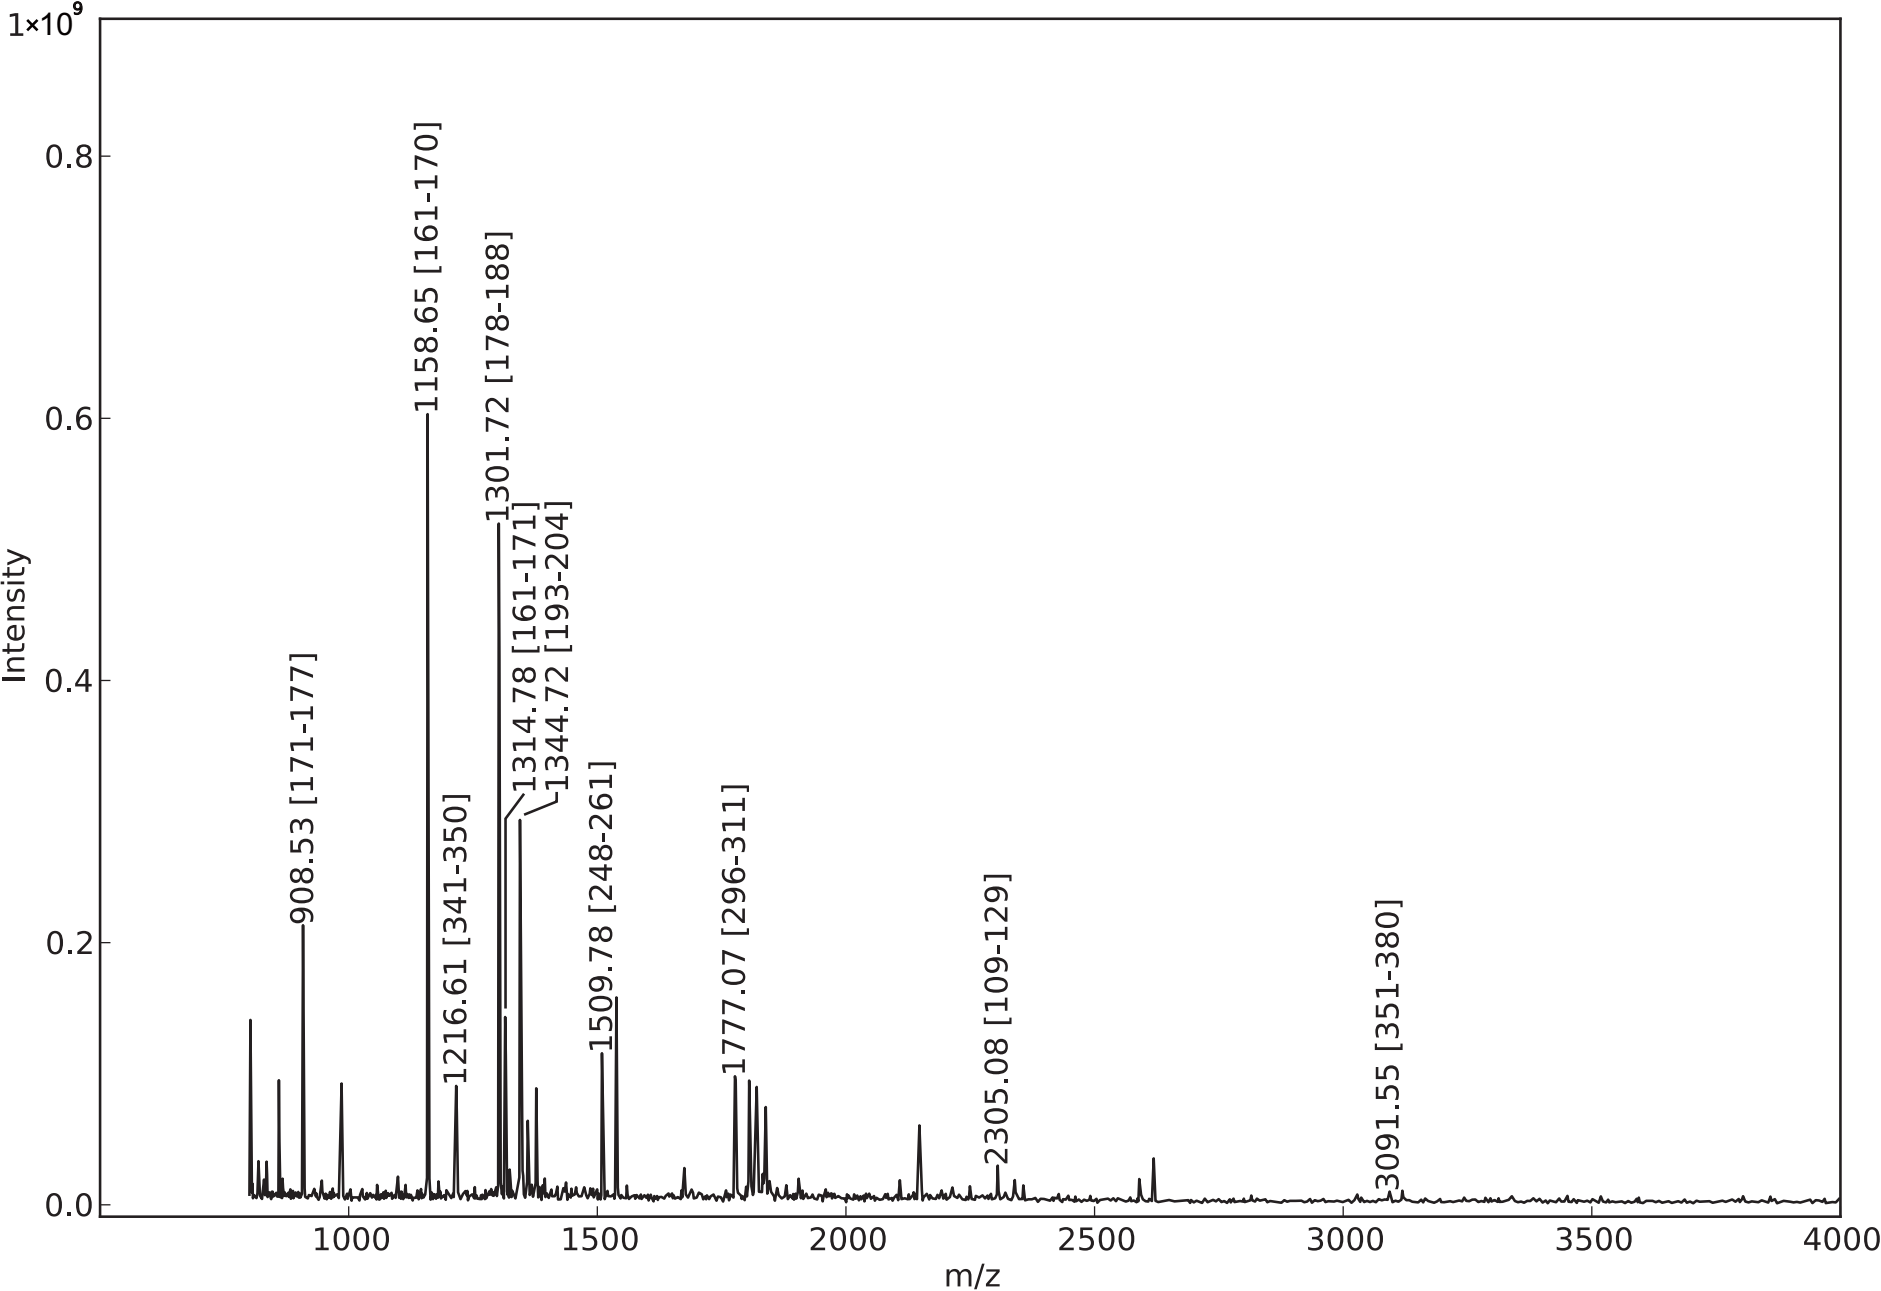

Spot No. 99

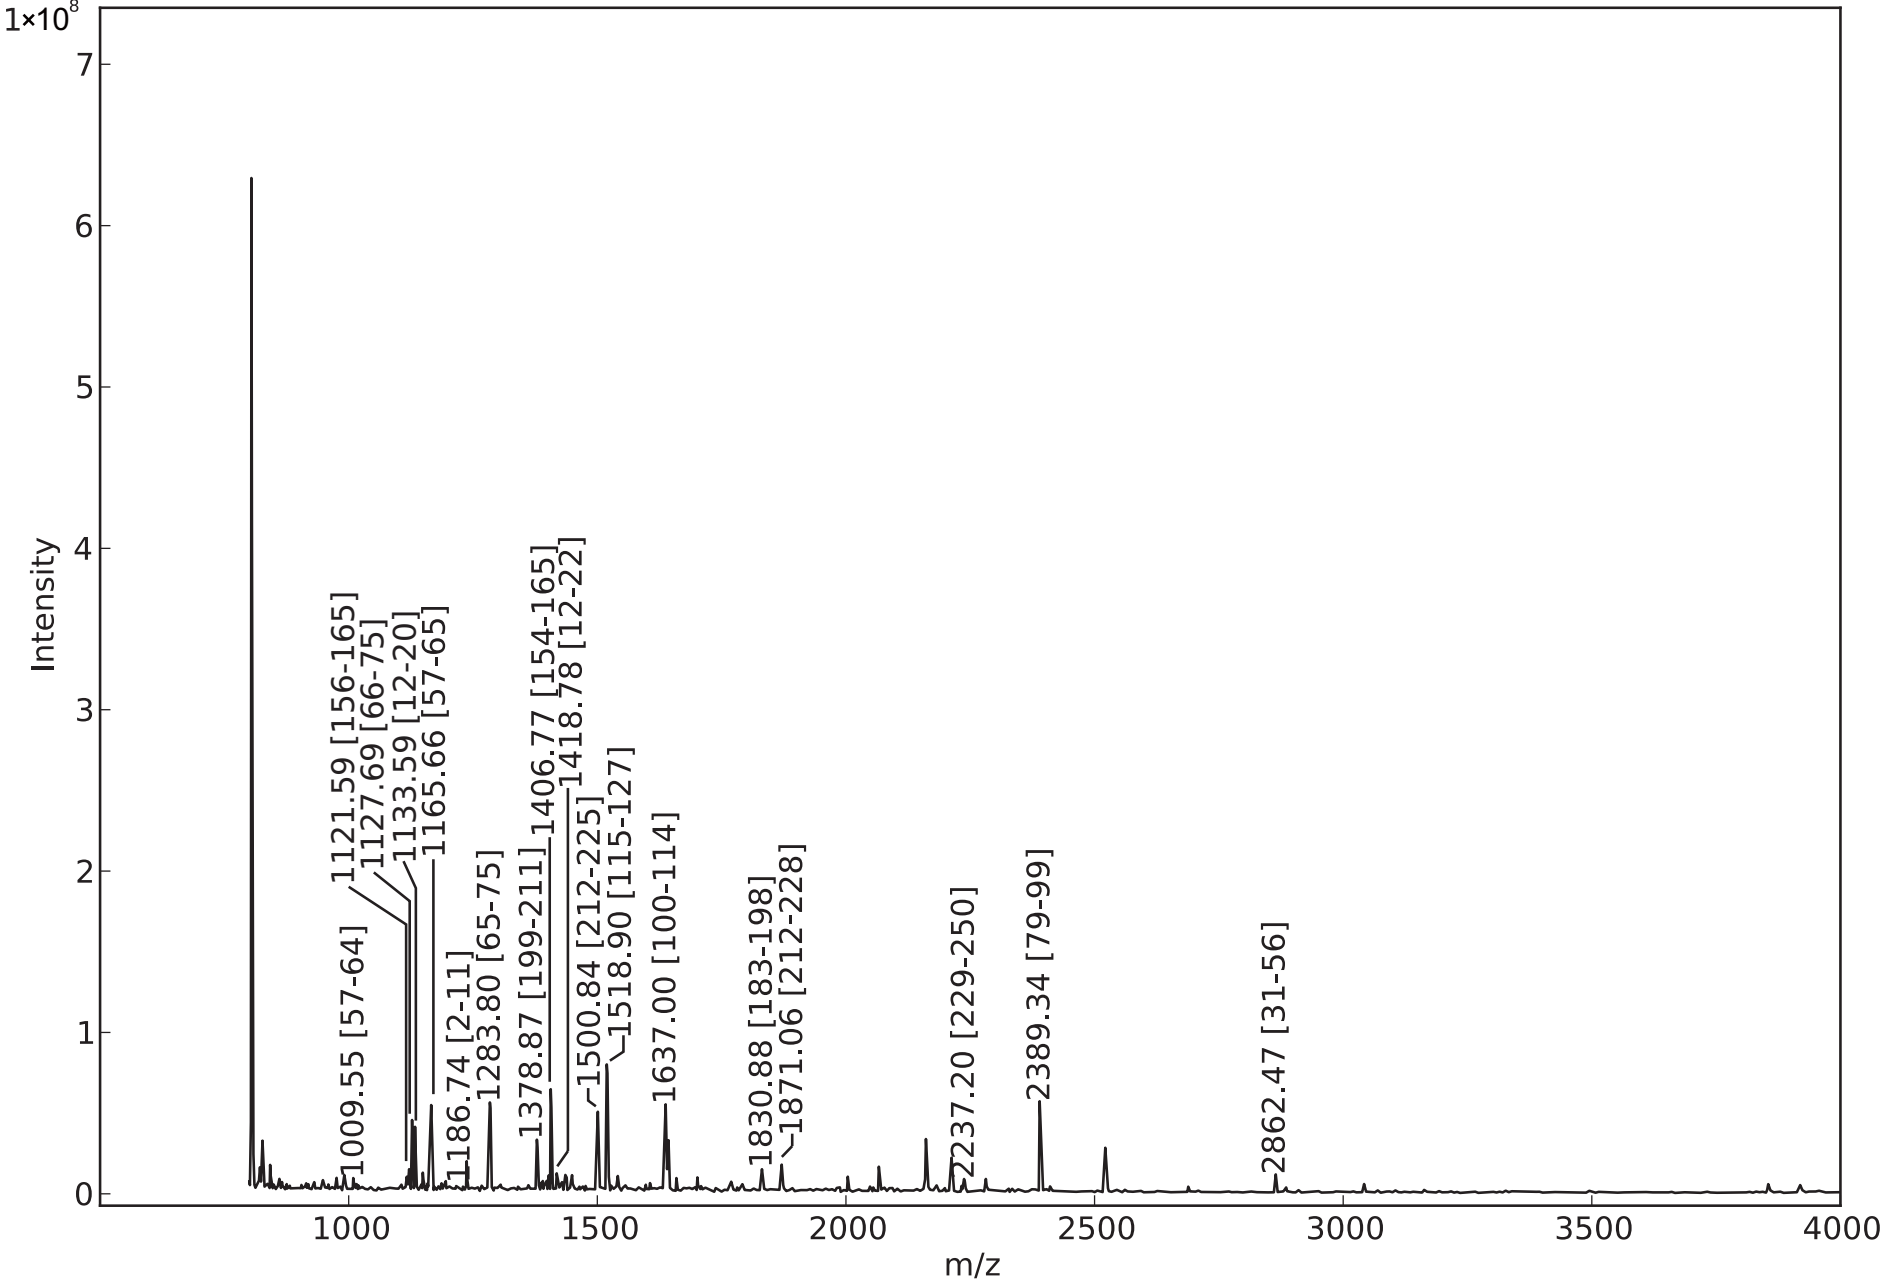

Spot No. 100

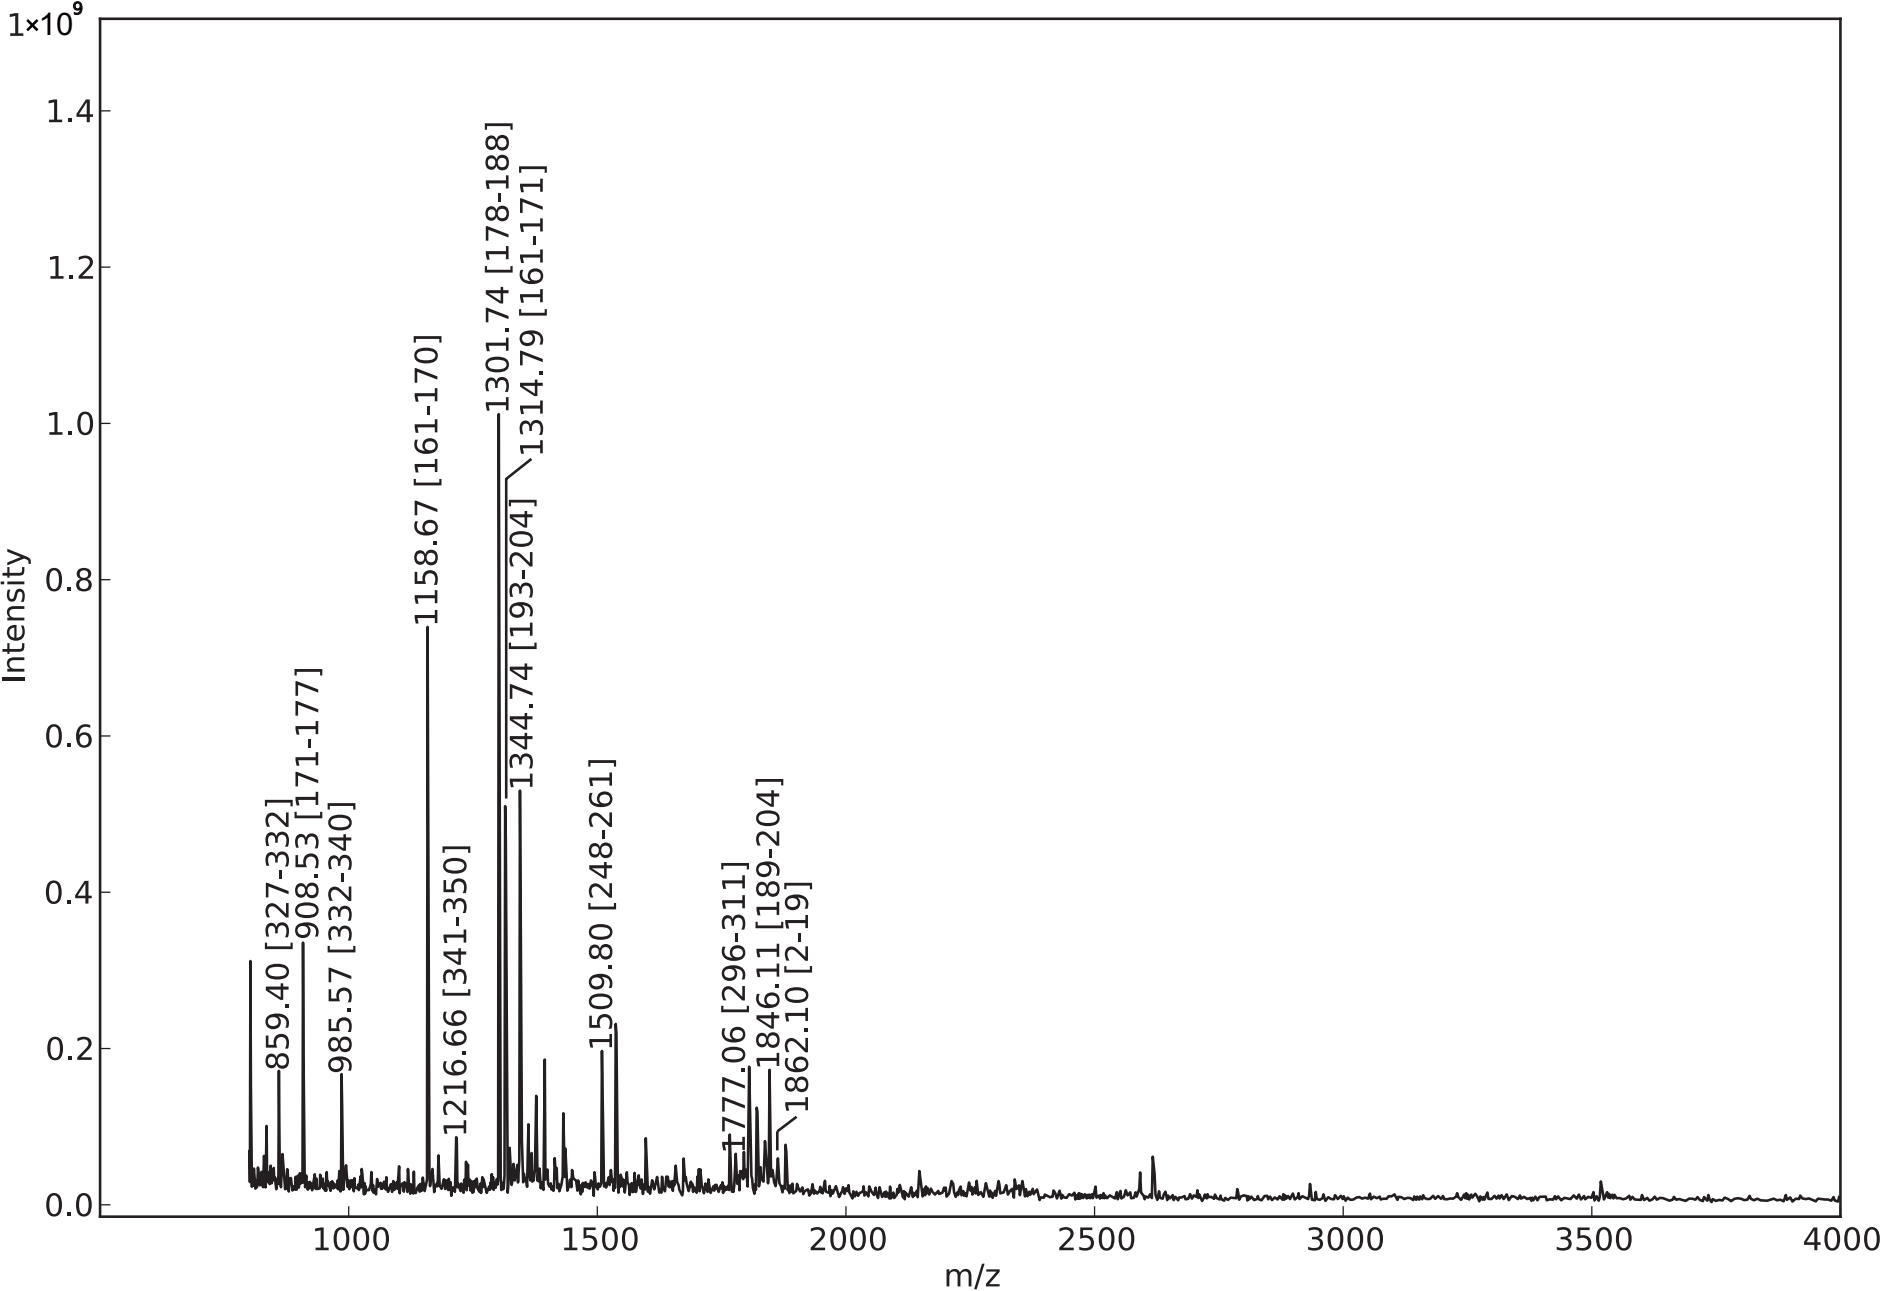

Spot No. 101

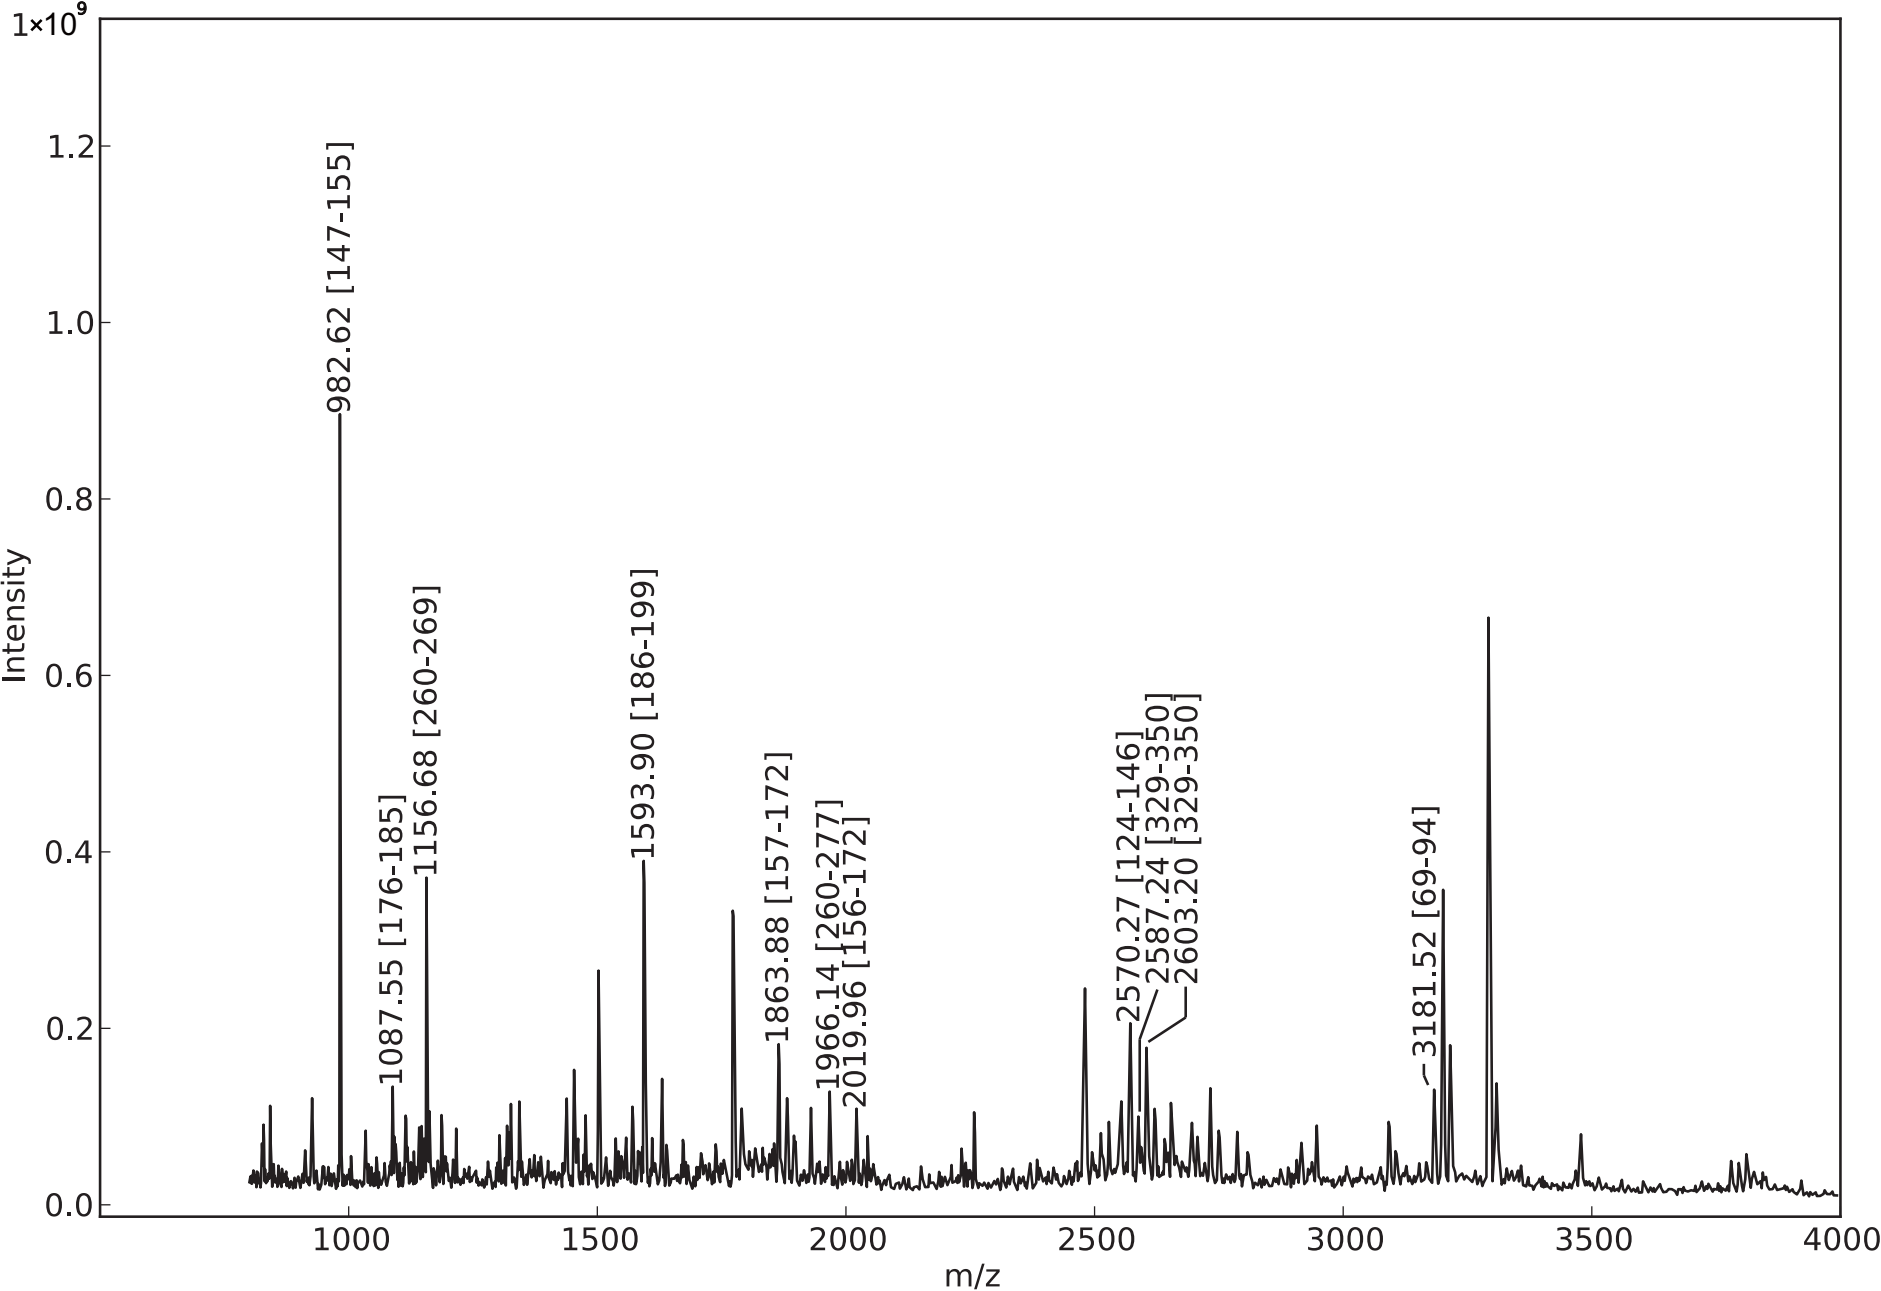

Spot No. 102

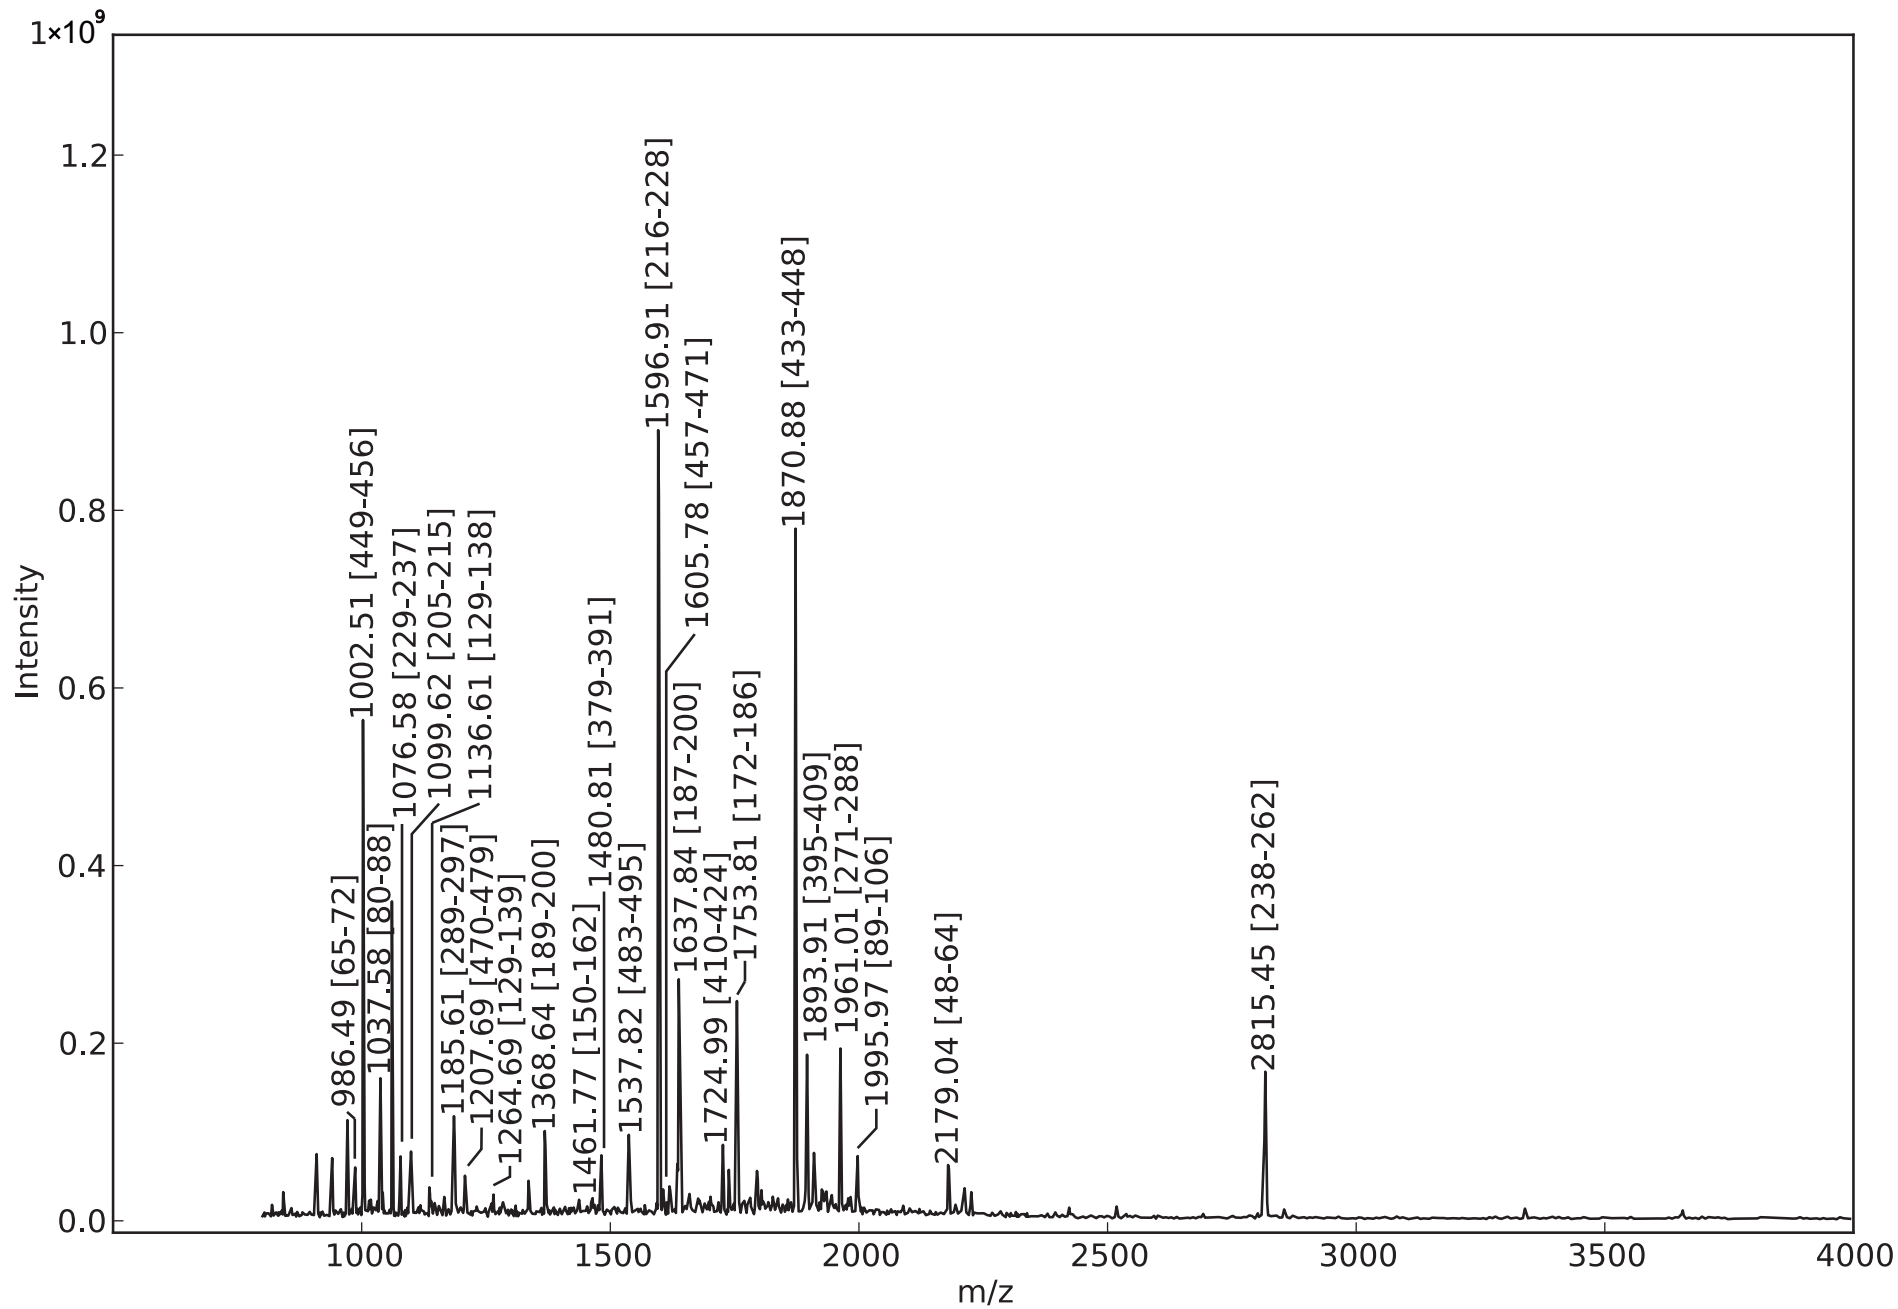



Spot No. 103

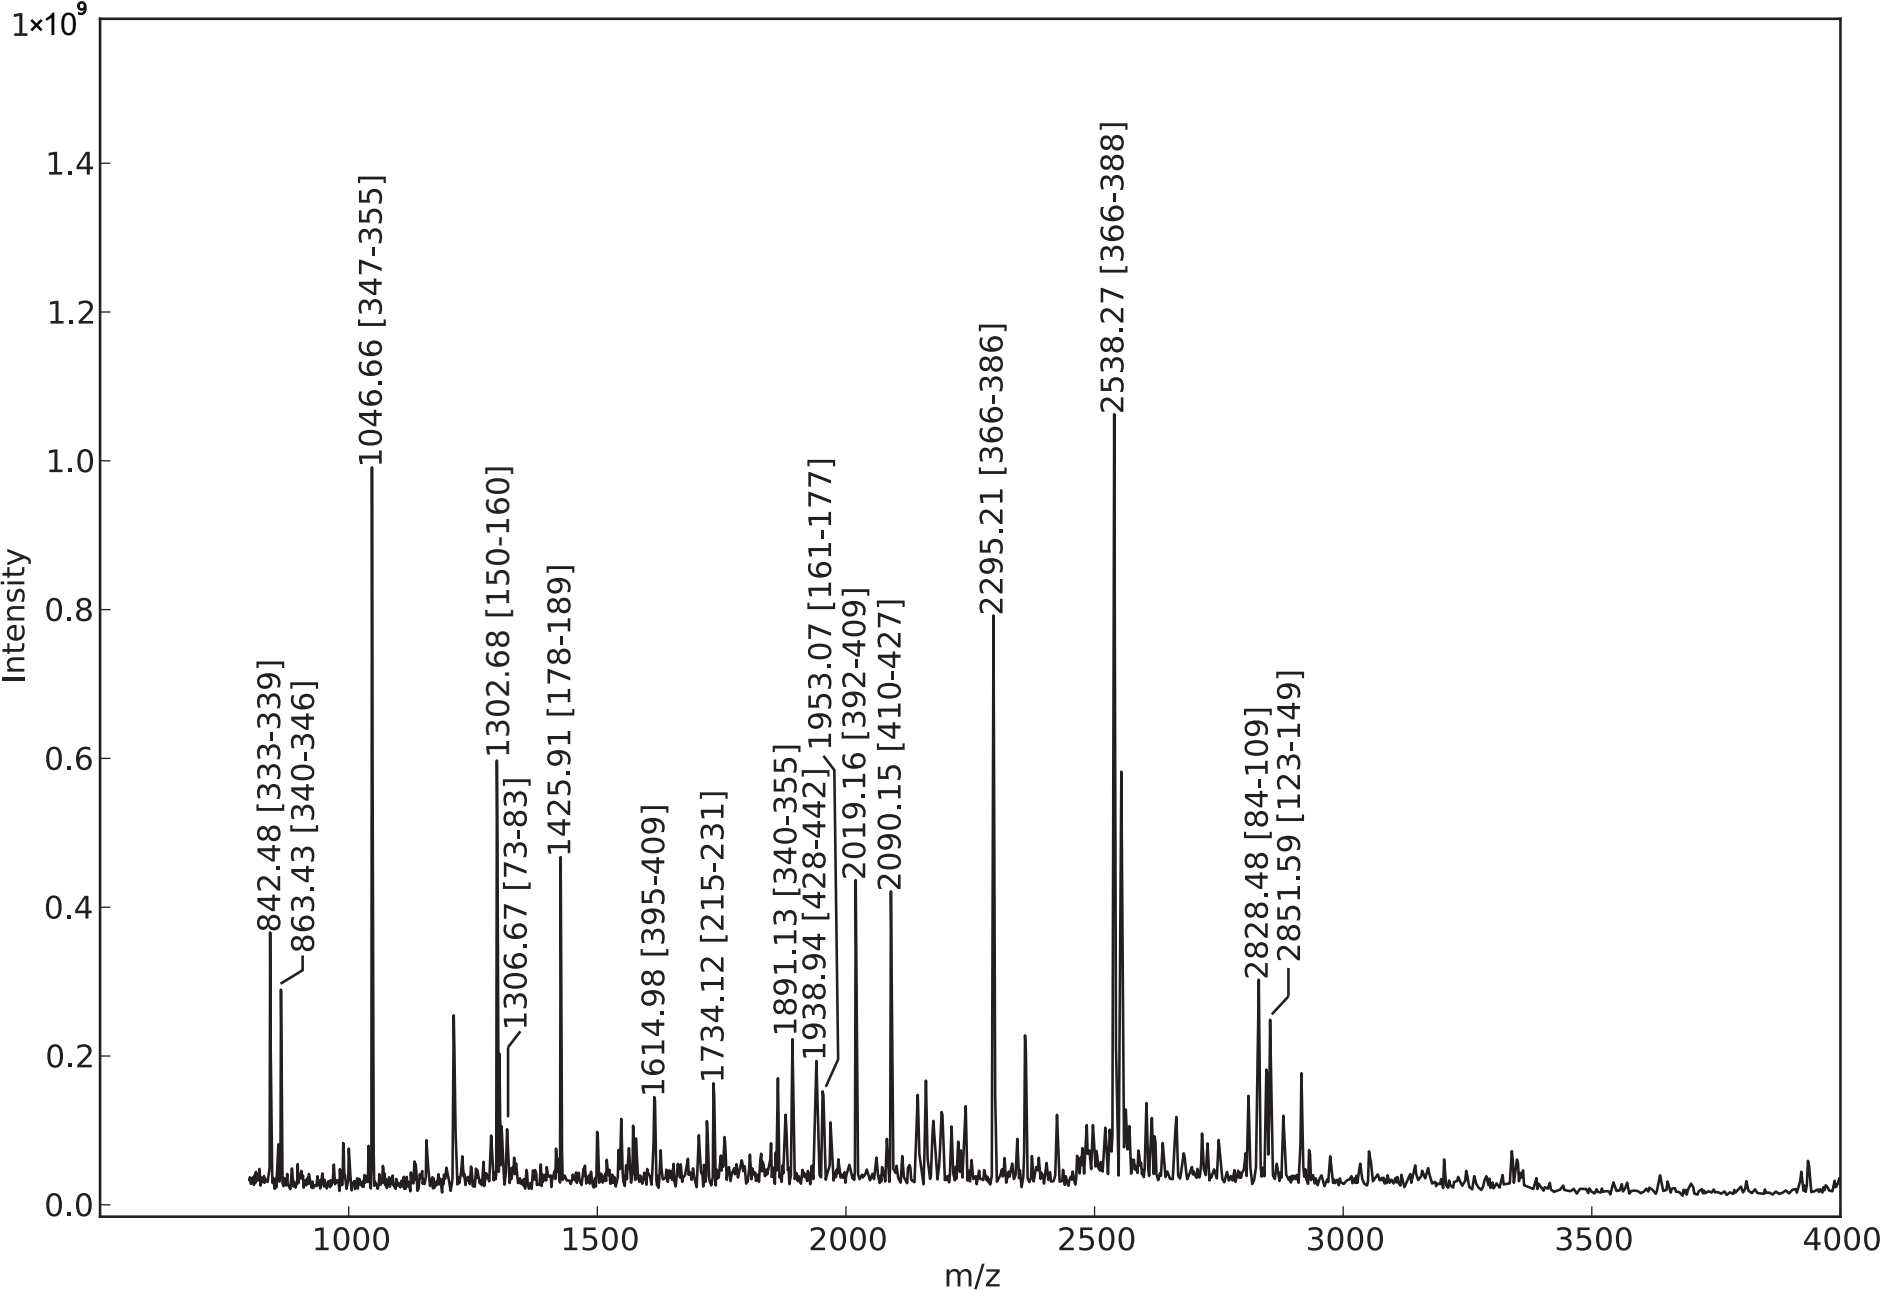

Spot No. 104

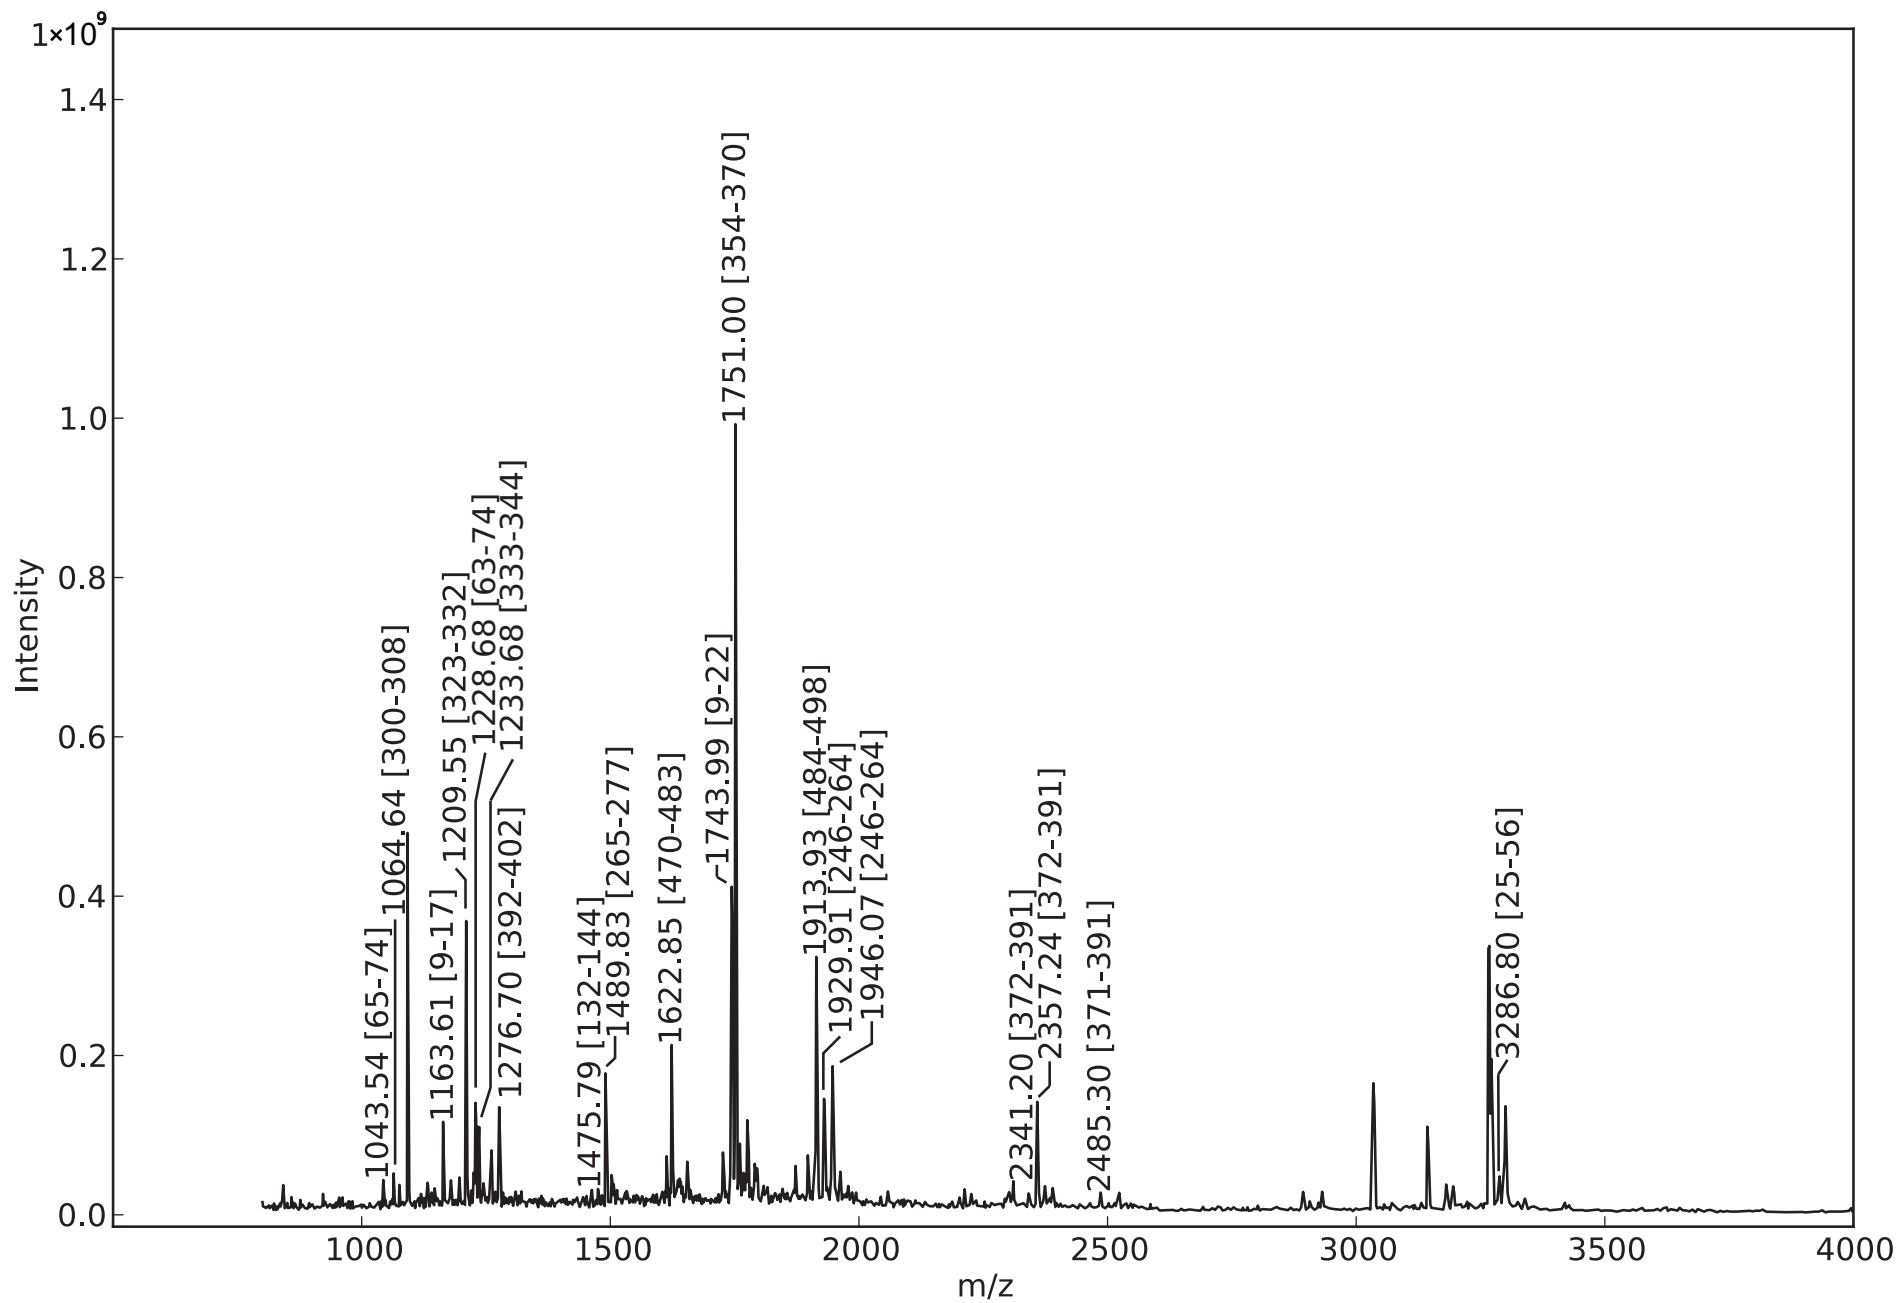

**Supplemental Spectra 2. All spectra from spot 32, 33, 79, 80, 78 and 83 were obtained by ESI-FTICR MS. All spectra from spot 81 were obtained by MALDI-TOF-TOF MS/MS.**

Gh UER1

Spot 32:

MS/MS Fragmentation of **TGWIGLLGK**  
Found in **DT545676**

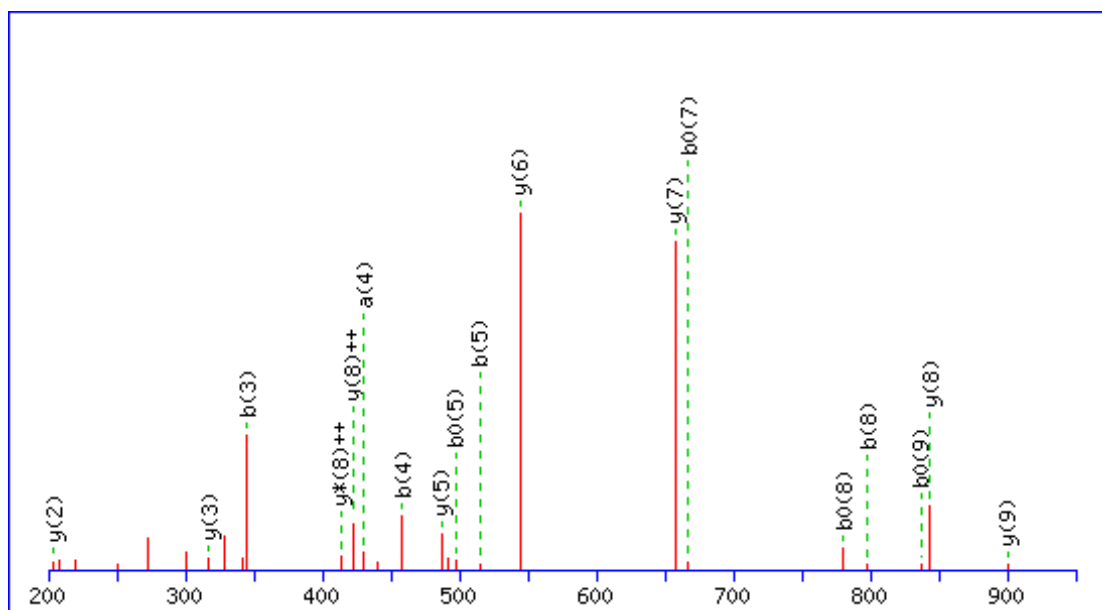

Precursor charge: 2+

Precursor m/z: 501.294986

Monoisotopic mass of neutral peptide Mr(calc): 1000.57

Fixed modifications: Carbamidomethyl (C)

Ions Score: 60 Expect: 0.00014

Matches (**Bold Red**): 18/108 fragment ions using 25 most intense peaks

MS/MS Fragmentation of **TNVVGTLLADVCR**

Found in **DT545676**

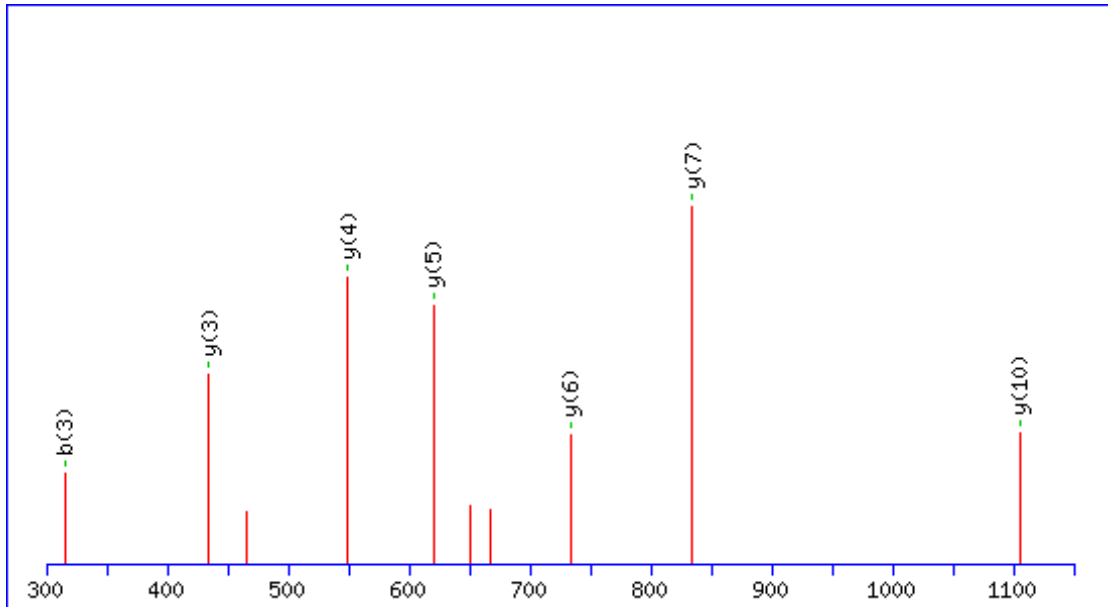

Precursor charge: 2+

Precursor m/z: 759.903082

Monoisotopic mass of neutral peptide Mr(calc): 1517.79

Fixed modifications: Carbamidomethyl (C)

Ions Score: 61 Expect: 0.00012

Matches (**Bold Red**): 7/200 fragment ions using 7 most intense peaks

MS/MS Fragmentation of **MPISSDLANPR**

Found in **DT545676**

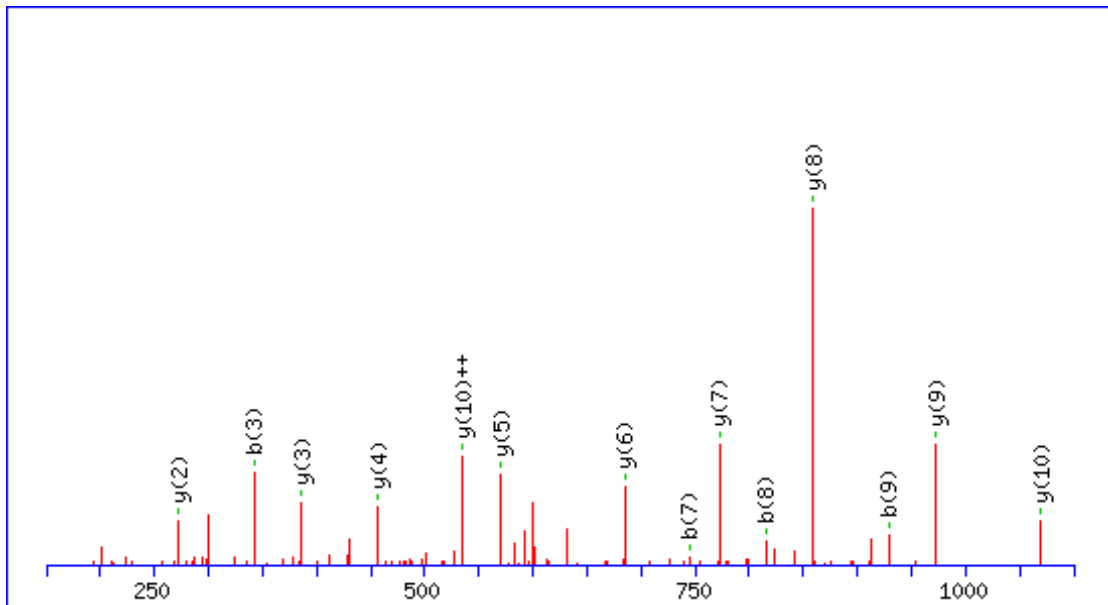

Precursor charge: 2+

Precursor m/z: 600.802804

Monoisotopic mass of neutral peptide Mr(calc): 1199.60

Fixed modifications: Carbamidomethyl (C)

Ions Score: 92 Expect: 1.1e-007

Matches (**Bold Red**): 14/128 fragment ions using 18 most intense peaks

MS/MS Fragmentation of **MPISSDLANPR**

Found in **DT545676**

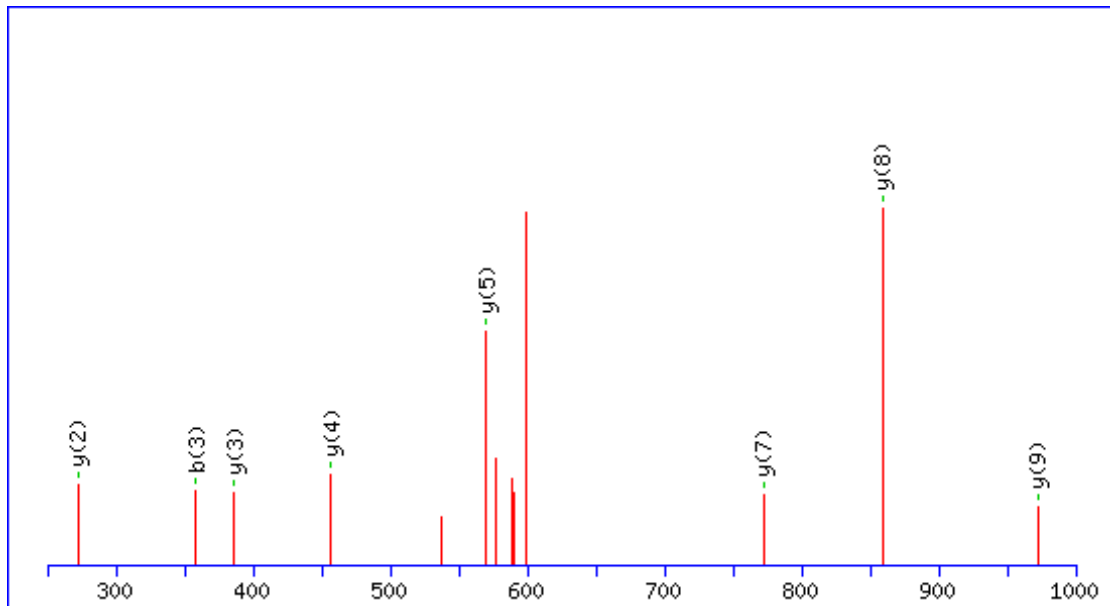

Precursor charge: 2+

Precursor m/z: 608.803327

Monoisotopic mass of neutral peptide Mr(calc): 1215.59

Fixed modifications: Carbamidomethyl (C)

Variable modifications:

M1 : Oxidation (M)

Ions Score: 67 Expect: 2.5e-005

Matches (**Bold Red**): 8/128 fragment ions using 11 most intense peaks

MS/MS Fragmentation of **DYIDPNFTWK**

Found in **DT545676**

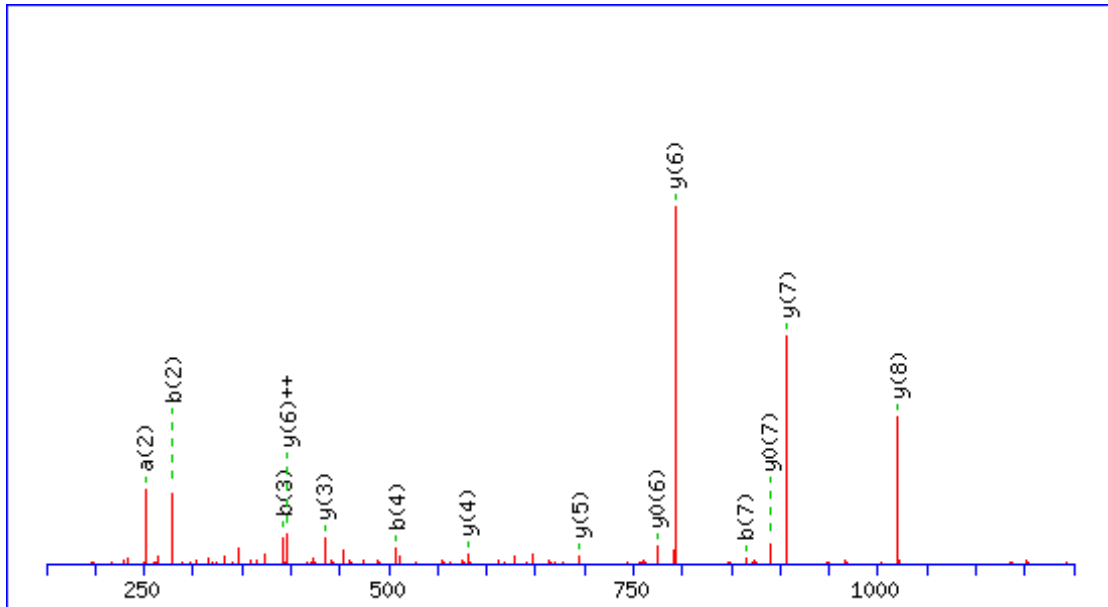

Precursor charge: 2+

Precursor m/z: 649.806700

Monoisotopic mass of neutral peptide Mr(calc): 1297.60

Fixed modifications: Carbamidomethyl (C)

Ions Score: 44 Expect: 0.0041

Matches (**Red**): 14/130 fragment ions using 21 most intense peaks

MS/MS Fragmentation of **NFNLEEQA**K

Found in **DT545676**

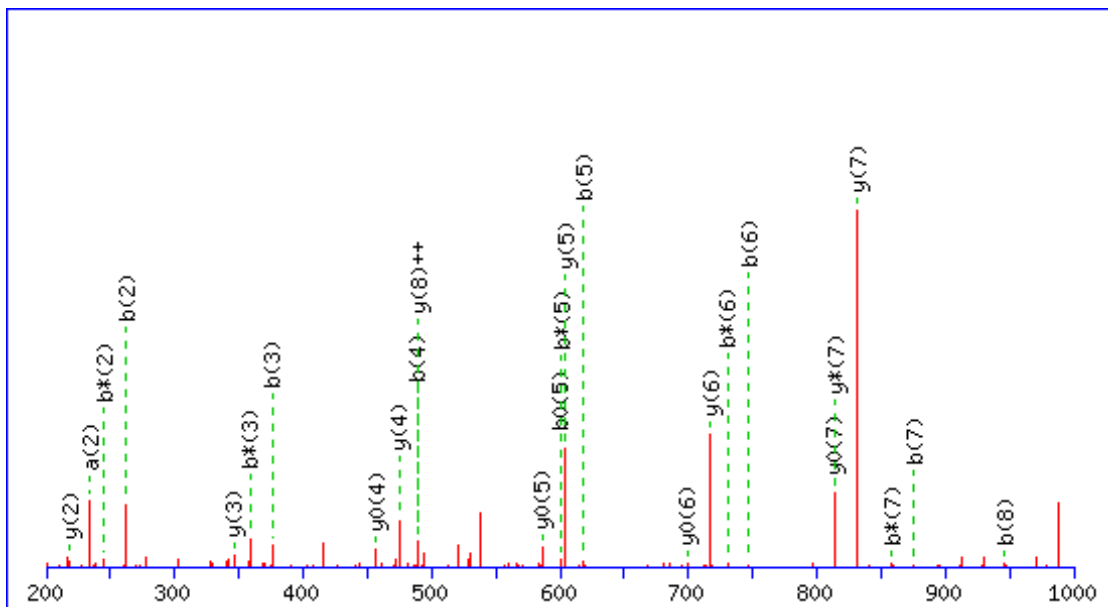

Precursor charge: 2+

Precursor m/z: 546.767838

Monoisotopic mass of neutral peptide Mr(calc): 1091.52

Fixed modifications: Carbamidomethyl (C)

Ions Score: 46 Expect: 0.0051

Matches (**Bold Red**): 26/114 fragment ions using 48 most intense peaks

MS/MS Fragmentation of **SNNELDATK**

Found in **DT545676**

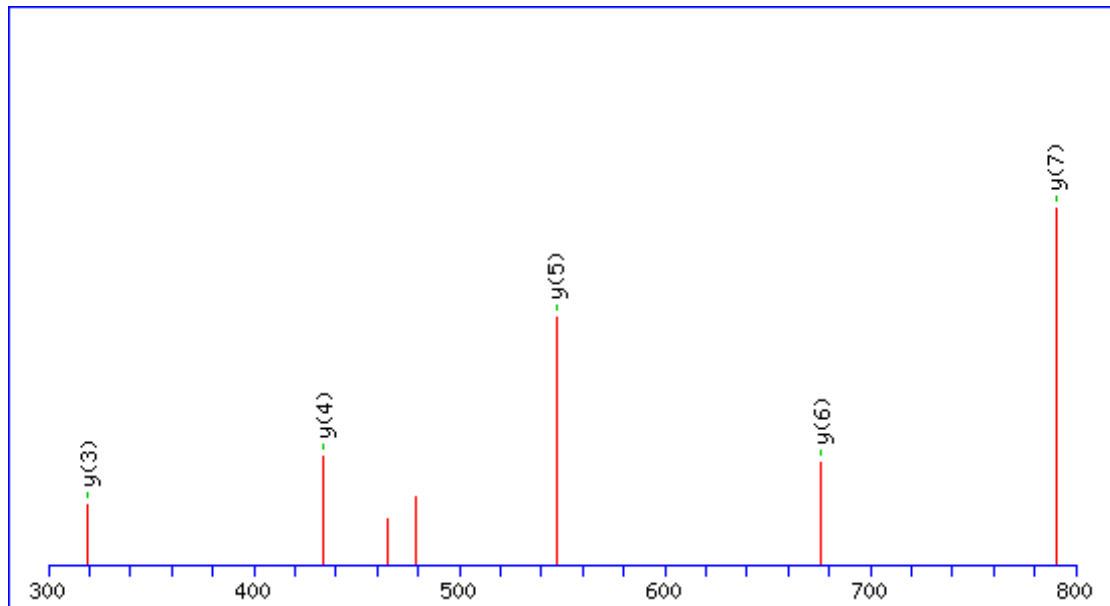

Precursor charge: 2+

Precursor m/z: 496.240565

Monoisotopic mass of neutral peptide Mr(calc): 990.46

Fixed modifications: Carbamidomethyl (C)

Ions Score: 54 Expect: 0.00071

Matches (**Bold Red**): 5/124 fragment ions using 5 most intense peaks

MS/MS Fragmentation of **TEFPELLSIK**

Found in **DT545676**

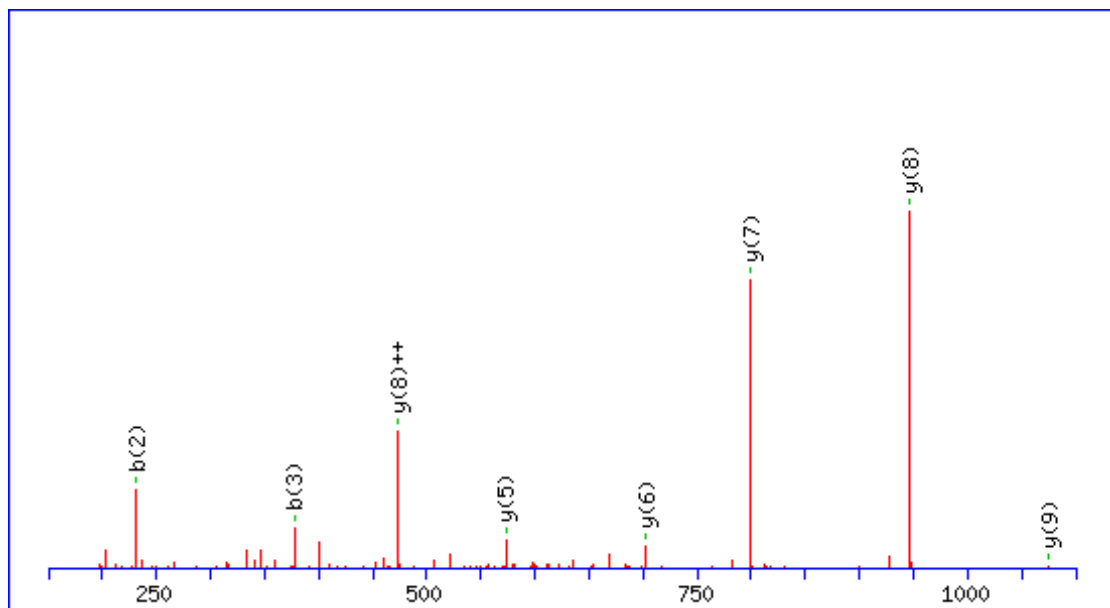

Precursor charge: 2+

Precursor m/z: 588.828849

Monoisotopic mass of neutral peptide Mr(calc): 1175.64

Fixed modifications: Carbamidomethyl (C)

Ions Score: 46 Expect: 0.0041

Matches (**Bold Red**): 8/122 fragment ions using 12 most intense peaks

Spot 33

MS/MS Fragmentation of **TGWIGLLGK**

Found in **DT545676**

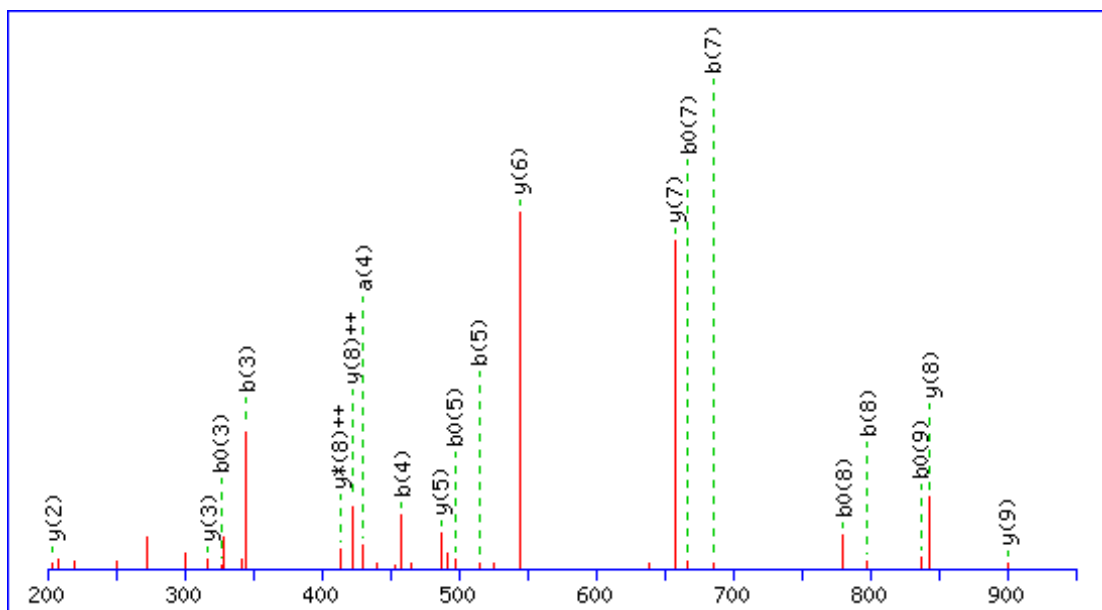

Precursor charge: 2+

Precursor m/z: 501.294476

Monoisotopic mass of neutral peptide Mr(calc): 1000.57

Fixed modifications: Carbamidomethyl (C)

Ions Score: 54 Expect: 0.00052

Matches (**Bold Red**): 20/108 fragment ions using 31 most intense peaks

MS/MS Fragmentation of **MPISSDLANPR**

Found in **DT545676**



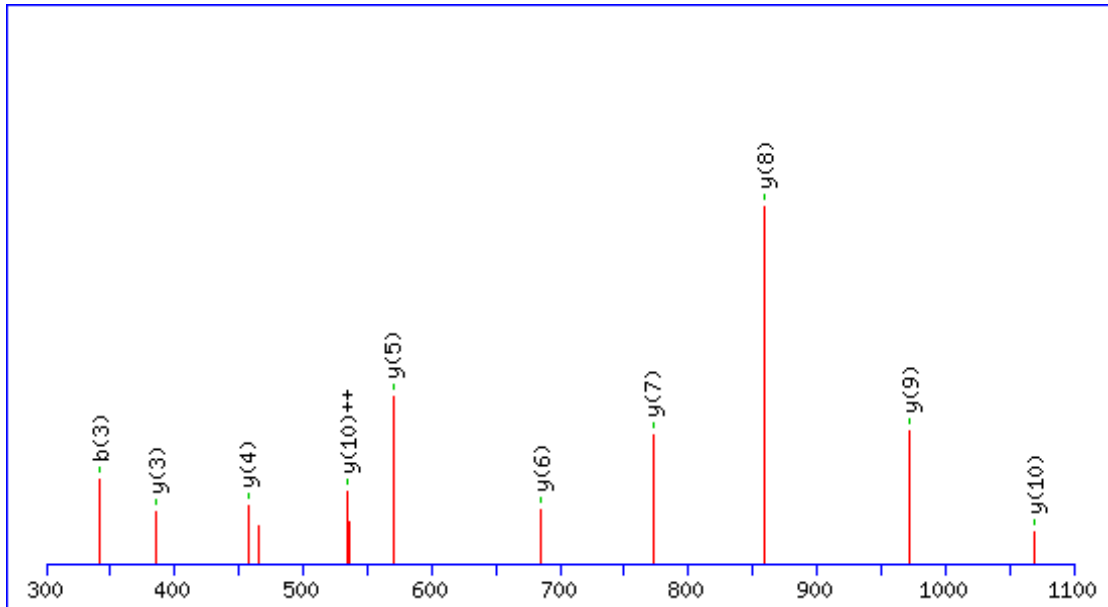

Precursor charge: 2+

Precursor m/z: 600.808537

Monoisotopic mass of neutral peptide Mr(calc): 1199.60

Fixed modifications: Carbamidomethyl (C)

Ions Score: 93 Expect: 9.7e-008

Matches (**Bold Red**): 10/128 fragment ions using 10 most intense peaks

MS/MS Fragmentation of **MPISSDLANPR**

Found in **DT545676**

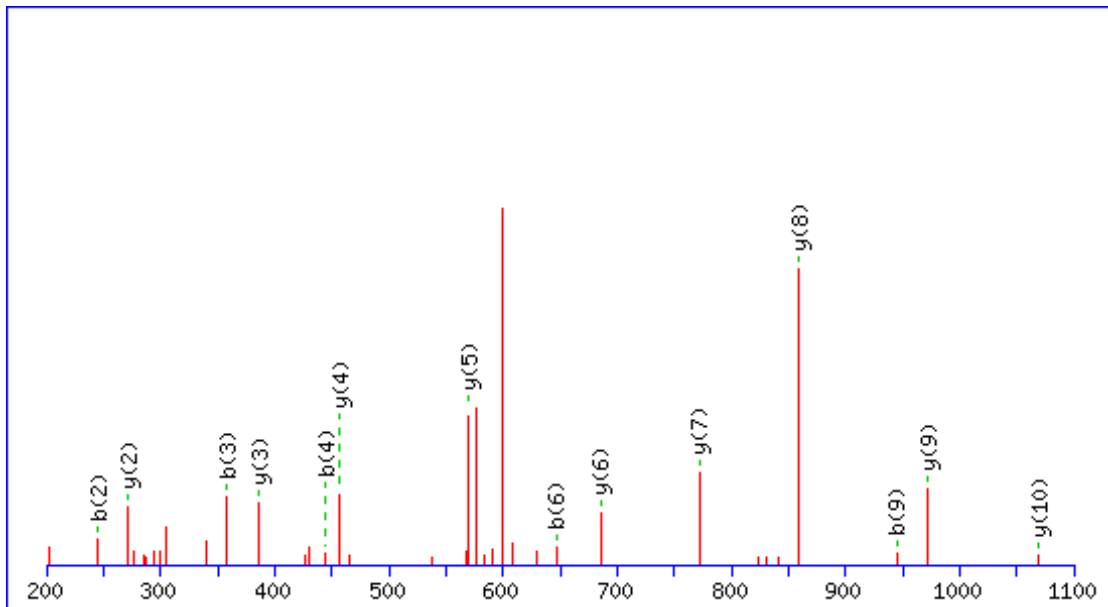

Precursor charge: 2+

Precursor m/z: 608.803613

Monoisotopic mass of neutral peptide Mr(calc): 1215.59

Fixed modifications: Carbamidomethyl (C)

Variable modifications:

M1 : Oxidation (M)

Ions Score: 80 Expect: 1.3e-006

Matches (**Bold Red**): 14/128 fragment ions using 22 most intense peaks

MS/MS Fragmentation of **SNNELDATK**

Found in **DT545676**

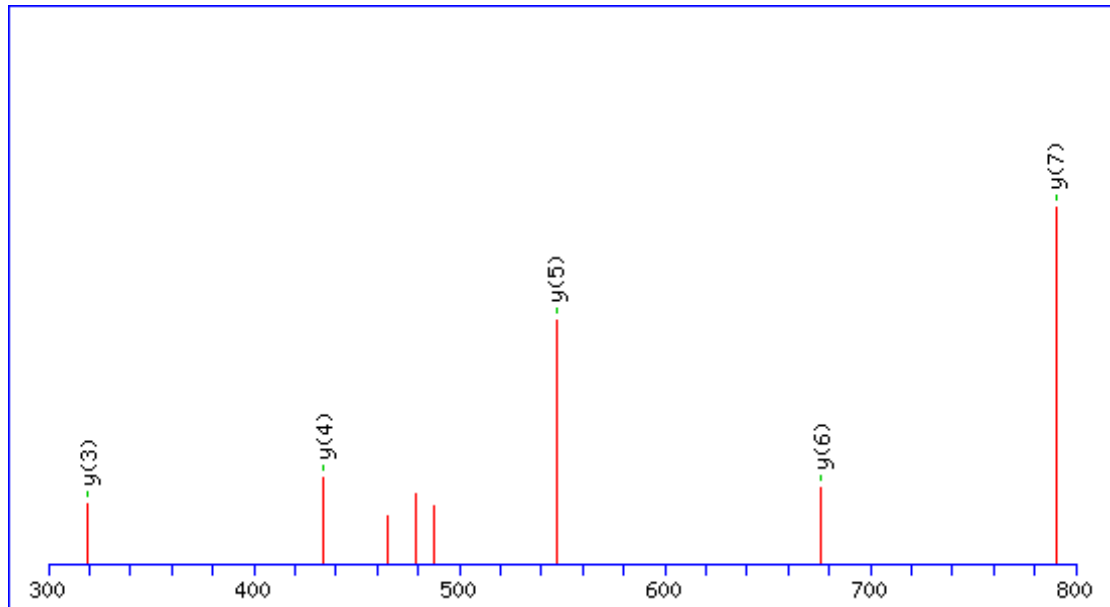

Precursor charge: 2+

Precursor m/z: 496.239682

Monoisotopic mass of neutral peptide Mr(calc): 990.46

Fixed modifications: Carbamidomethyl (C)

Ions Score: 54 Expect: 0.0006

Matches (**Bold Red**): 5/124 fragment ions using 5 most intense peaks

Gh UGP1

Spot79

MS/MS Fragmentation of **LVAEDFTPFCK**

Found in **C0109041**

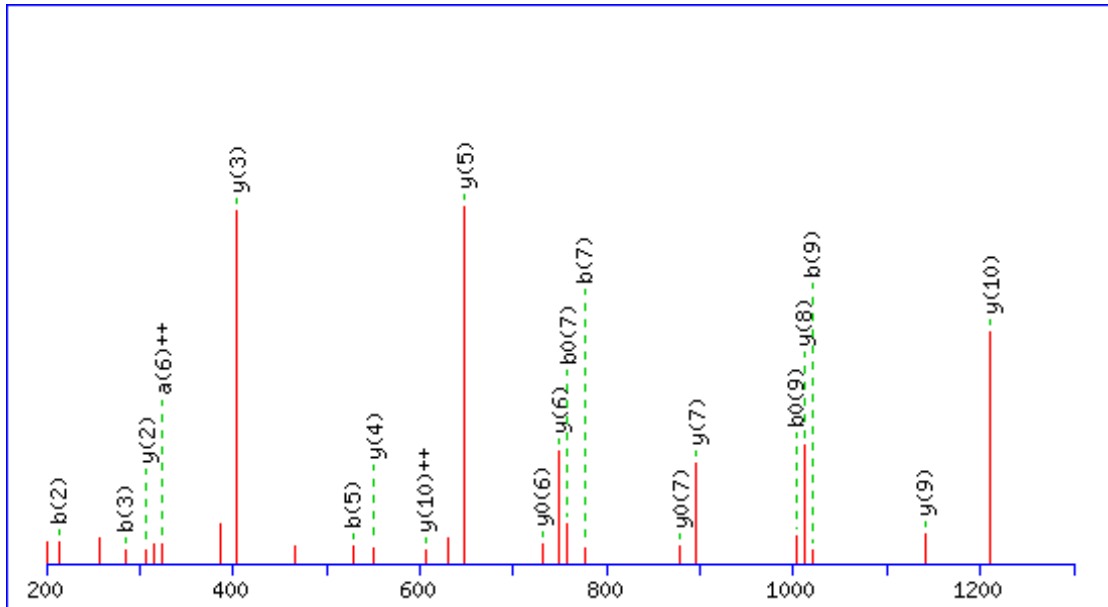

Precursor charge: 2+

Precursor m/z: 712.352879

Monoisotopic mass of neutral peptide Mr(calc): 1422.69

Fixed modifications: Carbamidomethyl (C)

Ions Score: 75 Expect: 4.7e-006

Matches (**Red**): 20/138 fragment ions using 28 most intense peaks

MS/MS Fragmentation of **MEIIPNPK**

Found in **C0109041**

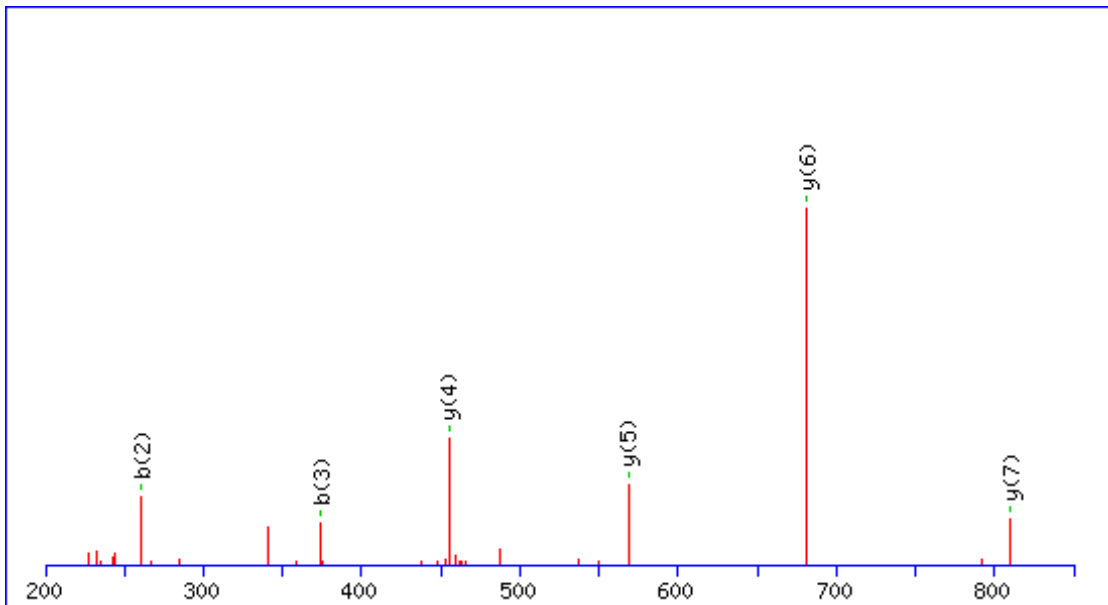

Precursor charge: 2+

Precursor m/z: 471.260945

Monoisotopic mass of neutral peptide Mr(calc): 940.51

Fixed modifications: Carbamidomethyl (C)

Ions Score: 41 Expect: 0.0077

Matches (**Bold Red**): 6/88 fragment ions using 6 most intense peaks

MS/MS Fragmentation of **VSNFLSR**

Found in **C0109041**

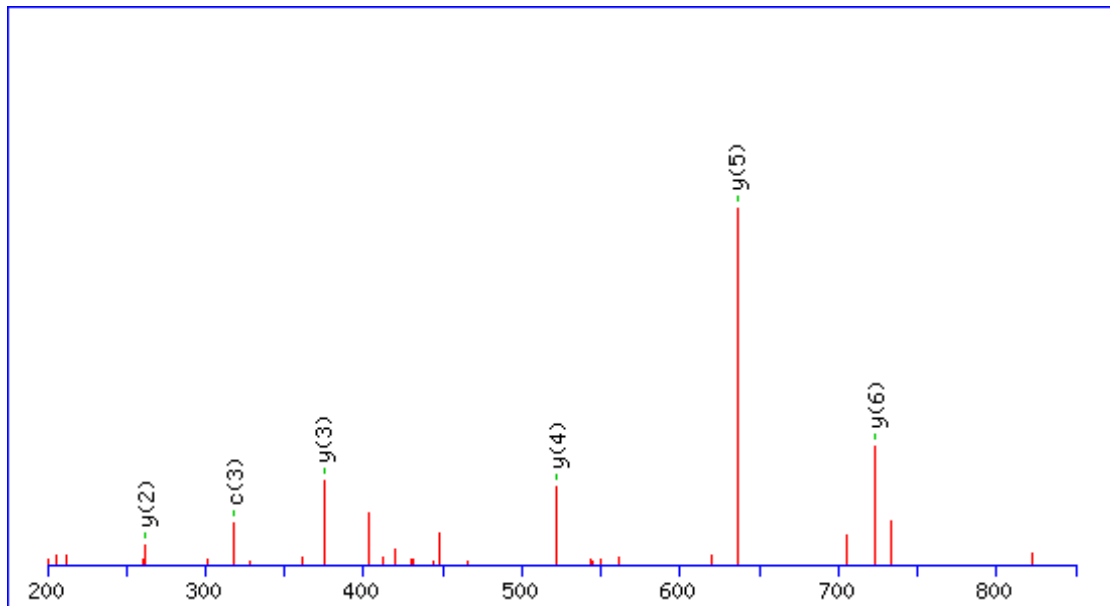

Precursor charge: 2+

Precursor m/z: 411.728469

Monoisotopic mass of neutral peptide Mr(calc): 821.44

Fixed modifications: Carbamidomethyl (C)

Ions Score: 55 Expect: 0.00094

Matches (**Bold Red**): 6/88 fragment ions using 7 most intense peaks

Spot 80

MS/MS Fragmentation of **MEIIPNPK**

Found in **ES824132**

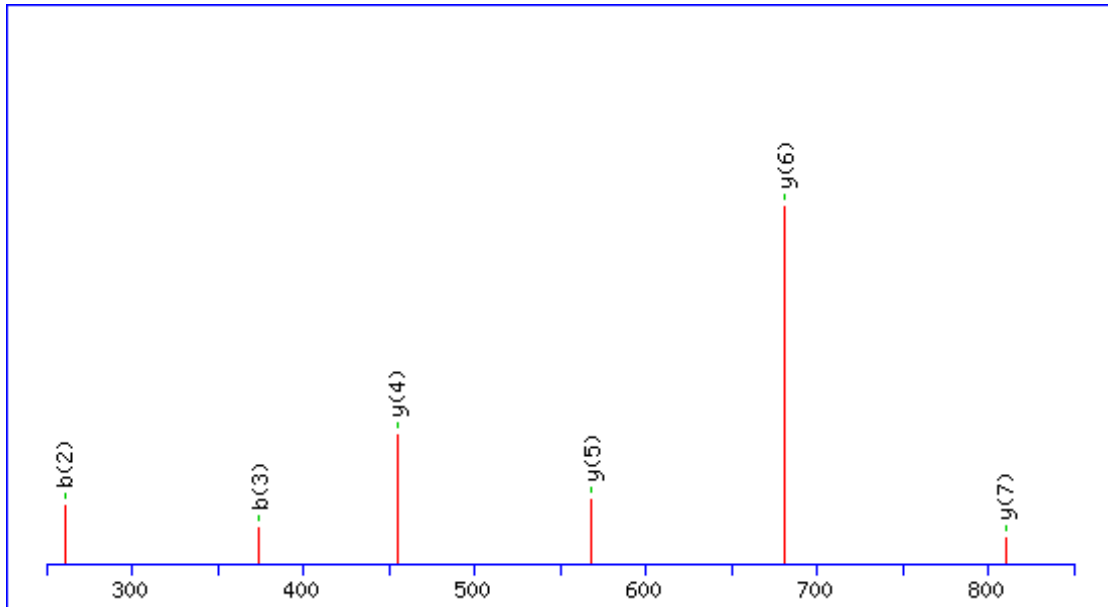

Precursor charge: 2+

Precursor m/z: 471.261061

Monoisotopic mass of neutral peptide Mr(calc): 940.51

Fixed modifications: Carbamidomethyl (C)

Ions Score: 42 Expect: 0.0063

Matches (**Red**): 6/88 fragment ions using 6 most intense peaks

MS/MS Fragmentation of **VLQLETAAGAAIR**

Found in **ES824132**

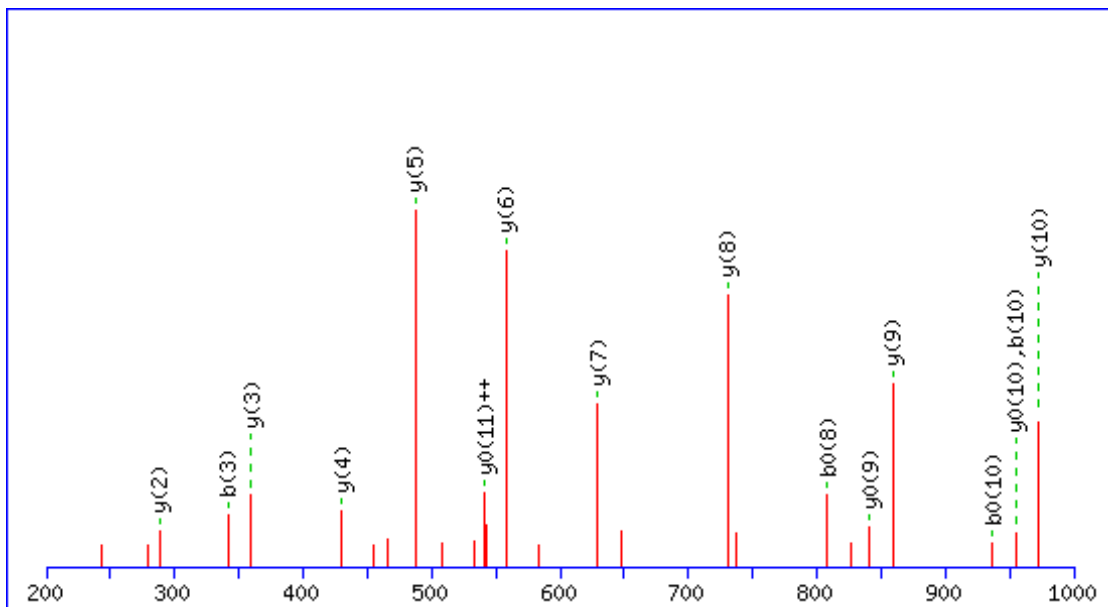

Precursor charge: 2+

Precursor m/z: 656.885979

Monoisotopic mass of neutral peptide Mr(calc): 1311.75

Fixed modifications: Carbamidomethyl (C)

Ions Score: 103 Expect: 4.8e-009

Matches (**Bold Red**): 16/166 fragment ions using 16 most intense peaks

MS/MS Fragmentation of **FFEHAIGINVPR**

Found in **EV482616**

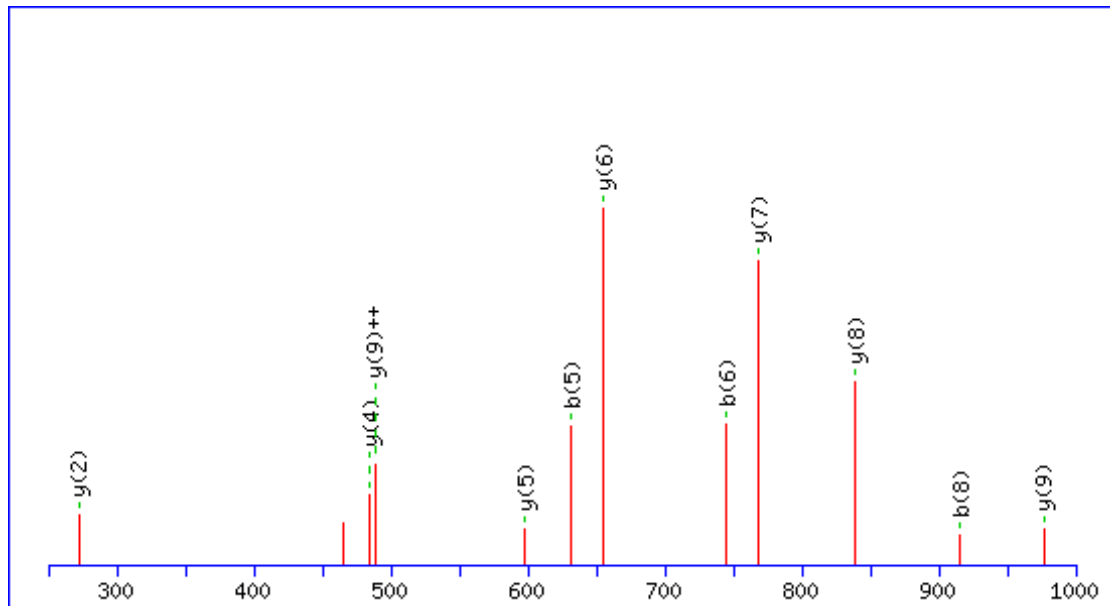

Precursor charge: 2+

Precursor m/z: 700.379610

Monoisotopic mass of neutral peptide Mr(calc): 1398.74

Fixed modifications: Carbamidomethyl (C)

Ions Score: 70 Expect: 1.4e-005

Matches (**Bold Red**): 11/138 fragment ions using 12 most intense peaks

Gh UGP2

Spot 78

MS/MS Fragmentation of **VQLLEIAQVPDEHVNEFK**

Found in **EX172531**

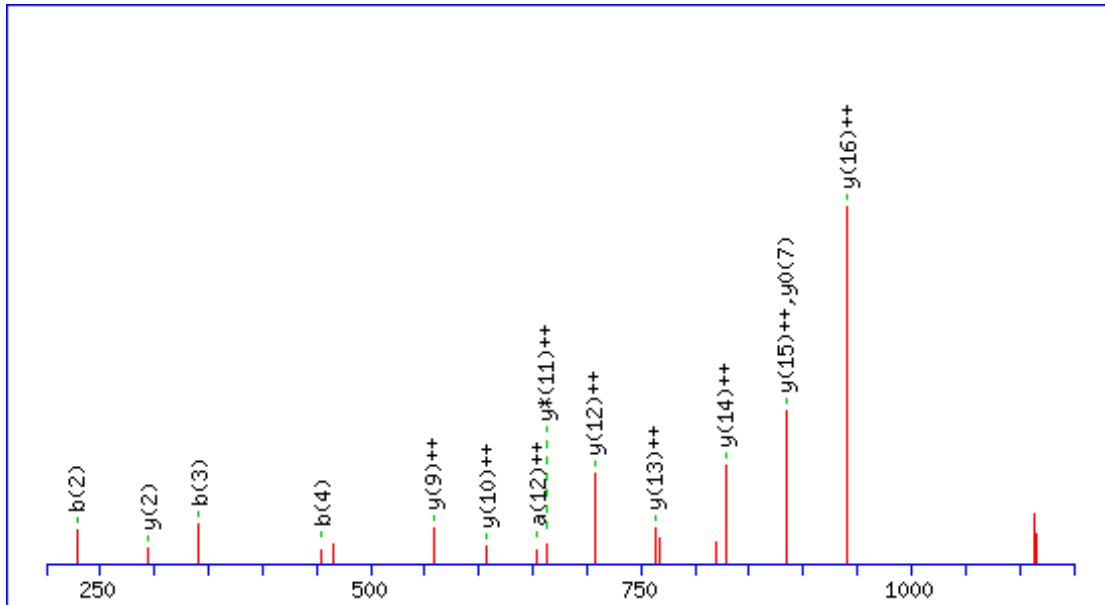

Precursor charge: 3+

Precursor m/z: 703.368945

Monoisotopic mass of neutral peptide Mr(calc): 2107.09

Fixed modifications: Carboxymethyl (C)

Ions Score: 50 Expect: 0.00081

Matches (**Red**): 14/258 fragment ions using 19 most intense peaks

MS/MS Fragmentation of **IFNTNNLWVNLNAIK**

Found in **EX172531**

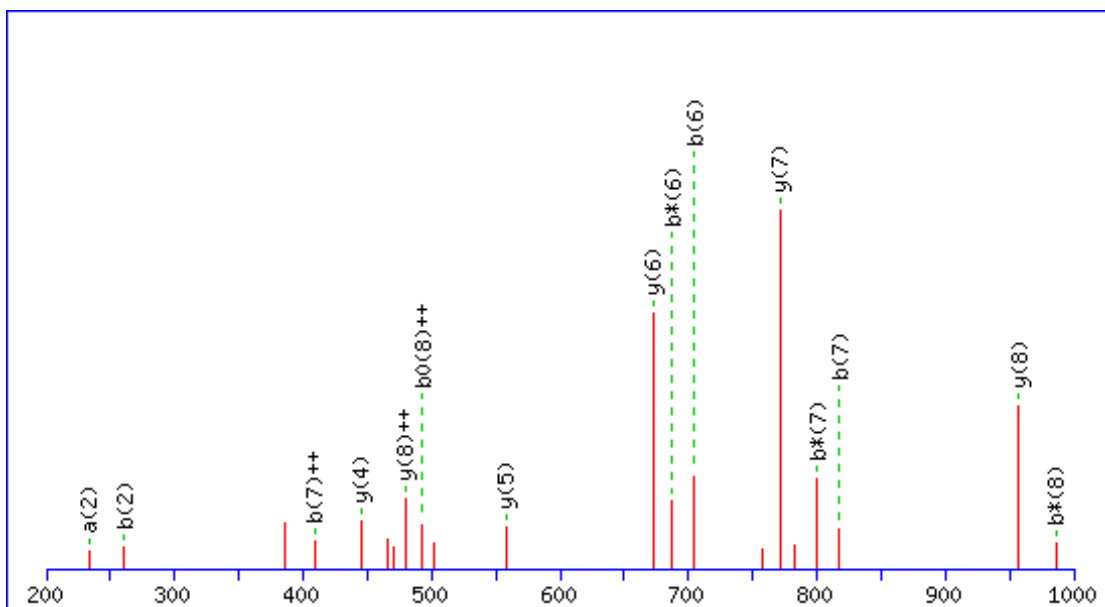

Precursor charge: 3+

Precursor m/z: 591.991483

Monoisotopic mass of neutral peptide Mr(calc): 1772.96

Fixed modifications: Carboxymethyl (C)

Ions Score: 46 Expect: 0.0028

Matches (**Bold Red**): 15/192 fragment ions using 16 most intense peaks

MS/MS Fragmentation of **VLQLETAAGAAIR**

Found in **EX172531**

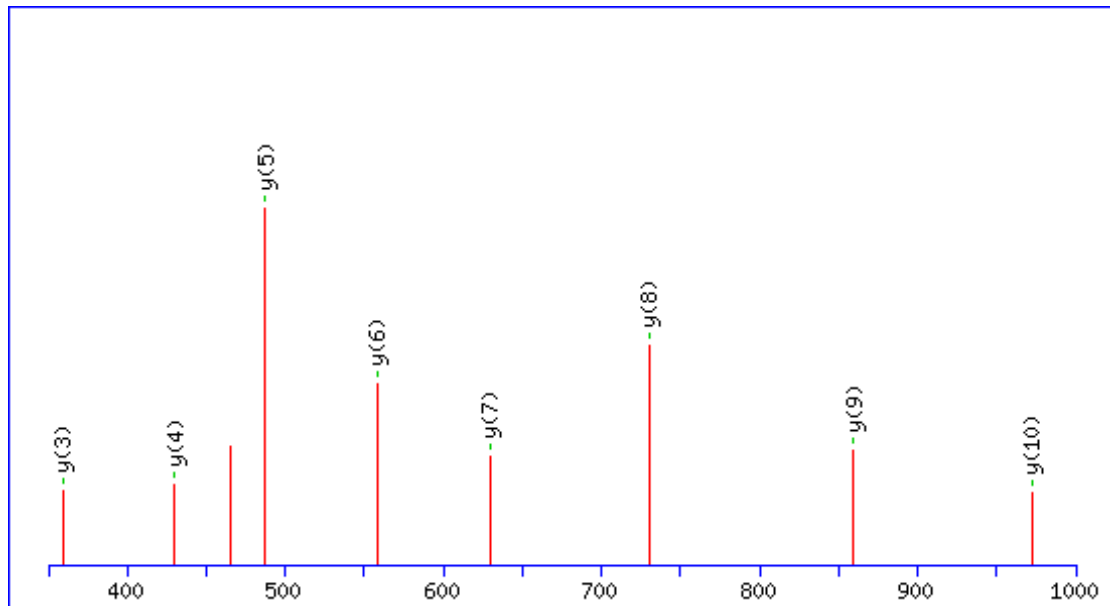

Precursor charge: 2+

Precursor m/z: 656.879840

Monoisotopic mass of neutral peptide Mr(calc): 1311.75

Fixed modifications: Carboxymethyl (C)

Ions Score: 89 Expect: 1.6e-007

Matches (**Bold Red**): 8/166 fragment ions using 9 most intense peaks

Gh UGD1

Spot 83

MS/MS Fragmentation of **AADLTYWESAAR**

Found in **BQ408827**



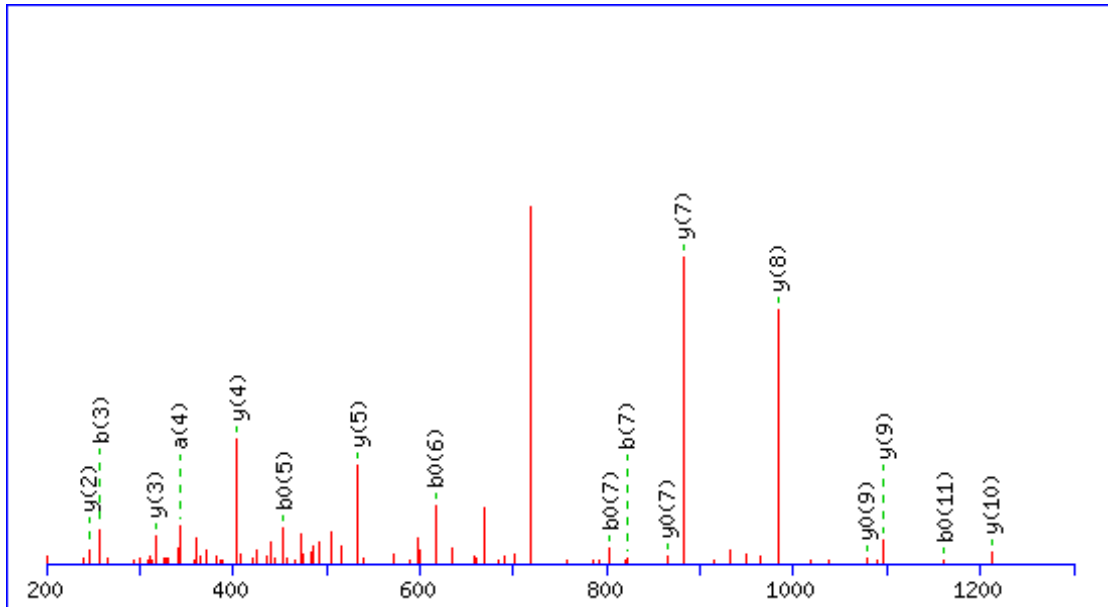

Precursor charge: 2+

Precursor m/z: 677.325629

Monoisotopic mass of neutral peptide Mr(calc): 1352.64

Fixed modifications: Carbamidomethyl (C)

Ions Score: 64 Expect: 5.4e-005

Matches (**Red**): 17/144 fragment ions using 24 most intense peaks

MS/MS Fragmentation of **LAANAFLAQR**

Found in **EY197769**

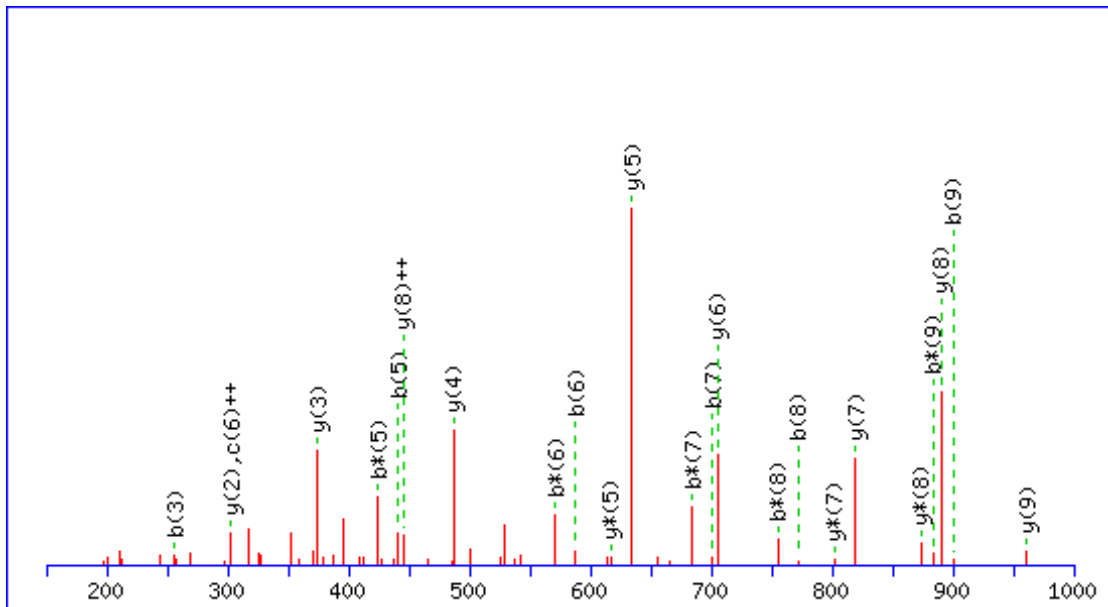

Precursor charge: 2+

Precursor m/z: 537.807238

Monoisotopic mass of neutral peptide Mr(calc): 1073.60

Fixed modifications: Carbamidomethyl (C)

Ions Score: 72 Expect: 8.9e-006

Matches (**Bold Red**): 24/102 fragment ions using 32 most intense peaks

MS/MS Fragmentation of **TAILGFAPK**

Found in **EY197769**

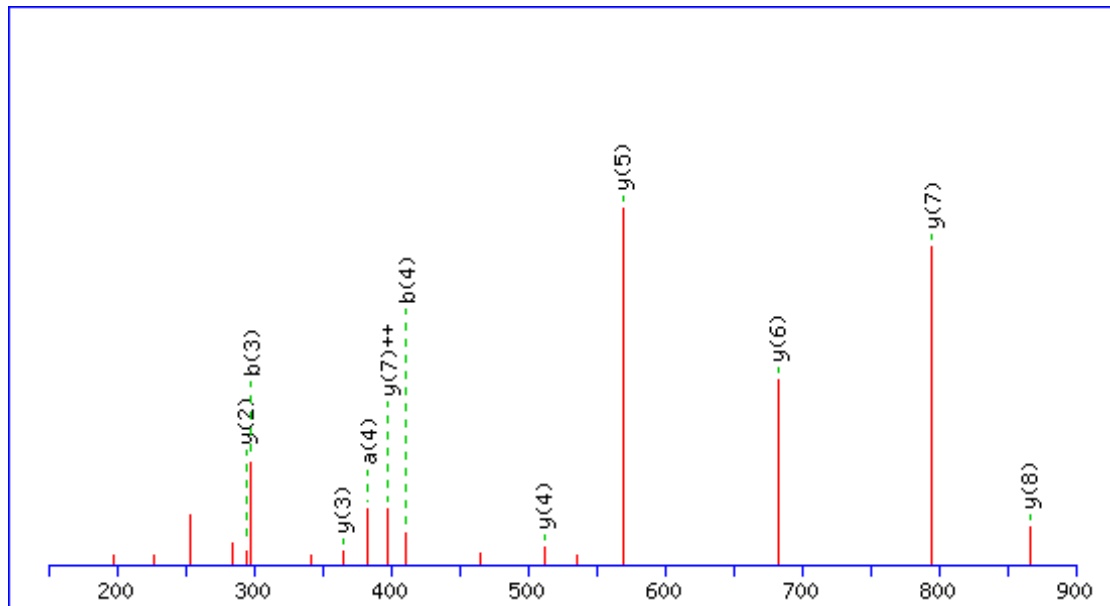

Precursor charge: 2+

Precursor m/z: 490.304020

Monoisotopic mass of neutral peptide Mr(calc): 978.59

Fixed modifications: Carboxymethyl (C)

Ions Score: 63 Expect: 3.1e-005

Matches (**Bold Red**): 11/80 fragment ions using 16 most intense peaks

Spot 81

### MALDI-TOF-TOF MS/MS spectra of ions and the detailed information of mascot search results

MS/MS Fragmentation of **EVYAHWVPEER**

Found in **AI730020**

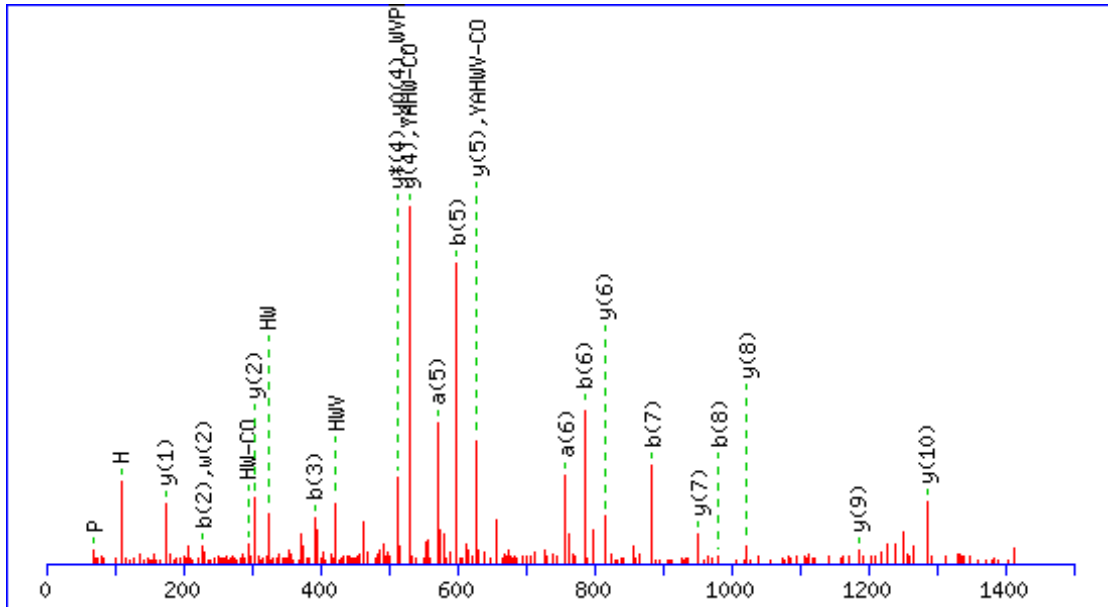

Precursor charge: 1+

Precursor m/z: 1414.697000

Monoisotopic mass of neutral peptide Mr(calc): 1413.67

Fixed modifications: Carbamidomethyl (C)

Ions Score: 61 Expect: 0.0018

Matches (**Bold Red**): 29/149 fragment ions using 35 most intense peaks

MS/MS Fragmentation of **FLNASVGFGGSCFQK**

Found in **AI727145**

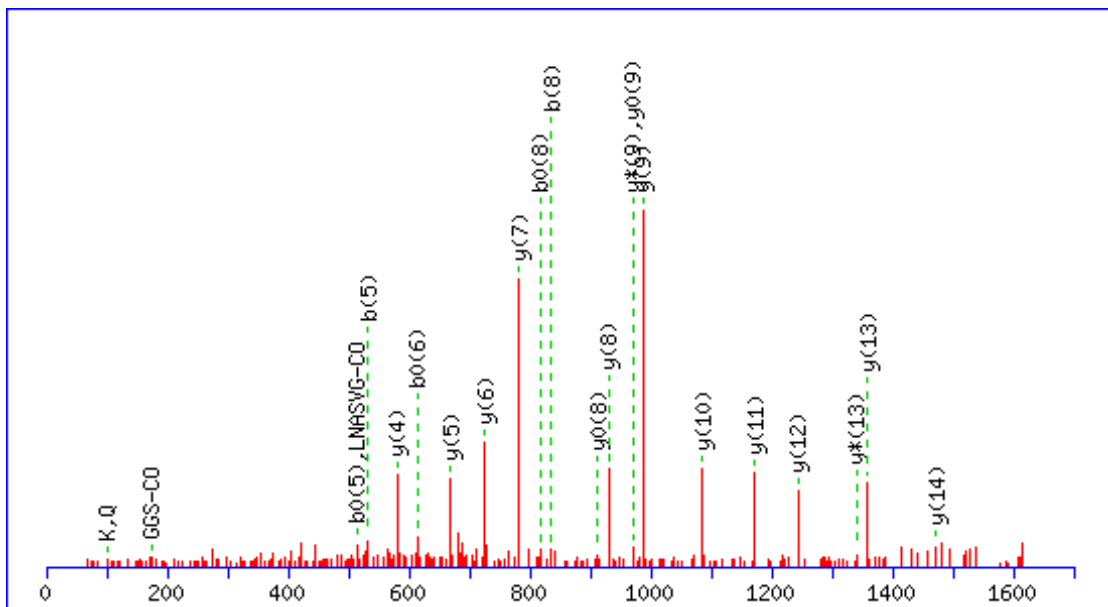

Precursor charge: 1+

Precursor m/z: 1618.781000

Monoisotopic mass of neutral peptide Mr(calc): 1617.76

Fixed modifications: Carbamidomethyl (C)

Ions Score: 76 Expect: 3.7e-005

Matches (**Bold Red**): 24/240 fragment ions using 42 most intense peaks
